# Supplementary material for: Genome-wide transcriptome profiling and spatial expression analyses identify signals and switches of development in tapeworms
Source: EvoDevo. 2018 Nov 9;9:21. doi: 10.1186/s13227-018-0110-5 (PMC6225667; doi:10.1186/s13227-018-0110-5)
Supplement: Supplementary file 1 — Additional file 1. Raw and normalised read counts per gene model and sample replicate. Table S1.1. RNA-seq sample accessions. Table S1.2. RNA-seq mapped read counts by gene model and sample replicate. Table S1.3. Normalised (FPKM) mapped read counts by gene model and sample replicate. [file 13227_2018_110_MOESM1_ESM.xlsx]

## Sheet: S1.1 Sample accessions
Additional file 1. Table S1.1. RNA-seq sample accessions
WTSI Code	WTSI abbreviation	Manuscript abbreviation	Biological replicate	Technical replicate*	Description	Sample accession	Run accession
7893_5#10	Hym_ww	WA 1	1	1	Adult, whole gravid worm	ERS096535	ERR225728
7893_5#11	Hym_ww	WA 2	2	1	Adult, whole gravid worm	ERS096536	ERR225729
7893_5#12	Hym_ww	WA 3	3	1	Adult, whole gravid worm	ERS096537	ERR225730
7893_5#1	Hym_s	Scolex-Neck 1	1	1	Adult, scolex and neck (pooled from 14 pieces)	ERS096526	ERR225719
7893_5#2	Hym_s	Scolex-Neck 2	2	1	Adult, scolex and neck (pooled from 13 pieces)	ERS096527	ERR225720
7893_5#3	Hym_s	Scolex-Neck 3	3	1	Adult, scolex and neck (pooled from 43 pieces)	ERS096528	ERR225721
7893_5#4	Hym_m	Mid 1	1	1	Adult, mid-section (pooled from 11 pieces)	ERS096529	ERR225722
7893_5#5	Hym_m	Mid 2	2	1	Adult, mid-section (pooled from 12 pieces)	ERS096530	ERR225723
7893_5#6	Hym_m	Mid 3	3	1	Adult, mid-section (pooled from 15 pieces)	ERS096531	ERR225724
7893_5#7	Hym_p	End 1	1	1	Adult, posterior (pooled from 11 pieces)	ERS096532	ERR225725
7893_5#8	Hym_p	End 2	2	1	Adult, posterior (pooled from 12 pieces)	ERS096533	ERR225726
7893_5#9	Hym_p	End 3	3	1	Adult, posterior (pooled from 17 pieces)	ERS096534	ERR225727
9887_3#13	Hym_l	LV 1.1	1	1	Larvae, appr. 5 days old, mid-metamorphosis (pooled from ~550 individuals)	ERS242850	ERR337915
9887_4#13	Hym_l	LV 1.2	1	2		ERS242850	ERR337928
9887_5#12	Hym_l	LV 2.1	2	1	Larvae, appr. 5 days old, mid-metamorphosis (pooled from ~550 individuals)	ERS242870	ERR337940
9887_6#12	Hym_l	LV 2.2	2	2		ERS242870	ERR337952
9887_7#12	Hym_l	LV 3.1	3	1	Larvae, appr. 5 days old, mid-metamorphosis (pooled from ~550 individuals)	ERS242862	ERR337964
9887_8#12	Hym_l	LV 3.2	3	2		ERS242862	ERR337976
*Each of three larval samples (LV) were split across two sequencing lanes, resulting in two technical replicates and hence six columns of count data.
N.B. All data are publicly available in the European Nucleotide Archive and Array Express (https://www.ebi.ac.uk/arrayexpress/) under accessions PRJEB5096 and E-ERAD-236, respectively.

## Sheet: S1.2 Mapped read counts
Additional file 1. Table S1.2. RNA-seq mapped read counts by gene model and sample replicate.
Gene Model	Length (bp)		LV 1.1	LV 1.2	LV 2.1	LV 2.2	LV 3.1	LV 3.2	WA 1	WA 2	WA 3	Scolex-Neck 1	Scolex-Neck 2	Scolex-Neck 3	Mid 1	Mid 2	Mid 3	End 1	End 2	End 3
			9887_3#13	9887_4#13	9887_5#12	9887_6#12	9887_7#12	9887_8#12	7893_5#10	7893_5#11	7893_5#12	7893_5#1	7893_5#2	7893_5#3	7893_5#4	7893_5#5	7893_5#6	7893_5#7	7893_5#8	7893_5#9
HmN_000000100	2961		1528	1347	2398	2513	2218	1926	1040	1671	1051	1768	1258	1673	1841	1712	2610	1350	722	984
HmN_000000200	657		246	206	308	350	315	295	547	861	418	289	205	350	1093	897	878	930	467	610
HmN_000000300	1920		2932	2506	4588	4466	4146	3714	1158	1682	1183	2229	1631	2251	1958	1488	2420	1679	906	1531
HmN_000000400	960		624	581	822	978	836	732	223	346	202	493	290	410	401	317	433	313	196	259
HmN_000000500	363		0	3	1	2	19	9	7	9	3	2	0	0	4	5	4	16	10	3
HmN_000000600	297		0	1	0	1	7	8	6	7	2	1	0	0	3	5	0	9	10	4
HmN_000000700	1626		74	59	127	121	104	72	517	688	228	94	54	81	209	213	233	1755	1198	1580
HmN_000000800	735		1234	1118	1847	1816	1758	1707	464	676	465	813	708	1245	766	765	1184	616	326	610
HmN_000000900	1161		716	610	1105	1110	949	852	366	601	304	708	544	771	504	474	679	615	360	613
HmN_000001000	2289		699	567	980	1148	1017	877	207	420	256	713	420	621	495	356	553	325	138	299
HmN_000001100	1023		610	493	926	1008	890	771	268	449	316	678	422	630	696	563	763	418	246	426
HmN_000001200	2007		0	0	0	0	2	0	127	210	179	6	0	1	418	282	508	75	33	8
HmN_000001300	162		270	235	408	493	358	412	163	371	204	347	244	381	385	290	353	237	133	190
HmN_000001400	345		0	0	0	0	0	0	0	2	0	0	0	0	0	1	0	0	0	0
HmN_000001500	492		0	1	1	0	8	9	5	3	1	0	0	2	3	6	2	13	3	2
HmN_000001600	312		26	35	55	65	141	112	17	43	16	2	1	18	65	10	9	36	26	25
HmN_000001700	1668		6962	5915	10739	11231	9591	8458	10260	14685	10632	9160	6662	9487	16033	11984	20427	18630	11570	19060
HmN_000001800	1488		1218	1037	1987	2085	1643	1502	401	714	425	1111	755	1099	893	731	1063	411	183	382
HmN_000001900	891		6766	5685	9851	10384	8632	7800	3164	5357	3030	5565	4264	5334	7367	4809	6289	3227	1691	2129
HmN_000002000	1218		837	656	1179	1171	1054	889	528	806	515	1335	826	1242	1024	828	1113	925	527	898
HmN_000002100	741		564	433	767	803	648	613	193	355	251	239	184	257	672	452	522	259	162	175
HmN_000002200	1707		628	529	986	944	816	734	307	475	338	543	398	430	603	388	675	566	300	422
HmN_000002300	2112		59	66	105	139	119	97	85	154	129	137	89	102	296	216	368	81	21	8
HmN_000002400	3099		565	537	1047	1015	891	778	208	303	187	380	327	345	269	189	318	398	211	428
HmN_000002500	1053		30	36	61	61	40	37	385	614	508	1165	689	1137	813	489	656	842	555	999
HmN_000002600	1575		1721	1525	2458	2566	2113	1889	2306	2772	2197	2700	1897	2422	2679	2067	3156	5039	3278	6782
HmN_000002700	3759		243	201	371	433	366	313	167	155	143	666	446	600	219	132	286	263	103	227
HmN_000002800	882		1168	1077	1722	1808	1678	1483	247	512	323	807	582	912	485	484	703	307	181	293
HmN_000002900	717		28659	24525	40858	43154	39981	35957	4805	7534	5254	11972	8253	12340	10544	6028	9426	5922	3425	5933
HmN_000003100	534		0	0	2	0	0	1	2	0	0	0	3	6	2	1	2	1	0	1
HmN_000003200	621		2490	2138	3644	3702	3445	3179	771	1380	956	2334	1631	2713	1586	1204	1818	961	685	1022
HmN_000003300	5004		1285	1016	1738	1840	1532	1353	4096	6230	4128	4343	3021	3743	6767	5185	8847	7130	3856	6302
HmN_000003400	666		32	44	82	81	65	60	65	110	108	101	84	113	269	117	214	107	61	104
HmN_000003500	1704		340	273	480	531	408	336	179	340	196	267	147	236	359	270	418	382	206	339
HmN_000003600	6693		2227	1854	2987	3226	2909	2630	767	1188	519	1184	834	1062	784	527	901	1523	804	1204
HmN_000003700	2313		505	482	697	778	649	589	1201	1967	1486	2314	1606	2204	2048	1531	2644	2443	1491	2294
HmN_000003800	321		0	0	2	2	2	0	0	0	0	0	0	0	0	0	0	0	0	0
HmN_000003900	639		42	63	70	84	100	47	21	36	13	31	37	33	0	2	15	37	33	70
HmN_000004000	684		92	63	147	120	142	120	316	772	194	1094	530	977	588	335	499	598	425	954
HmN_000004100	873		215	238	368	345	330	284	1653	3389	1039	3910	1691	3927	1813	1378	2343	2552	1856	4486
HmN_000004200	627		4	2	10	4	2	2	0	2	3	7	12	23	3	8	8	8	3	9
HmN_000004300	528		882	728	1323	1158	1268	1228	478	1202	807	1129	365	718	2173	464	328	648	594	841
HmN_000004400	3288		184	181	230	283	204	211	17	23	20	124	60	98	34	21	30	23	12	27
HmN_000004500	4491		630	551	1021	1145	933	843	807	1182	693	1134	846	1192	1102	1144	1762	1381	830	1380
HmN_000004600	891		475	455	796	828	732	631	198	327	209	419	254	441	403	359	458	263	161	254
HmN_000004750	3069		930	786	1491	1497	1306	1317	353	658	476	730	434	689	935	581	640	566	339	570
HmN_000004800	2256		106	103	143	183	153	134	149	214	83	7	3	19	137	128	218	203	106	234
HmN_000005000	2115		1	0	2	0	12	6	551	803	656	138	127	146	1433	1084	1878	427	248	172
HmN_000005100	1284		1283	1055	1720	1878	1632	1501	614	890	593	1260	773	1266	1070	805	1251	1126	632	1166
HmN_000005200	900		271	215	386	390	367	310	177	321	238	489	280	511	402	351	464	224	101	107
HmN_000005300	2775		355	302	528	550	441	425	120	227	242	448	369	437	227	167	273	251	123	280
HmN_000005500	1944		905	728	1305	1325	1089	951	718	956	687	1373	896	1345	956	820	1292	1274	777	1541
HmN_000005600	606		23	32	44	54	35	27	12	28	24	42	46	59	15	15	31	20	14	20
HmN_000005700	4668		21	13	39	23	23	26	8	13	11	114	59	90	7	3	5	8	2	14
HmN_000005800	1263		589	492	822	882	823	780	93	193	124	269	156	310	231	159	307	175	87	76
HmN_000005900	300		7029	5874	9064	9802	9342	8612	719	1475	1072	4531	1633	2400	4260	656	913	529	406	513
HmN_000006000	5163		1584	1408	2757	2974	2527	2237	1009	1590	1020	1387	1011	1300	2712	2204	2957	1230	470	390
HmN_000006100	603		130	111	191	234	186	177	158	244	222	255	167	237	509	370	452	197	149	239
HmN_000006300	969		23	19	35	34	17	19	12	8	11	18	22	44	19	10	16	25	4	16
HmN_000006400	2238		297	242	426	410	349	312	64	150	62	320	199	355	113	55	96	136	78	167
HmN_000006500	3141		807	723	1258	1267	1124	993	456	658	418	780	568	696	618	431	747	735	384	652
HmN_000006600	975		303	318	455	475	385	373	160	215	124	248	147	300	208	165	243	288	160	325
HmN_000006700	3639		1292	1120	2081	2235	1783	1623	553	832	634	979	711	951	1353	1491	1726	612	210	267
HmN_000006800	231		586	539	836	766	690	625	189	218	128	283	86	153	133	62	131	170	59	135
HmN_000006900	474		0	0	0	0	1	0	0	0	0	0	0	0	2	3	0	0	0	0
HmN_000007000	333		12	12	11	7	9	2	125	191	76	1	0	4	6	0	1	447	253	267
HmN_000007100	324		197	387	312	608	548	478	54	58	60	185	76	106	334	42	61	67	61	31
HmN_000007300	1443		595	489	897	889	837	697	452	738	405	582	415	603	750	740	949	865	465	518
HmN_000007400	1626		1	2	2	0	0	1	0	0	0	0	0	0	0	0	0	0	0	0
HmN_000007500	2763		998	897	1678	1578	1399	1375	514	810	544	885	703	829	944	1011	1459	658	344	466
HmN_000007600	303		516	449	812	760	770	678	24	63	35	133	42	60	174	20	32	47	20	41
HmN_000007700	291		1	0	0	0	0	0	0	0	0	0	0	0	0	0	0	0	0	0
HmN_000007800	1416		964	760	1285	1343	1167	1107	495	943	687	1963	1598	2100	940	696	1075	1358	792	1493
HmN_000007900	528		0	0	6	0	1	0	9	3	4	0	0	2	11	21	10	1	0	0
HmN_000008000	1389		183	156	334	378	257	244	159	224	160	166	109	162	330	205	441	189	87	99
HmN_000008100	612		830	731	1058	1210	1065	969	404	884	616	858	474	877	1394	886	990	655	367	572
HmN_000008200	2382		1543	1260	2406	2497	2117	1874	1558	2489	1543	2246	1516	2010	2695	2174	3656	2354	1287	2189
HmN_000008300	2985		14	9	17	32	17	7	183	250	175	12	14	16	448	322	583	121	61	46
HmN_000008400	909		1745	1437	2441	2444	2224	1927	893	1419	867	2090	1582	2059	1541	1312	2168	1445	819	1208
HmN_000008500	2319		161	131	211	258	171	143	224	291	290	78	83	76	616	418	795	178	72	25
HmN_000008600	447		185	153	322	329	348	303	42	78	66	131	86	95	119	35	28	7	8	22
HmN_000008700	4698		1551	1406	2543	2598	2091	1972	271	532	260	740	619	747	387	311	445	660	331	578
HmN_000008800	3585		1855	1521	2888	3089	2678	2395	1326	2331	1387	2584	1780	2381	2251	1725	2872	2718	1383	2266
HmN_000008900	1488		1625	1453	2414	2491	2086	1862	10857	30120	8742	44495	26732	55490	12071	13275	25538	4916	6981	6200
HmN_000009000	1113		1	0	0	0	1	1	12	25	22	0	0	2	46	21	94	7	5	0
HmN_000009100	960		670	555	1036	1052	954	894	322	598	360	629	373	733	759	601	868	487	299	455
HmN_000009200	2430		688	586	1119	1208	869	877	685	1108	729	1119	703	1015	1555	1336	1948	1040	528	747
HmN_000009300	675		1119	952	1496	1575	1457	1231	273	404	370	639	400	683	768	492	745	314	167	287
HmN_000009400	2271		1584	1407	2613	2698	2232	1957	797	1390	883	1538	1003	1567	1881	1856	2350	1000	488	664
HmN_000009500	2508		10	7	7	15	10	16	63	113	71	3	4	4	145	108	258	21	7	2
HmN_000009600	495		0	0	0	0	0	0	0	0	0	0	0	0	0	0	0	0	0	0
HmN_000009700	726		0	0	0	0	0	0	45	68	17	0	0	2	177	68	165	55	58	0
HmN_000009800	270		0	0	0	0	0	0	0	0	0	0	0	0	0	0	0	0	0	0
HmN_000009900	756		71	73	108	115	115	113	30	70	18	24	28	59	40	12	24	37	25	57
HmN_000010000	738		228	146	299	286	252	236	137	255	120	334	212	369	329	174	211	202	103	241
HmN_000010100	2217		2529	2038	3333	3668	3108	2881	627	980	711	853	601	852	1389	1052	1477	797	416	547
HmN_000010200	870		17	16	7	20	15	13	105	152	140	0	2	7	617	503	388	105	45	5
HmN_000010300	1281		1369	1109	1752	2072	1839	1586	429	730	482	717	521	679	874	752	997	761	405	666
HmN_000010400	2382		103	94	130	143	119	86	72	94	56	136	128	177	106	54	79	114	56	96
HmN_000010500	825		527	473	811	793	759	687	200	290	256	374	263	520	434	477	650	190	117	136
HmN_000010600	429		54	53	82	119	66	86	8	4	4	6	4	3	35	3	10	2	2	0
HmN_000010700	1470		794	555	1078	1161	804	846	598	1012	635	914	589	853	1172	824	1372	618	363	473
HmN_000010800	2394		898	828	1477	1503	1292	1162	301	373	289	880	654	875	391	320	497	417	296	427
HmN_000010900	891		37	32	50	49	38	38	77	76	83	56	30	46	174	115	212	45	15	38
HmN_000011000	1317		32	47	89	110	93	54	146	160	171	79	64	111	376	256	475	94	58	67
HmN_000011100	4230		107	62	114	153	95	97	678	1006	660	730	579	648	926	627	1032	1462	770	1380
HmN_000011200	792		12	18	19	14	5	12	8	31	22	44	31	77	20	7	11	4	5	1
HmN_000011300	942		20	23	35	38	44	38	21	46	26	77	46	87	25	24	44	15	9	10
HmN_000011400	5061		739	595	1167	1296	1037	947	331	487	254	407	307	459	572	559	719	387	205	312
HmN_000011500	567		13	4	25	18	10	12	7	15	6	9	6	7	8	6	16	21	18	18
HmN_000011600	567		581	407	881	933	815	707	94	154	111	443	344	450	270	133	224	138	88	129
HmN_000011700	456		313	216	407	417	396	355	183	286	281	278	172	281	911	511	326	154	106	131
HmN_000011800	3378		490	431	929	969	681	560	254	421	196	466	323	478	426	348	609	280	174	218
HmN_000011950	4104		128	96	174	182	186	118	30	54	54	20	6	24	104	44	32	28	16	40
HmN_000012000	519		0	0	0	0	0	0	0	0	0	0	0	0	0	0	0	0	0	0
HmN_000012100	1224		526	418	785	808	681	679	200	270	228	389	304	420	429	298	558	226	136	216
HmN_000012200	1812		587	509	995	994	864	726	381	640	462	805	599	750	670	577	890	686	319	520
HmN_000012300	666		10118	8550	13950	14458	13857	12682	1155	1495	1044	2652	1972	2950	1938	1676	3110	1439	790	1347
HmN_000012400	1221		7	5	9	12	12	8	207	302	212	11	13	12	1149	1176	721	235	25	12
HmN_000012500	1404		3112	2470	4349	4504	4211	3645	1812	2686	1994	4383	3193	5038	3175	2293	3738	3113	1993	3025
HmN_000012600	855		602	537	914	865	873	800	275	445	217	444	306	488	436	332	512	375	237	385
HmN_000012700	876		12	6	9	9	16	10	216	235	248	2	7	12	1068	1073	767	220	36	13
HmN_000012800	1986		280	239	538	540	466	416	168	250	200	197	169	219	601	655	831	146	66	58
HmN_000012900	603		14	22	37	22	21	26	0	0	0	6	2	8	2	3	3	2	2	4
HmN_000013000	1917		481	438	781	872	627	632	1873	3215	2121	4360	3053	4196	2786	2329	4028	3405	2216	3302
HmN_000013100	447		0	0	0	0	1	0	1	1	0	0	3	0	0	0	0	0	0	2
HmN_000013200	1653		389	351	663	652	545	456	207	426	232	341	243	321	317	245	391	471	331	494
HmN_000013300	780		1328	1163	1864	1946	1939	1742	655	1173	958	765	484	654	3114	2054	1321	497	185	119
HmN_000013400	1308		1450	1281	2293	2412	2090	1837	1113	1989	859	1512	1015	1401	2393	1537	2306	1330	709	1598
HmN_000013500	3726		3697	3264	5554	5861	5065	4455	1302	2055	1065	1952	1608	1682	1511	1316	1934	2682	1447	2291
HmN_000013600	2502		428	339	679	687	613	511	356	592	450	728	541	775	714	771	1100	428	238	288
HmN_000013700	891		40	35	58	53	51	38	42	59	52	151	87	166	103	52	92	84	37	53
HmN_000013800	1746		896	708	1483	1524	1263	1109	462	789	580	1305	700	1159	957	628	852	854	472	748
HmN_000013900	624		0	0	0	0	0	2	1	2	0	0	0	0	2	2	8	5	3	7
HmN_000014000	525		0	0	0	0	0	3	0	3	0	0	0	0	0	0	2	0	0	1
HmN_000014100	1269		1334	1096	1870	1958	1660	1468	494	724	629	765	498	815	1127	1044	1296	682	353	459
HmN_000014300	1194		1205	1122	1926	2108	1634	1525	576	899	482	1029	682	935	1071	819	1222	734	366	705
HmN_000014400	375		0	0	0	0	1	0	0	0	0	0	0	0	0	0	0	0	0	0
HmN_000014500	1164		616	470	1048	1016	934	828	338	695	427	679	472	761	793	617	920	645	312	463
HmN_000014600	1884		314	272	406	456	357	367	592	983	528	746	589	694	859	657	995	1360	812	1289
HmN_000014700	2784		1457	1260	2123	2271	1997	1811	558	779	576	922	591	843	1127	1150	1426	667	336	528
HmN_000014800	1260		725	655	1128	1157	1006	909	449	780	528	932	650	1049	973	759	962	851	503	807
HmN_000014900	12345		12	15	15	17	71	97	1089	2112	1219	217	144	454	1425	1169	1394	3191	1989	1966
HmN_000015000	1590		1022	823	1580	1603	1390	1178	659	1101	765	1486	1073	1595	1370	1162	1885	947	570	799
HmN_000015100	2310		756	627	1142	1339	971	935	276	449	267	571	411	469	482	504	681	380	170	277
HmN_000015200	1653		31	20	44	27	33	21	46	62	25	8	1	7	76	27	17	35	10	52
HmN_000015300	1587		4210	3746	6689	6572	5916	5397	1533	2247	1660	3032	2262	3073	2841	2492	3629	2211	1156	1709
HmN_000015400	3195		688	483	956	1006	838	779	760	1254	893	1548	1062	1362	1684	1295	2010	1205	699	1055
HmN_000015500	7122		1373	1263	2160	2300	1934	1744	739	1019	732	1073	776	860	1193	1176	1648	1110	529	819
HmN_000015600	1332		5	0	15	1	10	2	0	6	5	6	3	3	24	33	13	8	0	4
HmN_000015700	945		0	0	0	0	0	0	0	1	0	1	0	0	0	0	0	0	0	0
HmN_000015800	1656		205	161	220	243	187	152	448	790	469	728	521	814	940	600	878	939	529	659
HmN_000015900	885		6374	5520	9629	10030	8722	7851	1867	2917	2084	4071	3068	4608	3598	2545	3595	2117	1506	2452
HmN_000016000	375		15575	13242	22298	23441	23598	21136	87	209	166	608	208	407	812	120	232	151	97	87
HmN_000016100	1053		546	467	784	878	647	577	14	29	26	90	37	55	21	4	21	31	24	36
HmN_000016200	279		0	0	0	1	0	0	0	0	0	0	0	0	1	0	0	0	1	0
HmN_000016300	8289		2248	1913	3847	3838	3061	2749	853	1408	969	1633	1179	1458	1592	1405	2035	1357	655	1113
HmN_000016400	1686		25	18	31	35	25	22	466	696	671	31	15	32	1389	1157	2189	327	174	45
HmN_000016500	615		39	50	82	83	67	54	263	304	283	42	39	53	1215	1058	1046	212	78	13
HmN_000016600	3024		0	0	0	4	22	5	1	0	0	2	0	0	2	2	2	0	0	0
HmN_000016700	408		3	0	6	7	0	10	0	0	0	0	0	0	1	0	0	0	0	0
HmN_000016800	1878		12190	10560	17252	16767	13343	12886	4860	6987	4633	14944	10161	13520	8342	6285	8974	5129	3587	5401
HmN_000016900	1284		1541	1331	2353	2329	2093	1798	557	764	534	1078	764	1231	946	586	1095	932	620	858
HmN_000017000	1326		5156	4454	7968	8424	7656	7022	2043	3083	2287	5891	4532	6508	4008	3522	5462	2219	1249	1550
HmN_000017100	2193		856	733	1378	1443	1210	1057	343	630	440	1071	784	857	716	514	727	707	400	590
HmN_000017200	1101		259	197	365	406	314	323	77	157	101	251	141	249	196	114	122	154	94	146
HmN_000017300	2187		342	288	422	500	417	427	175	273	163	531	424	540	266	278	484	256	209	260
HmN_000017400	3264		1058	911	1737	1708	1396	1317	337	551	311	656	481	598	529	537	802	479	245	373
HmN_000017500	1215		2157	1916	3082	3375	2897	2652	621	860	699	1267	927	1422	1110	946	1450	844	496	736
HmN_000017600	1200		11437	9486	15895	16572	15573	13884	10038	19213	10315	13428	8756	13184	17635	13517	19498	19948	10961	20318
HmN_000017700	444		5	8	8	11	10	15	5	6	1	8	8	6	10	17	19	4	6	5
HmN_000017800	6654		2907	2348	4627	4978	4005	3617	1103	2133	1217	1816	1283	1790	2187	2010	2777	1779	752	1025
HmN_000017900	1125		1041	857	1536	1574	1416	1237	538	984	541	1029	813	1061	1249	804	1329	704	428	627
HmN_000018000	3561		1587	1392	2617	2660	2152	2138	657	1125	643	1060	798	1040	1056	855	1332	1159	611	716
HmN_000018100	1284		640	564	1061	1069	938	836	271	468	315	456	381	494	573	307	537	475	269	315
HmN_000018200	1461		1522	1238	2388	2573	2071	1987	600	1026	635	1444	1085	1672	1250	1001	1610	733	521	592
HmN_000018300	3159		925	752	1369	1410	1189	1050	375	591	388	628	462	635	522	469	771	588	337	575
HmN_000018400	1491		4154	3668	6437	6969	5557	5038	1277	2102	1431	2935	2053	2872	3001	2182	2898	1697	941	1491
HmN_000018500	1650		0	7	9	8	5	6	142	187	173	5	2	5	352	214	558	74	34	10
HmN_000018600	2319		472	374	735	739	617	592	629	1060	604	1189	810	1186	1117	939	1287	1148	637	1087
HmN_000018700	1926		1068	1053	1820	1956	1619	1457	744	1291	817	1470	1281	1763	1436	1262	1911	1099	628	887
HmN_000018800	3075		1990	1776	3329	3529	2988	2683	1490	2338	1498	2504	2068	2543	3524	3164	3977	1850	1007	1097
HmN_000018900	882		0	0	1	0	0	3	1315	1937	1691	11	18	18	6452	6307	5689	1070	178	26
HmN_000019000	3114		594	476	1000	1095	866	758	475	850	612	746	642	785	1383	1286	1530	541	256	224
HmN_000019100	1350		1824	1465	2724	2826	2425	2226	862	1263	924	1723	1346	1920	1656	1384	2186	1023	647	1110
HmN_000019200	363		1	0	0	0	0	0	0	0	0	0	0	0	0	0	0	0	0	0
HmN_000019300	705		3	0	2	3	0	3	0	0	0	0	0	0	0	0	0	0	0	0
HmN_000019400	312		13	19	23	26	20	15	0	2	0	2	0	0	2	7	3	0	1	0
HmN_000019500	576		2	4	0	0	3	0	2	1	0	5	3	7	0	0	0	0	0	0
HmN_000019600	522		9	10	2	17	6	15	3	2	14	306	113	268	12	0	1	3	7	6
HmN_000019700	663		1	11	8	2	3	11	1	0	2	25	18	12	0	0	0	3	0	0
HmN_000019800	411		31	32	31	42	30	24	2	0	0	1	1	3	2	0	1	0	0	0
HmN_000019900	675		6077	5354	7435	7804	6279	5428	5	12	8	22	5	13	14	3	2	3	0	2
HmN_000020000	657		0	0	0	0	0	0	0	0	0	0	0	0	0	0	0	0	0	0
HmN_000020100	1104		0	0	0	0	0	0	0	0	0	0	0	0	0	0	0	0	0	0
HmN_000020200	528		385	353	602	565	557	572	171	313	205	339	235	318	626	432	471	212	113	234
HmN_000020300	1035		166	131	244	244	242	226	193	307	274	449	360	582	392	298	537	473	297	510
HmN_000020400	522		18	16	26	43	34	29	26	48	33	8	9	21	113	43	123	24	14	14
HmN_000020500	261		5	11	8	8	7	2	13	21	15	9	4	12	32	24	79	13	7	2
HmN_000020600	651		382	277	469	488	437	403	179	365	237	346	239	392	499	482	659	307	202	331
HmN_000020700	2274		483	360	701	734	603	555	289	600	374	725	481	654	522	390	649	672	349	656
HmN_000020800	663		31	28	47	48	70	56	22	37	14	26	29	20	18	14	30	35	21	20
HmN_000020900	3189		1972	1643	3056	3049	2418	2405	1037	1541	960	1570	1285	1600	1677	1473	2139	1639	888	1464
HmN_000021000	2151		3165	2668	4666	4887	3932	3548	4174	6309	3966	15733	11034	16181	5785	5997	9923	4228	2476	3481
HmN_000021100	1455		349	303	506	559	492	399	120	201	102	286	183	247	250	223	324	164	79	135
HmN_000021200	753		2730	2393	4261	4224	3891	3636	1276	2231	1142	1616	1125	1706	3020	2152	3091	1701	809	1168
HmN_000021300	4248		1330	1173	2365	2448	1908	1626	865	1525	928	1332	1034	1350	1651	1738	2431	1032	579	811
HmN_000021400	1224		402	341	716	755	591	555	1036	1451	609	29	21	24	1945	1354	1610	972	305	939
HmN_000021500	4524		675	554	1094	1144	871	860	189	272	121	401	348	499	245	238	327	413	266	373
HmN_000021600	1809		602	508	984	997	912	776	285	507	279	541	443	570	712	619	986	360	159	186
HmN_000021700	945		60	51	105	103	79	97	135	211	71	45	62	66	107	88	114	317	154	263
HmN_000021800	1110		18039	15881	27680	29467	27527	24215	972	1944	1492	5482	3733	5496	2613	1699	2658	1123	614	562
HmN_000021900	1245		45	30	53	73	52	39	30	52	31	73	61	153	63	52	64	41	7	17
HmN_000022000	120		0	0	0	0	0	0	0	0	0	0	0	0	0	0	0	0	0	0
HmN_000022100	1230		0	0	0	0	0	0	0	0	0	0	0	1	0	0	0	0	0	0
HmN_000022200	1023		6	16	4	17	20	19	2	2	2	17	2	20	0	4	4	2	0	2
HmN_000022300	1020		2	1	6	4	4	3	0	0	0	14	11	10	2	2	4	10	2	0
HmN_000022400	1503		0	0	0	0	2	4	1969	4203	1158	5	2	3	5	10	360	2981	1717	3059
HmN_000022600	1227		791	661	1277	1274	1252	980	249	424	317	557	347	471	695	549	815	284	113	112
HmN_000022700	249		233	183	249	299	250	204	3	1	4	9	2	5	17	0	4	1	0	1
HmN_000022800	1401		412	341	577	554	550	439	253	433	250	988	630	875	477	291	465	305	182	236
HmN_000022900	270		632	539	962	939	921	812	50	82	69	152	44	116	297	46	59	76	44	71
HmN_000023000	1761		2712	2363	4156	4073	3358	3138	1124	1569	1245	2150	1374	1835	2334	1890	2636	1622	927	1475
HmN_000024700	1050		14	25	20	16	9	21	52	104	60	86	43	87	129	63	96	116	80	80
HmN_000024800	996		4012	3437	6170	6252	5332	4763	2108	3008	2464	7323	5888	7557	3760	3241	5900	2441	1624	2027
HmN_000025000	1302		5616	4891	7921	8062	7008	6191	2134	3314	1973	3743	2723	3761	3476	3088	4480	3095	1867	3045
HmN_000025100	5535		2579	2200	4083	4078	3631	3226	935	1577	1061	2328	1444	1840	2404	1401	1976	1445	830	1274
HmN_000025300	915		4191	3622	6391	6807	6197	5552	1287	2095	1494	2622	1970	3106	2842	1783	2950	1907	1261	1831
HmN_000025400	2469		314	265	451	447	396	346	399	666	388	589	404	619	556	337	548	779	408	637
HmN_000025500	1350		49	43	64	93	61	50	38	54	24	116	83	114	51	44	66	62	42	43
HmN_000025600	1245		1675	1465	2465	2472	2069	1942	374	660	351	1152	967	1427	738	501	968	631	412	579
HmN_000025700	720		1200	956	1683	1856	1701	1474	354	593	526	1016	484	770	1486	603	638	423	326	371
HmN_000025800	591		5714	4888	8219	8564	8165	7328	2040	2997	1562	2640	1916	2996	2957	2655	4273	4164	2242	4882
HmN_000026000	2550		1166	992	1724	1794	1449	1333	606	1108	692	943	733	876	1466	1389	2155	948	468	674
HmN_000026200	201		0	0	0	1	0	1	0	0	0	0	0	0	0	0	0	0	0	0
HmN_000026400	2169		572	470	935	876	798	769	406	704	478	767	581	801	1109	1084	1246	533	295	465
HmN_000026500	3900		1172	912	1612	1679	1389	1176	317	514	347	670	504	618	611	559	845	405	183	253
HmN_000026600	813		2698	2285	3961	4127	3632	3437	1263	1759	1310	2497	1770	2895	2193	1682	2191	1708	1111	2238
HmN_000026700	1596		255	222	409	446	397	350	200	322	307	84	58	148	631	447	805	139	46	48
HmN_000026800	8988		185	150	262	272	199	208	45	49	54	104	69	91	71	82	86	62	20	26
HmN_000026900	1119		565	503	852	881	723	627	249	467	358	902	476	715	645	444	635	477	294	469
HmN_000027000	555		4239	3632	5590	5865	4868	4393	5366	8047	5466	8332	6254	10286	7294	5937	6761	10225	6733	8752
HmN_000027100	2673		22	20	33	52	33	50	16	25	45	44	44	65	39	52	109	8	11	3
HmN_000027200	1713		731	638	1123	1112	1007	910	233	363	231	415	360	471	398	395	595	319	134	232
HmN_000027300	255		700	559	847	892	953	799	131	258	200	359	134	262	325	110	160	246	133	270
HmN_000027400	1302		209	189	303	270	234	226	183	217	122	323	209	336	166	125	178	361	227	248
HmN_000027500	987		982	948	1557	1662	1369	1298	568	891	513	736	443	598	1076	724	1037	1262	809	935
HmN_000027700	1770		2169	2047	3225	3484	3053	2862	1022	1807	1199	2290	1596	2334	1932	1642	2470	1713	968	1765
HmN_000027840	126		67	52	123	127	127	100	49	86	71	135	91	92	205	64	75	75	40	40
HmN_000027860	222		148	96	211	203	217	198	23	68	52	109	81	103	179	35	45	41	16	34
HmN_000027900	1002		142	157	244	307	248	207	86	165	116	292	177	342	205	147	219	146	92	150
HmN_000028000	2145		886	778	1468	1422	1368	1212	1091	1691	1267	1423	1067	1544	2901	3569	4106	1112	525	442
HmN_000028100	1311		12	8	10	12	4	7	186	239	180	0	0	2	444	354	774	113	38	8
HmN_000028200	6804		2108	1751	3301	3470	2728	2491	766	1082	748	940	790	1022	1429	1256	1730	1144	792	929
HmN_000028300	4101		218	159	369	393	327	277	44	47	40	153	86	122	51	64	60	41	27	41
HmN_000028400	1773		1	3	0	1	1	0	139	201	178	7	6	10	378	312	511	117	43	9
HmN_000028500	1263		398	391	596	624	544	445	438	674	469	724	512	681	983	837	1185	747	482	856
HmN_000028700	963		16	22	23	45	28	25	0	5	1	0	0	0	1	0	0	5	2	5
HmN_000028900	321		0	0	0	0	2	0	0	0	0	0	0	0	0	0	0	0	0	0
HmN_000029000	1674		314	248	509	519	410	382	30	74	26	118	77	126	36	16	28	35	13	72
HmN_000029100	426		0	0	0	0	0	3	0	0	0	0	0	0	10	2	2	1	0	0
HmN_000029200	1668		155	118	238	214	178	178	175	199	175	63	59	81	626	581	476	156	43	63
HmN_000029300	1431		1639	1411	2385	2327	2197	1983	582	993	765	1825	1450	2211	1231	1351	2184	783	448	668
HmN_000029400	729		550	449	729	815	752	758	195	291	212	350	237	395	421	349	662	430	205	430
HmN_000029500	1008		304	325	595	591	505	494	311	535	330	435	286	390	459	288	419	605	374	684
HmN_000029600	2352		255	171	354	352	272	291	61	134	58	145	102	132	143	104	160	121	46	102
HmN_000029700	762		0	1	1	1	0	0	0	0	0	2	0	0	0	0	0	0	0	0
HmN_000029800	1614		581	545	898	958	741	727	903	1731	1008	998	627	870	1408	918	1382	2073	1172	2184
HmN_000029900	2445		453	362	646	671	601	514	297	474	236	812	626	786	264	204	331	620	386	483
HmN_000030000	1239		2313	2004	3297	3700	2941	2562	1643	2366	1609	2761	1875	2666	3346	2303	2784	3059	1832	2903
HmN_000030100	1308		1427	1237	2098	2136	2129	1798	459	664	540	1348	995	1604	955	734	1160	552	327	379
HmN_000030200	1371		48	83	114	112	89	105	32	70	35	100	85	124	28	12	53	53	52	103
HmN_000030400	279		0	0	0	0	1	0	0	0	0	0	0	0	2	0	2	0	0	0
HmN_000030500	1845		2297	1963	3578	3735	3383	2944	952	1558	1036	1439	908	1455	2403	1509	2449	1508	754	1203
HmN_000030600	1404		10	12	10	8	12	10	66	101	52	0	1	4	138	126	215	33	9	14
HmN_000030700	2991		232	259	447	452	380	346	443	753	532	283	183	238	1672	1724	1744	578	174	266
HmN_000030800	498		0	0	0	0	0	0	123	138	157	3	1	4	570	540	492	69	21	16
HmN_000030900	951		10651	9310	17419	18181	18404	16914	6505	6848	4463	11982	9943	13831	10463	6833	8731	4552	3037	2521
HmN_000031000	4968		1545	1412	2573	2602	2201	2013	633	1153	683	1321	972	1058	1005	757	1176	1219	646	1146
HmN_000031100	201		1	1	0	2	0	0	7	24	4	0	0	0	1	0	0	40	24	53
HmN_000031200	1164		5883	4961	8746	8767	8057	7345	1720	2490	1803	4391	3531	5076	3520	2881	4122	2035	1300	1762
HmN_000031300	2808		507	315	673	645	628	556	880	1222	750	823	579	853	1770	2145	2505	849	427	930
HmN_000031400	1269		1739	1479	2673	2715	2492	2123	630	1069	673	1783	1258	1922	1146	803	1237	1037	624	716
HmN_000031500	1497		1484	1269	2175	2282	2000	1849	465	715	499	805	502	832	1007	863	1280	606	375	554
HmN_000031600	861		7591	6666	10940	11531	10273	9261	1689	2551	1603	2768	1959	2794	3440	2128	3888	2743	1648	2858
HmN_000031700	705		6	6	1	4	9	10	1075	1789	537	0	3	4	8	8	25	3822	2713	2410
HmN_000031800	774		7	5	8	2	9	13	3377	6558	1637	9	6	9	29	18	42	15517	11657	7961
HmN_000031900	651		1888	1554	2619	2879	2670	2370	342	644	465	964	642	1037	717	613	768	605	409	676
HmN_000032000	912		720	612	1066	991	819	783	234	285	198	259	200	275	364	281	397	333	200	269
HmN_000032100	1374		180	190	313	320	210	307	26	51	30	63	20	40	92	35	31	64	46	81
HmN_000032200	2226		1614	1348	2414	2408	2392	2224	302	603	400	838	624	924	847	506	775	483	319	330
HmN_000032300	486		151	113	70	98	47	45	1921	2349	1570	5171	4489	4452	3785	2171	2954	3186	2207	4851
HmN_000032400	507		12	14	6	5	8	4	145	325	305	242	148	258	597	149	114	314	297	410
HmN_000032500	657		0	1	0	2	0	0	14	13	13	10	1	3	14	5	13	31	10	51
HmN_000032600	525		0	3	1	0	2	2	14	32	29	17	1	5	33	19	18	82	33	90
HmN_000032700	984		4026	3310	5737	5973	4919	4441	2618	4280	3047	4323	2820	3685	4700	3278	4887	5054	2967	5367
HmN_000032800	1131		45	58	127	124	83	81	49	54	74	112	64	89	115	61	153	102	84	140
HmN_000032900	672		234	207	364	373	393	397	92	136	113	144	126	177	317	368	289	61	25	21
HmN_000033000	582		471	389	655	730	711	628	211	304	197	355	334	509	405	374	414	190	120	145
HmN_000033100	873		678	585	1015	1154	1068	1012	240	352	242	328	188	321	578	421	548	313	172	245
HmN_000033200	1263		1409	1147	2001	2186	1927	1707	541	688	467	2854	2005	2858	944	776	1073	600	228	368
HmN_000033300	2211		601	505	845	914	778	727	355	592	356	390	279	351	711	598	1138	411	214	261
HmN_000033400	2421		1320	1111	1979	2085	1692	1592	507	948	722	1733	1062	1727	1292	958	1247	838	594	789
HmN_000033500	2508		568	499	778	835	676	687	449	757	426	559	547	503	591	499	870	820	476	711
HmN_000033600	4698		1959	1664	3341	3523	2793	2515	138	219	117	527	442	509	213	150	191	174	62	169
HmN_000033700	4524		1102	1034	1930	2042	1601	1434	1042	1456	1131	736	546	653	3260	3181	3364	939	345	331
HmN_000033800	702		0	0	0	0	0	0	0	0	0	0	0	0	0	0	0	0	0	0
HmN_000033900	1146		482	424	639	755	659	586	257	441	272	517	390	634	439	309	510	355	216	216
HmN_000034000	3747		545	454	673	782	702	600	1111	1608	1104	1259	792	1192	1627	1286	1766	2390	1399	2323
HmN_000034100	342		481	418	721	713	745	628	34	128	113	150	46	119	359	95	72	63	51	68
HmN_000034200	369		0	0	0	0	0	0	2484	7044	3800	9710	3144	5051	8205	1613	1756	2438	1440	1346
HmN_000034300	414		0	0	0	0	0	0	9610	16823	14321	36971	13025	17198	32297	7795	6334	10780	9461	6638
HmN_000034400	207		0	0	0	0	0	0	13	22	10	38	10	31	12	7	12	12	8	9
HmN_000034500	1389		381	327	568	553	526	486	387	891	670	1363	965	1213	964	751	1177	951	467	754
HmN_000034600	483		0	0	0	0	4	0	280	413	381	0	10	4	980	638	564	178	131	24
HmN_000034700	1104		1530	1166	2221	2164	1900	1682	694	975	672	1349	973	1573	1182	1031	1803	1015	604	852
HmN_000034800	276		332	255	497	528	450	419	182	261	217	382	322	421	342	317	489	290	168	256
HmN_000034900	513		262	195	370	395	345	312	187	356	234	394	303	479	359	308	423	328	183	339
HmN_000035000	2607		1748	1573	2832	3032	2479	2106	1415	2050	1332	2023	1358	2122	1824	1268	1836	2849	1569	3759
HmN_000035100	342		14	7	12	37	10	6	5	9	19	10	2	13	45	22	28	4	8	5
HmN_000035200	492		4	0	2	1	4	1	38	86	63	1	2	3	603	199	88	49	9	0
HmN_000035300	1041		0	2	1	0	2	2	357	407	366	19	8	20	998	619	1293	186	81	15
HmN_000035400	1374		374	361	561	594	513	435	211	462	269	720	498	799	438	233	511	355	209	275
HmN_000035500	507		0	0	0	0	0	0	0	0	0	0	0	0	0	0	0	0	0	0
HmN_000035600	837		1	7	4	12	10	10	10	19	11	24	18	22	16	10	24	14	8	9
HmN_000035700	1449		902	685	1375	1353	1161	1039	392	696	360	913	723	956	737	519	1132	456	317	412
HmN_000035800	3033		3745	3379	5943	6386	5554	4936	2735	4186	2075	3649	2627	3499	3441	2630	4468	4997	2834	5232
HmN_000036000	588		3583	3126	4469	4456	2851	2773	130	138	58	352	368	266	147	102	245	139	48	84
HmN_000036200	711		3	5	9	11	14	11	2	2	3	2	5	0	1	2	0	10	4	3
HmN_000036300	822		66	42	105	117	103	72	43	94	59	69	43	47	67	48	84	84	63	75
HmN_000036400	309		61	43	70	86	86	85	121	200	170	14	15	10	493	249	415	197	110	89
HmN_000036500	732		499	361	743	764	620	497	165	196	113	306	214	317	201	205	256	205	119	156
HmN_000036600	1713		1003	959	1665	1701	1356	1288	424	703	393	879	507	685	791	644	956	640	335	619
HmN_000036700	933		862	762	1296	1264	1178	1007	550	1054	692	967	667	1019	1556	914	1162	1003	637	567
HmN_000036800	507		484	313	619	679	678	614	142	238	150	381	234	489	213	152	153	185	123	273
HmN_000036900	1941		18490	15582	27750	28921	26392	24361	4685	7286	4928	10106	7584	11359	8377	6200	8626	5809	3404	5430
HmN_000037000	765		53	36	84	71	69	30	24	47	24	76	58	64	56	48	60	39	21	74
HmN_000037100	542		193	184	296	266	209	193	112	155	143	97	57	95	272	175	250	144	94	91
HmN_000037200	2155		374	316	512	568	501	451	338	528	299	388	229	351	522	381	632	562	311	557
HmN_000037300	1188		1383	1241	1887	1967	1873	1651	323	636	378	452	292	455	613	447	692	737	484	655
HmN_000037400	2796		1453	1317	2380	2498	2050	1770	1539	2333	1388	2419	1920	2503	2525	2810	4360	2207	1029	1781
HmN_000037500	2073		113	87	172	190	152	164	64	95	34	54	48	57	80	91	89	25	7	18
HmN_000037600	600		496	485	810	776	719	655	919	1401	731	1324	935	1372	1282	1102	1676	2034	1245	2049
HmN_000037700	1587		678	592	1078	1004	857	766	423	922	612	1039	703	814	623	430	840	1192	717	1046
HmN_000037800	678		0	0	0	1	0	0	876	1285	1014	0	12	10	2650	2179	3860	695	300	85
HmN_000037900	2607		985	890	1601	1662	1379	1192	544	902	633	1262	801	1140	752	732	1138	1017	642	1118
HmN_000038000	696		445	408	643	726	601	570	188	332	230	292	198	344	477	526	749	266	138	220
HmN_000038100	1971		443	469	746	666	530	540	388	655	386	613	444	595	480	395	533	707	449	701
HmN_000038200	2052		842	674	1235	1310	1097	935	555	1141	777	1171	720	1031	1255	785	1610	772	460	637
HmN_000038300	1254		816	788	1274	1341	1208	955	210	339	265	459	327	489	482	341	475	356	201	372
HmN_000038400	4995		3156	2718	4799	4982	4395	3951	2198	3337	2344	3380	2450	3114	4092	3506	5049	3520	1865	2546
HmN_000038500	1812		3	5	8	6	7	3	295	643	241	82	51	94	85	70	234	308	260	1079
HmN_000038600	705		0	2	3	0	3	0	212	271	159	221	154	211	227	186	279	422	253	524
HmN_000038700	984		202	193	377	427	411	248	123	194	129	202	185	254	195	160	335	208	107	202
HmN_000038900	462		2	0	0	4	1	4	69	134	102	2	1	5	850	223	136	61	40	1
HmN_000039000	1701		1232	1080	1833	1717	1484	1491	529	806	575	1346	896	1451	1165	663	1050	533	331	336
HmN_000039100	6141		769	711	1344	1470	1139	1106	278	520	286	445	296	401	583	540	740	382	175	324
HmN_000039200	1209		2099	1799	2924	2879	2602	2383	939	1699	1076	1577	991	1487	1772	1309	1987	1942	1199	2240
HmN_000039300	2802		653	624	905	1008	791	715	331	578	394	429	260	353	657	648	860	560	290	533
HmN_000039400	2070		521	448	838	859	715	634	205	375	273	668	489	521	471	377	588	339	189	297
HmN_000039520	1992		1748	1618	2441	2707	2246	1911	944	1265	792	1365	1001	1403	1286	1045	1519	1519	885	1449
HmN_000039540	666		1065	916	1612	1529	1367	1263	981	1689	980	1770	1178	1801	2076	1475	2098	2338	1523	2086
HmN_000039560	2058		224	217	365	382	292	268	121	188	104	262	216	246	218	140	231	167	53	137
HmN_000039600	1050		704	668	938	1032	956	781	301	482	263	473	242	490	677	594	575	354	202	409
HmN_000039700	555		0	0	0	0	0	0	0	0	0	0	0	0	0	0	0	0	0	0
HmN_000039800	498		22	14	62	43	48	34	155	402	230	1244	511	797	486	139	160	201	152	247
HmN_000039900	7110		1065	936	1542	1659	1494	1307	932	1413	1041	1442	1106	1247	1382	1255	1935	1893	1063	1703
HmN_000040100	10488		1644	1354	2476	2461	2116	1902	1806	2797	1659	1714	1072	1429	1917	1710	2480	4395	2307	4882
HmN_000040300	4641		898	789	1232	1334	1170	1166	587	963	529	1137	872	1072	782	628	1099	1170	660	1141
HmN_000040400	930		6	6	5	6	8	2	3	7	4	0	1	0	1	0	4	3	6	8
HmN_000040500	912		42	41	63	64	69	63	524	767	611	794	624	861	773	571	957	1053	680	1397
HmN_000040600	294		0	2	0	2	0	2	0	1	0	3	1	0	4	0	0	1	1	1
HmN_000040700	1473		1737	1490	2638	2792	2350	2141	1935	2633	1405	2219	1681	2169	2314	1904	2782	3424	2115	3021
HmN_000040900	2457		406	370	668	635	485	501	159	265	150	286	195	242	383	310	440	269	169	215
HmN_000041200	330		24	12	38	37	29	37	12	11	14	16	9	17	66	36	25	16	6	5
HmN_000041300	525		0	0	0	0	0	0	0	0	0	0	0	0	0	4	0	0	0	0
HmN_000041500	3222		1556	1396	2500	2539	2086	1938	1056	1658	1018	1641	1150	1468	1782	1474	2010	1786	931	1641
HmN_000041600	441		105	77	176	174	161	165	131	239	143	288	232	259	216	206	297	250	157	256
HmN_000041700	1488		4287	3941	7244	7403	6129	5391	879	1325	874	3232	2373	3175	1360	1118	1459	1200	698	1255
HmN_000041800	2349		31	23	44	58	66	57	2	1	4	21	20	28	4	8	8	5	1	4
HmN_000041900	5217		353	341	640	703	594	524	159	261	212	312	280	254	410	309	505	272	116	145
HmN_000042000	4065		1135	983	1569	1632	1333	1312	913	1509	826	1631	1086	1407	1531	1048	1841	1468	788	755
HmN_000042100	1641		902	836	1259	1401	1207	1085	301	435	386	762	573	725	583	463	794	594	360	617
HmN_000042200	2757		1262	1196	2132	2154	1846	1766	257	515	345	1082	834	949	524	378	673	403	277	425
HmN_000042400	918		695	641	1248	1217	1219	1013	4	11	13	132	98	129	7	8	7	10	1	11
HmN_000042600	264		0	0	0	0	0	0	0	0	1	0	0	0	0	0	0	0	0	0
HmN_000042700	1638		1285	1152	1952	2073	1792	1619	885	1502	965	2087	1349	1948	1387	912	1414	2009	1233	2047
HmN_000042800	4968		1515	1371	2657	2862	2521	2181	1013	1762	1063	1988	1222	1883	2540	1949	2731	1414	735	1125
HmN_000042900	1185		13214	11279	20416	21325	19288	16769	1932	3041	2087	5437	3673	5339	3793	2554	3791	3099	1874	2792
HmN_000043000	3456		1408	1317	2397	2547	2017	1855	1264	1831	1186	1788	1209	1729	2266	2477	2856	1720	981	1733
HmN_000043100	1056		45	54	95	91	94	72	231	303	227	58	38	63	737	477	818	156	84	47
HmN_000043200	2604		677	563	1152	1178	916	852	519	742	517	786	493	718	742	729	1066	801	482	812
HmN_000043300	1395		2003	1708	2847	3025	2845	2451	730	1069	752	1337	1006	1292	1664	946	1640	1304	746	1272
HmN_000043400	2187		684	605	1099	1079	988	802	303	640	353	737	491	644	527	352	607	628	271	591
HmN_000043500	324		0	0	0	0	1	0	0	0	0	0	1	0	1	0	0	0	0	0
HmN_000043600	810		1	0	0	0	0	0	0	0	0	22	4	0	2	0	0	2	0	2
HmN_000043700	600		2001	1860	2978	3248	2732	2468	976	1711	1189	1736	1263	2073	2259	1527	1871	1520	911	1652
HmN_000043800	1113		1524	1286	2320	2439	2123	2028	4530	7978	5010	5129	3817	5489	6803	5074	7674	10125	5892	10091
HmN_000043900	1557		16715	14493	24709	25447	22177	19948	6327	10380	6993	14810	10499	14914	12319	9469	14710	10313	5856	9307
HmN_000044000	207		16	13	24	41	30	21	232	728	599	655	204	413	1056	228	428	742	355	697
HmN_000044100	291		900	876	1365	1401	1303	1213	75	139	62	395	323	425	127	144	195	112	48	54
HmN_000044200	213		8	7	5	11	12	8	125	479	297	385	122	201	566	112	228	344	134	218
HmN_000044500	1005		143	122	257	215	209	186	436	695	584	136	115	122	1779	1198	2059	399	124	65
HmN_000044600	3129		1341	1064	1983	2060	1814	1570	861	1319	579	405	334	438	1116	900	1592	1810	903	1606
HmN_000044700	1029		2337	2076	3645	3814	3390	3122	653	1048	796	921	687	1121	1578	1790	2275	768	403	635
HmN_000044800	369		849	664	1142	1071	1107	1070	52	77	50	65	25	53	215	41	56	54	25	40
HmN_000044900	5049		1864	1489	2654	2713	2519	2170	902	1365	954	1432	1125	1746	1601	1676	2313	1708	1040	1651
HmN_000045000	672		369	312	528	631	517	441	403	637	359	527	407	509	428	388	607	827	503	988
HmN_000045100	1998		467	443	775	799	668	647	223	379	257	608	403	723	464	350	620	316	178	245
HmN_000045200	1404		1123	959	1823	1890	1703	1451	469	761	487	1069	777	1154	899	865	1384	608	356	570
HmN_000045300	609		462	412	776	783	684	583	228	364	243	307	148	269	390	305	304	390	228	412
HmN_000045400	936		0	2	4	7	3	2	3	2	4	0	3	1	4	2	5	5	5	2
HmN_000045500	2760		612	575	950	1090	861	791	552	804	556	782	558	754	1313	1424	1824	654	348	455
HmN_000045600	1410		100	99	206	194	163	154	492	809	501	524	361	488	796	495	867	1227	948	954
HmN_000045700	2172		1743	1525	2544	2696	2321	2155	775	1202	700	1205	915	1277	1270	1007	1428	1479	839	1303
HmN_000045800	1347		4399	3669	6678	6733	6087	5455	4228	6108	4140	8627	5690	9020	6492	4679	6867	7281	4942	7414
HmN_000045900	1014		49	29	45	41	48	26	414	617	359	269	122	238	1100	605	876	608	290	246
HmN_000046100	1533		0	0	2	2	2	6	334	630	149	1	0	2	1	3	6	883	563	506
HmN_000046300	987		3	3	11	10	13	8	6	8	4	16	9	18	11	6	5	2	2	3
HmN_000046400	2907		549	437	821	827	815	683	596	841	640	876	765	784	1243	1189	1469	904	455	642
HmN_000046500	1629		342	260	464	627	560	498	251	371	243	474	361	474	575	447	670	298	190	281
HmN_000046600	213		2154	1772	2661	2832	2809	2466	292	414	245	742	480	704	621	307	446	381	240	513
HmN_000046700	783		870	730	1312	1456	1213	1195	271	426	265	507	409	652	525	502	719	448	258	370
HmN_000046800	405		250	221	374	383	300	293	117	152	129	210	155	251	219	253	316	101	54	77
HmN_000046900	552		183	188	247	271	294	291	341	599	234	137	101	211	579	382	315	624	329	610
HmN_000047000	1284		2642	2293	3918	4046	3599	3230	1114	1861	1075	887	670	1031	2073	1706	2926	1742	1074	1542
HmN_000047100	699		492	461	750	711	720	721	334	618	405	664	386	709	833	438	771	594	285	248
HmN_000047200	996		475	379	721	786	677	670	255	356	230	409	317	378	638	600	698	313	212	319
HmN_000047300	2385		0	6	0	0	0	7	2998	6001	1605	3	3	10	610	204	791	4275	2208	6823
HmN_000047400	1998		1082	859	1529	1636	1516	1370	392	536	334	807	597	880	665	602	910	491	305	484
HmN_000047500	1962		264	268	403	442	352	277	388	460	232	379	252	350	505	394	483	514	395	706
HmN_000047600	303		210	145	307	272	261	215	10	19	5	35	29	32	47	10	26	14	9	10
HmN_000047700	3069		727	588	1220	1230	928	980	914	1447	1123	833	632	942	2964	2504	2759	1141	531	682
HmN_000047800	708		839	681	1084	1226	1101	1025	454	757	453	714	587	983	1177	915	1086	532	256	228
HmN_000047900	1542		251	260	389	435	312	278	286	413	337	362	275	332	693	469	781	287	129	163
HmN_000048000	525		22	8	38	24	21	28	32	45	48	29	22	22	67	47	102	23	11	18
HmN_000048100	1197		54	38	73	65	69	63	91	157	140	116	78	98	220	201	369	103	57	70
HmN_000048200	2589		492	498	964	1032	762	779	233	424	220	404	303	414	427	382	566	487	262	578
HmN_000048300	384		0	2	0	0	0	0	0	0	0	0	0	0	0	0	0	0	0	0
HmN_000048400	720		2	0	0	0	0	0	0	0	0	0	0	0	0	2	0	1	0	0
HmN_000048500	663		0	0	0	0	0	0	0	2	0	0	0	0	1	2	0	0	0	0
HmN_000048600	1980		505	400	893	934	761	680	983	1263	965	1626	1008	1455	1351	1043	1501	2020	1163	2082
HmN_000048700	1095		867	758	1185	1195	1083	929	443	547	361	816	609	770	755	701	1005	515	294	485
HmN_000048800	780		318	238	450	495	457	387	105	127	139	253	162	198	341	288	341	118	44	75
HmN_000048900	696		258	232	337	336	286	238	906	1519	1143	963	624	1084	1076	775	996	2046	1211	2073
HmN_000049000	1662		8312	7200	13344	13749	11354	10575	2293	3499	2202	4322	3178	4064	3620	2612	4442	3340	1675	2426
HmN_000049100	582		61	38	65	58	60	48	8	4	0	22	9	15	10	4	7	9	8	14
HmN_000049200	5181		568	493	921	923	737	698	837	1151	819	517	468	542	2541	2940	3097	800	215	272
HmN_000049300	1263		642	552	982	1024	890	704	167	244	154	472	257	410	337	246	406	122	103	125
HmN_000049400	1290		642	551	983	1042	898	827	427	702	450	948	562	916	837	704	1017	666	315	970
HmN_000049500	474		0	0	0	0	0	1	23	37	32	2	0	0	172	85	50	9	3	0
HmN_000049600	273		0	0	0	0	0	0	0	0	0	0	0	0	0	0	0	0	0	0
HmN_000049700	624		0	0	0	0	0	0	0	0	0	0	0	0	0	0	0	0	0	0
HmN_000049800	504		468	393	674	659	640	605	1702	1915	1001	647	641	972	582	595	663	5930	3909	5438
HmN_000049900	507		755	603	1219	1264	1179	1113	290	509	400	637	452	885	788	627	645	395	242	354
HmN_000050000	369		0	0	0	0	0	0	0	0	0	0	0	0	0	0	0	0	0	0
HmN_000050100	330		179	153	249	276	251	208	176	407	193	278	107	175	1030	102	88	143	60	252
HmN_000050200	600		2	4	10	6	8	6	566	785	739	9	16	29	3340	2982	2944	575	215	20
HmN_000050300	2388		806	776	1462	1292	1147	1087	425	751	568	1130	816	1023	883	828	1116	478	251	349
HmN_000050500	2010		93	97	177	176	155	141	145	258	198	177	133	207	717	510	385	170	79	67
HmN_000050600	2751		1021	879	1665	1729	1451	1282	547	1034	507	901	616	918	922	622	1059	962	569	823
HmN_000050800	450		142	109	163	164	167	170	6	14	17	1	0	5	44	15	35	30	7	14
HmN_000050900	948		690	641	1117	1181	965	875	566	730	492	488	295	490	692	576	819	1128	622	1453
HmN_000051000	1716		575	448	839	834	708	755	380	605	518	386	300	396	1372	1323	1407	394	156	236
HmN_000051100	312		193	176	275	298	287	285	12	29	21	35	16	28	83	15	21	11	16	10
HmN_000051200	1110		0	4	5	6	0	1	174	226	213	5	4	4	732	904	804	71	8	2
HmN_000051400	3738		311	251	553	578	473	459	58	84	61	217	222	224	99	69	134	133	69	104
HmN_000051500	798		16	18	28	10	28	15	78	106	49	84	75	148	42	108	204	116	56	92
HmN_000051800	1986		297	287	481	558	479	403	158	323	178	303	219	331	466	368	440	251	89	82
HmN_000051900	2055		2011	1588	3204	3153	2798	2405	955	1636	881	1320	1038	1291	1369	1070	1749	2048	1136	1876
HmN_000052100	666		100	73	94	103	81	108	117	97	115	100	94	131	131	161	134	110	63	99
HmN_000052300	3531		561	483	910	954	847	768	269	444	267	434	390	419	355	345	626	408	229	294
HmN_000052400	4770		436	327	631	652	585	496	586	920	644	920	648	741	1193	1110	1410	1042	524	760
HmN_000052500	408		10463	8862	13503	14461	14252	12762	1419	3296	2958	3996	1298	2294	12713	1277	1380	2293	1720	2253
HmN_000052600	405		6545	5289	8985	9541	10448	9141	524	806	661	1695	616	973	3085	392	440	415	307	404
HmN_000052700	612		445	408	812	746	689	629	163	252	138	349	253	348	325	209	342	203	143	159
HmN_000052900	636		96	92	150	133	136	140	86	130	105	203	192	322	176	130	124	79	69	103
HmN_000053000	2451		3100	2444	4880	5071	4190	3610	1889	2689	1808	3655	2700	3208	3077	2341	3530	3297	1826	2895
HmN_000053100	2997		1357	1261	2222	2366	1991	1753	938	1580	677	999	728	1054	1087	802	1263	1975	1144	1499
HmN_000053300	1095		0	0	0	0	0	0	0	0	0	0	0	0	0	0	0	0	0	0
HmN_000053400	3738		727	620	1142	1242	1112	945	257	430	264	456	322	376	506	387	655	445	199	256
HmN_000053500	5781		1477	1236	2231	2245	2116	1796	872	1251	800	714	512	746	2003	1873	2068	1025	377	608
HmN_000053600	717		664	573	984	1140	899	938	138	234	129	287	194	343	361	296	412	251	133	232
HmN_000053700	2100		242	239	325	360	319	279	202	332	174	358	257	316	307	202	333	328	113	281
HmN_000053800	528		601	510	1016	934	856	756	115	161	120	500	350	534	206	161	235	181	102	243
HmN_000053900	474		0	0	0	0	0	0	0	1	0	0	0	0	1	0	12	0	0	0
HmN_000054000	4263		143	101	226	242	197	178	107	123	84	157	88	124	182	177	300	153	72	72
HmN_000054100	309		0	0	0	2	0	1	0	1	1	1	2	1	4	2	1	2	1	1
HmN_000054200	876		313	299	579	595	518	527	22	79	37	178	114	192	68	44	46	45	22	52
HmN_000054300	576		4	14	17	11	12	2	61	158	119	8	4	2	621	186	102	68	20	74
HmN_000054400	1311		2774	2373	4421	4638	4352	3861	1616	2220	1375	2825	2427	3328	2578	1973	3175	2129	1348	2088
HmN_000054500	360		97	74	144	153	167	122	117	244	241	107	27	76	1070	209	175	95	72	34
HmN_000054600	1095		434	314	551	573	417	459	260	421	224	262	140	207	475	467	555	425	287	464
HmN_000054700	3603		723	605	1176	1073	1037	882	394	583	309	600	423	579	589	445	626	651	320	509
HmN_000054800	3639		898	822	1412	1512	1237	1066	439	734	424	1059	820	827	649	546	832	661	333	630
HmN_000054900	6795		35	28	61	62	32	27	424	786	462	269	166	221	742	584	943	937	448	935
HmN_000055000	486		477	371	535	609	596	503	152	271	209	432	213	430	456	202	261	175	141	191
HmN_000055100	2745		1342	1266	2079	1999	1740	1539	325	489	372	931	820	1011	512	362	589	586	308	605
HmN_000055200	267		23	19	45	36	36	31	16	20	14	26	33	34	59	20	51	12	11	15
HmN_000055300	1668		301	255	522	517	434	442	215	235	246	298	237	318	168	107	150	521	283	695
HmN_000055400	339		0	0	2	3	0	0	40	124	67	0	0	0	343	68	103	79	46	70
HmN_000055500	738		86	92	161	199	217	133	49	50	22	33	37	33	126	65	109	58	10	15
HmN_000055600	3774		2417	2075	3823	3807	3404	3005	1011	1442	968	2369	1807	2151	1470	1388	2515	1351	686	930
HmN_000055700	2322		367	310	604	592	522	509	76	76	108	75	36	42	87	55	93	79	63	210
HmN_000055800	1062		136	96	182	201	156	157	11	14	4	136	94	148	18	16	28	9	9	12
HmN_000055900	1569		622	539	913	864	774	681	345	613	317	558	286	405	427	344	569	639	390	670
HmN_000056000	1779		136	122	233	234	193	182	125	369	203	166	168	177	151	222	326	411	224	366
HmN_000056100	1833		1530	1414	2533	2674	2251	2179	644	989	592	1127	748	1065	1077	769	1389	899	526	725
HmN_000056200	519		359	315	624	664	562	543	247	452	326	406	326	512	566	454	388	353	236	363
HmN_000056300	261		0	0	0	0	0	0	1351	3837	3304	136	73	133	11879	2328	4147	3328	1936	1185
HmN_000056400	258		14	15	26	24	16	18	4392	4746	3694	320	275	414	10053	5865	10009	5586	4143	8721
HmN_000056500	204		1	1	2	0	1	6	1569	2663	1949	294	232	301	5157	3467	5149	3418	2139	2654
HmN_000056600	1143		0	0	2	0	0	0	507	760	633	8	12	21	2882	2760	2192	596	192	15
HmN_000056700	4170		351	321	642	587	563	492	243	387	277	448	341	413	528	452	563	259	164	119
HmN_000056800	222		1058	878	1421	1550	1199	1121	221	406	169	223	119	202	534	197	246	362	194	413
HmN_000056900	879		1609	1288	2434	2425	2141	2014	4168	7184	2727	1573	1113	1701	5376	3071	4073	8790	5340	8784
HmN_000057000	4095		4455	3776	7080	7111	6483	5954	4064	7001	3554	4885	3590	4851	5002	4008	6500	6007	3162	4968
HmN_000057100	6594		586	483	772	765	672	624	878	1724	963	2549	1574	2264	1458	1138	1858	1835	1054	1598
HmN_000057200	738		494	372	822	849	733	625	211	353	289	362	241	311	657	496	592	265	160	224
HmN_000057300	219		0	0	0	2	0	0	0	0	0	0	0	0	0	0	1	0	0	0
HmN_000057400	2697		216	189	435	445	364	332	589	752	684	516	391	651	1184	897	1646	628	382	496
HmN_000057500	513		839	691	1293	1351	1417	1222	227	414	307	673	500	769	669	350	356	274	237	303
HmN_000057600	1320		4031	3607	6133	6752	5510	5113	3089	4653	2755	5892	4199	5273	4993	3669	5517	3533	1954	3542
HmN_000057700	3819		851	782	1378	1409	1195	1037	406	758	432	720	456	644	737	649	1038	683	400	521
HmN_000057800	966		474	465	820	823	765	692	133	327	228	543	324	604	378	330	501	243	170	217
HmN_000057900	369		0	0	0	0	0	0	0	0	0	0	0	0	0	0	0	0	0	0
HmN_000058000	5253		440	412	712	750	552	533	157	302	188	560	373	558	253	197	328	322	141	269
HmN_000058100	243		0	0	0	0	1	0	1	0	1	0	0	0	0	0	0	1	0	0
HmN_000058200	621		10	13	18	9	7	10	18	18	9	15	10	7	27	14	17	31	6	28
HmN_000058300	1056		15	7	34	23	16	11	146	238	191	20	22	30	554	334	504	153	51	54
HmN_000058400	318		0	0	0	0	1	1	10	9	11	2	0	0	54	34	26	8	2	0
HmN_000058500	1065		40	42	75	101	77	65	53	72	86	120	98	102	85	56	94	103	51	74
HmN_000058600	615		0	0	0	0	4	2	54	80	57	2	2	4	313	339	189	48	1	1
HmN_000058700	1623		1214	883	1703	1757	1554	1458	278	442	299	929	629	1063	588	447	744	376	224	327
HmN_000058800	1926		608	550	1124	951	943	893	480	811	544	855	594	790	1067	870	1185	723	411	449
HmN_000058900	435		900	754	1339	1366	1249	1109	378	1145	825	1323	340	655	3462	556	394	747	547	640
HmN_000059000	1503		558	542	847	827	697	682	259	444	310	574	417	592	562	419	678	479	257	340
HmN_000059100	699		277	230	418	365	378	304	441	612	530	222	113	238	1530	1067	1696	384	126	74
HmN_000059200	549		8	1	6	15	6	8	5	2	10	4	2	11	9	11	16	10	5	22
HmN_000059300	714		128	95	239	212	161	143	47	65	48	121	61	86	120	56	73	47	19	56
HmN_000059400	498		0	3	1	10	3	4	0	0	0	6	0	2	0	0	0	0	2	0
HmN_000059500	1443		780	709	1092	1204	1080	889	377	572	418	707	530	788	791	790	1007	419	191	303
HmN_000059600	675		788	699	1126	1337	1158	1052	191	286	255	451	267	368	546	420	537	286	167	237
HmN_000059700	2220		512	444	725	840	627	584	1006	1544	1118	737	483	620	3370	3707	3606	1096	424	536
HmN_000059800	1473		1656	1376	2415	2808	2152	2048	1620	2271	1776	3281	2455	2998	2414	2062	3557	3233	2001	2948
HmN_000059900	276		0	0	0	1	0	0	0	0	0	1	0	0	2	0	0	1	2	1
HmN_000060000	1458		1489	1290	2475	2538	2078	2081	814	1332	957	1926	1410	2016	1778	1160	1684	1537	967	1516
HmN_000060200	1140		1914	1552	2341	2527	2269	1996	1244	2078	1520	5216	3352	5476	2525	1581	2590	1965	1022	1839
HmN_000060300	303		761	643	1048	1060	1170	1019	8	9	2	15	7	16	11	9	15	10	3	3
HmN_000060400	1116		328	268	552	619	480	479	118	271	128	258	163	239	289	240	383	174	115	99
HmN_000060500	1419		282	289	494	503	426	379	126	213	155	210	139	232	316	256	357	173	113	157
HmN_000060600	1284		189	136	196	228	167	149	216	376	196	428	203	411	460	319	450	368	158	263
HmN_000060700	2919		1124	962	1404	1326	1340	1138	5425	9477	5534	9876	6087	8383	8774	6494	9473	10366	6615	8883
HmN_000060800	240		0	0	0	2	0	2	1	5	4	1	0	0	11	14	17	0	0	1
HmN_000060900	897		676	540	905	1002	845	754	254	444	321	524	281	545	660	549	773	438	205	461
HmN_000061000	1896		345	257	526	488	433	446	80	153	76	221	138	197	53	24	105	73	51	183
HmN_000061100	330		0	2	2	0	0	0	0	0	2	0	2	4	0	1	0	0	0	0
HmN_000061200	768		244	226	440	377	401	405	257	569	257	470	300	555	494	362	518	477	291	402
HmN_000061300	3132		27	26	59	60	32	41	492	1032	956	939	568	1023	1181	802	1293	1232	765	1237
HmN_000061400	735		5083	4297	7079	7229	6568	5976	1674	2547	1862	2861	1697	2874	2584	2232	3078	2544	1724	3008
HmN_000061500	519		18	17	40	32	27	40	33	58	39	43	51	41	110	62	60	75	25	27
HmN_000061600	3606		317	306	476	528	433	418	389	646	386	652	326	523	844	825	1105	581	284	263
HmN_000061700	1914		534	458	875	946	786	656	255	425	243	405	336	399	533	354	599	348	218	333
HmN_000061800	207		510	426	352	359	212	201	4	3	8	14	10	13	10	6	9	9	6	9
HmN_000061900	2736		1600	1411	2345	2267	1951	1724	412	694	495	842	748	654	596	686	1075	663	336	623
HmN_000062000	990		678	461	941	1057	908	812	220	394	230	571	423	624	462	370	560	219	123	246
HmN_000062100	6753		270	227	470	507	390	393	821	1271	1175	164	136	180	3237	2144	3496	691	289	82
HmN_000062200	1266		599	510	901	905	900	687	330	512	386	361	256	376	852	770	822	536	319	452
HmN_000062300	969		713	588	1153	1128	1095	1037	592	1021	737	953	651	1076	1888	1711	1959	821	387	650
HmN_000062400	4548		387	341	636	712	534	497	73	146	71	326	223	282	95	87	113	141	105	214
HmN_000062500	435		529	432	835	817	772	689	65	142	85	94	39	116	320	188	149	90	50	72
HmN_000062600	1482		429	392	617	656	521	501	348	539	336	503	362	545	446	416	611	775	484	687
HmN_000062700	1587		105	95	163	157	112	122	5	17	6	39	28	31	18	10	16	17	9	21
HmN_000062800	1527		1145	1033	1813	1750	1595	1469	703	1243	899	1059	717	927	1505	1266	1699	1156	643	1313
HmN_000062900	1188		1929	1767	3006	3103	2655	2422	832	1408	873	2184	1462	2028	1264	1074	1946	1033	583	959
HmN_000063000	1089		418	335	607	638	498	474	427	680	583	779	553	783	771	639	1004	956	567	814
HmN_000063100	1017		12455	10990	17615	18642	15142	13741	2074	3131	2269	4970	3591	5135	4098	2903	5115	2110	1305	2366
HmN_000063200	3816		595	552	1039	1079	874	771	374	515	299	753	503	600	709	676	834	449	255	317
HmN_000063300	807		2400	2196	3404	3583	3171	2746	2023	3300	2416	6682	4709	8136	4146	3073	5484	1808	1289	1683
HmN_000063350	1083		797	651	1334	1324	1138	1023	298	409	296	718	473	863	542	439	735	366	257	339
HmN_000063400	2427		1288	1082	1947	2155	1726	1524	1155	1810	1107	1803	1283	1822	2104	2201	2910	1798	867	1604
HmN_000063500	2268		0	0	3	2	4	0	243	330	305	1	9	7	1103	1266	1198	112	16	1
HmN_000063600	4992		700	547	1031	1079	968	910	965	1350	1099	792	572	726	3371	3498	3330	1105	421	624
HmN_000063700	2988		464	327	807	848	777	662	170	298	160	305	232	330	299	315	471	165	53	133
HmN_000063800	1128		49	47	66	55	67	65	153	205	185	51	38	60	551	571	800	98	30	12
HmN_000063900	1272		406	383	621	682	590	550	142	167	116	254	199	320	289	354	456	107	31	36
HmN_000064000	1329		661	489	894	1072	918	809	317	597	364	721	494	704	823	595	839	428	295	452
HmN_000064100	1254		1095	920	1625	1675	1626	1442	1034	1610	1244	1657	1176	1932	2829	2400	3424	1265	677	1146
HmN_000064200	891		1021	810	1457	1580	1377	1143	183	317	225	537	381	556	467	352	556	296	164	230
HmN_000064300	1542		786	667	1180	1347	1040	1004	163	298	196	489	371	436	316	259	366	193	102	130
HmN_000064400	582		954	861	1381	1536	1608	1332	391	570	379	865	893	1284	672	767	912	647	345	736
HmN_000064500	4689		449	409	804	865	720	588	48	92	78	393	315	329	137	118	171	98	54	92
HmN_000064600	3330		1047	947	1740	1754	1400	1297	443	812	525	884	636	701	778	848	1145	882	486	801
HmN_000064700	1161		129	96	184	222	180	120	0	0	0	4	0	2	0	0	2	1	1	0
HmN_000064800	732		101	59	118	118	90	94	2	28	15	134	138	147	37	16	51	14	5	7
HmN_000064900	942		0	2	3	2	2	6	2	5	1	2	0	0	13	1	10	9	1	0
HmN_000065000	1875		384	383	686	645	534	471	141	225	155	319	161	276	249	189	342	203	120	198
HmN_000065100	705		515	440	858	728	709	618	246	438	303	350	203	382	691	516	722	455	259	375
HmN_000065200	396		555	523	790	840	814	757	123	233	188	334	288	407	379	249	326	196	121	180
HmN_000065300	2172		296	252	426	450	406	331	605	1187	696	1317	864	1215	900	809	1147	1640	826	1414
HmN_000065400	729		1539	1321	2163	2379	2106	1854	519	767	473	884	642	856	1007	744	878	607	415	752
HmN_000065500	1296		7103	6070	9871	10180	8758	8037	4780	7411	4219	6651	4709	6996	10009	6624	8791	9906	6201	5454
HmN_000065600	1284		489	424	741	836	695	623	295	504	298	348	253	335	599	415	601	447	232	325
HmN_000065700	1698		536	516	758	821	734	615	503	873	515	900	570	919	785	477	865	845	542	1014
HmN_000065800	2040		1342	1124	2082	2227	1870	1618	897	1286	951	1089	817	1043	2170	2060	2484	1156	546	732
HmN_000065900	6087		5733	4967	8805	9244	8035	7381	3193	4846	2703	5166	3871	5251	4755	4010	6048	4921	2745	4059
HmN_000066000	1377		3296	2998	5459	5432	4653	4179	2867	3902	2742	4166	3075	4901	5161	4672	6606	4408	2525	4183
HmN_000066100	1224		988	940	1719	1728	1503	1217	1183	1803	1143	1554	1023	1394	2660	2374	2825	1587	889	1505
HmN_000066200	1383		883	725	1433	1505	1345	1129	380	551	411	674	463	563	744	514	773	734	384	662
HmN_000066300	1167		539	439	799	900	681	631	265	413	262	313	260	301	451	403	541	483	221	415
HmN_000066400	3012		551	477	989	978	823	719	360	485	307	655	515	600	589	479	702	506	288	383
HmN_000066500	234		0	0	0	0	0	0	0	0	0	0	0	0	0	0	0	0	0	0
HmN_000066600	654		2	2	3	4	3	3	151	269	228	7	8	11	592	486	758	108	65	19
HmN_000066700	933		44	36	65	63	53	48	22	55	44	46	18	54	88	43	111	36	38	20
HmN_000066800	468		0	0	0	0	2	0	0	0	0	0	0	0	0	0	0	0	0	0
HmN_000066900	1521		1002	845	1564	1667	1362	1337	585	907	384	651	467	723	525	359	613	936	648	921
HmN_000067000	447		0	0	1	0	0	0	0	0	0	0	0	0	0	2	0	0	0	0
HmN_000067100	3123		319	239	428	493	388	327	88	80	75	220	177	146	118	111	136	67	33	51
HmN_000067200	24246		12532	10819	19064	19553	16261	14615	19251	28667	22513	29571	20700	27592	33974	25626	43086	29999	18401	22427
HmN_000067300	717		388	336	624	542	614	585	110	164	88	213	137	223	197	190	238	148	73	72
HmN_000067400	3348		1603	1432	2598	2687	2205	2050	858	1365	879	1364	908	1236	1961	1860	2185	1255	678	980
HmN_000067500	2178		114	121	230	220	195	166	65	80	35	163	160	199	78	29	34	60	36	90
HmN_000067600	2451		940	853	1375	1433	1336	1223	1066	1595	944	1434	1034	1441	1559	1131	1909	2072	1228	1938
HmN_000067700	1650		6622	5743	9844	9992	8340	7827	2688	3900	2592	4841	3607	4860	4578	3594	6225	2850	1586	2372
HmN_000067900	609		251	227	376	398	430	368	1299	1970	1316	2446	1678	2970	2165	1698	2648	2825	1887	3411
HmN_000068000	573		1402	1292	2141	2190	2027	1958	2834	3742	3157	5234	3984	6828	5222	3657	5008	4778	3354	4446
HmN_000068100	870		2	0	0	0	3	0	1105	1995	683	6	4	16	1535	554	476	953	313	1148
HmN_000068200	4671		1986	1860	3086	3224	2765	2460	1223	1721	1131	1962	1279	1846	1968	1664	2507	2097	1186	1672
HmN_000068300	507		761	661	1105	1143	1153	955	75	149	127	306	95	164	587	80	60	78	71	74
HmN_000068400	807		979	867	1431	1459	1284	1200	651	985	710	1290	843	1334	1200	761	1197	1164	676	1414
HmN_000068500	1236		1955	1795	3197	3223	2764	2673	757	1166	774	1594	1206	1491	1552	1175	1813	1294	710	1145
HmN_000068600	1584		357	293	599	572	526	475	119	188	168	695	570	726	244	149	283	193	83	180
HmN_000068700	354		5408	4840	6842	7315	6419	6051	125	290	262	472	196	332	1162	139	161	148	116	128
HmN_000068800	4761		654	635	1093	1073	923	868	469	798	604	1066	709	949	1067	836	1203	965	412	735
HmN_000068900	3594		3272	2943	5387	5453	4738	4256	1909	2792	1726	2534	2124	3186	2573	2769	4791	3585	1869	3628
HmN_000069000	231		102	86	109	144	144	142	3	8	4	11	4	5	3	0	0	5	6	8
HmN_000069100	186		325	271	395	344	341	329	2	2	1	4	6	8	6	2	3	1	2	1
HmN_000069200	1401		1323	1139	1971	2138	1691	1493	304	614	341	937	598	911	657	529	675	502	303	616
HmN_000069300	1005		3543	3065	4680	4755	4467	4159	2147	3731	2389	4666	2805	4629	4621	2754	4354	4609	3035	4888
HmN_000069400	777		6	2	10	4	0	4	0	9	0	0	0	3	2	6	0	12	17	16
HmN_000069500	357		393	308	507	535	508	505	37	111	106	202	65	197	329	68	70	62	38	28
HmN_000069600	1212		344	253	584	915	335	292	47	23	20	87	29	42	26	27	33	21	7	26
HmN_000069700	2274		227	191	376	400	391	313	173	248	156	319	241	322	295	296	422	216	123	202
HmN_000069800	522		118	107	197	227	155	142	445	576	449	815	701	1177	518	461	612	813	599	822
HmN_000069900	462		2741	2366	6921	3877	3573	3298	516	1455	1143	3061	893	1743	4432	990	571	708	671	905
HmN_000070000	2109		1828	1671	2943	2910	2523	2234	593	936	660	1187	828	1119	1017	875	1337	1067	542	1013
HmN_000070100	3726		328	282	535	482	425	387	207	325	175	332	253	277	279	253	392	420	221	288
HmN_000070200	2808		2461	1996	3673	3852	3109	2764	1369	2222	1362	2579	1814	2291	2102	1724	2954	2081	1198	1752
HmN_000070300	3672		1495	1342	2413	2494	2289	2067	927	1543	1064	1644	1168	1753	2047	1730	2398	1278	729	900
HmN_000070400	363		14484	12686	18870	19603	19891	17834	96	308	189	613	208	329	812	128	189	177	58	113
HmN_000070500	741		38037	32735	56727	58895	50966	47191	15855	24780	16475	29269	22086	29038	27479	20152	29078	24709	15622	23878
HmN_000070600	1104		452	372	602	644	610	549	219	322	274	427	355	492	675	628	763	285	99	216
HmN_000070700	390		0	0	0	0	0	1	0	4	0	1	0	0	0	1	1	1	0	3
HmN_000070800	1137		348	295	620	675	729	636	241	484	278	766	527	878	649	472	621	294	211	214
HmN_000070900	1314		666	550	1053	1016	910	811	411	582	462	730	486	798	764	581	928	601	377	626
HmN_000071000	1443		2363	1899	3440	3474	2762	2525	2739	3264	2048	3533	2681	3592	3117	2690	4246	4451	2675	4486
HmN_000071100	327		3	1	2	1	0	1	12198	36200	11016	27	132	181	27905	2611	2436	42750	29760	38251
HmN_000071200	438		171	162	195	276	265	198	173	333	282	390	296	549	463	412	352	316	305	432
HmN_000071300	1605		483	442	690	704	573	551	150	240	120	403	288	403	228	157	319	185	113	175
HmN_000071400	636		1037	854	1602	1563	1384	1320	534	775	602	833	542	818	857	748	1076	951	587	1049
HmN_000071500	1290		539	456	827	946	721	675	114	262	122	445	325	516	252	142	256	199	77	169
HmN_000071600	1431		87	77	120	157	86	70	15	11	12	43	28	53	15	14	21	8	11	9
HmN_000071700	1419		23	18	40	31	30	29	16	17	4	4	9	11	33	9	31	13	9	11
HmN_000071800	1905		0	0	0	0	0	2	142	215	150	1	6	6	657	722	675	79	8	2
HmN_000071900	1857		0	0	0	0	2	5	222	283	278	0	2	8	1046	1186	898	176	22	4
HmN_000072000	1998		327	244	395	519	371	368	92	124	90	382	332	435	135	112	146	125	60	96
HmN_000072100	1560		2	10	9	6	6	6	669	1287	1174	18	16	18	1991	2144	3915	169	70	35
HmN_000072200	741		1071	925	1386	1549	1288	1250	827	1365	1004	962	528	1014	1499	1248	1466	1476	880	1767
HmN_000072300	1854		4373	3633	6012	6253	5117	4615	2896	4104	2753	4354	3169	4219	4039	3260	4891	5225	3101	5418
HmN_000072400	4248		423	407	688	624	588	479	2078	3299	2650	3002	1808	2578	3223	2800	4342	5471	3086	5583
HmN_000072500	834		93	76	119	145	112	97	51	123	99	172	127	211	111	127	165	117	79	110
HmN_000072600	1848		39	25	38	47	22	25	1678	2360	751	4	10	4	684	389	622	4594	3321	5382
HmN_000072700	1122		2338	2100	3512	3531	3092	2916	930	1462	963	1568	954	1510	1355	1117	1663	1629	980	1613
HmN_000072750	279		8	2	8	16	8	5	3	11	13	38	5	29	30	2	4	2	10	9
HmN_000072800	1008		472	477	798	849	708	591	538	763	567	685	463	642	1068	853	1129	893	494	1076
HmN_000073000	2973		2619	2242	3842	3934	3139	2919	3078	5028	2727	3469	2554	2793	3193	2656	4546	5596	3132	4269
HmN_000073100	4332		1229	1105	1775	1816	1498	1385	734	1140	826	1127	825	1023	1019	741	1189	1605	866	1493
HmN_000073200	759		715	699	1152	1210	1137	1049	477	766	487	815	558	894	942	689	993	813	510	903
HmN_000073300	312		0	0	1	2	0	2	31	43	43	0	2	0	236	46	51	17	11	1
HmN_000073400	696		362	333	614	595	543	505	173	347	274	224	184	276	745	630	765	223	135	194
HmN_000073500	3021		896	734	1413	1319	1096	1145	649	932	628	860	697	958	848	659	960	1338	729	1681
HmN_000073600	714		481	361	658	731	765	679	152	186	182	367	256	420	345	261	379	223	124	182
HmN_000073700	2571		728	646	1132	1175	959	951	353	445	393	598	496	571	803	643	1027	544	249	429
HmN_000073800	1239		237	182	307	359	318	294	34	92	58	138	100	164	96	76	102	67	32	60
HmN_000073900	438		1320	1136	2029	1998	1954	1802	1947	2794	2573	4409	2313	5078	4310	2771	1964	3649	3257	4223
HmN_000074000	4563		775	618	1188	1238	1049	924	359	580	447	646	489	578	793	791	1003	530	288	358
HmN_000074100	648		94	96	91	119	83	105	748	1909	1494	2726	895	1789	4465	677	768	1312	972	1345
HmN_000074200	924		1	1	0	0	2	0	3	0	4	2	2	4	0	2	5	5	5	1
HmN_000074300	858		83	72	131	90	115	76	0	0	0	40	28	58	2	0	5	0	0	0
HmN_000074500	4215		648	586	888	1076	790	758	231	373	234	517	406	432	470	368	494	368	201	248
HmN_000074600	1170		356	323	579	551	526	471	454	693	411	423	267	403	593	474	659	1090	665	1171
HmN_000074700	4170		326	270	589	552	480	384	329	535	270	562	483	606	555	437	705	545	321	360
HmN_000074800	873		598	481	832	956	848	655	313	434	357	342	248	376	1072	970	986	298	86	157
HmN_000074900	888		681	594	867	928	776	698	265	421	319	575	440	657	490	342	557	481	276	495
HmN_000075000	408		3	3	11	13	15	6	30	76	31	98	74	107	26	22	31	56	39	83
HmN_000075100	1203		265	221	312	358	312	238	2287	2827	2119	3659	2590	3859	3335	2520	3654	3657	2469	5103
HmN_000075200	699		316	279	451	441	441	410	50	87	62	124	81	138	122	83	107	54	37	40
HmN_000075300	906		393	335	512	542	469	450	285	491	345	545	404	772	752	613	862	379	250	365
HmN_000075400	6585		2658	2322	4260	4590	3718	3440	859	1390	861	1949	1466	1901	1363	1322	1974	1235	613	1053
HmN_000075500	1401		1216	978	1786	1814	1639	1373	491	690	507	1071	716	1035	950	930	1250	581	299	487
HmN_000075600	435		3	3	5	23	24	3	0	1	23	5	2	28	0	2	6	0	0	0
HmN_000075700	666		11	111	4	93	70	802	2	1	2	9	3	0	1	7	1	0	0	4
HmN_000075800	990		0	0	0	2	1	3	0	0	0	0	0	0	2	0	2	0	0	0
HmN_000075900	1173		0	0	0	0	2	0	671	923	753	4	7	7	2132	1745	2610	525	284	65
HmN_000076000	2058		1255	1113	2065	1977	1746	1610	535	1024	704	1749	1213	1443	999	698	1048	765	354	657
HmN_000076100	219		29	20	41	43	48	39	26	50	48	76	70	79	44	41	68	37	16	30
HmN_000076200	2034		0	0	0	2	1	0	975	1308	1104	4	23	22	4735	4144	3839	846	272	26
HmN_000076300	723		0	0	362	112	0	0	0	0	0	1	0	0	0	0	63	0	0	0
HmN_000076400	1515		870	728	1408	1454	1305	1083	1047	1688	987	1252	916	1186	2039	1713	2275	1921	1047	1776
HmN_000076500	2526		176	170	230	296	230	195	154	274	86	162	115	120	149	97	103	228	103	249
HmN_000076600	2016		985	957	1749	1756	1422	1205	626	1071	613	848	602	873	1164	1236	1718	1021	534	801
HmN_000076700	2571		440	389	664	708	635	624	3100	4507	2498	1829	1494	1609	3352	4894	7291	5215	2578	5085
HmN_000076800	2850		1124	995	1702	1850	1481	1406	421	689	457	693	489	693	751	703	903	739	400	632
HmN_000076900	1872		981	864	1429	1564	1369	1130	288	487	311	754	502	816	509	369	742	438	277	353
HmN_000077000	879		0	0	0	0	0	0	0	0	0	0	0	0	0	0	0	0	0	0
HmN_000077100	2457		0	0	0	3	0	0	62	109	38	0	0	0	111	117	174	104	83	58
HmN_000077200	1410		3194	2893	4886	4950	4257	3722	483	839	544	1024	593	773	956	672	849	796	520	779
HmN_000077300	1482		2277	1962	3741	3892	3328	2989	892	1189	999	3333	2637	3556	1356	1400	2085	1109	562	1081
HmN_000077400	372		0	0	0	2	0	0	60	97	110	0	4	4	812	310	130	68	14	0
HmN_000077500	1524		206	207	323	319	330	247	637	1230	575	474	368	607	995	713	1054	1036	640	1178
HmN_000077600	1506		18	12	30	31	26	23	298	460	225	8	4	14	654	400	614	387	184	405
HmN_000077700	777		36214	31408	52245	55075	51087	46746	6401	10208	7516	15206	10708	16015	13809	8414	12822	8771	4943	5462
HmN_000077800	1581		713	637	1092	1083	951	860	399	593	448	756	435	648	862	740	1072	637	445	630
HmN_000077900	762		7	7	7	2	4	3	1	1	1	5	4	6	4	0	2	0	0	3
HmN_000078000	639		587	518	847	903	841	780	139	166	125	337	234	355	254	239	305	174	96	139
HmN_000078100	1200		0	0	0	0	2	0	241	296	340	2	8	9	1029	1110	1113	212	45	0
HmN_000078200	1917		399	329	661	629	424	446	69	89	41	244	180	220	72	64	77	70	32	116
HmN_000078300	672		591	488	818	813	810	703	201	301	181	453	349	451	405	404	505	171	98	221
HmN_000078400	285		0	0	0	0	1	0	0	0	0	0	0	0	0	0	0	0	0	0
HmN_000078500	2241		1597	1364	2438	2516	2141	1911	851	1273	953	1428	1054	1436	2525	2730	2940	996	502	400
HmN_000078600	870		168	155	292	319	260	237	58	94	61	139	102	141	104	73	155	75	40	41
HmN_000078700	3297		487	513	878	843	758	710	271	299	186	330	202	288	261	140	226	380	230	663
HmN_000078800	603		639	473	691	747	695	685	207	430	325	385	209	440	1042	349	265	295	153	131
HmN_000078900	423		1335	1156	2011	2008	2003	1734	254	530	335	1103	413	785	1147	373	298	244	168	234
HmN_000079000	1515		62	44	80	86	56	57	61	133	73	180	93	132	119	67	122	154	65	178
HmN_000079100	2652		672	570	1031	1033	966	830	546	764	379	459	407	349	609	526	1069	1020	492	814
HmN_000079200	483		2	2	0	2	0	1	0	0	0	1	0	0	0	1	0	0	0	0
HmN_000079300	354		0	0	0	0	2	1	4	6	8	0	0	0	14	18	25	1	1	0
HmN_000079400	237		0	0	0	0	2	0	2	5	2	0	0	0	12	8	6	0	1	0
HmN_000079500	441		205	205	282	267	273	237	18	56	40	78	22	53	103	18	35	13	7	13
HmN_000079600	2127		171	169	362	305	270	237	351	467	317	148	108	189	875	575	1035	251	115	55
HmN_000079700	921		299	226	382	473	385	302	145	176	122	119	95	133	336	321	342	185	103	171
HmN_000079800	1596		24	16	53	51	46	22	900	1208	1133	5	14	27	4443	3794	3551	831	162	26
HmN_000079900	2760		49	52	121	104	76	99	63	81	42	101	67	56	101	80	94	60	30	80
HmN_000080000	2646		7608	6480	13068	13242	11301	10348	2351	3799	2526	5221	3896	4924	4739	3443	5968	3229	1876	2727
HmN_000080100	1092		1073	945	1447	1551	1418	1331	195	326	239	526	353	514	402	228	316	399	261	373
HmN_000080200	3453		2547	2145	3927	4143	3777	3182	1901	3042	1737	4368	2363	3301	2714	2072	3423	3932	1952	3657
HmN_000080300	2580		253	252	427	439	401	361	621	821	382	8	7	15	1137	1007	955	791	261	589
HmN_000080400	561		3225	2779	4297	4530	4446	3996	1010	2152	1256	3293	1564	2185	3427	1039	1005	1357	1038	1549
HmN_000080500	633		681	627	1025	1007	1042	921	160	316	251	514	346	569	618	234	299	195	152	265
HmN_000080600	3516		517	475	853	838	714	617	115	177	124	703	556	580	171	177	308	167	82	112
HmN_000080700	1008		47	45	57	90	48	58	67	182	74	727	519	810	159	95	189	17	19	11
HmN_000080800	1161		3	4	0	2	0	2	1	0	1	0	0	0	0	0	0	0	2	0
HmN_000080900	1245		1110	942	1778	1866	1668	1340	296	453	340	747	589	894	554	426	696	361	244	353
HmN_000081000	270		460	450	778	773	776	635	28	60	29	105	24	49	160	20	41	35	24	37
HmN_000081100	768		425	352	646	628	614	566	176	297	201	173	176	253	631	719	891	262	61	132
HmN_000081200	1278		57	50	94	91	90	83	7	5	2	8	9	11	7	11	10	9	3	9
HmN_000081300	5811		1037	897	1543	1592	1449	1268	1034	1815	1006	1413	1067	1266	1371	1265	1942	2425	1509	2396
HmN_000081400	1137		348	305	565	565	452	427	188	271	196	455	314	423	395	275	405	260	186	264
HmN_000081500	1182		566	445	759	853	659	643	2676	4134	1702	1358	820	1286	1724	1402	2317	10954	6328	7186
HmN_000081600	2649		3392	2886	5232	5108	4645	4034	1636	2344	1585	2902	2205	3228	2574	2411	4054	2040	1190	1993
HmN_000081900	1731		0	0	0	2	0	3	0	0	0	0	0	0	4	0	0	0	0	0
HmN_000082000	432		0	0	0	0	1	0	0	0	0	0	0	0	4	0	0	0	0	1
HmN_000082100	621		1765	1517	2635	2754	2537	2311	515	713	512	1328	946	1500	971	918	1194	708	353	570
HmN_000082200	846		1	0	1	4	2	7	161	276	233	7	5	10	885	664	664	130	33	6
HmN_000082300	1611		830	696	1268	1301	1050	950	553	955	553	978	605	885	872	650	1007	1092	623	1131
HmN_000082400	225		0	0	0	0	0	0	0	0	0	0	0	0	0	0	0	0	0	0
HmN_000082500	786		8640	7124	12389	12916	12937	12032	5151	10820	6156	6403	4115	7466	10261	7075	12095	10197	5698	10645
HmN_000082600	663		3503	3118	5190	5402	5270	4703	5819	7840	5528	3303	2223	4182	7068	5528	7939	14494	8874	15238
HmN_000082700	12264		450	416	713	753	586	513	435	668	619	281	160	268	1010	820	1603	380	169	222
HmN_000082800	12537		1182	952	1722	1775	1491	1352	408	548	403	718	474	749	494	377	659	712	383	553
HmN_000082900	1248		67	45	132	114	129	72	14	65	27	63	15	42	90	22	26	30	32	40
HmN_000083000	672		4921	4404	7108	7246	6242	5400	2800	4601	2827	5255	3816	6219	4262	3231	5206	5314	3187	5985
HmN_000083100	549		2	0	2	3	1	12	678	978	419	3	8	8	1271	707	827	734	433	948
HmN_000083200	528		7	7	9	9	3	5	42	67	52	1	2	0	128	104	162	23	14	1
HmN_000083300	579		315	249	555	555	452	358	95	150	120	284	201	294	143	127	235	160	105	158
HmN_000083400	2178		731	663	1328	1255	998	870	519	821	496	1042	667	1015	837	658	1149	643	352	580
HmN_000083500	12507		234	206	384	406	337	272	328	541	373	283	172	249	855	723	1298	284	111	73
HmN_000083600	2154		566	509	996	1090	975	840	529	898	493	836	683	887	1043	901	1284	807	385	620
HmN_000083700	567		921	798	1488	1457	1332	1242	393	680	453	1009	638	1085	848	679	885	466	332	505
HmN_000083800	1107		580	563	933	976	776	758	202	253	176	571	418	485	321	268	473	342	179	377
HmN_000083900	1473		680	520	904	919	747	661	345	554	299	481	395	542	618	400	832	552	250	475
HmN_000084000	2964		953	653	1409	1404	1227	1133	957	1529	888	677	538	724	1730	1290	2205	1584	741	1161
HmN_000084100	2034		182	135	229	236	181	163	78	162	65	99	50	118	31	27	47	186	127	120
HmN_000084200	1743		10273	9001	15835	17049	13772	12448	12000	19806	9462	11186	8704	11157	17562	15117	23695	16457	8187	14614
HmN_000084300	1404		822	738	1174	1190	1030	922	327	480	306	689	492	671	516	451	736	449	192	311
HmN_000084400	420		20	20	48	43	32	56	2	13	3	50	8	20	23	7	3	0	5	2
HmN_000084500	495		2795	2380	3870	3975	4077	3736	194	445	302	676	215	361	1744	204	257	298	183	247
HmN_000084600	2988		1328	1110	1747	1977	1586	1475	3699	6398	3436	4844	3743	4000	4624	3850	5969	7751	4276	6080
HmN_000084700	948		0	0	0	0	0	2	563	693	624	2	12	20	2989	3087	2373	399	45	16
HmN_000084800	591		2294	1936	3146	3364	3201	2810	913	1195	809	1794	1439	2278	1311	1387	1782	980	627	1026
HmN_000084900	1149		486	464	771	834	758	691	245	412	286	413	345	530	505	504	679	319	210	231
HmN_000085000	4329		874	709	1320	1278	1214	1064	604	957	600	1124	727	1033	1026	807	1231	816	475	822
HmN_000085100	2391		3053	2664	4632	4694	3901	3402	2052	3254	2129	3111	2272	2991	3137	2781	4539	3767	2123	3951
HmN_000085200	1944		222	221	340	326	239	234	176	263	155	283	161	289	236	170	301	317	192	322
HmN_000085300	594		1835	1649	2676	2782	2683	2248	1559	2078	1409	3483	3477	5439	2411	2612	3419	1727	1046	1857
HmN_000085400	930		2	0	0	0	0	1	34	68	36	81	49	68	75	40	108	89	34	114
HmN_000085500	1878		676	655	1075	1105	1091	929	463	750	423	1011	573	879	935	679	985	689	455	647
HmN_000085600	999		6	4	8	2	7	2	35	37	32	65	67	102	60	32	52	62	27	51
HmN_000085700	1500		3813	3070	5421	5529	4543	4403	894	1552	1033	1701	1286	1920	1939	1587	2203	1393	787	1051
HmN_000085800	645		1658	1581	2275	2532	2345	1932	1130	1587	1190	1766	1328	2069	2405	1864	3280	1431	850	1144
HmN_000085900	1089		169	136	246	247	231	216	18	40	13	51	20	40	81	27	26	31	17	16
HmN_000086000	720		2	3	0	5	64	45	3	0	0	0	0	1	0	0	0	9	2	4
HmN_000086100	1590		0	2	8	1	6	4	0	1	2	0	0	0	0	0	0	0	0	0
HmN_000086200	1569		25	19	36	34	36	23	14	18	22	10	16	8	36	32	33	13	4	1
HmN_000086300	378		86	66	62	83	87	87	124	239	143	62	22	39	786	128	170	99	18	19
HmN_000086400	552		0	0	0	0	0	1	12	20	15	0	2	0	65	66	64	5	0	0
HmN_000086500	252		0	0	1	1	0	0	1	0	0	0	0	0	1	0	5	1	2	0
HmN_000086600	1878		1226	1178	2168	2113	1740	1635	2255	3057	2163	2134	1450	1748	3630	3071	5196	3486	1852	2998
HmN_000086700	396		1683	1521	2545	2522	2270	2023	1911	3243	2678	3595	2814	5761	4311	2995	4279	3360	2380	3938
HmN_000086800	1023		0	0	0	0	0	1	2	5	2	0	0	1	7	3	8	0	0	1
HmN_000086900	2847		120	133	190	198	205	153	376	537	501	739	481	664	601	592	884	936	624	1019
HmN_000087000	600		689	543	969	1052	1057	899	266	475	318	622	404	674	756	380	556	302	178	230
HmN_000087100	2931		849	794	1394	1518	1246	1155	463	664	377	689	490	594	840	876	1184	516	230	410
HmN_000087200	2673		597	456	858	902	813	674	367	711	372	910	590	835	726	540	947	726	392	571
HmN_000087300	1464		46	37	51	52	55	53	50	149	99	224	154	287	177	106	194	85	47	51
HmN_000087400	1566		229	233	350	369	294	283	86	178	111	201	153	181	190	165	234	171	94	105
HmN_000087500	2145		130	137	206	230	205	146	326	436	217	218	188	201	233	171	322	780	433	834
HmN_000087600	717		0	0	0	0	0	0	424	583	508	2	14	10	1596	1181	1908	310	135	52
HmN_000087700	774		501	452	784	873	740	701	728	1068	499	312	281	380	1084	801	1230	1015	594	1127
HmN_000087800	2925		270	251	375	405	354	344	651	1304	652	1044	717	979	886	665	1050	1622	981	1529
HmN_000087900	1698		649	605	1055	1039	813	753	149	213	131	251	193	253	292	233	264	224	150	266
HmN_000088000	1080		11	11	17	10	4	7	472	619	418	3	5	0	1083	1234	1174	473	249	323
HmN_000088100	687		3	2	1	4	5	3	0	0	0	0	0	0	0	0	0	2	2	2
HmN_000088300	2067		105	84	152	235	137	117	37	54	44	193	135	205	75	32	67	57	18	49
HmN_000088400	399		1291	1123	1818	1809	1977	1658	2019	2890	2291	2235	1480	2371	2989	1899	3044	3529	1963	4931
HmN_000088500	3360		493	368	834	743	692	585	203	315	176	416	253	307	347	255	402	352	182	330
HmN_000088600	1197		2541	2298	3789	4002	3586	3237	765	1085	871	2266	1538	2377	1368	1064	1828	903	516	801
HmN_000088700	1599		49	26	82	74	56	64	327	520	349	513	436	613	620	526	730	420	299	399
HmN_000088800	1551		997	798	1516	1601	1301	1156	358	605	479	673	395	580	1036	996	1315	499	216	304
HmN_000088900	867		4443	3783	6376	6671	6159	5563	833	1227	869	1530	1053	1504	2001	1375	1718	960	537	857
HmN_000089000	14853		75	53	92	70	90	76	217	335	257	16	8	38	637	440	853	197	87	36
HmN_000089100	837		0	0	0	0	0	2	2759	3809	2632	869	666	1204	4070	2672	4241	3792	2487	3690
HmN_000089200	660		0	0	0	0	0	1	0	1	2	1	1	0	0	0	0	0	0	2
HmN_000089300	1029		148	127	225	233	232	198	1271	1551	1385	2929	2220	3154	2554	1803	2807	1910	1317	1653
HmN_000089400	1014		1674	1400	2470	2794	2477	2343	869	1497	914	1370	974	1445	1734	1137	1659	1309	807	1546
HmN_000089500	1554		1142	993	1738	1808	1608	1524	574	1013	565	1147	768	1321	1020	726	1409	871	516	834
HmN_000089600	714		766	593	1214	1175	1141	1028	780	1201	865	836	523	930	2778	2305	2410	1088	702	1035
HmN_000089700	789		556	478	842	805	793	691	118	180	138	145	139	215	289	337	375	147	65	105
HmN_000089800	1218		524	477	893	877	744	728	182	327	218	425	353	390	380	335	440	304	183	231
HmN_000089900	870		866	719	1270	1293	1130	967	173	276	248	376	267	359	494	383	537	243	142	186
HmN_000090000	243		90	43	47	45	39	25	1	0	0	3	0	3	4	2	0	1	0	0
HmN_000090100	579		0	0	0	0	0	0	0	0	0	0	0	0	0	0	0	0	0	0
HmN_000090200	837		5241	4412	7871	7918	8108	7074	3375	4103	2987	4835	3832	6150	5031	4090	5724	4879	3384	5386
HmN_000090300	840		3118	2753	4564	4971	4394	3811	13813	16838	12779	11337	8883	12511	21563	16843	26382	23178	14168	23294
HmN_000090400	507		1411	1266	2060	2155	1884	1727	6171	15262	10937	20481	9114	18318	28069	7737	7367	8765	6478	7605
HmN_000090500	861		16	18	28	23	14	14	439	579	423	15	6	9	224	101	161	1325	861	2002
HmN_000090600	339		0	0	0	0	0	0	0	0	1	0	0	0	0	0	0	0	0	1
HmN_000090700	2271		1419	1233	2021	2200	1803	1604	706	1139	882	1965	1486	1706	1251	1111	1744	1331	773	1437
HmN_000090800	2607		883	747	1275	1342	1131	1038	963	1590	1099	1214	866	1203	2568	2489	3079	1518	759	1063
HmN_000090900	2331		157	157	305	335	272	227	99	128	102	189	120	159	210	135	333	65	27	30
HmN_000091000	534		54	50	76	69	72	58	153	246	196	144	134	194	428	347	490	141	116	116
HmN_000091100	966		166	137	296	269	208	222	116	158	131	255	215	357	186	130	212	165	81	162
HmN_000091200	315		15	7	9	16	6	12	3	10	10	11	8	17	8	2	0	7	0	0
HmN_000091300	2163		912	857	1361	1413	1172	1041	734	844	598	1181	646	911	936	691	896	997	646	1258
HmN_000091500	1437		336	323	525	544	434	408	293	372	227	423	308	383	405	259	352	368	191	501
HmN_000091600	990		185	175	272	256	215	218	492	557	561	1173	799	1158	755	593	931	777	603	1000
HmN_000091700	1542		2349	1922	3288	3470	2933	2633	1539	2610	1551	2294	1613	2830	2400	2341	2180	2672	2122	3672
HmN_000091900	330		465	432	750	764	573	486	118	210	111	315	164	299	173	113	165	192	147	243
HmN_000092000	324		5	11	18	9	9	12	1	3	2	13	3	2	6	5	4	3	2	1
HmN_000092100	387		833	706	1236	1236	1114	1033	735	1418	874	920	570	1278	1450	1255	1140	1366	1010	1550
HmN_000092200	714		832	704	1253	1263	1051	1003	1415	1870	1224	2152	1585	2518	2317	1747	2807	1604	1124	2142
HmN_000092300	1659		6147	5486	9236	9286	8587	7541	2219	3388	2117	3700	3034	4748	3626	3311	4751	3307	2255	3451
HmN_000092400	1008		0	0	2	0	0	0	114	137	127	2	4	2	620	437	293	125	22	0
HmN_000092500	1179		35	44	68	69	60	49	270	558	252	296	238	261	438	280	465	507	210	515
HmN_000092600	1881		1144	910	1893	1918	1569	1418	527	758	569	941	607	852	1150	1087	1515	777	364	724
HmN_000092700	771		268	232	347	408	426	405	219	340	211	480	425	731	438	368	414	291	174	264
HmN_000092800	1677		527	460	791	864	698	715	472	511	475	293	173	241	658	528	723	831	436	1244
HmN_000092900	3144		883	723	1362	1394	1143	1023	588	932	589	1032	648	969	1224	1050	1490	938	449	747
HmN_000093000	3129		992	817	1610	1667	1376	1229	726	1132	693	865	668	829	1608	1846	2160	983	400	666
HmN_000093100	1635		578	503	843	856	836	666	269	331	208	357	225	416	487	467	475	291	159	297
HmN_000093200	636		2403	2072	3355	3478	2989	2749	656	997	734	1026	891	1092	1363	1212	1502	1058	476	847
HmN_000093300	2094		1049	829	1591	1631	1361	1205	480	783	287	345	303	433	744	428	496	391	158	525
HmN_000093400	2013		28	20	73	54	45	50	105	279	59	30	17	45	47	41	49	513	307	180
HmN_000093500	1920		2056	1709	3185	3135	2746	2307	1834	2738	1639	2284	1587	1949	2560	2053	3208	3942	2541	3440
HmN_000093600	846		532	515	806	863	866	737	428	718	481	674	463	654	847	815	931	637	392	676
HmN_000093700	2289		767	634	1195	1339	1063	927	526	908	546	943	659	848	888	673	916	1018	519	1049
HmN_000093800	459		4	6	2	7	7	8	72	88	66	2	4	6	276	231	170	67	20	80
HmN_000093900	744		15	9	14	8	13	11	587	972	835	0	21	26	4025	3198	2753	803	196	7
HmN_000094000	660		6	0	1	1	4	0	19	39	28	0	8	1	80	55	94	47	26	7
HmN_000094100	813		1	1	1	2	0	0	27	45	25	2	5	1	77	65	89	28	53	3
HmN_000094200	516		0	0	3	0	1	2	1	1	0	0	0	0	3	2	2	0	0	0
HmN_000094300	411		38	40	49	68	44	64	2	11	13	37	47	60	18	8	5	6	6	4
HmN_000094400	207		7	8	4	11	7	10	0	1	1	1	3	2	0	1	0	0	0	0
HmN_000094500	852		16	6	21	41	17	8	2	4	6	44	31	50	2	0	2	0	0	0
HmN_000094600	9924		757	713	1277	1351	1184	1077	266	399	298	521	305	424	511	485	691	380	198	327
HmN_000094700	6120		1121	944	1677	1867	1644	1461	976	1656	1034	1615	1037	1425	1562	1351	2064	2074	1182	1884
HmN_000094800	396		118	126	239	240	200	167	25	40	18	49	20	27	62	20	34	14	6	18
HmN_000094900	1047		1106	1003	1744	1816	1619	1413	1393	2285	1361	1909	1371	2218	3398	3193	4023	1332	692	883
HmN_000095000	270		1645	1426	2325	2381	2425	2110	291	584	648	1399	491	986	1424	358	268	327	300	404
HmN_000095100	1662		679	542	1011	1145	972	865	609	1047	621	1010	729	1017	965	694	1040	1293	804	1379
HmN_000095200	498		325	296	513	519	480	490	99	187	116	215	170	255	299	137	153	139	89	141
HmN_000095300	531		4062	3413	5608	5859	6078	5301	1060	2949	2357	4012	1420	3308	4626	1358	1141	1360	1004	1230
HmN_000095400	1641		100	96	130	169	131	107	177	237	158	157	109	171	460	264	561	127	68	72
HmN_000095500	420		0	0	0	0	1	0	0	0	0	0	0	0	0	0	0	1	0	0
HmN_000095600	450		0	0	0	0	0	0	0	0	0	0	0	0	0	0	0	0	0	0
HmN_000095700	297		181	176	202	277	249	216	1	4	2	3	1	0	2	0	0	1	0	2
HmN_000095800	6588		751	657	1158	1155	877	871	264	409	306	837	664	952	275	214	447	449	197	317
HmN_000095900	2034		358	326	554	631	463	413	58	81	75	415	298	410	93	77	117	86	67	87
HmN_000096000	1689		389	330	611	651	496	470	34	75	53	331	294	365	76	70	182	56	32	69
HmN_000096100	702		220	155	247	332	244	232	779	915	750	2144	1497	2478	1316	1298	2209	660	610	668
HmN_000096200	330		0	0	2	0	1	0	28	28	28	2	2	0	107	115	100	10	0	2
HmN_000096300	1551		170	129	197	180	200	175	45	115	71	281	161	290	109	106	160	87	47	71
HmN_000096400	390		1	5	0	0	0	0	1	0	0	0	0	0	0	1	3	2	0	0
HmN_000096500	2127		708	524	1038	1065	839	784	343	634	468	720	506	546	771	648	856	622	284	369
HmN_000096600	1791		850	716	1164	1380	1137	903	457	712	522	967	563	901	999	679	961	753	424	754
HmN_000096700	2316		1039	802	1589	1652	1534	1242	290	451	294	592	482	593	535	394	617	416	249	410
HmN_000096800	468		170	144	261	275	154	176	42	166	69	216	93	153	111	35	26	89	62	75
HmN_000096900	417		203	184	288	265	246	224	29	62	48	62	26	31	122	41	39	39	34	49
HmN_000097000	225		0	3	0	1	1	3	10	17	6	0	0	1	22	5	2	12	4	38
HmN_000097100	1314		663	559	968	980	840	749	426	654	508	620	438	676	678	537	687	1009	651	1174
HmN_000097200	1644		883	827	1448	1560	1327	1150	288	425	254	434	374	516	742	726	807	300	160	196
HmN_000097300	810		309	271	461	518	390	404	141	198	143	323	224	311	295	221	356	135	100	187
HmN_000097400	354		886	730	1316	1240	1314	1273	28	61	37	100	42	91	198	32	53	39	16	28
HmN_000097500	1050		704	599	1144	1115	991	937	304	535	309	561	419	662	764	582	737	412	245	260
HmN_000097600	1182		204	186	309	284	219	192	80	120	47	105	103	138	94	40	49	81	15	132
HmN_000097700	366		0	0	0	0	0	2	2	1	0	0	0	0	4	1	3	1	0	0
HmN_000097800	510		4	0	3	5	4	6	1	0	3	1	2	2	4	7	4	2	1	0
HmN_000098000	2637		312	279	536	506	473	421	247	400	240	344	273	383	565	543	859	282	135	136
HmN_000098100	4287		632	570	955	1011	863	739	337	503	364	603	493	619	621	655	844	413	188	233
HmN_000098200	3015		810	702	1285	1364	1179	1114	290	508	294	511	415	470	550	428	601	553	311	478
HmN_000098300	537		558	428	810	771	881	797	162	321	270	480	365	649	387	410	492	310	185	272
HmN_000098400	1035		661	476	861	804	665	646	202	357	240	697	479	691	289	228	358	324	174	270
HmN_000098500	699		105	108	185	184	126	100	8	16	8	23	11	9	14	14	12	9	12	20
HmN_000098600	2772		453	401	729	718	644	568	533	873	530	966	629	795	800	560	1021	1068	553	904
HmN_000098700	1650		732	653	1087	1177	1065	867	746	1099	621	809	551	817	1314	1153	1459	1419	841	1021
HmN_000098800	429		1557	1411	2218	2177	2328	2124	364	489	381	1003	361	567	1413	297	264	386	383	618
HmN_000098900	675		526	397	751	786	741	648	184	289	168	304	260	372	435	445	614	296	128	210
HmN_000099000	633		0	0	4	1	2	0	0	1	0	0	0	0	0	0	0	2	0	0
HmN_000099100	1812		792	663	1293	1300	1027	925	471	760	458	723	424	538	705	586	974	846	502	860
HmN_000099200	504		10	5	7	14	6	4	33	30	11	33	20	33	23	21	36	44	28	32
HmN_000099300	5130		647	500	1030	1122	984	889	998	1379	976	722	524	687	2485	2386	2902	1191	841	701
HmN_000099400	1569		3358	2773	5373	5596	5094	4556	1543	2338	1623	3197	2378	3248	3190	2986	4674	1374	560	911
HmN_000099500	1836		959	790	1514	1465	1270	1043	159	293	173	665	442	613	225	179	312	276	139	360
HmN_000099600	2313		1076	1006	1688	1770	1444	1323	421	679	472	817	717	839	747	609	1085	649	341	597
HmN_000099700	1083		788	696	1219	1340	1138	989	486	706	536	1027	775	1134	968	922	1186	727	400	703
HmN_000099800	3399		2130	1917	3203	3411	2763	2554	1968	3008	2186	3205	2353	3182	4036	3203	5399	2492	1589	2104
HmN_000099900	2448		1155	979	1904	2003	1664	1651	678	1141	621	1355	905	1166	1084	795	1343	1166	635	1168
HmN_000100000	1251		1688	1423	2388	2617	2294	2099	738	1236	861	2098	1629	2015	1543	1275	1978	845	479	591
HmN_000100100	1836		3269	2929	4913	5146	4117	3777	1081	1651	885	2338	1803	2292	1413	1074	1573	1769	935	1927
HmN_000100200	594		42	53	140	134	113	88	6	14	5	22	24	26	7	12	18	11	5	9
HmN_000100300	1023		465	421	705	763	678	677	328	440	368	479	290	420	874	797	906	423	251	384
HmN_000100400	4785		1394	1117	1913	2087	1684	1506	784	1210	719	1503	940	1337	1314	1045	1614	1300	676	993
HmN_000100500	204		0	0	0	0	0	0	0	0	0	0	0	0	0	0	0	0	0	0
HmN_000100600	222		6	3	9	8	9	7	0	0	0	5	3	8	0	0	0	0	0	0
HmN_000100700	1833		434	415	699	744	684	618	347	740	472	1119	712	1024	695	485	715	767	498	797
HmN_000100800	2775		199	166	288	386	299	294	38	47	39	71	43	63	73	55	95	43	37	38
HmN_000100900	306		45	32	44	56	39	37	24	42	28	84	23	26	110	20	41	37	32	41
HmN_000101000	531		22852	19622	31060	32323	30249	27152	1200	3078	2462	5607	1853	2958	9896	1087	1091	1277	756	897
HmN_000101100	4140		94	88	159	169	151	109	547	978	360	780	486	750	404	250	497	796	335	1053
HmN_000101200	876		0	0	0	0	0	0	0	0	0	0	0	0	0	0	0	0	0	0
HmN_000101300	2553		181	133	220	238	229	224	888	1458	1099	533	396	388	1674	1518	3007	1357	768	871
HmN_000101400	3024		836	706	1316	1230	1083	972	299	505	346	475	357	406	588	561	768	489	285	409
HmN_000101500	669		902	822	1424	1440	1351	1234	603	924	710	830	544	853	1446	944	1288	1145	698	1060
HmN_000101600	408		1886	1491	2568	2668	2582	2300	81	191	132	332	111	233	670	39	100	77	53	56
HmN_000101700	2268		1620	1393	2460	2615	1935	1825	718	1130	741	1086	910	1131	1044	833	1338	1379	749	1147
HmN_000101800	12435		164	127	276	227	264	231	98	195	128	96	84	93	160	156	263	244	127	168
HmN_000101900	960		1280	1151	1914	2118	1923	1732	546	937	558	863	712	1257	943	658	985	786	474	426
HmN_000102000	483		19409	16380	27099	28010	27226	24630	781	1454	1109	4084	1829	2161	4162	705	729	684	612	880
HmN_000102100	2370		1031	830	1638	1775	1378	1286	457	753	500	1512	981	1335	846	664	981	615	338	552
HmN_000102200	891		749	684	1349	1329	1087	999	111	151	110	255	202	251	134	146	216	121	79	106
HmN_000102300	1239		4631	4082	6577	6849	5909	5350	579	845	684	2851	1881	2670	1148	769	1180	418	234	320
HmN_000102400	1299		772	635	1316	1390	1197	1020	614	925	555	892	636	950	1227	1006	1302	685	386	618
HmN_000102500	1368		285	252	482	475	423	424	128	208	136	199	121	211	285	272	350	197	86	167
HmN_000102600	1959		462	405	698	711	682	537	243	487	294	592	426	598	374	334	522	634	316	538
HmN_000102700	381		1586	1344	2370	2532	2463	2258	38	91	76	145	40	132	368	46	62	43	34	16
HmN_000102900	255		0	1	0	0	1	0	0	0	0	0	0	0	0	0	0	0	0	0
HmN_000103000	2586		5	4	11	12	4	6	4	1	3	7	1	14	3	3	10	6	3	4
HmN_000103100	240		0	0	0	0	0	0	18	22	25	0	0	0	88	115	65	13	2	0
HmN_000103200	237		99	82	123	132	146	131	288	540	339	4856	2363	2721	871	345	550	237	119	300
HmN_000103300	255		1174	1068	1767	1734	1296	1046	11	38	14	19	10	20	36	11	12	28	13	25
HmN_000103400	1407		997	856	1622	1672	1438	1314	305	366	288	862	624	753	530	386	574	324	173	261
HmN_000103500	1293		667	567	944	894	881	701	291	466	374	581	340	652	874	752	953	409	207	291
HmN_000103600	3210		718	744	1129	1129	1065	949	488	863	376	502	404	394	833	698	1193	681	347	591
HmN_000103700	1731		36	41	82	73	79	70	88	120	75	86	55	128	124	88	165	71	40	128
HmN_000103800	825		3875	3379	5398	5768	5065	4675	2110	3032	1722	2306	1537	2310	3219	2134	3105	3130	1924	3139
HmN_000103900	483		2	0	0	0	1	0	0	0	0	0	0	0	0	0	0	0	0	0
HmN_000104000	636		5	1	5	4	1	8	0	0	0	0	0	0	0	2	1	0	0	1
HmN_000104100	723		28	24	26	35	21	36	7	7	10	3	8	15	11	4	11	15	4	10
HmN_000104200	1098		21	18	24	26	29	34	24	31	28	13	17	15	35	19	45	34	10	23
HmN_000104300	864		659	581	855	941	808	720	197	306	243	505	436	630	541	427	624	187	107	197
HmN_000104400	756		17923	15187	25165	26294	23975	21641	11510	15967	13087	24160	17132	25745	21022	15965	25572	16216	11354	17105
HmN_000104500	765		1488	1392	2358	2583	2382	2127	448	698	563	643	452	865	1294	1010	1216	730	402	544
HmN_000104600	654		1170	992	1509	1721	1566	1356	708	943	712	1418	1097	1851	1228	1030	1423	1045	768	1054
HmN_000104700	8733		954	815	1403	1631	1277	1258	778	1260	648	907	612	767	891	715	1262	1937	1056	2249
HmN_000104800	2592		428	381	690	743	602	502	94	139	130	156	131	206	209	175	254	79	52	41
HmN_000104900	654		667	561	1075	983	782	764	291	420	355	389	290	471	684	654	861	473	285	528
HmN_000105000	2130		741	573	1074	1171	1011	912	578	1016	648	1090	717	870	1436	1244	1593	880	407	761
HmN_000105100	735		310	278	456	466	478	368	107	191	132	226	142	235	315	254	337	152	80	115
HmN_000105200	1983		552	524	847	829	665	639	339	520	357	730	469	659	530	442	677	854	437	861
HmN_000105300	2175		1508	1230	2102	2377	1978	1802	1297	2163	1504	2598	1643	2231	2344	1763	2952	2592	1628	2597
HmN_000105400	1035		2104	1872	3126	3340	2880	2584	1314	2235	1262	2154	1331	2238	2180	1668	2502	2806	1616	2689
HmN_000105500	1587		1151	886	1583	1688	1342	1354	484	857	541	966	606	993	1055	887	1306	827	411	656
HmN_000105600	252		93	60	113	126	105	82	22	18	20	41	33	51	30	41	70	31	25	31
HmN_000105700	495		415	286	608	570	682	507	43	81	75	119	50	78	323	62	56	28	24	48
HmN_000105800	1218		2107	1800	3072	3232	2731	2559	1361	2081	1393	2305	1700	2566	2289	1724	2997	1966	1154	1926
HmN_000105900	1191		3439	2951	4884	5223	4456	4115	2614	3665	2885	5459	3542	5167	4475	3295	4917	4834	3109	6014
HmN_000106000	510		30	34	62	48	38	23	329	509	431	546	336	362	642	460	639	358	263	300
HmN_000106100	2130		537	470	746	792	629	602	2140	3712	2619	4071	3263	4124	4523	3475	5936	2816	1691	1772
HmN_000106200	1014		2673	2247	3724	3869	3466	3160	481	758	571	1434	1119	1350	1202	818	1158	650	347	349
HmN_000106300	1275		353	292	513	559	474	497	212	274	194	272	217	323	695	507	625	227	95	120
HmN_000106400	618		884	810	1216	1281	1246	1178	516	940	668	1308	893	1135	1746	754	796	650	405	769
HmN_000106500	1056		3467	3271	5333	5617	5506	4907	496	735	458	937	539	826	1319	858	863	618	294	501
HmN_000106600	1713		119	93	182	171	157	122	42	83	54	70	42	60	192	101	175	33	10	15
HmN_000106700	2736		1823	1583	2368	2460	2212	1945	1179	1944	1252	2072	1587	1890	1594	1123	1875	2315	1272	2041
HmN_000106800	801		72	55	108	106	96	81	9	33	21	95	46	57	16	13	17	21	5	5
HmN_000106900	3006		332	307	586	559	451	456	227	373	209	354	233	264	338	357	510	348	187	256
HmN_000107000	1515		5769	4853	9132	9550	8121	7123	5795	7951	5341	7875	5952	7647	7672	6864	11195	8311	5406	9443
HmN_000107100	282		0	0	2	1	0	0	0	0	0	0	0	0	0	0	1	1	0	2
HmN_000107200	4305		1323	1199	2131	2171	1834	1715	832	1278	775	1257	996	1324	1463	1479	1998	1188	545	830
HmN_000107300	588		1804	1592	2635	2637	2624	2241	427	841	358	597	410	691	682	548	794	669	427	898
HmN_000107400	420		750	776	1248	1380	1293	1060	718	919	671	685	727	1342	1380	1786	1732	1110	696	1092
HmN_000107450	294		638	539	1009	1037	1003	908	38	69	52	86	47	64	162	51	61	39	23	36
HmN_000107500	564		654	513	890	878	900	704	835	1213	801	927	894	1222	1430	1629	2414	1468	684	1612
HmN_000107600	225		1282	1087	1592	1707	1184	1124	12	15	11	42	17	28	27	13	12	11	3	6
HmN_000107800	369		0	0	1	0	0	0	0	0	0	0	0	0	0	0	0	0	0	0
HmN_000107900	837		562	489	788	838	759	640	209	382	172	337	230	322	234	155	321	517	304	462
HmN_000108100	1119		186	154	271	287	219	215	132	127	144	341	221	300	177	93	123	98	57	249
HmN_000108200	1341		101	113	132	179	134	139	249	304	302	107	85	168	758	412	811	164	80	26
HmN_000108300	699		38	29	91	75	98	74	147	160	143	264	215	368	244	220	349	147	102	127
HmN_000108400	1020		1251	1032	1961	2032	1887	1820	299	493	311	1146	897	1135	765	466	478	306	134	234
HmN_000108500	1020		725	584	1275	1315	1163	987	88	157	117	498	388	705	231	155	263	108	73	62
HmN_000108600	1023		1089	936	1821	1847	1707	1556	125	178	103	368	384	422	216	168	290	158	76	114
HmN_000108700	873		27	30	21	37	43	48	6	11	5	115	66	85	5	17	10	9	5	4
HmN_000108800	600		0	0	0	0	1	0	558	853	337	2	8	5	996	868	859	710	227	563
HmN_000108900	1323		115	95	208	183	153	132	337	487	464	119	96	150	1190	1554	1596	160	22	21
HmN_000109000	3246		966	790	1306	1405	1184	1042	607	865	628	1561	1103	1580	1049	770	1155	908	600	1024
HmN_000109100	459		11	2	7	7	11	12	0	2	4	7	8	4	8	8	3	4	2	2
HmN_000109200	3234		543	486	798	895	687	612	1230	2404	978	985	608	786	1292	1110	1560	1858	936	1798
HmN_000109300	1521		370	339	649	653	615	521	73	120	67	254	119	175	178	93	203	106	56	85
HmN_000109400	993		363	317	456	490	492	452	109	188	168	476	272	518	265	228	392	187	117	181
HmN_000109500	1434		398	349	638	636	601	537	172	334	206	485	367	544	424	379	531	262	148	204
HmN_000109700	591		297	287	558	553	434	430	138	229	182	215	167	250	380	280	300	165	104	188
HmN_000109800	1674		250	227	502	471	441	380	162	214	195	292	227	350	383	289	408	191	91	114
HmN_000110000	345		0	0	0	0	0	0	65	0	0	0	0	0	446	0	0	0	0	86
HmN_000110100	1329		105	94	137	158	139	126	4	9	9	84	87	73	13	6	22	13	6	11
HmN_000110200	243		0	0	0	0	0	0	0	0	0	0	0	0	0	0	0	0	0	0
HmN_000110300	4284		405	374	646	696	499	519	438	636	475	526	342	437	943	1228	1501	471	240	318
HmN_000110400	270		104	4	22	234	240	237	0	0	0	0	0	0	1	0	0	0	0	0
HmN_000110500	1503		1917	1665	2982	3217	2955	2668	776	1268	859	1192	804	1189	1747	1468	2166	1221	636	908
HmN_000110700	1026		0	0	13	0	0	1	0	0	0	0	0	0	0	0	0	0	0	0
HmN_000110800	2061		322	291	494	557	430	401	245	406	196	277	168	208	428	386	594	478	262	300
HmN_000110900	594		1415	1247	1929	1990	1822	1599	785	1119	819	1431	1285	2399	1120	1518	1730	1225	854	1218
HmN_000111000	2493		579	514	954	900	702	701	383	666	405	579	375	405	808	710	974	892	465	776
HmN_000111100	1233		273	186	348	362	325	311	183	267	166	194	124	217	472	499	485	184	56	86
HmN_000111200	567		124	101	145	165	177	136	22	51	43	374	312	615	23	30	34	23	24	35
HmN_000111300	480		26755	23138	34943	36368	33422	30087	1596	4194	2910	5972	1792	2880	12484	1230	1364	2141	1442	1563
HmN_000111400	909		525	475	856	890	755	680	351	466	277	595	451	569	513	410	628	608	326	623
HmN_000111500	846		46	30	74	78	53	53	16	29	14	47	18	46	16	14	26	20	5	24
HmN_000111600	1110		24	13	26	32	25	40	8	39	17	35	34	31	18	6	41	27	14	25
HmN_000111700	2604		913	770	1412	1421	1128	1095	429	688	491	673	511	535	728	659	963	705	415	685
HmN_000111800	249		589	488	864	879	820	748	4	17	9	26	12	19	35	5	18	3	3	4
HmN_000112000	1119		54	63	120	97	99	95	118	179	120	3	5	14	600	506	450	129	40	18
HmN_000112100	2667		50	39	63	89	71	50	356	552	463	104	67	102	1121	847	1445	355	131	71
HmN_000112200	1590		125	150	227	168	141	135	22	34	20	78	55	69	47	34	30	52	22	24
HmN_000112300	318		0	0	1	1	0	0	0	0	0	0	0	2	0	0	0	3	1	0
HmN_000112500	2046		296	208	422	435	280	287	103	167	150	265	168	272	192	94	158	200	103	239
HmN_000112600	2628		2107	1808	3527	3387	2804	2642	1040	1548	922	1443	1124	1268	1664	1241	2029	1598	952	1405
HmN_000112700	2241		629	557	927	824	748	663	1840	2716	1810	3638	2383	3625	2855	2164	3464	3195	1906	2798
HmN_000112800	312		0	0	2	3	0	3	608	1929	316	3	2	5	1	4	29	3617	2066	802
HmN_000112900	861		4	2	6	2	0	4	3193	4396	1308	8	5	10	4	8	59	16137	8714	4207
HmN_000113000	4038		447	339	600	639	550	519	167	303	164	243	122	188	296	204	317	269	144	244
HmN_000113100	678		672	548	824	846	842	724	156	323	204	440	361	397	371	188	345	365	282	373
HmN_000113200	516		8	2	1	3	5	5	0	0	0	0	0	0	0	0	0	0	2	0
HmN_000113300	951		5270	4526	7851	7938	7072	6362	1934	4146	2424	5400	3095	5102	3364	2419	4231	4280	2353	4278
HmN_000113400	507		0	0	0	0	2	0	16	14	5	0	0	0	15	13	8	17	6	6
HmN_000113500	1539		138	100	212	199	190	161	156	247	179	145	127	133	418	545	615	195	71	82
HmN_000113700	3264		526	460	961	997	833	751	243	384	284	458	311	356	432	371	603	372	169	313
HmN_000113800	891		0	0	0	0	0	0	0	0	0	0	0	0	6	1	2	0	0	0
HmN_000113900	573		174	120	230	202	208	160	26	43	23	66	27	57	29	13	32	27	20	31
HmN_000114000	2022		528	408	887	899	740	654	245	413	297	652	518	764	572	508	632	316	172	167
HmN_000114100	267		0	0	0	0	0	1	3	3	3	0	0	0	6	5	7	2	1	0
HmN_000114200	486		0	0	0	0	0	0	5	8	9	0	0	0	7	17	29	2	0	0
HmN_000114300	2655		4	3	16	7	1	3	1265	1798	1518	9	28	47	5699	6307	5202	903	83	20
HmN_000114400	1068		0	0	0	0	0	0	39	54	65	0	0	0	212	221	217	35	6	0
HmN_000114500	777		877	764	1278	1283	1409	1125	212	316	257	462	369	590	422	301	502	276	159	221
HmN_000114600	1014		664	545	1063	1164	990	896	157	262	195	302	199	336	307	214	392	256	124	204
HmN_000114700	324		304	273	518	501	480	448	45	65	61	119	49	96	277	60	65	53	48	55
HmN_000114800	1497		2055	1747	3127	2939	2915	2543	1268	1808	1423	2635	1548	2564	2111	1566	2610	1736	1014	1612
HmN_000114900	1182		737	641	1225	1242	1077	955	570	769	649	865	717	912	859	973	1435	1003	527	1025
HmN_000115000	891		940	835	1320	1449	1126	995	1292	2153	1566	1683	1066	1487	2438	1732	2583	3011	1655	3295
HmN_000115100	357		5	2	0	0	0	1	17	27	24	0	0	0	60	46	46	12	6	0
HmN_000115200	1119		223	193	420	384	345	336	66	91	88	216	195	263	177	131	216	104	67	67
HmN_000115300	510		343	271	571	534	543	471	187	360	220	467	319	501	546	463	674	321	194	282
HmN_000115400	567		387	320	573	614	487	423	78	72	73	216	165	273	132	131	206	60	61	62
HmN_000115500	4236		1141	1077	1804	1825	1607	1503	434	692	385	590	406	566	825	676	953	759	378	639
HmN_000115600	2181		23	13	28	21	24	13	225	262	219	2	5	16	958	1028	810	118	14	9
HmN_000115700	624		0	0	0	0	0	0	0	0	0	0	0	0	0	0	0	0	0	0
HmN_000115800	354		210	161	253	230	184	172	121	183	171	532	357	467	474	158	167	204	121	175
HmN_000115900	594		4987	4223	5973	6342	5564	4897	835	1245	1310	6849	5653	7987	1710	1224	2144	1557	876	775
HmN_000116000	225		7	4	11	6	3	10	3	0	1	10	10	11	5	4	5	4	0	3
HmN_000116100	1290		91	107	192	198	166	161	56	71	56	73	95	114	67	102	100	56	38	36
HmN_000116200	246		506	506	811	805	850	802	132	304	241	416	140	386	731	214	172	180	128	153
HmN_000116300	3789		129	111	169	154	148	112	41	36	26	88	35	42	61	17	53	43	39	41
HmN_000116400	333		173	136	176	219	167	128	42	65	45	125	40	65	114	74	65	53	26	44
HmN_000116500	372		244	211	387	402	352	379	41	69	76	130	60	135	221	76	74	71	43	78
HmN_000116600	2823		1680	1471	2598	2734	2259	2178	1214	2186	1561	2541	1794	2199	2374	1855	2933	2370	1268	2421
HmN_000116700	267		2660	2517	3880	4116	3946	3741	145	285	164	305	127	255	630	116	197	200	159	185
HmN_000116800	684		394	295	560	556	519	424	155	223	166	166	184	229	407	430	520	177	66	63
HmN_000116900	1413		511	445	699	831	590	515	1943	3324	2168	3373	2480	3114	3307	2459	4024	4109	2579	4184
HmN_000117000	792		244	226	359	354	320	314	259	468	268	262	176	257	375	337	459	670	363	694
HmN_000117100	915		0	0	0	2	0	0	356	738	190	0	0	0	0	0	15	861	388	834
HmN_000117200	834		2	0	0	2	1	0	69	66	26	23	12	31	18	12	30	94	32	184
HmN_000117300	3777		1260	1002	1825	1951	1683	1500	824	1370	939	1384	885	1363	1559	1310	1751	1504	890	1554
HmN_000117400	255		0	0	3	0	0	0	0	2	0	0	0	1	3	1	2	3	2	1
HmN_000117500	612		0	0	1	1	1	1	2	5	0	0	2	1	2	1	1	6	0	0
HmN_000117600	654		396	315	680	673	636	523	132	201	121	269	236	449	221	295	375	120	95	94
HmN_000117700	1122		533	541	828	877	902	729	223	388	243	541	425	472	451	364	594	289	123	176
HmN_000117840	1248		623	521	995	1095	884	826	263	394	261	600	392	570	472	326	572	355	201	396
HmN_000117900	3111		179	182	286	315	249	231	246	450	266	378	263	294	423	397	679	559	273	457
HmN_000118000	2253		1430	1323	2595	2570	2182	2016	803	1249	877	1502	1005	1469	1243	1019	1652	1308	835	1566
HmN_000118100	1839		97	81	196	189	145	128	30	96	71	80	52	89	121	92	156	56	23	37
HmN_000118200	1272		4967	4279	7409	7908	6618	6033	2539	4239	2616	3221	2124	3047	4702	3993	6172	4027	2475	4160
HmN_000118300	3573		1050	844	1560	1637	1402	1228	237	361	232	920	769	910	371	340	439	311	157	260
HmN_000118400	2397		188	121	226	227	217	211	290	445	358	170	116	208	1053	1116	1177	274	82	56
HmN_000118500	2655		1367	1172	2144	2231	1861	1656	980	1507	1076	1410	975	1653	1787	1583	2403	1686	991	1660
HmN_000118600	1494		0	0	1	3	0	0	763	1243	490	5	4	1	904	728	951	1357	725	1228
HmN_000118700	1512		0	2	0	0	4	2	380	723	269	2	3	2	722	619	1072	508	368	292
HmN_000118900	1554		1443	1193	2026	2147	1545	1476	195	198	203	409	280	395	320	164	361	218	123	238
HmN_000119000	1650		281	225	371	332	336	286	1469	1815	1598	1282	792	978	1949	1453	2347	3262	1905	4578
HmN_000119100	1590		370	351	529	598	442	414	619	747	598	711	641	744	662	570	927	1436	826	1431
HmN_000119200	1701		937	807	1458	1535	1240	1090	2757	4012	2343	2944	2259	2614	2909	2269	3645	6742	3965	7369
HmN_000119300	723		3	4	4	0	2	1	2	0	0	0	0	2	7	2	10	3	0	1
HmN_000119400	2208		5257	4390	8356	8751	7067	6502	1009	1610	1090	1868	1426	1754	2074	1681	2353	1304	739	1049
HmN_000119500	267		1	0	0	0	0	2	0	0	1	0	0	0	1	0	1	0	0	0
HmN_000119600	798		69	77	109	122	112	100	25	64	50	71	49	102	48	22	77	51	30	61
HmN_000119700	2397		2291	1918	3453	3629	3133	2618	651	915	709	1726	1150	1651	990	852	1588	770	456	563
HmN_000119800	1704		41	46	64	85	86	76	235	394	286	41	18	60	567	446	833	169	113	120
HmN_000119900	816		680	632	1155	1069	926	902	272	405	271	500	319	552	524	370	540	391	266	380
HmN_000120000	1884		487	473	796	871	752	784	1886	2919	1184	670	389	581	2344	1249	1878	3329	1765	3671
HmN_000120100	1869		2918	2374	4450	4870	4079	3781	2578	3702	2548	2524	1907	2795	4825	3895	5690	4401	2713	4148
HmN_000120200	426		14373	12276	19934	21157	19665	17443	3339	6099	3841	6377	3995	7147	6912	4292	3677	4952	4512	6277
HmN_000120300	1515		478	427	811	855	765	672	476	739	419	1304	953	1401	581	503	896	862	546	907
HmN_000120400	5520		614	625	1015	1057	905	900	555	815	510	681	451	671	1096	884	1132	853	406	724
HmN_000120500	1062		2	0	0	0	1	1	3344	4699	3933	13	69	57	13419	15700	17808	1794	1127	71
HmN_000120600	2205		1056	961	1685	1742	1468	1419	434	767	386	705	533	731	847	623	728	1012	559	965
HmN_000120700	3219		1307	1075	1932	2054	1573	1469	970	1514	914	889	636	756	1345	1211	1888	2402	1261	2217
HmN_000120800	885		994	909	1610	1729	1400	1256	608	1056	642	870	532	922	1430	1206	1629	922	527	893
HmN_000120900	1746		5384	4632	8799	8971	7690	6948	1687	2551	1858	3744	2929	4030	3613	3337	5131	1996	972	1182
HmN_000121000	1272		1510	1247	2439	2523	1988	1721	747	995	710	1622	1241	1487	1118	893	1318	1261	813	870
HmN_000121100	393		452	396	667	738	599	522	100	167	117	281	151	205	239	112	126	186	118	164
HmN_000121200	513		0	0	0	0	0	0	0	0	0	0	0	0	2	0	0	0	0	0
HmN_000121300	666		36	33	47	51	61	41	67	121	51	122	73	101	102	53	67	156	62	96
HmN_000121400	303		2531	2139	4027	4045	4014	3599	66	124	87	273	106	140	309	61	99	82	56	77
HmN_000121500	5100		507	523	890	897	691	654	1151	2072	1307	1428	1059	1265	1458	1271	2095	2792	1590	2914
HmN_000121600	930		526	462	876	943	741	785	209	406	297	299	266	430	544	437	600	324	171	275
HmN_000121700	1020		1664	1414	2436	2540	2282	2016	509	794	538	780	541	767	1031	772	931	984	621	925
HmN_000121800	1248		2339	1980	3738	3911	3199	3020	1050	1658	1035	2003	1339	2031	1555	1412	2299	2156	1224	2100
HmN_000121900	1872		1118	1026	1820	1804	1590	1322	581	935	542	695	589	793	1469	1405	1744	787	388	551
HmN_000122000	1047		5651	4777	8438	8936	7760	7374	6097	9699	5878	10331	7333	11474	9734	8022	14418	8529	5110	8757
HmN_000122100	207		1124	954	1708	1653	1627	1471	444	688	454	1358	838	1525	799	507	729	558	372	610
HmN_000122200	2214		1154	899	1752	1923	1761	1559	1706	2455	1736	1694	1428	1810	4307	5223	6333	1401	587	675
HmN_000122300	1620		176	205	292	334	296	307	138	232	176	339	205	261	493	417	540	248	114	96
HmN_000122400	318		1286	1105	2173	2297	2244	1968	45	152	103	362	137	284	314	43	115	62	38	40
HmN_000122500	2838		232	204	293	315	311	246	29	44	60	76	25	60	130	41	99	38	20	31
HmN_000122600	597		119	115	209	192	194	157	54	56	52	89	67	122	36	44	81	37	31	55
HmN_000122700	1716		393	331	595	636	568	481	1059	1433	1346	167	167	264	5145	4566	4289	1233	506	183
HmN_000122800	264		0	0	0	0	0	0	0	0	0	0	0	0	0	0	0	0	0	0
HmN_000122900	282		0	0	0	0	0	1	0	3	0	0	0	0	9	3	5	0	3	0
HmN_000123000	2250		1207	999	1941	1987	1640	1472	887	1428	734	1440	1041	1266	972	745	1262	2130	1146	2131
HmN_000123100	513		278	253	408	456	370	321	388	660	471	556	258	456	735	360	478	762	552	865
HmN_000123400	444		2	1	4	2	2	2	0	2	0	0	0	0	0	0	0	2	2	0
HmN_000123500	927		384	393	696	664	599	560	143	157	124	180	189	232	370	522	515	96	42	25
HmN_000123600	2415		616	472	979	1039	911	766	243	290	225	568	391	539	290	371	485	266	151	292
HmN_000123700	1551		4516	3823	6751	6913	6179	5358	2517	3746	2545	3947	2681	3901	3841	2888	4272	4049	2675	4704
HmN_000123800	2271		354	336	603	664	556	490	234	536	283	522	391	460	605	406	543	435	285	443
HmN_000123900	483		0	0	0	0	2	0	14	23	44	0	0	2	408	99	44	13	6	0
HmN_000124000	870		4	12	6	4	2	2	2	8	2	7	19	10	15	15	22	12	17	28
HmN_000124100	759		698	574	993	951	888	729	259	459	268	521	328	479	686	618	859	491	220	426
HmN_000124200	819		1290	1139	1877	2008	1506	1459	784	1234	870	1637	1280	1753	1453	1031	1594	1381	893	1447
HmN_000124300	6969		1592	1339	2457	2672	2216	1968	604	962	589	1040	780	979	1058	910	1299	1112	629	930
HmN_000124400	429		315	299	482	492	498	457	105	214	138	256	85	133	778	144	171	102	67	95
HmN_000124500	3147		1034	846	1588	1556	1286	1099	538	833	498	708	558	708	853	679	1132	960	528	839
HmN_000124600	1254		2	1	4	12	5	1	0	0	1	3	1	1	2	8	6	0	0	2
HmN_000124700	1785		1367	1201	2156	2388	2045	1758	641	1072	582	1471	938	1350	994	883	1513	1034	573	994
HmN_000124800	852		559	521	902	833	757	624	344	577	410	525	370	552	1035	1084	1143	367	231	399
HmN_000124900	756		666	562	1044	1081	944	887	261	347	255	486	400	575	401	376	696	291	193	284
HmN_000125000	213		1062	959	1250	1369	1062	1001	12	18	11	51	14	24	24	16	13	11	5	10
HmN_000125100	2106		2808	2399	4193	4295	3901	3483	1108	1500	986	678	570	749	3168	2013	3236	1389	1368	818
HmN_000125200	3126		262	246	500	489	503	396	205	233	180	89	87	78	407	289	518	303	218	143
HmN_000125300	1227		1578	1492	2507	2657	2507	2149	493	752	617	1201	955	1489	1056	894	1275	731	414	677
HmN_000125400	2178		136	104	180	216	171	159	124	202	172	140	102	130	363	379	425	207	90	170
HmN_000125500	2337		1051	802	1606	1702	1523	1352	622	1033	747	1307	1042	1437	1307	1135	2069	754	427	545
HmN_000125600	948		710	565	989	1041	887	786	0	1	0	27	11	26	0	0	0	0	0	0
HmN_000125800	249		11	11	14	11	13	19	2	0	1	1	0	1	0	0	0	1	0	3
HmN_000125900	1446		526	358	704	745	804	652	158	285	199	420	316	460	349	295	388	270	197	371
HmN_000126000	1665		1336	1266	1980	2041	1769	1530	566	852	563	1277	901	1095	988	816	1073	838	490	871
HmN_000126100	1074		57	29	46	73	65	49	4261	5965	3044	29	44	63	5081	5245	7339	5913	2244	5086
HmN_000126200	1155		0	0	0	0	4	0	6115	7464	4556	13	52	54	10494	11013	16690	6399	1996	2239
HmN_000126300	1128		1	0	3	7	4	10	1279	1589	976	5	14	17	2551	1795	3061	1231	952	943
HmN_000126400	2949		368	366	643	645	493	460	450	771	423	467	318	434	781	615	842	1322	852	928
HmN_000126500	252		24	22	41	48	32	38	20	23	6	34	38	73	30	17	12	30	16	30
HmN_000126600	666		698	501	848	865	798	707	33	62	67	268	226	354	102	69	86	71	32	50
HmN_000126700	651		0	0	0	0	0	0	158	185	270	2	2	1	933	765	650	184	29	3
HmN_000126800	579		0	2	0	4	2	2	143	321	150	2	3	4	1092	263	212	96	53	217
HmN_000126900	2232		403	320	561	610	511	477	215	302	186	258	191	224	503	494	519	249	152	253
HmN_000127000	516		0	0	0	0	0	0	0	1	0	0	0	0	0	1	0	0	0	0
HmN_000127100	3126		62	48	113	87	76	69	20	26	36	100	78	84	26	19	44	13	8	40
HmN_000127200	2961		1097	897	1812	1845	1630	1423	581	946	564	865	631	956	1325	1216	1544	653	335	390
HmN_000127300	303		10	12	19	12	10	11	275	519	404	803	277	481	1462	304	272	342	306	333
HmN_000127400	1518		118	81	129	156	122	116	184	296	212	246	136	280	477	322	527	242	129	183
HmN_000127500	867		366	379	652	687	541	541	186	285	157	273	168	300	272	191	315	359	208	363
HmN_000127600	858		850	624	1092	1134	1190	1007	242	343	123	8	15	16	223	119	163	331	170	525
HmN_000127700	882		0	0	0	3	2	2	58	140	32	0	1	0	1	0	7	82	44	152
HmN_000127800	786		29	12	15	31	12	17	49	79	41	203	194	262	54	42	85	54	36	63
HmN_000127900	1998		0	0	0	0	0	0	113	162	143	12	6	7	342	321	544	64	67	25
HmN_000128000	432		0	0	0	0	0	0	52	57	80	0	0	9	529	185	73	23	6	0
HmN_000128100	825		149	138	252	279	255	221	164	329	170	204	112	200	308	208	251	230	156	249
HmN_000128200	534		1361	1256	2070	2129	2088	1934	581	1290	979	1630	862	1788	1442	1057	1010	785	521	729
HmN_000128300	1530		16	21	16	10	15	13	265	392	328	7	17	6	734	535	1155	144	54	17
HmN_000128400	1386		180	192	313	301	306	292	779	1152	1129	162	148	240	3559	3544	3295	558	133	73
HmN_000128500	4527		604	431	788	914	695	593	592	1032	659	926	610	773	804	581	865	1377	782	1538
HmN_000128600	3183		590	464	856	899	792	622	327	518	314	689	501	634	662	592	791	460	186	241
HmN_000128700	741		106	83	211	179	188	157	410	862	457	794	471	697	599	552	773	1152	637	922
HmN_000128800	846		4	1	0	3	1	6	7	32	14	256	97	181	16	1	16	4	2	6
HmN_000128900	414		0	0	0	0	2	0	0	0	2	0	0	0	2	1	0	2	0	0
HmN_000129200	843		0	0	0	0	2	3	7	15	6	0	0	0	25	24	13	4	4	2
HmN_000129300	327		0	0	0	0	0	0	0	5	1	0	0	0	0	0	0	3	1	0
HmN_000129400	216		0	0	0	0	0	0	0	0	0	0	0	0	0	0	0	0	0	0
HmN_000129500	1563		1815	1643	2730	2913	2557	2270	1149	1856	1323	1866	1280	1857	2259	1597	2495	1879	1143	1644
HmN_000129600	603		403	316	590	638	642	566	129	170	141	311	219	367	282	230	302	160	89	135
HmN_000129700	1056		670	595	948	1003	1009	889	282	441	303	492	299	444	639	476	698	386	217	361
HmN_000129800	504		355	271	463	445	452	458	79	130	122	181	120	162	354	92	141	111	40	53
HmN_000129900	801		0	1	2	0	2	2	946	1456	1267	0	18	7	3457	2737	4261	900	437	104
HmN_000130000	972		277	258	403	341	334	228	2013	2476	2048	6116	4959	7450	3289	3127	4957	3429	2834	3686
HmN_000130100	462		0	1	2	2	0	1	10	18	7	10	8	20	7	11	16	7	16	14
HmN_000130200	4203		226	245	413	417	308	333	115	138	124	238	194	216	224	165	257	186	80	111
HmN_000130300	570		0	0	0	0	0	0	87	186	137	2	9	11	1653	210	128	116	79	66
HmN_000130400	915		8	3	12	7	13	3	175	180	227	7	2	4	1039	918	646	223	62	7
HmN_000130500	429		0	0	0	0	0	2	0	0	0	0	0	0	0	0	0	0	0	0
HmN_000130600	210		0	0	0	0	0	1	0	0	0	0	0	0	0	0	0	0	0	0
HmN_000130700	438		5	3	3	12	6	6	16	25	13	20	13	19	25	18	36	20	19	37
HmN_000130800	2442		650	578	1090	986	882	800	806	1381	719	1166	889	935	1024	1043	1517	1033	512	1287
HmN_000130900	852		2152	1968	3316	3439	3052	2712	1501	2207	1773	4023	2592	4260	2670	2150	3424	1700	1079	1395
HmN_000131000	1887		1147	1017	1947	1943	1595	1535	1082	1663	965	1187	930	1048	2467	2150	2734	1581	780	1318
HmN_000131100	3186		2223	1887	3634	3547	3090	2757	818	1275	845	1358	1138	1198	1720	1988	2319	940	491	709
HmN_000131200	282		0	0	0	0	0	0	1	0	0	0	0	0	0	0	0	0	1	1
HmN_000131300	2193		249	191	397	440	379	312	175	376	183	331	284	326	258	220	455	334	170	203
HmN_000131400	1263		1116	944	1505	1577	1251	1221	356	820	569	1005	724	1113	731	544	1073	799	436	588
HmN_000131500	1317		534	379	815	779	690	690	382	568	340	490	298	490	714	542	688	785	378	768
HmN_000131600	2115		464	445	769	774	640	628	376	603	413	692	452	669	599	432	691	722	391	737
HmN_000131700	1893		0	0	0	0	0	3	317	336	356	4	11	4	882	650	1208	239	59	13
HmN_000131800	591		170	140	230	240	188	189	246	394	300	115	72	96	1177	1010	901	359	180	204
HmN_000131900	3288		102	99	189	192	178	115	72	100	53	172	106	119	123	87	158	139	58	115
HmN_000132000	507		166	178	285	276	283	203	74	163	160	255	124	213	208	115	139	105	98	86
HmN_000132100	363		0	0	0	0	0	0	2	0	2	0	0	0	10	6	1	1	0	0
HmN_000132200	258		0	0	0	0	0	0	0	0	0	0	0	0	2	0	1	0	0	0
HmN_000132300	516		522	406	769	763	637	603	809	1221	721	1003	716	1155	755	641	781	2470	1680	2212
HmN_000132400	2223		1489	1261	2378	2396	1866	1880	1115	1625	800	1498	922	1310	1349	1041	1599	3688	2208	1926
HmN_000132500	3921		363	351	567	585	470	501	411	537	376	405	225	407	719	796	1019	476	231	301
HmN_000132600	3024		978	894	1679	1652	1311	1312	582	1037	535	884	591	698	914	680	1091	1111	544	827
HmN_000132700	2124		1659	1327	2139	2258	1857	1663	1168	1853	1060	2414	1577	1929	1640	1286	2023	2017	1116	1943
HmN_000132800	948		103	96	154	187	119	122	352	461	357	124	86	188	999	726	1379	219	140	43
HmN_000132900	2919		2378	2110	3611	3681	3005	2717	2150	3267	2491	4951	3672	4491	3133	2596	4450	3737	2326	3456
HmN_000133000	9168		1442	1147	2168	2322	1865	1714	955	1227	856	932	673	900	1571	1352	2006	1647	835	1678
HmN_000133100	321		1	0	1	1	0	12	0	3	0	2	0	0	1	2	1	1	1	3
HmN_000133200	1029		291	204	335	362	266	267	255	397	263	396	292	340	504	311	484	506	268	532
HmN_000133300	888		4145	3702	6420	6489	5713	5083	788	1479	857	1774	1117	1584	1398	964	1484	1125	684	1111
HmN_000133400	876		1995	1625	2939	3122	2843	2355	1212	2157	1456	2030	1371	2161	2653	1659	2498	2905	1760	2932
HmN_000133500	2964		112577	96615	159326	166263	136680	123811	57566	84707	50208	82872	64616	83954	82798	76277	133107	109795	58448	102003
HmN_000133600	1161		2541	2202	3662	3608	3240	3010	1498	2230	1334	1782	1255	1680	2077	1628	2414	2340	1367	3116
HmN_000133700	354		3930	3590	5749	6013	6143	5538	954	1754	1616	2983	1582	3121	3611	1320	1091	1296	914	1200
HmN_000133900	420		3	6	13	8	9	6	1	1	3	0	0	1	2	2	0	0	0	1
HmN_000134000	228		0	0	0	0	3	2	0	0	0	0	0	0	2	1	0	1	0	0
HmN_000134100	1086		92	86	151	147	145	98	340	439	202	123	124	153	443	282	382	304	136	563
HmN_000134200	459		0	0	0	0	0	0	6	3	10	0	0	0	31	14	17	1	0	0
HmN_000134300	1368		1582	1311	2275	2265	1956	1768	486	1036	763	1345	830	1244	1101	812	1106	1174	743	1154
HmN_000134400	882		425	304	605	588	577	440	165	238	177	257	109	251	303	181	257	269	140	230
HmN_000134500	321		2089	1626	2477	2424	2357	2130	5	6	8	9	2	3	36	4	14	8	9	5
HmN_000134600	1413		30	22	27	31	23	33	6	13	10	19	3	16	13	14	14	6	10	9
HmN_000134700	747		0	0	0	0	4	0	0	0	0	0	0	0	0	0	2	0	0	1
HmN_000134800	303		0	0	0	0	1	0	0	0	0	0	0	0	0	0	0	0	0	0
HmN_000134900	1803		247	194	358	422	364	299	71	120	59	190	202	274	97	102	108	206	132	171
HmN_000135100	1008		36	27	49	34	41	28	232	529	280	597	283	570	384	282	395	506	286	440
HmN_000135200	258		0	0	0	0	0	0	0	0	0	1	0	0	0	0	0	0	0	0
HmN_000135300	1131		0	2	2	3	4	2	1246	1556	541	12	10	19	2593	901	765	805	75	1544
HmN_000135400	1734		880	715	1403	1487	1179	1086	647	1040	580	534	386	481	884	833	1175	2168	1058	1272
HmN_000135500	1548		1006	741	1350	1301	1177	1052	917	1473	1002	943	563	940	1828	1509	2175	1405	833	1640
HmN_000135600	678		117	125	266	273	246	226	521	746	636	126	131	210	2213	2227	2351	334	67	113
HmN_000135700	669		0	0	2	1	1	11	0	3	3	4	2	0	5	6	4	3	6	3
HmN_000135800	321		0	0	0	0	0	2	0	0	0	0	0	0	0	0	0	0	0	0
HmN_000135900	372		0	0	1	0	1	1	0	0	0	1	0	1	0	0	0	2	0	1
HmN_000136000	2340		204	155	317	349	273	228	264	372	226	239	203	267	567	595	562	257	98	153
HmN_000136200	783		360	262	399	533	375	451	134	219	150	187	154	255	392	415	442	190	134	170
HmN_000136300	756		0	0	0	0	0	1	719	1029	313	2	6	6	954	275	449	452	147	1087
HmN_000136400	3480		899	746	1376	1342	1140	1056	629	1026	682	1215	758	1035	964	746	1107	1438	832	1237
HmN_000136500	1299		1555	1243	2140	2289	1860	1719	968	1766	1093	1960	1288	2064	1815	1394	2083	1467	918	1603
HmN_000136600	1590		1684	1453	2723	2753	2486	2222	113	204	87	233	166	250	179	114	187	186	118	192
HmN_000136700	1557		428	344	567	542	417	432	65	119	19	53	58	67	68	21	20	212	94	131
HmN_000136800	2520		1994	1737	3067	3266	3037	2355	516	740	588	1635	1506	1711	823	796	1317	544	381	631
HmN_000136900	396		0	0	0	0	3	0	3	3	0	0	1	0	0	0	0	2	0	2
HmN_000137000	3663		2202	1808	3530	3623	3113	2643	1359	2243	1539	2725	1996	2613	4097	3886	4160	1640	680	834
HmN_000137100	786		395	391	636	660	594	524	420	631	542	1698	1168	1880	753	590	807	801	493	856
HmN_000137200	1617		1637	1507	2969	3019	2453	2205	206	432	233	1550	1211	1551	391	269	359	279	125	242
HmN_000137300	2688		915	793	1434	1498	1251	1207	972	1842	1111	941	612	850	2267	1967	2747	1933	961	899
HmN_000137400	1218		2401	1977	3303	3539	3109	2745	1196	1645	1172	2216	1845	2325	2030	1815	2863	1941	1140	1878
HmN_000137500	1041		301	266	485	502	452	419	279	357	260	150	130	170	501	605	770	354	145	237
HmN_000137600	2127		217	199	368	310	344	237	32	63	38	190	126	145	70	70	88	72	42	57
HmN_000137800	906		0	0	0	0	0	0	0	0	0	0	0	2	0	0	0	2	1	1
HmN_000137900	210		0	0	3	0	0	0	3	10	0	4	2	1	4	6	1	1	2	5
HmN_000138000	981		0	0	0	1	0	0	3	1	1	0	0	0	1	1	0	1	3	4
HmN_000138100	357		0	0	0	0	0	0	0	3	0	0	1	1	0	1	0	0	2	0
HmN_000138200	501		0	0	0	0	3	3	1	0	1	0	0	0	11	4	4	2	0	0
HmN_000138300	9336		3858	3261	5721	6002	5342	4655	1971	3265	2300	4160	2961	4439	4613	3661	5257	2596	1408	2055
HmN_000138400	1884		306	308	686	686	527	536	265	426	305	136	83	157	723	715	1067	160	60	66
HmN_000138500	1341		51911	44915	75209	78715	70807	63994	15467	23304	14303	20788	14961	20758	24588	20602	34930	21057	10517	21063
HmN_000138600	1380		14	10	32	24	31	22	98	163	117	2	3	7	333	215	439	81	47	6
HmN_000138700	351		499	440	708	733	817	734	21	42	33	86	34	49	142	27	56	37	12	27
HmN_000138800	1530		0	2	0	2	0	2	2790	3894	3497	8	24	43	8431	6240	10973	2227	911	183
HmN_000138900	1101		213	191	251	323	236	220	115	195	115	254	200	287	236	80	129	142	50	196
HmN_000139000	1224		137	146	212	188	208	164	171	235	174	530	365	576	128	142	219	354	238	550
HmN_000139100	1851		6	3	2	3	4	5	100	131	104	0	2	3	271	218	357	82	26	10
HmN_000139200	936		174	157	276	242	234	235	57	82	57	57	24	42	148	103	195	34	21	17
HmN_000139300	585		1290	1063	1976	2107	1934	1714	434	610	417	844	627	988	997	643	740	525	373	709
HmN_000139400	2220		502	473	884	851	721	685	372	520	365	436	362	447	567	347	551	677	366	506
HmN_000139500	1893		75	49	101	118	71	97	51	66	65	103	96	122	79	29	58	82	34	56
HmN_000139600	480		0	0	0	0	1	0	246	476	511	0	4	12	1029	751	746	203	149	25
HmN_000139700	1080		203	199	302	338	281	233	113	210	128	202	107	158	204	117	240	231	133	242
HmN_000139800	2121		1895	1684	2789	3017	2689	2355	1053	1631	1113	2351	1542	2325	1957	1461	1873	1353	846	1300
HmN_000139900	891		0	0	0	0	0	0	904	1254	1177	2	20	12	3110	2389	3698	785	327	78
HmN_000140000	1788		1678	1519	2702	2873	2293	2138	1196	1534	1123	1748	1144	1565	1488	1244	1853	2215	1289	2650
HmN_000140100	699		1122	970	1643	1705	1565	1409	574	905	702	822	656	1152	1755	1608	1645	812	399	669
HmN_000140200	375		0	2	0	2	2	1	0	0	0	0	0	0	0	0	0	0	0	0
HmN_000140300	363		0	0	0	0	3	1	0	0	0	0	0	0	0	0	2	0	0	0
HmN_000140700	297		6	2	5	4	3	8	0	0	2	5	1	3	0	1	0	1	1	3
HmN_000140800	1764		2	0	1	3	4	3	0	1	1	1	0	0	2	2	3	3	0	0
HmN_000140900	324		0	0	0	0	0	0	0	0	0	0	0	0	0	0	0	0	0	0
HmN_000141000	390		2	1	3	2	1	1	1	1	0	0	0	0	0	0	0	1	0	0
HmN_000141300	423		0	0	0	0	0	2	6	14	9	1	0	0	15	13	39	10	2	1
HmN_000141500	864		0	0	0	0	1	1	0	0	0	0	0	0	0	0	1	1	0	0
HmN_000141700	213		3	2	5	3	0	1	0	0	0	2	0	0	0	0	0	0	0	0
HmN_000141900	1539		0	2	0	2	2	0	0	0	0	0	0	0	0	0	0	0	0	0
HmN_000142000	3261		0	0	0	2	0	0	0	0	0	0	0	0	0	0	2	0	0	0
HmN_000142200	1263		0	0	0	0	0	0	6	1	2	3	4	0	0	2	4	4	3	11
HmN_000142300	1146		2	0	0	0	0	0	18	68	57	5	3	18	184	137	143	66	36	17
HmN_000142400	13092		496	371	678	827	616	526	209	376	280	879	545	664	411	296	489	377	222	376
HmN_000142500	564		826	672	1174	1180	1153	1039	652	954	527	968	924	1267	984	934	1128	988	683	1417
HmN_000142600	7368		1558	1452	2557	2657	2193	2078	1142	2166	1180	1496	1106	1535	2245	2044	2697	1749	819	1265
HmN_000142700	885		9	27	44	32	22	31	50	76	51	24	12	15	129	91	203	81	43	10
HmN_000142800	1074		670	581	1052	1078	935	829	302	519	347	595	414	598	748	621	824	400	187	302
HmN_000142900	4236		410	376	635	618	566	518	315	464	284	679	366	567	441	324	572	441	284	568
HmN_000143000	1164		67	43	61	62	75	43	82	156	86	488	385	491	103	108	192	119	72	92
HmN_000143100	717		179	159	289	308	233	265	68	89	32	103	58	84	80	62	99	70	17	35
HmN_000143200	2172		654	529	947	966	924	760	325	615	392	1255	953	1513	760	643	931	445	249	417
HmN_000143300	2577		307	288	381	409	375	273	373	625	449	1508	1032	1405	801	599	817	792	417	685
HmN_000143400	5916		602	562	868	905	766	768	429	705	445	719	439	591	741	607	864	803	415	636
HmN_000143500	255		0	0	0	0	1	0	0	0	0	0	0	0	0	0	0	0	0	0
HmN_000143600	1431		616	565	1087	1100	995	866	477	770	357	516	376	507	647	420	808	530	264	520
HmN_000143700	1017		993	819	1458	1467	1314	1239	574	868	516	872	493	741	871	609	938	1001	680	1156
HmN_000143800	4275		699	596	1146	1117	962	825	271	372	206	392	275	416	595	483	718	272	123	223
HmN_000143900	948		0	0	0	3	1	2	157	247	185	0	6	0	947	775	644	206	79	5
HmN_000144100	300		0	0	0	0	1	0	0	1	0	0	0	0	0	0	1	0	0	0
HmN_000144200	777		2	0	1	0	1	1	209	285	267	0	8	6	1288	1049	987	256	126	10
HmN_000144300	759		52	49	81	76	63	73	4	26	1	20	9	33	12	13	16	2	0	3
HmN_000144400	396		0	0	0	0	0	0	0	0	0	0	0	0	0	1	0	0	0	0
HmN_000144500	2157		1	2	7	3	2	2	15	37	0	0	0	1	2	1	5	44	11	24
HmN_000144600	1680		574	497	977	944	842	787	313	586	382	640	495	689	649	512	873	506	276	456
HmN_000144700	1911		1565	1369	2499	2690	2311	1973	620	1023	644	1357	1071	1668	1060	964	1445	776	432	657
HmN_000144800	2625		1159	949	2007	2116	1601	1433	342	584	365	887	633	808	651	604	950	535	280	361
HmN_000144900	339		19	14	18	32	17	25	45	72	67	3	7	2	325	85	103	44	18	8
HmN_000145000	1053		0	0	2	1	0	0	266	348	270	5	13	29	742	578	1154	180	94	15
HmN_000145100	1044		15	11	11	27	20	11	557	853	773	15	33	40	2242	1423	2315	506	177	39
HmN_000145200	1056		18	8	15	25	19	25	442	623	649	62	39	48	1449	995	1562	328	160	66
HmN_000145300	1368		406	358	682	715	644	597	213	318	224	468	338	396	351	374	529	291	154	236
HmN_000145400	2118		4	0	4	0	7	4	380	545	481	0	13	10	1523	1526	1455	397	95	17
HmN_000145500	1689		2264	1980	3755	3834	3235	3086	425	747	466	1431	992	1220	1090	927	1292	603	273	557
HmN_000145600	2205		78	64	138	146	119	96	63	92	67	84	75	105	58	58	122	91	53	117
HmN_000145700	2397		906	827	1700	1689	1362	1303	1019	1431	1096	1545	1052	1313	2199	1942	2307	1518	772	1474
HmN_000145800	354		0	0	0	0	0	0	0	0	0	0	0	0	0	0	0	0	0	0
HmN_000145900	4335		781	585	1159	1075	914	781	470	747	455	406	328	378	1013	1088	1388	583	294	435
HmN_000146000	1320		661	612	1103	1149	996	868	671	972	696	492	406	643	2075	1898	1966	688	311	468
HmN_000146100	1113		1165	960	1937	1914	1728	1435	324	458	332	726	450	707	654	427	675	376	187	340
HmN_000146200	2409		1348	1166	2081	1957	1597	1525	455	811	486	802	659	809	838	690	1090	647	397	444
HmN_000146300	2832		707	628	1214	1274	1038	913	170	286	208	627	479	519	301	298	404	270	148	223
HmN_000146400	1515		298	228	352	499	408	353	148	258	162	240	153	253	457	356	527	192	95	56
HmN_000146500	327		1	0	0	0	3	1	0	0	0	0	0	0	0	0	0	0	0	0
HmN_000146600	1548		278	246	372	465	391	319	12	17	8	46	30	62	10	8	17	8	0	12
HmN_000146700	1515		20	8	38	24	17	21	67	106	94	13	4	2	222	168	306	35	8	3
HmN_000146800	228		0	0	0	0	0	0	0	0	0	0	0	0	0	0	0	0	0	0
HmN_000146900	249		0	0	0	0	0	0	0	0	0	0	0	0	0	0	0	0	0	0
HmN_000147000	684		112	115	199	152	177	174	19	31	24	39	46	69	28	42	47	34	43	25
HmN_000147100	918		289	213	485	430	392	319	119	181	132	277	225	365	168	242	355	178	87	157
HmN_000147200	1656		444	376	745	768	641	655	195	181	111	338	297	333	288	239	409	120	57	55
HmN_000147300	2439		639	655	1117	1223	989	826	375	487	385	897	662	860	674	552	817	646	401	546
HmN_000147400	240		0	0	0	0	0	0	0	0	0	0	0	0	0	0	0	0	0	0
HmN_000147500	213		0	0	0	0	0	1	0	0	0	0	0	0	0	0	0	0	0	0
HmN_000147600	315		0	0	0	0	0	0	0	0	0	0	0	0	0	0	0	0	0	0
HmN_000147700	2658		20	24	38	46	33	42	12	18	12	48	31	35	33	21	37	23	8	31
HmN_000147800	4893		320	303	470	555	417	394	362	515	445	820	555	836	630	503	923	681	394	605
HmN_000147900	582		397	367	724	713	608	567	228	340	267	651	440	696	326	220	372	426	239	484
HmN_000148000	423		0	0	0	0	0	0	0	0	0	0	0	0	0	0	0	0	0	0
HmN_000148200	960		0	0	0	0	0	0	0	0	0	0	0	0	0	0	0	0	0	0
HmN_000148300	2697		526	500	847	908	801	744	583	909	495	1013	718	1030	627	471	815	1392	734	1259
HmN_000148600	276		0	0	1	0	0	0	0	0	0	2	0	0	0	0	0	0	0	0
HmN_000148700	1722		107	133	217	236	203	177	309	431	344	372	301	365	708	541	859	495	300	464
HmN_000148800	912		951	767	1338	1390	1318	1098	391	663	590	715	639	1013	1616	1674	1522	497	296	352
HmN_000148900	720		24	25	38	56	33	39	295	426	229	173	122	138	483	271	230	499	252	764
HmN_000149000	723		37	26	57	44	39	42	117	318	153	1087	716	1067	251	173	222	373	202	455
HmN_000149100	747		262	229	363	357	320	286	342	529	221	2	5	4	103	62	36	2046	1324	2478
HmN_000149200	906		0	0	2	0	6	0	296	510	486	2	5	11	1173	888	1336	278	141	36
HmN_000149400	720		31	22	36	45	38	22	63	67	70	0	0	3	90	110	224	33	7	8
HmN_000149500	591		495	428	715	726	735	655	409	577	555	429	301	504	1351	1083	2069	360	139	136
HmN_000149600	1725		457	386	820	864	698	672	193	323	185	609	373	457	339	286	496	288	148	281
HmN_000149700	1191		1242	1071	1477	1552	1548	1381	1478	2527	1636	2007	1508	2235	2396	1829	3053	2390	1507	2288
HmN_000149900	1323		128	88	215	209	177	188	63	161	96	111	87	122	192	192	234	117	66	81
HmN_000150000	321		9004	7509	14537	15239	16142	14588	86	255	199	504	177	343	682	106	180	98	72	69
HmN_000150100	282		6045	4798	8937	9181	8428	7525	62	118	75	241	117	180	289	62	100	88	51	91
HmN_000150200	783		2002	1815	2928	3143	2550	2315	902	1358	979	2223	1801	2299	1965	1919	2494	935	459	559
HmN_000150300	1446		572	491	887	991	873	723	410	713	494	217	175	229	1398	1905	2156	274	86	135
HmN_000150400	783		251	215	359	437	403	283	166	250	168	233	200	304	370	271	339	273	147	115
HmN_000150500	456		0	0	0	0	0	0	1	0	3	0	0	0	4	7	6	2	0	0
HmN_000150600	267		0	0	0	0	0	0	0	0	0	0	0	0	0	0	0	0	0	0
HmN_000150700	702		308	287	458	440	367	365	40	81	44	199	125	235	66	31	48	61	28	74
HmN_000150800	363		1198	947	1717	1797	1829	1430	10	35	23	141	53	71	95	21	7	19	7	16
HmN_000150900	4818		839	724	1298	1377	1160	1033	777	1151	681	968	669	996	1084	932	1301	1157	675	1263
HmN_000151000	648		1588	1306	2288	2504	2362	2005	516	1107	663	1101	850	1139	1335	718	1206	982	570	1122
HmN_000151100	603		1791	1522	2516	2730	2509	2299	1758	2647	1824	2091	1430	2352	3308	2232	3069	3706	2465	4969
HmN_000151200	714		1007	789	1513	1457	1295	1186	626	1032	721	1083	720	971	1193	775	1295	1333	712	1262
HmN_000151300	3972		1579	1421	2452	2433	2067	1916	839	1194	679	1102	731	1012	1152	951	1509	1451	846	1342
HmN_000151400	3723		2138	1742	3049	3274	2520	2358	710	1090	667	1025	730	905	1484	1350	1634	1012	494	730
HmN_000151500	1185		582	510	779	954	721	627	306	614	343	659	408	657	553	365	633	529	365	623
HmN_000151600	1620		1160	1046	2070	2170	1854	1569	226	331	167	861	774	808	334	284	441	176	64	85
HmN_000151700	2541		395	280	570	636	474	387	481	669	466	576	461	628	580	401	597	634	295	931
HmN_000151800	546		2307	2093	3464	3702	3284	2921	1747	2509	1524	2207	1510	2137	2760	2182	2854	3270	1990	3641
HmN_000151900	2517		1119	882	1784	1872	1481	1297	466	858	401	1827	1284	1528	514	409	696	995	569	987
HmN_000152000	972		0	4	4	4	3	2	36	67	21	2	0	3	57	24	30	48	20	69
HmN_000152100	783		1362	1149	1922	2163	1889	1633	791	1130	831	955	701	1144	2080	2171	2316	984	510	872
HmN_000152200	1410		2713	2463	4302	4164	3553	3346	1356	2215	1781	2413	1635	2570	2415	1913	3480	3396	1930	3091
HmN_000152300	1830		118	87	190	170	113	131	181	229	216	79	61	78	486	343	641	161	59	32
HmN_000152400	921		32	45	69	64	62	57	54	76	61	15	12	17	156	101	229	38	17	27
HmN_000152500	2526		325	232	491	511	427	380	122	140	83	207	126	206	252	153	323	108	67	63
HmN_000152600	1023		1040	956	1668	1793	1682	1421	230	355	242	533	361	613	494	377	573	346	173	265
HmN_000152700	936		3762	3170	5526	5899	5342	4872	1327	1842	1389	1778	1321	2056	2002	1668	2357	2311	1513	2704
HmN_000152800	2385		508	431	788	853	736	673	336	542	369	551	334	564	617	506	765	523	356	517
HmN_000152900	201		224	179	347	328	227	229	70	81	75	125	36	65	237	45	44	66	49	99
HmN_000153000	885		371	297	614	660	491	475	256	446	292	424	245	345	548	506	658	497	264	371
HmN_000153100	711		24354	21359	33259	34901	30225	27759	5792	9446	6747	14134	9249	13580	11250	7382	10891	8021	5144	8244
HmN_000153200	2913		499	472	897	933	704	647	756	1055	846	541	419	502	2448	2283	2728	826	314	380
HmN_000153300	2229		998	859	1559	1614	1360	1288	405	648	389	884	559	778	641	531	908	786	468	626
HmN_000153400	1470		87	97	134	135	119	84	42	81	54	6	26	52	145	93	230	40	21	49
HmN_000153500	1437		113	82	158	113	118	97	2391	3689	2817	2895	1829	3016	3390	2298	2988	3673	2566	4110
HmN_000153600	1461		7098	6070	9729	9819	9520	8588	3620	6714	2018	384	269	409	5049	2712	3211	5173	2305	6066
HmN_000153700	1677		646	608	1153	1124	891	830	268	430	289	501	324	500	557	340	636	357	235	348
HmN_000153800	348		0	0	0	0	0	0	0	0	0	0	0	0	0	0	0	0	0	0
HmN_000153900	618		0	0	0	0	0	0	0	0	0	0	0	0	0	0	0	0	0	0
HmN_000154000	1326		565	575	901	1018	860	806	796	1241	891	1550	972	1683	1331	922	1288	1300	922	1320
HmN_000154100	594		502	390	666	738	638	579	340	483	440	1106	636	1042	973	419	418	363	338	440
HmN_000154200	3954		771	700	1236	1330	1118	1019	285	520	267	681	541	800	557	451	729	472	231	350
HmN_000154300	2400		519	401	714	725	571	532	177	303	215	982	614	799	370	274	366	249	153	291
HmN_000154400	600		118	85	174	180	150	123	7	5	6	27	20	28	9	7	8	12	9	18
HmN_000154500	1314		572	487	891	1022	742	657	195	391	196	1036	635	1047	510	362	486	242	160	192
HmN_000154600	1428		459	388	710	762	599	534	210	347	210	500	265	493	290	202	390	352	244	449
HmN_000154700	903		74	48	151	128	97	84	54	89	68	102	75	102	72	75	81	67	58	107
HmN_000154800	1959		521	421	836	937	688	587	606	991	445	570	363	548	741	528	798	1150	613	1170
HmN_000154900	276		1298	1070	2185	2291	2193	1889	9	39	30	37	25	42	64	19	29	13	4	8
HmN_000155000	699		7	3	2	1	2	1	3	10	9	5	8	6	8	3	7	4	4	4
HmN_000155100	750		0	3	0	2	2	0	1	7	1	11	3	5	1	2	3	5	0	1
HmN_000155200	2154		146	161	222	252	207	135	65	106	65	135	74	119	100	70	141	110	73	100
HmN_000155300	3495		658	559	1120	1064	923	751	464	689	456	725	461	636	1078	992	1415	600	294	326
HmN_000155400	2916		310	260	445	483	386	364	213	331	211	285	259	361	267	220	344	390	181	292
HmN_000155500	2739		6	2	2	8	6	4	1	3	1	3	1	4	6	2	4	1	1	1
HmN_000155600	435		0	0	0	0	0	0	0	0	0	0	0	0	0	0	0	0	0	0
HmN_000155700	942		70	63	110	135	128	107	355	593	230	176	107	131	306	189	270	524	329	925
HmN_000155800	2160		948	819	1338	1444	1396	1276	1060	1524	1212	2019	1420	2666	2192	1579	2519	1802	1402	2536
HmN_000155900	507		0	0	0	0	1	0	0	0	0	0	0	0	0	0	0	0	0	0
HmN_000156000	921		1152	1076	1813	1954	1825	1549	364	602	390	1070	828	1058	719	543	884	453	300	364
HmN_000156100	1614		826	616	1215	1315	1066	931	246	421	298	485	354	553	670	630	776	325	196	239
HmN_000156200	2313		345	355	528	536	443	381	88	199	94	319	260	340	216	180	238	94	74	116
HmN_000156300	1785		31	25	40	53	35	35	36	95	51	195	169	215	51	76	120	69	30	49
HmN_000156400	1368		1571	1386	2480	2560	2228	2075	443	702	473	832	660	810	1017	996	1097	546	288	389
HmN_000156500	1956		11743	9886	16560	17285	17982	15906	316	574	436	2793	1493	1795	1264	403	597	405	239	382
HmN_000156600	174		0	0	0	0	0	0	0	0	0	0	0	0	0	0	0	0	0	0
HmN_000156700	423		1	0	0	0	1	1	6	13	13	0	1	0	39	13	25	2	0	0
HmN_000156800	2427		242	205	467	367	351	315	119	184	120	149	121	169	273	198	445	136	91	56
HmN_000156900	1131		870	741	1309	1423	1238	1133	300	390	277	762	469	735	524	387	631	360	251	257
HmN_000157000	2358		141	144	152	218	149	131	36	58	31	243	170	279	63	47	92	50	25	45
HmN_000157100	744		701	566	994	1026	1015	953	66	115	75	228	85	109	370	81	74	85	84	127
HmN_000157200	678		333	318	517	551	477	420	124	254	183	263	172	263	292	207	315	186	99	74
HmN_000157300	1242		8	9	15	12	15	11	1267	1997	1268	1070	728	916	1363	986	1317	3207	1575	3327
HmN_000157400	3993		29	20	40	32	28	34	434	657	524	92	77	69	1221	870	1664	431	168	132
HmN_000157500	366		911	803	1155	1247	1136	967	63	106	61	179	54	84	250	57	68	76	49	85
HmN_000157600	1422		809	673	1325	1434	1279	1217	589	843	665	1278	1087	1719	1303	1184	1502	663	423	657
HmN_000157700	726		2	0	0	0	3	1	79	130	118	0	2	2	317	190	318	69	44	7
HmN_000157800	2493		473	509	874	833	802	718	197	320	133	648	435	510	269	208	292	222	89	197
HmN_000157900	2205		1579	1427	2318	2297	1780	1745	1306	2161	1701	5928	4359	4997	1851	1755	2998	2601	1456	2512
HmN_000158000	972		700	620	1136	1194	1164	1006	132	246	191	499	272	422	317	226	341	129	118	136
HmN_000158100	990		130	110	274	274	196	224	27	50	48	208	156	182	56	22	75	30	23	45
HmN_000158200	471		0	0	0	0	0	0	0	0	0	0	0	0	0	0	0	0	0	0
HmN_000158300	888		218	199	349	377	341	288	105	167	129	345	220	340	191	178	220	186	132	276
HmN_000158400	1011		190	137	287	294	238	235	66	52	48	209	191	266	97	57	140	87	41	85
HmN_000158500	2910		501	472	867	937	780	645	877	1323	874	1064	738	1050	1024	682	1138	2148	1179	2525
HmN_000158600	1917		1348	1045	1900	1918	1650	1513	512	830	555	847	636	914	942	663	1104	906	574	874
HmN_000158700	1167		488	438	822	828	629	636	174	391	213	440	277	420	454	395	545	308	163	301
HmN_000158800	933		223	220	396	410	376	308	69	172	109	201	118	224	172	129	218	148	79	78
HmN_000158900	5688		999	863	1641	1724	1512	1344	677	1020	633	928	683	1052	1012	926	1329	1107	645	1023
HmN_000159000	618		528	416	725	894	803	644	179	287	198	524	274	527	377	236	352	176	187	333
HmN_000159100	876		3763	3241	5769	5910	5472	5103	742	1305	899	1693	1262	1835	1574	1123	1563	1162	605	752
HmN_000159200	678		108	109	228	218	193	181	291	347	346	93	54	83	886	665	1537	203	84	43
HmN_000159300	261		2	2	6	5	9	1	0	0	0	0	1	0	0	0	1	0	1	1
HmN_000159400	1362		100	74	115	145	103	78	90	131	91	97	85	102	85	56	132	282	197	225
HmN_000159500	723		0	0	0	0	0	0	0	0	0	0	0	0	0	1	0	0	0	0
HmN_000159700	837		2025	1752	3000	3061	2765	2474	1186	2018	1149	5151	2667	4770	2001	1766	2262	2784	1664	2884
HmN_000159800	678		311	330	610	640	532	483	95	208	119	384	260	435	154	130	169	182	131	180
HmN_000159900	1683		402	322	541	494	360	379	461	890	692	2131	1272	2077	984	788	1181	1428	1002	1696
HmN_000160000	1173		1621	1336	2238	2341	1958	1781	262	429	397	2993	1878	2828	357	223	482	151	193	220
HmN_000160100	1314		396	375	657	675	633	565	213	363	222	483	333	563	389	249	467	310	221	391
HmN_000160200	1155		1233	967	1722	1802	1614	1386	187	341	258	336	258	334	582	557	597	299	151	212
HmN_000160300	606		2	2	4	2	5	2	51	65	41	0	1	2	133	171	310	38	24	4
HmN_000160400	249		532	439	598	592	503	435	221	495	352	333	220	405	663	328	373	376	284	421
HmN_000160500	654		120	96	144	151	114	120	69	133	70	194	91	162	157	71	75	91	87	150
HmN_000160600	2241		184	143	261	305	210	157	376	568	538	777	468	691	502	441	762	983	517	866
HmN_000160700	678		287	228	394	408	347	361	313	452	291	427	214	359	707	483	811	342	211	338
HmN_000160800	1251		605	471	820	895	728	670	166	281	215	359	218	307	486	361	454	227	97	162
HmN_000160900	327		1503	1313	2019	2264	2249	2195	54	153	103	233	83	159	382	107	161	112	64	68
HmN_000161000	1962		51	79	112	119	89	60	143	208	116	163	120	128	438	337	315	180	63	110
HmN_000161100	3933		342	352	611	647	484	428	235	352	203	271	261	306	294	273	410	448	229	293
HmN_000161200	1098		837	678	1201	1221	1099	1022	236	357	254	555	413	640	408	442	526	292	165	291
HmN_000161300	4212		897	714	1275	1333	1066	991	310	468	299	576	363	499	505	457	687	492	271	449
HmN_000161400	255		0	0	0	0	0	0	2	2	0	0	0	0	1	1	0	2	0	1
HmN_000161500	3147		3933	3386	5442	5638	4434	4197	5294	7325	4266	9981	7892	8186	5362	4346	8071	8796	4570	7431
HmN_000161600	1620		1857	1515	2691	2877	2379	2194	1316	1917	1234	1760	1190	1737	2007	1822	2711	1952	1018	1588
HmN_000161700	3093		6558	5597	9814	10310	8380	7569	1313	2139	1446	4066	3652	3457	1797	1600	3017	1944	1126	1714
HmN_000161800	1968		138	94	148	188	133	137	236	422	230	174	110	209	714	441	592	260	158	90
HmN_000161900	2199		109	80	114	137	116	110	383	608	494	423	309	427	443	380	657	846	575	854
HmN_000162000	660		13299	11197	17864	18661	17936	16183	4826	8421	6278	8166	7083	11806	10564	7453	8535	6992	4034	4577
HmN_000162100	837		7	8	9	12	15	6	696	1003	980	21	18	43	2451	1709	2800	484	237	66
HmN_000162200	723		414	339	579	580	569	500	341	438	254	245	188	297	347	247	399	679	459	744
HmN_000162300	1842		224	192	307	392	375	326	156	230	161	373	235	395	309	237	336	279	126	283
HmN_000162400	2688		1865	1610	3060	3020	2781	2593	1632	2607	1414	1841	1264	1888	2404	2143	2999	4125	3025	3130
HmN_000162500	675		911	751	1236	1242	1111	1096	180	299	264	334	270	484	352	308	558	323	165	269
HmN_000162600	510		0	2	0	0	1	0	0	0	2	0	0	7	2	0	18	0	0	6
HmN_000162700	588		2588	2266	3472	3693	3846	3450	1586	2188	1603	2839	2554	3571	2952	2631	4551	2419	1362	2217
HmN_000162800	1362		0	0	0	0	0	0	75	133	139	235	130	204	159	62	244	210	132	204
HmN_000162900	480		216	152	281	285	250	245	30	87	78	94	39	42	361	41	57	66	47	53
HmN_000163000	765		813	767	1322	1294	1146	908	316	435	292	454	354	522	737	762	842	348	210	355
HmN_000163100	1536		345	287	599	554	500	444	168	261	188	339	256	371	319	215	427	205	133	202
HmN_000163200	5298		1599	1350	2495	2698	2133	2035	1171	1843	1212	1576	1185	1531	2622	2731	3523	1569	764	1179
HmN_000163300	1632		406	366	509	552	496	487	231	310	264	531	379	557	283	223	351	341	175	513
HmN_000163400	1683		851	700	1306	1390	1172	1099	778	1195	1002	1013	714	1007	2623	2494	2881	654	333	403
HmN_000163500	894		146	166	242	294	207	254	163	266	169	273	191	279	453	415	468	200	82	115
HmN_000163600	1545		370	275	582	645	546	529	193	314	217	425	268	481	442	378	562	218	146	175
HmN_000163700	1179		1233	1071	1673	1735	1415	1300	527	949	602	964	689	939	1067	813	1335	958	454	842
HmN_000163800	345		1044	859	1525	1691	1607	1521	41	74	57	96	53	80	173	24	57	46	29	34
HmN_000163900	855		1446	1208	2203	2345	2137	1951	646	1020	805	1180	941	1504	1313	1226	1571	896	546	908
HmN_000164000	1605		362	413	602	657	530	497	222	409	234	338	187	295	324	229	356	460	285	609
HmN_000164100	6432		464	412	806	755	632	577	192	306	104	209	173	228	156	130	225	300	136	321
HmN_000164200	2433		280	217	441	394	284	271	154	287	172	434	289	427	249	205	309	327	217	238
HmN_000164300	1566		118	72	142	154	152	124	12	19	20	108	65	123	16	10	33	11	11	16
HmN_000164400	5991		1792	1423	2810	2690	2357	2217	1002	1504	1072	1417	961	1198	2192	2025	2773	1495	756	1196
HmN_000164500	570		63	60	98	108	112	108	111	133	111	143	99	169	132	108	136	167	126	252
HmN_000164600	2265		42	47	101	105	68	84	53	85	32	142	77	107	91	59	82	84	37	62
HmN_000164700	2223		100	61	170	144	112	108	22	32	17	82	103	55	13	7	22	13	6	26
HmN_000164800	2424		124	144	249	221	209	153	254	405	309	575	421	540	535	556	755	463	204	359
HmN_000164900	3000		279	208	411	419	346	334	120	141	78	195	157	226	185	166	301	79	60	57
HmN_000165000	4392		1070	840	1534	1874	1504	1248	685	1178	624	927	654	770	1282	1140	1531	1025	531	861
HmN_000165100	666		975	827	1420	1541	1395	1294	541	1107	657	927	553	861	1088	770	1062	1252	716	1170
HmN_000165200	225		244	208	258	249	235	219	13	17	15	106	49	64	43	17	22	21	13	16
HmN_000165300	375		0	0	0	0	1	1	1	1	0	0	0	0	0	0	0	0	0	1
HmN_000165400	765		0	1	0	0	3	4	12	9	9	0	0	0	24	7	3	8	3	12
HmN_000165500	240		103	86	163	152	89	69	14	22	15	73	33	45	19	5	9	13	3	17
HmN_000165600	753		0	0	0	0	0	0	90	135	98	2	1	3	517	585	331	80	21	2
HmN_000165700	432		0	0	0	0	2	0	14	46	53	0	2	0	165	19	25	6	2	0
HmN_000165800	5544		689	514	1026	962	853	767	338	606	245	514	412	423	554	417	496	437	243	506
HmN_000165900	573		0	0	2	0	1	1	120	139	141	0	4	5	679	595	332	174	30	3
HmN_000166000	2061		6610	5582	9477	9574	8370	7663	3490	5525	4461	7419	5804	7787	7749	5811	9898	4341	2561	3421
HmN_000166100	1098		26	20	34	34	33	26	3	23	14	30	12	26	18	11	22	6	10	6
HmN_000166200	1215		516	499	914	998	868	679	165	232	177	436	385	608	328	288	383	227	134	129
HmN_000166250	2412		1027	857	1630	1786	1505	1370	456	784	578	1293	938	1421	831	623	1287	535	343	396
HmN_000166300	2985		3062	2595	4691	4533	4013	3608	1958	2883	1843	3262	2222	2801	2875	2175	3454	3462	2101	3310
HmN_000166400	3327		4	4	6	2	6	4	44	91	60	75	46	70	68	23	95	29	32	27
HmN_000166500	270		9	3	6	18	10	11	2	21	2	27	20	26	25	6	13	6	1	5
HmN_000166600	4227		401	338	685	713	609	543	72	100	72	205	159	151	122	87	132	121	41	78
HmN_000166700	657		3	3	6	8	7	4	75	89	41	80	53	83	79	52	115	73	60	74
HmN_000166800	786		0	0	2	1	0	4	230	415	345	1	8	2	1436	1024	971	253	77	24
HmN_000166900	654		261	245	391	453	412	339	426	627	374	309	185	300	626	412	568	941	700	1179
HmN_000167000	2241		4088	3467	6163	6531	5266	4821	5284	8651	5951	6705	4868	6454	8878	7041	10755	11010	6419	9464
HmN_000167100	723		690	545	992	1080	997	875	321	422	285	403	339	542	497	399	524	435	251	421
HmN_000167200	717		367	283	537	549	470	412	434	536	414	766	445	777	745	502	820	558	400	534
HmN_000167300	285		0	0	0	0	0	2	0	1	0	0	0	0	0	0	0	0	0	0
HmN_000167400	1128		856	793	1285	1340	1268	1082	114	210	149	475	331	472	274	239	236	147	70	120
HmN_000167500	216		0	0	0	0	1	0	0	0	0	0	0	0	1	0	0	0	0	2
HmN_000167600	3369		2311	2009	3541	3514	2735	2560	1134	2262	1653	3842	3144	3582	2029	1908	3201	1874	1170	1561
HmN_000167700	1023		0	2	4	2	2	0	360	452	454	11	21	23	2170	1383	1441	369	144	27
HmN_000167800	1014		72	82	125	160	150	119	246	416	290	357	237	340	755	653	821	335	144	272
HmN_000167900	2265		1236	1163	2140	2167	1872	1560	602	1010	696	974	768	1080	1354	1047	1567	823	481	723
HmN_000168000	264		31	37	51	32	58	38	17	46	32	55	28	40	105	21	14	14	12	28
HmN_000168100	1452		708	619	986	1098	986	917	457	542	521	481	435	497	1374	1456	1588	383	161	110
HmN_000168200	1041		3238	2836	4374	4618	4519	4028	2216	3533	2310	4039	3274	4689	4608	3462	5058	3922	2295	2870
HmN_000168300	1773		1155	976	1670	1736	1459	1404	550	912	650	1933	1542	2011	1169	778	1422	611	427	453
HmN_000168400	1470		1055	880	1456	1673	1371	1235	337	465	341	996	691	987	590	479	635	411	262	374
HmN_000168500	1611		657	584	947	924	868	761	411	679	474	658	425	751	1064	842	1115	848	446	825
HmN_000168600	1182		610	561	901	1047	864	731	325	437	329	724	539	737	496	402	473	424	269	484
HmN_000168700	600		511	455	763	770	713	681	213	351	309	439	340	520	477	455	721	285	177	239
HmN_000168800	4074		1233	1165	2037	2138	1560	1503	858	1408	696	1151	840	1036	1370	1231	1711	1348	768	1226
HmN_000168900	1113		403	377	730	671	602	509	302	437	329	341	189	311	761	670	730	405	209	381
HmN_000169000	1029		1932	1737	3005	3146	2934	2452	866	1523	1117	1723	1110	1844	1641	1104	1463	1346	894	1438
HmN_000169100	2625		537	442	699	779	632	595	1057	1564	1454	4639	3127	4593	1780	1268	2315	1931	1101	1619
HmN_000169200	486		258	193	349	395	302	307	237	458	348	1130	483	866	725	323	342	291	221	266
HmN_000169300	1455		1027	894	1665	1755	1394	1268	365	650	363	848	676	921	721	586	947	622	329	646
HmN_000169400	1290		620	575	1089	1116	907	855	278	345	284	721	545	657	509	481	632	391	231	309
HmN_000169500	2025		371	281	617	634	533	487	381	555	401	406	343	449	775	667	823	603	308	267
HmN_000169600	969		161	162	265	294	222	195	114	183	110	525	357	647	209	164	291	148	84	141
HmN_000169700	387		0	0	1	2	0	2	0	0	0	0	0	0	0	0	0	0	0	0
HmN_000169800	381		0	0	0	0	0	0	0	0	0	0	0	0	0	0	0	0	0	0
HmN_000169900	2538		319	261	501	536	480	435	164	229	179	264	190	248	404	392	489	188	60	80
HmN_000170000	3405		450	363	656	712	555	493	217	242	196	552	402	430	321	250	433	254	94	186
HmN_000170100	2682		951	833	1589	1687	1328	1156	277	539	322	505	329	513	670	422	898	280	145	193
HmN_000170200	312		0	0	0	0	1	0	0	0	0	0	0	0	0	0	1	0	0	0
HmN_000170300	453		0	0	0	0	0	0	0	0	0	0	0	0	0	0	0	0	0	0
HmN_000170400	438		0	0	1	0	0	0	0	0	4	1	0	0	13	0	0	2	0	0
HmN_000170500	7617		517	510	946	920	811	644	190	301	175	330	205	285	273	221	431	290	176	270
HmN_000170600	699		0	0	0	2	6	1	0	0	0	1	2	0	0	0	0	1	0	0
HmN_000170700	375		0	0	2	0	0	0	1	0	0	0	0	0	0	0	0	0	0	0
HmN_000170800	447		0	0	0	0	0	0	0	0	0	0	0	0	0	0	0	0	0	0
HmN_000170900	933		5919	5200	8535	8941	8536	7768	11188	14700	9033	5917	3505	5767	13700	10387	13282	25352	17308	25177
HmN_000171000	954		388	337	566	608	610	510	345	433	259	462	455	574	562	312	484	374	252	307
HmN_000171100	975		52	56	94	87	106	65	107	227	67	0	2	0	129	33	40	187	113	209
HmN_000171200	1758		540	438	686	793	669	663	962	1657	1135	1561	1053	1626	1975	1587	2162	1678	1070	1592
HmN_000171300	216		356	333	679	718	599	444	14	19	19	45	26	32	35	13	32	8	5	11
HmN_000171400	621		2797	2320	4233	4316	3769	3524	1237	1999	1491	2573	1656	2614	2494	1921	2716	2330	1407	2401
HmN_000171500	1044		980	800	1325	1361	1206	1087	323	567	361	653	478	671	598	528	760	460	305	456
HmN_000171600	1617		2664	2281	3500	3885	3276	3069	1414	2668	1949	2111	1205	2047	4404	2695	2748	2667	1648	2749
HmN_000171700	1272		6	7	15	2	7	8	609	858	723	9	8	17	1826	2211	3075	324	99	23
HmN_000171800	3030		2708	2409	4444	4338	3820	3486	1909	2917	1541	3023	2483	2709	2631	2254	3468	2940	1533	2741
HmN_000171900	2358		432	300	659	653	613	508	239	330	197	173	171	143	537	518	736	207	58	90
HmN_000172000	570		815	749	1405	1554	1414	1226	326	542	425	1181	780	1250	940	579	818	512	334	511
HmN_000172100	1695		1982	1648	3096	3143	2879	2710	905	1559	753	1209	791	1367	1559	1181	1732	1681	1120	1999
HmN_000172200	5160		1390	1172	2125	2018	1724	1557	174	427	272	870	647	880	292	210	363	438	243	428
HmN_000172300	510		0	0	0	0	0	0	141	225	241	0	4	12	1766	552	254	87	21	0
HmN_000172400	675		0	0	0	0	0	0	0	0	0	0	0	0	0	0	0	0	0	0
HmN_000172500	1041		2231	1809	3468	3475	3063	2966	798	1327	841	1725	1334	1809	1839	1312	1858	1025	643	977
HmN_000172600	594		174	121	205	228	216	179	55	94	41	139	109	180	125	122	183	84	30	56
HmN_000172700	2157		773	604	1242	1377	1074	1021	421	594	376	620	415	697	779	692	901	676	299	511
HmN_000172800	1551		1418	1170	2135	2179	1700	1576	1389	2596	1562	2487	1649	2539	2589	1839	2318	3193	1951	3467
HmN_000172900	1002		498	380	617	722	581	478	732	1100	860	442	331	471	3451	2474	2416	1039	455	370
HmN_000173000	816		485	360	748	714	585	555	126	235	146	461	381	457	265	157	269	266	164	239
HmN_000173100	1029		909	801	1362	1509	1257	1237	358	536	373	809	589	1005	621	496	866	538	324	525
HmN_000173200	3792		976	879	1426	1486	1356	1273	496	699	531	639	517	907	1107	930	1159	602	362	469
HmN_000173300	264		6684	5417	8404	8747	7283	6396	75	144	121	373	126	224	299	63	96	105	71	50
HmN_000173400	243		0	1	1	0	5	1	0	0	0	1	0	0	0	1	1	2	0	0
HmN_000173500	585		5334	4252	7637	7844	7250	6471	5560	8765	6656	10628	7316	13556	10145	8364	12537	10681	7741	13974
HmN_000173600	249		10	20	10	26	17	10	7	10	4	8	4	5	9	3	18	10	7	12
HmN_000173700	417		479	461	646	731	640	598	195	370	221	396	316	404	388	282	427	380	255	382
HmN_000173800	1647		690	583	980	989	829	853	484	738	582	642	522	667	1064	910	1239	696	381	500
HmN_000173900	228		0	0	0	0	0	0	0	0	0	0	0	0	0	0	0	0	0	0
HmN_000174000	1047		986	950	1535	1541	1404	1255	438	738	424	795	549	818	901	619	1012	700	371	656
HmN_000174100	2034		681	568	1137	1132	915	810	107	172	127	281	209	276	179	173	293	178	93	139
HmN_000174200	432		0	4	1	0	1	0	0	1	0	0	0	0	0	0	0	0	0	0
HmN_000174300	612		0	0	0	0	0	3	95	157	58	2	3	1	8	5	5	285	188	339
HmN_000174400	936		1592	1357	1983	1993	1681	1794	1165	1580	811	1245	684	1002	1888	1253	2008	1996	1397	1732
HmN_000174500	1671		82	112	124	185	147	124	172	261	166	89	61	86	380	218	331	177	103	231
HmN_000174600	4413		942	822	1384	1538	1217	1056	214	349	225	669	624	721	331	260	485	389	151	269
HmN_000174700	1731		86	95	127	144	107	119	32	34	39	75	75	103	32	27	62	48	36	36
HmN_000174800	2754		11484	9384	17611	17820	15376	13929	4819	6769	4638	9225	6777	8654	8074	6122	10000	7344	4402	6174
HmN_000174900	1284		113	125	198	270	179	160	52	88	63	146	83	128	139	95	187	64	35	31
HmN_000175000	435		0	1	0	0	0	2	0	0	1	0	0	0	0	0	1	0	0	0
HmN_000175100	696		43	32	51	52	41	29	14	19	9	62	38	36	18	7	7	17	15	8
HmN_000175200	2199		4975	4224	7483	7929	6352	5877	809	1213	906	1398	853	1249	2046	1497	1839	1380	682	1181
HmN_000175300	624		321	273	541	483	477	469	158	356	248	330	191	380	648	381	391	230	119	227
HmN_000175400	1011		3322	2746	4695	4754	4518	3955	1099	1998	1417	2354	1773	2778	2585	1781	2607	1753	1064	1654
HmN_000175500	2178		567	438	824	852	695	647	50	75	74	371	290	418	72	49	104	89	47	79
HmN_000175600	5298		2517	2131	3590	3558	2948	2712	1478	2741	1453	4795	2885	3735	1886	1332	2323	2977	1525	2516
HmN_000175700	843		1041	890	1586	1664	1413	1343	621	830	581	1715	1387	2167	966	914	1288	891	588	971
HmN_000175800	2571		139	73	161	134	126	119	148	314	148	262	230	234	413	375	350	222	93	244
HmN_000175900	768		0	0	0	0	0	2	84	133	106	2	0	2	381	294	460	89	28	3
HmN_000176000	273		0	0	0	0	0	0	0	0	0	0	0	0	0	0	0	0	0	0
HmN_000176100	915		19	18	29	47	39	24	3	17	8	25	26	28	17	3	27	8	8	12
HmN_000176200	300		251	268	267	307	309	293	1	0	2	0	0	0	0	0	0	8	2	6
HmN_000176300	219		0	0	0	0	0	0	4	7	3	0	1	1	24	21	9	5	0	2
HmN_000176400	1266		3516	3117	4843	5403	4122	3961	2502	3700	2634	4542	2879	4538	4024	3261	4708	4495	2805	5018
HmN_000176500	1875		74598	63744	103057	107198	84155	76839	101199	172397	110558	260947	167222	231850	173633	133560	250285	136365	79344	121879
HmN_000176600	2745		1940	1487	2660	2806	2397	2252	969	1355	932	1763	1345	1775	1552	1377	2270	1388	760	1152
HmN_000176700	804		529	439	854	866	789	729	125	230	143	297	205	319	395	409	487	128	41	97
HmN_000176800	1077		4	16	18	9	8	8	1444	1683	1008	5	5	14	2274	2558	3576	1333	552	721
HmN_000176900	342		90	65	99	133	133	94	0	8	0	0	0	0	0	0	0	13	2	4
HmN_000177000	432		354	349	531	581	468	452	5	11	16	0	0	0	0	0	0	31	24	35
HmN_000177100	480		84	63	112	116	117	89	6	6	5	1	3	4	2	2	0	3	3	22
HmN_000177200	963		486	378	742	776	635	539	1084	1549	1207	1664	1285	1967	1682	1423	2266	1634	945	1728
HmN_000177300	1197		771	750	1104	1139	933	839	1770	2826	1621	2352	1403	2270	3180	2330	3673	3530	2003	3932
HmN_000177400	1560		559	481	895	945	799	672	651	1096	590	916	762	1100	706	808	1121	1872	1167	1239
HmN_000177500	1824		1696	1510	2652	2741	2375	2098	1624	2783	1877	3023	2006	2751	2398	2139	3323	3992	2362	3984
HmN_000177600	3834		2332	1918	3749	3904	3229	2966	1210	2055	1430	2643	1928	2609	2345	2041	3289	1652	837	998
HmN_000177700	591		1	0	0	1	3	0	0	1	0	0	0	0	0	0	0	1	0	0
HmN_000177800	384		1	0	0	0	0	0	3	10	5	2	0	2	10	1	8	8	6	12
HmN_000177900	126		0	0	0	0	0	0	0	0	0	0	0	0	0	0	0	0	0	0
HmN_000178000	129		0	0	0	0	0	0	0	0	0	0	0	0	0	0	0	0	0	0
HmN_000178100	261		0	0	0	0	0	0	4	4	1	0	0	1	25	23	13	3	0	1
HmN_000178200	318		0	0	0	0	0	0	23	42	27	0	0	3	157	146	74	12	1	3
HmN_000178300	1401		0	0	0	0	0	0	0	0	0	0	0	0	0	0	0	0	0	0
HmN_000178400	333		0	0	0	0	0	0	0	0	0	0	0	0	0	0	0	0	0	0
HmN_000178600	402		161	140	254	266	184	170	58	73	49	153	102	158	122	82	131	113	54	92
HmN_000178700	324		0	0	0	0	0	0	0	0	0	0	0	0	0	0	0	0	0	0
HmN_000178800	1056		0	0	0	0	0	3	3	2	0	0	0	0	4	0	0	1	0	0
HmN_000178900	432		0	0	0	0	1	0	38	35	39	0	0	0	63	122	91	12	1	0
HmN_000179100	768		2	1	8	1	6	6	78	62	66	2	3	5	259	245	202	59	6	4
HmN_000179200	210		0	0	0	0	0	0	0	0	0	0	0	0	0	0	0	0	0	0
HmN_000179300	1698		691	593	1073	1203	933	801	295	397	310	513	431	628	757	885	1027	206	99	125
HmN_000179400	534		1766	1409	2072	2126	2260	1798	698	1170	853	1674	1179	2000	1613	1073	1084	986	808	1187
HmN_000179500	510		146	119	222	218	200	215	73	140	104	257	250	399	215	163	202	142	87	153
HmN_000179600	729		412	297	557	615	528	490	211	354	166	390	231	358	376	277	366	322	209	330
HmN_000179700	1449		1316	1267	1988	2116	1810	1587	400	713	488	867	481	705	903	700	944	579	246	449
HmN_000179800	1887		0	0	0	0	0	2	4	10	4	0	0	0	2	4	15	4	4	0
HmN_000180000	1632		162	112	279	237	233	206	146	164	96	207	174	184	165	145	238	149	84	162
HmN_000180100	591		16133	13931	21692	22479	21357	19437	15350	20873	12854	31969	31462	43855	17558	23409	33648	20011	11244	23324
HmN_000180200	579		900	846	1273	1348	1474	1268	6564	23384	13163	59932	22413	54209	31256	11494	8785	11475	10186	8891
HmN_000180300	1302		759	595	1135	1133	912	868	267	518	253	709	459	697	458	320	528	481	309	401
HmN_000180500	747		940	782	1393	1439	1327	1155	533	673	569	775	506	898	1489	1249	1341	521	319	379
HmN_000180600	585		0	0	1	0	21	14	16	8	4	0	2	0	16	2	24	3	10	2
HmN_000180700	144		0	0	0	0	3	2	1	0	1	0	0	1	0	1	0	2	0	0
HmN_000180800	663		0	2	0	0	40	31	2	0	0	0	0	0	0	1	1	3	1	7
HmN_000180900	480		0	0	0	0	0	1	7	30	26	0	1	1	233	55	36	13	1	3
HmN_000181100	1524		1	0	0	0	26	13	1	0	0	0	0	0	0	0	0	0	0	3
HmN_000181200	342		0	0	0	0	4	2	1	0	0	0	0	0	0	0	0	0	0	0
HmN_000181400	105		0	0	0	0	0	0	0	0	0	0	0	0	0	0	0	0	0	0
HmN_000181500	1080		0	0	0	0	5	2	0	1	0	0	0	0	0	0	1	0	0	2
HmN_000181600	207		0	0	0	0	0	6	0	0	0	0	0	0	0	0	0	1	0	0
HmN_000181700	198		0	0	0	0	1	3	0	0	0	1	0	0	0	0	0	0	0	0
HmN_000181800	585		0	0	0	0	9	3	0	0	0	0	0	0	0	0	1	3	0	0
HmN_000182300	282		0	0	0	0	13	5	0	0	0	0	0	1	0	0	0	0	0	0
HmN_000182400	1971		1	1	0	4	52	50	3	3	1	0	2	0	0	2	2	5	5	6
HmN_000183100	327		0	0	0	0	0	0	0	0	0	0	0	0	0	0	0	0	0	1
HmN_000183300	273		0	0	0	0	6	6	0	0	0	0	0	0	0	0	0	2	0	3
HmN_000183500	597		0	0	0	0	0	0	0	0	0	0	0	0	0	0	0	0	0	0
HmN_000183600	504		0	0	0	0	0	0	8	3	10	0	0	0	25	50	21	8	0	0
HmN_000183700	1026		0	0	0	2	0	0	2	14	8	4	2	2	20	0	3	8	0	0
HmN_000183800	1947		968	825	1498	1554	1254	1199	709	1013	783	1222	995	1155	2009	1981	2261	792	256	453
HmN_000183900	237		54	41	90	52	62	50	0	4	4	11	3	14	4	1	1	3	3	1
HmN_000184000	1911		147	118	271	300	207	180	25	38	19	92	66	99	45	18	42	29	13	38
HmN_000184100	630		955	734	1298	1418	1373	1212	333	653	345	614	767	1221	717	673	978	705	427	466
HmN_000184200	2115		942	856	1449	1547	1248	1100	756	1297	884	1212	860	1134	1903	1569	2143	1226	617	986
HmN_000184300	1296		0	3	2	0	6	7	7	6	2	0	0	3	4	12	9	7	3	5
HmN_000184400	2220		936	779	1330	1504	1263	1158	648	1081	717	1386	1022	1579	1188	869	1297	857	588	786
HmN_000184500	1035		6491	5459	9923	10198	8775	8017	2833	4578	2987	5543	3976	5039	4973	3997	5816	4301	2698	2837
HmN_000184600	1485		854	714	1406	1353	1255	1092	568	802	579	724	531	764	1525	1646	1847	606	332	435
HmN_000184700	1161		26	29	45	35	48	30	120	139	76	109	88	128	139	105	130	141	83	186
HmN_000184800	1809		207	190	299	291	263	250	237	345	239	243	198	228	275	264	417	527	230	430
HmN_000184900	960		0	1	2	2	3	0	260	374	335	3	14	7	1786	1263	824	331	112	10
HmN_000185000	417		886	834	1089	1193	1018	943	531	1299	1002	2914	1317	2007	1894	667	603	930	905	1656
HmN_000185100	684		37	27	51	46	9	22	20	3	0	2	0	0	0	0	0	41	16	28
HmN_000185200	5238		607	520	901	947	810	714	774	1341	871	1280	854	1192	950	753	1284	2420	1293	1888
HmN_000185300	5031		1018	963	1668	1817	1538	1414	436	669	451	1035	676	958	834	740	1075	554	240	459
HmN_000185400	1476		106	82	144	128	122	110	89	156	75	310	247	310	202	135	178	145	74	150
HmN_000185500	288		0	0	0	0	0	0	0	0	0	0	0	0	0	0	0	0	0	0
HmN_000185600	4509		1257	1082	2030	2285	1887	1597	209	341	180	548	484	594	321	268	478	258	134	177
HmN_000185700	978		3342	2752	4692	4527	3874	3546	8753	13895	8841	9791	7259	9722	11830	7991	12199	17815	10513	9522
HmN_000185800	3525		929	733	1507	1636	1366	1192	488	800	497	925	722	857	913	815	1278	735	379	570
HmN_000185900	1749		440	409	751	739	573	573	315	500	352	610	383	593	534	426	634	438	262	322
HmN_000186000	3636		314	357	590	544	459	447	135	224	156	633	432	567	196	159	289	225	107	231
HmN_000186100	1602		1317	1048	1812	1914	1710	1776	472	765	477	685	496	791	722	671	876	944	594	904
HmN_000186200	2664		336	302	526	496	503	376	103	171	140	289	157	242	269	235	320	97	55	72
HmN_000186300	5238		1114	988	1741	1707	1384	1314	619	902	522	1266	1055	1167	714	573	931	903	483	1064
HmN_000186400	3924		278	242	389	434	345	277	74	168	98	182	116	165	259	222	251	186	85	126
HmN_000186500	1368		2185	1900	3192	3399	3035	2737	745	1092	833	1549	1167	1697	1883	1505	2065	1185	693	878
HmN_000186600	2694		2	2	2	7	6	2	365	651	538	3	10	8	1164	882	1684	354	115	17
HmN_000186700	1176		4445	3857	6392	6682	6307	5706	1307	2011	1300	2290	1770	2439	2043	1911	2753	1985	1201	2071
HmN_000186800	1071		318	278	485	556	413	410	147	191	171	213	144	239	456	284	486	190	90	110
HmN_000186900	708		1298	1152	1992	2089	1891	1637	965	1642	1059	1671	1183	1957	1454	1309	2030	2301	1365	2379
HmN_000187000	414		204	260	382	400	311	246	77	121	105	93	59	108	301	169	259	86	57	50
HmN_000187100	636		2	0	0	0	1	2	0	1	0	0	0	0	0	0	0	0	0	0
HmN_000187200	516		0	0	0	0	0	0	1	1	0	0	0	0	0	0	0	0	0	0
HmN_000187300	1095		1764	1365	2417	2533	1982	1850	8150	9234	6543	2735	1815	2750	8150	5845	8781	15187	9307	19259
HmN_000187400	3942		539	442	849	897	712	652	955	1468	999	1366	920	1477	1238	987	1488	1992	1162	2064
HmN_000187500	1995		647	596	988	1037	826	759	127	225	221	1129	811	947	251	189	333	223	125	203
HmN_000187600	381		0	0	0	0	0	0	0	0	0	0	0	0	0	0	0	0	0	0
HmN_000187700	1986		108	72	136	171	157	129	1790	2517	1859	3096	2356	2770	2378	2077	3763	3799	2167	3848
HmN_000187800	2811		140	122	214	205	181	153	311	465	258	386	270	410	386	301	462	638	375	670
HmN_000187900	3741		694	600	1011	1045	1010	911	553	868	488	842	605	599	596	593	820	1345	681	1113
HmN_000188000	2382		171	128	249	310	194	180	49	84	63	88	50	127	112	61	72	43	34	47
HmN_000188100	1494		961	784	1514	1623	1308	1127	798	1156	929	2364	1783	2475	1409	1024	1717	1158	774	998
HmN_000188200	597		0	0	0	0	0	0	0	0	0	0	0	0	0	0	0	0	0	0
HmN_000188300	1494		754	538	1091	1015	896	755	464	724	501	1151	760	1102	799	639	872	624	367	556
HmN_000188400	1425		396	311	607	702	489	494	535	741	446	541	450	491	904	901	1109	702	371	694
HmN_000188500	429		2030	1689	2470	2703	1992	1877	195	262	219	464	210	247	1320	307	275	147	97	93
HmN_000188600	2409		669	556	1198	1128	975	840	182	239	207	541	329	595	330	244	402	316	173	431
HmN_000188800	1401		197	189	315	310	280	221	238	341	263	107	112	165	666	489	799	151	66	43
HmN_000188900	855		7505	6540	10229	10791	9249	8047	8616	13705	9395	12735	8689	12639	11908	8321	12760	17891	11475	12842
HmN_000189000	2172		1074	810	1673	1749	1482	1409	736	1212	844	1562	1084	1514	1431	1140	1833	1474	952	1473
HmN_000189100	642		4563	3797	6527	7016	6206	5611	2897	4167	2345	3055	2491	3402	4785	3647	5829	6687	3677	6841
HmN_000189200	795		812	649	1240	1277	1180	945	1504	2298	1617	1434	980	1620	4355	4133	4345	2370	1463	2004
HmN_000189300	2175		5	4	6	4	8	6	978	1260	1257	3	10	35	4706	4913	4089	828	110	22
HmN_000189400	273		5	8	10	15	12	11	6	17	4	3	3	3	25	1	8	13	8	8
HmN_000189500	483		770	659	1117	1222	1061	971	204	352	302	558	292	395	786	535	442	257	156	288
HmN_000189600	921		4	0	2	2	4	3	315	318	331	9	19	23	1485	1636	1211	239	29	11
HmN_000189700	714		119	76	183	161	129	125	3873	8931	6539	36215	9323	13572	23966	4396	3306	4809	5066	6257
HmN_000189800	2061		2076	1810	3056	3139	2648	2401	1819	2806	1683	2428	2057	2564	3228	2788	3691	2859	1424	2217
HmN_000190000	936		13	5	10	13	11	9	1	1	4	17	18	16	9	0	6	5	0	3
HmN_000190100	2091		26	33	29	35	40	22	61	116	85	58	59	61	149	98	155	117	43	70
HmN_000190200	366		1313	1144	2074	2138	1820	1654	438	831	544	948	599	963	1009	667	921	838	581	981
HmN_000190300	1374		370	341	604	579	471	438	138	180	177	181	110	207	327	390	507	183	126	149
HmN_000190400	207		5	8	9	11	9	11	0	0	0	0	0	0	0	0	0	0	0	0
HmN_000190500	1623		293	211	384	409	330	347	552	899	561	600	372	572	1203	842	1023	879	461	977
HmN_000190600	2064		231	224	384	463	368	355	184	341	147	310	183	285	322	224	344	507	250	313
HmN_000190700	1578		652	530	769	888	784	710	182	312	214	565	408	566	321	287	429	389	191	392
HmN_000190800	1989		8	21	40	20	14	40	17	18	6	9	17	9	11	50	25	10	6	5
HmN_000190900	6543		1284	1102	2128	2121	1783	1514	207	301	206	524	335	512	401	241	375	332	176	299
HmN_000191000	279		0	0	0	0	2	0	0	0	0	0	0	0	0	0	0	0	0	0
HmN_000191100	1362		318	256	490	529	418	423	425	652	427	262	188	265	474	285	540	1065	624	1354
HmN_000191200	957		1736	1431	2430	2523	2339	2014	2492	4056	2909	3770	2778	3663	5210	4109	5835	3844	2210	3963
HmN_000191300	4182		2825	2188	3686	4031	3274	3000	1922	3059	1859	3339	2135	2959	2891	2167	3579	3310	1877	3096
HmN_000191400	954		157	118	215	234	216	177	187	278	166	278	179	285	291	196	387	472	268	466
HmN_000191500	768		94	69	116	130	81	99	3	19	10	10	3	13	35	47	50	17	9	4
HmN_000191600	2550		1676	1414	2551	2768	2243	2028	1344	2106	1278	2136	1384	1975	2141	1977	2985	2243	1466	1893
HmN_000191700	1941		899	738	1549	1617	1387	1178	404	613	367	600	472	567	525	424	614	938	586	895
HmN_000191800	669		1	0	0	0	0	0	212	410	223	4	5	0	539	476	653	231	138	25
HmN_000192000	270		0	0	0	0	0	0	0	0	0	0	2	0	0	0	0	0	0	0
HmN_000192100	972		46	37	73	66	73	36	36	58	48	87	53	87	86	49	131	54	36	46
HmN_000192200	2322		261	239	438	419	323	338	246	442	253	210	178	225	717	779	728	237	117	189
HmN_000192300	2049		4995	4046	7443	7754	6461	5720	6981	9970	7115	14956	10398	14919	12275	10373	16303	8234	5419	6455
HmN_000192400	555		316	318	397	470	409	365	548	1055	541	502	243	515	1053	469	379	455	297	946
HmN_000192500	261		0	0	0	0	0	0	0	0	0	0	0	0	0	0	0	0	0	0
HmN_000192600	336		3	6	11	8	6	9	0	1	0	4	0	2	0	1	0	0	0	0
HmN_000192700	1956		360	309	604	558	550	450	82	127	116	446	310	410	212	150	282	115	52	93
HmN_000192800	603		369	331	543	638	624	587	221	332	270	501	542	975	490	430	486	233	150	231
HmN_000192900	1257		278	204	359	456	384	277	97	128	134	166	190	247	294	180	327	110	54	83
HmN_000193000	630		988	822	1218	1343	1337	1209	70	113	109	1592	592	953	189	6	40	18	7	1
HmN_000193100	14436		142	126	197	197	181	151	3929	5832	1892	525	298	479	4084	1859	2400	4528	2066	6682
HmN_000193200	16359		432	401	587	642	578	619	6127	9495	6063	6322	5194	5797	7034	6515	10803	11971	7280	12044
HmN_000193300	1248		1892	1667	3074	3125	2569	2346	3211	4360	2858	2171	1790	2203	3452	3061	4733	8291	4973	8713
HmN_000193400	339		0	0	1	0	1	0	9	8	6	1	0	0	2	18	14	7	1	2
HmN_000193500	1224		467	371	653	689	622	509	183	279	156	377	315	464	335	213	460	232	136	186
HmN_000193600	963		386	359	496	574	560	441	72	97	80	234	138	259	183	127	167	89	28	79
HmN_000193700	1641		771	731	1208	1300	1213	1049	316	400	282	561	415	644	432	408	638	480	326	531
HmN_000193800	603		154	159	228	242	243	216	96	119	117	22	26	41	399	334	393	132	26	48
HmN_000193900	813		1	0	1	1	2	0	9	5	1	4	3	3	7	4	8	5	0	3
HmN_000194000	1800		660	628	871	907	869	733	222	471	329	595	487	584	612	428	634	347	183	208
HmN_000194100	375		464	402	732	749	747	732	355	649	469	873	551	1200	957	770	782	535	381	661
HmN_000194200	441		4782	3935	5508	5876	4891	4258	565	1198	882	1734	626	1016	4488	505	645	609	527	709
HmN_000194300	2724		773	682	1272	1429	1084	960	397	687	433	1013	595	875	682	517	809	736	360	710
HmN_000194400	1107		1422	1202	2033	2046	1690	1594	701	993	680	1001	630	781	1423	1073	1464	1004	584	757
HmN_000194500	3978		1217	1041	1780	1908	1496	1376	2579	3696	2542	1551	1105	1357	3889	3203	5239	5930	3344	5282
HmN_000194600	2988		1748	1557	2688	2868	2367	2147	1175	2144	1263	1704	1252	1888	2701	2043	2951	1749	948	1173
HmN_000194700	996		404	374	635	671	586	564	218	302	175	408	218	353	421	274	390	217	164	212
HmN_000194800	1533		113	79	164	190	129	151	357	487	486	57	57	48	1729	1392	1452	398	150	46
HmN_000194900	909		1	0	2	1	0	0	0	2	1	0	2	0	2	1	5	1	0	0
HmN_000195000	348		85	64	65	112	104	57	1154	3679	2128	1914	350	880	4389	1199	750	2944	2599	5052
HmN_000195100	327		0	0	0	0	0	0	0	0	0	0	0	0	0	0	0	0	0	0
HmN_000195200	318		14	7	18	12	20	14	29	29	31	65	23	45	52	16	25	28	20	29
HmN_000195300	1764		475	410	731	855	681	644	478	860	613	715	479	631	956	786	1084	947	629	984
HmN_000195400	1326		1289	1082	1990	2008	1651	1506	525	902	578	1246	705	1121	1097	754	995	899	550	947
HmN_000195500	1698		943	678	1260	1305	1145	978	440	770	489	755	489	869	1001	715	950	738	377	507
HmN_000195600	3216		6352	5449	9488	9655	8344	7664	3281	4727	3226	5505	3812	5140	6066	5043	7278	4466	2377	3744
HmN_000195700	2196		3238	2860	4854	5153	4290	3837	2325	3613	2222	4073	2898	3760	3715	3376	5141	3083	1804	3007
HmN_000195800	3363		411	386	638	696	540	482	288	404	287	345	184	268	326	298	460	590	389	622
HmN_000195900	1842		230	163	279	262	226	197	115	196	107	118	92	91	179	106	157	394	192	356
HmN_000196000	4800		1078	929	1888	1886	1622	1469	1018	1502	1112	1390	991	1434	2739	2259	3166	1048	438	458
HmN_000196100	2085		334	302	576	529	483	431	951	1842	1095	1602	963	1339	1637	1347	1941	2154	1150	2111
HmN_000196200	3981		1233	1017	1814	1948	1670	1558	1079	2039	1078	1458	1012	1400	1737	1397	2111	2117	1238	1800
HmN_000196300	2001		199	202	305	310	261	230	69	135	64	244	171	234	100	89	168	94	49	101
HmN_000196400	972		3605	3103	5262	5640	5142	4517	2963	4296	2962	6404	4489	6365	5998	3955	6177	3296	1892	2851
HmN_000196500	1827		283	253	402	414	429	361	300	535	415	717	481	752	670	585	758	645	359	715
HmN_000196600	252		1	1	3	2	3	3	0	4	3	0	0	0	3	17	6	0	1	0
HmN_000196700	2226		2340	2121	3743	3885	3284	3015	1953	3192	1896	3546	2350	3267	3737	3164	4582	2985	1592	2736
HmN_000196800	2934		65	64	139	120	113	87	78	176	76	114	81	95	82	148	183	179	100	164
HmN_000196900	576		807	651	1216	1114	1109	1074	269	363	254	548	393	631	452	337	328	326	270	402
HmN_000197000	3027		1278	1050	1897	1920	1877	1680	774	1318	898	1075	860	1147	1226	1085	1782	1794	1155	1673
HmN_000197100	5106		482	449	716	738	526	509	432	714	438	719	420	624	666	580	832	870	524	813
HmN_000197200	468		198	107	278	217	233	193	62	89	92	223	237	334	145	107	163	109	102	123
HmN_000197300	3306		608	593	1053	1010	874	757	535	868	552	778	589	765	1215	1159	1472	640	279	461
HmN_000197400	2271		1066	824	1514	1640	1253	1149	138	210	141	748	533	599	205	174	257	241	108	247
HmN_000197500	1335		0	0	0	0	2	0	182	213	192	0	3	2	811	793	527	114	9	2
HmN_000197600	204		0	0	0	0	0	0	0	0	0	0	0	0	0	0	0	0	0	0
HmN_000197700	261		3	2	3	2	10	8	1	2	0	6	1	2	0	1	2	0	0	0
HmN_000197800	1515		85	100	124	132	92	110	23	39	21	119	64	112	51	51	52	35	17	24
HmN_000197900	9303		464	414	738	814	756	711	227	341	178	322	263	298	297	294	501	363	151	274
HmN_000198000	984		1	1	5	3	5	4	190	386	365	3	13	10	969	608	1090	189	98	20
HmN_000198100	2115		1839	1519	2809	3068	2347	2249	1517	2453	1581	2612	1795	2422	3103	2798	4087	2356	1154	2353
HmN_000198200	1065		135	125	266	246	245	190	131	205	118	206	134	260	362	247	266	179	122	137
HmN_000198300	1596		570	499	967	997	866	839	401	651	408	776	568	678	672	586	850	679	328	611
HmN_000198400	1869		542	419	868	931	723	712	460	652	415	477	285	381	1082	1108	1180	835	365	497
HmN_000198500	981		2	2	2	5	2	0	322	388	421	0	8	9	1814	1700	1125	287	59	8
HmN_000198600	477		0	1	5	1	3	2	82	98	81	1	0	0	396	304	237	73	24	0
HmN_000198700	261		0	0	0	0	0	0	0	0	0	0	0	0	0	0	0	0	0	0
HmN_000198800	1215		3478	3158	5339	5524	5106	4448	1981	3311	2253	3336	2354	3509	3447	2896	4141	3047	1854	3130
HmN_000198900	8709		550	458	805	845	670	671	537	828	489	801	553	736	809	711	1091	1003	623	940
HmN_000199000	108		0	0	0	0	0	0	0	0	0	0	0	0	0	0	0	0	0	0
HmN_000199100	1200		34	28	39	61	44	41	64	77	63	0	8	6	157	138	158	33	21	26
HmN_000199300	381		20	6	33	29	26	27	7	11	3	6	4	8	12	13	19	9	9	4
HmN_000199500	7230		500	445	880	845	735	661	323	528	384	1069	701	873	1017	595	673	381	161	326
HmN_000199600	489		9675	8316	13176	13861	13625	12003	1078	2690	2092	3946	1565	3052	6790	1206	1081	1218	856	969
HmN_000199800	1194		808	677	1158	1218	1094	912	461	665	502	1212	906	1398	892	727	1116	497	318	460
HmN_000199900	2157		2026	1699	3488	3511	3133	2870	1532	2571	1616	2287	1628	1941	2694	2012	3181	2760	1526	2205
HmN_000200000	597		826	665	1122	1226	1095	1052	267	369	203	478	463	691	513	475	535	342	201	324
HmN_000200100	273		0	0	0	0	0	0	0	0	0	0	0	0	0	0	0	0	0	0
HmN_000200300	2037		1684	1264	2527	2537	2219	1847	835	1305	852	1235	792	1266	1362	993	1497	1772	1077	1377
HmN_000200400	1569		173	183	366	309	272	260	3961	7216	3248	2117	1538	2576	5389	3746	5298	6284	3900	6033
HmN_000200500	1182		1050	911	1634	1580	1437	1238	630	909	594	1153	692	1202	1021	851	1326	763	422	713
HmN_000200600	468		1027	865	1472	1583	1520	1247	293	534	418	884	346	622	2022	360	434	461	312	558
HmN_000200700	1698		653	590	1081	1057	912	791	315	426	264	454	339	446	559	482	541	390	259	255
HmN_000200800	1374		0	0	0	0	0	1	336	621	465	0	5	9	1079	795	1449	340	128	44
HmN_000201000	1191		403	347	634	667	610	582	664	1057	758	1394	902	1353	1030	872	1356	1380	801	1417
HmN_000201200	846		372	298	526	485	504	420	91	177	69	424	350	419	173	99	148	139	105	203
HmN_000201300	6006		10	9	9	18	15	22	262	405	98	13	9	34	152	95	108	590	311	620
HmN_000201400	309		2	0	0	0	0	0	1	0	1	0	0	0	0	0	0	0	0	0
HmN_000201500	276		0	0	2	0	2	1	1	0	1	0	0	0	0	0	0	0	0	0
HmN_000201600	3111		1129	952	1849	1921	1521	1424	835	1126	918	760	612	776	2564	2473	3022	911	253	244
HmN_000201700	720		420	388	685	653	631	611	147	236	185	307	264	402	243	184	304	121	100	103
HmN_000201800	2025		510	414	805	825	610	613	460	595	476	761	511	783	658	647	958	628	380	658
HmN_000201900	7116		705	540	1033	1110	908	731	1668	2599	1769	1425	779	1174	4189	4002	4602	2923	1306	1887
HmN_000202000	1056		2818	2399	4332	4765	4213	3792	2852	4021	2327	2218	1688	2397	4907	4485	4749	5605	3700	7107
HmN_000202100	1497		3597	3129	5617	5727	5019	4643	1445	2450	1533	2789	2095	2793	2940	2361	3182	2144	1036	1531
HmN_000202200	3051		845	796	1393	1440	1232	1076	741	1062	688	1117	730	1049	924	776	1262	1206	763	1226
HmN_000202300	234		2	15	13	22	8	10	3	7	5	9	12	11	6	8	25	12	5	11
HmN_000202400	1419		11	12	16	19	15	12	106	117	124	0	1	8	267	237	503	75	32	6
HmN_000202500	1704		694	617	1067	1140	775	770	158	262	134	431	306	394	255	169	250	156	82	143
HmN_000202600	2622		1665	1404	2489	2634	2140	1903	756	1226	807	1162	841	1044	1158	970	1598	1329	696	1230
HmN_000202700	1611		198	154	285	344	264	207	33	66	38	220	128	184	55	29	67	50	28	38
HmN_000202800	507		3553	3063	4948	5231	4408	4003	653	853	621	1024	1000	1344	1038	1191	1633	797	417	518
HmN_000202900	2643		204	184	315	371	304	274	664	873	862	256	198	272	2043	1294	2663	458	195	72
HmN_000203000	1389		429	294	646	764	656	524	240	329	250	580	416	640	422	257	418	270	157	208
HmN_000203100	1203		6705	5535	9840	10062	8715	7879	2529	4127	2441	4871	3522	4569	4962	3445	5418	3777	2113	3349
HmN_000203200	771		42	29	65	48	67	42	59	105	85	125	110	96	117	156	121	113	63	124
HmN_000203300	3249		180	117	227	276	191	179	427	584	518	130	116	161	1366	1594	1760	345	86	61
HmN_000203400	573		15959	13844	19891	20670	17588	15818	3011	5745	4533	11239	5737	8645	11417	3743	3333	3550	2704	4196
HmN_000203500	693		371	341	542	563	542	492	234	356	266	221	165	238	792	762	840	173	57	59
HmN_000203600	1134		9	9	16	10	11	6	3	0	1	6	4	3	3	1	6	4	1	5
HmN_000203700	1026		145	150	187	220	194	195	54	91	55	78	75	90	89	54	114	62	50	105
HmN_000203850	1308		0	0	0	0	0	0	0	0	0	0	0	0	0	0	0	0	0	0
HmN_000203900	213		0	0	0	0	0	0	0	0	0	0	0	0	0	0	0	0	0	0
HmN_000204000	1446		236	189	353	405	280	295	109	169	96	699	481	648	171	130	157	153	64	147
HmN_000204100	252		11	6	11	15	11	13	6	7	5	14	15	26	9	3	12	8	3	7
HmN_000204200	435		33	42	53	62	51	41	124	205	221	28	27	56	491	335	402	92	55	23
HmN_000204300	663		1566	1369	2274	2427	2489	2256	414	593	513	1009	765	1186	961	915	1281	516	241	321
HmN_000204400	987		187	158	253	286	256	222	237	362	326	264	168	236	778	462	904	234	123	72
HmN_000204500	3021		1531	1491	2376	2650	2162	2110	231	415	275	923	767	842	419	386	557	355	219	322
HmN_000204600	258		0	0	0	0	0	0	0	0	0	0	0	0	0	0	0	0	0	0
HmN_000204700	216		24	9	26	23	26	19	5	21	7	6	8	10	19	17	19	20	10	30
HmN_000204800	567		395	317	562	600	600	425	480	703	546	1352	998	1382	822	637	914	927	576	959
HmN_000204900	2118		2530	2211	3775	3820	3497	3015	559	1167	686	1022	662	931	765	661	967	1519	905	1204
HmN_000205000	579		20354	17316	26527	28066	26760	24579	5913	9818	7755	12738	9784	16426	10827	8328	7491	7795	4928	7228
HmN_000205100	486		286	260	345	474	402	361	214	345	340	367	333	520	680	407	388	329	247	284
HmN_000205200	2256		947	841	1434	1545	1254	1134	278	502	340	706	497	571	454	351	550	664	331	564
HmN_000205300	468		0	0	0	0	1	0	0	0	0	0	0	0	1	0	0	0	1	0
HmN_000205400	252		60	56	81	78	65	51	3	3	2	5	4	13	4	1	3	2	0	2
HmN_000205500	1671		87	89	91	128	98	75	49	72	35	606	1222	1035	34	48	179	29	29	42
HmN_000205600	1656		217	187	335	289	256	273	73	151	80	101	111	132	165	163	249	70	43	31
HmN_000205700	948		1125	998	1598	1569	1422	1298	350	462	337	629	541	735	649	636	873	484	208	383
HmN_000205800	1869		857	766	1484	1517	1284	1157	461	741	506	922	679	981	802	794	1102	688	379	557
HmN_000205900	552		581	472	753	736	695	614	344	433	277	458	415	697	397	349	431	542	288	682
HmN_000206000	2124		41	23	44	54	52	17	644	826	567	36	16	43	303	210	245	2099	1284	2409
HmN_000206200	711		11	6	24	15	10	8	2	3	1	5	1	3	0	0	1	2	3	0
HmN_000206300	1017		15	17	30	38	16	25	3	8	4	14	5	9	1	5	4	5	4	5
HmN_000206400	1491		461	307	699	677	582	558	223	345	227	539	328	499	399	325	582	329	181	270
HmN_000206500	1692		1184	925	1654	1687	1565	1411	261	486	237	907	558	912	443	447	650	359	151	278
HmN_000206600	279		2	2	6	6	6	3	3	0	2	0	0	1	5	3	9	4	2	6
HmN_000206700	792		2013	1692	2790	2985	2626	2387	341	403	302	596	459	718	590	507	786	402	191	319
HmN_000206800	519		0	0	0	0	0	0	0	0	0	0	0	0	0	0	0	0	0	0
HmN_000206900	462		0	0	2	1	2	0	0	1	1	0	0	0	0	0	0	0	0	0
HmN_000207000	1164		0	0	0	0	2	1	1	0	0	0	0	0	0	0	0	0	0	1
HmN_000207100	243		0	0	0	0	0	1	23	39	24	0	1	0	119	79	71	30	6	1
HmN_000207200	897		4	0	0	2	1	1	74	117	58	0	1	0	389	239	219	80	22	2
HmN_000207300	372		0	0	0	0	0	0	0	0	0	0	0	0	0	0	0	0	0	0
HmN_000207400	474		100	76	166	155	160	133	144	198	105	136	116	164	111	133	222	250	145	249
HmN_000207500	411		10	14	40	31	8	14	1	0	3	6	1	11	7	2	5	5	1	2
HmN_000207600	774		66	28	69	74	49	67	203	413	211	323	168	246	231	174	385	348	221	463
HmN_000207700	702		192	185	277	328	299	212	313	592	331	111	79	108	510	460	592	504	255	515
HmN_000207850	597		354	336	509	586	566	550	164	280	169	333	365	533	348	359	350	257	171	212
HmN_000207900	2007		1364	1226	2149	2180	1789	1693	530	884	558	1037	732	1023	848	585	1041	1134	600	1005
HmN_000208000	333		2	0	1	0	3	4	0	1	0	0	0	0	0	0	0	0	0	0
HmN_000208100	861		2490	2113	3582	3591	3258	3102	883	1297	928	1855	1307	1760	1683	1373	1722	1097	606	1023
HmN_000208200	762		516	442	754	714	633	586	146	262	187	353	303	405	299	152	240	230	167	319
HmN_000208300	1584		891	854	1371	1513	1221	1137	128	196	105	357	285	415	264	178	329	181	99	131
HmN_000208400	600		741	747	1276	1232	1105	988	187	275	195	485	323	542	344	281	471	302	185	257
HmN_000208500	450		254	221	371	420	344	313	81	189	120	193	98	187	454	137	121	126	65	77
HmN_000208600	132		41	49	52	43	65	58	37	61	57	16	8	11	196	40	34	29	8	7
HmN_000208700	1527		2	3	11	15	11	16	481	867	696	689	423	662	949	673	967	1201	729	1074
HmN_000208800	969		40	35	83	68	48	61	106	152	111	294	184	273	207	173	263	152	102	143
HmN_000208900	771		13	12	12	20	21	15	0	7	2	15	9	21	5	2	0	9	2	6
HmN_000209000	1122		26	22	63	44	26	45	37	72	25	70	73	78	58	22	52	58	37	84
HmN_000209100	447		0	0	0	0	0	0	0	0	0	0	0	0	0	0	0	0	0	0
HmN_000209200	600		0	0	0	1	0	0	0	0	0	0	2	0	0	0	0	0	0	1
HmN_000209400	237		29	25	40	19	38	32	2	0	1	2	1	1	0	5	1	0	0	0
HmN_000209500	354		491	369	599	608	549	538	11	32	17	52	20	43	104	10	31	8	8	9
HmN_000209600	1533		797	696	1204	1175	1024	979	302	459	330	555	380	633	788	581	783	385	181	281
HmN_000209700	312		508	464	488	560	457	420	15	38	22	48	31	38	68	12	24	6	8	10
HmN_000209800	1083		168	124	193	205	214	188	54	108	52	117	110	139	134	97	191	69	49	52
HmN_000209900	762		11385	9710	16416	17089	14637	13167	2718	3896	2753	5467	3845	5713	4677	3563	5004	3966	2548	4126
HmN_000210000	1605		4	4	15	19	13	12	12	19	10	6	6	6	45	56	25	6	2	8
HmN_000210100	205		0	0	0	0	0	0	0	0	0	0	0	0	0	0	0	0	0	0
HmN_000210200	1154		0	0	0	4	1	4	629	781	798	2	23	25	3273	2811	2317	642	181	19
HmN_000210300	1017		691	632	1027	1071	926	860	406	683	413	612	467	668	721	583	893	687	409	681
HmN_000210400	318		2470	2112	3285	3304	3802	3258	335	569	372	691	501	782	820	553	818	550	362	592
HmN_000210500	276		1487	1192	1847	1859	1781	1483	452	730	451	731	698	1037	698	740	1321	826	432	729
HmN_000210600	1287		294	223	412	400	419	344	510	818	541	621	384	529	712	515	859	1128	594	1127
HmN_000210700	774		514	392	700	738	659	553	129	192	132	342	264	434	281	177	218	147	80	151
HmN_000210800	741		3	1	0	0	2	0	4	8	7	0	2	0	5	6	15	2	0	0
HmN_000210900	1200		146	116	245	201	200	182	168	297	132	423	380	415	196	152	210	258	107	292
HmN_000211100	201		3	0	1	1	0	0	0	3	0	0	0	0	2	2	1	2	0	1
HmN_000211200	2622		0	0	0	0	4	2	264	306	287	2	4	8	753	513	1035	192	85	26
HmN_000211300	4983		1582	1338	2405	2588	2136	1789	1235	1978	1182	1107	865	1047	2701	3079	3319	1785	806	1488
HmN_000211400	522		0	0	1	3	3	1	286	424	379	5	5	8	1543	1334	1250	249	56	20
HmN_000211500	1914		313	255	459	501	410	307	117	177	113	261	132	239	203	156	188	218	93	173
HmN_000211600	579		18168	15715	29005	30610	27209	24835	5715	9623	6027	11273	9176	15301	8598	7587	8143	7412	5335	8556
HmN_000211700	2091		536	463	842	833	669	633	690	1096	619	667	508	714	1004	1026	1292	1321	773	1365
HmN_000211800	456		0	4	4	3	2	2	1	3	0	2	0	2	5	1	0	1	0	0
HmN_000211900	3141		668	536	1014	994	871	814	286	515	346	653	429	550	550	602	814	411	211	327
HmN_000212000	747		5748	4724	8130	8622	7742	6666	916	1377	1045	1876	1338	2092	1956	1481	2227	1450	825	1254
HmN_000212100	1779		245	213	357	406	298	293	118	234	130	384	241	356	277	147	248	232	162	239
[truncated: 10,374 more rows]

## Sheet: S1.3 Normalised read counts
Additional file 1. Table S1.3. Normalised (FPKM) mapped read counts by gene model and sample replicate.
Gene Model	Length (bp)		LV 1.1	LV 1.2	LV 2.1	LV 2.2	LV 3.1	LV 3.2	WA 1	WA 2	WA 3	Scolex-Neck 1	Scolex-Neck 2	Scolex-Neck 3	Mid 1	Mid 2	Mid 3	End 1	End 2	End 3
			9887_3#13	9887_4#13	9887_5#12	9887_6#12	9887_7#12	9887_8#12	7893_5#10	7893_5#11	7893_5#12	7893_5#1	7893_5#2	7893_5#3	7893_5#4	7893_5#5	7893_5#6	7893_5#7	7893_5#8	7893_5#9
HmN_000000100	2961		50.6734	51.9688	53.9029	54.438	54.7706	52.6531	51.6642	51.9272	50.1508	55.1545	56.7507	52.2787	49.0082	61.0394	64.1188	39.1718	35.1303	31.0522
HmN_000000200	657		36.7676	35.8192	31.2023	34.1705	35.0566	36.3465	122.466	120.585	89.8927	40.6322	41.679	49.2912	131.132	144.136	97.2104	121.617	102.408	86.7562
HmN_000000300	1920		149.954	149.106	159.046	149.199	157.889	156.584	88.716	80.6087	87.0556	107.237	113.47	108.478	80.3831	81.8176	91.6849	75.1325	67.9845	74.5092
HmN_000000400	960		63.8276	69.1383	56.9905	65.3455	63.6736	61.7229	34.1687	33.1636	29.7299	47.4366	40.3511	39.5166	32.925	34.8605	32.8095	28.0125	29.4149	25.2095
HmN_000000500	363		0	0.944123	0.183356	0.353404	3.82712	2.00698	2.83652	2.28136	1.16769	0.508933	0	0	0.868573	1.45415	0.801561	3.78697	3.96896	0.772237
HmN_000000600	297		0	0.384643	0	0.215969	1.72332	2.18042	2.97159	2.1687	0.951452	0.311015	0	0	0.796192	1.77729	0	2.60354	4.85095	1.25846
HmN_000000700	1626		4.46896	4.1452	5.19858	4.77324	4.67668	3.58442	46.7697	38.9336	19.812	5.34004	4.43611	4.60926	10.1316	13.8294	10.4236	92.7331	106.15	90.7972
HmN_000000800	735		164.863	173.767	167.256	158.481	174.886	187.998	92.8592	84.6285	89.388	102.174	128.669	156.729	82.1475	109.88	117.178	72.0065	63.9018	77.5494
HmN_000000900	1161		60.5587	60.0221	63.3478	61.3252	59.7666	59.4037	46.3707	47.6321	36.996	56.3298	62.5887	61.4454	34.2177	43.1014	42.5423	45.5115	44.6738	49.3361
HmN_000001000	2289		29.9866	28.2977	28.4959	32.1695	32.4863	31.0142	13.3021	16.8834	15.8018	28.7727	24.5094	25.1023	17.0456	16.4191	17.5737	12.1988	8.68593	12.2057
HmN_000001100	1023		58.5531	55.0535	60.2472	63.2024	63.612	61.0078	38.5348	40.3857	43.644	61.2197	55.1018	56.9812	53.6274	58.1002	54.2541	35.1058	34.6452	38.9108
HmN_000001200	2007		0	0	0	0	0.072863	0	9.30788	9.62784	12.6014	0.276148	0	0.046102	16.4166	14.8336	18.412	3.21064	2.36892	0.372459
HmN_000001300	162		163.661	165.717	167.628	195.2	161.582	205.868	148.002	210.725	177.922	197.857	201.189	217.609	187.326	188.985	158.505	125.693	118.282	109.591
HmN_000001400	345		0	0	0	0	0	0	0	0.533418	0	0	0	0	0	0.306003	0	0	0	0
HmN_000001500	492		0	0.232193	0.135281	0	1.18891	1.48076	1.49486	0.561065	0.287176	0	0	0.376125	0.480628	1.28745	0.295698	2.27016	0.878495	0.37984
HmN_000001600	312		8.18303	12.8153	11.733	13.3631	33.0437	29.0583	8.01473	12.6815	7.24567	0.592124	0.428129	5.33808	16.4215	3.38369	2.09832	9.91348	12.0061	7.48724
HmN_000001700	1668		409.858	405.11	428.518	431.888	420.429	410.467	904.786	810.093	900.601	507.267	533.504	526.259	757.656	758.492	890.824	959.611	999.356	1067.73
HmN_000001800	1488		80.3785	79.6141	88.8785	89.8776	80.7345	81.7097	39.6402	44.1522	40.3552	68.9682	67.7755	68.3379	47.3044	51.8632	51.9653	23.7311	17.7187	23.9881
HmN_000001900	891		745.675	728.898	735.875	747.542	708.367	708.636	522.34	553.224	480.483	576.932	639.247	553.914	651.727	569.8	513.437	311.171	273.432	223.272
HmN_000002000	1218		67.4798	61.5277	64.427	61.6677	63.2729	59.0828	63.7648	60.8898	59.7411	101.245	90.5861	94.3499	66.2683	71.7675	66.4709	65.2488	62.3371	68.8914
HmN_000002100	741		74.7406	66.755	68.8936	69.5097	63.9413	66.9651	38.3119	44.0826	47.8596	29.7932	33.1687	32.0909	71.4832	64.3969	51.2431	30.0303	31.4978	22.0676
HmN_000002200	1707		36.1261	35.4027	38.4455	35.4721	34.9527	34.8072	26.4545	25.6046	27.9767	29.3835	31.1443	23.3078	27.8443	23.9962	28.7643	28.4879	25.3204	23.1002
HmN_000002300	2112		2.74318	3.56996	3.309	4.22152	4.11981	3.71779	5.91997	6.7094	8.62997	5.99189	5.62892	4.46862	11.0472	10.797	12.6747	3.29511	1.43255	0.353942
HmN_000002400	3099		17.9029	19.7955	22.4868	21.0084	21.0223	20.3219	9.87271	8.99659	8.52577	11.3266	14.0947	10.3006	6.84201	6.43851	7.4643	11.0342	9.80943	12.905
HmN_000002500	1053		2.79762	3.9056	3.8557	3.71578	2.77751	2.84433	53.7807	53.6534	68.163	102.196	87.4017	99.9077	60.8577	49.0259	45.3168	68.7008	75.936	88.6489
HmN_000002600	1575		107.299	110.612	103.873	104.502	98.0943	97.0863	215.364	161.946	197.089	158.351	160.885	142.285	134.074	138.55	145.761	274.879	299.855	402.359
HmN_000002700	3759		6.34789	6.10854	6.56906	7.38863	7.11924	6.74029	6.53489	3.79417	5.37498	16.3659	15.8486	14.7688	4.59224	3.70721	5.53448	6.01121	3.94773	5.64274
HmN_000002800	882		130.038	139.496	129.947	131.486	139.107	136.107	41.1929	53.4144	51.7425	84.5167	88.1421	95.6738	43.3437	57.9324	57.9789	29.9053	29.566	31.041
HmN_000002900	717		3924.98	3907.54	3792.8	3860.56	4077.17	4059.48	985.754	966.86	1035.34	1542.36	1537.52	1592.44	1159.15	887.563	956.295	709.623	688.216	773.199
HmN_000003100	534		0	0	0.249282	0	0	0.151588	0.550913	0	0	0	0.750428	1.03963	0.295217	0.197699	0.272441	0.160893	0	0.174983
HmN_000003200	621		393.734	393.305	390.561	382.378	405.623	414.386	182.624	204.477	217.51	347.174	350.826	404.227	201.31	204.682	212.954	132.957	158.921	153.778
HmN_000003300	5004		25.2163	23.1948	23.1171	23.5857	22.3855	21.887	120.403	114.559	116.556	80.1697	80.6422	69.2101	106.594	109.39	128.606	122.419	111.02	117.679
HmN_000003400	666		4.71814	7.54731	8.19486	7.80116	7.13615	7.29262	14.356	15.1976	22.912	14.0083	16.8474	15.699	31.8369	18.5463	23.3735	13.8035	13.1959	14.5913
HmN_000003500	1704		19.5932	18.3024	18.7488	19.9882	17.5071	15.9616	15.4518	18.3597	16.2517	14.4737	11.5233	12.8147	16.6065	16.7278	17.8439	19.2607	17.4173	18.5894
HmN_000003600	6693		32.6734	31.6448	29.7041	30.9166	31.7795	31.8084	16.8566	16.3325	10.9562	16.3406	16.6446	14.6815	9.23312	8.31256	9.79236	19.5505	17.3069	16.809
HmN_000003700	2313		21.4393	23.8059	20.0567	21.5751	20.516	20.6132	76.3769	78.2503	90.773	92.4113	92.7468	88.1664	69.7923	69.8787	83.1513	90.7457	92.8721	92.6732
HmN_000003800	321		0	0	0.414693	0.399644	0.455564	0	0	0	0	0	0	0	0	0	0	0	0	0
HmN_000003900	639		6.45422	11.263	7.2912	8.43193	11.4426	5.95393	4.83407	5.18393	2.87446	4.48124	7.73446	4.77837	0	0.330426	1.70755	4.97484	7.4404	10.2361
HmN_000004000	684		13.2077	10.522	14.3042	11.2531	15.1795	14.2014	67.9556	103.853	40.0737	147.74	103.502	132.162	67.7601	51.7051	53.0674	75.1144	89.5191	130.325
HmN_000004100	873		24.1835	31.1442	28.0566	25.3486	27.6391	26.3336	278.518	357.202	168.157	413.714	258.737	416.211	163.695	166.64	195.228	251.157	306.3	480.155
HmN_000004200	627		0.626452	0.364398	1.06153	0.409205	0.233231	0.258208	0	0.293508	0.676032	1.03126	2.55648	3.39412	0.377144	1.347	0.928124	1.09623	0.689345	1.34125
HmN_000004300	528		164.033	157.511	166.774	140.677	175.594	188.266	133.164	209.473	215.95	197.514	92.3396	125.822	324.399	92.7746	45.188	105.443	162.082	148.833
HmN_000004400	3288		5.49517	6.2887	4.65584	5.52081	4.53652	5.19466	0.760522	0.643655	0.859432	3.48359	2.43752	2.75779	0.81508	0.674268	0.663702	0.601	0.525814	0.767305
HmN_000004500	4491		13.775	14.0159	15.1316	16.3535	15.1902	15.1947	26.4317	24.2176	21.8024	23.3242	25.1626	24.5584	19.3416	26.8923	28.5395	26.4198	26.6267	28.7126
HmN_000004600	891		52.3494	58.3375	59.4617	59.6075	60.0701	57.3269	32.6875	33.7697	33.1423	43.4384	38.0789	45.796	35.6517	42.5365	37.3914	25.3604	26.0334	26.6374
HmN_000004750	3069		29.7565	29.2577	32.3357	31.2877	31.1151	34.7372	16.9189	19.7281	21.9141	21.9717	18.8896	20.7725	24.0142	19.9859	15.1693	15.8452	15.9142	17.3546
HmN_000004800	2256		4.61384	5.21569	4.21889	5.20308	4.9588	4.80809	9.71497	8.72834	5.19819	0.286613	0.177628	0.779258	4.78668	5.98985	7.02912	7.73099	6.76939	9.69199
HmN_000005000	2115		0.0464285	0	0.0629392	0	0.414854	0.22964	38.3209	34.9351	43.8235	6.02707	8.02089	6.38718	53.4059	54.1083	64.5905	17.3459	16.8937	7.59896
HmN_000005100	1284		98.1199	93.8645	89.159	93.8164	92.9351	94.6285	70.3393	63.7796	65.2534	90.6448	80.4162	91.2296	65.6859	66.1875	70.8722	75.3445	70.9145	84.8535
HmN_000005200	900		29.568	27.2904	28.5461	27.7952	29.8159	27.8821	28.9285	32.8186	37.3635	50.1885	41.557	52.5346	35.2076	41.1727	37.5024	21.3837	16.1682	11.1091
HmN_000005300	2775		12.5621	12.4325	12.664	12.713	11.6198	12.3975	6.36081	7.52697	12.3216	14.9126	17.762	14.5709	6.44787	6.35329	7.15621	7.77122	6.38595	9.42825
HmN_000005500	1944		45.7138	42.7808	44.6803	43.7188	40.9597	39.5996	54.3279	45.25	49.9314	65.2397	61.566	64.0167	38.7628	44.531	48.3448	56.3056	57.5848	74.07
HmN_000005600	606		3.72692	6.03242	4.83261	5.7157	4.22299	3.6066	2.91275	4.2515	5.59567	6.40198	10.1394	9.00837	1.95106	2.61315	3.72111	2.83554	3.32842	3.08385
HmN_000005700	4668		0.441757	0.318146	0.556078	0.316042	0.360265	0.450868	0.252089	0.256253	0.332947	2.25586	1.6883	1.78393	0.118201	0.0678478	0.0779153	0.147244	0.061728	0.280242
HmN_000005800	1263		45.7939	44.5016	43.3182	44.7934	47.6454	49.9917	10.8311	14.0608	13.8718	19.6737	16.4987	22.7104	14.4166	13.2904	17.6815	11.9045	9.92428	5.62272
HmN_000005900	300		2300.74	2236.8	2010.95	2095.76	2276.9	2323.75	352.535	452.405	504.879	1395.12	727.1	740.213	1119.29	230.849	221.377	151.5	194.979	159.784
HmN_000006000	5163		30.1265	31.154	35.5415	36.9477	35.7872	35.0728	28.7464	28.3369	27.9133	24.8149	26.1564	23.2974	41.4038	45.0666	41.6613	20.4683	13.1153	7.05828
HmN_000006100	603		21.17	21.029	21.0823	24.8913	22.5538	23.7609	38.542	37.2331	52.0175	39.0625	36.9937	36.3662	66.5355	64.7783	54.5261	28.069	35.6002	37.0354
HmN_000006300	969		2.33077	2.23998	2.40406	2.25063	1.28277	1.58722	1.8216	0.759667	1.60392	1.71588	3.03269	4.20142	1.54555	1.08949	1.2011	2.21664	0.594729	1.54288
HmN_000006400	2238		13.0314	12.3529	12.6693	11.7509	11.4022	11.285	4.20644	6.1672	3.91422	13.2077	11.8774	14.6769	3.97989	2.59446	3.12029	5.22104	5.02132	6.97256
HmN_000006500	3141		25.2291	26.2957	26.6572	25.8736	26.1651	25.591	21.3546	19.2759	18.8028	22.9385	24.1551	20.5026	15.5086	14.4862	17.2996	20.1047	17.6135	19.3962
HmN_000006600	975		30.5164	37.2594	31.0605	31.2491	28.8723	30.9678	24.1385	20.2904	17.9693	23.4955	20.1392	28.4697	16.8156	17.8659	18.1295	25.3785	23.6428	31.1469
HmN_000006700	3639		34.8639	35.1601	38.062	39.3952	35.8256	36.103	22.3531	21.0377	24.6162	24.8507	26.0986	24.1805	29.3068	43.2554	34.5018	14.4493	8.3142	6.85591
HmN_000006800	231		249.104	266.557	240.877	212.699	218.405	219.015	120.349	86.8364	78.2909	113.165	49.7297	61.2839	45.383	28.3351	41.2518	63.2288	36.7979	54.6082
HmN_000006900	474		0	0	0	0	0.154258	0	0	0	0	0	0	0	0.332587	0.668172	0	0	0	0
HmN_000007000	333		3.53861	4.11672	2.19862	1.34835	1.97616	0.486175	55.2154	52.7772	32.2465	0.277392	0	1.11143	1.42023	0	0.218444	115.33	109.461	74.9209
HmN_000007100	324		59.7058	136.452	64.0931	120.367	123.669	119.423	24.5156	16.4718	26.1649	52.7429	31.3327	30.2711	81.2558	13.6851	13.6952	17.7668	27.1249	8.94032
HmN_000007300	1443		40.4898	38.713	41.374	39.517	42.4115	39.0997	46.0751	47.0595	39.6554	37.2558	38.4159	38.665	40.9683	54.139	47.8391	51.5025	46.4269	33.5428
HmN_000007400	1626		0.0603914	0.140515	0.0818674	0	0	0.0497836	0	0	0	0	0	0	0	0	0	0	0	0
HmN_000007500	2763		35.4687	37.0873	40.4215	36.6332	37.0221	40.2836	27.3638	26.975	27.8184	29.5869	33.9863	27.7614	26.9305	38.6292	38.4112	20.4608	17.9374	15.7595
HmN_000007600	303		167.225	169.285	178.367	160.886	185.812	181.131	11.651	19.1318	16.3207	40.5459	18.5155	18.3221	45.2647	6.96839	7.68229	13.327	9.50978	12.6438
HmN_000007700	291		0.337445	0	0	0	0	0	0	0	0	0	0	0	0	0	0	0	0	0
HmN_000007800	1416		66.8512	61.3146	60.4006	60.8361	60.2604	63.2835	51.4205	61.2781	68.5499	128.054	150.745	137.222	52.326	51.8909	55.2241	82.3976	80.5833	98.5219
HmN_000007900	528		0	0	0.756343	0	0.138481	0	2.50728	0.522811	1.07038	0	0	0.35048	1.64215	4.19885	1.37768	0.162721	0	0
HmN_000008000	1389		12.9373	12.8303	16.0046	17.4557	13.5287	14.2198	16.838	14.8389	16.2754	11.0393	10.4822	10.7914	18.7269	15.581	23.0951	11.6906	9.02402	6.65992
HmN_000008100	612		133.175	136.452	115.063	126.818	127.24	128.168	97.1012	132.91	142.214	129.501	103.456	132.591	179.541	152.837	117.67	91.9535	86.3968	87.3335
HmN_000008200	2382		63.6092	60.4286	67.2288	67.2396	64.9836	63.6846	96.21	96.148	91.5246	87.0975	85.0132	78.0767	89.1805	96.3525	111.647	84.9069	77.8431	85.8697
HmN_000008300	2985		0.460552	0.344439	0.379059	0.687629	0.416418	0.189828	9.01781	7.70642	8.28337	0.371342	0.626488	0.495955	11.8301	11.3882	14.2072	3.48273	2.94421	1.43996
HmN_000008400	909		188.507	180.595	178.733	172.459	178.894	171.603	144.505	143.64	134.762	212.383	232.472	209.585	133.626	152.375	173.492	136.578	129.808	124.176
HmN_000008500	2319		6.81743	6.45334	6.05597	7.13621	5.39163	4.99162	14.2083	11.5465	17.6689	3.10693	4.78086	3.03235	20.9379	19.0292	24.9373	6.59474	4.47316	1.00734
HmN_000008600	447		40.6406	39.1019	47.9457	47.2103	56.9241	54.8708	13.8209	16.0563	20.8617	27.0708	25.6992	19.6645	20.9842	8.26619	4.55653	1.34545	2.57849	4.59887
HmN_000008700	4698		32.4186	34.189	36.0276	35.4711	32.5436	33.9782	8.48498	10.4197	7.81941	14.5498	17.5998	14.7121	6.49308	6.98864	6.89018	12.0701	10.1507	11.4961
HmN_000008800	3585		50.8101	48.4679	53.6179	55.2684	54.6193	54.0783	54.4063	59.8288	54.6639	66.5795	66.3223	61.4522	49.4925	50.7978	58.2745	65.1386	55.5797	59.0618
HmN_000008900	1488		107.237	111.552	107.978	107.379	102.503	101.294	1073.25	1862.56	830.083	2762.14	2399.7	3450.47	639.431	941.839	1248.44	283.849	675.924	389.336
HmN_000009000	1113		0.0882267	0	0	0	0.0656946	0.0727296	1.58592	2.06682	2.79281	0	0	0.166265	3.25773	1.99191	6.1435	0.540357	0.647229	0
HmN_000009100	960		68.5329	66.0443	71.8274	70.2899	72.6611	75.3829	49.3377	57.3175	52.984	60.5225	51.8999	70.648	62.3195	66.0919	65.7706	43.5849	44.8728	44.287
HmN_000009200	2430		27.8021	27.549	30.6496	31.8867	26.148	29.2146	41.4647	41.9557	42.3872	42.5365	38.6436	38.648	50.4402	58.0424	58.3131	36.771	31.3048	28.7244
HmN_000009300	675		162.788	161.119	147.513	149.667	157.827	147.625	59.4913	55.0725	77.4482	87.4449	79.1562	93.6233	89.6831	76.9496	80.2853	39.9672	35.6448	39.7296
HmN_000009400	2271		68.491	70.7768	76.5815	76.2032	71.8624	69.7558	51.6221	56.319	54.936	62.5571	58.9947	63.8438	65.2867	86.2792	75.2721	37.8322	30.9589	27.3204
HmN_000009500	2508		0.391533	0.318849	0.185769	0.38363	0.291539	0.516415	3.69494	4.1458	3.99986	0.110492	0.21304	0.14757	4.55715	4.54612	7.483	0.719399	0.402118	0.0745141
HmN_000009600	495		0	0	0	0	0	0	0	0	0	0	0	0	0	0	0	0	0	0
HmN_000009700	726		0	0	0	0	0	0	9.11739	8.61845	3.30846	0	0	0.254894	19.2172	9.8882	16.5322	6.50885	11.51	0
HmN_000009800	270		0	0	0	0	0	0	0	0	0	0	0	0	0	0	0	0	0	0
HmN_000009900	756		9.22215	11.031	9.50832	9.75718	11.1225	12.0994	5.83706	8.51988	3.36406	2.93243	4.94727	7.221	4.17053	1.67573	2.30926	4.20492	4.76432	7.04513
HmN_000010000	738		30.3371	22.6001	26.966	24.8575	24.9671	25.8858	27.306	31.7937	22.9741	41.8049	38.3715	46.2633	35.1393	24.8907	20.7974	23.5165	20.1078	30.5138
HmN_000010100	2217		112.016	105.015	100.062	106.124	102.504	105.192	41.6003	40.6741	45.3124	35.5403	36.2108	35.5583	49.3844	50.0951	48.4617	30.8867	27.034	23.0546
HmN_000010200	870		1.91878	2.10094	0.535526	1.47455	1.26066	1.20957	17.7527	16.0761	22.7364	0	0.307072	0.744468	55.9009	61.0371	32.4411	10.3693	7.45206	0.537016
HmN_000010300	1281		104.942	98.9	91.0304	103.75	104.968	100.221	49.2609	52.4362	53.1632	51.702	54.3272	49.0442	53.7793	61.9746	56.6147	51.0404	45.5501	48.5804
HmN_000010400	2382		4.24611	4.50817	3.63248	3.85073	3.65283	2.92256	4.44616	3.63114	3.32169	5.27393	7.1779	6.87541	3.50766	2.3933	2.41251	4.11189	3.38711	3.76587
HmN_000010500	825		62.7266	65.497	65.4287	61.6549	67.2686	67.4077	35.6591	32.3446	43.8429	41.875	42.5825	58.3198	41.4657	61.0393	57.3116	19.7869	20.4322	15.4036
HmN_000010600	429		12.3604	14.1134	12.7221	17.7925	11.2489	16.2274	2.74301	0.857946	1.3174	1.29191	1.24547	0.64704	6.43078	0.738259	1.69561	0.400545	0.67167	0
HmN_000010700	1470		53.0394	43.131	48.8094	50.6598	39.9911	46.5864	59.8382	63.3462	61.0337	57.4336	53.5213	53.6906	62.8439	59.1773	67.8923	36.1201	35.5773	30.0663
HmN_000010800	2394		36.8339	39.5112	41.0637	40.2701	39.4605	39.2906	18.4943	14.3365	17.0564	33.9544	36.4907	33.8182	12.8738	14.1114	15.1013	14.9655	17.8136	16.6663
HmN_000010900	891		4.07774	4.10286	3.73503	3.5275	3.11839	3.45233	12.7118	7.84861	13.1618	5.80561	4.49751	4.77691	15.393	13.6259	17.3078	4.33923	2.42547	3.98513
HmN_000011000	1317		2.38594	4.07686	4.49786	5.35741	5.16323	3.31906	16.3065	11.1787	18.3453	5.54088	6.49117	7.79838	22.5038	20.521	26.2356	6.13226	6.34491	4.75363
HmN_000011100	4230		2.48393	1.67442	1.79377	2.32006	1.64213	1.85626	23.5767	21.8834	22.0454	15.9412	18.2838	14.1743	17.2553	15.6485	17.7469	29.6951	26.2261	30.4842
HmN_000011200	792		1.48782	2.59634	1.59672	1.13384	0.461604	1.22649	1.4858	3.60158	3.92474	5.13174	5.22836	8.99565	1.99048	0.933078	1.0103	0.433923	0.909553	0.117981
HmN_000011300	942		2.08485	2.78927	2.47297	2.5875	3.41528	3.26542	3.27916	4.49329	3.89974	7.55053	6.52283	8.54546	2.09191	2.68971	3.3977	1.3681	1.3765	0.99194
HmN_000011400	5061		14.3385	13.4306	15.3474	16.4254	14.9819	15.1468	9.62024	8.85421	7.09105	7.4284	8.10272	8.39157	8.90867	11.6606	10.3342	6.56981	5.8358	5.76042
HmN_000011500	567		2.25142	0.805918	2.93467	2.03628	1.28956	1.71319	1.81597	2.43425	1.49514	1.46621	1.4135	1.1423	1.11214	1.11715	2.05268	3.1821	4.57375	2.96637
HmN_000011600	567		100.621	82.0022	103.418	105.547	105.099	100.935	24.3859	24.9916	27.6601	72.1702	81.0409	73.4339	37.5348	24.7636	28.7375	20.911	22.3606	21.259
HmN_000011700	456		67.4023	54.1131	59.4061	58.657	63.4973	63.0188	59.0311	57.711	87.0673	56.3141	50.384	57.0175	157.473	118.304	52.0039	29.0158	33.4907	26.8437
HmN_000011800	3378		14.244	14.5758	18.3045	18.3998	14.7405	13.4195	11.0603	11.4678	8.19804	12.7428	12.7724	13.0929	9.94038	10.8759	13.1142	7.12158	7.42118	6.03022
HmN_000011950	4104		3.06265	2.67225	2.82191	2.84454	3.31383	2.32745	1.07525	1.21072	1.85909	0.450153	0.195287	0.541092	1.99746	1.13185	0.567187	0.586177	0.561689	0.910728
HmN_000012000	519		0	0	0	0	0	0	0	0	0	0	0	0	0	0	0	0	0	0
HmN_000012100	1224		42.1988	39.0129	42.6864	42.3427	40.6809	44.905	24.0349	20.2974	26.3188	29.3566	33.1758	31.7493	27.6267	25.7028	33.1617	15.8637	16.0081	16.4895
HmN_000012200	1812		31.8109	32.0903	36.5482	35.1865	34.8642	32.4328	30.9287	32.4997	36.0244	41.037	44.1568	38.2975	29.1454	33.6173	35.7285	32.527	25.3639	26.8152
HmN_000012300	666		1491.82	1466.58	1394.12	1392.46	1521.32	1541.42	255.095	206.549	221.483	367.821	395.514	409.84	229.368	265.671	339.68	185.637	170.898	188.986
HmN_000012400	1221		0.56296	0.467809	0.490601	0.630397	0.718605	0.530372	24.9373	22.7587	24.532	0.832175	1.42219	0.909353	74.175	101.68	42.9539	16.536	2.9499	0.918336
HmN_000012500	1404		217.655	200.976	206.169	205.769	219.302	210.154	189.839	176.034	200.665	288.365	303.781	332.015	178.25	172.418	193.667	190.498	204.514	201.323
HmN_000012600	855		69.1394	71.75	71.1511	64.8931	74.6574	75.7409	47.3109	47.8907	35.8597	47.9683	47.8062	52.8105	40.1951	40.9937	43.5599	37.6828	39.9361	42.0756
HmN_000012700	876		1.34516	0.782458	0.683817	0.659002	1.33549	0.924065	36.2697	24.6843	40.0001	0.210894	1.06739	1.26749	96.0993	129.313	63.6905	21.5773	5.92081	1.38668
HmN_000012800	1986		13.8444	13.7478	18.0304	17.4407	17.1566	16.9559	12.443	11.5829	14.2287	9.16272	11.3668	10.2031	23.8533	34.8183	30.4372	6.31614	4.78793	2.72888
HmN_000012900	603		2.27985	4.16792	4.084	2.3402	2.5464	3.4903	0	0	0	0.919118	0.443039	1.22755	0.261436	0.525229	0.361899	0.284965	0.477855	0.619839
HmN_000013000	1917		24.6387	26.1015	27.1163	29.1771	23.915	26.6871	143.718	154.318	156.326	210.088	212.732	202.526	114.554	128.26	152.845	152.607	166.545	160.95
HmN_000013100	447		0	0	0	0	0.163575	0	0.329069	0.205849	0	0	0.896484	0	0	0	0	0	0	0.418079
HmN_000013200	1653		23.1085	24.2576	26.6958	25.3002	24.1073	22.3305	18.4201	23.7134	19.8303	19.0554	19.6364	17.968	15.1161	15.6473	17.2063	24.4808	28.8495	27.9248
HmN_000013300	780		167.186	170.333	159.057	160.028	181.764	180.784	123.521	138.376	173.534	90.595	82.8857	77.5801	314.686	278.004	123.195	54.7444	34.1712	14.2557
HmN_000013400	1308		108.857	111.881	116.68	118.282	116.832	113.686	125.165	139.921	92.7895	106.778	103.654	99.1054	144.208	124.054	128.243	87.3619	78.0947	114.158
HmN_000013500	3726		97.4321	100.074	99.2121	100.897	99.3942	96.7857	51.3999	50.7488	40.385	48.3921	57.6464	41.7686	31.965	37.2871	37.757	61.8435	55.9511	57.4538
HmN_000013600	2502		16.7978	15.4784	18.0628	17.6124	17.9142	16.5326	20.9294	21.7717	25.412	26.877	28.8828	28.6603	22.4939	32.5321	31.9808	14.6972	13.7048	10.7558
HmN_000013700	891		4.40837	4.4875	4.33263	3.81546	4.18521	3.45233	6.93372	6.093	8.24592	15.6544	13.0428	17.2384	9.11198	6.16128	7.51093	8.0999	5.98284	5.5582
HmN_000013800	1746		50.3917	46.3237	56.5326	55.9872	52.8912	51.4155	38.9217	41.5805	46.935	69.0405	53.5529	61.4195	43.2037	37.9717	35.496	42.0235	38.9476	40.0307
HmN_000013900	624		0	0	0	0	0	0.259449	0.235727	0.294919	0	0	0	0	0.252638	0.338369	0.932586	0.688436	0.692659	1.04821
HmN_000014000	525		0	0	0	0	0	0.46256	0	0.525798	0	0	0	0	0	0	0.277111	0	0	0.177982
HmN_000014100	1269		103.226	98.6649	98.0803	98.9691	95.6469	93.642	57.2611	52.4969	70.033	55.6849	52.42	59.4241	70.0028	86.8528	74.2894	46.1744	40.0771	33.7977
HmN_000014300	1194		99.101	107.35	107.363	113.244	100.063	103.388	70.9598	69.2807	57.0369	79.6065	76.2973	72.456	70.7031	72.4143	74.4475	52.8165	44.1631	55.1723
HmN_000014400	375		0	0	0	0	0.194981	0	0	0	0	0	0	0	0	0	0	0	0	0
HmN_000014500	1164		51.9665	46.1274	59.9253	55.9872	58.6703	57.5816	42.7128	54.94	51.8308	53.8833	54.1649	60.4921	53.6999	55.9599	57.4934	47.6085	38.6175	37.1676
HmN_000014600	1884		16.3661	16.4931	14.3432	15.525	13.8552	15.7685	46.2206	48.0098	39.5974	36.5759	41.7603	34.0836	35.9389	36.8154	38.4172	62.0206	62.0952	63.9305
HmN_000014700	2784		51.3908	51.7029	50.7554	52.3234	52.4485	52.6569	29.4822	25.7469	29.2325	30.5914	28.3561	28.0172	31.9086	43.6088	37.2592	20.5842	17.3881	17.7215
HmN_000014800	1260		56.5019	59.3861	59.5855	58.8994	58.3784	58.3982	52.4168	56.9615	59.2075	68.3255	68.9083	77.0321	60.8689	63.594	55.5377	58.0279	57.5149	59.8466
HmN_000014900	12345		0.0954521	0.138808	0.0808727	0.0883296	0.420525	0.636044	12.9757	15.742	13.9517	1.6237	1.55812	3.40276	9.09865	9.99697	8.21401	22.2082	23.2128	14.8809
HmN_000015000	1590		63.1174	59.1312	66.1396	64.6673	63.9208	59.9728	60.9653	63.7158	67.9795	86.3295	90.1429	92.8176	67.9167	77.1532	86.2378	51.1718	51.6489	46.9554
HmN_000015100	2310		32.137	31.0077	32.9045	37.1806	30.7349	32.7647	17.5748	17.8851	16.331	22.8329	23.7661	18.7857	16.4471	23.0337	21.4446	14.1335	10.6028	11.2048
HmN_000015200	1653		1.84155	1.3822	1.77166	1.04771	1.45971	1.02838	4.09336	3.45125	2.13688	0.447048	0.0808083	0.391825	3.62405	1.72439	0.7481	1.81917	0.871586	2.93945
HmN_000015300	1587		260.496	269.653	280.534	265.625	272.569	275.285	142.089	130.282	147.79	176.478	190.39	179.165	141.107	165.774	166.339	119.699	104.946	100.624
HmN_000015400	3195		21.1453	17.2699	19.9154	20.1965	19.1778	19.7366	34.9895	36.1147	39.4906	44.7546	44.4	39.4433	41.5455	42.7902	45.7624	32.4037	31.5202	30.8544
HmN_000015500	7122		18.9306	20.2589	20.1861	20.7145	19.8554	19.8222	15.2629	13.1653	14.5219	13.9167	14.5542	11.1728	13.2036	17.4321	16.8321	13.3906	10.7013	10.7453
HmN_000015600	1332		0.368605	0	0.749529	0.0481553	0.548934	0.121544	0	0.414481	0.53037	0.416087	0.300847	0.208393	1.42023	2.6155	0.709942	0.516017	0	0.280603
HmN_000015700	945		0	0	0	0	0	0	0	0.09737	0	0.0977475	0	0	0	0	0	0	0	0
HmN_000015800	1656		12.156	11.1066	8.84228	9.41227	8.25669	7.43002	39.7935	43.8959	40.0153	40.6077	42.0249	45.4811	44.7425	38.2504	38.5672	48.7173	46.0234	37.1844
HmN_000015900	885		707.236	712.541	724.168	726.952	720.605	718.105	310.31	303.285	332.712	424.908	463.064	481.766	320.458	303.591	295.487	205.521	245.169	258.889
HmN_000016000	375		4078.42	4034	3957.64	4009.53	4601.17	4562.45	34.1258	51.2828	62.5447	149.765	74.0902	100.422	170.678	33.7828	45.0029	34.5958	37.2669	21.6782
HmN_000016100	1053		50.9166	50.6643	49.5552	53.4828	44.9263	44.3562	1.95566	2.53412	3.48866	7.89499	4.69356	4.83283	1.57197	0.40103	1.45069	2.52937	3.28372	3.19455
HmN_000016200	279		0	0	0	0.229903	0	0	0	0	0	0	0	0	0.28252	0	0	0	0.516391	0
HmN_000016300	8289		26.6311	26.3649	30.8903	29.6996	27.0014	26.846	15.1371	15.63	16.5171	18.1979	18.9994	16.2751	15.1389	17.8945	17.8585	14.0655	11.3847	12.5467
HmN_000016400	1686		1.45606	1.21963	1.22379	1.33155	1.08419	1.05626	40.6558	37.9847	56.2313	1.69841	1.1884	1.75614	64.9378	72.4471	94.4434	16.6636	14.8688	2.49397
HmN_000016500	615		6.22709	9.28771	8.87443	8.65668	7.96571	7.10763	62.9035	45.4837	65.0167	6.30829	8.47068	7.97384	155.724	181.617	123.72	29.6169	18.2727	1.97517
HmN_000016600	3024		0	0	0	0.0848451	0.531944	0.133843	0.0486421	0	0	0.0610922	0	0	0.0521316	0.0698222	0.0481096	0	0	0
HmN_000016700	408		0.722032	0	0.978797	1.10049	0	1.98402	0	0	0	0	0	0	0.193194	0	0	0	0	0
HmN_000016800	1878		637.388	642.366	611.428	572.675	519.496	555.43	380.658	342.336	348.562	735.036	722.72	666.113	350.129	353.309	347.595	234.647	275.181	268.729
HmN_000016900	1284		117.851	118.421	121.972	116.346	119.187	113.353	63.8094	54.7502	58.7611	77.5517	79.4799	88.7074	58.0737	48.1812	62.0344	62.3633	69.568	62.4394
HmN_000017000	1326		381.825	383.725	399.952	407.496	422.166	428.671	226.631	213.938	243.689	410.377	456.536	454.12	238.252	280.408	299.634	143.778	135.707	109.226
HmN_000017100	2193		38.3293	38.1838	41.8227	42.2062	40.3433	39.016	23.0065	26.4338	28.3483	45.1116	47.7536	36.1584	25.7352	24.744	24.1146	27.6987	26.2787	25.1391
HmN_000017200	1101		23.0998	20.4406	22.0652	23.653	20.8529	23.7477	10.2872	13.1211	12.9613	21.0583	17.1065	20.9257	14.0321	10.9311	8.06039	12.0174	12.3005	12.3909
HmN_000017300	2187		15.3558	15.0438	12.843	14.6646	13.9416	15.8047	11.7702	11.4861	10.5306	22.4276	25.8968	22.8461	9.58707	13.4196	16.0983	10.057	13.7683	11.1086
HmN_000017400	3264		31.8296	31.8847	35.4202	33.565	31.2723	32.6619	15.1871	15.5331	13.4624	18.5648	19.6845	16.9519	12.7749	17.3688	17.8734	12.6085	10.8143	10.6781
HmN_000017500	1215		174.329	180.15	168.833	178.175	174.34	176.687	75.1813	65.1297	81.2857	96.3247	101.914	108.29	72.0112	82.1977	86.8111	59.6821	58.8151	56.6028
HmN_000017600	1200		935.893	903.058	881.619	885.813	948.89	936.569	1230.44	1473.23	1214.51	1033.64	974.661	1016.56	1158.37	1189.17	1181.93	1428.22	1315.99	1582.11
HmN_000017700	444		1.10581	2.05836	1.19925	1.58913	1.6468	2.73473	1.65646	1.24344	0.318222	1.66435	2.40678	1.25036	1.77529	4.04214	3.11282	0.774025	1.94693	1.05226
HmN_000017800	6654		42.9	40.3115	46.2827	47.9867	44.0093	44.002	24.383	29.4961	25.8417	25.2099	25.7557	24.8907	25.9071	31.8903	30.3582	22.9705	16.2824	14.3939
HmN_000017900	1125		90.8644	87.0246	90.8742	89.743	92.0313	89.0069	70.3435	80.4822	67.9451	84.489	96.531	87.2629	87.5111	75.4481	85.9322	53.7648	54.8118	52.0776
HmN_000018000	3561		43.7623	44.6561	48.914	47.9135	44.187	48.6007	27.1386	29.0695	25.5125	27.4961	29.9337	27.0227	23.3746	25.3477	27.2092	27.9634	24.7202	18.7879
HmN_000018100	1284		48.9452	50.1797	54.9987	53.4024	53.4149	52.7045	31.0455	33.5381	34.6624	32.8048	39.6359	35.5983	35.1757	25.2417	30.4223	31.7839	30.1836	22.9235
HmN_000018200	1461		102.296	96.802	108.789	112.963	103.646	110.092	60.4081	64.6181	61.4097	91.2966	99.1993	105.89	67.4393	72.3317	80.1603	43.1054	51.3772	37.8624
HmN_000018300	3159		28.7533	27.1946	28.844	28.6298	27.5205	26.9058	17.4613	17.2145	17.3538	18.3632	19.5354	18.5991	13.0249	15.6736	17.7537	15.9921	15.3696	17.008
HmN_000018400	1491		273.58	281.038	287.348	299.807	272.513	273.519	125.982	129.722	135.605	181.831	183.925	178.227	158.65	154.498	141.385	97.7873	90.9275	93.4407
HmN_000018500	1650		0	0.48465	0.363045	0.310996	0.22157	0.294357	12.659	10.4283	14.8141	0.279913	0.16191	0.280384	16.8156	13.6923	24.5999	3.85324	2.96878	0.566307
HmN_000018600	2319		19.9865	18.424	21.0954	20.4405	19.454	20.6646	39.8974	42.0593	36.8002	47.3608	46.6566	47.3207	37.9669	42.7474	40.3702	42.5323	39.5751	43.7991
HmN_000018700	1926		54.4516	62.4577	62.8951	65.142	61.4632	61.2364	56.8213	61.6775	59.9348	70.5015	88.8427	84.696	58.7694	69.1748	72.1752	49.0252	46.9771	43.0332
HmN_000018800	3075		63.5482	65.9799	72.056	73.6131	71.0494	70.6288	71.2747	69.9611	68.8304	75.2188	89.8327	76.5188	90.3325	108.627	94.0793	51.6898	47.181	33.3348
HmN_000018900	882		0	0	0.0754628	0	0	0.275334	219.307	202.078	270.887	1.15202	2.72604	1.8883	576.606	754.917	469.192	104.23	29.076	2.75449
HmN_000019000	3114		18.7311	17.4623	21.3739	22.5551	20.3341	19.7041	22.4372	25.1164	27.7681	22.1288	27.5388	23.3248	35.0071	43.5981	35.7401	14.9265	11.8442	6.72149
HmN_000019100	1350		132.674	123.97	134.3	134.272	131.342	133.474	93.9221	86.0848	96.7056	117.893	133.18	131.593	96.6896	108.23	117.788	65.1059	69.0484	76.829
HmN_000019200	363		0.270513	0	0	0	0	0	0	0	0	0	0	0	0	0	0	0	0	0
HmN_000019300	705		0.417857	0	0.188818	0.272948	0	0.34446	0	0	0	0	0	0	0	0	0	0	0	0
HmN_000019400	312		4.09152	6.95685	4.90654	5.34524	4.68706	3.89173	0	0.589838	0	0.592124	0	0	0.505276	2.36858	0.699439	0	0.461773	0
HmN_000019500	576		0.34096	0.793325	0	0	0.380823	0	0.510742	0.159748	0	0.801835	0.695709	1.12446	0	0	0	0	0	0
HmN_000019600	522		1.69304	2.18848	0.255012	2.08894	0.840437	2.32609	0.845367	0.352547	3.7894	54.1487	28.9159	47.5041	1.81202	0	0.139352	0.493775	1.93202	1.07403
HmN_000019700	663		0.148109	1.89537	0.803116	0.193493	0.330851	1.34303	0.221861	0	0.426216	3.48308	3.6265	1.67469	0	0	0	0.388764	0	0
HmN_000019800	411		7.40654	8.89451	5.02021	6.55475	5.33708	4.72689	0.715785	0	0	0.224748	0.325003	0.675377	0.383567	0	0.176987	0	0	0
HmN_000019900	675		884.058	906.126	733.126	741.587	680.16	650.942	1.08958	1.63582	1.67456	3.01062	0.989453	1.782	1.63485	0.469205	0.215531	0.381853	0	0.276861
HmN_000020000	657		0	0	0	0	0	0	0	0	0	0	0	0	0	0	0	0	0	0
HmN_000020100	1104		0	0	0	0	0	0	0	0	0	0	0	0	0	0	0	0	0	0
HmN_000020200	528		71.6015	76.3756	75.8865	68.6377	77.134	87.6937	47.6383	54.5466	54.8572	59.3066	59.4515	55.7263	93.4531	86.3764	64.8889	34.4969	30.8338	41.4112
HmN_000020300	1035		15.7494	14.4592	15.691	15.1216	17.0962	17.6756	27.4291	27.2932	37.4045	40.0722	46.4613	52.0295	29.8537	30.3963	37.7413	39.2644	41.3427	46.0433
HmN_000020400	522		3.38608	3.50157	3.31516	5.2838	4.76248	4.49711	7.32651	8.46112	8.93217	1.41565	2.30304	3.72234	17.0632	8.69647	17.1403	3.9502	3.86403	2.50607
HmN_000020500	261		1.88116	4.81467	2.0401	1.96606	1.96102	0.620292	7.32651	7.40348	8.12015	3.18522	2.04714	4.2541	9.66413	9.70769	22.0176	4.27938	3.86403	0.716021
HmN_000020600	651		57.6206	48.6086	47.9505	48.0825	49.0823	50.1107	40.4452	51.5904	51.4376	49.0945	49.0395	55.715	60.4189	78.1648	73.6356	40.5168	44.7047	47.5098
HmN_000020700	2274		20.857	18.0853	20.5177	20.704	19.3888	19.7565	18.694	24.2783	23.2378	29.45	28.2542	26.6106	18.0939	18.1059	20.7605	25.3897	22.1115	26.9556
HmN_000020800	663		4.59138	4.82457	4.7183	4.64383	7.71986	6.83724	4.88094	5.13506	2.98351	3.62241	5.8427	2.79115	2.13999	2.22925	3.29148	4.53558	4.5634	2.81872
HmN_000020900	3189		60.7222	58.8568	63.7823	61.3269	55.4404	61.0474	47.832	44.4637	42.5334	45.476	53.8242	46.4229	41.4507	48.7633	48.791	44.1573	40.1182	42.8966
HmN_000021000	2151		144.487	141.697	144.38	145.73	133.659	133.521	285.435	269.884	260.511	675.63	685.207	696.036	211.99	294.333	335.572	168.878	165.842	151.217
HmN_000021100	1455		23.5536	23.79	23.1467	24.6432	24.7245	22.1981	12.1314	12.7113	9.90491	18.1569	16.8003	15.7073	13.5435	16.1803	16.1982	9.6841	7.82253	8.66976
HmN_000021200	753		356.011	363.046	376.633	359.813	377.825	390.873	249.259	272.622	214.281	198.237	199.566	209.629	316.13	301.712	298.598	194.083	154.788	144.939
HmN_000021300	4248		30.7442	31.5448	37.0551	36.9637	32.8412	30.9844	29.952	33.0326	30.8658	28.9639	32.5136	29.4047	30.6348	43.1927	41.6278	20.8724	19.6371	17.8391
HmN_000021400	1224		32.2508	31.8264	38.9344	39.5652	35.3046	36.7044	124.501	109.079	70.299	2.18854	2.29175	1.81425	125.254	116.784	95.6815	68.2281	35.9006	71.6837
HmN_000021500	4524		14.6513	13.9895	16.0952	16.22	14.0773	15.388	6.14517	5.53227	3.77899	8.18765	10.2751	10.2057	4.26871	5.55392	5.25786	7.84342	8.47115	7.70411
HmN_000021600	1809		32.6778	32.0803	36.2041	35.3513	36.8622	34.724	23.174	25.7885	21.7911	27.6246	32.711	29.1543	31.0238	36.1241	39.648	17.0979	12.6631	9.6075
HmN_000021700	945		6.23469	6.16527	7.39536	6.99123	6.11251	8.30895	21.0134	20.5451	10.6155	4.39864	8.76373	6.46218	8.92493	9.83096	8.77519	28.8208	23.4786	26.0052
HmN_000021800	1110		1595.82	1634.44	1659.76	1702.79	1813.26	1765.91	128.806	161.15	189.915	456.198	449.225	458.132	185.554	161.59	174.187	86.9231	79.6945	47.3096
HmN_000021900	1245		3.54927	2.75274	2.8334	3.76099	3.05393	2.53572	3.54443	3.84318	3.51808	5.41615	6.5447	11.3707	3.98863	4.4094	3.73933	2.82939	0.81005	1.2759
HmN_000022000	120		0	0	0	0	0	0	0	0	0	0	0	0	0	0	0	0	0	0
HmN_000022100	1230		0	0	0	0	0	0	0	0	0	0	0	0.0752249	0	0	0	0	0	0
HmN_000022200	1023		0.575932	1.78673	0.260247	1.06591	1.42948	1.50343	0.287573	0.179892	0.276228	1.53501	0.261146	1.80893	0	0.41279	0.284425	0.16797	0	0.18268
HmN_000022300	1020		0.192542	0.111999	0.391519	0.251541	0.286737	0.238083	0	0	0	1.26784	1.44053	0.907124	0.154555	0.207002	0.285262	0.842322	0.282496	0
HmN_000022400	1503		0	0	0	0	0.0972962	0.215431	192.7	257.31	108.859	0.30729	0.177746	0.184684	0.262219	0.702403	17.4232	170.405	164.587	190.176
HmN_000022600	1227		63.3034	61.5419	69.2705	66.5998	74.6078	64.6529	29.8503	31.7964	36.503	41.9322	37.7758	35.5176	44.6471	47.236	48.3166	19.8862	13.2684	8.52923
HmN_000022700	249		91.8866	83.9587	66.5582	77.023	73.4117	66.3189	1.77221	0.369537	2.26973	3.33872	1.0729	1.85797	5.38149	0	1.16854	0.345047	0	0.375264
HmN_000022800	1401		28.8772	27.8055	27.4119	25.3641	28.7044	25.3649	26.563	28.4385	25.2125	65.1413	60.0664	57.7879	26.837	21.928	24.1434	18.7042	18.7161	15.7402
HmN_000022900	270		229.852	228.055	237.144	223.075	249.414	243.444	27.2396	27.9452	36.1076	52.0017	21.768	39.7522	86.7053	17.9862	15.8954	24.184	23.4786	24.5714
HmN_000023000	1761		151.226	153.292	157.079	148.355	139.427	144.245	93.8861	81.9824	99.8903	112.776	104.221	96.4148	104.471	113.305	108.885	79.1352	75.8409	78.2652
HmN_000024700	1050		1.30928	2.71997	1.26778	0.977415	0.626726	1.61896	7.28465	9.11383	8.07375	7.56566	5.47026	7.6665	9.68397	6.33427	6.65067	9.49176	10.977	7.11929
HmN_000024800	996		395.546	394.216	412.313	402.632	391.431	387.104	311.319	277.892	349.538	679.152	789.655	702.032	297.565	343.53	430.9	210.565	234.914	190.165
HmN_000025000	1302		423.557	429.142	404.921	397.173	393.557	384.907	241.089	234.206	214.106	265.55	279.361	267.276	210.437	250.387	250.294	204.234	206.593	218.531
HmN_000025100	5535		45.754	45.4066	49.098	47.2583	47.966	47.1795	24.8478	26.2163	27.0839	38.8511	34.8481	30.7586	34.235	26.7218	25.9689	22.43	21.6045	21.5074
HmN_000025300	915		449.772	452.211	464.889	477.181	495.205	491.173	206.896	210.678	230.698	264.697	287.59	314.085	244.825	205.719	234.522	179.064	198.553	186.984
HmN_000025400	2469		12.4883	12.2614	12.1579	11.6127	11.7273	11.3439	23.7709	24.8205	22.2036	22.0359	21.8569	23.1973	17.7503	14.4097	16.1452	27.1078	23.808	24.1076
HmN_000025500	1350		3.56416	3.63872	3.15535	4.41873	3.30385	2.99808	4.14042	3.68059	2.51183	7.9371	8.21246	7.81336	2.97776	3.44084	3.55626	3.94581	4.48228	2.97626
HmN_000025600	1245		132.112	134.426	131.78	127.358	121.511	126.266	44.1872	48.7789	39.8338	85.4714	103.75	106.053	46.724	42.4828	56.5574	43.545	47.6772	43.4556
HmN_000025700	720		163.661	151.684	155.58	165.346	172.741	165.719	72.3211	75.7843	103.221	130.346	89.7929	98.9521	162.682	88.4158	64.4572	50.4761	65.2331	48.1479
HmN_000025800	591		949.398	944.839	925.621	929.475	1010.17	1003.7	507.735	466.612	373.428	412.623	433.049	469.052	394.382	474.266	525.931	605.343	546.552	771.874
HmN_000026000	2550		44.9008	44.4412	44.9986	45.1264	41.5483	42.3152	34.9564	39.9813	38.3424	34.1593	38.3966	31.7856	45.3155	57.5052	61.4739	31.9408	26.4417	24.6977
HmN_000026200	201		0	0	0	0.319119	0	0.402727	0	0	0	0	0	0	0	0	0	0	0	0
HmN_000026400	2169		25.896	24.7544	28.6915	25.9056	26.901	28.6994	27.5335	29.8655	31.1374	32.6643	35.7804	34.1696	40.3019	52.7612	41.7871	21.1128	19.595	20.0322
HmN_000026500	3900		29.5093	26.7143	27.5107	27.6143	26.0413	24.409	11.9561	12.1271	12.5712	15.8689	17.2621	14.6619	12.3489	15.1319	15.7607	8.92213	6.76036	6.06167
HmN_000026600	813		325.872	321.077	324.277	325.606	326.648	342.212	228.511	199.082	227.664	283.704	290.812	329.477	212.619	218.414	196.036	180.499	196.882	257.221
HmN_000026700	1596		15.6893	15.8904	17.0566	17.9246	18.1879	17.7518	18.4328	18.5644	27.1781	4.86165	4.85427	8.58017	31.1637	29.5678	36.6899	7.48273	4.15248	2.81025
HmN_000026800	8988		2.02118	1.90652	1.94017	1.94113	1.61888	1.8733	0.736451	0.501638	0.848876	1.06883	1.02545	0.936797	0.622656	0.963154	0.696015	0.592662	0.32059	0.2703
HmN_000026900	1119		49.5808	51.3513	50.677	50.5003	47.2425	45.357	32.7313	38.4011	45.2029	74.4584	56.8206	59.1212	45.4342	41.8888	41.2788	36.6241	37.853	39.1633
HmN_000027000	555		750.008	747.596	670.379	677.834	641.331	640.729	1422.17	1334.13	1391.52	1386.74	1505.2	1714.83	1035.92	1129.33	886.138	1582.88	1747.83	1473.5
HmN_000027100	2673		0.808201	0.854761	0.821706	1.24782	0.902692	1.51418	0.880472	0.860594	2.37863	1.52052	2.19878	2.24999	1.15006	2.05376	2.96627	0.25714	0.592894	0.104872
HmN_000027200	1713		41.904	42.5478	43.6339	41.6386	42.983	43.0022	20.0075	19.4987	19.0532	22.3784	28.072	25.4408	18.3138	24.3436	25.2664	15.9997	11.2702	12.6551
HmN_000027300	255		269.559	250.43	221.078	224.374	273.261	253.637	75.5658	93.0972	110.816	130.044	70.193	95.0666	100.461	45.5405	45.6419	82.8845	75.144	98.9372
HmN_000027400	1302		15.7627	16.5831	15.4894	13.3015	13.141	14.0509	20.6745	15.3358	13.2392	22.9155	21.4419	23.8779	10.0496	10.1355	9.94472	23.8218	25.1187	17.7982
HmN_000027500	987		97.6989	109.725	104.996	108.01	101.417	106.454	84.6497	83.0649	73.4368	68.8808	59.9536	56.0597	85.9307	77.4402	76.4267	109.855	118.09	88.5178
HmN_000027700	1770		120.332	132.117	121.271	126.256	126.118	130.889	84.9321	93.9381	95.7104	119.509	120.445	122.01	86.0373	97.9366	101.51	83.15	78.7926	93.1768
HmN_000027840	126		52.2155	47.1462	64.9735	64.6519	73.6984	64.2445	57.2032	62.8037	79.6162	98.9693	96.4717	67.5592	128.244	53.6234	43.2986	51.141	45.7375	29.6637
HmN_000027860	222		65.4642	49.4006	63.2603	58.6532	71.4713	72.1969	15.2395	28.1847	33.0951	45.3535	48.7372	42.929	63.5555	16.6441	14.7449	15.8675	10.3837	14.3107
HmN_000027900	1002		13.9161	17.8997	16.2078	19.6526	18.0971	16.7228	12.6248	15.1521	16.357	26.9186	23.5958	31.581	16.1265	15.488	15.8986	12.5188	13.2283	13.9881
HmN_000028000	2145		40.5604	41.4349	45.5513	42.5227	46.6319	45.7385	74.8156	72.5393	83.457	61.2795	66.4456	66.602	106.604	175.657	139.244	44.5406	35.2627	19.2545
HmN_000028100	1311		0.898823	0.69711	0.50769	0.58712	0.223091	0.432217	20.8691	16.7746	19.3992	0	0	0.141154	26.6952	28.5066	42.9459	7.40549	4.17603	0.570195
HmN_000028200	6804		30.423	29.3992	32.2911	32.7125	29.316	29.6357	16.5599	14.6326	15.5328	12.7615	15.5093	13.898	16.5547	19.4881	18.4955	14.4457	16.7704	12.7581
HmN_000028300	4101		5.2199	4.42916	5.98878	6.14683	5.83019	5.4676	1.57818	1.05455	1.37811	3.44619	2.80116	2.75256	0.980242	1.64754	1.06425	0.858959	0.948543	0.934179
HmN_000028400	1773		0.0553843	0.193298	0	0.0361776	0.0412397	0	11.5319	10.4314	14.1848	0.364692	0.452034	0.521865	16.8049	18.5777	20.965	5.66964	3.49416	0.474318
HmN_000028500	1263		30.9439	35.3661	31.4083	31.6905	31.4934	28.5209	51.0112	49.1036	52.4666	52.9508	54.1496	49.8897	61.3484	69.9628	68.2493	50.8154	54.9828	63.3296
HmN_000028700	963		1.63151	2.60982	1.58966	2.99733	2.12597	2.10146	0	0.47775	0.146719	0	0	0	0.0818515	0	0	0.446089	0.299217	0.485154
HmN_000028900	321		0	0	0	0	0.455564	0	0	0	0	0	0	0	0	0	0	0	0	0
HmN_000029000	1674		18.4192	16.9243	20.2378	19.8866	17.9082	18.472	2.63609	4.06755	2.19448	6.51124	6.14418	6.96437	1.69512	1.00904	1.21671	1.79635	1.11885	4.01896
HmN_000029100	426		0	0	0	0	0	0.570057	0	0	0	0	0	0	1.85031	0.495639	0.34151	0.201683	0	0
HmN_000029200	1668		9.12496	8.08165	9.49692	8.22936	7.80277	8.63834	15.4325	10.9778	14.8237	3.48885	4.72482	4.4932	29.5823	36.7727	20.7584	8.03539	3.71412	3.52924
HmN_000029300	1431		112.469	112.642	110.93	104.305	112.257	112.173	59.8243	63.8509	75.5327	117.804	135.35	142.961	67.8065	99.6692	111.019	47.0111	45.1047	43.6187
HmN_000029400	729		74.0851	70.3611	66.5582	71.7098	75.4249	84.1682	39.3461	36.7301	41.0886	44.3484	43.426	50.1345	45.5206	50.5409	66.0563	50.678	40.5144	55.1159
HmN_000029500	1008		29.6148	36.833	39.2878	37.6076	36.6316	39.671	45.3831	48.8372	46.2559	39.8627	37.8996	35.799	35.8926	30.1632	30.2369	51.5671	53.4557	63.4062
HmN_000029600	2352		10.6463	8.30563	10.0177	9.59961	8.45583	10.0153	3.81493	5.24233	3.48421	5.69466	5.79284	5.19282	4.79239	4.66811	4.94842	4.42004	2.81776	4.05228
HmN_000029700	762		0	0.14992	0.0873467	0.084177	0	0	0	0	0	0.242445	0	0	0	0	0	0	0	0
HmN_000029800	1614		35.3483	38.5751	37.0318	38.0724	33.5691	36.4617	82.296	98.6849	88.241	57.1169	51.8911	49.875	68.7626	60.046	62.2856	110.35	104.618	126.44
HmN_000029900	2445		18.1934	16.9139	17.5855	17.6032	17.973	17.0173	17.8678	17.8384	13.6379	30.6771	34.1999	29.7448	8.51095	8.80839	9.84765	21.7867	22.7453	18.4588
HmN_000030000	1239		183.316	184.774	177.113	191.549	173.559	167.384	195.057	175.712	183.484	205.841	202.143	199.093	212.867	196.231	163.449	212.122	213.028	218.933
HmN_000030100	1308		107.13	108.038	106.758	104.747	119.012	111.273	51.6178	46.7108	58.331	95.1962	101.612	113.465	57.5504	59.2425	64.511	36.2585	36.0183	27.0749
HmN_000030200	1371		3.43795	6.91599	5.53438	5.23997	4.74654	6.19952	3.43326	4.69805	3.60698	6.73752	8.28153	8.36857	1.60981	0.924036	2.81204	3.32137	5.46448	7.01998
HmN_000030400	279		0	0	0	0	0.262072	0	0	0	0	0	0	0	0.56504	0	0.521446	0	0	0
HmN_000030500	1845		122.253	121.545	129.076	129.85	134.07	129.166	75.8988	77.7013	79.3372	72.0447	65.7383	72.9682	102.662	86.3451	96.5552	70.2236	58.8787	60.9264
HmN_000030600	1404		0.699404	0.976401	0.474061	0.365486	0.624941	0.576553	6.91467	6.61929	5.23299	0	0.0951397	0.263609	7.74756	9.47433	11.1392	2.01941	0.923546	0.931745
HmN_000030700	2991		7.6167	9.8923	9.94702	9.69327	9.28949	9.3641	21.7862	23.1652	25.1309	8.73992	8.17266	7.36254	44.0629	60.8507	42.4144	16.6031	8.38139	8.31001
HmN_000030800	498		0	0	0	0	0	0	36.3304	25.498	44.5434	0.556454	0.268225	0.743186	90.2191	114.475	71.8653	11.9041	6.07537	3.00211
HmN_000030900	951		1099.78	1118.36	1219.11	1226.27	1415	1439.7	1006.15	662.583	663.071	1163.82	1396.58	1345.67	867.219	758.536	667.832	411.244	460.095	247.701
HmN_000031000	4968		30.5381	32.4689	34.4715	33.595	32.3939	32.7996	18.742	21.3553	19.4246	24.5617	26.1345	19.7048	15.9455	16.0864	17.2191	21.0814	18.7342	21.5546
HmN_000031100	201		0.488539	0.568353	0	0.638237	0	0	5.12267	10.9868	2.81175	0	0	0	0.392154	0	0	17.0979	17.2028	24.6386
HmN_000031200	1164		496.297	486.889	500.102	483.11	506.11	510.793	217.355	196.836	218.855	348.456	405.204	403.493	238.365	261.298	257.596	150.207	160.906	141.445
HmN_000031300	2808		17.7299	12.8153	15.9522	14.7337	16.3526	16.0282	46.0978	40.0434	37.7379	27.0732	27.5429	28.1073	49.6855	80.6446	64.8924	25.977	21.9086	30.9472
HmN_000031400	1269		134.565	133.144	140.197	137.232	143.586	135.424	73.0253	77.5128	74.9319	129.786	132.418	140.139	71.183	66.8035	70.9074	70.2094	70.8445	52.7215
HmN_000031500	1497		97.3436	96.8398	96.7028	97.7782	97.6861	99.9819	45.6905	43.9482	47.0969	49.672	44.7931	51.4243	53.0226	60.8603	62.1973	34.78	36.0905	34.5799
HmN_000031600	861		865.748	884.456	845.699	859.038	872.406	870.685	288.55	272.624	263.053	296.962	303.921	300.255	314.926	260.924	328.478	273.716	275.764	310.167
HmN_000031700	705		0.835714	0.972246	0.0944088	0.363931	0.933422	1.1482	224.292	233.495	107.621	0	0.568409	0.524974	0.894446	1.19797	2.57949	465.779	554.426	319.421
HmN_000031800	774		0.888081	0.737977	0.68794	0.165744	0.85021	1.35959	641.778	779.628	298.828	1.07409	1.03547	1.07589	2.95332	2.45514	3.94722	1722.44	2169.85	961.087
HmN_000031900	651		284.785	272.699	267.766	283.667	299.885	294.696	77.2751	91.0253	100.922	136.783	131.729	147.389	86.8143	99.4087	85.8151	79.8459	90.516	97.0291
HmN_000032000	912		77.5234	76.6603	77.7972	69.6991	65.6619	69.4982	37.7412	28.7546	30.6749	26.2327	29.293	27.9	31.4601	32.5279	31.665	31.3709	31.595	27.5609
HmN_000032100	1374		12.8642	15.7972	15.1621	14.9387	11.1752	18.0866	2.78343	3.41539	3.08495	4.23537	1.94434	2.69364	5.27782	2.68922	1.64119	4.00195	4.82341	5.50851
HmN_000032200	2226		71.199	69.1797	72.1795	69.3873	78.5707	80.8753	19.9561	24.9258	25.3892	34.7741	37.4445	38.4073	29.9924	23.9977	25.3256	18.6423	20.6466	13.8524
HmN_000032300	486		30.5096	26.5617	9.58657	12.9342	7.07109	7.49519	581.414	444.738	456.433	982.824	1233.79	847.59	613.879	471.594	442.138	563.233	654.258	932.677
HmN_000032400	507		2.32417	3.15453	0.787671	0.632573	1.15374	0.638644	42.0683	58.9838	84.9973	44.0905	38.9926	47.0846	92.8153	31.0258	16.3561	53.2108	84.3979	75.5635
HmN_000032500	657		0	0.17388	0	0.19526	0	0	3.13442	1.82069	2.79571	1.40596	0.203312	0.422496	1.67964	0.803433	1.43933	4.05391	2.19289	7.25339
HmN_000032600	525		0	0.652794	0.126778	0	0.278545	0.308374	3.9225	5.60851	7.80463	2.99107	0.254431	0.881206	4.95459	3.82067	2.494	13.4194	9.05603	16.0184
HmN_000032700	984		401.767	384.279	388.053	389.355	365.516	365.336	391.353	400.226	437.513	405.815	382.81	346.505	376.492	351.689	361.269	441.284	434.416	509.651
HmN_000032800	1131		3.90702	5.8584	7.47382	7.03246	5.36587	5.79734	6.37277	4.39327	9.24448	9.1473	7.55869	7.28106	8.01472	5.69393	9.84039	7.74847	10.7004	11.5665
HmN_000032900	672		34.1934	35.1897	36.0524	35.6031	42.761	47.822	20.1378	18.622	23.7587	19.7939	25.0455	24.3709	37.1829	57.8127	31.2833	7.799	5.35986	2.92002
HmN_000033000	582		79.4682	76.3555	74.9066	80.4541	89.3246	87.346	53.3278	48.0626	47.8252	56.3434	76.6571	80.9211	54.8511	67.8412	51.7441	28.0484	29.7058	23.2799
HmN_000033100	873		76.2625	76.5518	77.3844	84.7891	89.4503	93.8367	40.4382	37.101	39.1665	34.7054	28.7655	34.0218	52.1875	50.9112	45.6615	30.8041	28.3855	26.2233
HmN_000033200	1263		109.548	103.747	105.45	111.018	111.559	109.405	63.0069	50.1236	52.2429	208.732	212.051	209.375	58.9144	64.864	61.7988	40.8156	26.0085	27.2258
HmN_000033300	2211		26.692	26.0926	25.4372	26.5159	25.7286	26.6166	23.6175	24.6371	22.7496	16.2935	16.8556	14.6888	25.3474	28.5534	37.4401	15.971	13.9447	11.0303
HmN_000033400	2421		53.5395	52.4244	54.4067	55.2408	51.1011	53.2298	30.804	36.0305	42.1362	66.1213	58.5947	66.0031	42.065	41.7749	37.4675	29.7391	35.3488	30.4522
HmN_000033500	2508		22.239	22.7293	20.6468	21.3554	19.7081	22.1736	26.3338	27.7732	23.9991	20.5884	29.1332	18.557	18.5743	21.0048	25.2334	28.0908	27.344	26.4898
HmN_000033600	4698		40.9465	40.4626	47.3331	48.1003	43.4693	43.3343	4.32076	4.28932	3.51873	10.3618	12.5672	10.0247	3.57371	3.37072	2.95736	3.1821	1.90135	3.36132
HmN_000033700	4524		23.9196	26.1103	28.3946	28.9522	25.8758	25.6586	33.8797	29.6139	35.3227	15.0277	16.1213	13.3554	56.8	74.2311	54.09	17.8329	10.987	6.83662
HmN_000033800	702		0	0	0	0	0	0	0	0	0	0	0	0	0	0	0	0	0	0
HmN_000033900	1146		41.3007	42.2664	37.1123	42.2582	42.0461	41.3923	32.987	35.4088	33.535	41.6719	45.4579	51.1884	30.1949	28.4655	32.372	26.6147	27.1552	17.6119
HmN_000034000	3747		14.2826	13.8416	11.9545	13.3866	13.6987	12.9621	43.6139	39.4875	41.6293	31.037	28.2339	29.4347	34.2261	36.2328	34.2839	54.8015	53.7919	57.9298
HmN_000034100	342		138.107	139.625	140.317	133.725	159.278	148.641	14.6234	34.4382	46.6838	40.5138	17.9664	32.195	82.7411	29.3253	15.314	15.8268	21.4846	18.5789
HmN_000034200	369		0	0	0	0	0	0	990.193	1756.51	1455.03	2430.69	1138.11	1266.54	1752.69	461.48	346.164	567.656	562.237	340.843
HmN_000034300	414		0	0	0	0	0	0	3414.42	3739.04	4887.5	8248.94	4202.49	3843.66	6149.15	1987.75	1112.91	2237.16	3292.45	1498.21
HmN_000034400	207		0	0	0	0	0	0	9.23778	9.77934	6.82564	16.9571	6.45295	13.8567	4.56945	3.57004	4.21691	4.98069	5.56804	4.06264
HmN_000034500	1389		26.9351	26.8942	27.2175	25.5371	27.6891	28.3231	40.9829	59.0245	68.1532	90.6423	92.8013	80.8026	54.7051	57.0798	61.6393	58.8243	48.4393	50.723
HmN_000034600	483		0	0	0	0	0.605533	0	85.2718	78.6792	111.453	0	2.76555	0.766266	159.931	139.45	84.9406	31.6629	39.0757	4.64302
HmN_000034700	1104		136.087	120.654	133.9	125.729	125.837	123.328	92.4666	81.263	86.003	112.87	117.726	131.834	84.392	98.5904	118.798	78.9906	78.8226	72.1119
HmN_000034800	276		118.12	105.547	119.853	122.708	119.214	122.889	96.9967	87.0139	111.087	127.847	155.839	141.137	97.672	121.254	128.879	90.2749	87.6967	86.6696
HmN_000034900	513		50.151	43.4241	48.005	49.3888	49.173	49.2316	53.619	63.8542	64.4484	70.9441	78.8959	86.3943	55.1607	63.3838	59.98	54.9332	51.3945	61.7474
HmN_000035000	2607		65.8409	68.9289	72.3026	74.5996	69.5281	65.3919	79.838	72.3552	72.1899	71.6791	69.5805	75.3132	55.1489	51.348	51.2289	93.8922	86.7092	134.731
HmN_000035100	342		4.01973	2.33822	2.33538	6.93943	2.13795	1.42014	2.15049	2.42144	7.84948	2.70092	0.781147	3.5171	10.3715	6.79112	5.95546	1.00488	3.37013	1.36609
HmN_000035200	492		0.798344	0	0.270562	0.130372	0.594456	0.164529	11.3609	16.0839	18.0921	0.187747	0.542993	0.564187	96.6063	42.7005	13.0107	8.55676	2.63548	0
HmN_000035300	1041		0	0.219479	0.0639368	0	0.140477	0.15552	50.4443	35.975	49.6757	1.68593	1.02652	1.77765	75.5671	62.7747	90.3506	15.3511	11.2103	1.34641
HmN_000035400	1374		26.7289	30.0147	27.1755	27.7299	27.2995	25.6277	22.5886	30.9394	27.6617	48.4042	48.4141	53.8055	25.127	17.9025	27.0531	22.1983	21.9151	18.7017
HmN_000035500	507		0	0	0	0	0	0	0	0	0	0	0	0	0	0	0	0	0	0
HmN_000035600	837		0.117319	0.955403	0.31808	0.919611	0.873573	0.967121	1.75739	2.08874	1.85687	2.64864	2.87261	2.432	1.50677	1.2613	2.08578	1.43708	1.37704	1.00474
HmN_000035700	1449		61.1271	54.0053	63.1591	59.8932	58.5853	58.0435	39.7935	44.1975	35.1033	58.2023	66.6498	61.0459	40.0915	37.8133	56.8279	27.038	31.5191	26.5684
HmN_000035800	3033		121.248	127.271	130.417	135.053	133.893	131.737	132.641	126.994	96.6627	111.132	115.696	106.743	89.4263	91.5437	107.158	141.552	134.62	161.188
HmN_000036000	588		598.363	607.331	505.865	486.089	354.523	381.75	32.5207	21.5953	13.9368	55.2972	83.5987	41.8573	19.7058	18.3134	30.309	20.3103	11.7611	13.3487
HmN_000036200	711		0.414331	0.803368	0.842509	0.992365	1.43974	1.25236	0.413766	0.258832	0.596163	0.259835	0.939354	0	0.110862	0.296965	0	1.20839	0.810538	0.394265
HmN_000036300	822		7.88438	5.83702	8.50196	9.12982	9.162	7.09034	7.69469	10.5224	10.1413	7.7538	6.98756	5.29045	6.42475	6.16474	7.43346	8.77982	11.0421	8.52561
HmN_000036400	309		19.385	15.8973	15.0779	17.8521	20.35	22.2673	57.5998	59.5564	77.7327	4.18511	6.48428	2.99439	125.76	85.0719	97.6952	54.7755	51.2882	26.9133
HmN_000036500	732		66.9399	56.3391	67.5584	66.9469	61.9306	54.9606	33.1564	24.6378	21.8113	38.6143	39.051	40.0696	21.644	29.5657	25.4397	24.0614	23.4217	19.9136
HmN_000036600	1713		57.4962	63.9551	64.6932	63.6935	57.8798	60.8646	36.4085	37.762	32.4152	47.399	39.5348	36.9999	36.3976	39.6893	40.5961	32.0997	28.1754	33.7652
HmN_000036700	933		90.7238	93.3012	92.4539	86.8988	92.3184	87.3684	86.7113	103.948	104.794	95.7375	95.4934	101.055	131.456	103.421	90.5958	92.3629	98.3651	56.7855
HmN_000036800	507		93.7417	70.5262	81.2614	85.9034	97.7792	98.0318	41.1979	43.1943	41.802	69.4152	61.6505	89.2417	33.115	31.6505	21.9516	31.3503	34.9527	50.3142
HmN_000036900	1941		935.42	917.089	951.566	955.732	994.195	1015.96	355.041	345.399	358.722	480.94	521.917	541.479	340.186	337.218	323.271	257.131	252.666	261.403
HmN_000037000	765		6.80315	5.37595	7.30835	5.95313	6.59496	3.17443	4.61471	5.65319	4.43265	9.17677	10.1273	7.74079	5.77005	6.62407	5.70523	4.38007	3.95495	9.03871
HmN_000037100	542		34.9666	38.7822	36.3491	31.4797	28.195	28.8247	30.3958	26.3142	37.2778	16.5314	14.0477	16.2178	39.5569	34.0866	33.5524	22.8266	24.9869	15.6884
HmN_000037200	2155		17.042	16.7515	15.8134	16.9063	16.9987	16.9409	23.0709	22.5447	19.6037	16.6311	14.1944	15.0705	19.0931	18.6648	21.3331	22.4062	20.792	24.1515
HmN_000037300	1188		114.314	119.335	105.72	106.203	115.278	112.496	39.9927	49.2604	44.9561	35.1447	32.8319	35.4374	40.6721	39.7225	42.3714	53.3003	58.6965	51.5182
HmN_000037400	2796		51.0298	53.8099	56.6554	57.3065	53.6094	51.2439	80.9647	76.7776	70.14	79.9164	91.7261	82.8306	71.1832	106.1	113.431	67.8178	53.0226	59.52
HmN_000037500	2073		5.35272	4.7944	5.52244	5.87899	5.36129	6.404	4.54125	4.21678	2.31736	2.4062	3.09294	2.54415	3.04189	4.63433	3.12302	1.03614	0.486499	0.811352
HmN_000037600	600		81.1757	92.3431	89.8536	82.9581	87.6198	88.3683	225.299	214.854	172.139	203.833	208.156	211.578	168.419	193.899	203.192	291.258	298.952	319.1
HmN_000037700	1587		41.9516	42.6146	45.2109	40.5794	39.4847	39.0713	39.2065	53.4578	54.4864	60.475	59.1708	47.4585	30.9431	28.6046	38.5022	64.5324	65.0917	61.5873
HmN_000037800	678		0	0	0	0.094606	0	0	190.05	174.394	211.311	0	2.36418	1.3647	308.084	339.291	414.134	88.0711	63.7492	11.7145
HmN_000037900	2607		37.1014	38.9998	40.8745	40.892	38.6766	37.0119	30.6939	31.8363	34.3065	44.7153	41.0412	40.4605	22.7368	29.6425	31.753	33.5165	35.4795	40.0716
HmN_000038000	696		62.7836	66.9676	61.4898	66.9076	63.1379	66.2937	39.7322	43.8921	46.6909	38.7535	38.0001	45.7316	54.0209	79.7851	78.2809	32.836	28.5662	29.5359
HmN_000038100	1971		22.0705	27.1832	25.1915	21.6738	19.6614	22.1776	28.9561	30.5782	27.6703	28.7284	30.0902	27.9317	19.1959	21.1571	19.6709	30.8185	32.8203	33.2328
HmN_000038200	2052		40.2931	37.5229	40.0582	40.9489	39.0889	36.8842	39.7841	51.1641	53.5004	52.7129	46.8688	46.4888	48.208	40.3866	57.0732	32.3235	32.2971	29.0067
HmN_000038300	1254		63.8981	71.7865	67.6198	68.593	70.4359	61.6471	24.6329	24.8748	29.8581	33.8106	34.8321	36.081	30.2972	28.7079	27.5537	24.3911	23.0931	27.7193
HmN_000038400	4995		62.0436	62.1624	63.9465	63.9759	64.3351	64.0292	64.7272	61.4721	66.3034	62.5056	65.5178	57.6833	64.5733	74.1006	73.5281	60.546	53.7931	47.6276
HmN_000038500	1812		0.162577	0.315229	0.293855	0.212394	0.282465	0.13402	23.9474	32.652	18.792	4.18016	3.75959	4.79995	3.69755	4.07835	9.3938	14.604	20.6727	55.6416
HmN_000038600	705		0	0.324082	0.283226	0	0.311141	0	44.2325	35.3702	31.8656	28.9561	29.1783	27.6924	25.3799	27.8528	28.7871	51.4282	51.7029	69.451
HmN_000038700	984		20.1582	22.4066	25.5005	27.8344	30.5402	20.4015	18.3867	18.1411	18.5229	18.9624	25.1134	23.8839	15.6204	17.166	24.7647	18.1613	15.6665	19.1819
HmN_000038900	462		0.425093	0	0	0.555349	0.158264	0.700849	21.9686	26.6882	31.194	0.399876	0.289126	1.00137	145.021	50.9575	21.4131	11.344	12.4739	0.202253
HmN_000039000	1701		71.1216	72.5326	71.7232	64.7462	63.7902	70.9545	45.7452	43.6001	47.7614	73.0934	70.3611	78.9278	53.9852	41.1485	44.9023	26.9216	28.0354	18.4574
HmN_000039100	6141		12.2965	13.2265	14.5667	15.3542	13.5615	14.5788	6.65886	7.7915	6.58022	6.69358	6.43845	6.04188	7.48312	9.28324	8.76549	5.34444	4.10565	4.92994
HmN_000039200	1209		170.483	169.988	160.973	152.744	157.364	159.553	114.244	129.308	125.748	120.488	109.49	113.802	115.529	114.303	119.552	138.007	142.881	173.124
HmN_000039300	2802		22.8844	25.4408	21.4972	23.075	20.6411	20.6559	17.3762	18.9809	19.8674	14.1425	12.3946	11.6566	18.4821	24.4147	22.3261	17.1711	14.9112	17.7744
HmN_000039400	2070		24.7151	24.7242	26.9448	26.6177	25.2558	24.7928	14.5673	16.6693	18.634	29.8087	31.5549	23.2881	17.9351	19.2272	20.6629	14.0704	13.1545	13.4067
HmN_000039520	1992		86.1683	92.7904	81.5605	87.166	82.4413	77.6565	69.7071	58.433	56.1758	63.2967	67.1234	65.1681	50.8867	55.3824	55.4692	65.5159	64.0084	67.9697
HmN_000039540	666		157.026	157.121	161.099	147.259	150.079	153.51	216.665	233.353	207.905	245.492	236.265	250.211	245.701	233.81	229.147	301.612	329.465	292.669
HmN_000039560	2058		10.688	12.0456	11.8045	11.906	10.3744	10.5413	8.64837	8.40562	7.14005	11.7596	14.0197	11.06	8.34957	7.18171	8.16489	6.97187	3.71034	6.2203
HmN_000039600	1050		65.8383	72.6777	59.4587	63.0433	66.5723	60.2099	42.1669	42.2391	35.3899	41.6111	30.7861	43.1791	50.8221	59.7231	39.8347	28.9662	27.7169	36.3974
HmN_000039700	555		0	0	0	0	0	0	0	0	0	0	0	0	0	0	0	0	0	0
HmN_000039800	498		4.33799	3.21153	8.28636	5.53844	7.04752	5.52657	45.7822	74.2769	65.2547	230.743	137.063	148.08	76.9237	29.4666	23.3708	34.6773	43.9741	46.3451
HmN_000039900	7110		14.7087	15.039	14.435	14.9667	15.364	14.8803	19.2815	18.2865	20.6869	18.7341	20.7785	16.228	15.3212	18.6346	19.7968	22.8749	21.5401	22.3811
HmN_000040100	10488		15.3923	14.7482	15.713	15.0511	14.7519	14.6799	25.3291	24.539	22.3495	15.0958	13.6531	12.6068	14.4073	17.2127	17.2006	36.0035	31.6912	43.4952
HmN_000040300	4641		19.0003	19.4213	17.6685	18.4371	18.4331	20.3373	18.6046	19.0929	16.1049	22.6301	25.0977	21.3722	13.2815	14.2854	17.2254	21.6597	20.4887	22.9726
HmN_000040400	930		0.633525	0.737025	0.35784	0.413825	0.628973	0.174082	0.474496	0.692584	0.607702	0	0.14363	0	0.0847559	0	0.312868	0.277151	0.929504	0.803791
HmN_000040500	912		4.5222	5.13574	4.59777	4.50125	5.53196	5.59181	84.5144	77.3851	94.6585	80.4198	91.3942	87.3525	66.8094	66.0977	76.3309	99.2	107.423	143.132
HmN_000040600	294		0	0.777135	0	0.436346	0	0.550667	0	0.312975	0	0.942565	0.454341	0	1.07242	0	0	0.292234	0.490045	0.317826
HmN_000040700	1473		115.796	115.557	119.199	121.58	116.651	117.658	193.229	164.477	134.768	139.153	152.438	136.246	123.827	136.461	137.385	199.714	206.867	191.639
HmN_000040900	2457		16.2262	17.2032	18.0956	16.5774	14.4332	16.5059	9.51889	9.92425	8.6258	10.7522	10.6013	9.11333	12.287	13.3199	13.0266	9.40644	9.90979	8.17654
HmN_000041200	330		7.14155	4.15414	7.66428	7.19178	6.42553	9.076	5.34887	3.06716	5.99415	4.47861	3.64299	4.76653	15.7646	11.5168	5.51074	4.16566	2.61951	1.41577
HmN_000041300	525		0	0	0	0	0	0	0	0	0	0	0	0	0	0.804351	0	0	0	0
HmN_000041500	3222		47.422	49.4964	51.6436	50.5459	47.3384	48.6894	48.2095	47.3496	44.6412	47.0458	47.6762	42.1568	43.5949	48.2966	45.3789	47.6249	41.6301	47.5904
HmN_000041600	441		23.3801	19.9465	26.5629	25.3081	26.6939	30.2867	43.6945	49.8674	45.8153	60.3242	70.2714	54.3411	38.6072	49.3144	48.9893	48.7057	51.2914	54.2422
HmN_000041700	1488		282.908	302.564	324.024	319.119	301.17	293.274	86.8921	81.9351	82.9893	200.635	213.022	197.428	72.0425	79.3202	71.324	69.2878	67.5827	78.8092
HmN_000041800	2349		1.29591	1.11856	1.24673	1.58377	2.0544	1.96426	0.12524	0.0391718	0.240597	0.825798	1.1373	1.10291	0.134224	0.359544	0.247737	0.18288	0.0613338	0.159116
HmN_000041900	5217		6.6443	7.46702	8.16509	8.64337	8.32512	8.13049	4.48302	4.60338	5.74154	5.52422	7.16912	4.50484	6.19464	6.25292	7.04132	4.47947	3.20347	2.59707
HmN_000042000	4065		27.4177	27.6253	25.69	25.7518	23.977	26.1264	33.0373	34.1575	28.71	37.0622	35.686	32.0258	29.6871	27.2173	32.944	31.0273	27.9286	17.3549
HmN_000042100	1641		53.9751	58.1985	51.0645	54.7618	53.7803	53.5214	26.9806	24.3915	33.2347	42.8927	46.6418	40.8786	28.0035	29.7864	35.1962	31.0997	31.6065	35.1328
HmN_000042200	2757		44.9488	49.5574	51.4698	50.1138	48.9575	51.8514	13.7117	17.1881	17.6805	36.2517	40.4072	31.849	14.9812	14.4744	17.7567	12.5588	14.4753	14.4042
HmN_000042400	918		74.3426	79.7681	90.4844	85.0347	97.0925	89.325	0.640932	1.10257	2.00085	13.2822	14.2598	13.0021	0.601047	0.92001	0.554675	0.935913	0.156942	1.11966
HmN_000042600	264		0	0	0	0	0	0	0	0	0.535192	0	0	0	0	0	0	0	0	0
HmN_000042700	1638		77.0344	80.3438	79.3172	81.1771	79.9924	80.0091	79.4738	84.3749	83.239	117.692	110.009	110.038	66.7445	58.7795	62.7941	105.377	108.451	116.772
HmN_000042800	4968		29.9451	31.5261	35.5969	36.9519	37.1036	35.537	29.9932	32.6348	30.2319	36.9634	32.8563	35.07	40.3	41.4167	39.9874	24.4538	21.3152	21.1596
HmN_000042900	1185		1094.99	1087.34	1146.71	1154.3	1190.13	1145.5	239.819	236.132	248.838	423.817	414.03	416.878	252.3	227.535	232.712	224.689	227.842	220.157
HmN_000043000	3456		40.0059	43.5337	46.1632	47.272	42.6734	43.4487	53.7982	48.7497	48.4869	47.7894	46.7285	46.2901	51.682	75.6654	60.1129	42.7595	40.8958	46.8555
HmN_000043100	1056		4.1845	5.84176	5.98772	5.52746	6.50862	5.51919	32.1768	26.4019	30.3721	5.07343	4.80672	5.52006	55.0119	47.6869	56.3473	12.6923	11.4604	4.15882
HmN_000043200	2604		25.5295	24.6991	29.4451	29.017	25.7205	26.4853	29.3171	26.2192	28.0519	27.8817	25.2892	25.5123	22.4603	29.555	29.7783	26.4283	26.6679	29.1374
HmN_000043300	1395		140.994	139.871	135.836	139.091	149.119	142.225	76.9738	70.5116	76.1653	88.5309	96.328	85.695	94.0226	71.5916	85.5171	80.3122	77.0456	85.2019
HmN_000043400	2187		30.7116	31.6024	33.4465	31.6462	33.0318	29.6847	20.3793	26.927	22.8055	31.1284	29.989	27.2461	18.9939	16.9918	20.1894	24.6711	17.8527	25.2508
HmN_000043500	324		0	0	0	0	0.225673	0	0	0	0	0	0.412272	0	0.243281	0	0	0	0	0
HmN_000043600	810		0.12123	0	0	0	0	0	0	0	0	2.50885	0.659635	0	0.194625	0	0	0.21214	0	0.230718
HmN_000043700	600		327.485	354.14	330.351	347.227	332.931	332.966	239.273	262.395	279.991	267.261	281.178	319.68	296.769	268.678	226.833	217.656	218.751	257.273
HmN_000043800	1113		134.458	131.996	138.738	140.561	139.47	147.496	598.684	659.562	635.998	425.672	458.095	456.315	481.791	481.283	501.545	781.588	762.695	847.179
HmN_000043900	1557		1054.18	1063.37	1056.25	1048.33	1041.45	1037.09	597.728	613.431	634.583	878.626	900.717	886.283	623.649	642.038	687.239	569.082	541.871	558.544
HmN_000044000	207		7.59006	7.17442	7.71689	12.7046	10.5968	8.21212	164.859	323.607	408.856	292.286	131.64	184.606	402.112	116.281	150.403	307.972	247.082	314.629
HmN_000044100	291		303.7	343.894	312.206	308.812	327.398	337.423	37.9108	43.952	30.1032	125.384	148.265	135.133	34.4004	52.2414	48.7444	33.0676	23.7646	17.3395
HmN_000044200	213		3.68813	3.75433	1.5624	3.31254	4.11933	3.0403	86.3227	206.925	197.011	166.962	76.5084	87.3139	209.455	55.5116	77.8644	138.758	90.6376	95.6342
HmN_000044500	1005		13.9722	13.8678	17.0204	13.7221	15.2056	14.9814	63.8138	63.632	82.1032	12.5	15.2848	11.2321	139.529	125.845	149.03	34.1103	17.7762	6.04343
HmN_000044600	3129		42.0842	38.8463	42.1812	42.2289	42.3893	40.6163	40.4755	38.7879	26.1449	11.956	14.2584	12.952	28.1133	30.3656	37.0102	49.6994	41.5782	47.9597
HmN_000044700	1029		223.017	230.476	235.767	237.746	240.885	245.598	93.3453	93.7137	109.298	82.6764	89.1806	100.799	120.877	183.647	160.823	64.1245	56.4252	57.6626
HmN_000044800	369		225.931	205.568	205.988	186.171	219.354	234.727	20.7287	19.2009	19.1451	16.2714	9.04988	13.2897	45.9267	11.7301	11.0394	12.5732	9.76105	10.1291
HmN_000044900	5049		36.2523	33.6902	34.9862	34.4662	36.4794	34.7905	26.2782	24.8762	26.6966	26.1984	29.763	31.9967	24.9942	35.044	33.3237	29.0644	29.6764	30.5547
HmN_000045000	672		53.9203	53.0395	52.2957	60.2294	56.253	53.1222	88.2125	87.2222	75.4812	72.4401	80.901	70.0834	50.2028	60.9547	65.7057	105.734	107.84	137.38
HmN_000045100	1998		22.9518	25.3292	25.8171	25.6507	24.4459	26.2129	16.4174	17.4542	18.174	28.109	26.9425	33.4819	18.3052	18.4934	22.5725	13.5884	12.8353	11.4579
HmN_000045200	1404		78.5431	78.0307	86.4214	86.3462	88.6895	83.6579	49.136	49.874	49.0089	70.3312	73.9236	76.0511	50.4714	65.042	71.7055	37.2061	36.5314	37.9353
HmN_000045300	609		74.4938	77.2848	84.8098	82.4694	82.1227	77.4922	55.0696	54.9973	56.3771	46.5649	32.4619	40.8697	50.4778	52.8722	36.3111	55.0206	53.9387	63.2144
HmN_000045400	936		0	0.2441	0.284437	0.479701	0.234353	0.172966	0.471455	0.196613	0.603806	0	0.428129	0.0988533	0.336851	0.225579	0.388577	0.458957	0.769622	0.19966
HmN_000045500	2760		21.774	23.7998	22.9095	25.3318	22.8097	23.1992	29.4188	26.8043	28.4629	26.1719	27.0056	25.2772	37.4981	54.4686	48.0728	20.3586	18.1657	15.4042
HmN_000045600	1410		6.96428	8.02103	9.72411	8.82533	8.45265	8.84114	51.3264	52.7942	50.2033	34.3281	34.1993	32.0234	44.4987	37.0622	44.7284	74.7659	96.8662	63.2216
HmN_000045700	2172		78.8012	80.2092	77.9577	79.6175	78.134	80.3145	52.4851	50.9216	45.5357	51.2466	56.2717	54.3999	46.089	48.9457	47.8247	58.5041	55.6526	56.0558
HmN_000045800	1347		320.687	311.167	329.975	320.619	330.415	327.819	461.702	417.242	434.256	591.602	564.253	619.592	379.895	366.717	370.837	464.41	528.589	514.305
HmN_000045900	1014		4.74519	3.26719	2.95377	2.59355	3.46121	2.07559	60.0561	55.9892	50.023	24.5048	16.0713	21.7173	85.5082	62.9887	62.8419	51.5162	41.2044	22.669
HmN_000046100	1533		0	0	0.0868339	0.0836828	0.0953921	0.316822	32.0478	37.8142	13.7328	0.0602553	0	0.120713	0.0514175	0.206597	0.284703	49.4876	52.9114	30.8421
HmN_000046300	987		0.298469	0.347231	0.741784	0.649877	0.963054	0.656114	0.894187	0.745813	0.572606	1.49741	1.21802	1.68742	0.878473	0.64177	0.368499	0.174097	0.291942	0.284014
HmN_000046400	2907		18.5448	17.1732	18.7975	18.2477	20.4992	19.0188	30.1575	26.62	31.1063	27.8353	35.1516	24.9539	33.7038	43.1799	36.7587	26.7179	22.5502	20.636
HmN_000046500	1629		20.6158	18.2333	18.9583	24.6885	25.1357	24.7466	22.6645	20.9561	21.0765	26.8779	29.6016	26.923	27.8227	28.9689	29.9183	15.7171	16.8041	16.1184
HmN_000046600	213		993.028	950.382	831.509	852.829	964.266	937.173	201.65	178.845	162.517	321.782	301.017	305.816	229.808	152.161	152.314	153.682	162.336	225.047
HmN_000046700	783		109.107	106.506	111.525	119.275	113.272	123.541	50.9099	50.0616	47.8187	59.8114	69.7735	77.0465	52.8507	67.6842	66.796	49.158	47.4724	44.1546
HmN_000046800	405		60.615	62.3378	61.4636	60.6586	54.1615	58.5624	42.4938	34.5339	45.0037	47.8963	51.1217	57.3437	42.6228	65.9494	56.7565	21.4262	19.2098	17.7653
HmN_000046900	552		32.5542	38.9074	29.7824	31.4904	38.9433	42.6737	90.8677	99.8493	59.895	22.9255	24.4406	35.368	82.6785	73.0583	41.5102	97.1234	85.8697	103.259
HmN_000047000	1284		202.052	204.011	203.096	202.12	204.947	203.631	127.619	133.364	118.292	63.8111	69.701	74.2952	127.259	140.268	165.765	116.563	120.51	112.216
HmN_000047100	699		69.1168	75.3421	71.4144	65.244	75.3147	83.4958	70.2852	81.352	81.8637	87.7462	73.7631	93.8504	93.9336	66.1519	80.2344	73.0109	58.7423	33.1521
HmN_000047200	996		46.8306	43.4704	48.1812	50.6188	49.6997	54.453	37.6596	32.8888	32.6274	37.9316	42.5137	35.1155	50.4911	63.5971	50.9776	27	30.6662	29.9273
HmN_000047300	2385		0	0.287393	0	0	0	0.237583	184.9	231.522	95.0824	0.11619	0.16802	0.387953	20.1602	9.02998	24.1252	154.002	133.381	267.315
HmN_000047400	1998		53.1774	49.1147	50.9347	52.5214	55.479	55.5049	28.8592	24.6846	23.6192	37.3092	39.9124	40.7525	26.2349	31.8087	33.1306	21.1137	21.9932	22.6353
HmN_000047500	1962		13.213	15.6045	13.6712	14.4501	13.118	11.4284	29.0889	21.5733	16.7072	17.8434	17.1566	16.5058	20.2883	21.2003	17.9074	22.5083	29.0056	33.6234
HmN_000047600	303		68.0569	54.6688	67.4369	57.5804	62.9829	57.4384	4.85458	5.7699	2.33153	10.67	12.7845	9.77179	12.2267	3.48419	6.24186	3.96975	4.2794	3.08385
HmN_000047700	3069		23.2612	21.8874	26.4585	25.7073	22.1093	25.8485	43.807	43.3839	51.7007	25.0718	27.5074	28.4002	76.1262	86.1356	65.3941	31.9424	24.9276	20.7646
HmN_000047800	708		116.365	109.882	101.906	111.072	113.705	117.192	94.3229	98.3829	90.4021	93.1542	110.747	128.466	131.038	136.437	111.578	64.559	52.0943	30.0911
HmN_000047900	1542		15.984	19.2621	16.7906	18.0948	14.7943	14.5937	27.282	24.6447	30.8787	21.6851	23.8219	19.9214	35.4244	32.1095	36.8426	15.991	12.0528	9.87733
HmN_000048000	525		4.1149	1.74078	4.81755	2.93225	2.92472	4.31723	8.96572	7.88697	12.918	5.10242	5.59748	3.87731	10.0593	9.45113	14.1327	3.76398	3.01868	3.20368
HmN_000048100	1197		4.42991	3.62663	4.05911	3.48311	4.21483	4.26042	11.1826	12.0688	16.5252	8.95161	8.70421	7.57528	14.4871	17.7275	22.4241	7.39301	6.86063	5.46437
HmN_000048200	2589		18.6607	21.9741	24.7826	25.568	21.5203	24.3563	13.2379	15.0692	12.0062	14.4141	15.6329	14.7957	13.0002	15.5767	15.9026	16.1613	14.5798	20.8608
HmN_000048300	384		0	0.594994	0	0	0	0	0	0	0	0	0	0	0	0	0	0	0	0
HmN_000048400	720		0.272768	0	0	0	0	0	0	0	0	0	0	0	0	0.293253	0	0.119329	0	0
HmN_000048500	663		0	0	0	0	0	0	0	0.277571	0	0	0	0	0.118888	0.318465	0	0	0	0
HmN_000048600	1980		25.045	23.0786	30.0184	30.2573	28.1024	27.8003	73.0269	58.6942	68.8614	75.8565	68.0024	67.9931	53.7828	55.6114	55.1441	87.6525	84.6248	98.2543
HmN_000048700	1095		77.75	79.0804	72.0288	70.0007	72.3168	68.6765	59.5092	45.9653	46.5808	68.8357	74.2903	65.0644	54.3483	67.5848	66.7629	40.4084	38.6827	41.387
HmN_000048800	780		40.0339	34.8575	38.399	40.7061	42.8397	40.1627	19.8011	14.9819	25.1787	29.9615	27.7427	23.4875	34.4598	38.9801	31.8012	12.9977	8.1272	8.98468
HmN_000048900	696		36.4004	38.0796	32.2272	30.9655	30.0456	27.6805	191.476	200.819	232.033	127.807	119.758	144.108	121.859	117.554	104.096	252.566	250.679	278.308
HmN_000049000	1662		491.1	494.898	534.388	530.626	499.508	515.058	202.94	193.718	187.197	240.21	255.418	226.251	171.684	165.916	194.416	172.661	145.2	136.394
HmN_000049100	582		10.2921	7.4589	7.43348	6.39224	7.53794	6.67613	2.02191	0.632403	0	3.4917	2.06561	2.38471	1.35435	0.725575	0.8749	1.32861	1.98039	2.24771
HmN_000049200	5181		10.7654	10.8704	11.8317	11.4271	10.4011	10.9056	23.7633	20.4418	22.3349	9.21753	12.0659	9.67949	38.6584	59.9072	43.4822	13.2664	5.97872	4.90559
HmN_000049300	1263		49.9145	49.9286	51.7499	52.005	51.5242	45.1207	19.4495	17.7764	17.2278	34.5204	27.1806	30.0364	21.032	20.5625	23.3833	8.29917	11.7494	9.24789
HmN_000049400	1290		48.8698	48.7951	50.7184	51.8115	50.8992	51.8946	48.6892	50.0731	49.2874	67.8822	58.1936	65.7011	51.1433	57.614	57.3475	44.3571	35.1807	70.2616
HmN_000049500	474		0	0	0	0	0	0.170777	7.13746	7.18258	9.53861	0.389753	0	0	28.6024	18.9315	7.67318	1.63133	0.911855	0
HmN_000049600	273		0	0	0	0	0	0	0	0	0	0	0	0	0	0	0	0	0	0
HmN_000049700	624		0	0	0	0	0	0	0	0	0	0	0	0	0	0	0	0	0	0
HmN_000049800	504		91.1823	89.0791	89.0084	83.8693	92.8483	97.1698	496.734	349.619	280.619	118.58	169.886	178.444	91.0218	124.633	95.69	1010.89	1117.42	1008.2
HmN_000049900	507		146.229	135.87	160.029	159.914	170.032	177.703	84.1365	92.3776	111.472	116.056	119.086	161.511	122.51	130.558	92.5412	66.9372	68.7686	65.2426
HmN_000050000	369		0	0	0	0	0	0	0	0	0	0	0	0	0	0	0	0	0	0
HmN_000050100	330		53.2641	52.9653	50.2212	53.6468	55.614	51.0218	78.45	113.485	82.6336	77.8159	43.3111	49.0672	246.023	32.6311	19.3978	37.2306	26.1951	71.3547
HmN_000050200	600		0.327321	0.761592	1.1093	0.641429	0.974907	0.809481	138.759	120.386	174.023	1.38557	3.56203	4.47212	438.781	524.688	356.919	82.337	51.6262	3.11469
HmN_000050300	2388		33.1433	37.1228	40.7488	34.7038	35.1199	36.847	26.1788	28.9376	33.6068	43.7101	45.6441	39.6377	29.146	36.6051	33.9949	17.1978	15.1434	13.6561
HmN_000050500	2010		4.54341	5.51302	5.8611	5.61649	5.63846	5.67845	10.6112	11.8108	13.9182	8.1342	8.83862	9.52887	28.1175	26.7867	13.9331	7.2666	5.66258	3.11469
HmN_000050600	2751		36.4444	36.5016	40.2833	40.3137	38.5657	37.7228	29.2477	34.5849	26.0394	30.2532	29.9102	30.8759	26.4176	23.8696	28.002	30.0443	29.7992	27.9541
HmN_000050800	450		30.9864	27.6712	24.1089	23.3765	27.1349	30.5804	1.96125	2.86268	5.33765	0.20527	0	1.02807	7.70714	3.51904	5.65769	5.72779	2.24114	2.90704
HmN_000050900	948		71.472	77.2438	78.4236	79.9079	74.4292	74.7147	87.8218	70.8552	73.3281	47.5498	41.5664	47.825	57.5375	64.1445	62.8433	102.23	94.529	143.217
HmN_000051000	1716		32.9038	29.8246	32.5422	31.1743	30.1676	35.6153	32.5732	32.4411	42.6507	20.7782	23.3525	21.3523	63.0217	81.3931	59.6431	19.7268	13.0976	12.8508
HmN_000051100	312		60.7433	64.4424	58.6651	61.2647	67.2592	73.9429	5.65745	8.55265	9.50995	10.3622	6.85006	8.30368	20.9689	5.07553	4.89608	3.02912	7.38837	2.99489
HmN_000051200	1110		0	0.411672	0.299812	0.346718	0	0.0729262	23.058	18.7345	27.1125	0.416087	0.481356	0.333429	51.9806	85.9786	52.6886	5.49558	1.03837	0.168362
HmN_000051400	3738		8.1699	7.67094	9.84663	9.91829	9.25223	9.93985	2.28235	2.06775	2.30571	5.36238	7.93309	5.54467	2.08761	1.94874	2.60765	3.05697	2.65946	2.59974
HmN_000051500	798		1.96885	2.57682	2.33538	0.803795	2.56555	1.52158	14.3776	12.2225	8.67574	9.7233	12.5542	17.1603	4.14858	14.2878	18.5956	12.4892	10.1104	10.7726
HmN_000051800	1986		14.685	16.5088	16.1201	18.022	17.6352	16.426	11.7023	14.9651	12.6635	14.0929	14.7297	15.4211	18.4952	19.562	16.116	10.8586	6.45645	3.85808
HmN_000051900	2055		96.0939	88.278	103.773	98.4148	99.5544	94.7348	68.3575	73.2535	60.5728	59.3334	67.4706	58.1275	52.5103	54.9689	61.9101	85.6242	79.6434	85.3016
HmN_000052100	666		14.7442	12.5217	9.3941	9.91999	8.89274	13.1267	25.8408	13.4015	24.397	13.8696	18.8531	18.1997	15.5042	25.5209	14.6357	14.1905	13.6285	13.8898
HmN_000052300	3531		15.6013	15.6266	17.1532	17.33	17.5392	17.6064	11.206	11.5702	10.6838	11.3535	14.7535	10.9795	7.92472	10.3149	12.8962	9.92752	9.34374	7.78011
HmN_000052400	4770		8.9756	7.83147	8.80466	8.76754	8.96731	8.41724	18.0706	17.7471	19.0757	17.8159	18.1462	14.3736	19.714	24.5669	21.5023	18.7684	15.8269	14.8878
HmN_000052500	408		2518.21	2481.34	2202.78	2273.46	2554.11	2532.01	511.584	743.334	1024.36	904.696	424.956	520.236	2456.07	330.427	246.038	482.861	607.367	515.985
HmN_000052600	405		1586.9	1491.88	1476.61	1511.08	1886.27	1827.03	190.314	183.121	230.6	386.591	203.168	222.292	600.417	102.182	79.028	88.0382	109.211	93.21
HmN_000052700	612		71.401	76.1592	88.3093	78.1872	82.3176	83.1966	39.1769	37.8884	31.8597	52.6758	55.2202	52.6132	41.8586	36.0529	40.6498	28.4986	33.6642	24.2763
HmN_000052900	636		14.8221	16.5251	15.6977	13.4135	15.6353	17.8188	19.89	18.808	23.3263	29.4833	40.3249	46.8453	21.8127	21.579	14.1823	10.6721	15.6306	15.1327
HmN_000053000	2451		124.198	113.913	132.519	132.708	124.996	119.226	113.366	100.95	104.224	137.747	147.146	121.104	98.9549	100.833	104.765	115.572	107.335	110.368
HmN_000053100	2997		44.462	48.0665	49.3468	50.638	48.5746	47.348	46.0374	48.5096	31.9165	30.7905	32.4469	32.5402	28.5888	28.2509	30.6549	56.6185	54.9949	46.7359
HmN_000053300	1095		0	0	0	0	0	0	0	0	0	0	0	0	0	0	0	0	0	0
HmN_000053400	3738		19.0981	18.9481	20.3343	21.3123	21.7515	20.4644	10.1132	10.5849	9.97879	11.2684	11.5066	9.30712	10.67	10.9299	12.7463	10.2282	7.67003	6.39936
HmN_000053500	5781		25.0884	24.4247	25.6861	24.9093	26.7632	25.1484	22.1875	19.9118	19.5524	11.4086	11.8303	11.94	27.3106	34.2042	26.0214	15.2335	9.39553	9.82736
HmN_000053600	717		90.9378	91.2955	91.3435	101.984	91.678	105.899	28.3109	30.0299	25.4205	36.9743	36.1419	44.2631	39.6863	43.583	41.7986	30.0769	26.7249	30.2347
HmN_000053700	2100		11.316	13.0015	10.3007	10.9959	11.107	10.7545	14.149	14.5471	11.7069	15.7471	16.3472	13.9231	11.5232	10.1549	11.5348	13.4194	7.75251	12.5033
HmN_000053800	528		111.773	110.344	128.074	113.465	118.54	115.903	32.0375	28.0575	32.1115	87.4729	88.5448	93.5781	30.7529	32.1912	32.3756	29.4525	27.8323	43.004
HmN_000053900	474		0	0	0	0	0	0	0	0.194124	0	0	0	0	0.166293	0	1.84156	0	0	0
HmN_000054000	4263		3.29394	2.70657	3.52854	3.64123	3.3789	3.37996	3.69201	2.65489	2.78405	3.4019	2.75738	2.69137	3.36519	4.38332	5.11905	3.08357	2.43333	1.57817
HmN_000054100	309		0	0	0	0.415164	0	0.261968	0	0.297782	0.457251	0.298937	0.864571	0.299439	1.02036	0.683308	0.23541	0.556096	0.466256	0.302397
HmN_000054200	876		35.0861	38.9925	43.9922	43.5674	43.2365	48.6982	3.69414	8.29813	5.96776	18.7695	17.3832	20.2798	6.11868	5.30266	3.81977	4.41354	3.61828	5.54671
HmN_000054300	576		0.681919	2.77664	1.96439	1.22495	1.52329	0.28107	15.5776	25.2401	29.1903	1.28294	0.927612	0.321273	84.9811	34.0907	12.8813	10.143	5.00254	12.0045
HmN_000054400	1311		207.778	206.78	224.45	226.922	242.723	238.399	181.315	155.814	148.188	199.046	247.284	234.881	155.001	158.88	176.167	139.525	148.139	148.821
HmN_000054500	360		26.4585	23.4824	26.6233	27.2607	33.9187	27.4324	47.8055	62.3655	94.5862	27.4548	10.0182	19.5334	234.28	61.2899	35.3606	22.6725	28.8146	8.82496
HmN_000054600	1095		38.9198	32.7589	33.4919	33.5652	27.845	33.9317	34.9264	35.3773	28.9033	22.1016	17.0782	17.4913	34.1926	45.0244	36.8691	33.3467	37.7616	39.595
HmN_000054700	3603		19.7047	19.1825	21.7242	19.1022	21.0445	19.8158	16.0852	14.8889	12.1173	15.3824	15.6821	14.869	12.8856	13.0389	12.6384	15.5237	12.7958	13.2005
HmN_000054800	3639		24.232	25.805	25.8258	26.6513	24.8549	23.7127	17.745	18.5597	16.4626	26.8814	30.0996	21.0276	14.0577	15.84	16.6312	15.6062	13.1839	16.1769
HmN_000054900	6795		0.505794	0.470741	0.597506	0.585262	0.344338	0.321648	9.17848	10.6436	9.60652	3.65679	3.26323	3.00933	8.60731	9.07337	10.095	11.8475	9.49886	12.8576
HmN_000055000	486		96.3779	87.207	73.2688	80.3766	89.6674	83.7796	46.0047	51.3086	60.7608	82.1079	58.5426	81.8652	73.9574	43.8793	39.065	30.9371	41.799	36.7226
HmN_000055100	2745		48.0071	52.6872	50.4097	46.711	46.3481	45.384	17.4155	16.3917	19.1476	31.3289	39.9025	34.0781	14.7021	13.9223	15.6083	18.3414	16.1656	20.5944
HmN_000055200	267		8.45886	8.12936	11.2177	8.64848	9.85861	9.39846	8.81461	6.89248	7.4085	8.99497	16.5094	11.7824	17.4178	7.90795	13.8945	3.86143	5.9356	5.24948
HmN_000055300	1668		17.7201	17.4646	20.8294	19.8812	19.0247	21.4503	18.9599	12.9637	20.8378	16.5028	18.9793	17.64	7.93901	6.77225	6.54152	26.8361	24.4441	38.9336
HmN_000055400	339		0	0	0.392674	0.567636	0	0	17.3562	33.6573	27.9247	0	0	0	79.7531	21.1765	22.1015	20.0219	19.5498	19.2945
HmN_000055500	738		11.4429	14.2412	14.5202	17.296	21.4995	14.5882	9.76639	6.23406	4.21192	4.13043	6.69691	4.13737	13.4576	9.29827	10.7437	6.75227	1.95221	1.8992
HmN_000055600	3774		62.8883	62.8102	67.4224	64.7037	65.9496	64.4539	39.4043	35.1577	36.2399	57.983	63.9566	52.7358	30.7021	38.8269	48.4752	30.7561	26.1882	23.0259
HmN_000055700	2322		15.5203	15.2515	17.3132	16.3534	16.4374	17.7444	4.81444	3.01168	6.57166	2.98357	2.07095	1.67361	2.95332	2.50061	2.91343	2.9231	3.90896	8.45071
HmN_000055800	1062		12.5751	10.3267	11.4064	12.14	10.7405	11.9669	1.52357	1.213	0.532168	11.8291	11.8231	12.8945	1.33598	1.59053	1.91786	0.728109	1.22096	1.05583
HmN_000055900	1569		38.9281	39.2446	38.7302	35.3215	36.0697	35.1342	32.3438	35.9496	28.5463	32.851	24.3485	23.8836	21.4515	23.1462	26.3799	34.991	35.8117	39.9014
HmN_000056000	1779		7.50686	7.83426	8.71729	8.437	7.93243	8.28136	10.3354	19.0857	16.1225	8.61925	12.6143	9.20586	6.69043	13.1741	13.3298	19.8492	18.1407	19.2239
HmN_000056100	1833		81.9642	88.1253	91.976	93.5723	89.792	96.2279	51.6794	49.6468	45.6323	56.7935	54.509	53.7594	46.3134	44.2903	55.1218	42.1381	41.3434	36.9583
HmN_000056200	519		67.9239	69.3357	80.0238	82.0633	79.176	84.6913	70.0042	80.1361	88.749	72.2597	83.9033	91.2787	85.9611	92.3493	54.3811	58.4367	65.513	65.3545
HmN_000056300	261		0	0	0	0	0	0	761.394	1352.72	1788.6	48.1322	37.3604	47.1496	3587.5	941.646	1155.78	1095.52	1068.68	424.242
HmN_000056400	258		5.32849	6.64179	6.70742	5.96678	4.53445	5.64754	2504.02	1692.64	2022.98	114.569	142.378	148.473	3071.35	2399.9	2821.98	1860.2	2313.55	3158.51
HmN_000056500	204		0.481355	0.559994	0.652532	0	0.358422	2.38083	1131.32	1201.15	1349.88	133.123	151.91	136.522	1992.6	1794.19	1836.01	1439.53	1510.65	1215.65
HmN_000056600	1143		0	0	0.116462	0	0	0	65.2463	61.1821	78.2476	0.646519	1.40237	1.69997	198.747	254.922	139.501	44.8	24.2013	1.22626
HmN_000056700	4170		8.26545	8.79393	10.2471	9.02922	9.87181	9.55071	8.57165	8.53949	9.38549	9.92383	10.9231	9.16391	9.98047	11.4432	9.821	5.33632	5.66619	2.66653
HmN_000056800	222		467.981	451.81	426.033	447.844	394.903	408.751	146.431	168.279	107.559	92.7875	71.6016	84.1909	189.601	93.6825	80.6057	140.099	125.902	173.833
HmN_000056900	879		179.747	167.394	184.303	176.958	178.095	185.471	697.482	752.029	438.339	165.302	169.136	179.053	482.085	368.838	337.061	859.168	875.257	933.769
HmN_000057000	4095		106.829	105.34	115.075	111.385	115.757	117.696	145.98	157.313	122.624	110.192	117.103	109.609	96.2815	103.328	115.463	126.032	111.248	113.361
HmN_000057100	6594		8.72658	8.36782	7.79238	7.44151	7.45152	7.66024	19.5857	24.0572	20.6343	35.7074	31.8849	31.7683	17.4286	18.2196	20.4965	23.9092	23.029	22.6446
HmN_000057200	738		65.7304	57.5838	74.1339	73.7904	72.6227	68.5536	42.0553	44.0124	55.3293	45.3095	43.6204	38.9916	70.1717	70.9529	58.3511	30.8509	31.2354	28.3614
HmN_000057300	219		0	0	0	0.58578	0	0	0	0	0	0	0	0	0	0	0.332154	0	0	0
HmN_000057400	2697		7.86445	8.00562	10.7352	10.5835	9.86836	9.96469	32.1239	25.6563	35.8334	17.6728	19.3653	22.334	34.6038	35.1121	44.3948	20.0058	20.4064	17.1845
HmN_000057500	513		160.598	153.877	167.758	168.922	201.965	192.824	65.0883	74.2575	84.5541	121.181	130.191	138.7	102.793	72.0271	50.4796	45.8893	66.5601	55.1901
HmN_000057600	1320		299.871	312.166	309.244	328.1	305.213	313.551	344.222	324.352	294.891	412.312	424.914	369.616	298.154	293.44	304.027	229.958	213.272	250.733
HmN_000057700	3819		21.8814	23.3922	24.016	23.6652	22.8793	21.9804	15.6376	18.2632	15.9826	17.4149	15.9494	15.6028	15.2115	17.9407	19.7711	15.3656	15.0901	12.7475
HmN_000057800	966		48.1833	54.9908	56.4987	54.6476	57.9041	57.9876	20.252	31.1478	33.3481	51.923	44.8019	57.8531	30.8438	36.0647	37.7263	21.6126	25.3545	20.9903
HmN_000057900	369		0	0	0	0	0	0	0	0	0	0	0	0	0	0	0	0	0	0
HmN_000058000	5253		8.22509	8.95991	9.02141	9.15803	7.68345	8.21346	4.39629	5.29001	5.05666	9.84732	9.48485	9.82865	3.79635	3.95917	4.54203	5.26656	3.86718	4.78499
HmN_000058100	243		0	0	0	0	0.300897	0	0.605324	0	0.581443	0	0	0	0	0	0	0.353567	0	0
HmN_000058200	621		1.58126	2.39147	1.92922	0.929607	0.824197	1.30351	4.26359	2.66709	2.04769	2.23119	2.15098	1.04297	3.42709	2.38002	1.99132	4.28892	1.39201	4.21311
HmN_000058300	1056		1.39483	0.757265	2.14297	1.39705	1.10785	0.843209	20.3368	20.7382	25.5554	1.74946	2.78284	2.6286	41.3522	33.3909	34.7176	12.4482	6.95808	4.77822
HmN_000058400	318		0	0	0	0	0.229931	0.254554	4.62559	2.60419	4.88741	0.580952	0	0	13.385	11.2875	5.94743	2.16143	0.906121	0
HmN_000058500	1065		3.68813	4.50519	4.6872	6.08303	5.28647	4.94049	7.32016	6.22071	11.4094	10.408	12.2915	8.86171	6.29104	5.55116	6.42039	8.30933	6.89928	6.49259
HmN_000058600	615		0	0	0	0	0.475565	0.263246	12.9156	11.9694	13.0952	0.300395	0.434394	0.6018	40.1164	58.1929	22.3548	6.7057	0.234265	0.151936
HmN_000058700	1623		73.4506	62.1521	69.839	69.4387	70.0095	72.7186	25.1954	25.0588	26.0295	52.8731	51.768	60.6013	28.557	29.076	33.3456	19.9043	19.8844	18.8263
HmN_000058800	1926		30.9986	32.6227	38.8429	31.6718	35.7998	37.532	36.6589	38.7455	39.9076	41.006	41.1964	37.9523	43.6678	47.6879	44.7554	32.2523	30.7446	21.7834
HmN_000058900	435		203.165	198.014	204.877	201.423	209.941	206.371	127.819	242.2	267.965	280.936	104.404	139.322	627.323	134.937	65.8856	147.54	181.168	137.476
HmN_000059000	1503		36.4561	41.1959	37.5082	35.2935	33.9077	36.7309	25.3475	27.182	29.1418	35.2769	37.0601	36.4443	29.4734	29.4307	32.8136	27.3813	24.6353	21.1376
HmN_000059100	699		38.9133	37.5893	39.8016	33.4938	39.5402	35.2049	92.8017	80.5622	107.13	29.3368	21.5939	31.5041	172.531	161.151	176.495	47.1989	25.9703	9.89215
HmN_000059200	549		1.43091	0.208085	0.727412	1.75254	0.799104	1.17957	1.33965	0.335208	2.5736	0.673016	0.486616	1.8539	1.29218	2.11527	2.11998	1.56497	1.31214	3.74444
HmN_000059300	714		17.6038	15.1998	22.2793	19.0452	16.4874	16.2123	9.68265	8.37669	9.49853	15.654	11.412	11.1447	13.2476	8.28009	7.43718	5.65559	3.83388	7.32868
HmN_000059400	498		0	0.688186	0.133651	1.28801	0.44047	0.650185	0	0	0	1.11291	0	0.371593	0	0	0	0	0.578607	0
HmN_000059500	1443		53.0791	56.1298	50.3684	53.5191	54.7245	49.8703	38.4299	36.4743	40.9283	45.2575	49.0612	50.5274	43.2079	57.7971	50.7629	24.9474	19.07	19.6206
HmN_000059600	675		114.635	118.301	111.029	127.05	125.438	126.159	41.6221	38.987	53.3765	61.7178	52.8368	50.4442	63.7591	65.6887	57.8701	36.4033	35.6448	32.8081
HmN_000059700	2220		22.6471	22.8478	21.7364	24.2703	20.6509	21.2944	66.656	63.9958	71.1545	30.6656	29.0618	25.8408	119.655	176.285	118.156	42.4166	27.5167	22.5605
HmN_000059800	1473		110.396	106.716	109.123	122.276	106.823	112.547	161.773	141.864	170.355	205.751	222.627	188.32	129.178	147.785	175.657	188.574	195.716	187.008
HmN_000059900	276		0	0	0	0.232402	0	0	0	0	0	0.334679	0	0	0.571181	0	0	0.311293	1.04401	0.338553
HmN_000060000	1458		100.284	101.076	112.985	111.656	104.211	115.537	82.1223	84.0628	92.7402	122.021	129.179	127.938	96.123	83.9935	84.0172	90.5721	95.5547	97.1578
HmN_000060200	1140		164.867	155.525	136.678	142.183	145.531	141.73	160.513	167.725	188.388	422.64	392.761	444.453	174.586	146.41	165.264	148.093	129.16	150.735
HmN_000060300	303		246.625	242.428	230.208	224.394	282.337	272.231	3.88367	2.73311	0.932612	4.57284	3.08592	4.8859	2.86156	3.13578	3.60107	2.83554	1.42647	0.925156
HmN_000060400	1116		28.8606	27.4337	32.9213	35.5775	31.4486	34.7438	15.5529	22.3441	16.2054	21.3547	19.5098	19.8153	20.4121	22.7035	24.9642	13.3956	14.8462	8.2891
HmN_000060500	1419		19.5147	23.2664	23.1711	22.737	21.9509	21.6204	13.0612	13.8119	15.4334	13.6702	13.0846	15.1277	17.5533	19.0459	18.3008	10.4747	11.4731	10.3384
HmN_000060600	1284		14.4541	12.1001	10.16	11.3899	9.5099	9.39351	24.7448	26.9451	21.5677	30.7905	21.1183	29.6172	28.2388	26.2283	25.4936	24.6241	17.7286	19.1393
HmN_000060700	2919		37.8118	37.6491	32.0136	29.1379	33.5657	31.5584	273.376	298.74	267.867	312.525	278.547	265.725	236.928	234.868	236.068	305.109	326.497	284.356
HmN_000060800	240		0	0	0	0.534524	0	0.674567	0.612891	1.91697	2.35484	0.384881	0	0	3.61272	6.15831	5.15254	0	0	0.389336
HmN_000060900	897		74.0031	68.7726	67.1518	71.6512	68.8793	68.0433	41.652	45.5457	50.5622	53.9605	41.8449	56.2174	57.9969	64.6138	62.686	41.9527	32.9264	48.0225
HmN_000061000	1896		17.868	15.4849	18.465	16.5093	16.6984	19.0416	6.20649	7.42523	5.66355	10.7669	9.72232	9.61379	2.20339	1.33634	4.02842	3.30798	3.87539	9.0188
HmN_000061100	330		0	0.692357	0.403383	0	0	0	0	0	0.856307	0	0.809552	1.12154	0	0.319912	0	0	0	0
HmN_000061200	768		31.1978	33.6172	38.1323	31.4868	38.1775	42.6875	49.2228	68.1723	47.2809	56.5294	52.1782	66.865	50.7013	49.7614	49.0628	53.3624	54.5902	48.9104
HmN_000061300	3132		0.84652	0.948343	1.25381	1.22879	0.747056	1.05966	23.1067	30.319	43.127	27.6937	24.2245	30.2218	29.7222	27.0332	30.0303	33.7961	35.1903	36.9049
HmN_000061400	735		679.091	667.87	641.042	630.869	653.387	658.157	335.014	318.859	357.936	359.557	308.406	361.798	277.114	320.591	304.624	297.377	337.935	382.408
HmN_000061500	519		3.40565	3.74193	5.12973	3.95486	3.80383	6.23877	9.35279	10.2829	10.6172	7.65312	13.126	7.30943	16.7062	12.6116	8.40945	12.4157	6.93994	4.86108
HmN_000061600	3606		8.63235	9.69415	8.78583	9.39197	8.77984	9.38333	15.8679	16.484	15.1243	16.7016	12.0759	13.4197	18.4489	24.1531	22.2905	13.8429	11.3469	6.815
HmN_000061700	1914		27.3965	27.3362	30.4276	31.7028	30.0265	27.744	19.5971	20.4317	17.9382	19.5457	23.4491	19.2885	21.9502	19.5257	22.765	15.6212	16.4096	16.2569
HmN_000061800	207		241.933	235.1	113.181	111.243	74.8842	78.6017	2.84239	1.33355	5.46051	6.24734	6.45295	5.81085	3.80788	3.06003	3.16268	3.73551	4.17603	4.06264
HmN_000061900	2736		57.4248	58.9149	57.0464	53.1476	52.1394	51.0067	22.1501	23.34	25.5625	28.4272	36.5186	22.1171	17.1705	26.4699	28.5809	20.8198	17.6932	21.2769
HmN_000062000	990		67.2496	53.1961	63.2639	68.4838	67.0618	66.3938	32.6875	36.62	32.8251	53.2768	57.0734	58.3198	36.7841	39.4559	41.1468	19.0058	17.9	23.2186
HmN_000062100	6753		3.92611	3.8401	4.63237	4.8157	4.22272	4.71088	17.883	17.3183	24.5841	2.24329	2.69012	2.46628	37.7832	33.5176	37.6581	8.79143	6.16573	1.13463
HmN_000062200	1266		46.461	46.0204	47.3688	45.8525	51.9797	43.9268	38.342	37.2129	43.0791	26.3397	27.0107	27.4803	53.0468	64.2099	47.2304	36.3755	36.3028	33.3611
HmN_000062300	969		72.2539	69.3214	79.1967	74.6679	82.6257	86.6286	89.8654	96.9525	107.463	90.8462	89.74	102.744	153.579	186.411	147.06	72.7943	57.5401	62.6795
HmN_000062400	4548		8.35576	8.5654	9.30761	10.0417	8.5851	8.84591	2.361	2.95386	2.20572	6.62117	6.54958	5.73714	1.64648	2.0195	1.80735	2.66365	3.32623	4.39673
HmN_000062500	435		119.416	113.451	127.761	120.471	129.764	128.214	21.9795	30.037	27.6085	19.9607	11.9758	24.6738	57.9848	45.6261	24.9161	17.7759	16.5601	15.466
HmN_000062600	1482		28.4253	30.217	27.7101	28.3925	25.7048	27.365	34.5402	33.4655	32.0335	31.3514	32.6279	34.0263	23.7214	29.634	29.99	44.9295	47.0522	43.3156
HmN_000062700	1587		6.49692	6.8385	6.83616	6.34558	5.16019	6.22285	0.463434	0.985664	0.53418	2.27	2.35673	1.80739	0.894023	0.665224	0.733376	0.920344	0.81705	1.23646
HmN_000062800	1527		73.6312	77.2814	79.0243	73.5102	76.3741	77.8734	67.719	74.9013	83.1829	64.0611	62.7204	56.1704	77.6874	87.5265	80.9353	65.0425	60.6673	80.3456
HmN_000062900	1188		159.445	169.916	168.412	167.538	163.408	165.03	103.015	109.054	103.827	169.814	164.384	157.95	83.8656	95.4405	119.154	74.7071	70.7026	75.429
HmN_000063000	1089		37.6915	35.1424	37.099	37.5786	33.4369	35.2336	57.6759	57.4564	75.6405	66.0765	67.8307	66.5274	55.8058	61.9467	67.064	75.4238	75.0133	69.8446
HmN_000063100	1017		1202.59	1234.5	1152.82	1175.76	1088.65	1093.71	299.973	283.282	315.23	451.412	471.654	467.182	317.617	301.35	365.854	178.254	184.873	217.385
HmN_000063200	3816		15.311	16.5251	18.1221	18.1368	16.7466	16.3551	14.4164	12.4181	11.0707	18.2274	17.6071	14.5482	14.6451	18.7018	15.898	10.1092	9.62753	7.76224
HmN_000063300	807		292.034	310.866	280.749	284.788	287.308	275.444	368.737	376.268	422.997	764.84	779.443	932.834	404.957	402.007	494.319	192.488	230.124	194.871
HmN_000063350	1083		72.2645	68.6699	81.984	78.4166	76.8313	76.4634	40.4746	34.7498	38.6168	61.2398	58.3394	73.7309	39.4479	42.7938	49.3676	29.0356	34.1891	29.2488
HmN_000063400	2427		52.1125	50.9297	53.3947	56.9542	51.9991	50.8302	70.0014	68.6224	64.4453	68.622	70.6132	69.4617	68.3328	95.7404	87.2181	63.65	51.4674	61.7548
HmN_000063500	2268		0	0	0.08804	0.0565634	0.128956	0	15.7601	13.3884	19.0007	0.0407281	0.530064	0.285576	38.3341	58.9299	38.4235	4.24281	1.01639	0.0411996
HmN_000063600	4992		13.7695	12.5178	13.7463	13.8642	14.1783	14.7562	28.4346	24.8838	31.1055	14.6551	15.3056	13.4564	53.2276	73.9759	48.5236	19.018	12.1504	11.6801
HmN_000063700	2988		15.2487	12.502	17.9761	18.2039	19.0136	17.9343	8.36879	9.17683	7.56576	9.42881	10.3714	10.2188	7.88758	11.1295	11.4663	4.7444	2.55551	4.15918
HmN_000063800	1128		4.26562	4.75995	3.89436	3.12753	4.34301	4.66456	19.9516	16.7225	23.1727	4.17637	4.49991	4.92163	38.5031	53.4407	51.5899	7.4644	3.83173	0.99405
HmN_000063900	1272		31.3426	34.3974	32.4942	34.3911	33.9148	35.0011	16.4209	12.0805	12.885	18.4452	20.8975	23.2772	17.9087	29.3806	26.0772	7.22728	3.51122	2.64455
HmN_000064000	1329		48.8396	42.0337	44.7728	51.739	50.5059	49.2754	35.0856	41.3339	38.6981	50.1127	49.6513	49.0134	48.8121	47.2647	45.922	27.6692	31.9801	31.7797
HmN_000064100	1254		85.7456	83.8116	86.2497	85.6773	94.8086	93.0838	121.288	118.137	140.164	122.057	125.268	142.553	177.823	202.05	198.618	86.6705	77.7811	85.3932
HmN_000064200	891		112.524	103.854	108.839	113.744	113.001	103.842	30.2112	32.737	35.6795	55.6716	57.1184	57.7383	41.3135	41.7071	45.3921	28.5425	26.5185	24.1205
HmN_000064300	1542		50.0534	49.4146	50.933	56.0314	49.3144	52.7055	15.5488	17.7823	17.9591	29.2929	32.138	26.1619	16.1531	17.7321	17.2655	10.7535	9.53013	7.87762
HmN_000064400	582		160.961	169.003	157.933	169.284	202.017	185.263	98.8208	90.1175	92.0089	137.287	204.954	204.131	91.0121	139.129	113.987	95.5123	85.4042	118.166
HmN_000064500	4689		9.40289	9.96453	11.4124	11.8327	11.2273	10.1509	1.50576	1.80536	2.35032	7.74194	8.97345	6.49206	2.303	2.65673	2.65277	1.79566	1.65919	1.83334
HmN_000064600	3330		30.8744	32.4878	34.7782	33.7858	30.7403	31.5284	19.5683	22.4372	22.2756	24.5214	25.5118	19.4778	18.4157	26.8842	25.0118	22.7563	21.0269	22.4763
HmN_000064700	1161		10.9107	9.44611	10.5484	12.265	11.3361	8.36672	0	0	0	0.318248	0	0.159391	0	0	0.125309	0.0740024	0.124094	0
HmN_000064800	732		13.549	9.20778	10.7293	10.34	8.98993	10.395	0.401896	3.51969	2.8953	16.9095	25.1824	18.5812	3.98422	2.30757	5.06807	1.64322	0.984106	0.893559
HmN_000064900	942		0	0.242545	0.211969	0.136184	0.15524	0.515593	0.312301	0.488401	0.14999	0.196118	0	0	1.08779	0.112071	0.772205	0.820861	0.152944	0
HmN_000065000	1875		20.1106	23.3352	24.3514	22.0651	20.824	20.3342	11.0615	11.0418	11.68	15.7155	11.4697	13.6199	10.4677	10.6416	13.2681	9.30193	9.22068	9.86734
HmN_000065100	705		71.7321	71.298	81.0028	66.2355	73.5329	70.9587	51.3264	57.1666	60.7249	45.8581	38.4624	50.135	77.2577	77.2691	74.4958	55.4499	52.929	49.7025
HmN_000065200	396		137.624	150.876	132.78	136.061	150.298	154.742	45.6882	54.1399	67.0774	77.9092	97.1463	95.0969	75.4392	66.3818	59.8833	42.5245	44.0224	42.4731
HmN_000065300	2172		13.3822	13.2542	13.0542	13.2893	13.6676	12.336	40.9723	50.2861	45.2755	56.0097	53.1353	51.7587	32.6615	39.3218	38.4138	64.8727	54.7903	60.8311
HmN_000065400	729		207.303	207.009	197.483	209.322	211.23	205.868	104.721	96.811	91.6742	112.011	117.635	108.646	108.882	107.743	87.6094	71.5384	82.017	96.3888
HmN_000065500	1296		538.186	535.054	506.941	503.838	494.111	501.99	542.522	526.173	459.958	474.045	485.347	499.473	608.75	539.586	493.42	656.707	689.35	393.23
HmN_000065600	1284		37.3972	37.7237	38.4109	41.7628	39.5771	39.2762	33.7949	36.1179	32.7918	25.0352	26.3199	24.1405	36.7718	34.1215	34.0481	29.9103	26.0319	23.6513
HmN_000065700	1698		30.9972	34.7157	29.7121	31.0137	31.607	29.3186	43.5737	47.3079	42.8532	48.9601	44.8401	50.0777	36.4406	29.6569	37.0563	42.756	45.988	55.8003
HmN_000065800	2040		64.5978	62.9434	67.9285	70.0226	67.0249	64.2029	64.678	58.0053	65.8664	49.31	53.4959	47.3065	83.8461	106.606	88.5737	48.6862	38.5608	33.5287
HmN_000065900	6087		92.4856	93.2191	96.2781	97.4103	96.5178	98.1563	77.1596	73.255	62.7417	78.395	84.9472	79.8189	61.5744	69.5482	72.2756	69.459	64.9714	62.3092
HmN_000066000	1377		235.044	248.721	263.864	253.031	247.072	245.666	306.259	260.742	281.35	279.462	298.291	329.32	295.429	358.19	348.97	275.034	264.186	283.851
HmN_000066100	1224		79.2631	87.7325	93.4751	90.5546	89.7847	80.4851	142.167	135.541	131.941	117.275	111.641	105.378	171.298	204.76	167.888	111.397	104.641	114.892
HmN_000066200	1383		62.6952	59.8866	68.9645	69.8012	71.109	66.0812	40.4162	36.6595	41.9888	45.0169	44.7186	37.6663	42.4037	39.2361	40.6575	45.5987	40.003	44.7272
HmN_000066300	1167		45.3538	42.9742	45.5699	49.4675	42.6679	43.7688	33.4018	32.5639	31.7208	24.7748	29.7599	23.8651	30.462	36.4569	33.7217	35.5594	27.2838	33.2287
HmN_000066400	3012		17.9635	18.0916	21.8546	20.8273	19.9788	19.3233	17.5809	14.8164	14.4011	20.0874	22.8392	18.4316	15.4139	16.789	16.9537	14.4336	13.7759	11.8817
HmN_000066500	234		0	0	0	0	0	0	0	0	0	0	0	0	0	0	0	0	0	0
HmN_000066600	654		0.300295	0.349354	0.305313	0.392311	0.335404	0.371321	33.962	37.847	49.2573	0.988685	1.63396	1.55626	71.3505	78.4519	84.3092	14.1881	14.3192	2.71464
HmN_000066700	933		4.63091	4.40793	4.63696	4.33119	4.15354	4.16453	3.46845	5.42423	6.66322	4.55422	2.57703	5.35524	7.43454	4.86555	8.65416	3.31512	5.86793	2.00302
HmN_000066800	468		0	0	0	0	0.31247	0	0	0	0	0	0	0	0	0	0	0	0	0
HmN_000066900	1521		64.6895	63.466	68.4399	70.2999	65.4746	71.1555	56.5745	54.87	35.671	39.5357	41.0125	43.9821	27.2072	24.9178	29.3167	52.8719	61.3803	56.5805
HmN_000067000	447		0	0	0.1489	0	0	0	0	0	0	0	0	0	0	0.472354	0	0	0	0
HmN_000067100	3123		10.0303	8.74258	9.12165	10.1257	9.08415	8.47583	4.14481	2.35708	3.39315	6.50711	7.5706	4.32561	2.97826	3.75229	3.16775	1.84324	1.52239	1.52593
HmN_000067200	24246		50.7546	50.9754	52.333	51.7275	49.0379	48.7939	116.791	108.793	131.192	112.658	114.041	105.296	110.448	111.58	129.265	106.303	109.341	86.4305
HmN_000067300	717		53.1383	53.5345	57.9251	48.4874	62.6143	66.0455	22.5667	21.0466	17.3411	27.4409	25.5229	28.7775	21.6571	27.9756	24.1458	17.7346	14.6685	9.38317
HmN_000067400	3348		47.0158	48.862	51.6482	51.4791	48.1557	49.565	37.6961	37.5149	37.0951	37.6328	36.2267	34.1586	46.1684	58.6506	47.4733	32.206	29.1761	27.3512
HmN_000067500	2178		5.13975	6.3466	7.02865	6.47908	6.54638	6.1696	4.38985	3.37979	2.27051	6.91301	9.81276	8.454	2.82286	1.40568	1.13555	2.36685	2.38137	3.86119
HmN_000067600	2451		37.66	39.7576	37.3389	37.5017	39.8555	40.3915	63.9747	59.879	54.4179	54.0435	56.3516	54.3986	50.1367	48.7152	56.656	72.6314	72.1835	73.8834
HmN_000067700	1650		394.095	397.621	397.09	388.434	369.579	383.988	239.629	217.489	221.955	271.012	292.006	272.533	218.698	229.953	274.435	148.402	138.485	134.328
HmN_000067900	609		40.4717	42.5816	41.0934	41.9193	51.6269	48.9144	313.752	297.65	305.318	371.002	368.047	451.238	280.216	294.351	316.289	398.547	446.414	523.36
HmN_000068000	573		240.264	257.586	248.693	245.153	258.657	276.608	727.511	600.906	778.455	843.755	928.739	1102.57	718.349	673.776	635.76	716.423	843.318	725.022
HmN_000068100	870		0.225739	0	0	0	0.252131	0	186.826	210.999	110.921	0.637044	0.614143	1.70164	139.073	67.2257	39.7989	94.1135	51.8332	123.299
HmN_000068200	4671		41.7508	45.4901	43.9732	44.2724	43.2823	42.6316	38.5133	33.9022	34.211	38.7995	36.5754	36.567	33.21	37.6087	39.0416	38.5715	36.5812	33.4474
HmN_000068300	507		147.391	148.939	145.063	144.606	166.282	152.476	21.7594	27.0418	35.3923	55.7508	25.0291	29.9297	91.2606	16.6582	8.60849	13.218	20.1759	13.6383
HmN_000068400	807		119.125	122.732	118.023	115.966	116.337	120.369	118.659	112.31	124.308	147.657	139.535	152.95	117.209	99.5534	107.896	123.925	120.686	163.724
HmN_000068500	1236		155.319	165.905	172.157	167.259	163.51	175.06	90.089	86.8035	88.4781	119.126	130.334	111.616	98.9752	100.361	106.7	89.9485	82.7605	86.5612
HmN_000068600	1584		22.1314	21.1313	25.1694	23.1627	24.2804	24.2742	11.0506	10.9209	14.9854	40.5291	48.0672	42.4081	12.1419	9.93062	12.9962	10.4684	7.54929	10.6183
HmN_000068700	354		1500.13	1561.91	1286.42	1325.44	1325.83	1383.66	51.9399	75.3793	104.571	123.162	73.9574	86.7764	258.735	41.4531	33.0831	35.92	47.2104	33.7865
HmN_000068800	4761		13.4889	15.2366	15.28	14.4561	14.1752	14.758	14.49	15.4227	17.9247	20.6822	19.8919	18.4431	17.6652	18.5376	18.3802	17.4144	12.4676	14.4253
HmN_000068900	3594		89.3986	93.5462	99.7632	97.3208	96.3921	95.8584	78.1308	71.4816	67.8541	65.1277	78.9415	82.0228	56.4306	81.3373	96.9687	85.7017	74.9229	94.3247
HmN_000069000	231		43.3594	42.5305	31.4063	39.9852	45.5801	49.7603	1.91031	3.18666	2.44659	4.39864	2.31301	2.00274	1.02368	0	0	1.85967	3.74216	3.23604
HmN_000069100	186		171.58	166.445	141.347	118.63	134.05	143.182	1.58165	0.989405	0.759627	1.98648	4.30891	3.97964	2.54268	1.13517	1.17325	0.461918	1.54917	0.502369
HmN_000069200	1401		92.7293	92.8751	93.6376	97.8854	88.2531	86.2637	31.9176	40.3262	34.3898	61.7787	57.0154	60.1655	36.9641	39.8623	35.0469	30.7853	31.1593	41.0846
HmN_000069300	1005		346.179	348.4	309.943	303.482	324.993	334.988	314.239	341.599	335.864	428.861	372.817	426.175	362.429	289.296	315.142	394.021	435.087	454.466
HmN_000069400	777		0.758273	0.294051	0.856605	0.330208	0	0.416721	0	1.06581	0	0	0	0.357246	0.202891	0.815221	0	1.3269	3.15218	1.92413
HmN_000069500	357		108.099	98.559	94.5239	96.1245	104.045	114.506	15.245	28.6096	41.9518	52.2662	24.3206	51.0581	72.6408	20.1088	14.2631	14.9211	15.3355	7.32868
HmN_000069600	1212		27.8709	23.8469	32.071	48.4247	20.21	19.5023	5.70413	1.74615	2.33153	6.63062	3.19613	3.20637	1.69092	2.35183	1.98059	1.48866	0.832106	2.0045
HmN_000069700	2274		9.80236	9.59526	11.0052	11.2828	12.5722	11.1419	11.1905	10.035	9.69276	12.958	14.1565	13.1018	10.2255	13.7419	13.4991	8.16096	7.79288	8.30036
HmN_000069800	522		22.1976	23.4168	25.1187	27.8935	21.7113	22.0204	125.396	101.533	121.532	144.22	179.381	208.628	78.219	93.2343	85.2834	133.813	165.325	147.142
HmN_000069900	462		582.589	585.041	997.077	538.273	565.478	577.85	164.287	289.786	349.557	612.01	258.189	349.078	756.155	226.224	89.9037	131.665	209.249	183.039
HmN_000070000	2109		85.1128	90.5136	92.8785	88.5044	87.4712	85.7458	41.3592	40.8372	44.2161	51.989	52.4424	49.0931	38.01	43.8002	46.1146	43.4676	37.0259	44.8817
HmN_000070100	3726		8.64423	8.6461	9.5568	8.2976	8.34009	8.40765	8.17188	8.02597	6.63603	8.23062	9.06999	6.87866	5.90221	7.16841	7.65291	9.68467	8.5454	7.22247
HmN_000070200	2808		86.0617	81.204	87.0614	87.9909	80.9559	79.6796	71.7135	72.8122	68.532	84.8383	86.2917	75.491	59.005	64.8164	76.5239	63.6727	61.4671	58.3006
HmN_000070300	3672		39.9792	41.7507	43.7377	43.5654	45.5793	45.5664	37.134	38.6652	40.9404	41.3558	42.4883	44.1719	43.9408	49.738	47.504	29.9024	28.6028	22.9021
HmN_000070400	363		3918.12	3992.38	3459.93	3463.89	4006.59	3976.94	38.9008	78.0731	73.5646	155.988	76.5395	83.8603	176.32	37.2262	37.8738	41.8933	23.02	29.0876
HmN_000070500	741		5040.61	5046.71	5095.34	5098.1	5029.06	5155.22	3147.33	3077.09	3141.38	3648.61	3981.33	3625.9	2923.05	2871.08	2854.5	2864.94	3037.4	3011.04
HmN_000070600	1104		40.2036	38.4935	36.2935	37.4167	40.4004	40.2541	29.1789	26.8376	35.0667	35.727	42.9525	41.2347	48.1934	60.0531	50.2735	22.1796	12.9196	18.2819
HmN_000070700	390		0	0	0	0	0	0.207559	0	0.94374	0	0.23685	0	0	0	0.270695	0.186517	0.2203	0	0.718775
HmN_000070800	1137		30.0548	29.6398	36.2938	38.0795	46.8804	45.2797	31.1782	39.169	34.546	62.2309	61.9126	71.4498	44.9922	43.8255	39.7296	22.216	26.7365	17.5869
HmN_000070900	1314		49.7708	47.8169	53.3377	49.596	50.6373	49.9611	46.0088	40.7554	49.6775	51.3174	49.4049	56.192	45.8301	46.6795	51.3731	39.2968	41.3361	44.5159
HmN_000071000	1443		160.803	150.339	158.67	154.423	139.953	141.645	279.203	208.133	200.529	226.159	248.176	230.323	170.264	196.803	214.041	265.014	267.079	290.489
HmN_000071100	327		0.900884	0.349354	0.407084	0.196156	0	0.247548	5487	10186.3	4759.81	7.627	53.9207	51.2151	6726.47	842.955	541.892	11232.2	13112	10930.3
HmN_000071200	438		38.3369	42.2527	29.6321	40.4188	44.2381	36.593	58.0987	69.9564	90.968	82.2485	90.2706	115.975	83.3221	99.3043	58.4591	61.9857	100.325	92.1607
HmN_000071300	1605		29.5507	31.4602	28.6138	28.1349	26.1038	27.7896	13.7471	13.7592	10.5638	23.1936	23.9688	23.2326	11.1973	10.3269	14.4577	9.90319	10.1435	10.1882
HmN_000071400	636		160.109	153.396	167.651	157.634	159.112	168.005	123.503	112.125	133.737	120.983	113.834	119.004	106.213	124.162	123.066	128.47	132.973	154.118
HmN_000071500	1290		41.0293	40.3821	42.6695	47.0381	40.8668	42.3565	12.999	18.6883	13.3624	31.8645	33.6529	37.0107	15.398	11.621	14.4356	13.2538	8.59972	12.2415
HmN_000071600	1431		5.97001	6.14703	5.5814	7.03734	4.39424	3.95972	1.54186	0.707311	1.18483	2.77566	2.61365	3.42691	0.826237	1.03284	1.06749	0.480318	1.10748	0.587677
HmN_000071700	1419		1.59163	1.44912	1.8762	1.40129	1.54584	1.65433	1.65856	1.10236	0.398282	0.260384	0.847206	0.717261	1.83309	0.669584	1.58914	0.787117	0.913783	0.724347
HmN_000071800	1905		0	0	0	0	0	0.0849848	10.9645	10.3849	11.1252	0.0484889	0.420712	0.291423	27.1846	40.0117	25.7746	3.56295	0.605032	0.0981005
HmN_000071900	1857		0	0	0	0	0.0787486	0.217954	17.5847	14.0227	21.1518	0	0.143862	0.398607	44.399	67.4245	35.1761	8.1429	1.70684	0.201272
HmN_000072000	1998		16.0712	13.9511	13.1584	16.6617	13.577	14.9094	6.77309	5.71062	6.36444	17.6606	22.1958	20.1447	5.32588	5.9179	5.31546	5.37518	4.32652	4.48964
HmN_000072100	1560		0.125893	0.7323	0.38399	0.246703	0.281223	0.311339	63.0806	75.9121	106.33	1.06582	1.37001	1.06762	100.6	145.093	182.554	9.30766	6.46482	2.09643
HmN_000072200	741		141.928	142.606	124.494	134.085	127.093	136.552	164.165	169.501	191.438	119.921	95.1798	126.615	159.454	177.804	143.913	171.138	171.099	222.82
HmN_000072300	1854		231.614	223.856	215.83	216.335	201.804	201.497	229.765	203.683	209.802	216.928	228.319	210.556	171.719	185.632	191.898	242.133	240.977	273.065
HmN_000072400	4248		9.77803	10.9452	10.7797	9.42212	10.1209	9.12762	71.9541	71.4587	88.1404	65.2775	56.8516	56.152	59.8038	69.5855	74.3513	110.652	104.663	122.806
HmN_000072500	834		10.95	10.4103	9.49692	11.1519	9.81921	9.41482	8.99495	13.5705	16.7719	19.0502	20.3407	23.409	10.4908	16.0762	14.3913	12.0531	13.6472	12.3243
HmN_000072600	1848		2.07233	1.54544	1.36862	1.63134	0.870453	1.09508	133.562	117.508	57.4184	0.199938	0.722815	0.200274	29.1748	22.2225	24.4834	213.583	258.911	272.131
HmN_000072700	1122		204.62	213.816	208.336	201.861	201.498	210.378	121.923	119.898	121.268	129.089	113.575	124.523	95.1918	105.101	107.816	124.74	125.839	134.331
HmN_000072750	279		2.81567	0.818917	1.90848	3.67844	2.09658	1.45068	1.58165	3.62782	6.58344	12.581	2.39384	9.61747	8.47559	0.756782	1.04289	0.615891	5.16391	3.01422
HmN_000072800	1008		45.9808	54.0595	52.6919	54.0251	51.3567	47.4606	78.5084	69.65	79.476	62.7722	61.3549	58.9307	83.5149	89.3375	81.4736	76.1148	70.6073	99.7443
HmN_000073000	2973		86.504	86.1499	86.013	84.8766	77.2007	79.4778	152.289	155.617	129.6	107.782	114.751	86.9247	84.6559	94.3144	111.229	161.719	151.778	134.174
HmN_000073100	4332		27.8586	29.1399	27.2717	26.8891	25.2841	25.8802	24.9231	24.2144	26.9405	24.0311	25.4387	21.8501	18.5412	18.0582	19.9653	31.8321	28.8013	32.2038
HmN_000073200	759		92.5038	105.208	101.021	102.257	109.533	111.877	92.4424	92.8633	90.6568	99.1867	98.2022	108.984	97.8278	95.8346	95.168	92.0295	96.8081	111.169
HmN_000073300	312		0	0	0.213328	0.411172	0	0.518898	14.6151	12.6815	19.4728	0	0.856257	0	59.6225	15.565	11.8905	4.68137	5.0795	0.299489
HmN_000073400	696		51.0734	54.6574	58.7166	54.8348	57.0447	58.7339	36.5621	45.8751	55.623	29.7287	35.3132	36.6916	84.3723	95.5601	79.9532	27.5279	27.9452	26.0453
HmN_000073500	3021		29.1241	27.7562	31.131	28.0054	26.5268	30.6804	31.6001	28.3872	29.3712	26.2957	30.8185	29.3415	22.1258	23.0292	23.1155	38.0525	34.7664	51.994
HmN_000073600	714		66.1519	57.7594	61.338	65.6701	78.3408	76.98	31.3141	23.9702	36.0153	47.4794	47.8929	54.4275	38.0868	38.5911	38.6122	26.834	25.0211	23.8182
HmN_000073700	2571		27.8051	28.7041	29.3053	29.3146	27.2735	29.9423	20.1961	15.9263	21.5975	21.4851	25.7697	20.5495	24.6188	26.403	29.0571	18.1792	13.9534	15.5916
HmN_000073800	1239		18.7833	16.7809	16.4918	18.5854	18.7664	19.208	4.03647	6.83241	6.61409	10.2883	10.781	12.2473	6.10735	6.47571	5.98842	4.64603	3.72102	4.52497
HmN_000073900	438		295.934	296.291	308.326	292.597	326.193	333.033	653.862	586.961	830.002	929.83	705.392	1072.72	775.633	667.894	326.175	715.777	1071.34	900.914
HmN_000074000	4563		16.6781	15.4722	17.3288	17.4028	16.8093	16.3918	11.5728	11.6959	13.8411	13.0773	14.3149	11.7205	13.6986	18.3008	15.9895	9.97938	9.09338	7.33109
HmN_000074100	648		14.2445	16.9243	9.34691	11.7793	9.36543	13.1166	169.793	271.074	325.753	388.587	184.492	255.448	543.125	110.296	86.2124	173.955	216.11	193.947
HmN_000074200	924		0.106273	0.123635	0	0	0.158264	0	0.477577	0	0.611648	0.199938	0.289126	0.400548	0	0.228509	0.393624	0.464918	0.779617	0.101126
HmN_000074300	858		9.49918	9.58648	10.1622	6.72827	9.80021	7.17022	0	0	0	4.30636	4.35913	6.25472	0.183737	0	0.423903	0	0	0
HmN_000074500	4215		15.0964	15.8823	14.0222	16.3743	13.7042	14.5572	8.06137	8.1427	7.84389	11.33	12.8664	9.48316	8.78928	9.21712	8.52536	7.50116	6.87039	5.49782
HmN_000074600	1170		29.8786	31.5377	32.9378	30.2075	32.8719	32.5868	57.0774	54.501	49.6329	33.3958	30.4828	31.8703	39.9505	42.7698	40.9716	80.0422	81.8877	93.5206
HmN_000074700	4170		7.67674	7.39676	9.40115	8.49085	8.41647	7.45421	11.6052	11.8052	9.14832	12.4491	15.4718	13.4463	10.4908	11.0634	12.2981	11.2289	11.0905	8.06682
HmN_000074800	873		67.2639	62.9426	63.4323	70.2412	71.0242	60.7342	52.7381	45.7438	57.7787	36.1867	37.946	39.8511	96.7907	117.301	82.1573	29.3279	14.1928	16.8043
HmN_000074900	888		75.306	76.4165	64.9842	67.0322	63.896	63.6281	43.8962	43.6241	50.7564	59.8126	66.1864	68.4572	43.4947	40.6591	45.6274	46.5383	44.7795	52.0869
HmN_000075000	408		0.722032	0.839992	1.79446	2.04377	2.68816	1.19041	10.8157	17.14	10.7353	22.1872	24.227	24.2656	5.02304	5.69256	5.52694	11.7925	13.7717	19.0088
HmN_000075100	1203		21.631	20.9865	17.262	19.0882	18.9633	16.0147	279.637	216.231	248.874	280.953	287.583	296.808	218.516	221.146	220.946	261.179	295.691	396.366
HmN_000075200	699		44.3921	45.5975	42.9439	40.4678	46.1303	47.4803	10.5217	11.4525	12.5322	16.3863	15.4788	18.2671	13.7574	12.5356	11.135	6.63735	7.62619	5.34711
HmN_000075300	906		42.5951	42.2406	37.6135	38.3724	37.8503	40.206	46.2712	49.8667	53.8027	55.5656	59.5638	78.8417	65.4248	71.4295	69.209	35.9409	39.7553	37.6444
HmN_000075400	6585		39.6364	40.2829	43.0582	44.7101	41.2837	42.2872	19.1881	19.423	18.474	27.3397	29.7377	26.7112	16.3152	21.1944	21.8059	16.1135	13.4118	14.942
HmN_000075500	1401		85.2297	79.747	84.8487	83.0515	85.5393	79.3303	51.5511	45.3177	51.1309	70.6137	68.2659	68.3548	53.4489	70.0793	64.9016	35.63	30.7479	32.4808
HmN_000075600	435		0.677216	0.787854	0.765037	3.39146	4.0341	0.558263	0	0.211528	7.47054	1.06174	0.614143	5.95574	0	0.485384	1.00333	0	0	0
HmN_000075700	666		1.62186	19.0398	0.399749	8.95689	7.68508	97.478	0.441723	0.13816	0.424296	1.24826	0.601694	0	0.118353	1.10961	0.109222	0	0	0.561205
HmN_000075800	990		0	0	0	0.129582	0.0738566	0.245297	0	0	0	0	0	0	0.159238	0	0.146953	0	0	0
HmN_000075900	1173		0	0	0	0	0.124668	0	84.1432	72.4037	90.7006	0.314992	0.79713	0.552163	143.266	157.052	161.855	38.4538	34.8822	5.17787
HmN_000076000	2058		59.8817	61.7822	66.7846	61.6183	62.0331	63.3267	38.2387	45.7838	48.3327	78.5022	78.7307	64.8766	38.2625	35.8059	37.0424	31.937	24.7823	29.8302
HmN_000076100	219		13.0032	10.4328	12.4607	12.5943	16.0259	14.4154	17.4632	21.0079	30.9678	32.0558	42.6956	33.3772	15.8366	19.7645	22.5865	14.5156	10.5259	12.8001
HmN_000076200	2034		0	0	0	0.0630707	0.0359479	0	70.5096	59.1717	76.6887	0.181655	1.51045	1.00078	183.494	215.087	137.294	35.7353	19.2664	1.19442
HmN_000076300	723		0	0	33.3251	9.93638	0	0	0	0	0	0.127761	0	0	0	0	6.33849	0	0	0
HmN_000076400	1515		56.39	54.895	61.8574	61.5602	62.9829	57.8658	101.655	102.522	92.0488	76.336	80.7629	72.4334	106.086	119.369	109.233	108.941	99.5674	109.538
HmN_000076500	2526		6.84187	7.68828	6.06033	7.51635	6.65762	6.24896	8.96772	9.98101	4.81037	5.92406	6.08126	4.39557	4.6495	4.054	2.96611	7.75496	5.87472	9.2109
HmN_000076600	2016		47.9779	54.2295	57.7432	55.8705	51.5743	48.3841	45.675	48.8828	42.9619	38.8546	39.8873	40.0674	45.5109	64.7251	61.9892	43.5124	38.1622	37.126
HmN_000076700	2571		16.8053	17.2847	17.1897	17.6636	18.0591	19.6467	177.359	161.303	137.279	65.7127	77.6207	57.9056	102.767	200.959	206.285	174.273	144.465	184.81
HmN_000076800	2850		38.7273	39.8834	39.7481	41.6366	37.9957	39.9344	21.7286	22.245	22.6561	22.4608	22.9189	22.4986	20.7706	26.0409	23.0476	22.2781	20.2208	20.7209
HmN_000076900	1872		51.4587	52.7256	50.8075	53.5894	53.4715	48.8629	22.6298	23.9376	23.473	37.2051	35.8201	40.3321	21.4321	20.8097	28.8324	20.1023	21.3185	17.62
HmN_000077000	879		0	0	0	0	0	0	0	0	0	0	0	0	0	0	0	0	0	0
HmN_000077100	2457		0	0	0	0.0783185	0	0	3.71177	4.08205	2.1852	0	0	0	3.56099	5.0272	5.15143	3.63669	4.86694	2.20576
HmN_000077200	1410		222.439	234.392	230.641	225.182	220.754	213.68	50.3875	54.752	54.5121	67.0839	56.1778	50.7256	53.4431	50.3147	43.7998	48.5034	53.1334	51.6243
HmN_000077300	1482		150.873	151.239	168.012	168.451	164.195	163.262	88.5342	73.8228	95.2425	207.742	237.679	222.014	72.1215	99.7298	102.339	64.2927	54.635	68.1575
HmN_000077400	372		0	0	0	0.344854	0	0	23.7248	23.9931	41.7795	0	1.4363	0.99491	172.055	87.9759	25.4205	15.7052	5.42211	0
HmN_000077500	1524		13.2733	15.5167	14.1065	13.4262	15.8327	13.1195	61.4821	74.2638	53.3085	28.7297	32.2546	36.8528	51.4625	49.3912	50.3082	58.4054	60.5032	72.2265
HmN_000077600	1506		1.17366	0.91027	1.32586	1.32034	1.26233	1.23626	29.1062	28.1054	21.1092	0.490685	0.354784	0.860142	34.2299	28.0401	29.657	22.0782	17.6026	25.1285
HmN_000077700	777		4576.68	4617.78	4475.33	4546.55	4807.44	4870.01	1211.77	1208.86	1366.72	1807.72	1840.84	1907.1	1400.86	1143.21	1200.38	969.854	916.543	656.851
HmN_000077800	1581		44.2846	46.0279	45.9719	43.9385	43.9818	44.0325	37.1224	34.5128	40.0368	44.17	36.7525	37.9236	42.9762	49.4134	49.3226	34.6167	40.5519	37.2344
HmN_000077900	762		0.902066	1.04944	0.611427	0.168354	0.383822	0.318693	0.193037	0.120754	0.185421	0.606111	0.701187	0.728557	0.413769	0	0.190923	0	0	0.367877
HmN_000078000	639		90.2054	92.6068	88.2235	90.6432	96.2321	98.8098	31.9969	23.9037	27.639	48.7154	48.9152	51.4037	31.3318	39.4859	34.7202	23.3952	21.6448	20.3259
HmN_000078100	1200		0	0	0	0	0.121863	0	29.5413	22.697	40.0324	0.153952	0.890508	0.69395	67.5907	97.6533	67.4679	15.1786	5.40274	0
HmN_000078200	1917		20.4384	19.6059	22.9499	21.0464	16.1722	18.833	5.29446	4.27194	3.02187	11.7572	12.5424	10.6186	2.96049	3.52454	2.92181	3.13729	2.40498	5.65421
HmN_000078300	672		86.3602	82.9592	81.0188	77.6014	88.1334	84.6823	43.9968	41.2149	38.056	62.2682	69.3721	62.0975	47.5049	63.4683	54.6645	21.8628	21.0107	30.7298
HmN_000078400	285		0	0	0	0	0.256555	0	0	0	0	0	0	0	0	0	0	0	0	0
HmN_000078500	2241		69.9775	69.5323	72.4092	72.014	69.8553	69.028	55.8576	52.2689	60.0848	58.8605	62.8243	59.2897	88.8122	128.607	95.4309	38.1853	32.2734	16.6784
HmN_000078600	870		18.9621	20.3529	22.3391	23.5191	21.8514	22.0514	9.80625	9.94182	9.90659	14.7582	15.6607	14.9957	9.42252	8.85826	12.9597	7.40662	6.62405	4.40353
HmN_000078700	3297		14.5046	17.7751	17.7246	16.4005	16.8103	17.4319	12.0905	8.34467	7.9709	9.24554	8.18392	8.0824	6.23986	4.48285	4.98624	9.90245	10.0506	18.7902
HmN_000078800	603		104.059	89.6103	76.2715	79.4606	84.2737	91.9559	50.4949	65.6158	76.1517	58.9768	46.2975	67.5153	136.208	61.1017	31.9677	42.0323	36.5559	20.2997
HmN_000078900	423		309.911	312.199	316.427	304.489	346.23	331.83	88.3258	115.29	111.897	240.864	130.418	171.71	213.735	93.0922	51.2459	49.5596	57.2205	51.6906
HmN_000079000	1515		4.0186	3.31783	3.51463	3.64111	2.70271	3.04557	5.92259	8.07786	6.80806	10.9748	8.19972	8.06173	6.19138	4.66882	5.85775	8.73346	6.18136	10.9785
HmN_000079100	2652		24.8823	24.5536	25.8754	24.9848	26.6335	25.3344	30.284	26.508	20.192	15.9874	20.4998	12.1764	18.1008	20.9391	29.3216	33.0449	26.7285	28.6805
HmN_000079200	483		0.40661	0.473039	0	0.265602	0	0.167594	0	0	0	0.191245	0	0	0	0.218574	0	0	0	0
HmN_000079300	354		0	0	0	0	0.413096	0.228667	1.66208	1.55957	3.19301	0	0	0	3.11729	5.36802	5.13713	0.242703	0.406986	0
HmN_000079400	237		0	0	0	0	0.61703	0	1.2413	1.94124	1.19233	0	0	0	3.99104	3.56358	1.84156	0	0.607904	0
HmN_000079500	441		45.6468	53.1042	42.561	38.8348	45.2636	43.5027	6.00383	11.6844	12.8155	16.3378	6.66366	11.12	18.4099	4.30902	5.77315	2.5327	2.28688	2.75449
HmN_000079600	2127		7.89449	9.07681	11.3277	9.19773	9.28156	9.0196	24.2736	20.2026	21.0574	6.42735	6.78243	8.22169	32.426	28.5394	35.3962	10.1388	7.78957	2.41619
HmN_000079700	921		31.8792	28.0326	27.6061	32.942	30.5651	26.5432	23.1581	17.5837	18.716	11.9351	13.7782	13.3616	28.7563	36.7951	27.0116	17.258	16.1124	17.3489
HmN_000079800	1596		1.47664	1.14525	2.21027	2.04968	2.10741	1.11583	82.9476	69.6452	100.302	0.289384	1.17172	1.5653	219.43	250.963	161.846	44.7349	14.624	1.52222
HmN_000079900	2760		1.74334	2.15233	2.91795	2.41698	2.0134	2.90357	3.35758	2.70043	2.15008	3.38026	3.24261	1.87735	2.88447	3.06003	2.47743	1.86776	1.56601	2.70843
HmN_000080000	2646		282.342	279.769	328.716	321.005	312.285	316.572	130.694	132.11	134.883	182.264	196.679	172.185	141.172	137.37	164.067	104.847	102.147	96.3011
HmN_000080100	1092		96.4878	98.8606	88.1957	91.104	94.9463	98.6647	26.2668	27.4696	30.9235	44.4939	43.1798	43.5519	29.0173	22.0423	21.0498	31.3927	34.4351	31.917
HmN_000080200	3453		72.4316	70.9651	75.6948	76.9603	79.9788	74.5951	80.9804	81.0624	71.075	116.849	91.4105	88.4537	61.9536	63.3488	72.1097	97.8352	81.4454	98.9611
HmN_000080300	2580		9.62933	11.1582	11.0156	10.9142	11.3645	11.3265	35.4051	29.2806	20.9198	0.286423	0.362416	0.537946	34.7371	41.2055	26.9257	26.3412	14.5748	21.332
HmN_000080400	561		564.498	565.9	509.805	517.945	579.47	576.593	264.821	352.969	316.33	542.209	372.394	360.376	481.509	195.523	130.313	207.824	266.574	258.003
HmN_000080500	633		105.643	113.156	107.776	102.041	120.362	117.778	37.1801	45.9347	56.0252	75.0062	73.0132	83.1717	76.9552	39.0263	34.3598	26.4673	34.5958	39.1182
HmN_000080600	3516		14.439	15.4333	16.1474	15.2877	14.8482	14.205	4.81109	4.63214	4.98295	18.469	21.123	15.2632	3.83354	5.31459	6.37214	4.0808	3.36007	2.9765
HmN_000080700	1008		4.5786	5.09995	3.76371	5.72704	3.48181	4.65773	9.77707	16.6138	10.3725	66.621	68.7758	74.3518	12.4334	9.94966	13.6391	1.44899	2.71566	1.01969
HmN_000080800	1161		0.253737	0.393588	0	0.110496	0	0.139445	0.126696	0	0.121697	0	0	0	0	0	0	0	0.248188	0
HmN_000080900	1245		87.5486	86.4362	95.0526	96.137	97.9606	87.1248	34.9717	33.48	38.5854	55.4228	63.1939	66.4408	35.0747	36.1231	40.6652	24.9124	28.236	26.4936
HmN_000081000	270		167.298	190.398	191.786	183.639	210.147	190.378	15.2542	20.4477	15.1757	35.9222	11.8734	16.7919	46.7099	7.82008	11.046	11.1374	12.8065	12.8048
HmN_000081100	768		54.3404	52.3595	55.9852	52.4502	58.4564	59.657	33.709	35.5838	36.9784	20.8076	30.6112	30.4808	64.7621	98.8354	84.3917	29.3102	11.4433	16.0601
HmN_000081200	1278		4.37965	4.46944	4.89552	4.56729	5.14916	5.25719	0.805678	0.359995	0.221112	0.578225	0.940677	0.796395	0.431738	0.908671	0.569184	0.605048	0.3382	0.658033
HmN_000081300	5811		17.5236	17.6342	17.6733	17.5728	18.2323	17.6634	26.1736	28.7397	24.4602	22.461	24.5269	20.1581	18.5969	22.9818	24.3098	35.8541	37.4129	38.5276
HmN_000081400	1137		30.0548	30.6446	33.0742	31.874	29.0672	30.4	24.3216	21.9314	24.3562	36.9648	36.8891	34.4229	27.3835	25.5339	25.9106	19.6468	23.5687	21.696
HmN_000081500	1182		47.0213	43.0087	42.7392	46.2892	40.7655	44.0352	333.014	321.818	203.449	106.126	92.667	100.668	114.967	125.221	142.591	796.221	771.316	568.075
HmN_000081600	2649		125.739	124.46	131.458	123.685	128.212	123.271	90.8439	81.4203	84.5397	101.194	111.187	112.751	76.5913	96.086	111.323	66.1647	64.7214	70.301
HmN_000081900	1731		0	0	0	0.0741108	0	0.140291	0	0	0	0	0	0	0.182144	0	0	0	0	0
HmN_000082000	432		0	0	0	0	0.169255	0	0	0	0	0	0	0	0.729843	0	0	0	0	0.216298
HmN_000082100	621		279.093	279.067	282.417	284.46	298.713	301.242	121.986	105.646	116.491	197.535	203.483	223.494	123.248	156.062	139.861	97.9535	81.8967	85.7668
HmN_000082200	846		0.116071	0	0.078674	0.303276	0.172856	0.669783	27.993	30.019	38.9134	0.764302	0.789457	1.0937	82.4567	82.8596	57.0928	13.2023	5.61988	0.6627
HmN_000082300	1611		50.5915	49.3546	52.3872	51.8	47.6561	47.7347	50.4922	54.5463	48.5001	56.0765	50.1636	50.8294	42.6652	42.5954	45.4692	58.2378	55.7154	65.5999
HmN_000082400	225		0	0	0	0	0	0	0	0	0	0	0	0	0	0	0	0	0	0
HmN_000082500	786		1079.41	1035.42	1049.1	1054.03	1203.47	1239.14	963.97	1266.67	1106.6	752.486	699.32	878.886	1029.01	950.274	1119.35	1114.62	1044.44	1265.49
HmN_000082600	663		518.826	537.25	521.021	522.624	581.195	574.206	1291.01	1088.08	1178.06	460.185	447.873	583.63	840.303	880.237	871.035	1878.25	1928.36	2147.59
HmN_000082700	12264		3.6031	3.87503	3.86954	3.93832	3.49374	3.38604	5.21737	5.01189	7.13135	2.11647	1.74268	2.02195	6.49146	7.05873	9.50791	2.66213	1.98535	1.69144
HmN_000082800	12537		9.25804	8.67476	9.142	9.08141	8.69578	8.7295	4.78697	4.02202	4.54177	5.29015	5.05026	5.52784	3.10589	3.17463	3.82362	4.87938	4.40137	4.12162
HmN_000082900	1248		5.27176	4.11919	7.03981	5.8592	7.55788	4.67008	1.65009	4.79243	3.05677	4.66298	1.60548	3.11388	5.68435	1.86103	1.51545	2.06531	3.69418	2.99489
HmN_000083000	672		719.084	748.673	704.012	691.636	679.171	650.476	612.891	629.999	594.388	722.339	758.522	856.285	499.916	507.59	563.532	679.408	683.276	832.206
HmN_000083100	549		0.357728	0	0.242471	0.350507	0.133184	1.76936	181.657	163.917	107.834	0.504762	1.94646	1.34829	182.485	135.954	109.576	114.869	113.631	161.351
HmN_000083200	528		1.30185	1.51453	1.13452	1.09334	0.415444	0.766554	11.7006	11.6761	13.915	0.174946	0.50597	0	19.1086	20.7943	22.3185	3.74259	3.82012	0.176971
HmN_000083300	579		53.4229	49.1286	63.7993	61.4841	57.0801	50.0508	24.1346	23.838	29.283	45.3082	46.371	46.9825	19.4675	23.1564	29.5238	23.7421	26.1273	25.4985
HmN_000083400	2178		32.9576	34.7752	40.5828	36.9602	33.5041	32.3346	35.0513	34.6851	32.1764	44.1924	40.9069	43.1196	30.2915	31.8943	38.3748	25.3648	23.2846	24.8832
HmN_000083500	12507		1.83721	1.8816	2.04352	2.08219	1.97016	1.76044	3.85758	3.98017	4.21375	2.09012	1.83698	1.8421	5.38848	6.10282	7.54927	1.95094	1.27865	0.545388
HmN_000083600	2154		25.8028	26.9952	30.7762	32.4586	33.0966	31.5675	36.1247	38.3608	32.3381	35.8507	42.3549	38.1017	38.1673	44.1595	43.3614	32.1889	25.7512	26.8957
HmN_000083700	567		159.504	160.781	174.671	164.826	171.769	177.315	101.954	110.353	112.883	164.379	150.303	177.057	117.887	126.425	113.539	70.6124	84.3603	83.2232
HmN_000083800	1107		51.4489	58.0998	56.0965	56.5523	51.2553	55.4279	26.841	21.0296	22.4636	47.6459	50.438	40.5379	22.8565	25.5583	31.0811	26.5434	23.2964	31.8222
HmN_000083900	1473		45.3317	40.3287	40.8477	40.0185	37.0802	36.325	34.4517	34.607	28.6802	30.1634	35.8198	34.0458	33.0704	28.6683	41.087	32.1969	24.4523	30.1319
HmN_000084000	2964		31.5726	25.168	31.6399	30.3835	30.2685	30.9427	47.4928	47.4664	42.33	21.0983	24.2456	22.601	46.0067	45.9469	54.1145	45.9151	36.0183	36.6008
HmN_000084100	2034		8.7865	7.58223	7.49353	7.44234	6.50657	6.48699	5.64077	7.3286	4.51519	4.49595	3.28358	5.36782	1.20133	1.40139	1.68086	7.8567	8.99572	5.51273
HmN_000084200	1743		578.756	589.939	604.675	627.408	577.729	578.108	1012.69	1045.58	767.006	592.809	667.038	592.266	794.2	915.616	988.878	811.207	676.722	783.444
HmN_000084300	1404		57.491	60.0486	55.6548	54.3661	53.6407	53.1582	34.259	31.458	30.7941	45.3304	46.8087	44.2204	28.9691	33.9121	38.1324	27.4762	19.7023	20.698
HmN_000084400	420		4.67602	5.43995	7.60665	6.56701	5.5709	10.7931	0.700447	2.84807	1.00922	10.9966	2.54431	4.40603	4.3165	1.75952	0.519584	0	1.71516	0.444956
HmN_000084500	495		554.462	549.27	520.364	515.087	602.227	610.953	57.6489	82.7203	86.2016	126.148	58.0179	67.4791	277.712	43.5081	37.7669	51.7237	53.2634	46.626
HmN_000084600	2988		43.6428	42.4381	38.9147	42.4399	38.8103	39.9593	182.095	197.025	162.475	149.748	167.328	123.864	121.98	136.027	145.313	222.872	206.177	190.134
HmN_000084700	948		0	0	0	0	0	0.170777	87.3564	67.2639	93.0014	0.194876	1.69084	1.95204	248.525	343.774	182.084	36.1612	6.83892	1.57706
HmN_000084800	591		381.155	374.224	354.301	365.104	396.025	384.88	227.236	186.053	193.408	280.396	325.239	356.643	174.851	247.762	219.333	142.468	152.849	162.217
HmN_000084900	1149		41.5348	46.133	44.6618	46.558	48.2363	48.6816	31.3647	32.9939	35.169	33.2022	40.1077	42.6798	34.6437	46.308	42.9866	23.8533	26.3319	18.7857
HmN_000085000	4329		19.8253	18.7099	20.295	18.9361	20.5048	19.8958	20.5231	20.3414	19.5829	23.9837	22.4324	22.079	18.6815	19.6803	20.6849	16.195	15.8084	17.7427
HmN_000085100	2391		125.384	127.282	128.941	125.925	119.295	115.176	126.239	125.226	125.808	120.187	126.928	115.745	103.416	122.791	138.091	135.361	127.924	154.406
HmN_000085200	1944		11.2138	12.987	11.6408	10.7565	8.98931	9.74375	13.3171	12.4485	11.2655	13.4471	11.0626	13.7553	9.56905	9.23204	11.263	14.0101	14.2294	15.4773
HmN_000085300	594		303.351	317.138	299.848	300.413	330.262	306.349	386.059	321.896	335.149	541.632	781.893	847.227	319.937	464.228	418.693	249.795	253.705	292.12
HmN_000085400	930		0.211175	0	0	0	0	0.0870409	5.37762	6.72795	5.46932	8.04525	7.03788	6.76539	6.3567	4.54069	8.44742	8.22215	5.26719	11.454
HmN_000085500	1878		35.3465	39.8437	38.0991	37.7411	42.477	40.043	36.2643	36.7471	31.8243	49.7271	40.7557	43.3072	39.2436	38.1697	38.1526	31.5211	34.9059	32.1918
HmN_000085600	999		0.589768	0.457413	0.532999	0.128414	0.512339	0.162058	5.15344	3.40795	4.52583	6.01015	8.95856	9.44717	4.73412	3.38166	3.78635	5.33218	3.89387	4.77025
HmN_000085700	1500		249.615	233.809	240.541	236.431	221.45	237.61	87.6679	95.2045	97.3022	104.749	114.519	118.434	101.892	111.694	106.833	79.7881	75.5904	65.4708
HmN_000085800	645		252.418	280.018	234.76	251.798	265.832	242.468	257.699	226.399	260.676	252.911	275.022	296.803	293.906	305.092	369.911	190.615	189.864	165.731
HmN_000085900	1089		15.2389	14.2667	15.0352	14.5485	15.5099	16.0558	2.4313	3.37979	1.68667	4.32593	2.45319	3.39859	5.86287	2.61747	1.73672	2.44575	2.24908	1.37287
HmN_000086000	720		0.272768	0.475995	0	0.445437	6.49938	5.05925	0.612891	0	0	0	0	0.128509	0	0	0	1.07396	0.400203	0.519115
HmN_000086100	1590		0	0.143697	0.334884	0.0403414	0.275917	0.203643	0	0.0578709	0.177724	0	0	0	0	0	0	0	0	0
HmN_000086200	1569		1.56463	1.38339	1.52715	1.38997	1.67766	1.18662	1.3125	1.05562	1.98113	0.588728	1.36215	0.471774	1.80856	2.15314	1.52994	0.711867	0.367299	0.0595543
HmN_000086300	378		22.341	19.9465	10.917	14.0843	16.8288	18.6309	48.253	58.1786	53.4512	15.1509	7.77427	9.5464	163.902	35.7489	32.7145	22.502	6.86063	4.69676
HmN_000086400	552		0	0	0	0	0	0.146645	3.19769	3.33386	3.83942	0	0.483972	0	9.2817	12.6226	8.43382	0.778232	0	0
HmN_000086500	252		0	0	0.26412	0.254535	0	0	0.583706	0	0	0	0	0	0.31279	0	1.44329	0.34094	1.14344	0
HmN_000086600	1878		64.1048	71.6578	76.8361	72.1693	67.7452	70.474	176.622	149.781	162.733	104.963	103.134	86.1217	152.358	172.635	201.26	159.481	142.079	149.167
HmN_000086700	396		417.335	438.781	427.754	408.506	419.136	413.53	709.839	753.544	955.496	838.574	949.2	1346.08	858.096	798.448	786.015	728.991	865.894	929.216
HmN_000086800	1023		0	0	0	0	0	0.0791281	0.287573	0.44973	0.276228	0	0	0.0904464	0.539356	0.309593	0.56885	0	0	0.0913399
HmN_000086900	2847		4.13894	5.33676	4.44189	4.46094	5.26491	4.35021	19.4265	17.3558	24.8636	23.977	22.5677	21.5798	16.6395	21.9523	22.5865	28.2466	31.5777	33.4444
HmN_000087000	600		112.762	103.386	107.492	112.464	128.81	121.287	65.2116	72.8449	74.884	95.7583	89.9413	103.938	99.317	66.8617	67.4073	43.2448	42.7417	35.8189
HmN_000087100	2931		28.4438	30.947	31.6555	33.2204	31.0833	31.8987	23.2359	20.8454	18.1735	21.7141	22.3311	18.7516	22.59	31.5525	29.3846	15.1256	11.3056	13.0709
HmN_000087200	2673		21.9316	19.4886	21.3644	21.6449	22.2391	20.4111	20.1958	24.4753	19.6633	31.447	29.4837	28.9038	21.4087	21.3275	25.7712	23.3354	21.1286	19.9606
HmN_000087300	1464		3.08541	2.88718	2.31863	2.2783	2.74692	2.9305	5.0237	9.36488	9.55449	14.1333	14.051	18.1388	9.52983	7.64381	9.63927	4.98834	4.6253	3.25511
HmN_000087400	1566		14.3595	16.9972	14.8757	15.1141	13.7271	14.6285	8.07795	10.4589	10.0149	11.8561	13.0505	10.6943	9.56346	11.1234	10.8695	9.38172	8.64807	6.26518
HmN_000087500	2145		5.9513	7.29638	6.39207	6.87779	6.98797	5.50975	22.3555	18.7032	14.2937	9.38786	11.7074	8.67033	8.56213	8.41616	10.9197	31.2425	29.0833	36.3308
HmN_000087600	717		0	0	0	0	0	0	86.9844	74.8181	100.106	0.257661	2.60818	1.29047	175.455	173.89	193.572	37.1467	27.1267	6.77673
HmN_000087700	774		63.5612	66.7131	67.4181	72.3472	69.9062	73.3134	138.352	126.966	91.0905	37.235	48.4947	45.4265	110.393	109.254	115.597	112.669	110.568	136.056
HmN_000087800	2925		9.06428	9.80306	8.5331	8.88132	8.84916	9.52005	32.7378	41.0212	31.4945	32.9695	32.7433	30.9688	23.876	24.0016	26.1124	47.6434	48.3199	48.8447
HmN_000087900	1698		37.5321	40.7035	41.3539	39.2488	35.0088	35.8975	12.9075	11.5425	10.9005	13.6544	15.1827	13.7864	13.555	14.4865	11.3097	11.3341	12.7273	14.6379
HmN_000088000	1080		1.00015	1.16354	1.04768	0.593915	0.270808	0.524663	64.2854	52.738	54.6847	0.256587	0.618408	0	79.042	120.625	79.0729	37.6284	33.2169	27.9457
HmN_000088100	687		0.428805	0.332573	0.0968824	0.373466	0.532155	0.353485	0	0	0	0	0	0	0	0	0	0.250122	0.419427	0.272025
HmN_000088300	2067		4.9882	4.64251	4.89446	7.29249	4.84624	4.58197	2.63303	2.40387	3.00764	8.6249	8.72413	9.17657	2.86005	1.63439	2.35786	2.36926	1.25463	2.21509
HmN_000088400	399		317.723	321.529	303.265	290.813	362.292	336.371	744.317	666.472	811.27	517.419	495.47	549.826	590.481	502.455	554.952	759.901	708.811	1154.78
HmN_000088500	3360		14.408	12.5119	16.5207	14.184	15.0588	14.0936	8.88692	8.62638	7.40094	11.4365	10.058	8.45407	8.14035	8.01209	8.70303	9.00081	7.80396	9.17721
HmN_000088600	1197		208.452	219.316	210.684	214.453	219.049	218.905	94.0073	83.4051	102.81	174.865	171.629	183.739	90.0835	93.841	111.088	64.8144	62.1067	62.528
HmN_000088700	1599		3.00914	1.85754	3.41324	2.96846	2.56073	3.23995	30.0811	29.9235	30.8383	29.6351	36.4223	35.4715	30.563	34.7282	33.2092	22.5673	26.9405	23.3164
HmN_000088800	1551		63.1217	58.7767	65.0563	66.2107	61.3324	60.3327	33.952	35.8922	43.6352	40.0812	34.0184	34.6006	52.6503	67.7942	61.6733	27.6418	20.0643	18.3146
HmN_000088900	867		503.214	498.461	489.475	493.538	519.417	519.393	141.325	130.221	141.617	163.008	162.233	160.508	181.92	167.428	144.141	95.1328	89.2356	92.363
HmN_000089000	14853		0.495841	0.407639	0.412264	0.302296	0.44305	0.414196	2.14902	2.07533	2.44474	0.0995046	0.0719457	0.236721	3.38048	3.1274	4.17752	1.13954	0.843895	0.226477
HmN_000089100	837		0	0	0	0	0	0.193424	484.865	418.738	444.297	95.9029	106.286	133.097	383.285	337.02	368.575	389.243	428.088	411.943
HmN_000089200	660		0	0	0	0	0	0.122649	0	0.139416	0.428153	0.139957	0.202388	0	0	0	0	0	0	0.283154
HmN_000089300	1029		14.1235	14.0995	14.5535	14.5241	16.4853	15.576	181.687	138.693	190.173	262.931	288.182	283.605	195.64	184.98	198.431	159.476	184.397	150.104
HmN_000089400	1014		162.111	157.726	162.129	176.741	178.613	187.043	126.06	135.844	127.357	124.802	128.307	131.855	134.792	118.377	119.012	110.912	114.662	142.465
HmN_000089500	1554		72.1623	72.9982	74.439	74.627	75.6588	79.3854	54.332	59.9813	51.3702	68.1789	66.0145	78.6536	51.7371	49.3209	65.9544	48.1554	47.839	50.1477
HmN_000089600	714		105.348	94.8791	113.168	105.557	116.846	116.547	160.691	154.775	171.171	108.155	97.8436	120.518	306.681	340.814	245.529	130.921	141.652	135.45
HmN_000089700	789		69.1979	69.2094	71.0292	65.4436	73.4887	70.8937	21.9988	20.9919	24.7124	16.9757	23.5324	25.2132	28.8718	45.0918	34.5731	16.0073	11.8691	12.4351
HmN_000089800	1218		42.2454	44.7389	48.7984	46.185	44.6632	48.3828	21.9795	24.7034	25.2885	32.2314	38.713	29.6268	24.5917	29.0364	26.2778	21.4439	21.6465	17.7215
HmN_000089900	870		97.7449	94.4112	97.1597	95.3296	94.9694	89.9733	29.2497	29.1909	40.276	39.9214	40.9941	38.1805	44.757	46.4756	44.8992	23.9975	23.5154	19.977
HmN_000090000	243		36.369	20.2151	12.8734	11.8783	11.735	8.32799	0.605324	0	0	1.14039	0	1.1423	1.2975	0.868898	0	0.353567	0	0
HmN_000090100	579		0	0	0	0	0	0	0	0	0	0	0	0	0	0	0	0	0	0
HmN_000090200	837		614.871	602.177	625.902	606.79	708.293	684.142	593.12	451.059	504.224	533.591	611.546	679.856	473.786	515.873	497.459	500.822	582.489	601.28
HmN_000090300	840		364.496	374.404	361.633	379.588	382.477	367.254	2418.82	1844.46	2149.47	1246.68	1412.57	1378.1	2023.41	2116.83	2284.61	2370.69	2430.03	2591.2
HmN_000090400	507		273.284	285.259	270.434	272.639	271.705	275.734	1790.37	2769.88	3047.92	3731.48	2401.21	3343.01	4363.87	1611.05	1056.98	1485.33	1840.84	1401.61
HmN_000090500	861		1.82479	2.38827	2.16449	1.71346	1.18891	1.31623	74.9991	61.8775	69.4146	1.60926	0.930844	0.967178	20.5068	12.3841	13.6021	132.218	144.073	217.269
HmN_000090600	339		0	0	0	0	0	0	0	0	0.416787	0	0	0	0	0	0	0	0	0.275636
HmN_000090700	2271		61.3565	62.024	59.2312	62.1375	58.0501	57.1734	45.728	46.1491	54.8738	79.925	87.4039	69.507	43.4203	51.6466	55.8615	50.3546	49.0394	59.1256
HmN_000090800	2607		33.2595	32.7336	32.5515	33.0187	31.721	32.2302	54.335	56.1194	59.5621	43.0145	44.3717	42.6964	77.6439	100.793	85.9117	50.0275	41.9454	38.1003
HmN_000090900	2331		6.61383	7.69434	8.70882	9.2183	8.53201	7.88297	6.24723	5.05271	6.1826	7.48957	6.87651	6.31134	7.10117	6.11416	10.3917	2.39579	1.6688	1.20258
HmN_000091000	534		9.92997	10.6965	9.4727	8.28812	9.85861	8.79211	42.1449	42.3888	51.8595	24.9091	33.5191	33.6146	63.1765	68.6014	66.748	22.6859	31.2968	20.298
HmN_000091100	966		16.8743	16.2016	20.3947	17.8617	15.7438	18.603	17.6634	15.05	19.1605	24.3838	29.7297	34.1946	15.1771	14.2073	15.964	14.6752	12.0807	15.6702
HmN_000091200	315		4.67602	2.53864	1.90166	3.25805	1.39272	3.08374	1.40089	2.9211	4.48542	3.22567	3.39241	4.9935	2.00185	0.670293	0	1.90926	0	0
HmN_000091300	2163		41.4032	45.2625	41.8797	41.9019	39.6183	38.9584	49.9153	35.904	39.0623	50.4349	39.8938	38.9699	34.1093	33.7261	30.1325	39.602	43.0288	54.3451
HmN_000091500	1437		22.9603	25.6779	24.3167	24.2823	22.083	22.9832	29.992	23.8201	22.3194	27.1907	28.6301	24.6609	22.2153	19.0278	17.8184	22.0024	19.1496	32.5775
HmN_000091600	990		18.3498	20.1937	18.2867	16.5864	15.8792	17.8249	73.1012	51.7699	80.0647	109.446	107.805	108.228	60.1125	63.236	68.4066	67.4317	87.7537	94.3846
HmN_000091700	1542		149.587	142.391	141.922	144.342	139.076	138.221	146.808	155.745	142.115	137.419	139.727	169.812	122.682	160.274	102.838	148.878	198.264	222.513
HmN_000091900	330		138.368	149.549	151.269	148.5	126.96	119.214	52.5972	58.5548	47.525	88.1727	66.3833	83.8348	41.3224	36.1501	36.3709	49.988	64.178	68.8063
HmN_000092000	324		1.51538	3.87848	3.69768	1.78175	2.03106	2.99808	0.453993	0.851988	0.872165	3.70626	1.23682	0.571152	1.45969	1.62918	0.898046	0.795526	0.889341	0.288397
HmN_000092100	387		211.363	208.405	212.574	204.859	210.474	216.071	279.364	337.149	319.091	219.591	196.74	305.553	295.332	342.356	214.278	303.262	376.005	374.246
HmN_000092200	714		114.425	112.639	116.803	113.463	107.629	113.713	291.509	240.991	242.213	278.408	296.524	326.306	255.788	258.309	285.975	193.012	226.804	280.322
HmN_000092300	1659		363.842	377.766	370.544	359.03	378.46	367.95	196.746	187.912	180.297	206.012	244.286	264.808	172.28	210.697	208.316	171.264	195.832	194.372
HmN_000092400	1008		0	0	0.13206	0	0	0	16.6356	12.506	17.8015	0.183277	0.530064	0.183585	48.4824	45.7684	21.1442	10.6544	3.14445	0
HmN_000092500	1179		2.91507	4.26337	3.83881	3.75391	3.72102	3.36425	33.6856	43.5489	30.1995	23.1908	26.9645	20.483	29.2829	25.072	28.6895	36.9464	25.6619	40.8159
HmN_000092600	1881		59.7218	55.2671	66.9828	65.4046	60.99	61.023	41.2113	37.0798	42.7402	46.2102	43.1051	41.91	48.1906	61.0079	58.5878	35.4904	27.8802	35.9655
HmN_000092700	771		34.1331	34.3754	29.9555	33.9433	40.3999	42.5214	41.7815	40.5772	38.6671	57.5075	73.6315	87.7263	44.7788	50.3893	39.0597	32.4278	32.5146	31.9953
HmN_000092800	1677		30.8584	31.3356	31.3939	33.0468	30.4332	34.5127	41.4003	28.0379	40.0197	16.1388	13.7798	13.2969	30.9276	33.2388	31.3609	42.5742	37.4573	69.3144
HmN_000092900	3144		27.5787	26.2706	28.8334	28.4399	26.582	26.339	27.5099	27.2766	26.4695	30.3204	27.531	28.5173	30.6868	35.2575	34.4736	25.6329	20.5753	22.2011
HmN_000093000	3129		31.1316	29.8284	34.247	34.1726	32.1542	31.7946	34.1292	33.2888	31.2926	25.5357	28.5167	24.5141	40.5073	62.2832	50.2148	26.9914	18.4178	19.8886
HmN_000093100	1635		34.7141	35.145	34.3172	33.5818	37.3864	32.9733	24.2008	18.628	17.9746	20.1692	18.382	23.542	23.4782	30.1539	21.1329	15.2916	14.0108	16.9736
HmN_000093200	636		371.016	372.174	351.105	350.769	343.632	349.884	151.719	144.243	163.062	149.014	187.133	158.867	168.924	201.183	171.789	142.925	107.828	124.441
HmN_000093300	2094		49.192	45.2264	50.5703	49.9604	47.5232	46.5819	33.7178	34.4066	19.3651	15.2188	19.3284	19.1328	28.0059	21.578	17.2301	16.0427	10.8708	23.4271
HmN_000093400	2013		1.36587	1.13501	2.41369	1.72067	1.63453	2.01063	7.67255	12.7532	4.14116	1.37662	1.12806	2.06841	1.84038	2.15023	1.77066	21.8953	21.9724	8.35535
HmN_000093500	1920		105.152	101.684	110.41	104.733	104.574	97.2642	140.505	131.217	120.612	109.883	110.409	93.9242	105.097	112.884	121.539	176.398	190.672	167.415
HmN_000093600	846		61.75	69.5426	63.4113	65.4318	74.8466	70.5186	74.4163	78.0928	80.3319	73.5914	73.1037	71.5277	78.9162	101.703	80.0503	64.6915	66.7573	74.6642
HmN_000093700	2289		32.9037	31.6415	34.7475	37.5218	33.9557	32.7824	33.8014	36.5004	33.7024	38.0543	38.4564	34.2781	30.5788	31.0395	29.1094	38.2103	32.6667	42.8219
HmN_000093800	459		0.855742	1.49332	0.290014	0.978214	1.11509	1.41086	23.0735	17.6412	20.3163	0.40249	1.16406	1.2095	47.3968	53.1306	26.9414	12.5412	6.2777	16.286
HmN_000093900	744		1.97977	1.38192	1.25244	0.689708	1.2776	1.19681	116.054	120.213	158.572	0	3.77029	3.23346	426.428	453.785	269.164	92.7301	37.9548	0.879147
HmN_000094000	660		0.892694	0	0.100846	0.0971862	0.44314	0	4.23452	5.43723	5.99415	0	1.6191	0.140192	9.55431	8.79759	10.3602	6.11832	5.67561	0.991038
HmN_000094100	813		0.120783	0.140515	0.0818674	0.157793	0	0	4.88503	5.09306	4.34473	0.227236	0.821502	0.113809	7.4654	8.44049	7.96311	2.959	9.39222	0.3448
HmN_000094200	516		0	0	0.386966	0	0.141702	0.313752	0.285066	0.178323	0	0	0	0	0.458273	0.40919	0.281945	0	0	0
HmN_000094300	411		9.07898	11.1181	7.93516	10.6124	7.82772	12.6051	0.715785	2.46268	4.46905	8.31567	15.2751	13.5075	3.4521	2.05491	0.884936	1.25426	2.10326	0.909399
HmN_000094400	207		3.32065	4.41503	1.28615	3.40856	2.47259	3.91053	0	0.444515	0.682564	0.446239	1.93589	0.893978	0	0.510005	0	0	0	0
HmN_000094500	852		1.84406	0.804499	1.64052	3.08669	1.45893	0.760076	0.345291	0.431994	0.995005	4.77035	4.86017	5.42997	0.185031	0	0.170755	0	0	0
HmN_000094600	9924		7.49039	8.20761	8.56458	8.73207	8.72348	8.78487	3.94266	3.6995	4.24271	4.8494	4.10527	3.95318	4.0587	5.15941	5.06495	3.28984	2.87449	3.07891
HmN_000094700	6120		17.9866	17.6212	18.2383	19.5678	19.6415	19.3244	23.4581	24.8981	23.8717	24.3758	22.6337	21.5442	20.1179	23.305	24.5325	29.1163	27.8259	28.7651
HmN_000094800	396		29.2605	36.3487	40.1702	38.8745	36.9283	34.1372	9.28623	9.29441	6.4223	11.4298	6.74627	6.30864	12.341	5.33187	6.2455	3.03746	2.18293	4.24731
HmN_000094900	1047		103.73	109.438	110.867	111.254	113.064	109.245	195.704	200.815	183.664	168.421	174.912	196.012	255.817	321.957	279.503	109.304	95.2231	78.8043
HmN_000095000	270		598.27	603.35	573.14	565.645	656.708	632.594	158.534	199.024	339.098	478.621	242.911	337.894	415.718	139.979	72.2029	104.055	160.081	139.815
HmN_000095100	1662		40.1175	37.2548	40.4876	44.1899	42.7622	42.13	53.899	57.9659	52.7927	56.1342	58.5903	56.6183	45.7667	44.0832	45.5183	66.8414	69.696	77.5299
HmN_000095200	498		64.084	67.901	68.563	66.8477	70.4752	79.6477	29.2415	34.5517	32.9111	39.8792	45.5983	47.3781	47.3255	29.0427	22.3484	23.9808	25.748	26.4561
HmN_000095300	531		751.174	734.27	702.935	707.746	836.933	808.109	293.634	511.019	627.16	697.917	357.209	576.419	686.695	269.992	156.306	220.051	272.41	216.445
HmN_000095400	1641		5.98393	6.68308	5.27274	6.60582	5.83697	5.27815	15.8657	13.2891	13.6039	8.83748	8.87252	9.64172	22.0954	16.984	24.8678	6.64926	5.97012	4.09978
HmN_000095500	420		0	0	0	0	0.174091	0	0	0	0	0	0	0	0	0	0	0.204564	0	0
HmN_000095600	450		0	0	0	0	0	0	0	0	0	0	0	0	0	0	0	0	0	0
HmN_000095700	297		59.8436	67.6971	45.2686	59.8235	61.301	58.8713	0.495265	1.23925	0.951452	0.933044	0.449751	0	0.530795	0	0	0.289282	0	0.62923
HmN_000095800	6588		11.1939	11.3927	11.6992	11.2454	9.73354	10.7021	5.89447	5.71251	6.56268	11.7357	13.463	13.3706	3.29027	3.4293	4.93557	5.85559	4.3082	4.49616
HmN_000095900	2034		17.2833	18.3097	18.1284	19.8988	16.6439	16.4364	4.19442	3.6643	5.20983	18.8467	19.5702	18.6509	3.604	3.99655	4.18426	3.63267	4.74577	3.99673
HmN_000096000	1689		22.616	22.3202	24.0776	24.7229	21.4722	22.5255	2.96104	4.08591	4.43363	18.1024	23.2513	19.9954	3.5468	4.37536	7.83836	2.84863	2.72963	3.81729
HmN_000096100	702		30.7738	25.2237	23.4186	30.3354	25.4143	26.7521	163.228	119.934	150.952	282.114	284.848	326.611	147.765	195.201	228.898	80.7765	125.192	88.9151
HmN_000096200	330		0	0	0.403383	0	0.22157	0	12.4807	7.80731	11.9883	0.559827	0.809552	0	25.5578	36.7899	22.0429	2.60354	0	0.566307
HmN_000096300	1551		10.763	9.50149	8.45388	7.44405	9.42851	9.1334	4.26771	6.82249	6.46785	16.7352	13.8657	17.3003	5.53946	7.21505	7.50398	4.81932	4.36585	4.27743
HmN_000096400	390		0.251786	1.4646	0	0	0	0	0.377164	0	0	0	0	0	0	0.270695	0.559552	0.440599	0	0
HmN_000096500	2127		32.686	28.1435	32.4812	32.1167	28.8416	29.837	23.7203	27.427	31.0879	31.2682	31.7769	23.7516	28.572	32.1627	29.2745	25.1247	19.2368	16.2104
HmN_000096600	1791		46.6035	45.67	43.2573	49.4233	46.4183	40.813	37.5332	36.5798	41.1802	49.8733	41.9896	46.5475	43.9666	40.0239	39.0311	36.1225	34.1078	39.338
HmN_000096700	2316		44.0527	39.5594	45.6654	45.753	48.4297	43.41	18.4185	17.9182	17.9359	23.6113	27.7995	23.691	18.2083	17.9599	19.3789	15.4324	15.4897	16.5417
HmN_000096800	468		35.6696	35.1504	37.119	37.6908	24.0602	30.442	13.2007	32.6377	20.8313	42.6329	26.544	30.2491	18.6952	7.89527	4.04121	16.3389	19.0866	14.9745
HmN_000096900	417		47.803	50.4076	45.9683	40.7623	43.1344	43.4829	10.2295	13.6808	16.2637	13.7339	8.32849	6.87848	23.0609	10.3799	6.80318	8.03539	11.747	10.9798
HmN_000097000	225		0	1.52318	0	0.285079	0.324969	1.07931	6.5375	6.95222	3.76775	0	0	0.41123	7.70714	2.34602	0.646593	4.58223	2.5613	15.7811
HmN_000097100	1314		49.5466	48.5993	49.0322	47.8387	46.7421	46.1416	47.688	45.7973	54.6238	43.5847	44.5254	47.6012	40.6712	43.1444	38.0316	65.9742	71.3787	83.4851
HmN_000097200	1644		52.7417	57.4669	58.6231	60.8655	59.0193	56.6243	25.7683	23.7872	21.8296	24.3851	30.3878	29.0412	35.5758	46.6208	35.7072	15.6783	14.0217	11.1401
HmN_000097300	810		37.4601	38.2207	37.8807	41.0198	35.205	40.3741	25.6052	22.4925	24.9439	36.8345	36.9396	35.5257	28.7071	28.804	31.9704	14.3195	17.7868	21.5721
HmN_000097400	354		245.768	235.577	247.431	224.681	271.404	291.093	11.6345	15.8556	14.7677	26.0936	15.848	23.7851	44.0875	9.54315	10.8907	9.46541	6.51178	7.39079
HmN_000097500	1050		65.8383	65.1706	72.5168	68.1136	69.0095	72.2365	42.5872	46.8837	41.5798	49.3527	53.3032	58.3359	57.3531	58.5166	51.0577	33.7121	33.6171	23.1377
HmN_000097600	1182		16.9476	17.9767	17.3997	15.4117	13.5473	13.1489	9.95559	9.34159	5.61816	8.20558	11.6399	10.8026	6.2685	3.57263	3.01552	5.8877	1.82834	10.435
HmN_000097700	366		0	0	0	0	0	0.442339	0.803791	0.251406	0	0	0	0	0.861454	0.288446	0.596243	0.234745	0	0
HmN_000097800	510		0.770168	0	0.391519	0.628852	0.573475	0.95233	0.288419	0	0.831121	0.18112	0.523828	0.36285	0.61822	1.44902	0.570523	0.336929	0.282496	0
HmN_000098000	2637		11.6182	12.0867	13.5287	12.308	13.1152	12.9234	13.7778	13.9575	12.8592	12.05	13.8287	13.4386	16.8885	21.7388	23.6955	9.18792	7.37576	4.81909
HmN_000098100	4287		14.4763	15.1892	14.8269	15.1268	14.7191	13.954	11.563	10.7962	11.9967	12.9928	15.3611	13.3599	11.418	16.1299	14.321	8.27703	6.31811	5.07854
HmN_000098200	3015		26.3811	26.5989	28.3673	29.0185	28.5924	29.9092	14.1483	15.5036	13.7776	15.6556	18.3861	14.4237	14.379	14.9865	14.5001	15.7585	14.8613	14.8141
HmN_000098300	537		102.036	91.0507	100.395	92.0934	119.957	120.141	44.3747	55.0032	71.04	82.5666	90.792	111.825	56.8054	80.6036	66.646	49.5982	49.6341	47.3294
HmN_000098400	1035		62.7128	52.5388	55.3687	49.8269	46.9792	50.5241	28.7082	31.7384	32.7631	62.2057	61.8193	61.7738	22.0095	23.2562	25.1609	26.8957	24.221	24.3758
HmN_000098500	699		14.7505	17.6506	17.6156	16.8845	13.1801	11.5806	1.68348	2.1062	1.61706	3.0394	2.10206	1.19133	1.57872	2.11444	1.24878	1.10623	2.47336	2.67355
HmN_000098600	2772		16.0472	16.5259	17.5039	16.6142	16.987	16.5868	28.2832	28.9786	27.0144	32.19	30.31	26.5363	22.7483	21.3275	26.7927	33.1022	28.7419	30.4727
HmN_000098700	1650		43.5635	45.2109	43.8477	45.7552	47.1944	42.5345	66.5042	61.2873	53.1767	45.29	44.6063	45.8147	62.7718	73.7718	64.3213	73.8885	73.4337	57.82
HmN_000098800	429		356.391	375.737	344.117	325.499	396.781	400.778	124.807	104.884	125.482	215.964	112.403	122.291	259.62	73.0877	44.7641	77.3051	128.625	134.607
HmN_000098900	675		76.5204	67.1894	74.0522	74.6908	80.2674	77.7101	40.0967	39.3959	35.1657	41.6013	51.4516	50.9925	50.7971	69.5987	66.168	37.6761	27.3205	29.0704
HmN_000099000	633		0	0	0.420589	0.101332	0.231021	0	0	0.145363	0	0	0	0	0	0	0	0.271459	0	0
HmN_000099100	1812		42.9203	41.7993	47.4944	46.0186	41.4416	41.3228	38.2347	38.5934	35.7125	36.8568	31.2562	27.472	30.6679	34.1416	39.1007	40.1135	39.9143	44.3482
HmN_000099200	504		1.94834	1.13332	0.92442	1.78175	0.870453	0.642445	9.63114	5.47706	3.08372	6.04813	5.30064	6.05829	3.59708	4.3988	5.19584	7.50068	8.00406	5.93274
HmN_000099300	5130		12.3846	11.1344	13.3635	14.0289	14.025	14.0278	28.6159	24.7345	26.881	13.0004	13.644	12.391	38.1823	49.1019	41.1494	19.9468	23.619	12.7684
HmN_000099400	1569		210.162	201.902	227.927	228.772	237.389	235.054	144.656	137.113	146.153	188.216	202.45	191.54	160.258	200.915	216.695	75.2388	51.4219	54.254
HmN_000099500	1836		51.291	49.1551	54.8852	51.1815	50.5773	45.9852	12.7385	14.6843	13.3133	33.457	32.1572	30.8926	9.65968	10.2926	12.3613	12.9156	10.9075	18.3217
HmN_000099600	2313		45.6806	49.6863	48.5734	49.0847	45.6474	46.301	26.7732	27.0117	28.8323	32.6275	41.4069	33.5624	25.4565	27.7963	34.1222	24.1072	21.2404	24.1176
HmN_000099700	1083		71.4485	73.4167	74.9164	79.3642	76.8313	73.9221	66.0089	59.9837	69.9278	87.595	95.5877	96.8839	70.4531	89.8768	79.6599	57.6745	53.2126	60.6545
HmN_000099800	3399		61.5352	64.4295	62.7202	64.3693	59.4367	60.8242	85.1664	81.4299	90.8683	87.0992	92.4698	86.6196	93.5951	99.4834	115.544	62.9905	67.3528	57.8403
HmN_000099900	2448		46.3304	45.6862	51.7675	52.4829	49.7012	54.5936	40.7392	42.8876	35.8421	51.1288	49.3817	44.0711	34.9037	34.2847	39.9069	40.9228	37.3719	44.5828
HmN_000100000	1251		132.498	129.946	127.051	134.182	134.079	135.819	86.7748	90.9114	97.2432	154.912	173.937	149.034	97.2214	107.596	115.014	58.0333	55.1647	44.1435
HmN_000100100	1836		174.839	182.247	178.105	179.782	163.958	166.526	86.6059	82.743	68.1058	117.628	131.175	115.507	60.6628	61.7556	62.3217	82.7815	73.3706	98.072
HmN_000100200	594		6.94318	10.193	15.6871	14.4699	13.9097	11.9923	1.4858	2.1687	1.18932	3.42116	5.39702	4.04999	0.928891	2.13275	2.20429	1.59105	1.21274	1.41577
HmN_000100300	1023		44.6347	47.0133	45.8686	47.8407	48.4595	53.5697	47.162	39.5762	50.826	43.2511	37.8662	37.9875	67.3424	82.2485	64.4223	35.5257	35.3493	35.0745
HmN_000100400	4785		28.6073	26.6677	26.6094	27.9762	25.7327	25.4771	24.1006	23.2681	21.2305	29.0145	26.2407	25.8533	21.6454	23.0558	24.5361	23.3421	20.3539	19.3911
HmN_000100500	204		0	0	0	0	0	0	0	0	0	0	0	0	0	0	0	0	0	0
HmN_000100600	222		2.65396	1.54377	2.69831	2.31145	2.96425	2.55242	0	0	0	2.08044	1.80508	3.33429	0	0	0	0	0	0
HmN_000100700	1833		23.25	25.8642	25.3814	26.0351	27.2846	27.2918	27.8459	37.1472	36.3825	56.3904	51.8856	51.6898	29.8865	27.9334	28.3744	35.951	39.1426	40.6286
HmN_000100800	2775		7.04183	6.83375	6.90766	8.92222	7.87831	8.57612	2.01426	1.55845	1.98571	2.36338	2.06983	2.10061	2.07354	2.0924	2.49026	1.33132	1.92098	1.27955
HmN_000100900	306		14.4406	11.9465	9.57046	11.7386	9.31897	9.78784	11.5368	12.6295	12.9286	25.3569	10.04	7.86174	28.3351	6.90007	9.74644	10.3886	15.0665	12.5198
HmN_000101000	531		4225.96	4221.46	3893.22	3904.5	4165.25	4139.17	332.415	533.373	655.099	975.379	466.133	515.431	1468.99	216.113	149.456	206.621	205.121	157.846
HmN_000101100	4140		2.22958	2.42827	2.55622	2.61839	2.66687	2.13124	19.4349	21.7368	12.2861	17.4033	15.6807	16.7621	7.69191	6.37507	8.73252	16.5193	11.6581	23.7664
HmN_000101200	876		0	0	0	0	0	0	0	0	0	0	0	0	0	0	0	0	0	0
HmN_000101300	2553		6.96183	5.95134	5.73553	5.97963	6.55857	7.10238	51.1631	52.5489	60.8219	19.2847	20.7192	14.062	51.6842	62.772	85.6774	45.6675	43.3405	31.8789
HmN_000101400	3024		27.1469	26.6708	28.9651	26.0899	26.1861	26.019	14.544	15.3662	16.1662	14.5094	15.7694	12.4226	15.3267	19.5851	18.4741	13.8933	13.5783	12.638
HmN_000101500	669		132.396	140.365	141.672	138.065	147.657	149.312	132.582	127.088	149.95	114.601	108.618	117.975	170.371	148.967	140.047	147.047	150.318	148.053
HmN_000101600	408		453.918	417.476	418.925	419.444	462.723	456.325	29.2025	43.0755	45.7117	75.165	36.3406	52.84	129.44	10.0914	17.8288	16.2147	18.7154	12.8252
HmN_000101700	2268		70.1403	70.1652	72.1928	73.9566	62.3825	65.1368	46.5667	45.8451	46.1624	44.2307	53.5954	46.1409	36.2836	38.7746	42.9138	52.2396	47.5797	47.256
HmN_000101800	12435		1.29507	1.16673	1.47729	1.17092	1.55233	1.50374	1.15924	1.44293	1.45438	0.71312	0.902324	0.691997	1.01421	1.32441	1.53849	1.68586	1.47143	1.26241
HmN_000101900	960		130.928	136.968	132.7	141.515	146.465	146.044	83.6596	89.8102	82.1252	83.038	99.069	121.152	77.4272	72.3602	74.636	70.3444	71.1361	41.4643
HmN_000102000	483		3945.95	3874.19	3734.29	3719.76	4121.56	4127.85	237.847	276.997	324.413	781.045	505.819	413.975	679.216	154.094	109.79	121.671	182.552	170.244
HmN_000102100	2370		42.7175	40.0077	46.001	48.0395	42.5134	43.9237	28.3637	29.235	29.8082	58.9306	55.2904	52.1195	28.1368	29.5777	30.1095	22.2949	20.5471	21.7634
HmN_000102200	891		82.5467	87.6985	100.771	95.6744	89.2024	90.76	18.3248	15.594	17.4433	26.4363	30.2833	26.0653	11.8544	17.299	17.6344	11.6677	12.7742	11.1164
HmN_000102300	1239		367.028	376.371	353.312	354.572	348.712	349.534	68.7388	62.7542	78.0007	212.551	202.79	199.392	73.0338	65.524	69.2778	28.9857	27.2099	24.1332
HmN_000102400	1299		58.3584	55.8443	67.4293	68.6363	67.3767	63.562	69.527	65.5224	60.3667	63.4298	65.3999	67.6677	74.4541	81.7587	72.9097	45.3064	42.8116	44.4545
HmN_000102500	1368		20.4576	21.044	23.4511	22.2718	22.6089	25.0892	13.7632	13.9905	14.0464	13.4371	11.8149	14.2713	16.4215	20.9907	18.6108	12.3725	9.05723	11.4069
HmN_000102600	1959		23.1581	23.6175	23.715	23.28	25.4551	22.1894	18.2459	22.8745	21.2044	27.9142	29.0472	28.2445	15.0484	17.9994	19.3829	27.8056	23.24	25.6616
HmN_000102700	381		408.765	402.984	414.024	426.272	472.677	479.739	14.6708	21.9773	28.184	35.1545	14.0237	32.0565	76.1335	12.7461	11.8372	9.69665	12.8569	3.92402
HmN_000102900	255		0	0.447996	0	0	0.286737	0	0	0	0	0	0	0	0	0	0	0	0	0
HmN_000103000	2586		0.189862	0.176704	0.283117	0.297647	0.113098	0.187815	0.227523	0.0355819	0.16391	0.250039	0.0516536	0.500918	0.091442	0.122472	0.28129	0.199343	0.167138	0.144533
HmN_000103100	240		0	0	0	0	0	0	11.032	8.43468	14.7178	0	0	0	28.9018	50.5862	19.7009	4.65383	1.20061	0
HmN_000103200	237		41.0187	39.5257	34.5429	35.7251	45.0432	44.7434	178.747	209.654	202.099	1892.64	1331.82	1062.3	289.683	153.679	168.81	85.9168	72.3405	118.279
HmN_000103300	255		452.088	478.459	461.209	436.171	371.612	332.046	6.34522	13.712	7.75713	6.88257	5.23828	7.25699	11.128	4.55405	3.42314	9.434	7.34491	9.16085
HmN_000103400	1407		69.5819	69.5014	76.7288	76.2238	74.729	75.5976	31.886	23.9356	28.9209	56.5914	59.2406	49.5185	29.6917	28.9626	29.6757	19.7847	17.7148	17.3334
HmN_000103500	1293		50.655	50.0955	48.5932	44.3494	49.8198	43.886	33.1046	33.1623	40.8683	41.5064	35.1244	46.6569	53.2802	61.3994	53.614	27.1771	23.0651	21.0296
HmN_000103600	3210		21.9642	26.4778	23.4094	22.5599	24.2588	23.9314	22.3619	24.7379	16.5499	14.4456	16.8115	11.3569	20.4547	22.956	27.0345	18.2272	15.5743	17.2036
HmN_000103700	1731		2.04221	2.70583	3.15296	2.70504	3.33699	3.27346	7.47791	6.37883	6.12178	4.58922	4.24419	6.84195	5.64648	5.36699	6.93378	3.52403	3.32925	6.90954
HmN_000103800	825		461.225	467.895	435.492	448.456	448.901	458.706	376.204	338.168	294.912	258.192	248.856	259.075	307.553	273.077	273.773	325.963	335.996	355.528
HmN_000103900	483		0.40661	0	0	0	0.151383	0	0	0	0	0	0	0	0	0	0	0	0	0
HmN_000104000	636		0.771984	0.179621	0.523256	0.403414	0.114966	1.01821	0	0	0	0	0	0	0	0.331985	0.114374	0	0	0.146919
HmN_000104100	723		3.8029	3.79216	2.39352	3.10512	2.12376	4.03061	1.42414	0.890875	1.95423	0.383284	1.47802	1.91964	1.19924	0.584072	1.10672	1.78251	0.797085	1.2924
HmN_000104200	1098		1.87807	1.87277	1.45482	1.51887	1.93117	2.50659	3.21517	2.59786	3.60304	1.09365	2.06812	1.26403	2.51257	1.82682	2.98122	2.66045	1.31214	1.95732
HmN_000104300	864		74.8975	76.8204	65.8649	69.8593	68.3789	67.4567	33.5388	32.5885	39.738	53.9902	67.4065	67.4674	49.3556	52.1746	52.5357	18.5954	17.8424	21.3053
HmN_000104400	756		2328.01	2294.9	2215.53	2230.92	2318.79	2317.19	2239.48	1943.38	2445.86	2951.97	3027.02	3150.92	2191.82	2229.42	2460.52	1842.89	2163.77	2114.16
HmN_000104500	765		191.002	207.87	205.156	216.577	227.67	225.067	86.1412	83.9559	103.983	77.6403	78.9234	104.622	133.329	139.381	115.626	81.986	75.709	66.4467
HmN_000104600	654		175.672	173.28	153.572	168.792	175.081	167.837	159.239	132.676	153.821	200.279	224.057	261.876	148.004	166.266	158.274	137.283	169.187	150.591
HmN_000104700	8733		10.7271	10.6612	10.6929	11.9795	10.6918	11.6607	13.1042	13.2759	10.484	9.59359	9.36088	8.12641	8.04206	8.64346	10.5119	19.0566	17.4214	24.0637
HmN_000104800	2592		16.2145	16.7921	17.718	18.3866	16.9819	15.6774	5.33442	4.93443	7.08634	5.55939	6.75096	7.35359	6.35571	7.12768	7.12824	2.61861	2.89036	1.47804
HmN_000104900	654		100.148	97.9939	109.404	96.4105	87.4286	94.5632	65.45	59.092	76.6945	54.9426	59.231	66.6362	82.4388	105.571	95.7655	62.1386	62.7842	75.4384
HmN_000105000	2130		34.1613	30.7319	33.5603	35.2635	34.7053	34.6595	39.9156	43.8906	42.9842	47.2699	44.9644	37.7926	53.1408	61.6575	54.4026	35.4962	27.5295	33.3842
HmN_000105100	735		41.4162	43.2087	41.2933	40.6675	47.5516	40.5291	21.4137	23.9113	25.3746	28.4026	25.8066	29.5834	33.7813	36.4831	33.3523	17.7678	15.6814	14.62
HmN_000105200	1983		27.3345	30.1872	28.4291	26.8151	24.5202	26.0846	25.1461	24.1289	25.4366	34.0046	31.5921	30.7489	21.0672	23.5312	24.8342	37.001	31.7499	40.5711
HmN_000105300	2175		68.0828	64.6041	64.3243	70.1	66.4954	67.0659	87.7153	91.507	97.7017	110.336	100.904	94.909	84.9477	85.5733	98.7281	102.389	107.84	111.57
HmN_000105400	1035		199.619	206.623	201.025	206.992	203.459	202.096	186.745	198.698	172.279	192.24	171.778	200.072	166.023	170.138	175.845	232.93	224.949	242.765
HmN_000105500	1587		71.2187	63.778	66.3905	68.2251	61.8301	69.0634	44.8604	49.6891	48.1652	56.2261	51.0064	57.8948	52.3997	59.0054	59.8618	44.772	37.312	38.6245
HmN_000105600	252		36.2391	27.1997	29.8455	32.0714	30.4659	26.3402	12.8415	6.57248	11.2135	15.0287	17.4921	18.7256	9.38369	17.1763	20.206	10.5691	14.293	11.4947
HmN_000105700	495		82.3262	66.0047	81.7523	73.8615	100.74	82.9104	12.7778	15.0569	21.4077	22.2065	13.4925	14.58	51.434	13.223	8.22936	4.85994	6.98537	9.06092
HmN_000105800	1218		169.868	168.826	167.871	170.205	163.945	170.071	164.363	157.211	161.591	174.808	186.436	194.929	148.133	149.429	178.988	138.68	136.503	147.756
HmN_000105900	1191		283.541	283.055	272.939	281.292	273.563	279.682	322.841	283.152	342.253	423.388	397.252	401.415	296.165	292.071	300.311	348.717	376.09	471.832
HmN_000106000	510		5.77626	7.61592	8.09139	6.03698	5.44801	3.6506	94.8899	91.8343	119.404	98.8917	88.0031	65.6758	99.2243	95.221	91.1411	60.3102	74.2966	54.9651
HmN_000106100	2130		24.7565	25.2076	23.311	23.8503	21.5921	22.8783	147.784	160.356	173.728	176.546	204.629	179.146	167.379	172.235	202.721	113.588	114.379	77.7357
HmN_000106200	1014		258.855	253.151	244.441	244.742	249.928	252.264	69.7753	68.7841	79.5631	130.632	147.408	123.186	93.4372	85.1649	83.0719	55.0749	49.3031	32.1606
HmN_000106300	1275		27.1869	26.1629	26.7799	28.1222	27.1827	31.5539	24.458	19.7741	21.4983	19.7059	22.7341	23.4401	42.9663	41.98	35.6577	15.2966	10.7349	8.79442
HmN_000106400	618		140.462	149.731	130.962	132.956	147.419	154.299	122.816	139.958	152.722	195.504	193.015	169.932	222.694	128.804	93.6932	90.3656	94.4169	116.272
HmN_000106500	1056		322.393	353.859	336.132	341.184	381.239	376.148	69.0895	64.0443	61.2795	81.9621	68.1795	72.3741	98.4541	85.7765	59.4471	50.2809	40.1113	44.3312
HmN_000106600	1713		6.82158	6.20211	7.07157	6.40305	6.70142	5.76513	3.6065	4.45839	4.454	3.77466	3.27507	3.24086	8.8348	6.22457	7.43129	1.65514	0.841058	0.81822
HmN_000106700	2736		65.4284	66.0965	57.6059	57.6723	59.1145	57.5453	63.3858	65.3788	64.6549	69.9538	77.48	63.9165	45.9225	43.332	49.8504	72.6964	66.9814	69.7049
HmN_000106800	801		8.82664	7.84412	8.97414	8.48832	8.76321	8.18576	1.65274	3.79087	3.70425	10.9554	7.67104	6.5843	1.57449	1.71339	1.54383	2.2525	0.899333	0.583275
HmN_000106900	3006		10.8454	11.6671	12.9751	11.9281	10.9701	12.2795	11.1079	11.4177	9.8236	10.8781	10.3537	8.1261	8.863	12.5379	12.3414	9.94646	8.96264	7.95769
HmN_000107000	1515		373.924	365.941	401.194	404.333	391.942	380.589	562.646	482.91	498.108	480.148	524.782	467.031	399.162	478.31	537.52	471.323	514.099	582.416
HmN_000107100	282		0	0	0.472044	0.227457	0	0	0	0	0	0	0	0	0	0	0.257949	0.30467	0	0.6627
HmN_000107200	4305		30.1774	31.8171	32.9467	32.3471	31.1495	32.2476	28.4279	27.3159	25.4356	26.9712	30.904	28.4565	26.787	36.2694	33.7603	23.7095	18.2392	18.0153
HmN_000107300	588		301.269	309.3	298.267	287.661	326.296	308.511	106.818	131.606	86.0239	93.7852	93.1398	108.735	91.424	98.3894	98.226	97.7523	104.625	142.704
HmN_000107400	420		175.351	211.07	197.773	210.755	225.099	204.297	251.46	201.337	225.729	150.653	231.214	295.645	258.99	448.929	299.973	227.066	238.75	242.946
HmN_000107450	294		213.093	209.438	228.426	226.245	249.447	250.003	19.0121	21.5953	24.9902	27.0202	21.354	20.1419	43.4331	18.3134	15.0927	11.3971	11.271	11.4417
HmN_000107500	564		113.866	103.909	105.03	99.8536	116.678	101.042	217.772	197.897	200.663	151.823	211.732	200.474	199.853	304.921	311.345	223.627	174.727	267.068
HmN_000107600	225		559.501	551.901	470.936	486.631	384.763	404.381	7.845	6.13431	6.90754	17.2427	10.0924	11.5144	9.45876	6.09966	3.87956	4.20038	1.92098	2.49175
HmN_000107800	369		0	0	0.180375	0	0	0	0	0	0	0	0	0	0	0	0	0	0	0
HmN_000107900	837		65.9335	66.7417	62.6617	64.2195	66.3042	61.8958	36.7295	41.9947	29.0346	37.1913	36.7055	35.5957	22.0365	19.5502	27.8974	53.0693	52.3276	51.5766
HmN_000108100	1119		16.3222	15.7219	16.1191	16.4513	14.31	15.553	17.3516	10.4431	18.1822	28.1489	26.381	24.8061	12.468	8.77401	7.99574	7.52444	7.33885	20.7924
HmN_000108200	1341		7.39585	9.62639	6.55159	8.56195	7.30635	8.39059	27.3127	20.8594	31.8194	7.37042	8.4668	11.5917	44.5547	32.435	43.9922	10.5074	8.59497	1.81168
HmN_000108300	699		5.33829	4.73952	8.66495	6.88228	10.2512	8.56961	30.9339	21.062	28.905	34.887	41.0857	48.7122	27.5148	33.227	36.3188	18.0683	21.0236	16.9771
HmN_000108400	1020		120.435	115.583	127.961	127.783	135.268	144.437	43.1187	44.4738	43.0798	103.782	117.468	102.959	59.1173	48.2315	34.0888	25.775	18.9273	21.4364
HmN_000108500	1020		69.7964	65.4074	83.1978	82.694	83.3689	78.3292	12.6904	14.163	16.2069	45.099	50.8113	63.9523	17.8511	16.0427	18.7559	9.09708	10.3111	5.67973
HmN_000108600	1023		104.532	104.524	118.478	115.808	122.006	123.123	17.9733	16.0104	14.2257	33.2284	50.14	38.1684	16.643	17.3372	20.6208	13.2697	10.7034	10.4127
HmN_000108700	873		3.037	3.92573	1.60106	2.71854	3.60146	4.45075	1.01095	1.15941	0.809225	12.1681	10.0985	9.0089	0.451449	2.05579	0.833238	0.88574	0.825161	0.428136
HmN_000108800	600		0	0	0	0	0.121863	0	136.797	130.814	79.3583	0.307905	1.78102	0.771056	130.846	152.726	104.142	101.668	54.5077	87.6785
HmN_000108900	1323		8.53559	8.20309	10.4642	8.87237	8.45583	8.07645	37.4683	33.8709	49.5532	8.30854	9.6926	10.4906	70.899	124.004	87.7519	10.3905	2.39577	1.48319
HmN_000109000	3246		29.2229	27.8031	26.7791	27.7636	26.6703	25.9852	27.5065	24.5202	27.3353	44.4214	45.3896	45.0376	25.473	25.0431	25.8831	24.0334	26.6309	29.4773
HmN_000109100	459		2.35329	0.497773	1.01505	0.978214	1.75228	2.11629	0	0.400935	1.23129	1.40871	2.32812	0.806333	1.37382	1.84002	0.475436	0.74873	0.62777	0.407149
HmN_000109200	3234		16.4875	17.1676	16.4235	17.7514	15.5325	15.3186	55.9448	68.3993	42.728	28.1341	25.1126	22.4879	31.4902	36.235	35.0888	49.361	41.6984	51.95
HmN_000109300	1521		23.8873	25.4615	28.3999	27.538	29.5645	27.7278	7.05973	7.25954	6.22385	15.4256	10.4507	10.6457	9.22452	6.45504	9.70846	5.98763	5.30447	5.22187
HmN_000109400	993		35.8966	36.469	30.5645	31.6516	36.2277	36.8464	16.1463	17.4207	23.9042	44.2787	36.5888	48.2667	21.0353	24.2399	28.7158	16.1797	16.9754	17.032
HmN_000109500	1434		27.2539	27.8029	29.6124	28.4483	30.6443	30.3132	17.6431	21.4316	20.297	31.2414	34.1858	35.1008	23.3061	27.902	26.9357	15.6975	14.8695	13.2928
HmN_000109700	591		49.3474	55.4764	62.8418	60.0186	53.6941	58.8962	34.3468	35.6537	43.5108	33.6038	37.7449	39.1399	50.6815	50.0168	36.9247	23.9869	25.353	29.7239
HmN_000109800	1674		14.6649	15.4912	19.9595	18.0474	19.2623	18.3753	14.2349	11.7629	16.4586	16.1126	18.1134	19.3455	18.0342	18.2258	17.7292	9.80294	7.83193	6.36335
HmN_000110000	345		0	0	0	0	0	0	27.7133	0	0	0	0	0	101.899	0	0	0	0	23.2925
HmN_000110100	1329		7.75818	8.0801	6.86116	7.62571	7.64741	7.67453	0.44272	0.623124	0.956822	5.83837	8.74426	5.08235	0.77103	0.476619	1.20415	0.84042	0.650443	0.773399
HmN_000110200	243		0	0	0	0	0	0	0	0	0	0	0	0	0	0	0	0	0	0
HmN_000110300	4284		9.28327	9.97323	10.0366	10.421	8.51679	9.80673	15.039	13.6604	15.666	11.3416	10.6636	9.43841	17.3506	30.2617	25.4868	9.44604	8.07133	6.93608
HmN_000110400	270		37.8238	1.69243	5.42326	55.5905	64.9938	71.0544	0	0	0	0	0	0	0.291937	0	0	0	0	0
HmN_000110500	1503		125.244	126.552	132.054	137.29	143.755	143.692	75.9446	77.6278	80.7509	73.2579	71.4539	73.1964	91.6193	103.113	104.829	69.7967	60.9651	56.4499
HmN_000110700	1026		0	0	0.84333	0	0	0.0788967	0	0	0	0	0	0	0	0	0	0	0	0
HmN_000110800	2061		15.3417	16.1298	15.9533	17.3351	15.2551	15.7497	17.4857	18.1261	13.4367	12.4148	10.8883	9.33797	16.3689	19.7722	20.9649	19.9264	18.315	13.6013
HmN_000110900	594		233.919	239.825	216.146	214.889	224.278	217.906	194.392	173.341	194.81	222.531	288.965	373.689	148.623	269.793	211.857	177.185	207.135	191.601
HmN_000111000	2493		22.8061	23.5535	25.4699	23.1563	20.5892	22.7616	22.598	24.5815	22.9534	21.4533	20.0927	15.0314	25.5471	30.0664	28.4197	30.7412	26.8729	29.0854
HmN_000111100	1233		21.7418	17.2331	18.7853	18.8319	19.2728	20.4176	21.8314	19.9253	19.0221	14.5337	13.4334	16.2841	30.1739	42.725	28.6129	12.8213	6.54347	6.51736
HmN_000111200	567		21.475	20.3494	17.0211	18.6659	22.8252	19.4161	5.70734	8.27645	10.7152	60.9293	73.5022	100.36	3.19741	5.58577	4.36194	3.48516	6.09833	5.76795
HmN_000111300	480		5473.42	5506.79	4845.3	4859.89	5091.15	5073.93	489.087	803.978	856.575	1149.25	498.684	555.16	2050.06	270.526	206.708	383.225	432.82	304.266
HmN_000111400	909		56.7141	59.6958	62.6775	62.8021	60.7306	60.5552	56.7986	47.1714	43.0556	60.4631	66.2738	57.9182	44.4843	47.6173	50.255	57.4669	51.6698	64.0413
HmN_000111500	846		5.33928	4.05102	5.82188	5.91388	4.58068	5.07121	2.78192	3.15417	2.33814	5.13174	2.84205	5.031	1.49074	1.74704	2.23556	2.03113	0.851496	2.6508
HmN_000111600	1110		2.12316	1.33793	1.55902	1.84916	1.6468	2.91705	1.06014	3.23295	2.16391	2.91261	4.09152	2.58408	1.27821	0.570655	2.68686	2.08987	1.81714	2.10452
HmN_000111700	2604		34.4291	33.7803	36.0907	35.0027	31.6733	34.0392	24.2332	24.3111	26.6412	23.8733	26.2125	19.0099	22.0365	26.7171	26.901	23.2609	22.961	24.5802
HmN_000111800	249		232.28	223.89	230.949	226.432	240.79	243.169	2.36295	6.28213	5.10689	9.64521	6.43741	7.06027	11.0795	2.1199	5.25844	1.03514	1.73582	1.50106
HmN_000112000	1119		4.7387	6.43168	7.13761	5.56019	6.46889	6.87227	15.5112	14.7191	15.1518	0.247644	0.596855	1.15762	42.2644	47.7381	29.2527	9.90462	5.15007	1.50307
HmN_000112100	2667		1.84095	1.67053	1.57224	2.1405	1.94652	1.51759	19.6346	19.0447	24.5285	3.60203	3.35568	3.5387	33.1311	33.5278	39.412	11.4362	7.07671	2.48755
HmN_000112200	1590		7.71984	10.7773	9.50234	6.77736	6.48405	6.87295	2.03526	1.96761	1.77724	4.53143	4.62056	4.01531	2.32999	2.2575	1.37248	2.80986	1.99347	1.41043
HmN_000112300	318		0	0	0.209303	0.201707	0	0	0	0	0	0	0	0.581929	0	0	0	0.810536	0.45306	0
HmN_000112500	2046		14.2063	11.6137	13.728	13.6374	10.0064	11.3549	7.40502	7.51048	10.3586	11.964	10.9681	12.3007	7.39688	4.85029	5.61739	8.39852	7.25295	10.9151
HmN_000112600	2628		78.729	78.5936	89.3268	82.6681	78.0149	81.3793	58.2106	54.2004	49.57	50.7199	57.1307	44.6438	49.9092	49.853	56.1617	52.2432	52.1909	49.9559
HmN_000112700	2241		27.5616	28.394	27.5321	23.5849	24.4053	23.9485	120.773	111.518	114.117	149.954	142.04	149.669	100.419	101.944	112.44	122.492	122.536	116.665
HmN_000112800	312		0	0	0.426655	0.616758	0	0.778347	286.644	568.898	143.102	0.888186	0.856257	1.4828	0.252638	1.35348	6.76125	996.029	954.023	240.191
HmN_000112900	861		0.456197	0.265363	0.46382	0.148996	0	0.376065	545.494	469.798	214.644	0.858271	0.775704	1.07464	0.366193	0.980916	4.98462	1610.27	1458.13	456.568
HmN_000113000	4038		10.8702	9.59063	9.88978	10.1504	9.95912	10.4042	6.08338	6.90452	5.7384	5.55875	4.03573	4.30783	5.77801	5.33346	5.71053	5.72353	5.13782	5.64624
HmN_000113100	678		97.3274	92.3347	80.8908	80.0367	90.8044	86.4401	33.8446	43.8359	42.5122	59.946	71.1224	54.1786	43.1318	29.2734	37.0146	46.2532	59.9242	51.4062
HmN_000113200	516		1.52242	0.442786	0.128989	0.372924	0.708508	0.78438	0	0	0	0	0	0	0	0	0	0	0.558423	0
HmN_000113300	951		544.159	543.686	549.473	535.401	543.734	541.526	299.137	401.149	360.135	524.506	434.719	496.394	278.823	268.535	323.628	386.671	356.471	420.336
HmN_000113400	507		0	0	0	0	0.288434	0	4.64201	2.54084	1.3934	0	0	0	2.33204	2.70695	1.1478	2.88084	1.70501	1.10581
HmN_000113500	1539		8.80513	7.42293	9.16851	8.29398	9.02692	8.46825	14.9101	14.7678	16.4334	8.70296	11.0229	7.99613	21.4087	37.3855	29.0683	10.8861	6.64665	4.97865
HmN_000113700	3264		15.8245	16.0998	19.5963	19.5927	18.6603	18.625	10.9509	10.8253	12.2937	12.9614	12.7274	10.0918	10.4325	11.9997	13.4385	9.79199	7.45967	8.96046
HmN_000113800	891		0	0	0	0	0	0	0	0	0	0	0	0	0.530795	0.118486	0.163281	0	0	0
HmN_000113900	573		29.8188	23.9244	26.7162	22.6123	26.542	22.6033	6.67441	6.90512	5.67135	10.6396	6.29416	9.20422	3.9893	2.39516	4.06236	4.04844	5.02873	5.05526
HmN_000114000	2022		25.6418	23.0512	29.1974	28.5185	26.7593	26.182	17.8229	18.7943	20.7534	29.7854	34.2198	34.9606	22.2981	26.5233	22.7363	13.4272	12.2555	7.71741
HmN_000114100	267		0	0	0	0	0	0.303176	1.65274	1.03387	1.58754	0	0	0	1.7713	1.97699	1.90709	0.643572	0.5396	0
HmN_000114200	486		0	0	0	0	0	0	1.51331	1.51464	2.61649	0	0	0	1.13531	3.69282	4.34055	0.353567	0	0
HmN_000114300	2655		0.147942	0.129083	0.401104	0.169115	0.0275398	0.0914667	70.0843	62.3135	80.7831	0.313123	1.40871	1.63795	169.195	250.786	142.524	29.2214	4.50398	0.703885
HmN_000114400	1068		0	0	0	0	0	0	5.3714	4.65243	8.59915	0	0	0	15.6465	21.8457	14.7799	2.81563	0.8094	0
HmN_000114500	777		110.834	112.328	109.474	105.914	132.591	117.203	40.1337	37.4217	46.7332	54.9235	63.4358	70.2584	42.8099	40.8969	46.9966	30.5187	29.4822	26.5771
HmN_000114600	1014		64.3022	61.4006	69.7745	73.6315	71.3875	71.5281	22.7749	23.775	27.1713	27.511	26.2147	30.6597	23.8646	22.2803	28.1211	21.691	17.6184	18.7987
HmN_000114700	324		92.1349	96.2568	106.411	99.1839	108.323	111.928	20.4297	18.4597	26.601	33.9265	20.2013	27.4153	67.3888	19.5502	14.5932	14.0543	21.3442	15.8618
HmN_000114800	1497		134.799	133.317	139.03	125.929	142.378	137.509	124.592	111.131	134.306	162.591	138.127	158.476	111.153	110.437	126.824	99.6337	97.5886	100.619
HmN_000114900	1182		61.2273	61.9519	68.9795	67.3989	66.6228	65.4022	70.9336	59.864	77.5784	67.5984	81.0272	71.3911	57.2834	86.9041	88.3116	72.9057	64.2357	81.0294
HmN_000115000	891		103.597	107.059	98.6048	104.313	92.4028	90.3965	213.294	222.343	248.329	174.479	159.812	154.419	215.68	205.218	210.877	290.343	267.611	345.552
HmN_000115100	357		1.3753	0.639994	0	0	0	0.226745	7.00447	6.95909	9.49853	0	0	0	13.2476	13.603	9.37288	2.88796	2.4214	0
HmN_000115200	1119		19.5691	19.7034	24.9816	22.0115	22.5431	24.3061	8.67578	7.48287	11.1113	17.8304	23.2773	21.7467	12.468	12.3591	14.0413	7.98512	8.62636	5.59475
HmN_000115300	510		66.0419	60.7034	74.5191	67.1614	77.8492	74.7579	53.9344	64.9515	60.9489	84.5832	83.5506	90.8939	84.387	95.842	96.1332	54.0771	54.8043	51.6672
HmN_000115400	567		67.0229	64.4734	67.2625	69.4598	62.8016	60.3898	20.2351	11.6844	18.1909	35.1891	38.8714	44.5499	18.3503	24.3912	26.4282	9.09173	15.4999	10.2175
HmN_000115500	4236		26.45	29.0452	28.3454	27.6347	27.7386	28.7217	15.0705	15.0317	12.8416	12.8657	12.8026	12.3631	15.3515	16.8475	16.3652	15.3944	12.8564	14.0955
HmN_000115600	2181		1.03554	0.680929	0.854484	0.617607	0.8046	0.482496	15.1747	11.0536	14.1874	0.0847055	0.306227	0.678784	34.6229	49.7602	27.0155	4.64841	0.924816	0.385588
HmN_000115700	624		0	0	0	0	0	0	0	0	0	0	0	0	0	0	0	0	0	0
HmN_000115800	354		58.2521	51.9561	47.5684	41.6747	38.0049	39.3307	50.2778	47.5669	68.2506	138.818	134.708	122.062	105.543	47.1193	34.316	49.5114	49.2453	46.1924
HmN_000115900	594		824.42	812.173	669.28	684.838	684.897	667.345	206.773	192.859	311.601	1065.07	1271.22	1244.13	226.915	217.54	262.556	225.206	212.472	121.913
HmN_000116000	225		3.055	2.03091	3.25396	1.71048	0.974907	3.59769	1.96125	0	0.627958	4.1054	5.93672	4.52353	1.75162	1.87682	1.61648	1.52741	0	1.24588
HmN_000116100	1290		6.92703	9.47563	9.90634	9.84518	9.40899	10.1028	6.38547	5.06437	6.13355	5.22722	9.837	8.17678	4.09391	8.34748	5.63889	3.72972	4.24402	2.60765
HmN_000116200	246		201.981	234.979	219.426	209.898	252.644	263.904	78.9284	113.709	138.419	156.205	76.019	145.184	234.226	91.8383	50.8601	62.866	74.9649	58.1156
HmN_000116300	3789		3.34319	3.34667	2.96868	2.60702	2.85602	2.39276	1.59167	0.874249	0.969532	2.14534	1.23388	1.02563	1.26899	0.473663	1.0175	0.975039	1.48294	1.0111
HmN_000116400	333		51.0149	46.6561	35.1779	42.184	36.6688	31.1152	18.5524	17.9608	19.0933	34.6739	16.0452	18.0608	26.9845	23.4602	14.1988	13.6744	11.249	12.3465
HmN_000116500	372		64.4084	64.7968	69.242	69.3157	69.187	82.4713	16.212	17.0672	28.8658	32.2803	21.5445	33.5782	46.8277	21.5683	14.4701	16.3981	16.6536	19.5924
HmN_000116600	2823		58.4378	59.5272	61.2534	62.1207	58.51	62.453	63.2561	71.2519	78.1278	83.1441	84.8869	72.0744	66.2862	69.371	75.5761	72.13	64.713	80.1346
HmN_000116700	267		978.286	1076.93	967.213	988.809	1080.61	1134.18	79.8824	98.2179	86.7853	105.518	63.5362	88.3682	185.987	45.8661	53.6708	64.3572	85.7964	64.7436
HmN_000116800	684		56.5634	49.2697	54.4921	52.1395	55.4799	50.1783	33.3327	29.9989	34.2898	22.4176	35.9328	30.9775	46.902	66.3678	55.3007	22.2329	13.9018	8.60638
HmN_000116900	1413		35.5119	35.9776	32.9258	37.7231	30.5305	29.5034	202.267	216.459	216.786	220.502	234.444	203.912	184.478	183.722	207.157	249.846	262.962	276.685
HmN_000117000	792		30.2524	32.5985	30.1697	28.6699	29.5426	32.093	48.1027	54.3723	47.8105	30.5572	29.6836	30.0244	37.3215	44.921	42.1571	72.6822	66.0335	81.8786
HmN_000117100	915		0	0	0	0.140203	0	0	57.2299	74.2151	29.339	0	0	0	0	0	1.19249	80.8463	61.0933	85.1689
HmN_000117200	834		0.235483	0	0	0.15382	0.0876715	0	12.1696	7.28174	4.40474	2.54741	1.92196	3.43924	1.70122	1.51901	2.61661	9.68367	5.52799	20.6152
HmN_000117300	3777		32.7581	30.3064	32.1601	33.1328	32.5808	32.1478	32.0904	33.3757	35.1263	33.8475	31.2986	33.39	32.5351	36.6159	33.7227	34.212	33.9489	38.445
HmN_000117400	255		0	0	0.783038	0	0	0	0	0.721684	0	0	0	0.36285	0.92733	0.414004	0.570523	1.01079	1.12999	0.366434
HmN_000117500	612		0	0	0.108755	0.104809	0.119474	0.132268	0.480699	0.751754	0	0	0.436523	0.151187	0.257592	0.172502	0.118859	0.842322	0	0
HmN_000117600	654		59.4584	55.0233	69.2043	66.0063	71.1056	64.7337	29.6887	28.2797	26.1409	37.9937	48.2018	63.5237	26.6359	47.62	41.7097	15.7646	20.9281	13.4303
HmN_000117700	1122		46.6477	55.0831	49.1178	50.1366	58.7812	52.5946	29.2352	31.8197	30.6004	44.5391	50.597	38.9239	31.6838	34.2494	38.5103	22.1301	15.7941	14.6574
HmN_000117840	1248		49.0195	47.6911	53.0652	56.2792	51.792	53.5762	30.9981	29.0495	29.5488	44.4093	41.9566	42.2598	29.8113	27.5771	33.3399	24.4395	23.2041	29.6495
HmN_000117900	3111		5.65	6.68321	6.11882	6.4947	5.85227	6.01061	11.6313	13.3097	12.0808	11.2235	11.2924	8.74408	10.7175	13.4721	15.8764	15.438	12.6429	13.7263
HmN_000118000	2253		62.3261	67.083	76.6616	73.1679	70.8138	72.4329	52.4262	51.0104	54.9986	61.5809	59.5846	60.3292	43.4874	47.7483	53.3375	49.8798	53.396	64.9481
HmN_000118100	1839		5.17947	5.03173	7.09375	6.59217	5.76515	5.63423	2.39957	4.80338	5.45494	4.01833	3.77703	4.47791	5.18629	5.28143	6.17059	2.61628	1.80189	1.87999
HmN_000118200	1272		383.444	384.299	387.681	398.775	380.421	383.931	293.609	306.643	290.579	233.906	223.047	221.642	291.373	331.404	352.957	272.002	280.331	305.592
HmN_000118300	3573		28.857	26.9851	29.0598	29.3876	28.6906	27.8209	9.75685	9.29675	9.1742	23.7844	28.749	23.5654	8.18453	10.0459	8.93748	7.47835	6.33067	6.79949
HmN_000118400	2397		7.70168	5.76675	6.27541	6.07444	6.61937	7.12559	17.7961	17.0824	21.1022	6.55116	6.46426	8.02901	34.6269	49.152	35.7184	9.82111	4.92866	2.18301
HmN_000118500	2655		50.5591	50.4286	53.748	53.8993	51.2515	50.4896	54.2945	52.2283	57.2613	49.056	49.0534	57.607	53.0534	62.945	65.8374	54.5596	53.7765	58.4224
HmN_000118600	1494		0	0	0.0445503	0.128801	0	0	75.1222	76.5557	46.3403	0.309141	0.357634	0.0619322	47.6948	51.4429	46.3035	78.0382	69.915	76.804
HmN_000118700	1512		0	0.15111	0	0	0.193434	0.107074	36.968	43.9991	25.137	0.122184	0.265032	0.12239	37.639	43.2199	51.5735	28.8662	35.0654	18.0454
HmN_000118900	1554		91.1823	87.7008	86.7741	88.6195	72.6946	76.885	18.4577	11.7239	18.4569	24.3114	24.0678	23.5187	16.2313	11.1414	16.8982	12.0527	11.4035	14.3107
HmN_000119000	1650		16.7231	15.578	14.9655	12.9063	14.8895	14.031	130.958	101.216	136.838	71.7698	64.1166	54.8431	93.1067	92.9666	103.47	169.855	166.339	259.256
HmN_000119100	1590		22.8507	25.2188	22.1442	24.1242	20.3259	21.077	57.2648	43.2295	53.1395	41.3057	53.8505	43.2955	32.8181	37.8462	42.4098	77.5953	74.8456	84.0966
HmN_000119200	1701		54.0917	54.198	57.0499	57.8832	53.3018	51.8715	238.411	217.027	194.617	159.871	177.395	142.19	134.801	140.824	155.875	340.536	335.832	404.8
HmN_000119300	723		0.407454	0.632027	0.368234	0	0.202263	0.111961	0.406899	0	0	0	0	0.255952	0.763155	0.292036	1.00611	0.356501	0	0.12924
HmN_000119400	2208		233.795	227.133	251.884	254.218	234.024	238.372	67.2181	67.094	69.7495	78.1475	86.2679	73.5017	74.0394	80.3737	77.5187	50.7407	48.2201	44.3928
HmN_000119500	267		0.367777	0	0	0	0	0.606353	0	0	0.529178	0	0	0	0.295217	0	0.272441	0	0	0
HmN_000119600	798		8.49066	11.023	9.09129	9.8063	10.2622	10.1439	4.6082	7.37962	8.8528	8.21851	8.20204	11.8267	4.74123	2.91048	7.01894	5.49092	5.41628	7.14271
HmN_000119700	2397		93.8539	91.4102	95.8805	97.1107	95.569	88.4114	39.9491	35.1245	41.7919	66.5136	64.0853	63.7303	32.5552	37.5246	48.191	27.5995	27.4082	21.9471
HmN_000119800	1704		2.36271	3.08391	2.49984	3.19961	3.69023	3.61036	20.2858	21.2757	23.7143	2.22255	1.41102	3.25798	26.2281	27.6319	35.5598	8.52109	9.55415	6.58033
HmN_000119900	816		81.8303	88.4791	94.2092	84.0303	82.9747	89.4794	49.0313	45.669	46.9237	56.6001	52.2191	62.5916	50.6167	47.8693	48.1379	41.1685	46.965	43.5141
HmN_000120000	1884		25.383	28.681	28.1212	29.6542	29.1851	33.6854	147.25	142.564	88.7941	32.8497	27.5802	28.534	98.0686	69.9885	72.51	151.814	134.973	182.071
HmN_000120100	1869		153.31	145.106	158.472	167.135	159.577	163.758	202.893	182.257	192.621	124.743	136.292	138.369	203.489	220.01	221.455	202.311	209.133	207.379
HmN_000120200	426		3313.09	3292.01	3114.49	3185.61	3375.27	3314.5	1152.93	1317.36	1273.94	1382.75	1252.67	1552.32	1278.93	1063.64	627.867	998.733	1525.96	1376.82
HmN_000120300	1515		30.9821	32.198	35.6295	36.1994	36.921	35.9057	46.2156	44.8837	39.0764	79.5065	84.0251	85.5643	30.2285	35.051	43.0208	48.8847	51.9234	55.9411
HmN_000120400	5520		10.9226	12.9347	12.2385	12.2824	11.9877	13.1981	14.7893	13.5855	13.054	11.3958	10.9136	11.2474	15.6504	16.9067	14.9173	13.2766	10.5967	12.2556
HmN_000120500	1062		0.184927	0	0	0	0.0688494	0.0762223	463.165	407.135	523.254	1.13072	8.67868	4.96612	995.976	1560.7	1219.76	145.136	152.891	6.24698
HmN_000120600	2205		47.0274	49.7885	50.8619	50.6743	48.6791	52.0931	28.9518	32.0069	24.7339	29.5337	32.2885	30.6744	30.278	29.828	24.0163	39.4321	36.5247	40.8936
HmN_000120700	3219		39.8703	38.1506	39.9473	40.9287	35.7299	36.9409	44.3246	43.2775	40.1179	25.5105	26.3916	21.7304	32.9348	39.7162	42.6643	64.1107	56.4387	64.3548
HmN_000120800	885		110.291	117.337	121.083	125.314	115.667	114.882	101.054	109.794	102.496	90.8058	80.2966	96.395	127.364	143.863	133.894	89.5088	85.7927	94.2854
HmN_000120900	1746		302.8	303.067	335.421	329.568	322.038	322.123	142.123	134.438	150.354	198.075	224.081	213.564	163.109	201.77	213.767	98.2188	80.2057	63.2571
HmN_000121000	1272		116.57	111.994	127.622	127.227	114.276	109.522	86.3829	71.9769	78.8651	117.788	130.321	108.166	69.28	74.1156	75.3723	85.1738	92.0845	63.9099
HmN_000121100	393		112.938	115.111	112.963	120.451	111.445	107.519	37.4285	39.1004	42.0636	66.0467	51.3232	48.2646	47.9356	30.0864	23.3218	40.6629	43.2586	38.9931
HmN_000121200	513		0	0	0	0	0	0	0	0	0	0	0	0	0.307302	0	0	0	0	0
HmN_000121300	666		5.30791	5.66048	4.69705	4.91184	6.697	4.98329	14.7977	16.7174	10.8196	16.9209	14.6412	14.0318	12.072	8.4013	7.31786	20.1247	13.4122	13.4689
HmN_000121400	303		820.248	806.459	884.587	856.297	968.633	961.492	32.0402	37.6562	40.5686	83.2257	46.7296	42.7516	80.3839	21.2536	23.7671	23.2514	26.6274	23.7457
HmN_000121500	5100		9.76187	11.7151	11.6151	11.2816	9.90678	10.3804	33.1971	37.3832	36.2092	25.864	27.7367	22.9502	22.5341	26.31	29.8812	47.0352	44.9169	53.3895
HmN_000121600	930		55.539	56.7509	62.6935	65.0395	58.2586	68.3271	33.0566	40.1698	45.1219	29.6979	38.2057	42.7812	46.1072	49.6071	46.9301	29.9323	26.4909	27.6303
HmN_000121700	1020		160.195	158.366	158.957	159.728	163.584	159.991	73.4027	71.6271	74.5239	70.6369	70.8477	69.5764	79.6731	79.9028	66.3946	82.8845	87.7151	84.7379
HmN_000121800	1248		184.04	181.244	199.355	201.012	187.424	195.884	123.757	122.244	117.176	148.253	143.316	150.578	98.213	119.444	134.001	148.427	141.303	157.232
HmN_000121900	1872		58.6451	62.6117	64.7094	61.8129	62.1035	57.1652	45.6525	45.9582	40.9079	34.2939	42.028	39.1953	61.8542	79.2347	67.7679	36.1199	29.8613	27.5031
HmN_000122000	1047		529.998	521.222	536.407	547.45	541.926	570.116	856.572	852.388	793.225	911.451	935.543	1013.99	732.821	808.874	1001.71	699.89	703.165	781.528
HmN_000122100	207		533.202	526.492	549.186	512.213	574.701	575.24	315.506	305.827	309.884	605.992	540.758	681.658	304.249	258.573	256.177	231.602	258.914	275.357
HmN_000122200	2214		51.1828	46.387	52.6694	55.7122	58.1576	57	113.343	102.031	110.786	70.6762	86.1548	75.6429	153.338	249.051	208.073	54.3674	38.1983	28.488
HmN_000122300	1620		10.6682	14.4562	11.9969	13.2245	13.3598	15.3402	12.5302	13.1774	15.3501	19.3296	16.9032	14.9071	23.9875	27.1748	24.2472	13.1527	10.1385	5.53723
HmN_000122400	318		397.109	396.962	454.814	463.321	515.965	500.962	20.8152	43.9819	45.764	105.152	57.547	82.6339	77.8315	14.2753	26.306	16.7511	17.2163	11.7535
HmN_000122500	2838		8.02733	8.21167	6.87158	7.11945	8.01258	7.01664	1.50307	1.42658	2.98712	2.47365	1.17668	1.95617	3.61064	1.52516	2.5375	1.1504	1.01531	1.02067
HmN_000122600	597		19.5735	22.0058	23.301	20.6289	23.7603	21.2878	13.305	8.63119	12.3067	13.7706	14.991	18.9083	4.75315	7.78078	9.86948	5.32483	7.48119	8.60844
HmN_000122700	1716		22.489	22.0356	23.0782	23.7732	24.2022	22.69	90.7764	76.8398	110.826	8.98952	12.9995	14.2349	236.331	280.908	181.812	61.7339	42.4831	9.96483
HmN_000122800	264		0	0	0	0	0	0	0	0	0	0	0	0	0	0	0	0	0	0
HmN_000122900	282		0	0	0	0	0	0.28705	0	0.978879	0	0	0	0	2.51563	1.1231	1.28975	0	1.53269	0
HmN_000123000	2250		52.6769	50.7221	57.4176	56.6453	53.2949	52.958	57.9877	58.3986	46.0922	59.1177	61.8012	52.0617	34.0515	34.9558	40.8	81.3346	73.3813	88.4987
HmN_000123100	513		53.2136	56.34	52.9352	57.0159	52.7362	50.6517	111.252	118.381	129.723	100.114	67.1787	82.2459	112.934	74.085	67.7788	127.619	155.026	157.556
HmN_000123400	444		0.442326	0.257295	0.599624	0.288932	0.329361	0.364631	0	0.414481	0	0	0	0	0	0	0	0.387013	0.648978	0
HmN_000123500	927		40.6768	48.4314	49.9725	45.9448	47.2467	48.9007	22.6908	15.5839	18.8997	17.9362	27.234	23.1566	31.4612	59.4478	40.4121	8.89754	6.52759	2.51998
HmN_000123600	2415		25.0472	22.3274	26.9816	27.596	27.582	25.6755	14.8007	11.0494	13.1637	21.7254	21.6266	20.6509	9.46529	16.2182	14.6086	9.4633	9.0083	11.298
HmN_000123700	1551		285.915	281.583	289.706	285.893	291.294	279.639	238.707	222.235	231.841	235.068	230.895	232.719	195.203	196.576	200.356	224.292	248.482	283.395
HmN_000123800	2271		15.3067	16.9019	17.6727	18.7542	17.9012	17.4657	15.1563	21.7172	17.6069	21.232	22.9979	18.7416	20.9986	18.8736	17.3927	16.457	18.0805	18.2273
HmN_000123900	483		0	0	0	0	0.302766	0	4.26359	4.38165	12.8712	0	0	0.383133	66.5834	21.6388	6.62657	2.31246	1.78973	0
HmN_000124000	870		0.451478	1.57571	0.459022	0.29491	0.168087	0.186088	0.338147	0.846112	0.324806	0.743218	2.91718	1.06353	1.35902	1.82019	1.83945	1.18506	2.81522	3.00729
HmN_000124100	759		90.3044	86.3941	87.0781	80.3687	85.5452	77.7485	50.1941	55.6452	49.8892	63.4064	57.7246	58.393	71.2419	85.9591	82.3256	55.5799	41.7603	52.445
HmN_000124200	819		154.668	158.874	152.539	157.264	134.452	144.204	140.808	138.64	150.089	184.63	208.764	198.045	139.841	132.898	141.575	144.873	157.091	165.09
HmN_000124300	6969		22.432	21.9495	23.4659	24.5932	23.2501	22.8592	12.7486	12.7017	11.9415	13.7848	14.9504	12.9981	11.9665	13.7853	13.5588	13.7092	13.0036	12.4695
HmN_000124400	429		72.1022	79.621	74.781	73.5624	84.8783	86.2314	36.002	45.9001	45.4501	55.1214	26.4661	28.6854	142.947	35.4365	28.9949	20.4278	22.5009	20.692
HmN_000124500	3147		32.2641	30.7105	33.5858	31.7147	29.8792	28.2688	25.1466	24.356	22.3587	20.7814	23.6846	20.8163	21.3651	22.7781	26.1657	26.2091	24.1724	24.9116
HmN_000124600	1254		0.156613	0.0910996	0.212307	0.613807	0.291539	0.0645519	0	0	0.112672	0.220984	0.10652	0.0737852	0.125715	0.6735	0.348046	0	0	0.149028
HmN_000124700	1785		75.2014	76.8632	80.3919	85.8113	83.7683	79.7236	52.8219	55.2604	46.0679	76.1223	70.193	69.9782	43.8936	52.2237	61.6573	49.7692	46.2487	52.0337
HmN_000124800	852		64.427	69.8573	70.4642	62.7125	64.9652	59.2859	59.39	62.3151	67.992	56.919	58.0084	59.9469	95.7533	134.318	97.5866	37.0088	39.0621	43.7592
HmN_000124900	756		86.5063	84.9236	91.9137	91.7175	91.3009	94.9748	50.7824	42.2342	47.6576	59.3816	70.6752	70.3741	41.8096	52.5063	66.9686	33.0712	36.7806	35.1021
HmN_000125000	213		489.599	514.343	390.6	412.261	364.56	380.418	8.28698	7.77589	7.2967	22.1171	8.77965	10.4255	8.88147	7.93022	4.43963	4.43702	3.382	4.38689
HmN_000125100	2106		130.928	130.133	132.516	130.814	135.439	133.876	77.3884	65.5375	66.1503	29.7378	36.1531	32.9072	118.571	100.909	111.772	56.6659	93.586	36.2937
HmN_000125200	3126		8.23015	8.99001	10.6459	10.0339	11.7653	10.2545	9.64627	6.85842	8.13574	2.6299	3.71757	2.30873	10.2626	9.76009	12.0538	8.32783	10.0473	4.27448
HmN_000125300	1227		126.287	138.911	135.991	138.898	149.394	141.775	59.1013	56.3937	71.0484	90.414	103.965	112.284	67.8379	76.9198	75.5873	51.186	48.6115	51.5561
HmN_000125400	2178		6.13164	5.45493	5.50068	6.36128	5.74067	5.90943	8.37449	8.53396	11.1579	5.93755	6.25563	5.52271	13.1372	18.3707	14.1943	8.16565	5.95344	7.29335
HmN_000125500	2337		44.1611	39.2039	45.7392	46.7142	47.6503	46.83	39.1495	40.6723	45.1622	51.66	59.5577	56.8938	44.0829	51.2722	64.3999	27.7198	26.324	21.7908
HmN_000125600	948		73.5437	68.0854	69.4368	70.4354	68.4132	67.1152	0	0.0970619	0	2.63083	1.54993	2.53765	0	0	0	0	0	0
HmN_000125800	249		4.33799	5.0467	3.74223	2.83362	3.81741	6.17676	1.18148	0	0.567432	0.370969	0	0.371593	0	0	0	0.345047	0	1.12579
HmN_000125900	1446		35.7201	28.2832	32.4046	33.0473	40.6549	36.4994	16.0725	18.1357	19.4446	26.8299	29.1909	29.4345	19.0244	21.5377	19.5185	16.0426	19.6282	23.9741
HmN_000126000	1665		78.793	86.8627	79.1503	78.628	77.6852	74.3847	50.0031	47.085	47.7758	70.8458	72.2836	60.8509	46.7731	51.7394	46.878	43.2422	42.3999	48.881
HmN_000126100	1074		5.21154	3.08466	2.85072	4.3598	4.42521	3.69316	583.582	511.05	400.455	2.4942	5.47239	5.42754	372.905	515.568	497.068	473.023	301.024	442.495
HmN_000126200	1155		0	0	0	0	0.253223	0	778.769	594.63	557.334	1.03968	6.01382	4.32592	716.163	1006.63	1051.13	476.002	248.978	181.137
HmN_000126300	1128		0.0870535	0	0.177017	0.39805	0.259284	0.717625	166.785	129.62	122.251	0.409448	1.65786	1.39446	178.26	167.997	197.396	93.7621	121.594	78.1158
HmN_000126400	2949		12.2537	14.1782	14.5124	14.0292	12.2235	12.6267	22.4456	24.0567	20.2665	14.6278	14.4039	13.617	20.8751	22.0164	20.7692	38.5154	41.6244	29.4042
HmN_000126500	252		9.35204	9.97323	10.8289	12.2177	9.28483	12.2065	11.6741	8.39816	3.36406	12.4628	20.1424	26.8034	9.38369	7.12186	3.46389	10.2282	9.1475	11.1239
HmN_000126600	666		102.915	85.9364	84.7468	83.3087	87.6099	85.9314	7.28843	8.56593	14.2139	37.1705	45.3276	49.1808	12.072	10.9375	9.39307	9.1593	6.92243	7.01507
HmN_000126700	651		0	0	0	0	0	0	35.7002	26.1486	58.5998	0.283783	0.410372	0.14213	112.968	124.058	72.63	24.2837	6.41801	0.430602
HmN_000126800	579		0	0.394607	0	0.443129	0.252567	0.279613	36.3289	51.0133	36.6038	0.319072	0.692104	0.639217	148.661	47.9537	26.6343	14.2453	13.188	35.0201
HmN_000126900	2232		17.7299	16.3783	16.729	17.5301	16.7398	17.2994	14.169	12.45	11.7742	10.6773	11.4306	9.28583	17.7634	23.3656	16.9144	9.58481	9.81143	10.5916
HmN_000127000	516		0	0	0	0	0	0	0	0.178323	0	0	0	0	0	0.204595	0	0	0	0
HmN_000127100	3126		1.94759	1.75415	2.40598	1.78517	1.77766	1.78676	0.941099	0.765317	1.62715	2.95494	3.33299	2.48632	0.655598	0.641667	1.02388	0.3573	0.368709	1.19566
HmN_000127200	2961		36.3801	34.6073	40.7307	39.9674	40.2507	38.9021	28.8624	29.3975	26.9125	26.9845	28.4656	29.8735	35.272	43.3551	37.9308	18.9475	16.3001	12.3073
HmN_000127300	303		3.2408	4.52431	4.17362	2.54031	2.41314	2.93871	133.501	157.609	188.388	244.799	122.114	146.882	380.328	105.92	65.2995	96.9754	145.5	102.692
HmN_000127400	1518		7.63318	6.09575	5.65613	6.59176	5.87642	6.18575	17.8296	17.9423	19.7323	14.9693	11.9673	17.0668	24.7685	22.3939	25.2535	13.6969	12.2434	11.2646
HmN_000127500	867		41.4531	49.9383	50.053	50.826	45.625	50.5108	31.5565	30.247	25.5855	29.0858	25.8833	32.0162	24.7288	23.2573	26.4286	35.5757	34.5643	39.1222
HmN_000127600	858		97.2808	83.0828	84.7105	84.7762	101.411	95.0055	41.488	36.7844	20.255	0.861272	2.33525	1.72544	20.4866	14.6421	13.8192	33.1451	28.546	57.1753
HmN_000127700	882		0	0	0	0.218173	0.165801	0.183556	9.67284	14.6055	5.12619	0	0.151447	0	0.0893685	0	0.577315	7.98773	7.18732	16.1032
HmN_000127800	786		3.62302	1.7441	1.27019	2.52981	1.11631	1.75079	9.16997	9.24829	7.37012	23.8567	32.9692	30.8422	5.41532	5.6412	7.86647	5.90268	6.59877	7.48952
HmN_000127900	1998		0	0	0	0	0	0	8.31912	7.46065	10.1124	0.554783	0.40113	0.324168	13.4922	16.9611	19.8055	2.75209	4.83128	1.16918
HmN_000128000	432		0	0	0	0	0	0	17.7057	12.1408	26.1649	0	0	1.92764	96.5217	45.2098	12.292	4.57428	2.00102	0
HmN_000128100	825		17.7349	19.109	20.3305	21.692	22.6001	21.6843	29.2405	36.6943	29.1144	22.8409	18.134	22.4307	29.4273	26.6167	22.1311	23.9526	27.2429	28.2021
HmN_000128200	534		250.272	268.697	258.007	255.731	285.9	293.171	160.04	222.283	259.033	281.958	215.623	309.808	212.852	208.968	137.583	126.301	140.566	127.562
HmN_000128300	1530		1.02689	1.56798	0.696034	0.419234	0.716844	0.687794	25.477	23.575	30.2898	0.422614	1.48418	0.36285	37.8144	36.9154	54.9129	8.08629	5.08494	1.03823
HmN_000128400	1386		12.7528	15.8253	15.0308	13.93	16.1429	17.054	82.6739	76.4797	115.092	10.7967	14.2635	16.0219	202.403	269.945	172.932	34.5899	13.8252	4.92148
HmN_000128500	4527		13.1015	10.8763	11.5856	12.9504	11.2253	10.6035	19.2356	20.9762	20.5678	18.8946	17.999	15.7992	13.9991	13.5491	13.8992	26.1337	24.8874	31.7455
HmN_000128600	3183		18.2017	16.6531	17.8994	18.1164	18.1934	15.8183	15.1114	14.9744	13.9382	19.9949	21.0247	18.4298	16.3936	19.635	18.0769	12.4165	8.41898	7.07484
HmN_000128700	741		14.047	12.796	18.9525	15.4947	18.5509	17.1509	81.3879	107.04	87.1388	98.9782	84.9047	87.0325	63.7179	78.6441	75.883	133.571	123.852	116.265
HmN_000128800	846		0.464285	0.135034	0	0.227457	0.086428	0.5741	1.21709	3.48046	2.33814	27.9516	15.3155	19.7959	1.49074	0.124789	1.37573	0.406226	0.340598	0.6627
HmN_000128900	414		0	0	0	0	0.353227	0	0	0	0.682564	0	0	0	0.380788	0.255003	0	0.415057	0	0
HmN_000129200	843		0	0	0	0	0.173471	0.288071	1.22142	1.63727	1.00563	0	0	0	2.33757	3.00558	1.12176	0.407672	0.683621	0.221686
HmN_000129300	327		0	0	0	0	0	0	0	1.40695	0.432082	0	0	0	0	0	0	0.788228	0.440591	0
HmN_000129400	216		0	0	0	0	0	0	0	0	0	0	0	0	0	0	0	0	0	0
HmN_000129500	1563		114.028	120.086	116.253	119.545	119.618	117.564	108.132	109.264	119.595	110.278	109.391	109.931	113.923	107.868	116.117	103.287	105.359	98.2831
HmN_000129600	603		65.6271	59.8665	65.1233	67.8659	77.8471	75.9811	31.4678	25.9411	33.0381	47.641	48.5127	56.3139	36.8625	40.2676	36.4312	22.7972	21.2645	20.9196
HmN_000129700	1056		62.3026	64.3675	59.7511	60.9236	69.8638	68.1466	39.2807	38.4266	40.5408	43.0367	37.8213	38.9033	47.6969	47.587	48.0812	31.4052	29.6059	31.9433
HmN_000129800	504		69.1661	61.4261	61.1438	56.6341	65.5741	73.5599	23.0564	23.7339	34.2013	33.1731	31.8038	29.7407	55.3638	19.2709	20.3504	18.9222	11.4344	9.82611
HmN_000129900	801		0	0.14262	0.166188	0	0.182567	0.202118	173.721	167.258	223.49	0	3.00171	0.808598	340.189	360.734	386.957	96.5358	78.6017	12.1321
HmN_000130000	972		27.9839	30.3227	27.5956	22.5028	25.1249	18.9878	304.629	234.391	297.699	581.218	681.486	709.181	266.717	339.63	370.968	303.095	420.065	354.344
HmN_000130100	462		0	0.24727	0.288131	0.277675	0	0.175212	3.18385	3.58499	2.14077	1.99938	2.31301	4.00548	1.19429	2.5136	2.51919	1.30177	4.98955	2.83154
HmN_000130200	4203		5.28013	6.65918	6.54022	6.36392	5.35816	6.41344	4.02469	3.02118	4.16846	5.23064	6.16554	4.75512	4.20089	4.14448	4.44792	3.80217	2.74229	2.46774
HmN_000130300	570		0	0	0	0	0	0	22.4512	30.0258	33.9593	0.32411	2.1091	1.7856	228.587	38.8946	16.335	17.4848	19.968	10.8195
HmN_000130400	915		0.858547	0.374554	0.872895	0.49071	1.03884	0.265403	28.1327	18.1012	35.0524	0.706666	0.29197	0.404488	89.505	105.917	51.3564	20.9393	9.76233	0.714847
HmN_000130500	429		0	0	0	0	0	0.37738	0	0	0	0	0	0	0	0	0	0	0	0
HmN_000130600	210		0	0	0	0	0	0.385467	0	0	0	0	0	0	0	0	0	0	0	0
HmN_000130700	438		1.12096	0.782458	0.455878	1.75734	1.00162	1.10888	5.37329	5.25198	4.19356	4.21787	3.96459	4.01371	4.49903	4.33854	5.97877	3.92314	6.24975	7.89339
HmN_000130800	2442		26.1374	27.0393	29.7086	25.8988	26.4087	26.5186	48.5494	52.0361	41.6003	44.1053	48.6278	35.4269	33.0527	45.0904	45.188	36.344	30.207	49.2458
HmN_000130900	852		248.027	263.876	259.046	258.905	261.921	257.666	259.141	238.353	294.024	436.162	406.373	462.633	247.016	266.406	292.333	171.43	182.459	152.993
HmN_000131000	1887		59.688	61.5691	68.6745	66.0464	61.8036	65.8481	84.3431	81.0919	72.2552	58.1054	65.8324	51.3874	103.051	120.285	105.393	71.9844	59.5533	65.2649
HmN_000131100	3186		68.5155	67.6613	75.9173	71.4108	70.9149	70.0483	37.7661	36.8232	37.4735	39.3724	47.7118	34.7919	42.5535	65.8742	52.9466	25.349	22.2034	20.7939
HmN_000131200	282		0	0	0	0	0	0	0.521609	0	0	0	0	0	0	0	0	0	0.510898	0.33135
HmN_000131300	2193		11.1495	9.94967	12.0491	12.8695	12.6365	11.5166	11.738	15.7763	11.7903	13.9421	17.2985	13.7545	9.2733	10.5908	15.0923	13.0854	11.1685	8.64955
HmN_000131400	1263		86.7673	85.3852	79.3113	80.0897	72.4233	78.2562	41.4611	59.7403	63.6535	73.5022	76.571	81.5378	45.6212	45.4716	61.7988	54.3528	49.7355	43.5021
HmN_000131500	1317		39.8154	32.8751	41.1883	37.9402	38.3079	42.4101	42.665	39.6844	36.4759	34.3675	30.2245	34.4253	42.7332	43.4469	38.0002	51.2109	41.3513	54.4893
HmN_000131600	2115		21.5428	24.0361	24.2001	23.4736	22.1256	24.0356	26.15	26.234	27.5901	30.2227	28.5468	29.2673	22.3239	21.5635	23.7657	29.3295	26.6348	32.5607
HmN_000131700	1893		0	0	0	0	0	0.128285	24.6322	16.3322	26.5713	0.195185	0.776195	0.195513	36.7258	36.25	46.4194	10.8474	4.49039	0.641695
HmN_000131800	591		28.246	27.0617	25.9025	26.0479	23.2592	25.8869	61.2269	61.3431	71.7211	17.9741	16.2732	15.0297	156.979	180.418	110.897	52.1897	43.8802	32.2536
HmN_000131900	3288		3.04624	3.43967	3.82588	3.74557	3.95834	2.83121	3.22103	2.7985	2.2775	4.83208	4.30629	3.34875	2.94867	2.7934	3.4955	3.63213	2.54144	3.26815
HmN_000132000	507		32.1511	40.1075	37.4144	34.918	40.8134	32.4112	21.4693	29.5826	44.5888	46.459	32.6695	38.8722	32.3376	23.9461	19.943	17.7934	27.8485	15.8499
HmN_000132100	363		0	0	0	0	0	0	0.810434	0	0.778461	0	0	0	2.17143	1.74498	0.20039	0.236685	0	0
HmN_000132200	258		0	0	0	0	0	0	0	0	0	0	0	0	0.611031	0	0.281945	0	0	0
HmN_000132300	516		99.3382	89.8856	99.1924	94.8469	90.264	94.5963	230.618	217.732	197.424	179.551	185.35	207.109	115.332	131.145	110.099	411.269	469.075	400.564
HmN_000132400	2223		65.7735	64.8022	71.199	69.1346	61.3758	68.4581	73.7785	67.2622	50.8468	62.2458	55.4014	54.5254	47.8328	49.4375	52.323	142.538	143.101	80.9567
HmN_000132500	3921		9.09087	10.2264	9.62472	9.5699	8.76447	10.343	15.4184	12.6019	13.5489	9.54104	7.66504	9.60427	14.4539	21.4319	18.9043	10.4301	8.48786	7.17308
HmN_000132600	3024		31.758	33.773	36.9548	35.041	31.699	35.1203	28.3097	31.554	24.9969	27.0027	26.1057	21.357	23.8242	23.7395	26.2438	31.5653	25.9179	25.5541
HmN_000132700	2124		76.6986	71.3724	67.0283	68.1895	63.9267	63.3788	80.8878	80.2746	70.5123	104.983	99.1759	84.032	60.8615	63.9192	69.2827	81.5886	75.6995	85.478
HmN_000132800	948		10.669	11.5685	10.8122	12.6527	9.17832	10.4174	54.6171	44.7455	53.2076	12.0823	12.1177	18.3492	83.0635	80.8488	105.813	19.8479	21.2766	4.23834
HmN_000132900	2919		79.9969	82.5776	82.337	80.8873	75.2723	75.3463	108.342	102.985	120.574	156.674	168.034	142.356	84.6018	93.8892	110.894	109.994	114.804	110.631
HmN_000133000	9168		15.4449	14.2923	15.7393	16.2456	14.874	15.1336	15.3223	12.3148	13.1921	9.39029	9.80549	9.08312	13.5069	15.5685	15.9162	15.4347	13.1218	17.1023
HmN_000133100	321		0.305908	0	0.207346	0.199822	0	3.0261	0	0.85995	0	0.575523	0	0	0.245555	0.657764	0.22661	0.267654	0.448826	0.873278
HmN_000133200	1029		27.7698	22.6479	21.6686	22.5653	18.9013	21.004	36.4518	35.5003	36.1122	35.5482	37.905	30.5725	38.6072	31.9073	34.2148	42.2487	37.5234	48.3095
HmN_000133300	888		458.36	476.253	481.198	468.72	470.409	463.355	130.529	153.254	136.358	184.535	168.023	165.048	124.093	114.606	121.564	108.847	110.975	116.906
HmN_000133400	876		223.632	211.916	223.304	228.6	237.3	217.617	203.513	226.57	234.839	214.057	209.056	228.254	238.719	199.934	207.43	284.918	289.462	312.749
HmN_000133500	2964		3729.64	3723.75	3577.75	3598.04	3371.72	3381.33	2856.82	2629.65	2393.36	2582.66	2912	2620.78	2201.89	2716.82	3266.68	3182.6	2841.02	3215.67
HmN_000133600	1161		214.916	216.67	209.936	199.335	204.05	209.865	189.79	176.738	162.344	141.779	144.391	133.889	141.012	148.036	151.248	173.166	169.637	250.785
HmN_000133700	354		1090.15	1158.52	1080.91	1089.52	1268.83	1266.36	396.405	455.915	644.988	778.372	596.942	815.751	804.039	393.655	224.184	314.543	371.986	316.748
HmN_000133900	420		0.701403	1.63198	2.06014	1.22177	1.56682	1.1564	0.350223	0.219083	1.00922	0	0	0.220302	0.375348	0.50272	0	0	0	0.222478
HmN_000134000	228		0	0	0	0	0.96208	0.710071	0	0	0	0	0	0	0.69143	0.463031	0	0.376828	0	0
HmN_000134100	1086		8.31866	9.04654	9.25441	8.68232	9.76254	7.30471	46.0515	37.1956	26.2806	10.462	15.2518	13.0355	32.1534	27.4135	25.5869	24.0504	18.0423	48.4412
HmN_000134200	459		0	0	0	0	0	0	1.9228	0.601403	3.07823	0	0	0	5.32356	3.22003	2.69414	0.187183	0	0
HmN_000134300	1368		113.557	109.479	110.687	106.201	104.546	104.617	52.257	69.6836	78.8047	90.8184	81.044	84.1398	63.4387	62.6635	58.8102	73.7327	78.2503	78.8235
HmN_000134400	882		47.3168	39.3748	45.655	42.7619	47.8335	40.3823	27.5176	24.8294	28.3542	26.9155	16.5077	26.3313	27.0787	21.6648	21.1957	26.2037	22.8688	24.3666
HmN_000134500	321		639.041	578.668	513.597	484.369	536.882	537.132	2.29118	1.7199	3.52126	2.58985	0.83225	0.864735	8.83996	1.31553	3.17254	2.14123	4.03943	1.45546
HmN_000134600	1413		2.08485	1.77867	1.27181	1.40724	1.19017	1.89051	0.624602	0.846561	0.999934	1.24208	0.283601	1.04772	0.725194	1.046	0.720725	0.364827	1.01963	0.595164
HmN_000134700	747		0	0	0	0	0.391529	0	0	0	0	0	0	0	0	0	0.194757	0	0	0.125088
HmN_000134800	303		0	0	0	0	0.241314	0	0	0	0	0	0	0	0	0	0	0	0	0
HmN_000134900	1803		13.4523	12.2919	13.2157	15.0129	14.7615	13.424	5.79238	6.1241	4.62349	9.73409	14.9653	14.0612	4.24062	5.97241	4.35724	9.81634	10.5478	8.8621
HmN_000135100	1008		3.50701	3.05997	3.23547	2.16355	2.97405	2.24856	33.8549	48.2894	39.2474	54.7081	37.502	52.3216	30.0278	29.5348	28.5049	43.1289	40.8779	40.7876
HmN_000135200	258		0	0	0	0	0	0	0	0	0	0.358029	0	0	0	0	0	0	0	0
HmN_000135300	1131		0	0.202014	0.117698	0.17014	0.258596	0.143144	162.05	126.591	67.5847	0.980068	1.18104	1.55438	180.714	84.1022	49.2019	61.1521	9.55392	127.562
HmN_000135400	1734		49.8344	47.1054	53.853	55.006	49.7152	50.6976	54.8845	55.1876	47.2598	28.4466	29.7349	25.6663	40.1843	50.7155	49.2915	107.421	87.9062	68.5447
HmN_000135500	1548		63.815	54.6841	58.045	53.9082	55.5943	55.0112	87.135	87.5566	91.4556	56.2702	48.581	56.1854	93.0804	102.911	102.205	77.9801	77.5277	98.994
HmN_000135600	678		16.9454	21.0617	26.1128	25.8274	26.5296	26.9827	113.032	101.243	132.538	17.1664	25.809	28.6587	257.279	346.765	252.236	42.3248	14.2373	15.5735
HmN_000135700	669		0	0	0.198978	0.0958787	0.109295	1.33098	0	0.412622	0.63359	0.552295	0.399331	0	0.589111	0.946826	0.434928	0.385277	1.29214	0.419017
HmN_000135800	321		0	0	0	0	0	0.504349	0	0	0	0	0	0	0	0	0	0	0	0
HmN_000135900	372		0	0	0.17892	0	0.196554	0.217602	0	0	0	0.24831	0	0.248728	0	0	0	0.461918	0	0.251185
HmN_000136000	2340		8.56071	7.5671	9.01665	9.56661	8.53044	7.88725	16.5952	14.628	13.646	9.43451	11.588	10.5575	19.0994	26.8439	17.4704	9.43616	6.03383	6.10959
HmN_000136200	783		45.1478	38.2255	33.9166	43.663	35.0182	46.6253	25.1731	25.7359	27.0672	22.0606	26.2717	30.1332	39.4618	55.954	41.0624	20.8483	24.6562	20.2873
HmN_000136300	756		0	0	0	0	0	0.107074	139.895	125.242	58.4973	0.244369	1.06013	0.734339	99.4671	38.4022	43.2024	51.3683	28.0142	134.352
HmN_000136400	3480		25.3674	24.4891	26.3173	24.7356	23.9525	24.5636	26.5868	27.1285	27.6897	32.2504	29.095	27.5187	21.8349	22.631	23.1394	35.5024	34.4451	33.2144
HmN_000136500	1299		117.548	109.314	109.649	113.028	104.696	107.121	109.613	125.095	118.884	139.375	132.445	147.017	110.134	113.292	116.644	97.0285	101.816	115.308
HmN_000136600	1590		104.002	104.396	113.986	111.06	114.322	113.124	10.4538	11.8057	7.731	13.5362	13.9457	14.5482	8.87379	7.56925	8.55516	10.0506	10.6922	11.2834
HmN_000136700	1557		26.993	25.2397	24.238	22.3285	19.5827	22.4596	6.14072	7.03259	1.72416	3.14431	4.97586	3.98156	3.4425	1.42389	0.934383	11.6984	8.69806	7.86174
HmN_000136800	2520		77.6998	78.7432	81.0056	83.1312	88.1189	75.6479	30.1192	27.0202	32.9678	59.9314	79.8277	62.8227	25.7426	33.3471	38.0162	18.5471	21.7825	23.3973
HmN_000136900	396		0	0	0	0	0.553925	0	1.11435	0.697081	0	0	0.337314	0	0	0	0	0.433923	0	0.471923
HmN_000137000	3663		59.0304	56.3865	64.1416	63.4424	62.1394	58.4072	54.5729	56.3442	59.3629	68.7175	72.7868	66.0039	88.1621	111.998	82.6114	38.4667	26.7458	21.2748
HmN_000137100	786		49.348	56.8288	53.8563	53.8604	55.2572	53.9654	78.5998	73.8693	97.4294	199.55	198.495	221.311	75.5137	79.2455	74.6852	87.5565	90.3665	101.762
HmN_000137200	1617		99.4109	106.468	122.209	119.757	110.921	110.384	18.7392	24.5828	20.3591	88.544	100.038	88.7501	19.0599	17.5625	16.1498	14.8242	11.1374	13.9843
HmN_000137300	2688		33.4262	33.7022	35.5076	35.7463	34.0293	36.3483	53.1902	63.0547	58.398	32.3369	30.4124	29.2588	66.4776	77.2539	74.3383	61.7847	51.5083	31.2512
HmN_000137400	1218		193.571	185.427	180.494	186.372	186.637	182.432	144.437	124.273	135.955	168.058	202.338	176.621	131.372	157.317	170.985	136.917	134.847	144.074
HmN_000137500	1041		28.393	29.1907	31.0094	30.9315	31.7477	32.5814	39.4228	31.5555	35.2887	13.31	16.681	15.11	37.935	61.355	53.8051	29.2167	20.0678	21.2732
HmN_000137600	2127		10.0182	10.6881	11.5155	9.34851	11.8254	9.0196	2.21298	2.7254	2.52423	8.25132	7.91283	6.30765	2.59408	3.47437	3.00953	2.90833	2.84489	2.50405
HmN_000137800	906		0	0	0	0	0	0	0	0	0	0	0	0.204253	0	0	0	0.189662	0.159021	0.103135
HmN_000137900	210		0	0	0.950832	0	0	0	2.10134	4.38165	0	1.75946	1.27215	0.440603	1.50139	3.01632	0.346389	0.409128	1.37213	2.22478
HmN_000138000	981		0	0	0	0.0653852	0	0	0.449828	0.0937968	0.144027	0	0	0	0.0803497	0.107616	0	0.0875809	0.440591	0.381002
HmN_000138100	357		0	0	0	0	0	0	0	0.773233	0	0	0.374163	0.259178	0	0.295717	0	0	0.807133	0
HmN_000138200	501		0	0	0	0	0.437833	0.484719	0.2936	0	0.282017	0	0	0	1.73065	0.842883	0.580772	0.342981	0	0
HmN_000138300	9336		40.5786	39.9028	40.7862	41.2367	41.8377	40.3613	31.0542	32.1795	34.8081	41.1595	42.3649	43.9938	38.9472	41.3984	40.9601	23.8903	21.7283	20.5678
HmN_000138400	1884		15.9491	18.676	24.2351	23.3556	20.4529	23.0298	20.6899	20.8059	22.8735	6.668	5.88472	7.71056	30.249	40.0655	41.1971	7.29655	4.58832	3.2734
HmN_000138500	1341		3801.25	3826.28	3732.87	3765.1	3860.75	3862.93	1696.57	1599.04	1506.99	1431.93	1490.26	1432.27	1445.27	1621.91	1894.76	1349.11	1129.92	1467.67
HmN_000138600	1380		0.996195	0.827818	1.54338	1.11553	1.64251	1.29048	10.4458	10.8684	11.979	0.133872	0.290383	0.469338	19.0203	16.4477	23.1403	5.04294	4.90684	0.406264
HmN_000138700	351		139.601	143.205	134.254	133.951	170.192	169.276	8.80049	11.0103	13.2837	22.6323	12.939	12.9168	31.8885	8.12085	11.6055	9.05676	4.92558	7.18775
HmN_000138800	1530		0	0.149332	0	0.0838469	0	0.105814	268.23	234.186	322.937	0.482988	2.09531	2.60042	434.351	430.564	521.696	125.057	85.7847	11.1762
HmN_000138900	1101		18.9971	19.818	15.1736	18.8176	15.6729	16.1749	15.364	16.2969	14.7579	21.31	24.2645	24.1191	16.8958	7.67092	8.52287	11.081	6.54283	16.6343
HmN_000139000	1224		10.9909	13.6265	11.5281	9.85201	12.4253	10.846	20.5499	17.6662	20.0854	39.9974	39.8328	43.542	8.24293	12.2476	13.0151	24.8485	28.0142	41.9872
HmN_000139100	1851		0.318303	0.185152	0.071916	0.103959	0.158008	0.21866	7.94672	6.51211	7.93853	0	0.144329	0.149962	11.5403	12.4335	14.0296	3.80615	2.02372	0.504812
HmN_000139200	936		18.2545	19.1619	19.6261	16.5839	18.2795	20.3235	8.95764	8.06111	8.60424	5.62518	3.42503	4.15184	12.4635	11.6173	15.1545	3.12091	3.23241	1.69711
HmN_000139300	585		216.536	207.583	224.819	231.024	241.727	237.171	109.126	95.9469	100.715	133.267	143.166	156.267	134.336	116.038	92.0151	77.1048	91.862	113.247
HmN_000139400	2220		22.2048	24.3401	26.5034	24.5881	23.7469	24.9772	24.6482	21.553	23.2302	18.1414	21.7813	18.6304	20.1318	16.5014	18.0544	26.2008	23.7526	21.2977
HmN_000139500	1893		3.89051	2.95705	3.55118	3.99834	2.74241	4.14789	3.96291	3.20812	4.8515	5.02602	6.77407	5.96316	3.2895	1.61731	2.22875	3.7217	2.58768	2.76423
HmN_000139600	480		0	0	0	0	0.152329	0	75.3856	91.2479	150.416	0	1.11313	2.31317	168.977	165.175	113.053	36.3357	44.7227	4.8667
HmN_000139700	1080		18.4573	21.0496	18.6116	20.0743	19.0242	17.4638	15.3904	17.8917	16.7456	17.2769	13.2339	13.5363	14.8888	11.4369	16.1648	18.3767	17.7423	20.9376
HmN_000139800	2121		87.7332	90.7017	87.5204	91.2395	92.6989	89.8787	73.0268	70.7572	74.1426	102.388	97.1119	101.426	72.7283	72.7201	64.2363	54.8069	57.4662	57.2715
HmN_000139900	891		0	0	0	0	0	0	149.24	129.502	186.643	0.207343	2.99834	1.24615	275.129	283.063	301.907	75.6955	52.8753	8.18
HmN_000140000	1788		92.1552	97.0519	100.582	103.066	93.7694	96.7936	98.3916	78.9432	88.7413	90.3049	85.4648	80.9867	65.5977	73.451	75.3861	106.435	103.865	138.489
HmN_000140100	699		157.62	158.529	156.445	156.457	163.705	163.17	120.789	119.132	141.897	108.626	125.359	152.49	197.903	242.859	171.188	99.8061	82.2392	89.4304
HmN_000140200	375		0	0.609274	0	0.342095	0.389963	0.215862	0	0	0	0	0	0	0	0	0	0	0	0
HmN_000140300	363		0	0	0	0	0.604281	0.222997	0	0	0	0	0	0	0	0	0.400781	0	0	0
HmN_000140700	297		1.98377	0.769285	1.12051	0.863877	0.738566	2.18042	0	0	0.951452	1.55507	0.449751	0.934613	0	0.355458	0	0.289282	0.485095	0.943846
HmN_000140800	1764		0.111334	0	0.0377314	0.109087	0.165801	0.137667	0	0.0521625	0.0800967	0.0523647	0	0	0.0893685	0.119695	0.12371	0.146117	0	0
HmN_000140900	324		0	0	0	0	0	0	0	0	0	0	0	0	0	0	0	0	0	0
HmN_000141000	390		0.503571	0.29292	0.511986	0.328938	0.187482	0.207559	0.377164	0.235935	0	0	0	0	0	0	0	0.2203	0	0
HmN_000141300	423		0	0	0	0	0	0.382733	2.08644	3.0454	3.00618	0.218372	0	0	2.79514	3.2445	6.70668	2.03113	0.681197	0.2209
HmN_000141500	864		0	0	0	0	0.0846274	0.0936899	0	0	0	0	0	0	0	0	0.0841918	0.0994408	0	0
HmN_000141700	213		1.38305	1.07267	1.5624	0.903421	0	0.380038	0	0	0	0.867337	0	0	0	0	0	0	0	0
HmN_000141900	1539		0	0.148459	0	0.0833566	0.0950202	0	0	0	0	0	0	0	0	0	0	0	0	0
HmN_000142000	3261		0	0	0	0.0393394	0	0	0	0	0	0	0	0	0	0	0.0446131	0	0	0
HmN_000142200	1263		0	0	0	0	0	0	0.698783	0.0728541	0.223738	0.219409	0.423044	0	0	0.167175	0.230378	0.272104	0.342217	0.813815
HmN_000142300	1146		0.171372	0	0	0	0	0	2.31037	5.45986	7.02755	0.403017	0.349676	1.4533	12.6557	12.6206	9.07684	4.94809	4.52586	1.38612
HmN_000142400	13092		3.72024	3.23729	3.44687	4.0518	3.44032	3.25227	2.3482	2.64265	3.0218	6.20184	5.56057	4.69277	2.47451	2.38688	2.71698	2.47408	2.44304	2.6836
HmN_000142500	564		143.812	136.114	138.545	134.2	149.477	149.122	170.045	155.642	132.022	158.538	218.838	207.857	137.521	174.829	145.483	150.507	174.472	234.762
HmN_000142600	7368		20.7641	22.5129	23.0984	23.1308	21.7627	22.8298	22.7987	27.0499	22.628	18.7551	20.0509	19.2764	24.0171	29.2871	26.6265	20.3948	16.0146	16.0427
HmN_000142700	885		0.998607	3.48525	3.30911	2.31929	1.81762	2.83547	8.31039	7.90182	8.14217	2.50499	1.8112	1.56825	11.4895	10.8553	16.6854	7.86357	7.00016	1.05583
HmN_000142800	1074		61.2584	61.7996	65.1948	64.3818	63.6549	62.4823	41.3616	44.4652	45.6498	51.1741	51.4903	51.5186	54.8972	61.0425	55.8093	31.9988	25.0854	26.2748
HmN_000142900	4236		9.50437	10.1402	9.97745	9.35795	9.76979	9.89875	10.9383	10.079	9.47274	14.8065	11.5413	12.3849	8.20608	8.07484	9.82253	8.9446	9.6593	12.5293
HmN_000143000	1164		5.6522	4.22016	3.48802	3.41654	4.71122	2.99035	10.3623	12.3319	10.439	38.7261	44.1811	39.0297	6.97489	9.79526	11.9986	8.78359	8.91174	7.38535
HmN_000143100	717		24.5149	25.3333	26.8275	27.5537	23.7608	29.918	13.9503	11.4216	6.30586	13.2695	10.8053	10.8399	8.79476	9.12888	10.0438	8.38797	3.41596	4.56126
HmN_000143200	2172		29.5674	27.8234	29.0196	28.5276	31.1055	28.3244	22.0099	26.0539	25.5	53.373	58.6087	64.4534	27.5808	31.2533	31.1798	17.6027	16.5167	17.9396
HmN_000143300	2577		11.6982	12.7671	9.84039	10.1802	10.64	8.57541	21.2906	22.3163	24.6176	54.0536	53.4927	50.4462	24.5003	24.539	23.0617	26.4052	23.3134	24.8378
HmN_000143400	5916		9.99226	10.8523	9.76547	9.81225	9.46728	10.5085	10.6665	10.9652	10.6278	11.2263	9.91209	9.24328	9.87286	10.8319	10.6235	11.6618	10.1066	10.0454
HmN_000143500	255		0	0	0	0	0.286737	0	0	0	0	0	0	0	0	0	0	0	0	0
HmN_000143600	1431		42.2704	45.1048	50.5582	49.3062	50.8403	48.9874	49.0313	49.5117	35.2486	33.3079	35.0976	32.782	35.6384	30.9852	41.0729	31.821	26.5795	33.9547
HmN_000143700	1017		95.879	91.9977	95.4197	92.5247	94.4711	98.6181	83.0205	78.5337	71.6873	79.2014	64.7523	67.4162	67.5072	63.2181	67.0912	84.5651	96.3321	106.212
HmN_000143800	4275		16.056	15.9266	17.8423	16.7597	16.4537	15.6216	9.32454	8.00689	6.80839	8.47008	8.59262	9.00377	10.9707	11.9277	12.2172	5.46652	4.14526	4.87422
HmN_000143900	948		0	0	0	0.202984	0.0771288	0.170777	24.3605	23.9743	27.5725	0	0.845419	0	78.7399	86.3055	49.4153	18.6697	12.0061	0.492831
HmN_000144100	300		0	0	0	0	0.243727	0	0	0.306716	0	0	0	0	0	0	0.242472	0	0	0
HmN_000144200	777		0.252758	0	0.0856605	0	0.094103	0.10418	39.5658	33.7506	48.5516	0	1.3753	0.714492	130.662	142.528	92.4016	28.3072	23.3632	1.20258
HmN_000144300	759		6.72755	7.3751	7.10305	6.42274	6.06909	7.78552	0.775198	3.15202	0.186154	2.43403	1.58391	4.0229	1.24621	1.8082	1.53342	0.226395	0	0.369331
HmN_000144400	396		0	0	0	0	0	0	0	0	0	0	0	0	0	0.266594	0	0	0	0
HmN_000144500	2157		0.0455245	0.105924	0.215998	0.0892112	0.0677961	0.0750562	1.02291	1.57837	0	0	0	0.042896	0.0730858	0.0489435	0.168618	1.75259	0.734726	1.03967
HmN_000144600	1680		33.5504	33.7957	38.7068	36.0422	36.6461	37.9203	27.405	32.0956	32.1268	35.1891	39.3573	37.947	30.4501	32.1741	37.7997	25.8773	23.6692	25.3625
HmN_000144700	1911		80.4172	81.8383	87.0377	90.2901	88.4227	83.5743	47.7227	49.2575	47.6144	65.5929	74.8614	80.7611	43.7218	53.2551	55.0035	34.8883	32.5691	32.1248
HmN_000144800	2625		43.356	41.3001	50.8885	51.7053	44.5951	44.1899	19.1642	20.4711	19.6461	31.2127	32.2109	28.4806	19.5481	24.2914	26.3256	17.5107	15.3678	12.8503
HmN_000144900	339		5.50363	4.71783	3.53406	6.05478	3.66669	5.96962	19.5257	19.5429	27.9247	0.817446	2.75821	0.54588	75.5678	26.4706	22.1015	11.1514	7.6499	2.20509
HmN_000145000	1053		0	0	0.126416	0.0609144	0	0	37.1576	30.4094	36.2284	0.438611	1.64909	2.54822	55.5429	57.9488	79.7188	14.6866	12.8612	1.33106
HmN_000145100	1044		1.41087	1.20367	0.701284	1.65887	1.40073	0.852901	78.4782	75.1806	104.615	1.32718	4.22223	3.54508	169.273	143.896	161.3	41.6417	24.4262	3.4906
HmN_000145200	1056		1.6738	0.865446	0.945429	1.51853	1.31557	1.91638	61.5677	54.2852	86.8349	5.42332	4.93321	4.20576	108.158	99.4728	107.597	26.6863	21.8293	5.84004
HmN_000145300	1368		29.1431	29.8958	33.1818	33.525	34.4211	35.326	22.9028	21.3894	23.1353	31.6007	33.0035	26.784	20.2243	28.8623	28.1289	18.2762	16.2188	16.1199
HmN_000145400	2118		0.185451	0	0.1257	0	0.241656	0.152876	26.3908	23.6771	32.0873	0	0.819873	0.436859	56.6796	76.063	49.9713	16.1043	6.46221	0.749996
HmN_000145500	1689		131.626	133.921	147.973	145.603	140.046	147.902	37.013	40.6957	38.9825	78.2614	78.4533	66.834	50.8686	57.9422	55.6437	30.6737	23.2871	30.815
HmN_000145600	2205		3.47361	3.31578	4.16555	4.2471	3.94605	3.52427	4.20268	3.83916	4.29319	3.51891	4.54341	4.40603	2.07335	2.77693	4.02471	3.54577	3.46298	4.95808
HmN_000145700	2397		37.1155	39.4141	47.2044	45.197	41.5464	44.0031	62.5318	54.9324	64.6035	59.5385	58.6242	50.6832	72.312	85.5315	70.0105	54.4104	46.4015	57.46
HmN_000145800	354		0	0	0	0	0	0	0	0	0	0	0	0	0	0	0	0	0	0
HmN_000145900	4335		17.6912	15.4163	17.7949	15.9062	15.4164	14.5837	15.9479	15.8558	14.8298	8.65116	10.1068	8.06807	18.4193	26.4963	23.2908	11.5547	9.77105	9.3764
HmN_000146000	1320		49.1726	52.9653	55.6164	55.8335	55.1709	53.2295	74.7727	67.7563	74.4987	34.4293	41.0848	45.0717	123.907	151.798	108.341	44.7809	33.9445	33.129
HmN_000146100	1113		102.784	98.5349	115.834	110.305	113.52	104.367	42.8198	37.8641	42.146	60.253	54.0065	58.7748	46.3165	40.5021	44.1156	29.0249	24.2064	28.5443
HmN_000146200	2409		54.9476	55.2937	57.4959	52.1078	48.4722	51.2436	27.7824	30.9771	28.5045	30.7521	36.5408	31.0727	27.4195	30.2383	32.9134	23.0752	23.7431	17.2219
HmN_000146300	2832		24.5144	25.3326	28.5317	28.8552	26.7996	26.0966	8.82978	9.29244	10.3773	20.4509	22.5929	16.9567	8.37773	11.1088	10.377	8.19122	7.52925	7.3578
HmN_000146400	1515		19.3152	17.1924	15.4644	21.1269	19.6912	18.8612	14.3696	15.6698	15.1083	14.6331	13.4899	15.4516	23.777	24.8075	25.3036	10.8885	9.03429	3.45391
HmN_000146500	327		0.300295	0	0	0	0.670808	0.247548	0	0	0	0	0	0	0	0	0	0	0	0
HmN_000146600	1548		17.6347	18.1542	15.9946	19.2677	18.4685	16.6812	1.14026	1.0105	0.730184	2.74489	2.58869	3.70585	0.509193	0.545587	0.798843	0.444015	0	0.724347
HmN_000146700	1515		1.29632	0.603242	1.66945	1.01612	0.820467	1.12205	6.50514	6.43799	8.76655	0.792626	0.352676	0.122147	11.5503	11.7069	14.6924	1.98488	0.760782	0.185031
HmN_000146800	228		0	0	0	0	0	0	0	0	0	0	0	0	0	0	0	0	0	0
HmN_000146900	249		0	0	0	0	0	0	0	0	0	0	0	0	0	0	0	0	0	0
HmN_000147000	684		16.0789	19.2068	19.3642	14.254	18.9209	20.5921	4.08594	4.17026	4.95757	5.26679	8.98319	9.33383	3.22667	6.48244	4.99833	4.27072	9.05723	3.41523
HmN_000147100	918		30.9137	26.5064	35.1642	30.0451	31.2225	28.129	19.0677	18.1423	20.3163	27.8724	32.7393	36.7889	14.4251	27.8303	28.13	16.6593	13.654	15.9806
HmN_000147200	1656		26.328	25.9383	29.9432	29.7474	28.3023	32.0175	17.3208	10.0572	9.47057	18.8536	23.9566	18.6059	13.7084	15.2364	17.9658	6.22586	4.95904	3.10341
HmN_000147300	2439		25.7267	30.6792	30.482	32.1635	29.6489	27.4141	22.6159	18.3728	22.303	33.9718	36.2556	32.6252	21.7822	23.8931	24.3665	22.7562	23.6873	20.9178
HmN_000147400	240		0	0	0	0	0	0	0	0	0	0	0	0	0	0	0	0	0	0
HmN_000147500	213		0	0	0	0	0	0.380038	0	0	0	0	0	0	0	0	0	0	0	0
HmN_000147600	315		0	0	0	0	0	0	0	0	0	0	0	0	0	0	0	0	0	0
HmN_000147700	2658		0.738874	1.0315	0.951547	1.11007	0.907786	1.27909	0.66408	0.623124	0.637881	1.66811	1.55789	1.21837	0.978615	0.834083	1.01258	0.743449	0.433629	1.08979
HmN_000147800	4893		6.422	7.07426	6.39329	7.27556	6.2314	6.5182	10.8825	9.68477	12.8499	15.4802	15.1512	15.8088	10.1489	10.8527	13.7218	11.9578	11.6012	11.5536
HmN_000147900	582		66.9827	72.0372	82.7975	78.5805	76.3845	78.8618	57.6244	53.7543	64.8189	103.323	100.985	110.65	44.1517	39.9066	46.4947	62.8876	59.1641	77.7067
HmN_000148000	423		0	0	0	0	0	0	0	0	0	0	0	0	0	0	0	0	0	0
HmN_000148200	960		0	0	0	0	0	0	0	0	0	0	0	0	0	0	0	0	0	0
HmN_000148300	2697		19.1514	21.1789	20.9028	21.595	21.7158	22.3305	31.7967	31.0127	25.9321	34.6949	35.5609	35.3365	18.3248	18.4368	21.9816	44.3442	39.2101	43.6195
HmN_000148600	276		0	0	0.241153	0	0	0	0	0	0	0.669358	0	0	0	0	0	0	0	0
HmN_000148700	1722		6.10163	8.82333	8.38742	8.79078	8.61961	8.32045	26.3949	23.0304	28.2253	19.9548	23.3487	19.6122	32.4081	33.1672	36.2864	24.6973	25.0999	25.178
HmN_000148800	912		102.396	96.0759	97.6479	97.7616	105.668	97.4572	63.0633	66.8922	91.4051	72.4184	93.5912	102.774	139.669	193.779	121.396	46.8209	46.7606	36.0648
HmN_000148900	720		3.27321	3.96663	3.51279	4.98889	3.35124	4.38469	60.2676	54.442	44.9383	22.1948	22.6337	17.7343	52.8771	39.7358	23.2369	59.5451	50.4256	99.151
HmN_000149000	723		5.02526	4.10818	5.24733	3.90358	3.94413	4.70238	23.8036	40.4712	29.8997	138.876	132.283	136.55	27.3646	25.2611	22.3356	44.325	40.2528	58.8043
HmN_000149100	747		34.441	35.021	32.3436	30.6546	31.3223	30.9922	67.3442	65.1617	41.8008	0.247313	0.894084	0.495457	10.8685	8.76226	3.50562	235.322	255.359	309.968
HmN_000149200	906		0	0	0.146928	0	0.484226	0	48.0571	51.7963	75.7917	0.20391	0.737175	1.12339	102.052	103.474	107.266	26.363	22.422	3.71288
HmN_000149400	720		4.2279	3.49063	3.32791	4.00893	3.85901	2.47341	12.8707	8.56248	13.7366	0	0	0.385528	9.85288	16.1289	22.6308	3.93785	1.40071	1.03823
HmN_000149500	591		82.2457	82.7314	80.5231	78.7948	90.9336	89.714	101.796	89.835	132.684	67.0513	68.0312	78.906	180.186	193.458	254.658	52.3351	33.8852	21.5024
HmN_000149600	1725		26.0149	25.563	31.6393	32.1272	29.5863	31.5346	16.4575	17.2294	15.1529	32.6111	28.8834	24.5129	15.4904	17.5034	20.9159	14.3444	12.3611	15.2214
HmN_000149700	1191		102.401	102.729	82.5411	83.585	95.0351	93.8617	182.54	195.232	194.082	155.659	169.129	173.633	158.573	162.124	186.466	172.411	182.299	179.507
HmN_000149900	1323		9.50048	7.59865	10.8163	10.1329	9.78223	11.5028	7.00447	11.1976	10.2524	7.74998	8.78392	8.53232	11.4392	15.321	12.8659	7.59809	7.18732	5.72086
HmN_000150000	321		2754.39	2672.34	3014.2	3045.09	3676.86	3678.72	39.4083	73.0958	87.5914	145.032	73.6541	98.8681	167.468	34.8615	40.7897	26.2301	32.3155	20.0854
HmN_000150100	282		2104.95	1943.68	2109.33	2088.28	2185.24	2160.05	32.3398	38.5026	37.5773	78.9415	55.4199	59.0596	80.7796	23.2107	25.7949	26.8109	26.0558	30.1529
HmN_000150200	783		251.072	264.807	248.892	257.473	238.124	239.329	169.449	159.586	176.658	262.25	307.242	271.672	197.813	258.737	231.696	102.595	84.4567	66.7093
HmN_000150300	1446		38.8439	38.7907	40.8279	43.9596	44.1439	40.474	41.7071	45.371	48.2694	13.8621	16.1659	14.6533	76.2065	139.082	108.459	16.2802	8.56867	8.72372
HmN_000150400	783		31.478	31.3683	30.5165	35.7988	37.6329	29.2571	31.1846	29.3789	30.3152	27.4873	34.1191	35.9235	37.2471	36.5387	31.4935	29.9557	27.0482	13.7237
HmN_000150500	456		0	0	0	0	0	0	0.322574	0	0.929544	0	0	0	0.69143	1.62061	0.957128	0.376828	0	0
HmN_000150600	267		0	0	0	0	0	0	0	0	0	0	0	0	0	0	0	0	0	0
HmN_000150700	702		43.0833	46.7045	43.424	40.2035	38.2255	42.0884	8.38141	10.6171	8.85582	26.1851	23.7849	30.974	7.41071	4.66197	4.97379	7.46571	5.74651	9.84988
HmN_000150800	363		324.075	298.028	314.822	317.534	368.41	318.886	4.05217	8.87194	8.9523	35.8798	19.5029	18.0975	20.6286	6.10742	1.40273	4.49702	2.77827	4.1186
HmN_000150900	4818		17.0998	17.1667	17.9312	18.3322	17.6042	17.3556	23.7219	21.9819	19.9707	18.5586	18.5476	19.1276	17.7344	20.4218	19.6424	20.6322	20.1846	24.4947
HmN_000151000	648		240.642	230.241	235.008	247.861	266.52	250.464	117.13	157.192	144.561	156.946	175.216	162.636	162.39	116.975	135.38	130.201	126.731	161.791
HmN_000151100	603		291.658	288.344	277.712	290.398	304.234	308.623	428.841	403.918	427.387	320.313	316.773	360.9	432.416	390.771	370.223	528.039	588.956	769.995
HmN_000151200	714		138.493	126.239	141.04	130.891	132.616	134.46	128.965	132.996	142.676	140.11	134.699	125.831	131.703	114.59	131.933	160.402	143.67	165.157
HmN_000151300	3972		39.0363	40.8694	41.0878	39.2899	38.0501	39.0475	31.0704	27.66	24.1532	25.6277	24.5831	23.5743	22.8611	25.2765	27.6353	31.386	30.6863	31.5704
HmN_000151400	3723		56.391	53.4526	54.5087	56.4071	49.4917	51.2693	28.0517	26.9396	25.3132	25.4313	26.1914	22.4917	31.4191	38.2812	31.9259	23.3542	19.1169	18.3217
HmN_000151500	1185		48.2281	49.1661	43.7543	51.6391	44.4879	42.8307	37.9837	47.6768	40.8968	51.3694	45.9908	51.2996	36.7841	32.5177	38.857	38.3544	44.377	49.1254
HmN_000151600	1620		70.3134	73.7616	85.0466	85.9198	83.6796	78.3997	20.5205	18.8005	14.5651	49.0937	63.8197	46.1491	16.2512	18.5075	19.8019	9.33417	5.69178	4.90275
HmN_000151700	2541		15.2647	12.5883	14.9304	16.0546	13.6395	12.3286	27.8442	24.2258	25.9116	20.939	24.234	22.8677	17.9919	16.6604	17.0904	21.4369	16.7263	34.2359
HmN_000151800	546		414.907	437.916	422.267	434.903	439.78	433.057	470.646	422.829	394.372	373.377	369.414	362.142	398.446	421.898	380.229	514.557	525.102	623.109
HmN_000151900	2517		43.6558	40.0313	47.1752	47.7058	43.0226	41.7122	27.2331	31.3661	22.51	67.0491	68.1414	56.1703	16.0966	17.1548	20.1145	33.9639	32.5696	36.6412
HmN_000152000	972		0	0.470119	0.273902	0.263962	0.225673	0.16656	5.44792	6.34258	3.05258	0.190065	0	0.285576	4.62234	2.60669	2.24511	4.24281	2.96447	6.63314
HmN_000152100	783		170.809	167.638	163.378	177.192	176.398	168.823	148.597	132.793	149.952	112.662	119.587	135.186	209.389	292.714	215.159	107.972	93.8408	104.062
HmN_000152200	1410		188.941	199.553	203.073	189.426	184.247	192.094	141.46	144.548	178.467	158.08	154.892	168.648	135.005	143.232	179.533	206.932	197.207	204.841
HmN_000152300	1830		6.33179	5.43103	6.91042	5.95863	4.51494	5.79464	14.5486	11.5144	16.6769	3.98762	4.45254	3.94376	20.9333	19.7874	25.4795	7.5588	4.64498	1.63394
HmN_000152400	921		3.41182	5.5817	4.98645	4.45727	4.92217	5.00982	8.62439	7.59296	9.35801	1.50442	1.74041	1.70788	13.3511	11.5773	18.0867	3.54489	2.65933	2.7393
HmN_000152500	2526		12.6341	10.4922	12.9375	12.9759	12.36	12.1775	7.10429	5.09978	4.64257	7.56963	6.66294	7.54572	7.86358	6.39445	9.30149	3.6734	3.82142	2.33047
HmN_000152600	1023		99.8282	106.757	108.523	112.422	120.22	112.441	33.0709	31.9308	33.4236	48.127	47.1368	55.4436	38.0631	38.9055	40.7439	29.0589	24.3643	24.2051
HmN_000152700	936		394.674	386.899	392.949	404.251	417.304	421.345	208.54	181.08	209.672	175.466	188.519	203.242	168.594	188.133	183.175	212.13	232.887	269.94
HmN_000152800	2385		20.9156	20.6444	21.9907	22.9408	22.5639	22.8419	20.7227	20.9107	21.8601	21.3403	18.7063	21.8805	20.3915	22.3979	23.3322	18.8405	21.5053	20.2553
HmN_000152900	201		109.433	101.735	114.904	104.671	82.5761	92.2244	51.2267	37.0805	52.7204	57.4449	23.9241	29.9216	92.9406	23.6353	15.9236	28.2115	35.1223	46.023
HmN_000153000	885		41.1648	38.3378	46.1771	47.8354	40.5661	43.4467	42.5492	46.3712	46.6179	44.2548	36.9787	36.0697	48.8079	60.3604	54.0837	48.2493	42.9778	39.1712
HmN_000153100	711		3363.54	3431.83	3113.45	3148.59	3108.29	3160.39	1198.27	1222.46	1340.77	1836.25	1737.62	1767.25	1247.2	1096.1	1114.25	969.253	1042.35	1083.44
HmN_000153200	2913		16.8211	18.5104	20.4953	20.5442	17.6708	17.9792	38.1747	33.3249	41.0339	17.1551	19.2133	15.9452	66.2406	82.739	68.122	24.3623	15.53	12.1893
HmN_000153300	2229		43.9659	44.0248	46.5519	46.4453	44.6122	46.7748	26.7263	26.7499	24.6577	36.6336	33.4989	32.2951	22.6674	25.1495	29.6319	30.2964	30.2495	26.2422
HmN_000153400	1470		5.81162	7.53821	6.06721	5.89067	5.91908	4.6256	4.20268	5.0702	5.19027	0.377026	2.36257	3.27305	7.77506	6.67899	11.3814	2.33787	2.05819	3.11469
HmN_000153500	1437		7.72177	6.51885	7.31816	5.04394	6.00413	5.46414	244.747	236.216	276.977	186.093	170.014	194.197	185.95	168.826	151.254	219.605	257.266	267.252
HmN_000153600	1461		477.069	474.627	443.22	431.087	476.443	475.826	364.462	422.852	195.157	24.2783	24.5941	25.9024	272.401	195.968	159.872	304.208	227.302	387.961
HmN_000153700	1677		37.8264	41.4176	45.7613	42.9914	38.8481	40.0637	23.5069	23.5935	24.3488	27.5957	25.8072	27.587	26.1803	21.4038	27.5872	18.29	20.1891	19.3902
HmN_000153800	348		0	0	0	0	0	0	0	0	0	0	0	0	0	0	0	0	0	0
HmN_000153900	618		0	0	0	0	0	0	0	0	0	0	0	0	0	0	0	0	0	0
HmN_000154000	1326		41.8408	49.538	45.2255	49.2439	47.422	49.2037	88.3007	86.1163	94.9396	107.976	97.9156	117.438	79.1202	73.4062	70.6571	84.2322	100.178	93.0179
HmN_000154100	594		82.9875	75.0053	74.6259	79.6927	78.5342	78.9039	84.1951	74.82	104.66	171.991	143.021	162.311	129.116	74.4685	51.1886	52.5047	81.981	69.2153
HmN_000154200	3954		19.1475	20.2244	20.8058	21.5756	20.6743	20.8614	10.6024	12.1011	9.54087	15.9092	18.2764	18.7206	11.1038	12.0416	13.4114	10.2561	8.41702	8.27118
HmN_000154300	2400		21.235	19.0874	19.8011	19.3765	17.396	17.9435	10.8482	11.6169	12.6573	37.7953	34.1732	30.8037	12.1519	12.0527	11.0931	8.91387	9.18466	11.3297
[truncated: 10,922 more rows]
