# Supplementary material for: Genome-wide transcriptome profiling and spatial expression analyses identify signals and switches of development in tapeworms
Source: EvoDevo. 2018 Nov 9;9:21. doi: 10.1186/s13227-018-0110-5 (PMC6225667; doi:10.1186/s13227-018-0110-5)
Supplement: Supplementary file 2 — Additional file 2. Ranked lists of differentially expressed genes for each comparison, showing log2fold changes, mean normalised counts, adjusted p values and Gene Ontology terms. Table S2.1. Summary of differential expression. Table S2.2. Larval cf. Whole Adult. Table S2.3. Scolex-Neck cf. Mid. Table S2.4. Scolex-Neck cf. End. Table S2.5. Mid cf. End. Table S2.6. Intersection of up-regulated genes between the Scolex-Neck cf. Mid and Scolex-Neck cf. End contrasts. Table S2.7. Intersection of up-regulated genes between the Mid cf. Scolex-Neck and Mid cf. End contrasts. Table S2.8. Intersection of up-regulated genes between the End cf. Scolex-Neck and End cf. Mid contrasts. [file 13227_2018_110_MOESM2_ESM.xlsx]

## Sheet: S2.1 DE Summary
Additional file 2. Table S2.1. Summary of differential expression
	No. gene modelsa (No. / % novelb)			No. GOIc (No. / % zinc fingers)
Table: Comparison UP cf. DOWN	UP	DOWN		UP	DOWN
S2.2: Larvae cf. Whole Adults	2266 (768 / 34%)	3087 (1464 / 47%)		72 (33 / 46%)	n/a
S2.3: Scolex-Neck cf. Mid	1052 (387 / 37%)	2066 (981 / 47%)		61 (19 / 31%)	62 (27 / 44%)
S2.4: Scolex-Neck cf. End	812 (253 / 31%)	1440 (618 / 43%)		49 (18 / 37%)	22 (8 / 36%)
S2.5: Mid cf. End	457 (184 / 40%)	924 (381 / 41%)		16 (8 / 50%)	18 (8 / 44%)
Intersect of adult comparisons				Total no. unique GOIs:	191 (76 / 40%)
S2.6: (UP in Scolex-Neck cf. Mid) & (UP in Scolex-Neck cf. End)	481 (163 / 34%)	n/a
S2.7: (UP in Mid cf. Scolex-Neck) & (UP in Mid cf. End)	358 (151 / 42%)	n/a
S2.8: (UP in End cf. Scolex-Neck) & (UP in End cf. Mid)	667 (281 / 42%)	n/a
aOf 12,371 gene models in the PRJEB124 release of the Hymenolepis microstoma genome (www: parasite.wormbase.org)
bPutatively novel protein models are annotated as "n/a" (not annotated), "expressed protein", "hypothetical protein", "expressed conserved protein" or "hypothetical transcript"
cGenes of interest: transcription factors, signaling components and post-transcriptional/translational regulators

## Sheet: S2.2 DE Larvae cf. Whole Adult
Additional file 2. Table S2.2. Differentially expressed gene models in Larvae cf. Whole Adult samples, showing log2fold changes, transformed means, adjusted p-values and Gene Ontology hits (n/a = no annotation). Gene of interest highlighted in grey.
Gene Model No.	Description	log2fold change	mean Larvae	mean Whole Adults	padj	Gene Ontology
HmN_000893200	AntigenB like protein	13.3662	24000.8	0.463333	8.34163e-37	n/a
HmN_000893100	AntigenB like protein	12.4562	12458.7	0.463333	5.22227e-32	n/a
HmN_002092200	n/a	11.9173	5752.08	0	1.01863e-31	n/a
HmN_000716100	Expressed protein	11.4865	7747.8	1.41667	7.22796e-34	GO:0016020; GO:0016021
HmN_002201300	40S ribosomal protein S24	11.1587	5607.52	0.463333	2.10288e-24	GO:0000166; GO:0003735; GO:0005622; GO:0005840; GO:0006412; GO:0030529
HmN_002167700	Ribosomal protein L3	10.0791	6197.03	4.08	3.9025e-71	GO:0003735; GO:0005622; GO:0005840; GO:0006412; GO:0030529
HmN_000613600	60S ribosomal protein L32	9.54826	6332.38	0	9.46209e-16	GO:0003735; GO:0005622; GO:0005840; GO:0006412
HmN_000429400	Protein DJ 1	9.12072	1308.04	0.74	1.84686e-16	n/a
HmN_000125600	Forkhead box Q:D protein transcription	8.96389	865.53	0.463333	8.67753e-18	GO:0003677; GO:0003700; GO:0005634; GO:0006351; GO:0006355; GO:0043565
HmN_000602200	Procollagen lysine 2 oxoglutarate 5 dioxygenase	8.96033	8547.62	16.16	1.23856e-195	GO:0051213; GO:0055114
HmN_000760600	n/a	8.88226	816.377	0.463333	1.82638e-17	GO:0007017; GO:0030286; GO:0005875
HmN_000019900	Expressed protein	8.6786	6790.68	14.9333	9.30525e-162	n/a
HmN_002217200	n/a	8.60962	663.423	0.463333	1.64021e-16	n/a
HmN_000330800	40S ribosomal protein S24	8.45284	5576.83	7.31	3.41729e-22	GO:0000166; GO:0003735; GO:0005622; GO:0005840; GO:0006412; GO:0030529
HmN_002182000	n/a	8.40254	776.84	1.20333	5.76634e-19	n/a
HmN_002190800	n/a	8.37114	367.887	0	4.04053e-16	GO:0045454; GO:0015035; GO:0006662
HmN_002208800	n/a	8.36818	1160.87	2.62	2.52432e-33	GO:0008270; GO:0006355; GO:0003700; GO:0043565; GO:0005634
HmN_000263700	Expressed protein	7.99283	268.11	0	6.9908e-15	n/a
HmN_002213200	n/a	7.88143	524.483	1.17	6.62375e-17	n/a
HmN_002031400	n/a	7.87826	237.523	0	1.01422e-14	n/a
HmN_002208900	n/a	7.79817	491.417	0.93	1.48486e-16	n/a
HmN_000257200	60S ribosomal protein L23a	7.67551	4183.35	4.34333	1.34803e-12	GO:0000166; GO:0003735; GO:0005622; GO:0005840; GO:0006412
HmN_000507700	Expressed protein	7.53929	522.22	1.88	2.16079e-21	n/a
HmN_000134500	Expressed conserved protein	7.5056	2314.29	12.1433	1.76321e-100	GO:0016020; GO:0016021
HmN_002215800	60S ribosomal protein L23a	7.40456	4123.57	4.34333	2.02466e-11	GO:0000166; GO:0003735; GO:0005622; GO:0005840; GO:0006412
HmN_000064700	Homeobox protein aristaless	7.38929	160.253	0	4.57374e-13	GO:0003677; GO:0005634; GO:0006355; GO:0043565
HmN_002239900	n/a	7.29449	344.153	1.20333	1.88547e-14	n/a
HmN_000357700	Tetraspanin	7.22728	240.173	0.74	7.15778e-12	GO:0016020; GO:0016021
HmN_002077700	n/a	7.20768	8988.28	54.58	3.66273e-67	n/a
HmN_000571000	Expressed protein	7.14583	914.9	5.46333	5.2922e-48	n/a
HmN_000453100	Expressed protein	7.06234	203.657	0.463333	1.45373e-11	n/a
HmN_000110400	Expressed protein	7.05932	141.45	0	3.91651e-11	GO:0006406; GO:0043248; GO:0008541
HmN_000929200	Expressed conserved protein	7.05749	123.543	0	5.79968e-12	n/a
HmN_002016500	n/a	7.01603	762.873	4.20333	5.80959e-37	GO:0004869
HmN_002234100	Expressed protein	7.00219	137.387	0	7.08924e-11	GO:0006406; GO:0043248; GO:0008541
HmN_002029800	n/a	6.92475	260.24	1.44667	2.79701e-13	n/a
HmN_000644000	PBX/knotted	6.85651	669.347	4.26667	1.14578e-39	GO:0003677; GO:0005634; GO:0006355
HmN_000074300	POU domain protein	6.78124	99.5167	0	4.46716e-11	GO:0003677; GO:0003700; GO:0005634; GO:0006351; GO:0006355; GO:0043565
HmN_000176200	Expressed protein	6.76	303.583	2.15667	6.51222e-17	n/a
HmN_000736200	Peptidyl-prolyl cis-trans isomerase	6.5516	430.383	3.82667	7.34387e-28	GO:0000413; GO:0003755; GO:0006457; GO:0008152; GO:0016853
HmN_002232200	n/a	6.5382	601.023	6.01	3.96094e-39	n/a
HmN_002078800	n/a	6.50107	301.33	2.65	4.1696e-20	n/a
HmN_000069100	Neuropeptide	6.48852	356.267	3.11667	1.90584e-23	GO:0005179; GO:0005576; GO:0007218
HmN_000716300	Expressed protein	6.46733	6768.2	67.0167	1.95543e-51	GO:0016020; GO:0016021
HmN_000503600	n/a	6.46369	130.69	0.74	7.52334e-10	GO:0046983
HmN_002006800	n/a	6.453	129	0.74	7.78688e-10	n/a
HmN_000350300	Expressed protein	6.38423	1397.73	12.6333	5.65859e-21	GO:0016020; GO:0016021
HmN_002195400	n/a	6.36371	177.147	0.93	1.16843e-10	GO:0046872; GO:0006801; GO:0004784; GO:0055114
HmN_002135600	n/a	6.3193	69.38	0	1.17192e-09	n/a
HmN_000060300	Expressed protein	6.30943	993.437	11.5167	5.01284e-69	GO:0016020; GO:0016021
HmN_000415200	n/a	6.19405	63.1133	0	2.8463e-09	n/a
HmN_000016000	60S ribosomal protein L35	6.18474	20705	278.933	4.06175e-291	GO:0003735; GO:0005622; GO:0005840; GO:0006412
HmN_000882900	n/a	6.17565	517.327	2.18667	5.62412e-08	GO:0005515; GO:0042802; GO:0006888; GO:0048208
HmN_002078500	n/a	6.05686	719.467	9.44333	3.63076e-45	GO:0016787; GO:0004298; GO:0051603; GO:0005839; GO:0004175
HmN_000575400	Expressed protein	6.02828	2924.92	43.4233	3.72762e-216	GO:0016020; GO:0016021
HmN_000704900	40S ribosomal protein S26	6.01394	15057.1	227.29	2.38214e-295	GO:0003735; GO:0005622; GO:0005840; GO:0006412
HmN_000673700	Expressed conserved protein	6.01222	95.07	0.463333	1.98946e-08	GO:0005739; GO:0033617
HmN_000882100	Protein TFG	5.99265	620.533	9.67667	4.95502e-43	GO:0005515; GO:0042802; GO:0006888; GO:0048208
HmN_002009500	n/a	5.98423	53.8633	0	1.18392e-08	n/a
HmN_000503700	n/a	5.97913	206.43	2.65	5.31951e-17	GO:0046983
HmN_000539300	Expressed protein	5.86706	2030.37	31.1333	3.41403e-34	GO:0016020; GO:0016021
HmN_000107600	Large subunit ribosomal protein 29	5.84915	1407.26	23.6267	6.98847e-92	GO:0003735; GO:0005622; GO:0005840; GO:0006412
HmN_000042400	Homeobox protein prospero	5.84369	1034.89	17.2667	3.60068e-82	GO:0003677
HmN_000338400	n/a	5.84059	466.813	7.37333	4.59551e-41	GO:0016020; GO:0016021
HmN_000868300	60S ribosomal protein L36	5.83675	9933.18	169.313	0	GO:0003735; GO:0005622; GO:0005840; GO:0006412
HmN_000319800	Expressed conserved protein	5.83493	1281.5	22.5067	1.80084e-99	GO:0016020; GO:0016021; GO:0006487; GO:0034998
HmN_000395800	Ribosomal protein L35A	5.75329	19161.3	350.22	0	GO:0003735; GO:0005622; GO:0005840; GO:0006412
HmN_000929800	Mitochondrial import inner membrane translocase	5.71563	755.663	12.6	7.91553e-49	GO:0005739; GO:0006810; GO:0008565; GO:0015031; GO:0042719; GO:0045039; GO:0046872; GO:0042721
HmN_000602600	n/a	5.68764	548.287	10.1733	3.93986e-49	n/a
HmN_000070400	40S ribosomal protein S17	5.66006	18119.9	347.867	2.96901e-162	GO:0003735; GO:0005622; GO:0005840; GO:0006412
HmN_000489800	Fibronectin, type III	5.65889	193.97	3.08667	3.56386e-18	GO:0016020; GO:0016021; GO:0005515
HmN_000150100	Ribosomal protein L37	5.63606	7770.62	153.76	0	GO:0003723; GO:0003735; GO:0005622; GO:0005840; GO:0006412; GO:0019843; GO:0030529; GO:0046872
HmN_000685600	Expressed protein	5.59257	1845.73	37.6033	7.32114e-148	n/a
HmN_000699500	Peptidyl-prolyl cis-trans isomerase	5.58839	9184.66	188.163	0	GO:0000413; GO:0003755; GO:0006457; GO:0008152; GO:0016853
HmN_000430800	n/a	5.57054	94.84	0.93	1.14629e-08	GO:0005515
HmN_000810600	n/a	5.55841	266.943	4.78667	1.34947e-25	GO:0016020; GO:0016021
HmN_000560700	n/a	5.54883	413.813	8.35667	3.42753e-37	GO:0003677; GO:0046983; GO:0006357
HmN_000125000	Expressed conserved protein	5.50985	1188.88	25.02	9.398e-87	n/a
HmN_000095700	n/a	5.50192	229.203	4.01667	5.77566e-22	GO:0005875; GO:0007017; GO:0030286
HmN_000824700	40S ribosomal protein S28	5.44458	1678.5	36.6633	1.61318e-85	GO:0003735; GO:0005622; GO:0005840; GO:0006412
HmN_000022700	Transcription regulator	5.43657	250.9	5.51333	1.32595e-23	n/a
HmN_000583600	Expressed conserved protein	5.43618	460.323	10.0533	1.03494e-42	GO:0016020; GO:0016021
HmN_000617000	Dynein light chain	5.43294	168.11	3.66333	1.33142e-16	GO:0005875; GO:0007017; GO:0030286
HmN_000824200	n/a	5.42292	35.06	0	4.11289e-07	GO:0043461
HmN_000764600	Fatty acid binding protein a	5.35418	1204.49	29.84	1.03564e-95	GO:0005215; GO:0006810; GO:0008289
HmN_000769000	Ribosomal protein L3	5.3413	6159.58	8.13667	8.87581e-07	GO:0003735; GO:0005622; GO:0005840; GO:0006412; GO:0030529
HmN_000111800	Small nuclear ribonucleoprotein F	5.32408	761.093	17.2267	2.82218e-74	GO:0000398; GO:0003723; GO:0005634; GO:0005681; GO:0005732; GO:0006397; GO:0008380; GO:0030529; GO:0000387
HmN_000150000	Zinc finger protein	5.31166	13221.9	322.92	3.57534e-116	GO:0003735; GO:0005622; GO:0005840; GO:0006412; GO:0030529
HmN_002159600	n/a	5.29869	31.7033	0	7.97145e-07	n/a
HmN_002295900	n/a	5.29689	126.713	2.41	5.51901e-13	n/a
HmN_000154900	Small ubiquitin-related modifier	5.27371	1870.46	46.0067	3.01663e-115	GO:0005634; GO:0005515
HmN_000347000	Expressed protein	5.26719	122.413	2.1	7.70196e-13	n/a
HmN_000877500	Calcium binding protein calreticulin	5.26064	75.4967	0.93	8.74168e-08	GO:0005509; GO:0005783; GO:0006457; GO:0016020; GO:0016021; GO:0051082; GO:0005515
HmN_000390000	60S ribosomal protein L22	5.24148	23812	621.04	3.29169e-285	GO:0003735; GO:0005622; GO:0005840; GO:0006412
HmN_002011900	n/a	5.23548	167.23	3.76	1.17038e-17	n/a
HmN_000914300	n/a	5.2288	190.603	4.59333	6.78226e-20	GO:0016020; GO:0016021
HmN_000879100	Small nuclear ribonucleoprotein polypeptide	5.20586	1224.41	32.2367	6.20487e-115	GO:0000398; GO:0005681; GO:0019013; GO:0030529
HmN_000150800	Expressed protein	5.19652	1544.67	39.9367	4.02235e-134	GO:0046983
HmN_000103300	Acyl coenzyme A binding protein	5.18645	1411.57	35.7	8.42687e-91	GO:0000062
HmN_002232100	n/a	5.18227	740.683	19.8067	1.31952e-72	n/a
HmN_000964500	Feline leukemia virus subgroup C	5.18082	52.3167	0.706667	1.87873e-06	GO:0016020; GO:0016021
HmN_000304100	Protein dpy 30	5.17517	577.577	14.7233	5.23786e-59	n/a
HmN_000173300	Thymosin beta 4	5.16508	7547.89	208.007	1.07804e-244	GO:0003785; GO:0007015
HmN_000090000	H:ACA ribonucleoprotein complex subunit 3	5.15491	54.8867	0.74	3.30517e-06	GO:0001522; GO:0019013; GO:0030515; GO:0030529; GO:0042254; GO:0072588
HmN_002144800	n/a	5.14445	205.683	3.77	1.96639e-10	GO:0003735; GO:0006412; GO:0005622; GO:0005840
HmN_000219600	60S acidic ribosomal protein P2	5.13036	18212.1	487.553	3.8845e-48	GO:0003735; GO:0005622; GO:0005840; GO:0006414; GO:0030529
HmN_000061800	Stromal interaction molecule 1	5.1038	388.937	10.01	1.46772e-19	GO:0005622; GO:0006605; GO:0006886; GO:0015031; GO:0015450; GO:0016020; GO:0016021; GO:0071806
HmN_002205700	n/a	5.10339	27.5967	0	2.59201e-06	n/a
HmN_000583500	n/a	5.0673	85.4533	1.39333	2.07115e-09	n/a
HmN_000240300	Ribosomal protein L30	5.05154	1477.72	31.7167	3.01128e-11	GO:0003735; GO:0005622; GO:0005840; GO:0006412
HmN_000579700	Mitochondrial import inner membrane translocase	5.05114	1199.16	34.3167	3.14555e-93	GO:0005739; GO:0006810; GO:0015031; GO:0046872
HmN_002101000	Ribosomal protein lp1	5.02134	8224.37	246.587	2.0792e-110	GO:0003735; GO:0005622; GO:0005840; GO:0006414; GO:0030529
HmN_002189500	n/a	4.97053	1403.02	36.6533	2.29052e-16	GO:0003735; GO:0006412; GO:0005622; GO:0005840
HmN_002070300	n/a	4.96959	99.61	2.34667	1.85733e-11	n/a
HmN_000849900	Adenosine kinase	4.96315	235.803	7.42667	4.70746e-26	GO:0004001; GO:0006166; GO:0006167; GO:0016301; GO:0016310; GO:0016773
HmN_000012900	Tumor necrosis factor alpha induced protein	4.96289	24.6333	0	5.30468e-06	GO:0042981
HmN_000556000	n/a	4.95617	306.42	8.76667	5.61964e-34	n/a
HmN_000763200	Expressed protein	4.93425	1933.8	63.34	2.3529e-94	GO:0016020; GO:0016021
HmN_002042400	n/a	4.93113	859.053	26.7	3.05836e-85	GO:0005783; GO:0016021; GO:0072546
HmN_000430900	Ubiquitin supergroup	4.91905	107.06	2.41	6.12699e-09	GO:0005515
HmN_002214000	n/a	4.91781	375.507	12.1767	1.29731e-41	GO:0003676
HmN_000263800	n/a	4.90614	40.2133	0.463333	6.36394e-06	n/a
HmN_000494200	n/a	4.87281	75.82	1.88	6.70505e-09	GO:0016020; GO:0016021
HmN_000964400	n/a	4.86792	113.247	2.84	1.07316e-11	n/a
HmN_000541300	n/a	4.84552	372.953	11.48	4.07427e-35	n/a
HmN_002217700	n/a	4.83619	16889.7	578.4	1.44206e-116	GO:0003735; GO:0006412; GO:0005840; GO:0003723; GO:0005622; GO:0015935
HmN_002235700	n/a	4.82324	422.95	15.0067	1.88595e-46	n/a
HmN_000279600	Phd finger protein 10	4.82303	2914.46	100.64	8.34947e-242	GO:0008270; GO:0046872; GO:0003676
HmN_000393500	n/a	4.81756	143.207	4.80667	1.15386e-16	n/a
HmN_000399600	Expressed protein	4.81506	290.287	8.16333	2.65132e-29	GO:0016020; GO:0016021
HmN_002059900	n/a	4.8124	70.8767	1.39333	1.48536e-08	GO:0000902; GO:0006955; GO:0016020
HmN_000075700	n/a	4.8016	188.737	3.36	5.28765e-06	n/a
HmN_000272300	Elongator complex protein 3	4.76713	289.48	10.12	7.43923e-31	n/a
HmN_000501600	DNA replication licensing factor MCM4	4.76639	831.167	28.3933	7.95007e-36	GO:0003735; GO:0005622; GO:0005840; GO:0006412
HmN_002037500	n/a	4.74255	779.933	28.7733	1.10203e-72	n/a
HmN_000330000	Tetraspanin	4.73766	534.183	17.7333	2.82162e-50	GO:0016020; GO:0016021
HmN_002127000	n/a	4.72423	133.943	4.32	3.67581e-15	n/a
HmN_000630200	Lipopolysaccharide induced transcription factor	4.71016	1784.63	68.4233	5.26867e-142	n/a
HmN_000254100	Snrnp sm protein	4.67654	531.697	19.4467	6.09486e-60	GO:0000398; GO:0000956
HmN_002223300	n/a	4.673	360.427	12.8767	1.75765e-39	n/a
HmN_002211700	n/a	4.63882	204.867	8.07	5.09536e-23	n/a
HmN_000911300	60S ribosomal protein L28; Ribosomal protein L28	4.58255	13939.5	577.167	1.26852e-299	GO:0003735; GO:0005622; GO:0005840; GO:0006412
HmN_002214700	n/a	4.57888	3012.5	125.593	8.52501e-94	n/a
HmN_000548200	Histone H4	4.57162	4535.38	189.357	1.91631e-263	GO:0000786; GO:0003677; GO:0005634; GO:0005694; GO:0006334; GO:0046982; GO:0006352
HmN_000753600	40S ribosomal protein S11	4.57129	20236.6	850.51	0	GO:0003735; GO:0005622; GO:0005840; GO:0006412
HmN_002224200	n/a	4.56177	60.7333	1.91	9.16184e-08	n/a
HmN_000177000	Expressed protein	4.54057	475.793	20.13	1.65425e-51	GO:0016020; GO:0016021
HmN_000257300	28S ribosomal protein S25, mitochondrial	4.51981	276.623	6.78	2.81018e-06	GO:0005840
HmN_000507300	Guanine nucleotide-binding protein subunit gamma	4.50818	1363.73	61.0533	2.00619e-113	GO:0004871; GO:0005834; GO:0005886; GO:0007165; GO:0007186; GO:0016020
HmN_000777000	Expressed protein	4.4962	85.7467	3.32667	4.46914e-11	n/a
HmN_000845100	Zinc transporter zip8	4.47195	8038.68	354.737	6.29899e-171	GO:0005875; GO:0007017; GO:0016020; GO:0016021; GO:0030001; GO:0046873; GO:0055085; GO:0030286
HmN_002190700	n/a	4.46099	4597.56	206.157	2.28659e-155	GO:0045454; GO:0015035; GO:0006662
HmN_000390400	Ribosomal protein L40	4.44893	18995.9	862.48	0	GO:0003735; GO:0005840; GO:0006412; GO:0005515
HmN_000331600	Expressed protein	4.42577	755.123	34.0967	4.12283e-65	GO:0016020; GO:0016021
HmN_000797100	Deoxyribodipyrimidine photo lyase	4.42361	1094.02	50.5467	1.34039e-109	GO:0003904; GO:0006281; GO:0016829
HmN_000806900	n/a	4.40856	93.6567	3.61333	1.46673e-11	GO:0016020; GO:0016021
HmN_000515800	Lin 52	4.40636	804.94	38.1233	3.70711e-74	GO:0006351; GO:0007049; GO:0070176
HmN_000547600	n/a	4.38688	975.057	43.1133	1.11629e-50	GO:0003677; GO:0000786; GO:0046982
HmN_000888600	U6 snRNA associated Sm protein LSm7	4.38147	405.287	18.9367	1.64855e-37	GO:0000398; GO:0003723; GO:0005732; GO:0000956
HmN_000121400	Expressed conserved protein	4.36864	3509.18	167.997	2.59414e-229	n/a
HmN_000932900	n/a	4.36623	196.943	9.22333	7.91173e-21	GO:0016020; GO:0016021
HmN_000216200	n/a	4.35999	177.857	7.56333	2.52232e-20	GO:0016021
HmN_000591900	Aromatic amino acid decarboxylase	4.35639	1653.94	79.8533	2.19306e-168	GO:0003824; GO:0006520; GO:0016829; GO:0016831; GO:0019752; GO:0030170
HmN_000391400	Small nuclear ribonucleoprotein sm d3	4.35198	2856.7	136.637	1.19649e-102	GO:0006396; GO:0019013; GO:0030529; GO:0000387; GO:0005681
HmN_002194300	n/a	4.34712	385.05	18.4133	1.40716e-33	GO:0003735; GO:0006412; GO:0005622; GO:0005840
HmN_000583800	Expressed protein	4.33037	1275.81	63.2367	1.84885e-81	n/a
HmN_000480000	Ribosomal protein L31	4.33021	14385.7	705.233	8.2941e-125	GO:0003735; GO:0005622; GO:0005840; GO:0006412
HmN_002163700	n/a	4.32396	805.22	40.26	5.02714e-80	n/a
HmN_002006200	n/a	4.32327	736.887	35.8467	6.97555e-78	GO:0005506; GO:0016705; GO:0020037; GO:0055114
HmN_000383600	Ribosomal protein S15Aa	4.31694	20605.2	1017.79	2.68871e-122	GO:0003735; GO:0005840; GO:0006412; GO:0030529
HmN_000176900	n/a	4.29652	107.11	3.71667	8.11058e-12	GO:0016020; GO:0016021
HmN_002257900	n/a	4.29506	549.533	26.0267	1.84053e-53	n/a
HmN_000727900	Probable splicing factor 3B subunit 5	4.29122	906.143	44.13	1.01464e-70	GO:0000398
HmN_000652400	Barrier to autointegration factor	4.26917	1271.21	64.37	6.20452e-127	GO:0003677
HmN_002015200	n/a	4.26312	60.13	2.34667	2.75764e-08	n/a
HmN_000156500	Amine (Serotonin 5-HT) G protein-coupled receptor	4.25341	15524.7	808.963	9.13692e-269	GO:0004871; GO:0004930; GO:0007165; GO:0007186; GO:0016020; GO:0016021
HmN_000677500	n/a	4.24841	59.1933	2.37667	2.66701e-08	n/a
HmN_002103100	n/a	4.24668	489.967	24.8767	5.06735e-52	GO:0016021
HmN_002131200	n/a	4.23191	932.5	48.94	9.03177e-100	n/a
HmN_000526000	n/a	4.22895	200.71	10.0533	3.71335e-21	n/a
HmN_002026100	n/a	4.21915	1751.4	90.55	1.44135e-118	GO:0003952; GO:0005524; GO:0009435; GO:0006807
HmN_000717500	n/a	4.21777	69.1867	2.81	2.63253e-09	GO:0000166; GO:0005525; GO:0005622; GO:0007165; GO:0007264; GO:0016020; GO:0003924
HmN_000664700	N acetyltransferase 9	4.21076	14177.5	759.407	3.64485e-175	GO:0008080; GO:0008152; GO:0016740
HmN_000384200	Large subunit ribosomal protein 23	4.21071	22951	1179.6	2.72307e-34	GO:0003735; GO:0005840; GO:0006412; GO:0030529
HmN_002035200	n/a	4.16231	4109.14	226.987	2.54424e-145	n/a
HmN_000646600	Expressed conserved protein	4.14714	519.763	28.2033	3.71515e-61	GO:0005761
HmN_000036000	Ribosomal protein	4.13563	3773.41	201.313	4.25036e-25	GO:0003723; GO:0005840; GO:0030529; GO:0003735; GO:0006412; GO:0015934
HmN_000356900	Large subunit ribosomal protein L27Ae	4.12755	35220.3	1971.56	3.51196e-71	GO:0003735; GO:0005622; GO:0005840; GO:0006412; GO:0015934; GO:0030529
HmN_000789400	DNA-directed RNA polymerase subunit	4.12606	209.023	11.65	5.77983e-23	GO:0003676; GO:0003899; GO:0005634; GO:0005730; GO:0006351; GO:0008270; GO:0006379
HmN_000247300	Protein translation factor sui1	4.12542	3814.28	214.1	6.53825e-189	GO:0003743; GO:0006413
HmN_000717300	JNK interacting protein	4.11803	2334.65	132.477	1.09269e-118	GO:0003735; GO:0005622; GO:0005840; GO:0006412; GO:0030529
HmN_000770600	Expressed conserved protein	4.11604	2261.81	130.343	1.25302e-230	n/a
HmN_000789900	Protein lozenge	4.10949	1215.57	70.1233	4.59747e-136	GO:0003677; GO:0003700; GO:0005524; GO:0005634; GO:0006355
HmN_000842400	U6 snRNA associated protein	4.10923	306.313	16.54	2.90944e-34	GO:0000398; GO:0003723; GO:0005634; GO:0005681; GO:0005732; GO:0006397; GO:0008380; GO:0030529
HmN_000102700	Small nuclear ribonucleoprotein D1 polypeptide	4.10321	2169.54	124.17	1.55812e-115	GO:0006396; GO:0019013; GO:0030529; GO:0000387
HmN_000932000	40S ribosomal protein S16	4.0898	22894.1	1331.66	5.04198e-145	GO:0003735; GO:0005840; GO:0006412; GO:0030529
HmN_000583700	Expressed conserved protein	4.08271	3410.81	187.67	6.83055e-23	n/a
HmN_000421400	Expressed protein	4.07508	1115.74	64.91	3.66841e-96	n/a
HmN_000573300	Expressed protein	4.06951	898.713	53.52	2.24788e-94	GO:0016020; GO:0016021
HmN_000820900	Expressed protein	4.05302	310.173	18.25	5.50049e-33	n/a
HmN_000816200	60S ribosomal protein L14	4.04539	19601.5	1172.57	9.61669e-123	GO:0003735; GO:0005622; GO:0005840; GO:0006412
HmN_002148200	n/a	4.0411	372.983	21.57	1.32139e-41	GO:0003735; GO:0006412; GO:0005840
HmN_000800300	Expressed protein	4.0381	4373.7	259.513	1.00379e-111	n/a
HmN_000983400	n/a	4.03778	361.953	21.26	1.5523e-43	n/a
HmN_000632900	40S ribosomal protein S23	4.03763	12080.1	727.163	8.64635e-132	GO:0003735; GO:0005622; GO:0005840; GO:0006412; GO:0030529
HmN_000171300	Expressed protein	4.02537	533.23	32.63	3.19466e-56	n/a
HmN_002207100	n/a	4.02474	399.61	21.9367	6.28069e-38	n/a
HmN_000320700	Cyclin dependent kinase 2 associated protein	4.01218	366.92	21.7133	1.02445e-37	GO:0016301; GO:0016310
HmN_000732900	Transcription and mRNA export factor ENY2	3.99055	580.517	36.76	5.65455e-63	GO:0000124; GO:0003713; GO:0005634; GO:0005643; GO:0005654; GO:0006351; GO:0006355; GO:0006368; GO:0006406; GO:0006810; GO:0015031; GO:0016578; GO:0045893; GO:0051028; GO:0070390; GO:0071819
HmN_000016100	n/a	3.97688	676.903	42.2267	2.94531e-69	GO:0016020; GO:0016021
HmN_000652600	n/a	3.97077	2293.55	143.25	3.34541e-155	GO:0003677; GO:0000786; GO:0005634; GO:0046982
HmN_000425700	Expressed protein	3.95568	3653.62	231.823	1.34946e-130	GO:0046872; GO:0003676
HmN_000146600	Ewsr:fli fusion protein type	3.95237	359.863	22.4333	1.35687e-44	GO:0003677; GO:0003700; GO:0005634; GO:0006355; GO:0043565
HmN_002028000	n/a	3.95117	145.81	8.15333	2.27065e-13	n/a
HmN_000068700	n/a	3.95116	6489.18	412.61	7.79386e-82	GO:0003735; GO:0006414; GO:0005622; GO:0005840
HmN_000735000	Mitogen activated protein kinase kinase kinase	3.94008	2920.28	190.91	3.55321e-218	GO:0000166; GO:0004672; GO:0005524; GO:0006468; GO:0008270; GO:0016301; GO:0016310
HmN_000691400	Expressed conserved protein	3.93265	150.317	9.28333	5.54715e-20	n/a
HmN_000097400	Expressed protein	3.92388	1173.01	75.2333	2.90854e-100	n/a
HmN_000812300	Ubiquitin 40S ribosomal protein S27a	3.92082	31161.9	2029.31	3.64382e-99	GO:0003735; GO:0005840; GO:0006412; GO:0005515
HmN_002089200	n/a	3.9188	48.2933	2.65	6.91587e-07	n/a
HmN_000237200	Expressed conserved protein	3.90993	1959.84	130.507	3.90774e-160	n/a
HmN_000209500	Transcription elongation factor SPT4	3.90299	554.04	35.0367	6.53556e-57	GO:0005634; GO:0006351; GO:0006355; GO:0008270; GO:0032786
HmN_000396000	Small nuclear ribonucleoprotein Sm	3.90133	3172.59	208.363	4.5567e-142	GO:0008380; GO:0019013; GO:0030529; GO:0030532
HmN_000282700	Calcium binding mitochondrial carrier protein	3.89618	76.3733	4.22333	9.43107e-09	GO:0005509
HmN_000685700	Citrate synthase	3.88432	15784.7	1069.13	0	GO:0004108; GO:0006099; GO:0006101; GO:0016740; GO:0046912
HmN_000426400	Peptide (Tachykinin-like) G protein-coupled receptor	3.87409	135.397	8.51333	1.10724e-17	GO:0004930; GO:0004983; GO:0007186; GO:0007218; GO:0016020; GO:0016021
HmN_002212900	n/a	3.86142	44.8533	2.37667	7.98613e-07	GO:0005089; GO:0035023
HmN_000354600	Gag pol polyprotein	3.86024	380.81	25.03	1.29282e-42	GO:0003676; GO:0015074
HmN_000690300	6 pyruvoyl tetrahydrobiopterin synthase	3.84907	53.4933	3.08667	5.37111e-08	GO:0003874; GO:0006729
HmN_002223400	n/a	3.84102	588.273	41.5867	2.12843e-49	GO:0006813; GO:0006814; GO:0005890
HmN_000216900	n/a	3.83561	44.2433	2.41	1.01596e-06	n/a
HmN_000557400	Expressed protein	3.82336	795.527	54.49	1.7799e-63	GO:0016020; GO:0016021; GO:0070072
HmN_000889000	Cysteine rich protein 1	3.81873	544.9	37.4233	3.19525e-50	GO:0008270; GO:0046872
HmN_000892900	Heat shock protein DnaJ, N terminal	3.81086	453.553	31.6967	1.52958e-22	n/a
HmN_002186000	n/a	3.80729	130.19	8.79	2.37072e-16	n/a
HmN_000689300	Fibroblast growth factor receptor 1	3.79848	1797.05	125.263	3.61274e-72	GO:0016020; GO:0016021
HmN_000812800	Cyclin-dependent kinases regulatory subunit	3.78683	738.193	53.1533	4.53156e-78	GO:0007049; GO:0016301; GO:0016310; GO:0016538; GO:0045859; GO:0051301
HmN_000784300	NADH dehydrogenase	3.78544	476.32	32.54	1.75065e-49	n/a
HmN_000771100	Expressed conserved protein	3.77757	2712.8	197.527	3.70677e-220	n/a
HmN_000606900	Coiled coil helix coiled coil helix	3.77024	717.303	51.2633	4.00048e-62	GO:0032543; GO:0005761
HmN_000372100	Heat shock protein20 related protein	3.75365	553.357	40.2633	1.68596e-63	n/a
HmN_000772500	Deformed	3.75029	1226.42	90.4567	2.04394e-122	GO:0003677; GO:0003700; GO:0005634; GO:0006355; GO:0007275; GO:0043565
HmN_000387500	Cellular nucleic acid binding protein	3.74827	14752.2	1091.39	1.03065e-170	GO:0003676; GO:0008270; GO:0046872
HmN_000163800	RNA polymerase II transcriptional coactivator	3.74765	1423.99	105.043	6.2095e-115	GO:0003677; GO:0003713; GO:0006355
HmN_000790000	Protein lozenge	3.72986	878.913	67.1367	1.49784e-86	GO:0003677; GO:0003700; GO:0005524; GO:0005634; GO:0006355
HmN_000759100	DNA directed RNA polymerase II subunit rpb11 a	3.71606	963.75	72.5667	9.27639e-110	GO:0003677; GO:0003899; GO:0006351; GO:0046983
HmN_000592500	n/a	3.71356	636.857	45.5467	2.70818e-50	n/a
HmN_000069000	n/a	3.70524	127.717	8.76667	6.80317e-16	GO:0005179; GO:0005576; GO:0016020; GO:0016021
HmN_000657200	Peptidyl tRNA hydrolase PTRHD1	3.69279	663.83	50.0133	4.51071e-65	GO:0004045; GO:0008152; GO:0016787
HmN_002087500	n/a	3.67378	385.543	27.22	6.23181e-13	n/a
HmN_000845400	Orthopedia	3.66137	156.553	11.87	4.60431e-19	GO:0003677; GO:0005634; GO:0006355; GO:0043565
HmN_000612500	n/a	3.65893	45.56	2.32333	2.59159e-06	GO:0016020; GO:0016021
HmN_000926500	14 kDa subunit splicing factor 3b	3.65847	880.58	69.1733	1.61923e-99	GO:0000166; GO:0003676
HmN_002107700	n/a	3.65809	85.15	5.96	1.35215e-11	GO:0016021
HmN_000403100	Inosine-5'-monophosphate dehydrogenase	3.64122	160.887	10.34	1.08656e-06	GO:0003824; GO:0003938; GO:0006164; GO:0006177; GO:0016491; GO:0046872; GO:0055114
HmN_000646200	Ribosomal protein S19e	3.64004	20155.3	1599.21	5.75232e-107	GO:0003735; GO:0005840; GO:0006412
HmN_000675700	Expressed protein	3.64001	60.8633	3.98333	1.02848e-08	n/a
HmN_000582500	Amine oxidase	3.62542	1565.92	111.003	9.77609e-10	GO:0005507; GO:0008131; GO:0009308; GO:0016491; GO:0046872; GO:0048038; GO:0055114
HmN_000205400	n/a	3.62322	69.0567	5.03	1.54784e-09	n/a
HmN_000323100	Expressed protein	3.62095	919.547	73.9167	2.57242e-90	n/a
HmN_002020700	n/a	3.61995	1648.51	131.363	3.83661e-108	GO:0016651; GO:0022904; GO:0005743
HmN_000849700	Lethal (2) 06225	3.61734	2324.51	187.07	1.36288e-161	GO:0000276; GO:0015078; GO:0015986
HmN_002190500	n/a	3.61279	248.19	20.4933	5.5753e-25	n/a
HmN_000752500	F type H+ transporting ATPase subunit e	3.60612	1690.61	135.22	6.47884e-128	GO:0000276; GO:0015078; GO:0015986
HmN_000102000	60S ribosomal protein L21	3.6009	24854.3	2038.03	1.97303e-200	GO:0003735; GO:0005622; GO:0005840; GO:0006412
HmN_000154400	n/a	3.59978	143.247	11.7467	1.65151e-18	n/a
HmN_002084100	n/a	3.59094	255.34	19.6367	2.99948e-31	n/a
HmN_002015300	n/a	3.5761	60.5133	4.47	6.76456e-08	n/a
HmN_002228100	n/a	3.57117	36.5833	2.34667	9.24523e-06	n/a
HmN_002223700	n/a	3.56281	86.89	6.86333	8.57283e-09	n/a
HmN_002186900	n/a	3.55615	102.45	8.11	6.55557e-13	n/a
HmN_000757500	Ubiquitin-related modifier 1 homolog	3.55428	586.25	48.4167	2.09569e-67	GO:0002098; GO:0005737; GO:0005829; GO:0008033; GO:0032447; GO:0034227
HmN_002248200	n/a	3.54938	867.677	74.24	1.49955e-39	n/a
HmN_000416600	n/a	3.54858	432.147	36.77	1.70707e-47	GO:0005515
HmN_000819900	Programmed cell death protein 5	3.54642	1805.87	150.613	2.11043e-53	GO:0003677
HmN_002204000	n/a	3.53419	219.187	17.9733	7.79951e-18	n/a
HmN_000047600	Expressed conserved protein	3.52811	244.637	19.7667	4.16124e-29	n/a
HmN_000750200	Huntingtin interacting protein K	3.52785	495.71	42.0167	7.07646e-47	n/a
HmN_000138700	U6 snRNA associated Sm protein LSm4	3.52215	683.407	58.4	4.65855e-58	GO:0006396; GO:0000398; GO:0000956
HmN_000423900	Fgfr protein	3.50108	1124.93	95.9667	1.22631e-90	GO:0016020; GO:0016021
HmN_000416200	Replication association protein	3.49963	662.317	56.0533	1.68354e-51	GO:0006260; GO:0016779; GO:0016888; GO:0018142; GO:0019069; GO:0042025; GO:0042624
HmN_000214400	Expressed protein	3.49775	1085.38	94.0167	1.37865e-24	GO:0016020; GO:0016021; GO:0005515
HmN_000209700	LSM2, U6 small nuclear RNA associated	3.49456	522.697	44.32	2.91088e-33	GO:0006397
HmN_000279400	Ribosomal protein mitochondrial	3.48722	183.803	15.0967	5.9801e-22	GO:0005840
HmN_000706200	Expressed conserved protein	3.4849	178.23	15.4433	1.36003e-16	GO:0016020; GO:0016021
HmN_000416300	n/a	3.47737	2681.32	240.913	3.22545e-228	GO:0003723; GO:0003724; GO:0016779; GO:0016888; GO:0042624; GO:0006260; GO:0018142
HmN_000423200	Mitochondrial inner membrane organizing system	3.47317	1173.17	105.51	3.97609e-89	GO:0016020; GO:0016021; GO:0005743; GO:0061617
HmN_000183900	Neuropeptide	3.4662	61.0633	4.69	1.78278e-08	GO:0007218
HmN_002213500	n/a	3.45295	335.717	29.89	1.01579e-36	n/a
HmN_000505800	Expressed protein	3.44623	429.81	37.6833	1.42399e-47	GO:0005789; GO:0016020; GO:0016021
HmN_000760800	Dynein light chain	3.42913	5870.13	539.547	6.26849e-222	GO:0005875; GO:0007017; GO:0030286
HmN_000354700	40S ribosomal protein S18	3.42617	18335.1	1694.37	3.13042e-137	GO:0003676; GO:0003723; GO:0003735; GO:0005622; GO:0005840; GO:0006412; GO:0030529
HmN_000160900	RING box protein 1	3.4189	2009.26	183.92	3.06526e-66	GO:0008270
HmN_000380100	n/a	3.41731	59.2833	4.72333	4.20057e-08	n/a
HmN_002014600	n/a	3.39406	57.6133	4.75667	1.43235e-08	n/a
HmN_000122400	Cupin 2 barrel domain containing protein	3.3858	1896.85	176.797	9.86068e-46	n/a
HmN_000720100	Alkaline phosphatase	3.36589	628.553	58.4633	1.58015e-61	GO:0003824; GO:0004035; GO:0008152; GO:0016311; GO:0016787; GO:0016791
HmN_000448800	BarH-like 1	3.36023	159.707	15.15	8.42088e-18	GO:0003677; GO:0005634; GO:0006355; GO:0043565
HmN_000242300	n/a	3.35895	851.817	83.5833	1.33465e-73	n/a
HmN_002182800	n/a	3.353	2471.04	236.903	1.36677e-91	GO:0004170; GO:0046080
HmN_000212300	DNA directed RNA polymerases I, II, and III	3.3501	1452.71	140.837	1.22666e-66	GO:0003677; GO:0003899; GO:0005634; GO:0005665; GO:0006351
HmN_000747700	POU domain protein	3.34396	130.32	12.9067	4.83777e-14	GO:0003677; GO:0003700; GO:0005634; GO:0006351; GO:0006355; GO:0043565
HmN_000227200	n/a	3.34105	270.873	24.2467	2.25441e-21	n/a
HmN_002293100	n/a	3.33559	339.357	32.7767	3.22438e-36	n/a
HmN_000116700	Sec61 beta subunit	3.33396	3629.89	355.723	6.17333e-179	GO:0005784; GO:0006886; GO:0016020; GO:0016021
HmN_002016700	n/a	3.33111	61.5267	5.22	2.8531e-08	n/a
HmN_000914700	Serine:threonine protein phosphatase 2A	3.33093	49.2467	4.29	2.02836e-07	n/a
HmN_002013900	n/a	3.33041	310.5	30.8433	9.46355e-36	GO:0003998
HmN_000762200	Expressed protein	3.3298	3469.56	341.07	8.43975e-74	GO:0005524; GO:0005737; GO:0006457
HmN_000737100	ETS transcription factor Elf 2	3.30883	131.407	13.1833	8.08928e-12	GO:0000975; GO:0003677; GO:0003700; GO:0005634; GO:0006355; GO:0043565; GO:0044212
HmN_000425400	n/a	3.30637	248.66	25.3133	3.96697e-20	n/a
HmN_000598500	Mitochondrial ATP synthase coupling factor 6	3.30035	2759.12	279.28	5.9781e-122	GO:0000276; GO:0015078; GO:0015986
HmN_002164500	n/a	3.28724	61.4067	6.04333	1.88321e-08	GO:0004842; GO:0005680
HmN_000290900	n/a	3.28103	305.08	30.9033	1.08683e-33	n/a
HmN_002003300	n/a	3.27757	3324.22	341.89	1.61526e-203	GO:0000387; GO:0000398; GO:0005685; GO:0008270; GO:0003676; GO:0005634
HmN_002110100	n/a	3.27184	144.51	13.1933	2.86132e-14	n/a
HmN_000101600	Acyl carrier protein	3.25809	2348.42	242.07	2.22785e-103	GO:0006633
HmN_000874900	Transcription factor SOX 14	3.23533	8390.32	888.8	4.61396e-201	n/a
HmN_000136600	Cationic amino acid transporter	3.23491	2296.61	239.93	4.88728e-110	GO:0003333; GO:0015171; GO:0016020; GO:0016021; GO:0022857; GO:0055085
HmN_000110100	n/a	3.23241	132.67	13.51	1.02282e-16	GO:0003700; GO:0043565; GO:0006355
HmN_000557600	Signal recognition particle 19 kDa protein	3.22947	541.71	56.13	2.08821e-52	GO:0006614; GO:0008312; GO:0048500
HmN_000033600	Kinesin-like protein	3.2276	2706.53	286.62	1.57742e-158	GO:0000166; GO:0003777; GO:0005524; GO:0005871; GO:0005874; GO:0007018; GO:0008017; GO:0008152
HmN_000081000	Expressed protein	3.22755	668.547	69.11	3.40396e-65	GO:0016020; GO:0016021; GO:0006486
HmN_000044800	V-type proton ATPase subunit F	3.22563	1031.76	109.617	4.65125e-89	GO:0006810; GO:0006811; GO:0015991; GO:0015992; GO:0033180; GO:0034220; GO:0046961
HmN_000381300	NADH dehydrogenase (Ubiquinone) 1 alpha	3.22143	1547.53	163.917	4.03163e-96	GO:0005743; GO:0008137; GO:0042773
HmN_000578000	n/a	3.21906	2229.9	236.95	1.33879e-149	GO:0055085; GO:0016021
HmN_002090100	n/a	3.21857	249.603	25.5167	1.79217e-23	n/a
HmN_002232400	n/a	3.21769	5666.43	607.35	2.66854e-216	n/a
HmN_000007600	Cysteine rich PDZ binding protein	3.21642	690.62	71.7933	3.47257e-63	n/a
HmN_000722100	n/a	3.21418	123.33	12.01	7.78953e-15	GO:0016020; GO:0016021
HmN_000041800	Urea active transporter protein	3.20583	47.6667	4.77333	2.99395e-06	GO:0016020; GO:0016021; GO:0015204; GO:0071918
HmN_000021800	n/a	3.19568	24683.1	2678.01	2.23358e-121	n/a
HmN_000563900	Mitochondrial 28S ribosomal protein S32 (S32mt)	3.19091	591.753	63.9667	4.20792e-43	GO:0005840
HmN_000177100	n/a	3.18851	101.143	10.7633	1.77153e-13	GO:0016020; GO:0016021
HmN_002143000	n/a	3.18149	2192.92	241.51	1.85424e-157	GO:0000387; GO:0005681; GO:0016491; GO:0055114
HmN_000950100	60S ribosomal protein L27	3.17823	16939.6	1853.27	2.3822e-77	GO:0003735; GO:0005622; GO:0005840; GO:0006412
HmN_000107450	n/a	3.17693	884.763	96.9633	4.8592e-78	GO:0005739; GO:0005747
HmN_000336400	40s ribosomal protein s15	3.17224	22481.8	2464.36	1.92754e-59	GO:0003723; GO:0003735; GO:0005840; GO:0006412; GO:0015935; GO:0030529
HmN_002073800	n/a	3.17011	190.527	19.7	4.7368e-21	GO:0007017; GO:0030286
HmN_000663300	Expressed protein	3.16383	1725.19	193.8	9.49421e-109	GO:0005515
HmN_000502400	Expressed protein	3.16021	368.203	39.3867	3.88613e-37	n/a
HmN_000545700	Small subunit ribosomal protein s30e	3.15377	16690	1861.84	5.93545e-99	GO:0003735; GO:0005622; GO:0005840; GO:0006412
HmN_000305100	Membrane associated guanylate kinase, WW and PDZ	3.14889	336.813	36.09	4.00934e-35	GO:0016301; GO:0016310; GO:0005515
HmN_000165200	Expressed protein	3.14433	253.587	28.13	1.9002e-22	GO:0016020; GO:0016021
HmN_002124800	n/a	3.14075	250.42	28.3067	1.14806e-28	n/a
HmN_000627700	HMG transcription factor SoxB1	3.13659	331.203	37.1267	8.03677e-17	n/a
HmN_000055800	n/a	3.13596	160.847	17.4733	4.89519e-19	n/a
HmN_000477400	Neuroglobin	3.13516	67.5233	6.06333	3.86265e-07	GO:0005344; GO:0006810; GO:0015671; GO:0019825; GO:0020037
HmN_002028500	n/a	3.10682	169.267	19.3967	4.85594e-15	GO:0003700; GO:0043565; GO:0006355
HmN_000081200	Isochorismatase domain containing protein 2	3.10675	80.17	8.91667	3.53171e-10	GO:0003824; GO:0008152; GO:0005515
HmN_000506900	Syndecan binding protein (Syntenin)	3.09936	964.88	113.577	3.40757e-53	GO:0005515
HmN_000620600	Prefoldin subunit 6	3.08457	1361.46	159.147	1.90329e-67	GO:0006457; GO:0016272; GO:0051082
HmN_000617900	Dihydropyrimidinase 2	3.08378	3425.85	401.923	5.09768e-143	GO:0008152; GO:0016787; GO:0016810
HmN_000547700	n/a	3.0819	79.2933	9.03333	4.71277e-10	GO:0033566; GO:0008274
HmN_000636500	Lamino associated polypeptide	3.08118	1798.98	211.52	2.68925e-143	GO:0016020; GO:0016021
HmN_000604400	Histone H1 delta	3.08048	18630.6	2195.68	4.06272e-277	GO:0000786; GO:0003677; GO:0005634; GO:0005694; GO:0006334
HmN_000720900	Signal recognition particle 14 kDa protein	3.07128	1281.44	153.523	2.55281e-103	GO:0005786; GO:0006614; GO:0008312; GO:0030942; GO:0048500
HmN_002286800	n/a	3.06654	682.503	82.2833	8.94933e-67	GO:0008121; GO:0009055
HmN_000648000	Cryptochrome 1	3.06531	1335.86	161.043	5.97041e-86	n/a
HmN_000270700	Tyrosine protein kinase pr2	3.05743	5793.39	694.463	7.08433e-292	GO:0016301; GO:0016310
HmN_000591600	n/a	3.05553	805.71	93.5167	4.86442e-55	GO:0005509; GO:0007156; GO:0016020; GO:0007155; GO:0005886
HmN_000794300	Expressed protein	3.0453	152.647	18.5833	2.68796e-12	n/a
HmN_000842600	n/a	3.04294	196.54	23.1733	5.76496e-23	n/a
HmN_000849500	E3 ubiquitin protein ligase TRIM9	3.03623	930.627	111.257	1.28608e-83	GO:0005622; GO:0008152; GO:0008270; GO:0016874; GO:0046872; GO:0005515
HmN_000585400	n/a	3.0343	155.967	18.57	6.56958e-19	n/a
HmN_000573100	Transcription elongation factor b polypeptide 1	3.03151	1837.31	223.083	6.36497e-121	GO:0003746; GO:0006414; GO:0006511
HmN_000724900	NADH dehydrogenase (Ubiquinone) 1 beta	3.02526	2479.6	301.537	9.7537e-101	GO:0005739; GO:0008137; GO:0016020; GO:0016021; GO:0055114
HmN_002183500	n/a	3.01789	1084.09	133.893	4.86983e-80	n/a
HmN_002198900	n/a	3.01732	583.12	71.36	5.18859e-64	n/a
HmN_000729400	26s protease regulatory subunit s10b	3.01354	195.077	22.3433	1.46233e-08	GO:0000166; GO:0005524; GO:0005737; GO:0006508; GO:0008233; GO:0016787; GO:0030163; GO:0036402
HmN_000899300	40S ribosomal protein S13	3.01112	18544.3	2275.59	6.78362e-58	GO:0003735; GO:0005622; GO:0005840; GO:0006412
HmN_000766100	Corepressor interacting with RBPJ 1	3.01078	2951.14	362.6	1.13115e-131	GO:0006457; GO:0016272; GO:0051082
HmN_000639400	Delta-like protein	2.99683	1697	210.377	2.95867e-116	GO:0005509; GO:0007154; GO:0007275; GO:0016020; GO:0016021; GO:0005515
HmN_000955200	Cold shock protein, DNA binding	2.98814	980.93	121.977	1.79089e-82	GO:0003676; GO:0003677; GO:0006355
HmN_000432500	Nadh dehydrogenase (Ubiquinone) alpha	2.9808	1850.48	232.81	3.77717e-73	GO:0008137; GO:0009055; GO:0016020; GO:0055114
HmN_000371800	Expressed protein	2.97192	2549.78	320.25	1.09863e-88	GO:0016020; GO:0016021
HmN_000393800	Nucleolin	2.96725	6095.65	779.46	3.83924e-191	GO:0000166; GO:0003676
HmN_002200400	n/a	2.96706	88.6767	9.92	1.64825e-10	n/a
HmN_000858000	Succinate coenzyme A ligase, GDP forming, beta subunit	2.96437	85.3067	9.42	1.19954e-07	GO:0003824; GO:0005524; GO:0008152; GO:0016874; GO:0006099
HmN_002231400	n/a	2.96267	166.007	20.3933	6.12949e-20	GO:0022900; GO:0005739; GO:0005747
HmN_000157500	NADH dehydrogenase	2.957	1093.05	139.017	2.27653e-82	n/a
HmN_000433700	Zinc finger protein 84	2.93971	4946.88	640.803	1.35875e-207	GO:0003676; GO:0046872
HmN_000126600	n/a	2.93462	774.92	100.63	4.29081e-41	n/a
HmN_000421600	cAMP responsive element binding protein	2.92499	1006.23	133.683	1.97119e-91	n/a
HmN_000753500	Protocadherin 11	2.92338	947.7	125.43	2.30772e-68	GO:0005509; GO:0005886; GO:0007155; GO:0007156; GO:0016020; GO:0016021
HmN_002025200	n/a	2.92214	139.233	17.5033	4.87735e-14	GO:0005515
HmN_000062700	Cyclin dependent kinase 1	2.9162	131.217	15.8433	2.07872e-14	GO:0000166; GO:0004672; GO:0005524; GO:0006468; GO:0016301; GO:0016310
HmN_000703000	Translocator protein	2.89374	4740.94	629.84	1.47983e-66	GO:0016020; GO:0016021
HmN_000069600	Eukaryotic initiation factor 4A III	2.88898	456.1	59.6	4.49545e-12	GO:0000166; GO:0003676; GO:0003743; GO:0004386; GO:0005524; GO:0006413; GO:0016787
HmN_000319200	Expressed conserved protein	2.88481	1298.99	176.28	2.70825e-44	n/a
HmN_000389600	Protocadherin 1	2.88442	690.9	93.4267	6.91567e-54	GO:0005509; GO:0005886; GO:0007155; GO:0007156; GO:0016020; GO:0016021
HmN_000010600	n/a	2.8832	78.8933	10.6067	1.98492e-09	n/a
HmN_000044100	Expressed protein	2.87719	1228.14	163.93	4.58929e-81	n/a
HmN_000413100	Ribosomal protein L34a	2.8708	21940.3	2952.03	1.22756e-33	GO:0003735; GO:0005622; GO:0005840; GO:0006412
HmN_002072100	n/a	2.85947	257.29	35.9233	2.35179e-26	n/a
HmN_002092400	n/a	2.85565	315.25	41.94	1.8588e-33	n/a
HmN_000536300	Tubulin gamma chain	2.85501	72.0167	9.52667	8.46789e-09	GO:0000166; GO:0000930; GO:0003924; GO:0005525; GO:0005874; GO:0007017; GO:0007020; GO:0008152; GO:0031122
HmN_002119400	n/a	2.85459	321.49	43.54	1.64668e-36	GO:0000398; GO:0005688; GO:0046540
HmN_000346900	RNA directed DNA polymerase	2.85142	970.56	131.907	5.52058e-88	GO:0003677; GO:0003721
HmN_000568700	Expressed conserved protein	2.84999	253.583	33.8533	4.28949e-27	n/a
HmN_002112600	n/a	2.84612	206.243	27.8933	1.27026e-21	n/a
HmN_000991400	Cadherin, putative	2.84316	865.957	121.073	1.76568e-59	GO:0005509; GO:0005886; GO:0007155; GO:0007156; GO:0016020; GO:0016021
HmN_000052600	Actin depolymerizing factor	2.81307	8671.26	1229.82	9.5133e-105	GO:0003779; GO:0005622; GO:0015629; GO:0030042
HmN_000429600	Zinc finger, FLYWCH type	2.81118	1749.33	248.823	1.24272e-147	GO:0046872; GO:0003676
HmN_000232800	Monocyte to macrophage differentiation protein	2.80864	67.81	9.54667	1.80896e-07	GO:0016020; GO:0016021; GO:0019835
HmN_000098500	Eri1 exoribonuclease 3	2.80166	139.81	19.01	1.32114e-14	GO:0003676
HmN_000101000	60S ribosomal protein L18a	2.7954	28517.3	4060	1.37906e-41	GO:0003735; GO:0005840; GO:0006412; GO:0030529
HmN_000692200	Expressed conserved protein	2.78253	401.64	57.02	7.11601e-16	GO:0016020; GO:0016021
HmN_000051100	Expressed protein	2.77953	263.207	37.2067	7.60375e-26	n/a
HmN_000680200	Leucine rich repeat containing protein 15	2.7771	3087.26	449.73	2.58608e-64	GO:0016020; GO:0016021; GO:0005515
HmN_000050800	n/a	2.77512	161.47	22.9733	1.21339e-14	n/a
HmN_000776400	KH domain containing, RNA binding, signal	2.76434	14864.2	2186.08	0	GO:0003676; GO:0003723
HmN_000670200	Centrosomal protein of 135 kDa	2.7531	1608.26	236.013	5.7772e-127	GO:0007099; GO:0010457
HmN_000022900	Dynein light chain	2.74834	833.073	123.91	1.22812e-69	GO:0005875; GO:0007017; GO:0030286
HmN_000439100	Gag pol polyprotein	2.74116	473.843	69.23	5.53454e-38	GO:0003676
HmN_000193000	Cytidine deaminase	2.73704	1212.35	181.413	1.73349e-54	GO:0003824; GO:0004126; GO:0008270; GO:0009972
HmN_001019900	n/a	2.73606	63.39	8.25	9.6222e-08	n/a
HmN_000259600	n/a	2.72802	1041.75	157.15	8.65909e-67	GO:0016020; GO:0016021
HmN_000925400	Expressed conserved protein	2.72256	808.907	120.56	7.38369e-64	GO:0032008; GO:0071230; GO:0071986
HmN_000595200	Frizzled	2.72059	1874.6	281.487	4.63078e-123	GO:0007166; GO:0007275; GO:0016020; GO:0016021; GO:0016055; GO:0042813; GO:0005515
HmN_000642100	DNA polymerase epsilon subunit 3	2.7172	588.95	87.5867	1.9948e-51	GO:0005634; GO:0046982
HmN_000643000	Ras gtpase	2.71713	279.937	41.9033	7.07123e-15	GO:0000166; GO:0003924; GO:0005525; GO:0005622; GO:0006886; GO:0006913; GO:0007165; GO:0007264; GO:0008152; GO:0015031; GO:0016020
HmN_000334400	Expressed conserved protein	2.70553	379.107	57.8133	3.26517e-24	n/a
HmN_000602100	Procollagen lysine,2 oxoglutarate 5 dioxygenase	2.6985	3830.7	587.82	7.79554e-61	GO:0005506; GO:0016491; GO:0016705; GO:0031418; GO:0051213; GO:0055114
HmN_002181400	n/a	2.68677	1989.23	305.56	2.05004e-42	GO:0003677; GO:0000786; GO:0046982
HmN_000283600	Peptidyl prolyl cis trans isomerase	2.68437	2571.74	397.277	1.61721e-101	GO:0000413; GO:0003755; GO:0008152; GO:0016853; GO:0005515
HmN_000084500	Serine:threonine protein kinase KDX1	2.67272	3629.37	563.967	1.25088e-66	GO:0003824; GO:0016301; GO:0016310
HmN_000903300	Expressed protein	2.66851	514.207	80.4267	1.0315e-28	GO:0016020; GO:0016021
HmN_000647800	Coiled coil domain containing protein 102B	2.66621	876.667	136.383	2.46401e-73	n/a
HmN_000792600	Beta tubulin	2.66383	1934.86	305.463	2.33462e-125	GO:0000166; GO:0003924; GO:0005200; GO:0005525; GO:0005874; GO:0007017; GO:0008152
HmN_000259500	Caspase 8	2.66003	1297.74	200.4	2.21668e-26	GO:0004197; GO:0006508; GO:0006915; GO:0008234; GO:0005515
HmN_002157500	n/a	2.65812	545.49	84.85	2.74788e-41	n/a
HmN_000579100	Ubiquitin fold modifier 1	2.65637	1141.64	177.73	2.01265e-47	n/a
HmN_000287100	n/a	2.65071	793.057	126.503	1.25156e-41	n/a
HmN_002030100	n/a	2.64575	358.203	55.8	5.45175e-19	n/a
HmN_000266900	n/a	2.63826	188.77	29.1333	1.5692e-19	n/a
HmN_000681200	VWFA and cache domain containing protein 1	2.63813	6077.12	972.047	1.02715e-199	GO:0016020; GO:0016021
HmN_000631300	Zinc finger, C2H2 type	2.63531	833.16	134.513	6.98684e-67	GO:0046872; GO:0003676
HmN_000111300	Eukaryotic translation initiation factor 5A	2.62889	32398.5	5188.47	2.69597e-43	GO:0003723; GO:0003743; GO:0003746; GO:0006412; GO:0006413; GO:0006452; GO:0043022; GO:0045901; GO:0045905
HmN_000108600	Zinc finger protein	2.62863	1538.83	248.043	1.04073e-89	GO:0003676; GO:0046872
HmN_000764500	Fatty acid binding protein FABP2	2.60483	52301.4	8555.39	4.86186e-84	GO:0005215; GO:0006810; GO:0008289
HmN_000808100	n/a	2.60041	272.223	43.79	1.29419e-26	n/a
HmN_000798900	Pre mRNA splicing factor SPF27	2.59621	59.69	9.18667	1.11064e-06	GO:0006397
HmN_000004400	n/a	2.59501	227.46	37.4133	1.05693e-21	GO:0016849; GO:0009190; GO:0035556; GO:0004672; GO:0006468; GO:0005524
HmN_002278300	n/a	2.59495	141.48	22.0433	3.96547e-15	GO:0003723
HmN_000100200	n/a	2.59435	94.5667	14.4833	1.06436e-08	n/a
HmN_000328300	Expressed conserved protein	2.59199	720.607	117.55	1.6784e-61	n/a
HmN_000278100	Protein-tyrosine-phosphatase	2.57451	88.67	13.53	5.89834e-09	GO:0004721; GO:0004725; GO:0006470; GO:0016311; GO:0016787; GO:0016791; GO:0035335
HmN_000311000	Forkhead box protein D1	2.57079	808.3	135.917	5.4003e-33	GO:0003677; GO:0003700; GO:0005634; GO:0006351; GO:0006355; GO:0043565
HmN_000424000	Centrin 2	2.56649	103.86	17.1433	1.7555e-09	GO:0005509
HmN_000733800	G:T mismatch specific thymine DNA glycosylase	2.56394	1711.6	285.79	2.02567e-87	GO:0006281; GO:0016799; GO:0005515; GO:0019104
HmN_000286400	n/a	2.56119	747.347	124.437	2.43969e-17	n/a
HmN_000054200	Protein odd skipped	2.55633	484.153	79.16	4.72424e-23	GO:0003676; GO:0046872
HmN_000629400	Gag pol polyprotein	2.54874	79.2367	13.2033	4.24813e-09	GO:0003676; GO:0015074
HmN_000490700	Expressed conserved protein	2.54871	701.13	117.61	7.63814e-29	n/a
HmN_000527300	Tubulin specific chaperone A	2.54703	2435.84	413.937	4.46433e-92	GO:0007021; GO:0015631; GO:0051082; GO:0048487; GO:0007023
HmN_000271100	n/a	2.54341	71.0433	10.33	8.23782e-06	GO:0043066
HmN_000273900	Eukaryotic translation initiation factor 3 subunit G	2.54307	218.467	34.91	3.62534e-07	GO:0000166; GO:0001731; GO:0003676; GO:0003723; GO:0003743; GO:0005737; GO:0005852; GO:0006412; GO:0006413; GO:0006446; GO:0016282; GO:0033290
HmN_000326000	Putative adam (A disintegrin and metalloprotease)	2.54201	3898.53	670.13	1.41579e-129	GO:0004222; GO:0006508; GO:0007229; GO:0008233; GO:0008237; GO:0008270; GO:0016020; GO:0016021
HmN_000157100	28S ribosomal protein S33, mitochondrial	2.54139	911.8	155.323	1.72126e-66	GO:0005840
HmN_000808600	n/a	2.5335	2442.98	416.783	2.07061e-80	GO:0005102; GO:0007275; GO:0016055; GO:0005576
HmN_000553800	Transcription factor sum	2.52034	919.94	158.333	9.05773e-75	GO:0003677; GO:0005634; GO:0006355; GO:0007517; GO:0046983
HmN_000333500	Expressed protein	2.51532	298.667	50.1733	2.63483e-24	n/a
HmN_002168500	n/a	2.51454	113.117	19.31	7.10301e-11	n/a
HmN_000801500	GATA binding factor 2	2.51075	593.697	102.28	1.29864e-19	GO:0003700; GO:0005634; GO:0006355; GO:0008270; GO:0030097; GO:0043565
HmN_000744800	ATP synthase assembly factor FMC1, mitochondrial	2.50792	354.53	61.6433	3.04128e-33	n/a
HmN_000861100	Immunoglobulin	2.50292	820.517	145.027	5.76992e-65	GO:0016020; GO:0016021
HmN_000175500	BC026374 protein (S09 family)	2.49381	696.82	124.2	2.36717e-47	GO:0004104; GO:0008152
HmN_000680300	Forkhead box protein J3	2.49061	134.303	22.3633	4.77582e-12	GO:0003677; GO:0003700; GO:0005634; GO:0006351; GO:0006355; GO:0043565
HmN_000012300	Superoxide dismutase	2.48627	12831.2	2287.68	2.03609e-134	GO:0004784; GO:0006801; GO:0016491; GO:0019430; GO:0046872; GO:0055114
HmN_000860400	ATP binding cassette sub family G	2.47679	1715.52	306.413	8.98814e-109	GO:0000166; GO:0005524; GO:0008152; GO:0016020; GO:0016021; GO:0016887
HmN_002226500	n/a	2.47548	1619.1	290.1	1.54624e-46	GO:0007186; GO:0019236
HmN_000433500	n/a	2.47053	1119.12	199.023	8.70512e-48	GO:0007165
HmN_000371900	Expressed protein	2.46787	8196.56	1476.59	1.55561e-201	GO:0016020; GO:0016021
HmN_000595800	Cleavage stimulation factor subunit 1	2.4551	384.14	70.1467	6.67561e-33	GO:0005515
HmN_000698600	n/a	2.45442	189.37	33.0967	9.52096e-10	GO:0005509; GO:0005544
HmN_000513200	n/a	2.45144	330.853	60.5167	2.7669e-27	GO:0005216; GO:0006811; GO:0055085; GO:0016020
HmN_000322400	Lachesin	2.45048	452.237	81.6667	1.95e-38	n/a
HmN_000623300	Histone H3	2.44854	43510.4	7915.67	1.12792e-46	GO:0000786; GO:0003677; GO:0005634; GO:0005694; GO:0046982
HmN_000892300	LIM:homeobox protein Lhx4	2.44381	56.7267	10.0233	4.48858e-07	GO:0003677; GO:0008270; GO:0046872
HmN_002123600	n/a	2.43438	29769.9	5482.34	2.15626e-72	n/a
HmN_000227100	Frizzled	2.43197	4782.81	883.383	1.91487e-105	GO:0004888; GO:0007166; GO:0007275; GO:0016020; GO:0016021; GO:0016055; GO:0005515; GO:0042813
HmN_000629500	Gag pol polyprotein	2.42788	62.7033	11.05	1.00651e-06	n/a
HmN_000213200	Protocadherin fat 3	2.4251	387.607	70.76	2.91428e-36	GO:0005509; GO:0005886; GO:0007155; GO:0007156; GO:0016020; GO:0016021
HmN_000274200	Small GTPase Ras dva 3	2.4199	270.063	49.3167	4.43898e-22	GO:0000166; GO:0005525; GO:0005622; GO:0007165; GO:0007264; GO:0015031; GO:0016020; GO:0003924
HmN_000428300	Expressed conserved protein	2.41946	779.67	145.003	8.74856e-46	GO:0016020; GO:0016021
HmN_000188500	Arginine:serine rich splicing factor	2.41566	2249.65	420.94	5.37701e-55	GO:0000166; GO:0003676; GO:0008270; GO:0046872
HmN_002164300	n/a	2.41544	336.837	62.4767	3.52879e-26	n/a
HmN_000248600	Mitogen-activated protein kinase	2.41323	1269.85	237.86	4.93833e-95	GO:0000165; GO:0000166; GO:0004672; GO:0004674; GO:0004707; GO:0005524; GO:0005622; GO:0006468; GO:0016301; GO:0016310; GO:0016740
HmN_000231700	Tctex 1	2.40772	258.94	47.1733	2.35999e-20	n/a
HmN_000327200	Reactive oxygen species modulator 1	2.40523	675.927	126.17	2.5788e-50	GO:0016020; GO:0016021
HmN_000797500	Mitochondrial import receptor subunit TOM20	2.40301	1927.17	360.353	7.39893e-46	GO:0005742; GO:0006605; GO:0006886
HmN_002169400	n/a	2.39886	101.303	17.9667	9.93256e-09	GO:0003677; GO:0005524; GO:0008094; GO:0006281
HmN_000278000	n/a	2.39877	84.2833	15.6967	2.01568e-09	n/a
HmN_000233500	Dolichyl-diphosphooligosaccharide--protein glycosyltransferase subunit DAD1	2.39839	2538.05	479.343	6.20185e-92	GO:0004579; GO:0005783; GO:0005789; GO:0005840; GO:0006486; GO:0008250; GO:0016020; GO:0016021; GO:0016740
HmN_000029000	n/a	2.3947	409.403	74.97	2.18759e-24	n/a
HmN_000682700	Expressed conserved protein	2.39467	1078.16	202.247	7.121e-29	n/a
HmN_000191500	n/a	2.38877	103.06	18.1267	1.06764e-08	n/a
HmN_000305300	Expressed protein	2.38855	1138.87	213.99	1.11162e-23	n/a
HmN_000675800	Expressed protein	2.38165	66.0233	12.42	1.98785e-06	n/a
HmN_000280100	Anosmin 1	2.37941	863.35	161.41	5.27413e-25	GO:0005515
HmN_002159100	n/a	2.36968	784.34	150.61	8.18364e-46	n/a
HmN_000096000	Vesicular acetylcholine transporter	2.36064	508.357	97.5033	9.61696e-39	GO:0016020; GO:0016021; GO:0055085
HmN_000533200	Mediator of RNA polymerase II transcription	2.35519	1047.45	204.58	1.07548e-67	GO:0001104; GO:0006355; GO:0006357; GO:0016592
HmN_000320300	Peptidyl-prolyl cis-trans isomerase	2.35458	714.653	135.057	1.08286e-11	GO:0000413; GO:0003755; GO:0006457; GO:0016853
HmN_002038500	n/a	2.35303	320.58	63.02	4.85635e-23	GO:0003824; GO:0005975
HmN_000930300	Complex 1 LYR protein	2.35054	1714.19	333.317	2.45924e-38	GO:0006120; GO:0005747
HmN_002122700	n/a	2.34204	79.2833	14.63	5.05762e-08	GO:0016021
HmN_000436600	n/a	2.32776	93.48	18.25	1.04915e-08	n/a
HmN_000085900	Programmed cell death protein 2	2.32669	215.95	41.1	4.07947e-17	GO:0005737; GO:0046872
HmN_000472400	Cytochrome c	2.32663	1314.27	261.59	8.49026e-71	GO:0005739; GO:0009055; GO:0020037; GO:0046872; GO:0055114; GO:0070469
HmN_000688500	Thioredoxin protein 4a	2.32281	1255.62	250.027	2.70344e-55	GO:0000398; GO:0005681
HmN_002016300	n/a	2.32094	89.17	18.03	4.50228e-08	n/a
HmN_000630800	Universal stress protein	2.31995	3009.93	598.8	3.19703e-37	GO:0006950
HmN_000776500	Cys loop ligand gated ion channel subunit	2.3189	540.627	108.31	1.0474e-47	GO:0005230; GO:0005886; GO:0006810; GO:0006811; GO:0016020; GO:0016021; GO:0030054; GO:0034220; GO:0045202; GO:0004888; GO:0005216
HmN_000488800	SAM domain containing protein	2.31418	340.907	68.12	3.45768e-30	GO:0005515
HmN_002205100	n/a	2.31374	1983.28	395.927	4.97238e-27	GO:0007017; GO:0030286
HmN_000845000	Dnl2 protein	2.30052	1997.02	399.597	1.15313e-32	GO:0005875; GO:0007017; GO:0030286
HmN_000820000	Krueppel factor 5	2.29467	1092.59	223.977	1.63734e-44	GO:0003676; GO:0046872
HmN_000064500	Nephrin	2.28905	655.633	133.447	3.87946e-37	GO:0016020; GO:0016021; GO:0005515
HmN_000366800	n/a	2.28707	95.3167	18.6967	6.99088e-09	GO:0055085; GO:0016021
HmN_000839900	Glycylpeptide N-tetradecanoyltransferase	2.28672	89.0667	17.9167	2.3972e-07	GO:0004379; GO:0006499; GO:0016740; GO:0016746
HmN_002044700	n/a	2.28589	548.423	111.34	1.86186e-34	n/a
HmN_002248400	n/a	2.28572	91.4967	18.0833	6.98916e-10	n/a
HmN_002180400	n/a	2.28568	2589.89	530.863	4.6745e-132	GO:0005085; GO:0007264
HmN_000430100	Expressed protein	2.28033	1103.54	227.573	1.48962e-65	GO:0016020; GO:0016021
HmN_000811700	ADP ribosylation factor 2	2.27846	938.18	191.327	3.70672e-40	GO:0000166; GO:0005525; GO:0005622; GO:0005794; GO:0006810; GO:0007264; GO:0015031
HmN_000344200	n/a	2.27041	8052.52	1667.96	1.46216e-200	GO:0003677; GO:0005524; GO:0016787; GO:0000287; GO:0008253; GO:0005737; GO:0004386; GO:0008270; GO:0000184
HmN_000871800	DNA-directed RNA polymerase subunit	2.26854	590.723	121.747	2.52078e-42	GO:0003676; GO:0003677; GO:0003899; GO:0005634; GO:0005730; GO:0006351; GO:0008270; GO:0046872; GO:0006379
HmN_000773100	Glycosyltransferase protein LARGE2	2.26669	121.06	23.14	5.51716e-07	GO:0008152; GO:0016740; GO:0016757
HmN_000448500	Pangolin	2.26529	1225.21	250.453	1.1322e-39	GO:0005634; GO:0006355; GO:0006357; GO:0016055
HmN_000217500	40S ribosomal protein S2	2.26506	53311.9	11072.7	1.29732e-133	GO:0003723; GO:0003735; GO:0005840; GO:0006412; GO:0015935; GO:0030529
HmN_000807400	Coiled coil domain containing protein	2.25955	208.427	42.1033	4.47695e-17	n/a
HmN_000661100	von Willebrand factor A domain containing protein	2.25861	210.54	42.63	9.90979e-18	n/a
HmN_000930400	Pleckstrin y	2.25704	1802.13	375.477	6.08884e-61	GO:0005856
HmN_000321700	Dynein light chain, type 1 2	2.25535	846.28	174.553	9.07913e-26	GO:0005875; GO:0007017; GO:0030286
HmN_000692900	DNA directed rna polymerase II subunit n	2.25485	571.3	120.353	3.11451e-42	GO:0003677; GO:0003899; GO:0006351; GO:0008270
HmN_002145100	n/a	2.25304	1169.67	245.087	2.38846e-72	n/a
HmN_000722700	n/a	2.25141	1033.62	215.167	2.08799e-47	GO:0016020; GO:0016021
HmN_000681700	Expressed conserved protein	2.25064	2410.21	505.527	3.81068e-75	GO:0016020; GO:0016021
HmN_000769800	Calcium activated potassium channel subunit	2.249	182.423	37.7067	1.51039e-15	GO:0016020; GO:0016021; GO:0015269; GO:0006813
HmN_000314300	n/a	2.24292	3424.34	721.13	2.47521e-136	GO:0016849; GO:0009190; GO:0035556
HmN_002156200	n/a	2.23604	1397.71	292.14	4.30833e-45	GO:0005634
HmN_000106500	Splicing factor, arginine:serine rich 2	2.23566	4869.29	1032.47	2.8222e-125	GO:0000166; GO:0003676; GO:0003677; GO:0003700; GO:0005634; GO:0006351; GO:0006355; GO:0008270; GO:0043401; GO:0043565; GO:0046872
HmN_000241200	NAChR subunit	2.22471	836.017	179.327	7.11833e-27	GO:0005216; GO:0005230; GO:0005886; GO:0006810; GO:0006811; GO:0016020; GO:0016021; GO:0030054; GO:0034220; GO:0045202; GO:0045211; GO:0098655; GO:0004888; GO:0022848
HmN_000553700	RAB interacting factor	2.22224	22748.3	4865.28	5.68181e-133	n/a
HmN_002119300	n/a	2.22097	3146.39	668.513	9.91752e-31	n/a
HmN_000108500	Zinc finger protein	2.21897	1032.35	220.833	5.41699e-51	GO:0003676; GO:0046872
HmN_000068300	39S ribosomal protein L54, mitochondrial	2.21745	1003.73	214.577	2.32433e-39	GO:0005840
HmN_000585600	Zinc finger BED domain containing protein	2.21381	1010.07	217.02	7.36078e-65	GO:0003676; GO:0003677; GO:0046983
HmN_000102200	60S ribosomal protein L21	2.21334	1063.06	230.103	1.6123e-65	GO:0005840
HmN_000208300	Transcription factor SOX 6	2.21035	1210.91	260.043	5.11895e-74	GO:0005515; GO:0003677; GO:0006355; GO:0007275
HmN_000451700	Lipoma HMGIC fusion partner	2.20966	587.26	126.973	3.37475e-45	GO:0016020; GO:0016021
HmN_000712700	n/a	2.19882	842.263	182.363	1.32957e-59	n/a
HmN_000707100	Aldo keto reductase family 1, member B4	2.19315	2046.3	447.39	6.31198e-88	GO:0016491; GO:0055114
HmN_002187200	n/a	2.19011	905.52	198.09	9.83384e-41	n/a
HmN_002002600	n/a	2.18843	803.997	175.047	1.58644e-45	n/a
HmN_000969500	Protocadherin 9	2.1863	1510.36	329.96	1.40126e-88	GO:0005509; GO:0005886; GO:0007155; GO:0007156; GO:0016020; GO:0016021
HmN_000646700	Immunogenic protein	2.18284	114.177	25.2167	8.94352e-08	GO:0005509
HmN_000137200	Nuclear factor interleukin-3-regulated protein isoform 2	2.1752	2361.82	517.97	7.29982e-65	GO:0003700; GO:0006355; GO:0043565
HmN_000118900	Phosphate transporter	2.17257	1712.53	379.877	6.02851e-32	GO:0005315; GO:0006817; GO:0016020; GO:0016021; GO:0055085
HmN_002039400	n/a	2.16855	420.053	91.9767	2.07588e-24	n/a
HmN_000102300	60S ribosomal protein L21	2.15808	5822.84	1304.9	2.74143e-104	GO:0003824; GO:0005840; GO:0008152; GO:0030170
HmN_000356500	n/a	2.15426	242.63	52.22	6.67363e-14	GO:0016020; GO:0016021
HmN_000275600	Dynein light chain	2.15383	191.13	41.3533	5.37339e-11	GO:0005875; GO:0007017; GO:0030286
HmN_000726700	Transmembrane protein SKG6	2.15242	263.05	59.1333	2.22728e-12	GO:0016020; GO:0016021
HmN_000359200	Serine:threonine protein kinase PFTAIRE 1	2.15134	468.29	104.36	8.65682e-36	GO:0000166; GO:0004672; GO:0005524; GO:0006468; GO:0016301; GO:0016310
HmN_000874700	Isocitrate dehydrogenase	2.14984	2557.41	578.453	2.41928e-101	GO:0000287; GO:0004449; GO:0005739; GO:0006099; GO:0016491; GO:0016616; GO:0046872; GO:0051287; GO:0055114
HmN_000692700	DNA directed RNA polymerases I, II, and III	2.14874	69.6633	14.8733	9.69982e-07	GO:0003677; GO:0003899; GO:0006351; GO:0008270
HmN_002158000	n/a	2.14549	4787.19	1071.31	1.26108e-24	GO:0015293; GO:0016021
HmN_000781000	Mediator complex subunit 28	2.14511	776.943	175.257	2.32534e-51	n/a
HmN_000046600	Guanine nucleotide-binding protein subunit gamma	2.14484	2579.38	581.703	1.83523e-68	GO:0004871; GO:0005834; GO:0005886; GO:0007165; GO:0007186; GO:0016020
HmN_000391800	n/a	2.13639	839.177	190.42	2.81123e-46	GO:0005515
HmN_000629300	Expressed protein	2.13187	76.5267	16.67	1.68235e-07	n/a
HmN_000005900	Dihydrolipoyllysine residue acetyltransferase	2.13136	8695.24	1975.75	3.45996e-54	GO:0008152; GO:0016740
HmN_002107200	n/a	2.12616	192.63	42.9267	5.35478e-17	n/a
HmN_000767700	Histone H2A	2.12077	5611.16	1286.05	3.21416e-77	GO:0000786; GO:0003677; GO:0003735; GO:0005622; GO:0005634; GO:0005694; GO:0005840; GO:0006412; GO:0046982
HmN_002004900	n/a	2.11501	690.723	156.003	4.8643e-22	n/a
HmN_000385000	Expressed protein	2.11196	661.57	153.583	1.97855e-31	GO:0005515
HmN_000598700	Thioredoxin, mitochondrial	2.11055	2381.24	551.027	3.11665e-57	GO:0005623; GO:0006662; GO:0015035; GO:0045454; GO:0055114
HmN_000197400	Major facilitator superfamily domain containing protein	2.10599	1290.28	299.42	5.81323e-76	GO:0006810; GO:0016020; GO:0016021; GO:0055085
HmN_000105700	Expressed protein	2.10426	529.787	122.513	1.32742e-23	n/a
HmN_000832200	Expressed conserved protein	2.09777	747.2	173.187	1.11965e-42	n/a
HmN_000600400	Tetraspanin	2.09499	452.18	105.403	7.8255e-27	GO:0016020; GO:0016021
HmN_000270800	Voltage gated potassium channel	2.09254	322.137	74.7933	3.95148e-27	GO:0000155; GO:0000160; GO:0005216; GO:0005249; GO:0005622; GO:0006810; GO:0006811; GO:0006813; GO:0016020; GO:0016021; GO:0023014; GO:0034220; GO:0055085; GO:0071805
HmN_000321600	Dynein light chain, type 1 2	2.09018	854.077	197.01	5.59524e-31	GO:0005875; GO:0007017; GO:0030286
HmN_000797900	Glutaredoxin 1	2.0865	718.547	166.497	2.75172e-47	GO:0005623; GO:0009055; GO:0015035; GO:0045454; GO:0055114
HmN_000247400	Expressed protein	2.08545	1919.8	448.213	7.39766e-25	n/a
HmN_000435100	Uroporphyrinogen decarboxylase	2.08517	1064.1	249.703	3.85926e-65	GO:0004853; GO:0006779; GO:0006782; GO:0016829; GO:0016831
HmN_000728500	Transporter SVOPL	2.08295	218.377	49.61	1.64968e-16	GO:0016020; GO:0016021; GO:0022857; GO:0055085
HmN_000404100	Expressed conserved protein	2.08039	66.24	14.9333	6.99688e-07	GO:0016020; GO:0016021
HmN_000709700	n/a	2.07832	1361.85	322.977	7.51045e-44	n/a
HmN_000797400	50S ribosomal protein L20	2.07767	1028.53	241.037	3.21292e-59	GO:0003735; GO:0005622; GO:0005840; GO:0006412; GO:0019843; GO:0030529
HmN_000522400	Reversed polarity	2.07708	858.307	202.197	3.36475e-39	GO:0003677; GO:0005634; GO:0006355; GO:0043565
HmN_000656300	Phosphoacetylglucosamine mutase	2.07465	7597.25	1802.52	5.54036e-188	GO:0000287; GO:0005975; GO:0016868; GO:0071704
HmN_000833800	Expressed protein	2.07036	684.853	159.17	7.14178e-20	GO:0016020; GO:0016021
HmN_000071600	Mitochondrial 50S ribosomal protein L41	2.06554	103.617	24.6967	2.59721e-07	GO:0005840
HmN_002052800	n/a	2.06402	1189.25	284.68	7.3313e-65	n/a
HmN_000331700	n/a	2.06114	2250.75	537.387	8.28547e-63	GO:0004781; GO:0000103; GO:0004020; GO:0005524
HmN_000642300	Expressed conserved protein	2.0606	1607.56	384.203	1.11825e-43	n/a
HmN_002098800	n/a	2.05939	255.453	58.95	1.74358e-11	GO:0016491; GO:0055114
HmN_000748900	Vesicular glutamate transporter	2.05452	1119.02	268.373	1.21991e-57	GO:0016020; GO:0016021; GO:0055085
HmN_000164300	von Willebrand factor A domain containing protein	2.04906	132.553	31.8567	2.86254e-11	n/a
HmN_000184000	Zinc finger protein	2.04097	207.447	49.5933	1.27434e-14	GO:0003676; GO:0046872
HmN_000738700	n/a	2.03813	450.567	109.64	5.31251e-34	GO:0003777; GO:0005524; GO:0008017; GO:0007018
HmN_000210400	Proteasome subunit beta type 6	2.03385	3187.19	775.403	7.57311e-64	GO:0000502; GO:0004298; GO:0005839; GO:0051603; GO:0043161
HmN_000612000	Sodium:potassium dependent atpase beta subunit	2.03319	892.653	219.087	3.04565e-52	GO:0005890; GO:0006813; GO:0006814
HmN_000453200	Expressed protein	2.03249	4822.66	1168.33	2.24065e-25	n/a
HmN_000907100	Protein tiptop	2.03224	1860.04	450.257	1.62744e-70	GO:0010468; GO:0046872; GO:0003676; GO:0000122; GO:0048730; GO:0048749
HmN_000114700	Mitochondrial ribosomal protein L55	2.03216	434.503	106.653	1.87951e-26	GO:0005840; GO:0003735; GO:0005762
HmN_000078200	Islet	2.02499	498.28	121.4	3.74398e-21	GO:0003677; GO:0005634; GO:0006355; GO:0008270; GO:0043565; GO:0046872
HmN_000865600	Tata box binding protein	2.02333	3335.67	816.67	1.97921e-59	GO:0003677; GO:0003735; GO:0005622; GO:0005840; GO:0006352; GO:0006412
HmN_000323300	Cathepsin l cysteine peptidase	2.01502	4422.51	1085.95	5.62141e-38	GO:0006508; GO:0008233; GO:0008234; GO:0016787
HmN_000644600	Phosphatidylinositol transfer protein alpha	2.01369	154.353	37.3733	7.21043e-09	GO:0005622; GO:0006810; GO:0005548; GO:0015914
HmN_000607500	n/a	2.01299	604.547	150.263	1.67115e-38	GO:0003723; GO:0003676
HmN_000845800	n/a	2.01131	107.58	26.3	7.45326e-08	n/a
HmN_000007100	Thioredoxin	2.00979	438.69	109.347	4.4198e-18	GO:0005623; GO:0006662; GO:0015035; GO:0045454; GO:0055114
HmN_000834800	Integrin linked protein kinase	2.00902	16049.5	3981.91	9.87371e-92	GO:0003746; GO:0005853; GO:0006412; GO:0006414; GO:0007229; GO:0016301; GO:0016310
HmN_000032100	Protein SAAL1	2.00602	262.633	64.1567	1.24696e-21	GO:0005488
HmN_000734800	Protocadherin 1	2.00324	1193.53	298.727	5.49023e-40	GO:0005509; GO:0005886; GO:0007155; GO:0007156; GO:0016020; GO:0016021
HmN_000245400	Expressed protein	2.00241	3362.47	833.773	1.09001e-31	GO:0043231; GO:0051537
HmN_000529000	High affinity choline transporter 1	2.00212	138.623	34.0333	7.16162e-12	GO:0005215; GO:0006810; GO:0016020; GO:0016021; GO:0055085; GO:0022857
HmN_002125100	n/a	1.99825	53256.1	13305.2	7.32486e-89	GO:0003735; GO:0006412; GO:0005622; GO:0005840; GO:0015935
HmN_000883100	n/a	1.99755	89.69	21.94	3.25539e-08	n/a
HmN_000567400	Tricarboxylate transport protein	1.99689	1109.83	275.843	1.05571e-56	GO:0006810; GO:0016020; GO:0016021; GO:0055085
HmN_000167400	Expressed conserved protein	1.9943	1150.64	287.33	1.24396e-61	GO:0005515
HmN_000619200	n/a	1.99403	465.44	115.863	1.49911e-25	n/a
HmN_000327800	EF HAND 1, calcium binding site	1.99386	115.373	28.72	1.60739e-09	GO:0005509
HmN_002224600	n/a	1.99178	37121.7	9326.73	5.2099e-147	n/a
HmN_000062500	LAG1 longevity assurance 4	1.99169	703.11	174.207	6.0541e-39	GO:0005783; GO:0016020; GO:0016021
HmN_000712200	Gag pol polyprotein	1.98596	18928	4751.81	5.23885e-34	n/a
HmN_000136700	Cationic amino acid transporter	1.98511	479.637	116.813	4.36668e-07	GO:0003333; GO:0015171; GO:0016020; GO:0016021; GO:0022857; GO:0055085
HmN_000760700	Dynein light chain	1.98136	1225.91	308.21	1.86426e-32	GO:0005875; GO:0007017; GO:0030286
HmN_000668400	Zinc finger protein	1.97995	318.197	79.9267	3.48376e-19	GO:0003676; GO:0046872
HmN_000710500	MYB	1.97503	746.31	191.03	2.87627e-35	n/a
HmN_002044300	n/a	1.97477	29085.3	7390.94	2.7114e-152	GO:0006334; GO:0005634
HmN_000185600	Protocadherin 1	1.97422	1740.58	440.4	1.23438e-64	GO:0005509; GO:0005886; GO:0007155; GO:0007156; GO:0016020; GO:0016021
HmN_002247900	n/a	1.97322	330.107	82.18	1.12227e-17	GO:0003676
HmN_002026400	n/a	1.9692	700.457	175.893	8.62479e-30	n/a
HmN_000190900	Dedicator of cytokinesis protein	1.96562	1710.91	438.733	6.95332e-86	GO:0005085; GO:0005622; GO:0007264; GO:0043547
HmN_000690400	Radial spokehead l	1.96163	260.873	66.1533	1.70718e-11	n/a
HmN_000948300	Inositol monophosphatase	1.96157	1561.14	403.013	8.1053e-62	GO:0046854
HmN_000367500	Amino acid transporter	1.95861	8202.61	2105.77	2.23718e-88	GO:0006810; GO:0006835; GO:0015293; GO:0016020; GO:0016021; GO:0017153; GO:0055085
HmN_000758100	Prefoldin subunit 4	1.95741	2008.73	514.887	2.95355e-51	GO:0006457; GO:0016272; GO:0051082
HmN_000311400	n/a	1.95608	118.037	28.93	1.19707e-08	n/a
HmN_000682000	n/a	1.95566	1768.83	457.77	1.21118e-51	GO:0005515; GO:0004672; GO:0006468; GO:0005524; GO:0004713
HmN_000150700	n/a	1.9543	388.793	98.3567	1.32175e-25	GO:0051260
HmN_000686900	NHP2 non histone chromosome protein 2 1	1.95329	963.86	245.52	2.59058e-13	GO:0003723; GO:0005730; GO:0030529; GO:0042254
HmN_000206700	Transformer 2 protein beta	1.95304	2523.15	653.17	3.60156e-58	GO:0000166; GO:0003676
HmN_000881100	Tissue factor pathway inhibitor 2	1.94583	506.53	131.263	1.49928e-34	GO:0004867; GO:0010951
HmN_000261700	Triosephosphate isomerase	1.93979	1416.52	368.637	8.59009e-63	GO:0006457; GO:0008152; GO:0016272; GO:0016853; GO:0051082
HmN_000151600	Expressed protein	1.93644	1688.58	439.127	4.78442e-42	GO:0003677; GO:0003700; GO:0006355; GO:0006357; GO:0043565
HmN_000034100	n/a	1.93434	643.137	164.593	2.20384e-09	GO:0003676; GO:0008270
HmN_000204500	Pdz domain containing protein	1.92766	2133.14	558.283	1.29034e-100	GO:0005515
HmN_000992200	Expressed protein	1.92487	141.497	35.3167	6.58794e-07	GO:0016020; GO:0016021
HmN_002007100	n/a	1.92112	379.92	97.8667	2.27468e-14	n/a
HmN_000568900	Expressed protein	1.91801	141.117	36.46	7.58852e-09	n/a
HmN_000725400	Protein preY, mitochondrial	1.91248	172.273	46.0733	3.1708e-13	n/a
HmN_000496300	Rhomboid-like protein	1.9108	1144.45	305.38	1.70544e-62	GO:0004252; GO:0006508; GO:0008233; GO:0016020; GO:0016021; GO:0016787
HmN_000166600	Neuroglian	1.90685	563.41	150.67	1.56017e-34	GO:0016020; GO:0016021; GO:0005515
HmN_002199600	n/a	1.9056	99.0633	25.9433	6.90639e-06	n/a
HmN_000614000	Glycerol-3-phosphate dehydrogenase	1.9027	2513.9	669.417	1.14969e-36	GO:0004367; GO:0005975; GO:0006072; GO:0009331; GO:0016491; GO:0016616; GO:0042803; GO:0046168; GO:0051287; GO:0055114
HmN_000079500	n/a	1.89992	259.04	67.64	3.79587e-12	n/a
HmN_000433900	n/a	1.88877	615.56	163.38	6.00895e-21	GO:0016020; GO:0016021
HmN_000726800	Connective tissue growth factor	1.8843	262.64	71.8567	3.388e-18	n/a
HmN_000718800	Roundabout 2	1.88168	1267.83	343.037	7.4034e-47	GO:0016020; GO:0016021; GO:0005515
HmN_000795000	Netrin receptor DCC	1.8777	2040.92	554.993	5.50353e-80	GO:0016020; GO:0016021; GO:0005515
HmN_002196700	n/a	1.87662	360.823	98.87	1.45142e-17	GO:0006366; GO:0046982
HmN_000646500	Expressed protein	1.87648	151.447	41.03	1.1692e-08	GO:0016020; GO:0016021
HmN_002189200	n/a	1.87536	309.37	83.5367	1.16388e-18	n/a
HmN_000368800	n/a	1.87519	1184.28	318.533	1.44209e-32	GO:0005515
HmN_000530900	Guanine nucleotide binding protein subunit	1.87497	45692	12452.3	1.34606e-254	GO:0005515
HmN_000094800	Cysteine rich secretory protein LCCL	1.87474	186.227	49.8133	2.94028e-13	GO:0003735; GO:0005840; GO:0006412; GO:0019843
HmN_000275700	Dynein light chain	1.87427	1088.05	293.4	1.05384e-16	GO:0005875; GO:0007017; GO:0030286
HmN_002274600	n/a	1.87388	172.207	46.6433	2.7509e-13	GO:0008285; GO:0016573; GO:0005634; GO:0070776
HmN_000511600	Coiled coil domain containing protein 39	1.87273	271.257	73.39	5.19201e-17	GO:0003341; GO:0036159; GO:0005930
HmN_000592000	RhoGAP	1.87061	433.83	115.957	5.73133e-18	GO:0007165
HmN_000077200	E3 ubiquitin-protein ligase	1.87029	4151.1	1132.03	4.54361e-129	GO:0004842; GO:0005634; GO:0006511; GO:0007275; GO:0008270; GO:0016567; GO:0016874; GO:0046872; GO:0005515
HmN_000374500	Ras protein Rap 2a	1.86519	300.21	81.1933	4.10575e-19	GO:0000166; GO:0005525; GO:0005622; GO:0007165; GO:0007264; GO:0015031; GO:0016020; GO:0003924
HmN_000100800	Dna repair endonuclease xpf	1.86131	279.99	77.5433	1.66834e-18	GO:0003677; GO:0004518; GO:0004519; GO:0006259; GO:0090305
HmN_000028300	n/a	1.85719	297.027	82.6867	7.3654e-17	n/a
HmN_000174100	T box transcription factor tbx2	1.8568	901.76	248.93	2.13101e-48	GO:0003677; GO:0003700; GO:0005634; GO:0006351; GO:0006355
HmN_000510100	Protocadherin gamma B1	1.85574	333.573	90.2133	1.4182e-21	GO:0005509; GO:0005886; GO:0007155; GO:0007156; GO:0016020; GO:0016021
HmN_000846100	Vacuolar protein sorting associated protein	1.85501	2167.45	600.377	8.39011e-94	GO:0005623; GO:0006904; GO:0016192
HmN_000278900	n/a	1.85491	109.22	30.0733	6.15159e-08	n/a
HmN_000365100	ADP dependent glucokinase	1.85401	6263.61	1730.7	4.8658e-132	GO:0005975; GO:0008270; GO:0016301; GO:0016310; GO:0016773; GO:0046872
HmN_000323900	Ubiquitin	1.85387	701.54	192.44	3.09323e-12	GO:0005515
HmN_000165500	Expressed conserved protein	1.85039	115.163	31.1933	5.15104e-07	n/a
HmN_000410300	Sperm associated antigen 6	1.84759	347.093	96.8167	2.01093e-20	GO:0043248; GO:0005515; GO:0005488
HmN_000468800	40S ribosomal protein S10	1.84647	21806.8	6026.17	8.1212e-23	GO:0005840
HmN_000358100	Cadherin	1.84641	698.85	193.473	2.13939e-34	GO:0005509; GO:0005886; GO:0007155; GO:0007156; GO:0016020; GO:0016021
HmN_000734300	Growth factor independence	1.84303	208.77	55.99	5.27232e-07	GO:0003676; GO:0046872; GO:0006355
HmN_002090600	n/a	1.83974	3370.61	942.763	1.25983e-66	n/a
HmN_000137600	Ileal sodium:bile acid cotransporter	1.8397	290.507	79.8333	3.12707e-21	GO:0016020; GO:0016021
HmN_000051400	n/a	1.83946	447.397	125.093	4.30936e-25	GO:0005509; GO:0007156; GO:0016020; GO:0007155; GO:0005886
HmN_000307300	Paxillin	1.83858	554.033	152.807	1.05882e-29	GO:0008270; GO:0046872
HmN_000539200	Ribosomal protein L19	1.83714	5545.64	1545.03	1.7532e-88	GO:0003735; GO:0005622; GO:0005840; GO:0006412; GO:0030529; GO:0022625
HmN_000095900	n/a	1.83437	474.207	133.607	1.00705e-24	GO:0008152; GO:0016740; GO:0016746
HmN_000521400	p53 transcription factor, DNA binding	1.83276	474.597	134.32	3.43893e-22	GO:0003677; GO:0003700; GO:0005634; GO:0006355; GO:0006915
HmN_000797200	Tumor protein p63	1.83172	2286.69	639.56	6.49444e-48	GO:0003677; GO:0003700; GO:0005634; GO:0006355; GO:0006915; GO:0044212
HmN_000523600	Expressed protein	1.82438	341.733	95.1667	6.84576e-13	n/a
HmN_000175200	40S ribosomal protein RPS27	1.82387	6378.96	1803.1	3.40855e-121	GO:0003735; GO:0005622; GO:0005840; GO:0006412; GO:0016020; GO:0016021
HmN_000112200	Protein Wnt	1.82372	166.41	46.22	8.45011e-11	GO:0005102; GO:0005576; GO:0005578; GO:0007275; GO:0016055
HmN_000759700	n/a	1.82338	5360.51	1516.18	1.17809e-81	GO:0016209; GO:0016491; GO:0055114; GO:0051920; GO:0045454
HmN_000147000	n/a	1.81739	161.56	45.44	5.58128e-12	n/a
HmN_000212000	SCO cytochrome oxidase deficient protein 1	1.81472	7232.03	2056.8	1.45584e-117	GO:0016020; GO:0016021; GO:0045454
HmN_002155500	n/a	1.8091	1496.77	424.573	6.54157e-58	GO:0003824
HmN_000463000	Ubiquinol cytochrome c reductase complex	1.80874	1426.18	408.05	1.36734e-48	n/a
HmN_000831400	n/a	1.8078	472.69	134.58	7.17522e-32	GO:0016020; GO:0016021
HmN_000654500	Hydroxyacyl coenzyme a dehydrogenase	1.79793	1032.75	294.92	1.3785e-45	GO:0003857; GO:0006631; GO:0016491; GO:0055114; GO:0070403
HmN_000484400	DNAj subfamily C member	1.79782	464.097	132.773	3.68712e-27	GO:0016020; GO:0016021
HmN_000199600	Transcription factor BTF3	1.79496	12326.7	3527.65	1.27295e-19	n/a
HmN_000633800	Histone H2A	1.79058	777.18	225.773	3.53234e-20	GO:0000786; GO:0003677; GO:0005634; GO:0005694; GO:0046982
HmN_000002900	n/a	1.78116	37043.7	10772.5	4.7558e-179	GO:0003723; GO:0003735; GO:0006412; GO:0005622; GO:0005840
HmN_000115400	HD domain containing protein 2	1.7775	485.597	142.803	3.14029e-17	n/a
HmN_000878200	Thymidylate kinase	1.77623	615.8	176.793	3.07552e-30	GO:0004798; GO:0005524; GO:0006233; GO:0016301; GO:0016310; GO:0046939
HmN_000421100	Phosphoserine phosphatase	1.77491	316.983	93.3667	1.34131e-19	GO:0004647; GO:0006564; GO:0008152; GO:0016311; GO:0016791
HmN_000326600	Down syndrome cell adhesion molecule	1.77302	5244.78	1527.94	6.90935e-74	GO:0016020; GO:0016021; GO:0005515
HmN_000268700	Coiled coil domain containing protein	1.7718	288.65	83.4233	2.53524e-15	n/a
HmN_000215900	n/a	1.77061	21844.4	6369.2	2.93581e-26	GO:0004177; GO:0006508; GO:0005622; GO:0008235; GO:0030145; GO:0019538; GO:0005737
HmN_000109300	n/a	1.77008	540.19	157.163	1.07154e-29	GO:0004672; GO:0005524; GO:0006468
HmN_000573200	Ribosomal protein L24	1.76811	28748.1	8419.14	4.35502e-45	GO:0005840
HmN_000656900	Expressed protein	1.76437	126.61	36.8967	1.68797e-09	n/a
HmN_000661600	Calcium binding protein	1.76351	1170.94	341.903	5.02579e-24	GO:0005509
HmN_000113900	n/a	1.76224	191.52	55.4867	1.45099e-13	n/a
HmN_000309200	n/a	1.75975	1318.61	386.65	3.94749e-27	GO:0016020; GO:0016021
HmN_000011600	Clathrin light chain a	1.75587	742.463	219.63	1.3582e-39	GO:0005198; GO:0006886; GO:0016192; GO:0030130; GO:0030132
HmN_002005000	n/a	1.75438	304.453	88.89	1.46763e-15	GO:0005509
HmN_000409500	NK1	1.75263	508.713	149.26	7.93741e-31	GO:0003677; GO:0005634; GO:0006355; GO:0043565
HmN_000334800	Expressed conserved protein	1.75099	939.437	276.647	5.12636e-20	n/a
HmN_000063100	Malate dehydrogenase	1.74872	15449.1	4594.43	3.67688e-105	GO:0003824; GO:0005975; GO:0006099; GO:0006108; GO:0016491; GO:0016615; GO:0016616; GO:0019752; GO:0030060; GO:0055114
HmN_000541800	Mps one binder kinase activator 3	1.74603	4581.2	1366.18	1.50159e-109	GO:0016301; GO:0016310
HmN_002287700	n/a	1.74289	419.003	122.68	4.50118e-11	n/a
HmN_000075200	Nst1p protein	1.74095	407.94	121.28	6.1652e-24	n/a
HmN_000202800	Small nuclear ribonucleoprotein associated	1.73832	4396	1318.76	3.44764e-68	GO:0019013; GO:0030529
HmN_000122500	Nicotinic acetylcholine receptor subunit alpha 8	1.732	281.327	84.35	3.05564e-09	GO:0005216; GO:0005230; GO:0005886; GO:0006810; GO:0006811; GO:0016020; GO:0016021; GO:0030054; GO:0034220; GO:0045202; GO:0045211; GO:0098655; GO:0004888; GO:0022848
HmN_000900400	n/a	1.73082	230.337	69.4567	4.5043e-15	n/a
HmN_002109700	n/a	1.72918	1057.51	317.1	9.03974e-50	GO:0016779; GO:0009058
HmN_000172200	Protein stoned B	1.72684	1734.62	519.58	2.90818e-26	GO:0006897
HmN_002272800	n/a	1.72611	708.65	215.103	2.54583e-32	n/a
HmN_000680700	Innexin	1.72526	400.427	120.403	9.57802e-25	GO:0005886; GO:0005921; GO:0006810; GO:0006811; GO:0016020; GO:0016021; GO:0030054
HmN_000053800	Vesicle associated membrane protein	1.72484	805.557	244.783	9.99917e-44	GO:0016020; GO:0016021; GO:0016192
HmN_000008700	Zinc finger SWIM domain containing protein	1.72073	2098.94	631.617	7.63226e-43	GO:0008270
HmN_000264800	Tubulin alpha 1C chain	1.71632	12242.8	3725.8	1.38766e-120	GO:0000166; GO:0003924; GO:0005200; GO:0005525; GO:0005737; GO:0005856; GO:0005874; GO:0007017; GO:0008152
HmN_002142700	n/a	1.71591	764.237	231.673	1.59215e-12	GO:0016491; GO:0055114
HmN_000376900	Ribosomal protein L18	1.71587	3085.99	930.727	8.23308e-12	GO:0003735; GO:0005622; GO:0005840; GO:0006412
HmN_000390700	Ribosomal protein l7a	1.71573	44889.2	13653.4	3.89705e-135	GO:0005840; GO:0030529; GO:0042254
HmN_000767400	Phosphomannomutase	1.71459	1652.82	504.613	6.67309e-40	GO:0003824; GO:0004615; GO:0005737; GO:0008152; GO:0009298; GO:0016853
HmN_000214700	Cysteine string protein	1.71388	979.33	296.99	7.53436e-55	GO:0016020; GO:0016021
HmN_000708300	Mohawk	1.7114	247.327	73.6333	5.70544e-07	GO:0003677; GO:0005634; GO:0006355; GO:0043565
HmN_002011700	n/a	1.7079	256.213	78.3933	3.37044e-13	GO:0005515
HmN_000808300	Iron sulfur cluster assembly 2	1.70009	183.45	56.3167	9.00601e-12	GO:0005198; GO:0016226; GO:0051536; GO:0097428
HmN_002282800	n/a	1.69883	1059.97	323.553	2.12981e-26	GO:0005515; GO:0007165
HmN_000530700	Poly(U) specific endoribonuclease	1.69852	4832.44	1485.33	6.76374e-37	GO:0008152; GO:0016788; GO:0004521
HmN_002025600	n/a	1.69662	1280.12	392.763	1.96315e-26	GO:0006367; GO:0005672
HmN_000771300	Rhomboid-like protein	1.69641	342.45	105.903	1.96473e-14	GO:0004252; GO:0006508; GO:0008233; GO:0016020; GO:0016021; GO:0016787
HmN_000855200	Aryl hydrocarbon receptor	1.69479	818.727	252.777	2.05538e-37	GO:0003677; GO:0005634; GO:0006351; GO:0006355; GO:0046983; GO:0005515
HmN_000524200	Mucolipin 3	1.69349	1569.83	483.117	3.28406e-38	GO:0016020; GO:0016021
HmN_002185100	n/a	1.69233	150.973	45.8	2.30731e-06	n/a
HmN_000530400	Protein-tyrosine-phosphatase	1.69012	1529.18	471.023	1.00893e-67	GO:0004721; GO:0004725; GO:0006470; GO:0016020; GO:0016021; GO:0016311; GO:0016787; GO:0016791; GO:0035335; GO:0005515
HmN_000194200	Myosin 2 essential light chain	1.68894	5182.32	1598.69	8.23855e-23	GO:0005509
HmN_000236300	Expressed protein	1.68811	5595.09	1737.17	2.44212e-132	n/a
HmN_000640500	Expressed conserved protein	1.6874	1515.13	468.82	1.3077e-54	n/a
HmN_000626500	Lipoma HMGIC fusion partner	1.68472	358.923	109.673	1.85231e-16	GO:0016020; GO:0016021
HmN_000233400	Ribosomal protein L10	1.6846	38923.1	12091	4.11902e-60	GO:0003735; GO:0005622; GO:0005840; GO:0006412
HmN_000099500	n/a	1.68356	1217.65	376.163	8.60923e-52	n/a
HmN_002180500	n/a	1.68349	15625.1	4863.78	1.84764e-110	GO:0003924; GO:0007017; GO:0005874; GO:0005200; GO:0005525
HmN_000450600	n/a	1.68139	240.823	71.8867	3.68994e-06	GO:0000166; GO:0005525; GO:0005622; GO:0007165; GO:0007264; GO:0015031; GO:0016020; GO:0003924
HmN_000316700	SAP domain containing ribonucleoprotein	1.68011	2240.16	694.167	2.95009e-37	GO:0019013; GO:0030529
HmN_000077700	40S ribosomal protein S3a	1.67802	47385.5	14796.1	7.91538e-105	GO:0003735; GO:0005622; GO:0005737; GO:0005840; GO:0006412; GO:0022627; GO:0030529
HmN_000381200	Leukocyte receptor cluster	1.6778	1514.03	471.03	1.16736e-53	n/a
HmN_002199100	n/a	1.6765	741.547	229.537	8.30093e-24	n/a
HmN_000745500	Amine G protein-coupled receptor	1.67633	284.337	88.0633	5.12313e-17	GO:0004930; GO:0007186; GO:0016020; GO:0016021
HmN_000193600	Methylenetetrahydrofolate dehydrogenase	1.67589	493.353	154.933	1.0977e-23	GO:0003824; GO:0004488; GO:0009396; GO:0055114
HmN_000088900	Rna binding motif protein 4lark	1.67144	5733.07	1801.17	8.53469e-113	GO:0000166; GO:0003676
HmN_000391100	Cadherin	1.66823	1233.9	385.127	1.73984e-27	GO:0005509; GO:0005886; GO:0007155; GO:0007156; GO:0016020; GO:0016021
HmN_002066400	n/a	1.66789	613.923	191.21	4.8639e-13	n/a
HmN_000276100	Peptide G protein-coupled receptor	1.66631	285.847	90.6433	5.34036e-11	GO:0004930; GO:0007186; GO:0016020; GO:0016021; GO:0008528
HmN_000874100	Round spermatid basic protein 1	1.66522	137.94	41.84	4.47421e-08	GO:0005634
HmN_000562700	Universal stress protein	1.66487	5868.77	1840.89	4.86734e-25	GO:0006950
HmN_002241100	n/a	1.66389	2193.96	689.153	1.02094e-46	GO:0003677; GO:0005524; GO:0008094; GO:0006281
HmN_000834650	Cytochrome B561	1.66322	2893.72	911.973	7.33368e-73	GO:0000293; GO:0016020; GO:0016021; GO:0022865; GO:0022900; GO:0055085; GO:0055114
HmN_000889100	Dystrobrevin	1.66086	690.277	217.953	2.18469e-21	GO:0008270
HmN_000691100	n/a	1.65961	367.06	115.59	2.42215e-21	n/a
HmN_000353000	n/a	1.65839	8072.47	2554.48	3.32968e-45	n/a
HmN_000160200	Transmembrane protein 144	1.65688	1515.47	479.33	1.10622e-45	GO:0016020; GO:0016021; GO:0015144; GO:0034219
HmN_002190600	n/a	1.65543	1431.08	455.857	7.23802e-42	n/a
HmN_000041700	n/a	1.65295	5924.5	1884.26	9.10935e-123	GO:0017147; GO:0016055
HmN_002259100	n/a	1.65226	229.037	70.49	5.02258e-07	n/a
HmN_000145500	Jun protein	1.65154	3124.31	991.193	1.35271e-87	GO:0003700; GO:0006355; GO:0043565
HmN_000439300	Ribonuclease kappa	1.64206	978.443	310.67	4.29248e-23	GO:0004521; GO:0009303; GO:0016020; GO:0016021; GO:0090502; GO:0090305
HmN_000443100	Copper transport protein	1.64196	335.247	106.85	6.70445e-18	GO:0030001; GO:0046872
HmN_002002300	n/a	1.63879	401.427	129.037	1.98888e-11	GO:0016020
HmN_000814600	Peptidyl prolyl cis trans isomerase CWC27	1.63825	9799.07	3139.98	3.91065e-34	GO:0000413; GO:0003755; GO:0006457; GO:0016020; GO:0016021; GO:0016853; GO:0030001; GO:0046873; GO:0055085
HmN_000516000	40S ribosomal protein S6	1.63533	38047.3	12237.2	1.56353e-102	GO:0003735; GO:0005622; GO:0005840; GO:0006412; GO:0030529
HmN_000529600	Expressed conserved protein	1.63485	348.86	111.043	4.85581e-18	n/a
HmN_000493400	n/a	1.63065	209.157	67.3333	3.57709e-12	GO:0005272; GO:0006814; GO:0016020
HmN_002155400	n/a	1.62545	994.987	319.137	3.43765e-39	GO:0006396
HmN_000250500	Rapamycin insensitive companion of mTOR	1.62532	2327.53	752.6	2.26902e-84	GO:0031929; GO:0031932; GO:0005488
HmN_002209700	n/a	1.6253	1743.11	561.69	5.18038e-52	GO:0003723; GO:0033897
HmN_000912200	Dna repair protein rad51 1	1.62396	14862.6	4820.46	1.45297e-102	GO:0003677; GO:0005524; GO:0006259; GO:0008094
HmN_000746400	Expressed protein	1.62278	205.12	66.6933	8.84854e-09	GO:0005515
HmN_000069500	Thioredoxin domain containing protein 17	1.62163	481.107	153.953	6.61056e-08	n/a
HmN_000543900	n/a	1.62104	202.647	65.4333	9.93977e-13	n/a
HmN_000410700	Nicotinic acetylcholine receptor subunit type F	1.61986	774.903	250.017	2.40571e-39	GO:0005216; GO:0005230; GO:0005886; GO:0006810; GO:0006811; GO:0016020; GO:0016021; GO:0030054; GO:0034220; GO:0045202; GO:0045211; GO:0098655; GO:0004888; GO:0022848
HmN_000676800	Vang-like protein 1	1.61945	1809.49	585.583	6.79148e-48	GO:0007275; GO:0016020; GO:0016021
HmN_000005800	Wd40 repeat	1.61675	762.43	246.21	4.84446e-29	GO:0005515
HmN_002027100	n/a	1.61616	170.853	54.9333	7.81335e-08	n/a
HmN_000119400	Gata zinc finger domain containing 2b	1.61615	6947.42	2265.69	1.00442e-135	GO:0003676; GO:0006355; GO:0008270
HmN_000062400	Kinase D interacting substrate of 220 kDa	1.61053	533.48	172.077	2.27745e-22	GO:0016020; GO:0016021; GO:0016301; GO:0016310
HmN_001025600	Calcium binding EF hand,domain containing protein	1.60986	135.083	44.7767	3.71918e-08	GO:0005509; GO:0005875; GO:0007017
HmN_000434700	Bestrophin 3	1.60714	335.437	108.98	2.31081e-07	n/a
HmN_000314200	Gag pol polyprotein	1.60449	3951.41	1298.94	3.75466e-116	GO:0003824; GO:0009058; GO:0030170
HmN_000654400	n/a	1.59832	1585.83	524.05	1.88954e-67	GO:0016491; GO:0055114; GO:0004729; GO:0006779
HmN_000375900	Ribosomal protein L15	1.59577	36696.8	12134.7	1.16301e-133	GO:0003735; GO:0005622; GO:0005840; GO:0006412; GO:0030529
HmN_002162000	n/a	1.5926	131.04	41.8067	1.10136e-07	GO:0005515; GO:0004866
HmN_000659500	Calcium:calmodulin dependent 3',5' cyclic	1.58931	159.187	53.2467	8.03591e-08	GO:0004114; GO:0007165; GO:0008081; GO:0008152; GO:0016787; GO:0046872
HmN_002132000	n/a	1.58807	3283.03	1085.19	4.28864e-14	n/a
HmN_000202700	EGF region	1.5859	250.12	81.9667	1.16631e-14	GO:0016020; GO:0016021
HmN_000106200	rRNA 2' O methyltransferase fibrillarin	1.5846	3334.72	1112.03	4.1316e-70	GO:0003723; GO:0006364; GO:0008033; GO:0008168; GO:0016740; GO:0032259
HmN_000478800	Ran guanine nucleotide release factor	1.58332	221.987	73.48	1.74984e-07	n/a
HmN_000302300	Protocadherin alpha 6	1.57685	350.19	117.763	2.77684e-12	GO:0005509; GO:0005886; GO:0007155; GO:0007156; GO:0016020; GO:0016021
HmN_000385300	Calmodulin	1.57679	145.39	48.7567	3.7474e-08	GO:0005509
HmN_002075900	n/a	1.5765	150.063	48.7967	4.75836e-09	n/a
HmN_002068700	n/a	1.57642	1108.79	368.377	2.79821e-37	n/a
HmN_000055700	Delta-like protein	1.57615	500.147	167.95	8.04862e-10	GO:0005509; GO:0007154; GO:0007275; GO:0016020; GO:0016021
HmN_000668800	Rassf1	1.57598	780.57	258.557	1.78659e-23	GO:0007165
HmN_002133200	n/a	1.57474	440.517	147.573	2.06701e-24	n/a
HmN_000373600	Tetratricopeptide helical	1.5707	782.573	264.18	5.15906e-27	GO:0005515
HmN_000835000	Trafficking protein particle complex 2	1.56538	888.583	299.33	4.45027e-25	GO:0005622; GO:0005737; GO:0006810; GO:0006888
HmN_000319700	Frizzled	1.56429	2942.32	993.943	9.07464e-37	GO:0004888; GO:0007166; GO:0007275; GO:0016020; GO:0016021; GO:0016055; GO:0042813; GO:0005515
HmN_000678900	n/a	1.5625	1673.87	568.037	4.32844e-51	n/a
HmN_000632800	116 kDa U5 small nuclear ribonucleoprotein	1.56214	1066.7	361.677	2.06736e-34	GO:0000166; GO:0003924; GO:0005525; GO:0008152; GO:0019013; GO:0030529
HmN_002275500	n/a	1.5613	1484.41	501.797	8.04112e-41	n/a
HmN_000053600	n/a	1.56065	897.377	302.08	9.77055e-39	n/a
HmN_000452200	60S ribosomal protein L8	1.56008	37152.3	12588.3	1.56038e-133	GO:0003723; GO:0003735; GO:0005622; GO:0005840; GO:0006412; GO:0015934
HmN_002026200	n/a	1.5589	1525.08	514.973	2.19517e-29	n/a
HmN_000840300	La protein 7	1.55375	6462.77	2199.25	5.79653e-74	GO:0000166; GO:0003676
HmN_000424300	X ray repair cross complementing protein 6	1.55148	1468.95	497.327	7.30018e-48	GO:0000723; GO:0003677; GO:0003684; GO:0004003; GO:0005634; GO:0006303; GO:0032508; GO:0042162; GO:0043564
HmN_000116500	COX assembly mitochondrial protein	1.5495	340.457	116.167	9.63626e-11	n/a
HmN_000241900	n/a	1.54859	616.967	210.103	2.25382e-16	GO:0008374; GO:0006629
HmN_000152600	Arginyl tRNA synthetase	1.54393	1476.06	506.313	7.84652e-53	GO:0004812; GO:0008152
HmN_000080100	EVH1	1.54293	1356.67	464.83	2.01593e-42	n/a
HmN_000078000	Protein N terminal glutamine	1.54219	777.55	268.393	6.17595e-27	GO:0008152; GO:0016811
HmN_000706500	Expressed conserved protein	1.54202	638.313	217.277	7.60355e-13	n/a
HmN_000160000	n/a	1.54159	1965.52	674.053	1.51443e-23	GO:0015144; GO:0034219; GO:0016021
HmN_000321400	Dynein light chain	1.53937	2517.13	858.5	6.477e-12	GO:0005875; GO:0007017; GO:0030286
HmN_000133300	PDZ domain containing protein GIPC3	1.53806	5469.2	1876.49	3.12575e-73	GO:0009055; GO:0016020; GO:0016021; GO:0020037
HmN_000096900	n/a	1.53757	247.487	84.2267	8.49534e-12	GO:0016020; GO:0016021
HmN_000873700	Rho GTPase activating protein 19	1.53724	944.603	323.993	2.64829e-25	GO:0007165
HmN_000386900	ATPase, H+ transporting, lysosomal 13 kDa, V1	1.53577	1071.72	368.063	6.35995e-42	GO:0042626; GO:0015992; GO:0016471
HmN_000751100	Pikachurin	1.53543	192.207	64.77	9.94595e-08	n/a
HmN_002208100	n/a	1.53443	243.967	82.46	4.22549e-12	GO:0003924; GO:0005525
HmN_000362500	Zinc finger protein	1.53186	740.12	254.647	1.84983e-28	n/a
HmN_002234500	n/a	1.53168	4026.72	1390.14	5.38089e-28	GO:0004298; GO:0051603; GO:0005839; GO:0019773
HmN_000064200	Expressed conserved protein	1.53118	1279.81	441.867	2.93111e-51	n/a
HmN_000158000	Mitochondrial folate transporter:carrier	1.52463	1001.74	347.093	9.19365e-25	GO:0006810; GO:0016020; GO:0016021; GO:0055085
HmN_000900200	Expressed protein	1.52461	720.787	252.147	2.15242e-24	GO:0004129; GO:0005739; GO:1902600
HmN_002028600	n/a	1.5224	2821.53	982.217	2.63538e-41	GO:0001104; GO:0006357; GO:0016592
HmN_000830000	NRPS enzyme	1.52196	264.427	91.05	3.15945e-12	GO:0008152; GO:0016491; GO:0055114
HmN_000729200	AP 2 complex subunit mu 1	1.51562	4459.14	1556.02	9.08196e-83	GO:0006810; GO:0006886; GO:0015031; GO:0016020; GO:0016192; GO:0030131
HmN_002141400	n/a	1.50295	300.89	104.253	1.68692e-13	GO:0004930; GO:0007186; GO:0016021
HmN_000316000	n/a	1.50076	794.02	281.5	5.37501e-27	n/a
HmN_002093600	n/a	1.50028	678.187	237.36	4.38482e-11	GO:0016020
HmN_001018600	Nuclear nucleic acid binding protein C1D	1.49973	788.677	279.117	6.19147e-17	n/a
HmN_002199500	n/a	1.49949	150.807	53.4267	2.63313e-09	n/a
HmN_002273700	n/a	1.49812	1123.95	399.14	4.6199e-19	n/a
HmN_000431000	GTPase activating Rap:RanGAP domain 3	1.49812	1009.66	354.197	9.10163e-17	GO:0005096; GO:0043547; GO:0051056
HmN_000274000	Nucleolin	1.49698	590.383	207.923	1.62896e-27	GO:0000166; GO:0003676
HmN_000159100	RNA recognition motif, RNP 1	1.49613	5061.38	1791.34	2.61765e-67	GO:0000166; GO:0003676; GO:0030619
HmN_000087900	Protein tssc1	1.4949	851.627	301.873	3.72505e-31	GO:0005515
HmN_000931400	Expressed protein	1.4908	369.34	128.853	5.08731e-14	n/a
HmN_000862100	Expressed protein	1.49065	339.79	119.813	1.65947e-17	n/a
HmN_000399500	n/a	1.48932	2423.34	858.133	3.78919e-41	GO:0005509; GO:0007156; GO:0016020; GO:0007155; GO:0005886
HmN_000704100	Mediator of RNA polymerase II transcription	1.48697	689.487	245.923	5.11055e-31	GO:0001104; GO:0006357; GO:0016592
HmN_000633700	Zinc finger, C2H2 type	1.48473	2805.09	1002.42	1.81329e-89	GO:0046872; GO:0003676
HmN_000675900	Pre-B-cell leukemia	1.48349	2935.97	1050.36	4.52805e-80	GO:0003677; GO:0003700; GO:0005634; GO:0006355; GO:0043565
HmN_000161700	Beta catenin	1.4832	8359.75	2988.26	1.62044e-117	GO:0004871; GO:0007165; GO:0034333; GO:0005515; GO:0005488
HmN_002184700	n/a	1.48054	692.573	248.39	3.51771e-19	n/a
HmN_002160400	n/a	1.47832	192.897	69.1167	6.01245e-10	n/a
HmN_000222800	n/a	1.47577	578.27	207.157	6.08419e-20	GO:0004725; GO:0006470; GO:0016791; GO:0016311
HmN_000765400	Type 11 methyltransferase	1.47562	360.667	129.223	2.74395e-17	GO:0008152; GO:0008168; GO:0016740; GO:0032259
HmN_002284400	n/a	1.47495	453.693	163.567	1.32359e-17	GO:0003723; GO:0032259; GO:0005845
HmN_002162800	n/a	1.4745	402.59	144.753	2.03283e-21	n/a
HmN_000324900	n/a	1.4723	225.723	80.03	3.3867e-08	GO:0016020; GO:0016021
HmN_000531300	IQ domain containing protein K	1.47005	110.14	39.64	2.38895e-06	GO:0005515
HmN_000462700	Expressed protein	1.46777	6763.83	2445.14	6.1459e-94	GO:0008270; GO:0016491; GO:0055114
HmN_000052500	n/a	1.46672	13002.8	4674.27	8.65007e-12	GO:0030042; GO:0015629; GO:0003779; GO:0005622
HmN_000676900	Protein memo1	1.46554	3170.18	1148.33	7.77497e-65	n/a
HmN_000853700	Expressed protein	1.46509	647.22	231.197	5.20583e-07	GO:0016020; GO:0016021
HmN_000819400	Expressed protein	1.46393	309.883	110.74	6.65129e-15	n/a
HmN_000262700	Splicing factor 3a subunit 2	1.46384	1688.28	608.753	1.34293e-53	GO:0003676; GO:0005634; GO:0008270; GO:0046872
HmN_000555700	Anosmin 1	1.46224	1738.67	630.427	8.82694e-55	GO:0005515
HmN_000270600	Tyrosine protein kinase pr2	1.46189	4152.91	1502.87	8.00079e-78	GO:0000166; GO:0004672; GO:0004713; GO:0005524; GO:0006468; GO:0016301; GO:0016310; GO:0016740; GO:0018108; GO:0005515
HmN_000253300	n/a	1.45896	553.75	201.22	6.22661e-14	n/a
HmN_000861000	n/a	1.45784	455.55	165.37	1.86879e-20	n/a
HmN_000031900	Vacuolar protein sorting-associated protein 29	1.45748	2427.04	881.243	2.30282e-37	GO:0006810; GO:0015031; GO:0042147; GO:0030904
HmN_000787000	Palmitoyltransferase	1.45735	929.503	339.233	6.51417e-41	GO:0008152; GO:0008270; GO:0016020; GO:0016021; GO:0016740; GO:0016746; GO:0019706; GO:0046872
HmN_000774600	Universal stress protein	1.45588	1199.29	433.67	8.30897e-16	GO:0006950
HmN_000031600	PUR alpha protein	1.45434	9785.06	3568.88	5.38752e-102	n/a
HmN_000337400	Lipoma hmgic fusion partner protein	1.45345	288.44	103.3	1.28958e-11	GO:0016020; GO:0016021
HmN_000478500	L-lactate dehydrogenase	1.45271	11155.3	4052.95	1.9726e-13	GO:0003824; GO:0004459; GO:0005737; GO:0005975; GO:0016491; GO:0016616; GO:0019752; GO:0055114
HmN_001026500	60S ribosomal protein L18	1.45131	3620.73	1326.46	1.34159e-55	GO:0003735; GO:0005622; GO:0005840; GO:0006412
HmN_002125300	n/a	1.44712	298.57	107.08	1.07081e-07	n/a
HmN_000534900	Fatty acid binding protein, adipocyte	1.44564	531.983	195.783	3.00934e-12	GO:0005215; GO:0006810; GO:0008289
HmN_000164700	Protocadherin 11	1.44485	118.87	43.17	4.76158e-07	GO:0005509; GO:0005886; GO:0007155; GO:0007156; GO:0016020; GO:0016021
HmN_000080600	n/a	1.44484	694.03	255.047	5.53695e-32	GO:0016020; GO:0016021
HmN_000923600	Expressed conserved protein	1.44399	289.33	107.077	2.39315e-10	n/a
HmN_002014200	n/a	1.44319	93.2733	34.3267	5.35027e-06	GO:0005515
HmN_000032200	Deoxyhypusine synthase	1.44307	2148.17	786.61	7.95383e-32	GO:0008612
HmN_000673100	Cell adhesion molecule:down regulated by	1.44228	1111.22	409.743	3.563e-39	GO:0016020; GO:0016021; GO:0005515
HmN_000542600	WD repeat containing protein 74	1.44167	818.41	300.273	3.48248e-36	GO:0005515; GO:0042273; GO:0005730
HmN_000879300	Pre mRNA splicing regulator female lethal(2)D	1.4405	1898.61	700.053	6.3971e-60	GO:0005634; GO:0048024; GO:0080009; GO:0000381
HmN_000540200	LRP2 binding protein	1.44042	363.297	131.907	6.27599e-14	GO:0005515
HmN_000490400	Ribosomal protein l4	1.44023	39914.4	14704.1	5.45141e-128	GO:0003735; GO:0005840; GO:0006412
HmN_002196600	n/a	1.43804	200.67	72.1733	2.53567e-09	GO:0003777; GO:0007018; GO:0030286
HmN_000899000	Deoxyribonuclease	1.43759	46017	16973.9	8.86847e-72	GO:0005622; GO:0005840; GO:0030529; GO:0042254
HmN_000819600	Pre mRNA splicing factor 38A	1.43592	978.62	360.747	1.09981e-39	n/a
HmN_000596400	Expressed protein	1.43508	415.157	154.66	3.01141e-15	n/a
HmN_000643900	CUG BP and ETR3 factor	1.4348	2150.11	791.92	6.70693e-32	GO:0000166; GO:0003676
HmN_000408600	Expressed conserved protein	1.4339	1665.48	616.987	1.57617e-48	n/a
HmN_000239600	V-type proton ATPase subunit a	1.43232	1240.27	457.477	6.92664e-42	GO:0000220; GO:0006810; GO:0006811; GO:0015078; GO:0015991; GO:0015992; GO:0016020; GO:0016021; GO:0033179
HmN_000089700	CAAX prenyl protease 2	1.43212	723.4	268.567	1.40729e-29	GO:0006508; GO:0008233; GO:0016020; GO:0016021
HmN_000693400	Syntaxin 1a	1.43152	895.55	329.22	1.14314e-30	GO:0000149; GO:0005484; GO:0005622; GO:0006886; GO:0016020; GO:0016021; GO:0016192; GO:0017157; GO:0061025
HmN_001013300	Expressed protein	1.43048	2394.08	888.497	1.1268e-54	n/a
HmN_000098800	Clathrin coat assembly protein ap17	1.43002	2062.01	766.047	2.6111e-31	GO:0006810; GO:0006886; GO:0008565; GO:0015031; GO:0016020; GO:0016192; GO:0030117; GO:0030122
HmN_002175000	n/a	1.42887	278.82	103.6	1.13239e-10	n/a
HmN_000753000	1 pyrroline 5 carboxylate dehydrogenase	1.42798	2625.72	966.233	2.40378e-08	GO:0003842; GO:0006537; GO:0006561; GO:0008152; GO:0016491; GO:0016620; GO:0055114; GO:0010133
HmN_000221400	Orphan Rhodopsin-like G protein-coupled receptor	1.42396	190.5	71.6367	7.01829e-09	GO:0004930; GO:0007186; GO:0016020; GO:0016021
HmN_000665900	Eukaryotic translation initiation factor 3 subunit K	1.42329	3935.98	1468.37	4.46341e-89	GO:0001731; GO:0003723; GO:0003743; GO:0005737; GO:0005852; GO:0006412; GO:0006413; GO:0006446; GO:0016282; GO:0033290; GO:0043022; GO:0005488
HmN_000739400	Nk4	1.42315	141.157	52.6767	3.04089e-07	GO:0003677; GO:0005634
HmN_000722400	Para nitrobenzyl esterase	1.42185	159.083	58.7167	8.44562e-09	GO:0016020; GO:0016021
HmN_000368700	Golgi associated plant pathogenesis	1.42034	612.573	227.657	1.82668e-07	GO:0005576
HmN_000813000	High mobility group protein dsp1	1.4197	1743.03	653.647	1.99888e-43	n/a
HmN_000551700	Contactin	1.41695	185.757	69.0367	1.05643e-08	GO:0005515
HmN_000582800	Intraflagellar transport protein 20	1.41674	132.707	49.5733	1.08104e-07	GO:0031514
HmN_002140200	n/a	1.41415	1984.97	745.88	8.9392e-27	n/a
HmN_000709200	n/a	1.41286	2784.6	1046.85	8.25451e-46	n/a
HmN_000794200	n/a	1.41258	1633.02	612.147	1.12941e-49	n/a
HmN_000311200	60s ribosomal protein l6	1.4121	31280.8	11748.4	3.80612e-74	GO:0003735; GO:0005622; GO:0005840; GO:0006412
HmN_000466000	n/a	1.41178	4656.17	1745.17	1.46377e-76	n/a
HmN_002198300	n/a	1.41154	1938.47	724.183	2.98665e-36	GO:0004672; GO:0006468; GO:0005524; GO:0004713
HmN_000792200	Metallo beta lactamase domain containing protein	1.41125	413.767	156.627	2.5093e-16	n/a
HmN_000462000	Adenomatous polyposis coli protein 2	1.40945	4218.62	1581.41	2.61146e-44	GO:0008013; GO:0016055; GO:0030178; GO:0005515; GO:0005488
HmN_000073800	Protein FAM154A	1.40935	294.733	108.94	1.67633e-10	GO:0008017
HmN_000240400	Dynein light chain	1.40877	232.153	86.1033	8.30644e-07	GO:0005875; GO:0007017; GO:0030286
HmN_000372300	Major egg antigen (P40)	1.4071	36650.7	13765.2	2.56657e-17	n/a
HmN_000056800	Zinc finger protein 706, gene 2	1.40676	1261.58	471.693	3.0767e-16	n/a
HmN_000393300	Neuronal acetylcholine receptor subunit alpha 4	1.40628	829.823	312.377	3.15882e-14	GO:0005216; GO:0005230; GO:0005886; GO:0006810; GO:0006811; GO:0016020; GO:0016021; GO:0030054; GO:0034220; GO:0045202; GO:0045211; GO:0098655; GO:0004888; GO:0022848
HmN_000115900	Expressed conserved protein	1.40613	5649.25	2123.1	6.45083e-14	n/a
HmN_000369300	BAG family molecular chaperone regulator 1	1.40308	971.89	367.56	1.51637e-15	GO:0051087; GO:0005515
HmN_002028700	n/a	1.40127	2272.25	858.903	2.5753e-71	GO:0005515
HmN_000042200	SH2 domain containing adapter protein F	1.40032	1785.92	673.517	6.87906e-34	n/a
HmN_000078900	Expressed protein	1.39649	1777.13	671.19	5.92322e-29	GO:0005739; GO:0018293
HmN_000118300	Colorectal mutant cancer protein	1.39641	1335.56	507.2	7.10649e-52	n/a
HmN_000863900	Expressed protein	1.396	172.383	66.18	5.76755e-07	n/a
HmN_000158100	n/a	1.39585	203.89	77.1733	2.91913e-07	n/a
HmN_000536000	Expressed protein	1.39493	1617.78	613.473	3.34657e-18	n/a
HmN_000431300	Three prime repair exonuclease 1	1.39462	948.02	361.797	3.28173e-29	GO:0003676; GO:0004527; GO:0090305
HmN_000711600	Protein midA, mitochondrial	1.39344	1390.94	527.85	8.08069e-37	n/a
HmN_000494900	Transcription factor SOX 14	1.38823	482.293	185.377	2.27151e-16	n/a
HmN_002211300	n/a	1.38781	41458.5	15828.4	1.48812e-54	GO:0005515; GO:0003735; GO:0006412; GO:0005622; GO:0005840
HmN_000202500	n/a	1.386	877.357	333.423	1.88129e-20	GO:0005515
HmN_000208400	Transcription factor SOX 6	1.38568	1053.24	404.08	3.4167e-42	GO:0032040
HmN_000064300	5-aminolevulinate synthase	1.37931	1039.47	397.723	3.49149e-37	GO:0003824; GO:0003870; GO:0005739; GO:0005759; GO:0006782; GO:0006783; GO:0008152; GO:0009058; GO:0016740; GO:0016746; GO:0030170; GO:0033014
HmN_000569800	U1 small nuclear ribonucleoprotein a	1.3773	2763.1	1064.16	3.11105e-63	GO:0000166; GO:0000398; GO:0003676; GO:0017069; GO:0019013; GO:0030529
HmN_000626100	Alkylated dna repair protein alkb 8	1.37691	1545.29	595.147	2.7628e-48	GO:0008152; GO:0008168; GO:0032259; GO:0016300; GO:0002098; GO:0030488
HmN_000612100	Small glutamine rich tetratricopeptide	1.37671	6373.39	2454.12	1.45467e-99	GO:0005515
HmN_000650800	Unc 13 (Munc13)	1.37403	1267.35	490.143	1.45128e-21	GO:0005622; GO:0007268; GO:0019992; GO:0035556; GO:0046872; GO:0005509; GO:0005543
HmN_000439700	Expressed conserved protein	1.37371	1807.32	697.733	1.04688e-38	GO:0006810; GO:0016021
HmN_002271400	n/a	1.37313	130.12	50.4267	1.05578e-06	GO:0015293; GO:0016021
HmN_000269000	C2 calcium dependent membrane targeting	1.37059	182.087	70.4533	1.46583e-08	GO:0005622; GO:0007268; GO:0019992; GO:0035556; GO:0046872; GO:0005509; GO:0005543
HmN_000518600	tRNA dihydrouridine synthase 2	1.3703	1914.33	739.337	1.32888e-50	GO:0002943; GO:0003824; GO:0008033; GO:0017150; GO:0050660; GO:0055114
HmN_000387900	Voltage dependent L type calcium channel subunit	1.37025	504.57	193.717	5.18522e-12	GO:0005216; GO:0005244; GO:0005245; GO:0005262; GO:0005891; GO:0006810; GO:0006811; GO:0006816; GO:0016020; GO:0016021; GO:0034765; GO:0055085; GO:0070588
HmN_000520400	Cyclin dependent kinase 5	1.36996	697.55	270.237	1.2669e-15	GO:0000166; GO:0004672; GO:0005524; GO:0006468; GO:0016301; GO:0016310
HmN_000755300	Sec13 protein	1.36926	4123.5	1590.57	4.5009e-50	GO:0005515; GO:0005198; GO:0016192; GO:0090114; GO:1904263; GO:0030127
HmN_002221500	n/a	1.36658	5481.34	2128.06	4.89635e-53	GO:0000049; GO:0004812; GO:0005524; GO:0043039; GO:0005737; GO:0000166; GO:0004826; GO:0006432
HmN_000311100	Arginine:serine rich splicing factor	1.36513	11650.9	4516.84	8.2191e-95	GO:0000166; GO:0003676
HmN_000277300	Zinc finger CCHC type and RNA binding	1.36244	366.817	143.407	9.88312e-11	GO:0000166; GO:0003676; GO:0008270; GO:0046872
HmN_000634100	Serine:threonine protein kinase 3	1.35982	5506.86	2144.06	2.16048e-93	GO:0000166; GO:0004672; GO:0004674; GO:0005524; GO:0006468; GO:0007165; GO:0016301; GO:0016310
HmN_000438400	Arachidonate 12-lipoxygenase	1.35721	1157.71	448.973	5.24925e-37	GO:0016165; GO:0016491; GO:0016702; GO:0046872; GO:0051213; GO:0055114; GO:0005515
HmN_000834900	Sel1 repeat containing protein 1B	1.35642	1170.2	456.74	1.33183e-21	n/a
HmN_000108400	Zinc finger protein	1.35608	1719.63	670.293	7.42521e-39	GO:0003676; GO:0046872
HmN_000104800	Centromere protein j	1.3559	576.693	226.107	1.86355e-16	n/a
HmN_000269600	n/a	1.35188	2309.59	904.3	2.24801e-40	GO:0046873; GO:0030001; GO:0055085; GO:0016020
HmN_002223800	n/a	1.35087	1112.86	438.333	4.45013e-35	GO:0006338; GO:0000228
HmN_000596100	Translocon associated protein subunit delta	1.35079	3121.25	1222.9	2.06696e-25	GO:0005783; GO:0016020; GO:0016021
HmN_000611400	NADH ubiquinone oxidoreductase sgdh subunit	1.35037	2305.57	905.14	1.18221e-53	n/a
HmN_000353200	Delta-aminolevulinic acid dehydratase	1.34666	1084.8	427.78	2.64968e-31	GO:0003824; GO:0004655; GO:0006779; GO:0016829; GO:0033014; GO:0046872
HmN_000572400	Axis inhibition protein axin	1.34654	1615.43	633.227	6.34425e-48	n/a
HmN_000407000	Proteasome, alpha subunit	1.34517	4567.93	1798.77	4.19027e-49	GO:0000502; GO:0004175; GO:0004298; GO:0005634; GO:0005839; GO:0051603; GO:0019773
HmN_000236400	Synaptotagmin	1.34222	1198.88	471.643	2.85961e-36	GO:0016020; GO:0016021; GO:0005544; GO:0007269; GO:0008021
HmN_000858700	GA binding protein alpha chain	1.34175	1635.38	645.593	1.15714e-50	GO:0003677; GO:0003700; GO:0005634; GO:0006355; GO:0043565
HmN_000587100	Cysteine desulfurase, mitochondrial	1.34157	2751.88	1087.23	7.74485e-46	GO:0003824; GO:0030170; GO:0031071; GO:0044571
HmN_000789600	Myeloid ecotropic viral integration site	1.34086	647.613	253.227	8.9087e-18	GO:0003677; GO:0005634; GO:0006355
HmN_000610800	Deoxynucleotidyltransferase terminal interacting	1.33957	964.947	381.03	2.35213e-25	GO:0008152; GO:0016740
HmN_002101200	n/a	1.33903	2249.55	889.13	1.17378e-36	GO:0043044; GO:0071564
HmN_000817200	Polycomb group ring finger protein 3	1.33824	37460.6	14780.5	2.99696e-22	GO:0003735; GO:0005622; GO:0005840; GO:0006412
HmN_000220800	Peptidyl tRNA hydrolase 2, mitochondrial	1.33802	1492.74	586.403	2.09945e-08	GO:0004045; GO:0008152; GO:0016020; GO:0016021; GO:0016787
HmN_000021500	FERM and pleckstrin domain containing protein	1.3373	893.717	351.797	7.18035e-14	GO:0005089; GO:0005856; GO:0035023; GO:0043547
HmN_000315300	Heterogeneous nuclear ribonucleoprotein k	1.33722	7794.39	3083.15	2.87512e-86	GO:0003676; GO:0003723; GO:0019013; GO:0030529
HmN_000321200	Dynein light chain	1.33577	911.18	359.257	8.48856e-20	GO:0005875; GO:0007017; GO:0030286
HmN_000807900	EF hand domain containing family member A2	1.33529	3962.08	1572.71	4.09357e-65	GO:0005509
HmN_000529900	Myeloid zinc finger 1	1.33345	1642.16	651.97	2.03977e-30	GO:0003676; GO:0046872
HmN_000025600	2 amino 3 ketobutyrate coenzyme A ligase	1.33184	2104.47	831.667	1.29062e-35	GO:0003824; GO:0006567; GO:0008152; GO:0008890; GO:0009058; GO:0016740; GO:0016874; GO:0030170
HmN_000414300	Elongation factor 1 delta	1.33163	15562.5	6180.09	1.64775e-72	GO:0003746; GO:0005853; GO:0006414
HmN_000089900	Transcription factor E2F4	1.32966	1084.41	431.697	4.76508e-20	GO:0003677; GO:0003700; GO:0005634; GO:0005667; GO:0006351; GO:0006355; GO:0046983
HmN_000433400	Strabismus	1.3295	1032.6	409.563	3.73614e-29	GO:0007275; GO:0016020; GO:0016021
HmN_000225100	Dynein light chain	1.32736	1751.1	694.563	7.24944e-13	n/a
HmN_000174600	Serine:threonine protein kinase SIK3	1.32719	1206.43	479.66	9.96849e-40	GO:0000166; GO:0004672; GO:0005524; GO:0006468; GO:0016301; GO:0016310
HmN_000121100	Lamin	1.31598	584.763	234.353	3.4487e-24	n/a
HmN_000806500	n/a	1.31578	679.347	272.537	8.57381e-25	n/a
HmN_000280900	Ribosome biogenesis regulatory protein	1.31414	669.123	269.76	4.01843e-17	GO:0005634; GO:0042254
HmN_000209900	14-3-3 protein epsilon	1.31283	14329.6	5768.69	3.41718e-79	GO:0019904
HmN_000206500	O phosphoseryl tRNA(Sec) selenium	1.30932	1464.37	586.567	9.64657e-25	GO:0003824; GO:0016740; GO:0016785; GO:0097056
HmN_000444900	Cd109 antigen	1.3077	533.017	216.687	2.32368e-14	GO:0005576; GO:0005615
HmN_000807800	Mitochondrial ribosomal protein l24	1.30745	1200.86	485.983	1.33579e-19	GO:0003735; GO:0005622; GO:0005840; GO:0006412
HmN_000795900	Expressed protein	1.30603	10653.6	4301.33	1.48894e-63	n/a
HmN_000518500	Phosphatidylinositol binding clathrin assembly	1.30414	1159.42	468.347	1.81399e-34	GO:0005543; GO:0005545; GO:0030136; GO:0030276; GO:0048268
HmN_000955300	Zinc finger protein	1.30404	264.427	108.05	7.88043e-09	GO:0003676; GO:0046872
HmN_000536700	Expressed conserved protein	1.30361	442.303	178.137	4.21957e-15	n/a
HmN_000727200	Ribosomal protein l5	1.30356	38183.4	15459.2	1.61684e-111	GO:0003735; GO:0005622; GO:0005840; GO:0006412; GO:0008097
HmN_000067100	Protocadherin 1	1.30344	380.487	155.333	2.10478e-09	GO:0005509; GO:0005886; GO:0007155; GO:0007156; GO:0016020; GO:0016021
HmN_000265200	Phd finger protein 10	1.29973	1260.24	511.353	3.25871e-41	GO:0008270; GO:0046872
HmN_000840000	WD repeat containing protein 86	1.29765	280.443	114.063	1.0681e-10	GO:0005515
HmN_000509900	n/a	1.29596	564.093	230.65	6.03448e-20	n/a
HmN_002175900	n/a	1.2949	1112.18	450.99	9.24631e-30	n/a
HmN_000008600	Expressed protein	1.29088	280.167	114.013	3.76767e-08	GO:0046983
HmN_000305900	Splicing factor, arginine:serine rich 4	1.2908	18890.3	7708.72	9.74781e-50	GO:0000166; GO:0003676
HmN_000685900	Lysosomal Pro X carboxypeptidase	1.28784	804.08	330.447	1.16912e-21	GO:0004180; GO:0006508; GO:0008236
HmN_002122800	n/a	1.28704	167.493	69.09	1.30818e-07	n/a
HmN_000146300	Zinc finger protein 577	1.28693	990.68	405.817	3.55387e-28	GO:0003676; GO:0046872
HmN_000389700	Expressed conserved protein	1.28595	1063.41	437.473	3.27989e-20	n/a
HmN_000107300	Insulin induced gene 2 protein	1.28585	2355.08	959.92	3.37937e-16	GO:0016020; GO:0016021
HmN_000880100	Spliceosome rna helicase bat1	1.28366	16739	6867.71	2.56085e-57	GO:0003676; GO:0004386; GO:0005524; GO:0008152; GO:0016787
HmN_002194400	n/a	1.28343	402.837	164.41	6.81382e-13	GO:0005515
HmN_000598600	Ethanolamine kinase 2	1.2828	1000.16	411.797	3.44781e-19	GO:0016301; GO:0016310
HmN_000403800	Leucine carboxyl methyltransferase 1	1.28234	2898.9	1191.02	6.91696e-55	GO:0008168; GO:0016740; GO:0032259
HmN_000639500	Dna2 helicase	1.28168	400.507	165.097	2.7915e-15	GO:0004386; GO:0017108; GO:0033567; GO:0043142
HmN_000114600	Syntaxin 5	1.28119	913.513	375.853	1.48013e-25	GO:0016020; GO:0016021; GO:0016192
HmN_000192700	Junction plakoglobin	1.27959	488.283	201.743	1.66655e-14	GO:0005198; GO:0045294; GO:0045296; GO:0002159; GO:0007155; GO:0005913; GO:0016342; GO:0005488
HmN_000674200	Protein phosphatase 2C	1.2794	521.323	213.01	8.8236e-17	GO:0003824; GO:0004721; GO:0004722; GO:0006470; GO:0016787; GO:0043169; GO:0046872
HmN_000395600	Nuclear receptor 2DBD gamma	1.2769	1423.49	585.693	1.4859e-19	GO:0003677; GO:0003700; GO:0005634; GO:0006351; GO:0006355; GO:0008270; GO:0043401; GO:0043565; GO:0046872
HmN_000067300	28S ribosomal protein S16	1.27683	535.177	219.833	5.54152e-14	GO:0003735; GO:0005622; GO:0005840; GO:0006412
HmN_001013400	Expressed protein	1.27603	1323.92	547.227	1.10408e-26	n/a
HmN_000071500	Small GTP binding protein Rab4	1.27554	717.177	292.387	4.50051e-14	GO:0003677; GO:0003700; GO:0005634; GO:0006355; GO:0043565
HmN_000245500	n/a	1.27385	2039.91	843.407	1.07904e-45	n/a
HmN_000162500	Ras protein Rab 4A	1.2721	1109.01	458.883	2.64817e-17	GO:0000166; GO:0003924; GO:0005525; GO:0005622; GO:0006886; GO:0006913; GO:0007165; GO:0007264; GO:0008152; GO:0015031; GO:0016020
HmN_000532000	Muscleblind protein	1.27163	2307.86	954.76	1.99389e-18	GO:0046872
HmN_000986200	Ankyrin repeat domain containing protein 49	1.27157	3380.49	1399.39	1.72686e-59	GO:0005515
HmN_000114500	tRNA (guanine-N(7)-)-methyltransferase	1.27157	1170.68	485.493	2.81587e-22	GO:0000049; GO:0003723; GO:0005634; GO:0006400; GO:0008033; GO:0008168; GO:0008176; GO:0016020; GO:0016021; GO:0016740; GO:0030488; GO:0032259; GO:0036265
HmN_000336800	Mitochondrial 39s ribosomal protein l45	1.27031	599.95	249.45	1.14843e-23	GO:0005840
HmN_000845300	n/a	1.26924	347.9	145.323	2.08645e-10	GO:0016020; GO:0016021
HmN_002104800	n/a	1.26617	764.183	317.817	1.05669e-15	GO:0003723; GO:0008173; GO:0006396
HmN_000367400	Cytoplasmic tRNA 2-thiolation protein 2	1.26576	1200.4	499.38	2.10741e-22	GO:0000049; GO:0002098; GO:0005737; GO:0008033; GO:0016779; GO:0032447; GO:0034227
HmN_000496400	Prohibitin	1.26494	4651.8	1937.56	1.67779e-41	GO:0016020; GO:0016021
HmN_002124000	n/a	1.26475	1323.43	549.753	1.33445e-44	GO:0006368; GO:0016570; GO:0016593
HmN_000649700	Expressed protein	1.26425	1304.71	542.933	2.40805e-39	GO:0007165
HmN_000389900	Monocarboxylate transporter	1.26357	573.2	238.747	1.23737e-15	GO:0016020; GO:0016021; GO:0055085
HmN_000756100	39S ribosomal protein L32, mitochondrial	1.26336	783.227	323.957	1.1118e-25	GO:0005840
HmN_000438300	39S ribosomal protein L35 mitochondrial	1.26307	528.273	217.543	8.52315e-13	GO:0003735; GO:0005622; GO:0005840; GO:0006412
HmN_000049300	Forkhead box protein K2	1.26269	829.88	345.867	7.9778e-29	GO:0003677; GO:0003700; GO:0006355; GO:0043565; GO:0005515
HmN_000407100	Intron binding protein aquarius	1.26218	1893.84	790.493	5.55575e-54	GO:0000398; GO:0005681
HmN_000127600	Expressed protein	1.26095	1027.79	425.4	1.48375e-07	n/a
HmN_000176700	n/a	1.25988	723.883	300.517	6.94924e-23	n/a
HmN_000889900	n/a	1.25931	5744.52	2400.59	5.67386e-98	GO:0005525
HmN_000603600	Kalirin	1.25926	2251.3	934.823	8.19617e-20	GO:0005089; GO:0035023; GO:0043547; GO:0005515
HmN_000422600	Peptide methionine sulfoxide reductase	1.25821	730.383	302.277	1.20206e-12	GO:0006979; GO:0016671; GO:0030091; GO:0033743; GO:0055114
HmN_000806100	RNA binding protein EWS	1.25709	8168.57	3415.71	1.51255e-77	GO:0000166; GO:0003676; GO:0003723; GO:0006355
HmN_000997100	DEAD box ATP dependent RNA helicase	1.25455	2185.01	915.233	1.09708e-43	GO:0000166; GO:0003676; GO:0004386; GO:0005524; GO:0008152; GO:0016787
HmN_000058700	Biotin protein ligase	1.25299	1484.33	622.573	1.09849e-46	GO:0004077; GO:0006464; GO:0016874
HmN_000493900	n/a	1.25134	990.467	417.723	1.77133e-21	GO:0043248; GO:0005783
HmN_000002800	n/a	1.25087	1553.92	649.16	5.04296e-25	GO:0003735; GO:0006412; GO:0005840
HmN_002187400	n/a	1.25079	3755.84	1579.72	8.88271e-52	GO:0003676
HmN_000635700	Innexin	1.25003	583.147	242.17	3.18581e-11	GO:0005921; GO:0006810; GO:0006811; GO:0016020; GO:0016021; GO:0030054
HmN_000055100	Transcriptional repressor protein YY1	1.24972	1735.94	730.837	1.01537e-34	GO:0003676; GO:0046872
HmN_000026800	n/a	1.24844	222.03	94.26	2.31081e-07	GO:0003777; GO:0007018; GO:0030286; GO:0005524; GO:0016887
HmN_000456300	Ccr4 not transcription complex	1.24823	1259.67	526.993	6.94472e-13	GO:0046872
HmN_000519600	Ubiquitin-like protein ATG12	1.2469	306.057	126.93	1.15853e-08	GO:0000045; GO:0005737; GO:0006914
HmN_000549700	Elongation factor Ts	1.24513	2640.06	1112.07	1.49821e-39	GO:0003746; GO:0005622; GO:0006414; GO:0005515
HmN_000645700	Proteasome subunit beta type	1.24446	4438.44	1870.85	2.61713e-38	GO:0000502; GO:0004175; GO:0004298; GO:0005634; GO:0005737; GO:0005839; GO:0006508; GO:0008233; GO:0016787; GO:0051603
HmN_000187500	Abdominal B	1.24431	842.537	354.87	1.0787e-10	GO:0003677; GO:0005634; GO:0006355; GO:0043565
HmN_000317000	Fructose 1,6 bisphosphatase 1	1.24397	2650.81	1120.29	9.3945e-26	GO:0005975; GO:0016311; GO:0016787; GO:0042132; GO:0042578; GO:0016791
HmN_000036900	Heterogeneous nuclear ribonucleoprotein A1	1.24369	24485.7	10337.8	2.53414e-100	GO:0000166; GO:0003676; GO:0019013; GO:0030529
HmN_000618100	Steroid dehydrogenase	1.23752	535.41	225.947	1.77603e-20	n/a
HmN_000188600	Fanconi associated nuclease 1	1.2357	919.257	392.143	1.17824e-18	GO:0008152; GO:0016788; GO:0004518; GO:0036297
HmN_000754400	Protein-tyrosine-phosphatase	1.23523	6186.36	2629.61	2.0153e-88	GO:0004721; GO:0004725; GO:0006470; GO:0016020; GO:0016021; GO:0016311; GO:0016787; GO:0016791; GO:0035335; GO:0005515
HmN_000059600	Expressed protein	1.23287	1066.34	454.607	6.05387e-19	n/a
HmN_002011300	n/a	1.23168	1444.32	614.017	1.79082e-40	GO:0008138; GO:0006470; GO:0016311; GO:0004725; GO:0016791
HmN_002257800	n/a	1.22978	663.55	283.053	7.80911e-22	n/a
HmN_000784200	Coatomer subunit epsilon	1.22969	4160.23	1768.54	3.85863e-33	GO:0005198; GO:0005622; GO:0006890; GO:0005515
HmN_000136800	Expressed conserved protein	1.22952	2671.34	1141.58	1.1083e-38	n/a
HmN_002048400	n/a	1.22895	7306.8	3117.66	3.21057e-86	GO:0016020
HmN_000408200	Signal peptidase complex subunit 3	1.22727	1559.73	666.41	2.93073e-41	GO:0003677; GO:0006260
HmN_000568300	IQ motif and SEC7 domain containing protein 1	1.2256	2494.97	1062.27	2.61803e-28	GO:0005086; GO:0032012; GO:0043547; GO:0005515
HmN_001000000	Retrovirus Pol polyprotein from type 1	1.22534	1713.38	730.56	9.74348e-26	n/a
HmN_002043000	n/a	1.22318	617.433	265.887	1.70616e-18	n/a
HmN_000781300	3 hydroxyacyl coenzyme A dehydrogenase	1.2231	1429.03	611.867	9.94681e-35	GO:0008152; GO:0016491; GO:0055114
HmN_000780900	Cathepsin b	1.22182	6986.55	2987.86	7.72781e-33	GO:0004197; GO:0006508; GO:0008233; GO:0008234; GO:0016787; GO:0050790
HmN_000783200	Groucho protein	1.21986	3204.85	1370.33	1.19757e-27	GO:0005515
HmN_000347800	Calpain 7 protein	1.2194	632.33	271.757	9.8828e-18	n/a
HmN_000663200	n/a	1.21807	185.327	78.1633	5.64396e-06	GO:0006368; GO:0016570; GO:0016593
HmN_000763900	TNFR CD27 30 40 95 cysteine rich region	1.217	1320.02	567.003	6.53756e-36	GO:0016020; GO:0016021
HmN_000570200	n/a	1.21366	597.54	258.573	9.90221e-21	n/a
HmN_000725300	Ribonuclease P protein subunit RPR2	1.21317	397.623	170.797	1.95686e-10	n/a
HmN_000027300	Expressed protein	1.21253	834.143	358.3	6.08966e-13	GO:0016020; GO:0016021
HmN_000484700	Gamma tubulin complex component 6	1.21238	871.26	373.053	4.96768e-19	GO:0000226; GO:0000922; GO:0005815; GO:0090063; GO:0043015; GO:0007020
HmN_002072900	n/a	1.21087	730.623	314.233	6.84689e-19	GO:0004672; GO:0005524; GO:0006468
HmN_000061000	Guanine nucleotide binding protein subunit	1.2105	431.433	184.043	3.28099e-14	GO:0000166; GO:0003924; GO:0004871; GO:0005525; GO:0007165; GO:0007186; GO:0008152; GO:0019001; GO:0031683
HmN_000479300	Optic atrophy 3	1.20978	1276.46	550.53	3.30597e-14	GO:0016020; GO:0016021
HmN_000262000	Expressed conserved protein	1.20832	413.5	177.85	2.81968e-14	n/a
HmN_000825000	Proteasome subunit beta type	1.20795	4613.84	1994.79	1.83931e-53	GO:0000502; GO:0004175; GO:0004298; GO:0005634; GO:0005737; GO:0005839; GO:0006508; GO:0008233; GO:0016787; GO:0051603
HmN_002207200	n/a	1.20624	238.837	104.127	6.91053e-09	n/a
HmN_000498800	Eukaryotic initiation factor 4A III	1.204	1570.71	678.053	1.87243e-33	GO:0000166; GO:0003676; GO:0003743; GO:0004386; GO:0005524; GO:0006413; GO:0016787
HmN_000682900	Protein pangolin J	1.20218	1202.26	519.083	1.49805e-30	GO:0005634; GO:0006355; GO:0006357; GO:0016055
HmN_000774000	n/a	1.20004	404.173	172.953	4.08607e-07	GO:0016020; GO:0016021
HmN_000621700	Expressed protein	1.19845	535.317	231.39	3.33672e-13	n/a
HmN_000667700	Propionyl coenzyme A carboxylase alpha chain	1.19737	2253.61	981.9	3.51873e-43	GO:0000166; GO:0003824; GO:0004075; GO:0005524; GO:0008152; GO:0016874; GO:0046872
HmN_000146100	Protein FAM76A	1.19701	1571.22	687.38	1.50815e-34	n/a
HmN_000374400	Proteasome assembly chaperone 2	1.1963	698.653	306.573	1.2316e-20	GO:0000502
HmN_000519200	PQ loop repeat containing protein 2	1.19585	1286.49	560.517	3.10417e-38	GO:0016020; GO:0016021
HmN_000696000	Zinc finger protein	1.19455	3140.26	1368.94	1.68841e-47	GO:0000398; GO:0003676; GO:0003723; GO:0008270; GO:0045131
HmN_000434900	Mitochondrial intermediate peptidase	1.19438	9864.35	4309.7	6.37362e-53	GO:0000166; GO:0000287; GO:0003723; GO:0004826; GO:0005524; GO:0005737; GO:0006432
HmN_000638500	ABC domain containing protein kinase	1.19336	1151.28	505.013	1.26818e-13	GO:0016301; GO:0016310
HmN_000721100	Serine:threonine protein phosphatase PGAM5	1.19151	2138.2	931.797	7.70415e-33	GO:0016020; GO:0016021
HmN_000314100	Gag pol polyprotein	1.19121	1214.59	529.42	6.21377e-20	n/a
HmN_000616800	U3 small nucleolar ribonucleoprotein	1.19109	955.503	418.45	1.62218e-26	GO:0005634; GO:0005732; GO:0006364; GO:0019013; GO:0030529; GO:0034457
HmN_002150900	n/a	1.18995	545.643	237.433	2.43881e-15	GO:0015031
HmN_000049000	Far upstream (Fuse) binding protein	1.18929	11131.5	4879.97	2.28699e-79	GO:0003676; GO:0003723; GO:0006355
HmN_000806000	Expressed protein	1.18821	1334.05	583.263	2.89776e-23	GO:0016573; GO:0000123
HmN_000343900	Expressed conserved protein	1.18788	1336.82	586.993	1.35704e-17	GO:0008152; GO:0016491; GO:0055114
HmN_000103400	FAD dependent oxidoreductase domain containing protein	1.18777	1360.07	599.443	4.34225e-21	GO:0016491; GO:0055114
HmN_000669500	Deleted in lung and esophageal cancer protein 1	1.18613	144.433	63.97	1.49741e-06	n/a
HmN_002278600	n/a	1.18536	461.29	200.68	4.45422e-13	n/a
HmN_000120200	60S ribosomal protein L26	1.18513	18262	8021.55	2.15062e-49	GO:0003735; GO:0005840; GO:0006412; GO:0015934
HmN_000768300	DNA excision repair protein ERCC 8	1.1848	477.55	210.727	1.60659e-14	GO:0005515
HmN_000204300	Transcription factor a mitochondrial	1.18431	2146.5	944.763	3.7883e-18	n/a
HmN_000833500	RIMS binding protein 2	1.18367	341.723	147.32	7.06846e-06	GO:0005515
HmN_000417600	Uncharacterized oxidoreductase yrbE	1.1833	3005.25	1320.75	4.96219e-59	GO:0008152; GO:0016491; GO:0055114
HmN_000407200	UDP N acetylglucosamine transferase subunit	1.18248	1190.72	526.583	1.39845e-15	GO:0008152; GO:0016020; GO:0016021; GO:0016740; GO:0006488
HmN_000367000	n/a	1.17951	361.987	159.683	3.39544e-14	n/a
HmN_000775500	Germ cell less protein 1	1.17908	832.743	367.87	2.14461e-20	GO:0005515
HmN_000091900	Expressed protein	1.17859	601.17	263.4	3.47658e-14	n/a
HmN_000671600	n/a	1.17815	158.597	69.84	9.88177e-07	n/a
HmN_000204900	Forkhead box protein O4	1.17782	3273.85	1441.14	7.42891e-26	GO:0003677; GO:0003700; GO:0005634; GO:0006351; GO:0006355; GO:0043565
HmN_000228400	Rna recognition motif (Rrm) domain containing protein	1.17739	6594.08	2916.64	1.11589e-60	GO:0000166; GO:0003676
HmN_000318900	Splicing factor u2af 35 kDa subunit	1.17728	2459.57	1084.3	7.23739e-51	GO:0000166; GO:0003676; GO:0003723; GO:0005634; GO:0046872; GO:0000398; GO:0089701
HmN_000480900	Nucleotide binding, alpha beta plait	1.17607	3208.49	1414.1	1.20688e-32	GO:0000166; GO:0003676
HmN_000201200	n/a	1.17559	454.523	198.373	5.83414e-09	GO:0004930; GO:0007186; GO:0016021
HmN_000879600	Synaptogyrin 2	1.17429	806.99	356.97	9.29007e-18	GO:0016020; GO:0016021
HmN_000095000	Expressed protein	1.17288	2143.83	945.15	1.77416e-06	n/a
HmN_000203400	Ribosomal protein L11	1.1718	18305.7	8104.21	1.11898e-14	GO:0003735; GO:0005840; GO:0006412; GO:0030529
HmN_000555800	Cell cycle checkpoint control protein rad9a	1.17123	1025.77	457.44	2.16945e-23	GO:0000077; GO:0030896
HmN_000840400	Zinc finger transcription factor gli2	1.16972	3059.86	1356.39	1.32931e-19	GO:0003676; GO:0046872
HmN_000844700	Complement component 1 Q subcomponent binding	1.16912	5392.58	2393.85	2.56801e-31	GO:0005759
HmN_000896100	Ataxin 1	1.16864	473.143	208.68	2.62873e-07	GO:0003723; GO:0005515
HmN_000706800	Heterogeneous nuclear ribonucleoprotein k	1.16842	9458.28	4203.29	3.065e-72	GO:0003676; GO:0003723; GO:0019013; GO:0030529
HmN_002153600	n/a	1.16709	267.187	117.9	1.00132e-07	GO:0005856
HmN_000594100	Ribosome biogenesis protein brx1	1.1666	1758.41	783.243	2.69397e-21	n/a
HmN_002086000	n/a	1.16644	578.427	254.333	1.06588e-06	GO:0005509
HmN_000417500	Proteasome subunit beta type	1.16617	6496.72	2892.87	6.73771e-48	GO:0000502; GO:0004175; GO:0004298; GO:0005634; GO:0005737; GO:0005839; GO:0006508; GO:0008233; GO:0016787; GO:0051603
HmN_000320400	Lin1 protein	1.16542	641.11	286.073	4.80373e-20	n/a
HmN_000080900	Nuclear RNA export factor 1:2	1.1647	1498.96	670.013	1.54867e-33	GO:0005634; GO:0051028; GO:0005515
HmN_000826600	Nucleoporin p58:p45	1.16434	1534.06	682.833	7.98873e-27	GO:0005643; GO:0006913
HmN_002133600	n/a	1.1636	176.53	77.96	4.49204e-06	n/a
HmN_000065200	PRELI domain containing protein 1 mitochondrial	1.1623	745.947	332.273	4.9109e-13	n/a
HmN_000355700	Nucleotide binding protein	1.16123	542.827	242.063	7.13057e-18	n/a
HmN_002121600	n/a	1.16113	535.787	238.39	7.55945e-18	GO:0005515
HmN_000987300	n/a	1.1607	18642.6	8301.63	4.94611e-09	GO:0003735; GO:0006412; GO:0005840; GO:0004672; GO:0006468; GO:0005524; GO:0004713
HmN_000069200	n/a	1.16031	1690.09	751.447	2.88016e-23	GO:0016020; GO:0016021
HmN_000804000	n/a	1.15947	267.797	120.013	2.39439e-10	GO:0007094
HmN_000383200	Mitochondrial ribosomal protein S26	1.15926	1042.27	468.337	3.54791e-21	GO:0005763; GO:0005840
HmN_000153100	Ribosomal protein S3	1.15887	30046.7	13447.4	2.31013e-47	GO:0003723; GO:0003735; GO:0005840; GO:0006412; GO:0015935; GO:0030529
HmN_000395400	Exosome complex component RRP41	1.15558	763.153	342.243	1.08888e-23	n/a
HmN_000210700	n/a	1.15403	618.3	278.03	2.78478e-21	GO:0008152; GO:0015018; GO:0016020
HmN_002273500	n/a	1.15401	136.02	60.32	2.60575e-06	n/a
HmN_002221100	n/a	1.15196	455.53	205.78	2.25827e-15	GO:0007094
HmN_000418100	WD40 YVTN repeat containing domain	1.14973	2564.66	1155.42	1.2747e-57	GO:0005515
HmN_002122300	n/a	1.1494	1178.38	528.98	1.04128e-27	n/a
HmN_000459000	Iroquois	1.14909	5253.66	2369.5	4.9733e-64	GO:0004175; GO:0004298; GO:0005634; GO:0005839; GO:0006511; GO:0019773; GO:0051603
HmN_000741100	39S ribosomal protein L16, mitochondrial	1.14791	940.283	426.083	8.13357e-17	GO:0003735; GO:0005840; GO:0006412; GO:0019843
HmN_000038300	n/a	1.14722	1107.26	500.363	4.09454e-25	n/a
HmN_000689500	Transcription initiation factor tfiid subunit 9	1.14693	519.037	232.543	2.89798e-14	GO:0003743; GO:0006352; GO:0006413; GO:0046982
HmN_000253900	Brain protein 44	1.14632	1629.07	732.673	6.01073e-10	GO:0005743; GO:0006850; GO:0016020; GO:0016021
HmN_000228500	n/a	1.1452	205.583	92.96	3.17609e-07	n/a
HmN_000673500	Origin recognition complex subunit 5	1.1433	497.95	225.45	1.21339e-14	GO:0000808; GO:0005634; GO:0006260; GO:0005524
HmN_002133800	n/a	1.14325	227.287	102.29	1.63961e-08	GO:0016534; GO:0016533
HmN_001005100	n/a	1.14321	173.227	77.0733	4.50136e-06	n/a
HmN_000888400	Mitochondrial ribosomal protein l11	1.14313	1311.94	592.593	2.92969e-33	GO:0003735; GO:0005840; GO:0006412; GO:0030529
HmN_000866200	n/a	1.1429	177.193	80.9567	5.87461e-06	GO:0005509; GO:0007156; GO:0016020; GO:0007155; GO:0005886
HmN_000373200	Ring finger protein 113a	1.14101	730.363	330.037	3.86304e-19	GO:0008270; GO:0046872
HmN_000689200	n/a	1.1386	891.21	405.81	1.34786e-24	GO:0005515
HmN_000783700	Elongation factor 1-alpha	1.13752	251529	114250	4.53565e-44	GO:0000166; GO:0003746; GO:0003924; GO:0005525; GO:0005737; GO:0006414
HmN_000085700	RNA binding protein 39	1.1375	4656.89	2113.35	2.79463e-50	GO:0000166; GO:0003676; GO:0003723; GO:0005634; GO:0006397
HmN_000425200	Mitochondrial processing peptidase beta subunit	1.1371	8284.41	3766.9	1.51202e-72	GO:0003824; GO:0004222; GO:0006508; GO:0046872
HmN_000312600	n/a	1.13707	269.283	122.16	1.04404e-07	n/a
HmN_000538000	Proteasome 26s subunit subunit 4 atpase	1.13433	6377.92	2903.88	3.27429e-65	GO:0000166; GO:0000502; GO:0005524; GO:0005737; GO:0016787; GO:0030163; GO:0036402
HmN_000530800	Mitogen activated protein kinase kinase 1	1.13318	1748.7	793.693	1.51166e-16	GO:0016301; GO:0016310; GO:0032006
HmN_002002700	n/a	1.13222	450.247	202.903	2.92877e-11	GO:0008270; GO:0006355; GO:0003700; GO:0043565; GO:0005634
HmN_000493200	Serine:threonine protein kinase PAK 4	1.13096	758.397	345.19	7.62587e-17	GO:0000166; GO:0004672; GO:0005524; GO:0006468; GO:0016301; GO:0016310
HmN_000622200	Hydroxymethylglutaryl coenzyme A synthase	1.1302	1918.5	875.78	1.17011e-35	GO:0003824; GO:0004421; GO:0008152; GO:0008299
HmN_000416000	FUN14 domain containing protein 1	1.12836	1819.62	827.797	5.41169e-30	n/a
HmN_000916600	Chromatin regulatory protein sir2	1.12808	1208.7	552.033	2.15207e-26	GO:0006476; GO:0008270; GO:0016811; GO:0051287; GO:0070403; GO:0017136
HmN_000082100	Maf protein	1.12705	2341.92	1074.51	1.33802e-35	GO:0005737; GO:0047429
HmN_000758900	Armadillo repeat containing protein 3	1.12539	377.583	173.78	2.90636e-08	GO:0005488
HmN_000706400	Pantothenate kinase 4	1.12464	441.413	201.547	5.90158e-16	GO:0016301; GO:0016310
HmN_000382200	Pdz domain containing protein	1.1216	2168.29	997.34	7.9298e-31	GO:0005515
HmN_000224300	n/a	1.12105	1231.47	562.587	4.57276e-20	GO:0016020; GO:0016021; GO:0030246
HmN_002179700	n/a	1.12067	558.487	256.19	4.08436e-11	n/a
HmN_000554300	n/a	1.11979	826.397	377.993	1.09472e-22	n/a
HmN_000037300	Expressed conserved protein	1.11759	1749.37	801.903	2.24122e-22	n/a
HmN_000166200	Seryl-tRNA synthetase	1.11661	766.773	355.09	1.23457e-18	GO:0000166; GO:0004812; GO:0004828; GO:0005524; GO:0005737; GO:0006418; GO:0006434
HmN_000859300	Serine hydroxymethyltransferase	1.11613	3223.77	1486.06	2.56209e-34	GO:0003824; GO:0004372; GO:0006544; GO:0006563; GO:0006730; GO:0016740; GO:0030170; GO:0035999; GO:0019264
HmN_002013300	n/a	1.11588	303.537	138	4.05001e-08	n/a
HmN_002110500	n/a	1.11517	4010.8	1844.18	7.63524e-09	n/a
HmN_000006400	n/a	1.115	355.013	160.907	1.79035e-07	GO:0016020; GO:0016021
HmN_000537100	RhoGAP	1.11405	920.027	422.407	3.41756e-22	GO:0007165
HmN_000392800	Isopentenyl diphosphate delta isomerase	1.11363	544.1	249.417	2.70985e-07	GO:0005634; GO:0006352; GO:0016853
HmN_000423500	Armadillo type fold	1.11269	442.207	203.953	3.71109e-15	GO:0005488
HmN_002001600	n/a	1.11052	29596.2	13695.8	8.966e-47	GO:0005515
HmN_000589400	Formin	1.10818	1313.3	608.013	2.04625e-21	GO:0003779; GO:0016043; GO:0017048; GO:0030036; GO:0007010; GO:0008360; GO:0005488
HmN_000462400	Receptor protein-tyrosine kinase	1.108	328.607	151.223	5.42842e-11	GO:0000166; GO:0004672; GO:0004713; GO:0004714; GO:0005524; GO:0006468; GO:0007169; GO:0016020; GO:0016301; GO:0016310; GO:0016740; GO:0018108
HmN_000776300	Propionyl coenzyme A carboxylase beta chain	1.10791	693.933	323.033	8.05994e-17	GO:0003989; GO:0006633; GO:0009317; GO:0016874
HmN_000694400	Presenilin enhancer	1.1077	607.91	280.423	2.544e-10	GO:0016020; GO:0016021
HmN_000225400	Adenosylhomocysteinase	1.10745	7734.18	3589.65	3.63499e-42	GO:0004013; GO:0006730; GO:0016787; GO:0051287; GO:0019510
HmN_002061500	n/a	1.10693	502.663	232.717	1.93433e-14	n/a
HmN_000441100	n/a	1.10673	452.853	209.923	9.22808e-15	GO:0008152; GO:0080048
HmN_000288200	Leucine rich repeat, typical subtype	1.10648	525.297	243.617	1.21665e-07	GO:0016020; GO:0016021; GO:0005515
HmN_000421200	NF kappa B activating protein	1.10646	831.787	386.497	2.91646e-16	GO:0003682; GO:0007219; GO:0045892
HmN_000010100	alpha-1,2-Mannosidase	1.10637	3061.68	1422.23	2.5071e-40	GO:0004571; GO:0005509; GO:0008152; GO:0016020; GO:0016021; GO:0016787; GO:0016798
HmN_000781800	Expressed conserved protein	1.10593	507.92	235.813	7.42833e-15	n/a
HmN_000156400	Ribosomal pseudouridine synthase	1.10424	2125.06	988.55	8.50965e-48	GO:0001522; GO:0003723; GO:0009451; GO:0009982
HmN_002129700	n/a	1.1035	2096.19	977.647	2.27012e-23	GO:0003723; GO:0009982; GO:0001522; GO:0009451
HmN_000731900	Acyl protein thioesterase 2	1.10335	652.233	304.287	6.09762e-17	GO:0008152; GO:0016787
HmN_000519300	Thymidylate synthase	1.10255	1284.08	598.387	9.77472e-16	GO:0004799; GO:0006231; GO:0032259
HmN_002147100	n/a	1.10236	3834.48	1783.44	2.70006e-46	GO:0016020
HmN_000465400	n/a	1.10212	344.35	159.793	1.93733e-08	n/a
HmN_000123500	Neurogenic differentiation factor 1	1.10195	568.163	266.46	1.14463e-11	GO:0046983; GO:0048666
HmN_000880500	28S ribosomal protein S18b, mitochondrial	1.10026	1193.21	553.91	2.8825e-24	GO:0003735; GO:0005622; GO:0005840; GO:0006412
HmN_000682300	Expressed conserved protein	1.10002	660.727	305.527	1.59887e-11	n/a
HmN_000134900	Pleckstrin y type	1.09916	324.483	150.023	3.17858e-10	GO:0005158
HmN_000096700	Chloride channel protein	1.09884	1353.83	632.093	1.15986e-32	GO:0005216; GO:0005247; GO:0006810; GO:0006811; GO:0006821; GO:0016020; GO:0016021; GO:0034220; GO:0055085; GO:1903959
HmN_000006800	n/a	1.09708	710.037	331.657	3.12123e-09	GO:0045454; GO:0015035; GO:0006662
HmN_000531600	n/a	1.097	622.427	290.22	1.65232e-20	GO:0007165
HmN_000277000	Expressed conserved protein	1.09696	4032.49	1888.02	6.14511e-38	n/a
HmN_000239900	SAGA-associated factor 11	1.09281	591.197	274.58	9.18597e-11	GO:0005634
HmN_000115200	Secretion regulating guanine nucleotide exchange	1.09154	325.013	153.37	4.72246e-08	n/a
HmN_000620800	Dehydrodolichyl diphosphate synthase	1.09108	514.4	242.207	8.53072e-14	GO:0008152; GO:0016740; GO:0016765
HmN_000561800	Cationic amino acid transporter	1.08881	814.45	379.09	2.3682e-08	GO:0003333; GO:0015171; GO:0016020; GO:0016021; GO:0022857; GO:0055085
HmN_000063900	DNA primase	1.08761	559.773	264.707	6.18885e-13	GO:0003896; GO:0003899; GO:0006260; GO:0006269; GO:0016740; GO:1990077
HmN_000598900	Expressed conserved protein	1.08749	400.41	189.5	3.90547e-08	n/a
HmN_000675000	Septin 4	1.08694	3902.47	1835.19	7.94751e-36	GO:0000166; GO:0005525
HmN_000380600	Leucine rich repeat domain containing protein	1.08641	990.87	464.01	8.16904e-18	GO:0016020; GO:0016021; GO:0005515
HmN_002126700	n/a	1.08508	2240.25	1052.19	2.73479e-28	GO:0005515
HmN_000393900	Basic leucine zipper (BZIP) transcription factor	1.08318	1511.14	710.14	5.71913e-28	GO:0003677; GO:0003700; GO:0006355; GO:0016020; GO:0016021; GO:0043565
HmN_000365700	n/a	1.08292	862.657	406.203	8.81925e-09	GO:0003735; GO:0006412; GO:0005622; GO:0005840
HmN_002211600	n/a	1.08252	720.573	340.673	1.4678e-15	n/a
HmN_000527400	Calcineurin phosphoesterase	1.07732	1324.23	628.747	6.01991e-18	GO:0008152; GO:0016787
HmN_000487100	Roundabout 2	1.07694	2415.86	1145.36	4.96401e-38	GO:0016020; GO:0016021; GO:0005515
HmN_000280600	Putative tRNA (cytidine(32)/guanosine(34)-2'-O)-methyltransferase	1.07533	2031.02	965.833	4.14452e-29	GO:0001510; GO:0002128; GO:0002181; GO:0005737; GO:0008033; GO:0008168; GO:0008175; GO:0016740; GO:0032259; GO:0051301
HmN_000693900	15 kDa selenoprotein	1.07462	1085.14	511.707	2.81341e-14	n/a
HmN_000009300	Replication protein A 32 kDa subunit	1.07236	1369.12	651.467	1.68314e-13	GO:0003677; GO:0005634; GO:0006260; GO:0006281; GO:0006310
HmN_000948000	Mitochondrial ribosomal protein s35	1.07152	1467.72	699.293	8.7042e-30	GO:0005840
HmN_002187800	n/a	1.07063	1561.83	744.267	4.66746e-34	n/a
HmN_000097200	Eukaryotic translation initiation factor 2d	1.07053	1240.12	590.227	7.14906e-26	GO:0003743; GO:0006413
HmN_000119700	Methionyl tRNA synthetase, cytoplasmic	1.06915	2949.08	1408.37	3.8422e-33	GO:0000166; GO:0004812; GO:0004825; GO:0005524; GO:0005737; GO:0006418; GO:0006431
HmN_000488600	DEAD box ATP dependent RNA helicase	1.06846	681.643	322.337	9.76393e-18	GO:0000166; GO:0003676; GO:0004386; GO:0005524; GO:0008152; GO:0016787
HmN_000401100	Peripheral plasma membrane protein CASK	1.06819	686.773	328.66	1.3826e-18	GO:0004672; GO:0005524; GO:0006468; GO:0005515
HmN_002172000	n/a	1.06764	1816.25	864.29	4.56703e-27	GO:0003676; GO:0000166; GO:0003677; GO:0008408; GO:0003887; GO:0006281; GO:0019985; GO:0016035
HmN_000356300	Secretory carrier associated membrane protein	1.06761	2512.93	1197.12	9.71823e-40	GO:0015031; GO:0016020; GO:0016021
HmN_000290000	Lipase	1.06748	702.437	335.84	2.99769e-15	GO:0016042; GO:0016787; GO:0016788
HmN_000766700	RUN	1.06731	807.097	382.997	1.61e-19	GO:0005515
HmN_002178300	n/a	1.06689	1232.87	587.727	2.77168e-32	GO:0016757; GO:0016021
HmN_000710600	Protein FAM40A	1.06629	5998.41	2861.86	7.32801e-64	GO:0004672; GO:0005524; GO:0006468
HmN_002044500	n/a	1.06537	2058.19	981.107	5.67321e-33	GO:0003676; GO:0008270
HmN_000566300	RNA binding motif protein 22	1.06532	2720.88	1295.64	5.60786e-34	GO:0000166; GO:0003676; GO:0003723; GO:0046872
HmN_000272700	Nucleolar pre ribosomal associated protein	1.06473	1014.14	483.653	2.25455e-26	n/a
HmN_002129100	n/a	1.06338	236.53	113.607	2.8457e-06	n/a
HmN_000291000	Expressed protein	1.06329	3579.16	1712.58	1.18469e-33	GO:0016020; GO:0016021
HmN_000454400	Translocon associated protein subunit alpha	1.06315	4182.28	1998.8	3.04374e-32	GO:0005789; GO:0016020; GO:0016021
HmN_000297200	ATP dependent RNA helicase DDX55	1.06254	503.087	241.157	5.08052e-15	GO:0000166; GO:0003676; GO:0003723; GO:0004386; GO:0005524; GO:0008152; GO:0016787
HmN_000265800	n/a	1.05981	512.36	245.74	4.27152e-13	GO:0004672; GO:0005524; GO:0006468; GO:0004703; GO:0007165; GO:0004674
HmN_000598400	n/a	1.05952	230.693	109.26	6.08029e-06	GO:0005515
HmN_000599500	Bruno 4, RNA binding protein	1.05951	2284.41	1093.17	1.87892e-23	GO:0000166; GO:0003676
HmN_000812900	Gag pol polyprotein	1.05868	919.63	440.52	2.23938e-16	n/a
HmN_000129800	Expressed conserved protein	1.05837	427.373	205.167	6.54869e-08	n/a
HmN_000798200	Neuroendocrine protein 7b2	1.05702	1382.26	661.287	2.48403e-17	GO:0007218; GO:0030141
HmN_002061400	n/a	1.05681	5540.95	2661.3	1.49231e-40	GO:0004298; GO:0051603; GO:0005839; GO:0004175; GO:0006511; GO:0019773; GO:0000502
HmN_002122600	n/a	1.05625	819.923	394.143	8.2428e-12	GO:0000469
HmN_000612800	Rab3 GTPase activating protein catalytic subunit	1.05432	2311.84	1113.8	3.64975e-29	GO:0005096
HmN_000080500	Expressed conserved protein	1.05391	922.267	442.79	7.05412e-11	GO:0003676
HmN_000408100	Signal peptidase complex subunit 3	1.05348	4550.41	2190.77	5.93844e-28	GO:0005787; GO:0006465; GO:0008233; GO:0016021
HmN_000487200	XK-related protein	1.05314	1017.23	491.887	1.90184e-12	GO:0016020; GO:0016021
HmN_000291700	n/a	1.05208	731.923	354.86	2.4578e-14	GO:0016020; GO:0016021
HmN_000044700	Expressed protein	1.05193	3177.77	1533.21	1.43343e-31	n/a
HmN_000526700	Mitochondrial uncoupling protein	1.05167	730.57	353.1	1.05434e-14	GO:0006810; GO:0016020; GO:0016021
HmN_000017500	Zinc finger, MYND type	1.04866	2795.39	1353.55	3.07397e-25	GO:0046872; GO:0005515
HmN_000010800	Transcriptional enhancer factor TEF 5	1.048	1236.07	600.447	6.87258e-19	GO:0003700; GO:0005634; GO:0006355
HmN_000138500	Tubulin beta 2C chain	1.04791	66998.4	32389.2	1.50909e-50	GO:0000166; GO:0003924; GO:0005200; GO:0005525; GO:0005737; GO:0005856; GO:0005874; GO:0007017; GO:0008152
HmN_000584500	n/a	1.04772	80257.7	38815.1	3.23235e-101	GO:0003924; GO:0007017; GO:0005874; GO:0005200; GO:0005525
HmN_000561400	Histidine protein methyltransferase 1	1.0476	848.11	410.003	1.05666e-15	GO:0008168; GO:0016740; GO:0032259
HmN_000415900	n/a	1.04752	406.02	193.857	3.72496e-08	n/a
HmN_000874600	Dual specificity protein phosphatase	1.04627	263.413	126	2.78166e-08	GO:0006470; GO:0008138; GO:0016311; GO:0016791
HmN_000613400	Ubiquitin carboxyl terminal hydrolase 24	1.04576	609.367	292.477	4.57349e-15	GO:0006511; GO:0016020; GO:0016021; GO:0016579; GO:0016787; GO:0036459; GO:0005515
HmN_000710900	Wd40 repeat	1.04574	2027.72	982.03	1.59009e-36	GO:0005515
HmN_002115800	n/a	1.0431	1378.5	669.307	1.7804e-27	n/a
HmN_000776800	Methyltransferase protein 2	1.04301	600.123	290.64	4.25881e-14	GO:0008168; GO:0016740; GO:0032259
HmN_000737800	Ferrochelatase	1.0421	1255.88	607.88	1.2907e-26	GO:0004325; GO:0006779; GO:0006783; GO:0016829
HmN_000216500	n/a	1.04058	2173.76	1058.54	1.05299e-37	GO:0003735; GO:0006412; GO:0005840
HmN_000186700	Tubulin polyglutamylase ttll4	1.04018	5803.58	2821.02	2.66595e-48	GO:0005515; GO:0030234
HmN_002206800	n/a	1.03869	404.653	197.543	1.14785e-08	n/a
HmN_000215800	Neuronal calcium sensor	1.0385	910.903	440.367	4.14756e-10	GO:0005509; GO:0046872
HmN_002103200	n/a	1.03822	1765.11	859.11	3.27548e-29	n/a
HmN_000778100	n/a	1.03817	1277.47	621.363	2.04018e-11	n/a
HmN_000036500	LPS responsive vesicle trafficking, beach	1.03759	601.243	293.073	3.17278e-09	n/a
HmN_000031200	Proliferation associated protein 2G4	1.03617	7593.26	3705	3.57726e-48	GO:0003700; GO:0006355; GO:0007049
HmN_000711200	Myeloid ecotropic viral integration site	1.03553	4538.31	2206.53	5.06744e-11	GO:0003677; GO:0005634; GO:0006355
HmN_000072000	Zinc finger protein basonuclin 1	1.03508	386.587	189.347	9.16219e-12	GO:0046872; GO:0003676
HmN_000613100	2 oxoglutarate dehydrogenase	1.03389	6456.55	3150.57	3.21506e-64	GO:0004591; GO:0006099; GO:0008152; GO:0016624; GO:0030976; GO:0055114
HmN_000224000	Alpha tubulin N acetyltransferase	1.03248	668.46	328.357	5.67664e-16	GO:0005874; GO:0016740; GO:0019799; GO:0071929
HmN_000382500	Protocadherin 9	1.0319	1156.24	565.247	9.90081e-20	GO:0005509; GO:0005886; GO:0007155; GO:0007156; GO:0016020; GO:0016021
HmN_000437000	TFIIH C1, C terminal	1.03137	465.62	227.913	2.17466e-10	GO:0000439; GO:0006281; GO:0006289; GO:0006351; GO:0008270; GO:0046872; GO:0003676
HmN_000848600	Expressed conserved protein	1.03107	4459.88	2180.72	1.36506e-26	n/a
HmN_000403300	n/a	1.03061	334.09	164.25	1.90892e-09	GO:0016020; GO:0016021
HmN_000601600	General transcription factor IIF, polypeptide 2	1.03056	1092.69	533.213	7.85913e-28	GO:0003824; GO:0005674; GO:0006366; GO:0006367
HmN_000446200	Ribosomal protein rpl13a	1.02942	33067.5	16179.5	8.598e-20	GO:0003735; GO:0005840; GO:0006412; GO:0015934
HmN_000633600	DEAD (Asp Glu Ala Asp) box polypeptide 21	1.029	950.36	467.14	3.15929e-21	GO:0003676; GO:0003723; GO:0004386; GO:0005524; GO:0005634; GO:0008152; GO:0016787
HmN_000663800	Diacylglycerol kinase theta	1.02672	591.84	287.85	2.73952e-09	GO:0005622; GO:0016301; GO:0016310; GO:0035556; GO:0046872
HmN_000083800	GPI anchored wall transfer protein 1	1.02635	794.2	391.503	6.61234e-16	GO:0005789; GO:0006506; GO:0016020; GO:0016021; GO:0016746
HmN_000828400	Caspase	1.02635	579.07	282.777	1.88706e-12	GO:0004197; GO:0006508; GO:0006915; GO:0008233; GO:0008234; GO:0016787
HmN_000505500	Carboxyl terminal PDZ ligand of neuronal nitric	1.02625	554.077	272.453	1.55721e-13	GO:0005515
HmN_001002400	Methyltransferase protein 6	1.02612	369.817	180.51	7.55458e-07	GO:0008168; GO:0016740; GO:0032259
HmN_000667600	Expressed protein	1.02567	1457.6	714.81	9.62223e-24	GO:0003677
HmN_000271000	Iron sulfur cluster assembly enzyme ISCU	1.02522	2033.6	999.11	5.3295e-27	GO:0005506; GO:0016226; GO:0051536
HmN_000866300	Soluble guanylate cyclase gcy	1.02478	348.163	169.053	4.20962e-09	n/a
HmN_000826100	F box and wd40 domain protein	1.02441	578.097	280.617	2.24029e-08	GO:0005515
HmN_000450800	n/a	1.02281	1030.37	507.033	1.00011e-13	GO:0000049; GO:0004812; GO:0005524; GO:0043039; GO:0005737; GO:0000166; GO:0004826; GO:0006432
HmN_002291800	n/a	1.02257	205.147	100.98	9.60029e-07	n/a
HmN_000425100	Eukaryotic translation elongation factor 1	1.02203	29176.3	14361.2	3.91491e-44	GO:0003746; GO:0006412; GO:0006414; GO:0005515
HmN_000517300	Ring finger protein 150	1.02124	2454.39	1206.64	1.40361e-42	GO:0008270; GO:0016020; GO:0016021; GO:0046872
HmN_000057500	Expressed protein	1.02036	1173.93	577.51	1.67546e-12	n/a
HmN_000710800	Groucho 2	1.02018	4350.36	2140.69	3.70423e-31	GO:0005634; GO:0006355; GO:0005515
HmN_000093200	Transformer 2 protein	1.01951	2974.32	1467.86	8.64904e-32	GO:0000166; GO:0003676
HmN_000200000	CUE domain containing protein 2 B	1.01944	1040.53	512.58	4.35604e-14	n/a
HmN_000715300	n/a	1.01926	421.117	206.29	5.83357e-08	n/a
HmN_000694000	15 kDa selenoprotein	1.01895	2707.49	1331.53	6.3542e-26	GO:0005515
HmN_000357500	Aryl hydrocarbon receptor nuclear	1.01868	1690.31	832.96	2.01317e-32	GO:0046983
HmN_000161200	n/a	1.01835	1052.2	520.17	4.42062e-25	GO:0016787
HmN_000484900	Expressed conserved protein	1.01805	504.96	249.993	1.48488e-10	n/a
HmN_000382400	EGF region	1.01665	2881.62	1425.53	5.05903e-48	GO:0016020; GO:0016021
HmN_000560600	Transcription initiation factor TFIID subunit	1.01562	361.583	177.727	3.88957e-08	GO:0003743; GO:0005669; GO:0006352; GO:0006413; GO:0003700; GO:0006355
HmN_000491700	Transcriptional adapter 2B	1.01547	998.563	495.017	2.79537e-20	n/a
HmN_000908400	Par cell polarity protein partition defective	1.01537	822.063	403.743	1.79237e-13	GO:0005515
HmN_002129800	n/a	1.01455	10816.2	5355.23	1.81273e-36	n/a
HmN_000104500	Antolefinin (Antolefinine)	1.01421	2127.68	1054.08	2.9482e-19	GO:0007049; GO:0017053
HmN_000144800	GC rich sequence DNA binding factor 1	1.01411	1583.79	782.593	3.68416e-21	GO:0003677; GO:0003700; GO:0005634; GO:0006355
HmN_000884600	SUMO-conjugating enzyme	1.0134	3277.73	1617.95	4.65835e-09	GO:0000166; GO:0005524; GO:0016874; GO:0016925; GO:0019789
HmN_000061900	ATP dependent RNA helicase DDX3X	1.01068	1972.08	977.477	3.02423e-23	GO:0000166; GO:0003676; GO:0004386; GO:0005524; GO:0008152; GO:0016787
HmN_002070600	n/a	1.01035	2093.32	1037.77	4.69066e-25	n/a
HmN_000133700	Atpase inhibitor protein	1.00999	5379.91	2664.17	1.04869e-08	GO:0005739; GO:0032780; GO:0042030
HmN_000470800	Histone H2A	1.009	2547.45	1267.67	2.85004e-22	GO:0000786; GO:0003677; GO:0005634; GO:0005694; GO:0046982
HmN_000080000	Tubulin polyglutamylase ttll9	1.00724	10640.3	5291.55	1.0088e-44	GO:0006464
HmN_000737300	Expressed conserved protein	1.00657	1264.57	629.39	4.296e-24	n/a
HmN_002123400	n/a	1.00562	935.367	462.687	3.68319e-17	GO:0003723; GO:0016779; GO:0006396
HmN_000728300	n/a	1.00419	1943.57	965.557	3.6843e-08	GO:0016192; GO:0016021
HmN_000088600	Isocitrate dehydrogenase (NAD+)	1.00356	3376.64	1686.31	1.27278e-25	GO:0000287; GO:0004449; GO:0006099; GO:0016616; GO:0051287; GO:0055114
HmN_000330500	Clathrin light chain	1.00256	4873.3	2430.17	6.51295e-28	GO:0005198; GO:0006886; GO:0016192; GO:0030130; GO:0030132
HmN_000224500	Peptidyl prolyl cis trans isomerase FKBP5	1.00235	1753.08	874.83	3.02947e-29	GO:0008152; GO:0016853; GO:0005515
HmN_000732100	Expressed conserved protein	1.00186	1393.45	692.257	4.92615e-20	n/a
HmN_000457600	Mechanosensory protein 2	1.00184	619.933	309.02	2.8145e-11	GO:0016020; GO:0016021
HmN_000746500	Probable D tyrosyl tRNATyr deacylase 2	1.0015	539.023	269.093	2.19002e-06	GO:0005737; GO:0016788; GO:0019478; GO:0002161; GO:0051499
HmN_000827000	RNA binding protein 15B	1.00094	2811.93	1401.2	2.54877e-21	GO:0000166; GO:0003676
HmN_000707600	n/a	0.999936	297.527	147.7	1.58169e-06	GO:0016491; GO:0055114
HmN_000714800	n/a	0.999197	301.73	149.77	1.26082e-08	n/a
HmN_000459300	Tubulin delta chain	0.99827	430.4	216.213	8.00687e-10	GO:0000166; GO:0003924; GO:0005200; GO:0005525; GO:0005874; GO:0007017; GO:0008152
HmN_000307400	Sine oculis homeobox 1/2	0.998094	195.933	96.4267	3.87595e-06	GO:0003677; GO:0005634; GO:0006355; GO:0043565; GO:0003700; GO:0006915; GO:0008283; GO:0048513
HmN_000424400	Acylamino acid releasing enzyme	0.998018	7153.89	3581.31	8.55884e-59	GO:0006508; GO:0008236; GO:0005515
HmN_000292000	Translocation protein SEC63	0.996464	2190.97	1100.03	1.86081e-26	GO:0016020; GO:0016021; GO:0031204; GO:0030176
HmN_000627400	Mitochondrial fission 1 protein	0.996168	2192.79	1096.16	2.58194e-10	GO:0000266; GO:0016020; GO:0016021; GO:0005515
HmN_000721300	Synaptogyrin	0.996145	501.92	250.563	5.56557e-08	GO:0016020; GO:0016021
HmN_000638700	Suppressor of hairy wing	0.996082	2739.29	1375	8.78336e-22	GO:0046872; GO:0003676
HmN_000129600	DNA directed RNA polymerase III subunit	0.995242	544.23	274.177	6.80078e-10	GO:0003899; GO:0006351
HmN_000802000	Pre mRNA splicing factor 38B	0.995224	2029.83	1017.52	5.11225e-41	n/a
HmN_000046700	NEFA interacting nuclear protein NIP30, N terminal	0.994969	1168.98	585.903	5.49059e-25	n/a
HmN_000289300	LIM binding protein	0.994786	1958.68	982.107	3.50935e-35	n/a
HmN_000117600	Methyltransferase protein 5	0.994273	551.693	276.65	2.1134e-12	GO:0003676; GO:0008168; GO:0016740; GO:0032259
HmN_000156200	n/a	0.992884	452.217	224.073	1.26276e-07	GO:0005515
HmN_000828200	Protein YIPF	0.992873	967.313	483.487	5.13703e-20	GO:0016020; GO:0016021
HmN_000560400	Transmembrane protein 161B	0.989614	1911.4	964.527	3.43039e-34	GO:0016020; GO:0016021
HmN_000506000	Expressed protein	0.989005	1378.98	691.267	6.58426e-06	GO:0015992; GO:0016471; GO:0016820; GO:0055085; GO:0042626
HmN_000619100	Stomatin protein 2	0.988125	2428.11	1222.82	6.10981e-41	GO:0016020
HmN_000550300	Axis inhibition protein axin	0.987874	4831.39	2436.44	2.65924e-24	n/a
HmN_000869200	VPS33B interacting protein	0.987109	789.05	398.7	6.97356e-18	n/a
HmN_000015900	ATP synthase subunit gamma	0.985929	8337.97	4210.98	1.16727e-56	GO:0006754; GO:0006810; GO:0006811; GO:0015986; GO:0015992; GO:0016301; GO:0016310; GO:0045261; GO:0046933; GO:0046961
HmN_002065800	n/a	0.984943	1568.9	794.353	1.59265e-22	GO:0005509; GO:0005544
HmN_000673300	Ubiquitin modifier activating enzyme ATG7	0.98487	2802.77	1418.96	1.09225e-23	GO:0005737; GO:0006914; GO:0008152; GO:0008641
HmN_000327400	Ras protein Rab 11A	0.984311	2735.99	1384.24	9.91547e-18	GO:0000166; GO:0003924; GO:0005525; GO:0005622; GO:0006886; GO:0006913; GO:0007165; GO:0007264; GO:0008152; GO:0015031; GO:0016020
HmN_002131400	n/a	0.98396	939.2	473.03	5.15541e-06	n/a
HmN_000391300	Microsomal glutathione S transferase	0.983324	6689.28	3376.54	4.50133e-10	GO:0008152; GO:0016020; GO:0016021; GO:0016740
HmN_000783600	26S proteasome non ATPase regulatory subunit	0.98331	892.98	453.007	4.1646e-18	GO:0000502; GO:0070682
HmN_000569700	U2 small nuclear ribonucleoprotein B	0.980102	1141.52	580.093	1.75727e-16	GO:0000166; GO:0000398; GO:0003676; GO:0017069; GO:0019013; GO:0030529
HmN_000497100	Cardiolipin synthase	0.979526	434.787	221.067	5.61668e-12	GO:0008654; GO:0016020; GO:0016021; GO:0016780
HmN_000205700	Splicing factor 3b subunit 4	0.978739	1400.19	712.01	2.2023e-18	GO:0000166; GO:0003676
HmN_000798600	Cop9 signalosome complex subunit 2	0.97819	452.11	229.523	1.25684e-06	GO:0005515
HmN_000866100	Mitochondrial ribosomal protein l43	0.97789	940.857	475.04	6.68017e-17	GO:0005840
HmN_000709600	Expressed protein	0.975798	1454.33	738.927	1.02415e-15	GO:0004583; GO:0005789; GO:0006488; GO:0016020; GO:0016021
HmN_000254900	Hepatocyte nuclear factor 4 alpha	0.974013	205.917	104.837	4.54803e-07	GO:0003677; GO:0003700; GO:0003707; GO:0005634; GO:0006351; GO:0006355; GO:0008270; GO:0043401; GO:0043565; GO:0046872
HmN_000232500	Ubiquitin conjugating enzyme E2 D2	0.973798	10820.8	5495.44	8.29885e-10	GO:0000166; GO:0005524; GO:0008152; GO:0016874
HmN_000156000	Mitochondrial import receptor subunit tom40	0.970707	1619.02	824.92	2.88319e-28	GO:0005741; GO:0055085
HmN_000159800	Expressed conserved protein	0.97031	496.6	251.12	5.74168e-09	n/a
HmN_000032000	Transcription initiation factor TFIID subunit	0.9698	870.77	445.607	9.03983e-12	GO:0003743; GO:0005669; GO:0006352; GO:0006413; GO:0046982
HmN_000433200	UDP glucose:glycoprotein glucosyltransferase 1	0.968788	641.057	327.583	9.34352e-12	GO:0003980; GO:0006486; GO:0016740; GO:0016757; GO:0097359
HmN_000678500	n/a	0.968282	832.01	425.993	1.32212e-20	GO:0006888; GO:0000139; GO:0005801; GO:0016021
HmN_002012500	n/a	0.967436	2506.41	1284.26	1.57128e-28	GO:0005506; GO:0016705; GO:0020037; GO:0055114; GO:0008270; GO:0006355; GO:0043401; GO:0003700; GO:0043565; GO:0005634; GO:0003677; GO:0003707
HmN_000833600	Guanine nucleotide binding protein subunit	0.966911	929.09	474.547	9.56522e-22	GO:0007165; GO:0005515
HmN_000431400	Transmembrane protein 104	0.966525	2542.46	1300.47	6.57044e-20	GO:0016020; GO:0016021
HmN_000317100	Cytosolic carboxypeptidase 2	0.966195	170.14	86.8767	9.62535e-06	GO:0004180; GO:0004181; GO:0006508; GO:0008270
HmN_000555600	n/a	0.965837	265.783	136.107	5.8542e-07	n/a
HmN_000467000	n/a	0.965664	12436.4	6363.82	6.91194e-54	GO:0003723; GO:0003676
HmN_002117700	n/a	0.964931	696.507	357.04	2.08453e-13	n/a
HmN_000120900	Lamin	0.963955	7306.76	3747.86	9.95103e-42	GO:0005198; GO:0005882
HmN_000550400	SPARC protein	0.963875	2496.45	1277.98	9.39364e-22	n/a
HmN_002121800	n/a	0.96385	544.517	275.93	3.41988e-08	GO:0005509; GO:0007156; GO:0016020; GO:0007155; GO:0005886
HmN_000574700	Ubiquitin carboxyl terminal hydrolase 22	0.96023	609.397	311.407	1.23787e-15	GO:0006508; GO:0006511; GO:0008233; GO:0008234; GO:0008270; GO:0016579; GO:0016787; GO:0036459; GO:0046872
HmN_000071300	Cytochrome P450	0.960204	601.787	307.377	3.88899e-10	GO:0005506; GO:0016020; GO:0016021; GO:0016705; GO:0020037; GO:0055114
HmN_000029600	DNA repair helicase rad3:xp d	0.960061	293.76	148.423	2.36346e-06	GO:0000166; GO:0003676; GO:0003677; GO:0004003; GO:0004386; GO:0005524; GO:0005634; GO:0006139; GO:0006289; GO:0008026; GO:0016787; GO:0016818; GO:0032508
HmN_000073600	n/a	0.959927	635.367	327.64	3.41599e-07	GO:0000287; GO:0008897
HmN_000156900	Phosphatidylserine decarboxylase	0.958852	1160.29	599.113	2.86798e-18	GO:0004609; GO:0008654
HmN_000350600	Integral membrane protein GPR155	0.958786	1640.24	845.857	4.97428e-20	GO:0016020; GO:0016021; GO:0055085
HmN_000002400	SH3 and multiple ankyrin repeat domains protein	0.957709	828.763	426.957	7.28949e-16	GO:0005515
HmN_002223100	n/a	0.957266	476.123	244.367	1.77587e-11	n/a
HmN_002131500	n/a	0.956909	1802.05	928.03	2.04104e-29	GO:0045454; GO:0015035; GO:0006662
HmN_000125300	Bifunctional polynucleotide	0.95476	2228.3	1150.67	9.22778e-18	n/a
HmN_000899600	Expressed protein	0.95456	12296.6	6337.03	2.97179e-14	n/a
HmN_000139300	Neighbor of COX4	0.95351	1738.8	899.517	6.00821e-23	n/a
HmN_000173000	Ankyrin repeat domain containing protein 10	0.95255	595.263	305.703	6.43194e-14	GO:0005515
HmN_000467500	Expressed protein	0.952473	923.23	478.227	1.97011e-11	n/a
HmN_000625300	Histone deacetylase	0.951852	883.22	456.197	1.31222e-18	GO:0004407; GO:0005634; GO:0006351; GO:0006355; GO:0016575; GO:0016787; GO:0032041; GO:0070932
HmN_000562920	n/a	0.951674	246.87	127.25	1.64827e-07	GO:0001510; GO:0008168; GO:0032259
HmN_000712300	Nodal modulator 1	0.951634	4422.86	2286.66	2.27191e-25	n/a
HmN_000226700	Actin protein 2:3 complex subunit 2	0.951483	2657.63	1377.37	1.15115e-27	GO:0005885; GO:0015629; GO:0030833; GO:0034314; GO:0030041
HmN_000297800	Mitochondrial 28S ribosomal protein S29	0.950835	1342.81	692.91	1.53846e-26	GO:0005761; GO:0005840; GO:0006915; GO:0015935
HmN_000211600	Ribosomal protein	0.950826	25072	12963.2	3.02822e-47	GO:0003723; GO:0003735; GO:0005840; GO:0006412; GO:0015935; GO:0030529
HmN_000792800	Expressed protein	0.950679	606.133	312.127	3.17348e-13	n/a
HmN_000017400	n/a	0.946243	1401.96	725.347	1.31872e-21	GO:0003677
HmN_000076900	Growth factor receptor bound protein	0.945328	1273.38	659.373	1.54269e-26	GO:0000166; GO:0001510; GO:0003676; GO:0006396; GO:0008173
HmN_000404200	Striatin	0.944831	1803.17	937.207	3.50731e-21	GO:0005515
HmN_000026500	ATP dependent RNA helicase DHX34	0.941554	1382.44	718.843	1.90278e-21	GO:0000166; GO:0004386; GO:0005524; GO:0008152; GO:0016787
HmN_000756400	Cytochrome b5 reductase 4	0.940514	908.243	472.283	1.83876e-15	GO:0016491; GO:0020037; GO:0046872; GO:0055114
HmN_000861600	Expressed protein	0.940387	418.357	217.287	1.5441e-11	n/a
HmN_000648100	Rho GTPase activating protein 39	0.935845	1819.96	954.043	7.57539e-16	GO:0005856; GO:0007165; GO:0005515
HmN_000289900	Expressed conserved protein	0.935149	3246.68	1698.51	1.61418e-32	n/a
HmN_000075400	Expressed protein	0.933752	3614.85	1890.47	4.09268e-40	GO:0000166; GO:0003676; GO:0004386; GO:0005524; GO:0008152; GO:0016787
HmN_000322500	F8A1-like protein	0.93368	1698.72	889.413	3.07885e-17	GO:0005515
HmN_000100100	RNA binding protein fox 1 3	0.933203	4194.21	2192.92	5.37049e-17	GO:0000166; GO:0003676; GO:0003723
HmN_000912300	Dna repair protein rad51 1	0.932301	2006.39	1051.78	1.41311e-12	GO:0003677; GO:0005524; GO:0006281; GO:0008094
HmN_000834400	Probable cytosolic iron-sulfur protein assembly protein CIAO1 homolog	0.932025	896.013	468.327	8.74942e-21	GO:0016226; GO:0097361; GO:0005515
HmN_000266000	n/a	0.931413	600.507	312.403	8.67215e-10	GO:0004525; GO:0006396
HmN_000152500	Arginyl tRNA synthetase	0.931341	407.093	214.013	5.53948e-07	GO:0000166; GO:0004812; GO:0004814; GO:0005524; GO:0006418; GO:0006420
HmN_000600300	Sugar phosphate exchanger	0.931097	1035.57	539.123	1.45096e-07	GO:0005215; GO:0006810; GO:0016020; GO:0016021; GO:0055085; GO:0022857
HmN_000305700	Glutaredoxin 3	0.930938	3921.96	2056.33	9.77014e-21	GO:0005623; GO:0009055; GO:0015035; GO:0045454; GO:0055114
HmN_000709000	n/a	0.930839	8844.65	4633.83	7.87742e-20	GO:0003676
HmN_000052700	n/a	0.929743	640.533	335.303	4.24009e-12	n/a
HmN_000859500	Selenoprotein t	0.929601	4541.3	2384.53	1.8122e-17	GO:0016020; GO:0016021
HmN_000635300	Polyadenylate-binding protein	0.929231	99230.9	52090.4	6.89597e-48	GO:0000166; GO:0003676; GO:0003723; GO:0005737
HmN_000121700	Twinfilin 1	0.928982	2143.62	1126.11	3.94608e-36	GO:0003779; GO:0005622; GO:0030837
HmN_000189500	Expressed protein	0.928351	1005.4	528.15	1.56701e-10	n/a
HmN_000139200	Zinc finger protein 40	0.927777	229.257	120.593	4.05627e-07	GO:0003676; GO:0046872
HmN_000426300	n/a	0.92664	450.01	235.377	1.03938e-08	n/a
HmN_000847000	n/a	0.926094	835.32	441.123	2.67765e-16	n/a
HmN_000113100	Glycolipid transfer protein domain containing protein	0.92609	784.05	409.823	9.09121e-10	GO:0005737; GO:0017089; GO:0046836; GO:0051861
HmN_000348800	n/a	0.925326	645.453	336.137	3.82696e-06	GO:0005515
HmN_000384000	Ribosome biogenesis protein BMS1	0.92518	1333.18	703.077	1.09752e-23	GO:0000166; GO:0005524; GO:0005634; GO:0042254
HmN_000025300	Eukaryotic translation initiation factor 3	0.924537	5661.92	2982.55	6.09513e-34	GO:0003743; GO:0005737; GO:0005852; GO:0006413; GO:0005515
HmN_000196900	E2F associated phosphoprotein	0.924535	1036.31	547.367	6.92992e-16	n/a
HmN_000349100	Deoxyhypusine hydroxylase	0.924281	3452.75	1820.48	5.76916e-23	GO:0004497; GO:0008612; GO:0016491; GO:0019135; GO:0046872; GO:0055114; GO:0005488
HmN_000694500	Expressed conserved protein	0.924053	513.18	269.633	1.40397e-08	n/a
HmN_000027200	Nuclear pore complex protein Nup54	0.922875	957.387	504.467	1.55216e-21	GO:0005643
HmN_002126100	n/a	0.921953	643.953	339.397	9.20247e-14	n/a
HmN_001016400	Ribosomal RNA small subunit methyltransferase	0.921721	855.74	451.507	3.62135e-13	GO:0008168; GO:0016740; GO:0032259
HmN_000563400	Apoptosis inhibitor 5	0.921599	3702.35	1952.05	3.19569e-24	GO:0005488
HmN_000620400	Expressed protein	0.921139	704.77	373.45	7.38864e-11	GO:0003676
HmN_000083300	n/a	0.919479	424.423	224.88	1.6518e-08	GO:0016746; GO:0006506; GO:0016021
HmN_000168400	Prenylcysteine oxidase	0.918676	1331.59	706.617	2.92649e-21	GO:0001735; GO:0016491; GO:0016670; GO:0030328; GO:0055114
HmN_000773300	Calcium dependent secretion activator 1	0.918395	288.79	154.063	9.02927e-07	GO:0016079; GO:1990504
HmN_000474900	Fibroblast growth factor receptor 4	0.918097	368.533	194.3	2.90019e-10	GO:0004672; GO:0005524; GO:0006468; GO:0004713
HmN_000250900	Serine:threonine protein kinase PRP4	0.91808	1762.54	933.597	4.87781e-30	GO:0004672; GO:0005524; GO:0006468; GO:0016301; GO:0016310
HmN_002140300	n/a	0.917895	255.533	133.85	1.00796e-06	n/a
HmN_000602000	Protein patched homolog 1	0.91727	2435.2	1288.15	8.52847e-25	GO:0016020; GO:0016021
HmN_000170100	Centrosomal protein of 104 kDa	0.91726	1296.33	683.18	1.02937e-15	n/a
HmN_000419400	Carnitine O palmitoyltransferase 2	0.916948	898.877	475.5	7.60641e-19	GO:0008152; GO:0016740; GO:0016746
HmN_000435400	Chromobox protein 1	0.91648	4135.3	2190.81	5.39957e-24	GO:0005634
HmN_000078600	n/a	0.915206	245.157	129.74	3.74632e-07	GO:0000179; GO:0008649; GO:0000154
HmN_000825400	Nuclear ribonuclease Z	0.914694	941.33	500.79	2.62895e-14	n/a
HmN_000530600	F box only protein 7	0.913991	1207.67	639.637	4.48112e-19	GO:0005515
HmN_000275500	Dynein light chain	0.913719	1292.26	683.54	9.14374e-08	GO:0005875; GO:0007017; GO:0030286
HmN_002146200	n/a	0.911673	207.167	109.927	1.53135e-06	n/a
HmN_000652700	n/a	0.910405	397.14	211.943	4.94141e-09	n/a
HmN_000219900	Apolipoprotein A I binding protein	0.910196	1530.1	816.14	1.22439e-10	n/a
HmN_000830300	Isoleucyl tRNA synthetase, mitochondrial	0.907586	2254.91	1198.53	6.70804e-17	GO:0000166; GO:0002161; GO:0004812; GO:0004822; GO:0005524; GO:0005737; GO:0006418; GO:0006428; GO:0006450
HmN_000018400	Histone deacetylase	0.905917	5499.42	2933.82	5.87329e-43	GO:0004407; GO:0005634; GO:0006351; GO:0006355; GO:0016575; GO:0016787; GO:0032041; GO:0070932
HmN_000761600	Expressed conserved protein	0.904539	506.607	272.237	4.4293e-06	n/a
HmN_000299400	CDP diacylglycerol inositol	0.903491	2043.97	1091.57	4.66632e-24	GO:0008654; GO:0016020; GO:0016021; GO:0016740; GO:0016780
HmN_000829400	Protein piccolo	0.902492	436.87	231.963	1.72747e-06	GO:0005622; GO:0006886; GO:0017137; GO:0005515
HmN_000513900	WD repeat containing protein 91	0.901814	946.557	504.403	5.04146e-17	n/a
HmN_000535500	Coatomer protein complex, subunit zeta 1	0.900482	2555.43	1362.92	4.68842e-06	GO:0006810; GO:0015031; GO:0016020
HmN_000865300	Expressed conserved protein	0.900245	1578.45	845.673	3.43764e-17	GO:0003735; GO:0005739
HmN_000031500	Presenilin	0.900004	1918.98	1029.26	6.91497e-31	GO:0000139; GO:0004190; GO:0005783; GO:0005789; GO:0005794; GO:0006508; GO:0007219; GO:0008233; GO:0016020; GO:0016021; GO:0016787; GO:0016485
HmN_000387400	n/a	0.899969	26100.4	13966.9	4.4742e-13	GO:0003676; GO:0008270
HmN_000320000	n/a	0.898059	1092.77	583.353	3.89632e-16	GO:0005515; GO:0004674; GO:0006468; GO:0006915; GO:0005488
HmN_000474400	Peptidoglycan binding lysin subgroup	0.897863	841.167	451.563	6.17806e-07	n/a
HmN_000722300	Cadherin	0.89777	478.437	255.893	9.56245e-11	GO:0005509; GO:0005886; GO:0007155; GO:0007156; GO:0016020; GO:0016021
HmN_000095200	Mediator of RNA polymerase II transcription	0.89609	453.71	242.197	1.25989e-09	GO:0001104; GO:0006357; GO:0016592
HmN_000312400	n/a	0.894112	4341.41	2333.42	6.19519e-40	GO:0005515; GO:0003723; GO:0003743; GO:0031369; GO:0006413; GO:0005852
HmN_000033100	Expressed conserved protein	0.893491	950.617	512.313	1.4795e-13	n/a
HmN_000157800	AT rich interactive domain containing protein	0.892786	725.68	388.507	1.45419e-06	GO:0003677
HmN_000025800	n/a	0.892537	7449.15	4006.69	1.09628e-12	n/a
HmN_000343200	Deoxyribonuclease TATDN1	0.891352	1083.54	583.233	2.80766e-17	GO:0006259; GO:0016888; GO:0016788
HmN_000573400	Myosin regulatory light chain 2 smooth muscle	0.890948	9035.27	4872.21	9.86082e-25	GO:0005509
HmN_000669400	Histone H1 delta	0.890825	10493.8	5650.89	5.91498e-09	GO:0000786; GO:0003677; GO:0005634; GO:0005694; GO:0006334
HmN_002275800	n/a	0.890673	717.307	387.443	4.40542e-14	GO:0005488
HmN_000489700	n/a	0.890654	974.987	521.51	3.01933e-09	GO:0005515
HmN_000834000	Expressed conserved protein	0.890372	834.137	445.81	5.2552e-06	n/a
HmN_000892600	Syntaxin binding protein 1	0.890245	2830.64	1528.63	3.00128e-26	GO:0005623; GO:0006904; GO:0016192
HmN_000374300	Blocked early in transport 1	0.889277	356.227	192.093	6.66417e-07	GO:0016020; GO:0016021
HmN_000003600	Glutamate synthase	0.888808	2761.29	1486.54	9.59482e-08	GO:0003824; GO:0006537; GO:0006807; GO:0008152; GO:0015930; GO:0016491; GO:0016638; GO:0016639; GO:0051536; GO:0055114; GO:0005506; GO:0010181; GO:0016040; GO:0045181; GO:0050660
HmN_000094600	Lysosomal trafficking regulator	0.887271	1094.11	593.013	4.88913e-17	n/a
HmN_000778800	n/a	0.887091	1392.24	750.863	8.33583e-25	GO:0030014
HmN_000515700	Expressed conserved protein	0.885691	285.313	153.717	1.57329e-06	n/a
HmN_000615000	Nuclear pore complex protein Nup188	0.884616	1267.3	683.547	2.48463e-18	n/a
HmN_000170500	Spectrin beta chain	0.883873	747.663	404.22	4.83535e-14	GO:0003779; GO:0005515
HmN_000889600	n/a	0.882149	1200.4	649.06	4.54677e-21	n/a
HmN_002018500	n/a	0.881446	457.557	249.293	4.03832e-11	GO:0055085
HmN_000479400	Dihydrolipoyllysine residue succinyltransferase	0.881176	4820.51	2618.25	1.80039e-49	GO:0004149; GO:0006099; GO:0008152; GO:0016740; GO:0016746; GO:0045252
HmN_000783100	n/a	0.88051	956.37	516.433	5.23741e-12	GO:0016020; GO:0016021
HmN_000269500	Smu 1 suppressor of mec 8 and unc 52	0.880344	1842.38	1002.53	6.25305e-26	GO:0005515
HmN_002209000	n/a	0.880318	3961.18	2146.85	4.22754e-22	n/a
HmN_000623900	n/a	0.8776	2818.29	1533.48	1.90758e-31	GO:0000184
HmN_000065400	Haloacid dehalogenase hydrolase	0.876864	1974.69	1074.96	6.48057e-24	GO:0008152; GO:0016787
HmN_000537700	Aminoacyl tRNA synthase complex interacting	0.876687	3444.82	1875.19	1.72012e-31	GO:0000049; GO:0016020; GO:0016021
HmN_002002900	n/a	0.876384	962.283	524.96	1.21681e-14	GO:0003676
HmN_000434800	Mitochondrial intermediate peptidase	0.876223	1098.95	597.413	6.04655e-21	GO:0004222; GO:0006508; GO:0008233; GO:0008237; GO:0016787; GO:0046872; GO:0006627; GO:0005759
HmN_000891000	DNA replication complex GINS protein PSF1	0.873217	488.873	265.987	3.29622e-09	GO:0006260; GO:0000811
HmN_000524800	Regulator of G protein signaling 7	0.873089	3646.9	1988.81	3.38807e-26	GO:0004871; GO:0005834; GO:0007186; GO:0035556; GO:0008277
HmN_002135100	n/a	0.871372	579.31	315.53	1.23961e-10	GO:0046983; GO:0003700; GO:0006355; GO:0005634; GO:0005667; GO:0005737
HmN_000030100	Nucleolar protein 5	0.870059	1879.86	1030.14	2.51359e-15	n/a
HmN_000470900	Sentrin specific protease 1	0.869053	631.42	346.983	1.88569e-09	GO:0006508; GO:0008233; GO:0008234
HmN_000255100	Retinoblastoma binding protein 4	0.867874	5525.47	3026.21	2.83387e-35	GO:0005634; GO:0005515
HmN_000324600	Phosphoglycerate mutase	0.866725	473.813	258.297	5.56012e-09	n/a
HmN_000070000	Vacuolar protein sorting associated protein 33A	0.86652	2442.77	1340.55	9.92031e-32	GO:0005623; GO:0006904; GO:0016192
HmN_000814100	SET (Trithorax:polycomb) domain containing protein	0.865318	968.923	531.287	2.59834e-15	GO:0005515
HmN_000948500	Nucleic acid binding, OB fold, tRNA helicase type	0.86512	384.4	211.15	4.04626e-08	GO:0004386; GO:0008152
HmN_002031700	n/a	0.863751	3088.43	1698.52	3.10609e-25	GO:0016491; GO:0055114
HmN_000205200	Rhophilin 2	0.86318	1239.39	679.47	4.6849e-18	GO:0005515
HmN_000444700	Atp:adp antiporter	0.862795	13767.9	7566.79	1.50014e-26	GO:0006810; GO:0016020; GO:0016021
HmN_000751900	F box:WD repeat containing protein 9	0.862372	797.487	440.25	1.28883e-11	GO:0005515
HmN_000036800	Expressed protein	0.861666	586.48	321.76	5.84463e-10	n/a
HmN_000331900	Expressed protein	0.860777	4854.03	2673.78	1.91154e-39	n/a
HmN_000557200	Invadolysin (M08 family)	0.860179	950.603	520.667	3.99193e-11	GO:0004222; GO:0006508; GO:0007155; GO:0016020
HmN_000962400	Pre mRNA processing factor 39	0.859173	3975.95	2187.64	2.71857e-35	GO:0005622; GO:0005634; GO:0006396; GO:0006397; GO:0005515
HmN_000545500	Adenylate kinase isoenzyme 6 homolog	0.858944	1246.91	687.79	6.32282e-18	GO:0000166; GO:0004017; GO:0005524; GO:0005634; GO:0016301; GO:0016310; GO:0016740; GO:0016887; GO:0046939
HmN_000308100	n/a	0.8586	1034.54	571.453	9.86013e-18	GO:0005515
HmN_000301900	SWI:SNF related, matrix associated, actin	0.858524	2940.83	1618.16	1.64888e-24	GO:0043044; GO:0016514
HmN_002052200	n/a	0.857479	1972.8	1086.18	6.73628e-24	n/a
HmN_000631200	Ribosomal protein L9	0.856143	23466.6	12948.5	1.39986e-13	GO:0003735; GO:0005840; GO:0006412; GO:0019843
HmN_000013500	SPRY domain containing protein	0.854091	4836.97	2671.46	1.15948e-14	GO:0005737; GO:0005856; GO:0008092; GO:0019898; GO:0005515
HmN_000404700	WD repeat containing protein 61	0.854022	1674.99	926.183	2.12619e-23	GO:0016020; GO:0016021; GO:0005515
HmN_002198000	n/a	0.853603	1331.74	733.833	6.02158e-12	n/a
HmN_000595900	n/a	0.852628	1647.04	911.423	5.77542e-13	n/a
HmN_000722500	tRNA (Adenine N(1)) methyltransferase	0.851549	1100.52	610.127	5.88441e-17	GO:0008168; GO:0016740; GO:0030488; GO:0031515; GO:0032259
HmN_000515000	Mitogen activated protein kinase binding protein	0.851121	1325.37	731.087	4.78584e-17	GO:0016301; GO:0016310; GO:0005515
HmN_000512700	Expressed protein	0.851079	595.013	329.767	4.84057e-09	GO:0016020; GO:0016021
HmN_000455700	39S ribosomal protein L19	0.850565	704.76	392.237	3.17478e-09	GO:0003735; GO:0005622; GO:0005840; GO:0006412
HmN_000633300	T complex protein 1 subunit theta	0.85014	9942.15	5517.09	1.57333e-38	GO:0000166; GO:0005524; GO:0005737; GO:0006457; GO:0051082
HmN_000521000	n/a	0.849724	302.267	167.873	1.5391e-06	GO:0003677; GO:0003910; GO:0006281; GO:0006310; GO:0005524; GO:0003909; GO:0051103
HmN_000495500	Ribonucleoside diphosphate reductase subunit	0.849674	4177.51	2313.25	1.25244e-29	GO:0009186; GO:0016020; GO:0016021; GO:0016491; GO:0055114; GO:0009263
HmN_000409100	Survival of motor neuron protein interacting	0.848528	490.167	273.343	8.85981e-08	n/a
HmN_000371100	n/a	0.848094	1182.43	653.91	1.20057e-10	GO:0005515; GO:0004725; GO:0006470; GO:0016311; GO:0016791
HmN_000179700	U4:U6 small nuclear ribonucleoprotein Prp4	0.847368	1753.55	972.473	1.19945e-19	GO:0008380; GO:0019013; GO:0030529; GO:0005515
HmN_000635600	Alpha and gamma adaptin binding protein	0.846955	599.17	335.3	2.9553e-08	n/a
HmN_000603200	Chloride channel nucleotide sensitivea	0.84606	1604.12	890.037	1.69152e-07	n/a
HmN_000160800	DNA cross link repair 1A protein	0.844319	728.367	405.487	1.13821e-11	n/a
HmN_002259600	n/a	0.842128	510.147	284.3	2.00204e-08	n/a
HmN_000458500	Aspartyl tRNA synthetase, mitochondrial	0.841427	426.457	238.047	1.27412e-07	GO:0000166; GO:0004812; GO:0005524; GO:0005737; GO:0006412; GO:0006418; GO:0016874
HmN_000235400	Neuropilin (Nrp) and tolloid (Tll)	0.841346	634.84	355.48	1.80659e-12	GO:0016020; GO:0016021; GO:0005515
HmN_002208500	n/a	0.840854	1014.44	564.08	9.63626e-11	GO:0008168; GO:0008152
HmN_000977800	n/a	0.840015	484.957	269.913	7.47888e-11	GO:0004519; GO:0006281
HmN_000047400	Methyltransferase nsun4	0.838211	1385.09	775.33	2.87308e-14	GO:0008168; GO:0016740; GO:0032259
HmN_002150800	n/a	0.837722	3176.69	1778.33	7.10336e-35	GO:0006397
HmN_000817300	Protein spinster	0.836067	1518.73	847.407	6.52832e-19	GO:0016020; GO:0016021; GO:0055085
HmN_000591800	Pleiotropic regulator 1	0.835495	2545.33	1427.11	4.48016e-16	GO:0005515
HmN_000672100	Expressed protein	0.835164	1184.47	664.043	3.45768e-19	n/a
HmN_000744000	Chaperonin containing TCP1, subunit 2 (Beta)	0.834307	9535.35	5349.42	9.88009e-40	GO:0000166; GO:0005524; GO:0005737; GO:0006457; GO:0051082
HmN_002127400	Expressed conserved protein	0.834055	3546.23	1988.29	8.23336e-30	n/a
HmN_000707000	Aldo keto reductase family 1, member B4	0.832064	7020.1	3932.42	3.24087e-07	GO:0016491; GO:0055114
HmN_000692300	Lysine specific histone demethylase 1A	0.831128	2009.54	1132.5	5.50542e-18	GO:0008168; GO:0016491; GO:0032259; GO:0055114
HmN_000470400	D111 G patch	0.831122	611.9	342.07	1.32775e-09	GO:0003676
HmN_000475400	Magnesium transporter	0.830664	427.457	237.443	3.32448e-06	GO:0016020; GO:0016021
HmN_000217600	n/a	0.829682	2563.62	1436.66	2.57566e-12	n/a
HmN_000619500	n/a	0.829528	654.817	365.537	6.6533e-11	GO:0003723; GO:0003735; GO:0006412; GO:0005840
HmN_000143800	Tumor suppressor p53 binding protein 1	0.828261	922.123	519.057	7.77126e-10	n/a
HmN_002274500	n/a	0.827963	1127.76	634.733	1.83194e-20	GO:0005507; GO:0016531; GO:0006825; GO:0005758; GO:0003677; GO:0006260; GO:0006281; GO:0006310; GO:0005634; GO:0030170
HmN_000266600	Kelch protein 18	0.827482	461.487	257.237	2.16673e-07	GO:0005515
HmN_000022600	Histone deacetylase	0.826987	1074.19	605.503	3.28807e-13	GO:0004407; GO:0005634; GO:0006351; GO:0006355; GO:0016575; GO:0016787; GO:0032041; GO:0070932
HmN_000393000	Caspase 3, apoptosis cysteine peptidase	0.826473	2171.78	1222.67	1.14666e-21	GO:0004197; GO:0006508; GO:0006915; GO:0008233; GO:0008234; GO:0016787
HmN_000630900	SET and MYND domain containing protein 4	0.826336	5110.26	2878.09	4.5284e-14	GO:0005515
HmN_000355800	Hexaprenyldihydroxybenzoate methyltransferase	0.826049	829.473	470.017	4.20057e-08	GO:0006744; GO:0008168; GO:0008425; GO:0016740; GO:0032259
HmN_000761000	SWI:SNF chromatin binding protein	0.824571	7804.72	4403.56	4.27212e-17	n/a
HmN_000614100	Ras gtpase activating protein	0.82415	1261.34	711.407	1.78921e-09	GO:0007165; GO:0043087
HmN_000777900	Protein Mpv17	0.824054	805.733	455.04	1.41691e-12	GO:0016020; GO:0016021
HmN_000422400	U3 small nucleolar RNA associated protein 18	0.822269	779.643	437.147	2.27557e-08	GO:0005515
HmN_000219100	n/a	0.820877	808.997	457.72	2.28875e-15	n/a
HmN_000274100	Fanconi anemia group D2 protein	0.82064	534.88	301.81	8.13751e-10	GO:0006281
HmN_000021100	Poly(U) binding splicing factor PUF60	0.820262	452.347	254.327	2.24003e-08	GO:0000166; GO:0003676
HmN_000078300	YEATS domain containing protein	0.819671	736.58	416.603	1.32067e-11	GO:0006355
HmN_000515100	Adiponectin receptor	0.819529	1476.42	834.29	2.1038e-18	GO:0016020; GO:0016021
HmN_000599100	Cell adhesion molecule:down regulated by	0.818928	6153.26	3483.16	2.70493e-24	GO:0016020; GO:0016021; GO:0005515
HmN_000808700	N acetyltransferase	0.81872	1221.5	694.697	1.0037e-13	GO:0008080; GO:0008152; GO:0016740
HmN_000588100	Arf GAP and Pleckstrin domain containing protein	0.816696	806.717	458.277	5.50879e-13	GO:0005096; GO:0043547
HmN_000190700	Protein FAM116A	0.816036	761.21	431.017	2.00887e-10	GO:0017112
HmN_000287800	Ralbp1 associated eps domain containing protein	0.815206	422.307	239.317	3.2309e-08	GO:0005509; GO:0005515
HmN_000516900	Something about silencing protein 10	0.814388	655.473	371.51	1.27311e-09	n/a
HmN_000193700	Dolichyl pyrophosphate Glc1Man9GlcNAc2	0.813887	1084.92	619.13	1.11923e-11	GO:0005789; GO:0008152; GO:0016020; GO:0016021; GO:0016758
HmN_000200600	n/a	0.813176	1338.14	760.63	4.51219e-10	n/a
HmN_000152700	26S proteasome regulatory subunit N11	0.812466	4948.15	2820.27	2.91264e-21	GO:0000502; GO:0005515
HmN_000726900	Nucleolar protein nol1:nop2	0.811963	1083.25	617.153	8.26944e-15	GO:0003723; GO:0006364; GO:0008168; GO:0008757; GO:0032259
HmN_000296300	50S ribosomal protein L1	0.811347	828.973	471.01	1.85962e-14	GO:0005840
HmN_000290400	SWI:SNF complex subunit SMARCC2	0.809088	5018.1	2858.09	2.8446e-15	GO:0003677; GO:0005634; GO:0005515; GO:0043044; GO:0016514
HmN_000082800	DNA dependent protein kinase catalytic subunit	0.808875	1469.82	841.57	2.81511e-16	GO:0003677; GO:0004677; GO:0005524; GO:0005634; GO:0006303; GO:0006468; GO:0016301; GO:0016310; GO:0016773; GO:0005515; GO:0005488
HmN_000429800	Adenylyl cyclase-associated protein	0.80856	1817.9	1036.53	6.89073e-23	GO:0003779; GO:0007010; GO:0007015
HmN_000304200	Mortality factor 4 protein 1	0.808516	1299.49	741.483	4.42723e-13	GO:0005634; GO:0006355; GO:0006325
HmN_000732200	n/a	0.808347	907.853	516.783	8.50743e-10	n/a
HmN_000208200	Mariner Mos1 transposase	0.808116	635.893	362.053	4.29072e-10	GO:0016020; GO:0016021
HmN_000788800	Reticulon-like protein	0.807893	348.43	197.753	5.58853e-06	GO:0005783; GO:0005789; GO:0016020; GO:0016021; GO:0005515
HmN_002117300	n/a	0.807854	1843.39	1052.15	6.33818e-19	GO:0006887; GO:0000145
HmN_000001800	Dual specificity protein kinase Ttk	0.806122	1629.76	929.097	2.02491e-17	GO:0000166; GO:0004672; GO:0004712; GO:0005524; GO:0006468; GO:0007093; GO:0016301; GO:0016310; GO:0051304
HmN_000156100	CWF19 protein 1	0.805759	1029.42	588.443	5.0694e-15	GO:0003824; GO:0008152
HmN_002157400	n/a	0.805407	1240.38	709.013	7.04459e-15	n/a
HmN_000702500	Expressed protein	0.804003	3227.31	1851.84	1.19166e-20	GO:0000166; GO:0003676
HmN_000270400	RNA polymerase II associated factor 1	0.803617	1438.17	820.523	9.18414e-12	GO:0006368; GO:0016570; GO:0016593
HmN_000565700	Protein uxt	0.801654	341.093	195.683	5.17614e-07	n/a
HmN_002039300	n/a	0.801407	620.407	354.003	2.97994e-09	GO:0051259; GO:0001671; GO:0051087; GO:0097428
HmN_000063350	Genomic scaffold, pathogen_HYM_2_scaffold_5	0.801277	1076.37	619.907	1.11069e-13	GO:0008168; GO:0032259
HmN_000289200	Mannose 1 phosphate guanyltransferase beta	0.800496	3137.65	1802.06	5.305e-28	GO:0009058; GO:0016740; GO:0016779
HmN_000393200	Zinc finger (C2H2) and AT rich interactive domain containing protein	0.800413	1509.86	867.593	3.81736e-14	GO:0003677; GO:0006355; GO:0046872; GO:0003676
HmN_000063700	Structure specific endonuclease subunit SLX4	0.800195	659.947	377.423	8.72837e-07	GO:0004519; GO:0005634; GO:0006260; GO:0006281; GO:0017108; GO:0033557; GO:0090305; GO:0005515
HmN_000205000	60S ribosomal protein L17	0.800094	25136.3	14423.1	1.05337e-12	GO:0003735; GO:0005622; GO:0005840; GO:0006412; GO:0015934; GO:0030529
HmN_000123600	Zinc finger, C2H2 type	0.799756	820.637	473.697	1.17432e-08	GO:0003676; GO:0046872
HmN_000104300	n/a	0.799641	800.07	459.843	1.59702e-09	n/a
HmN_000616600	Dendritic cell protein	0.799394	4696.62	2696.4	2.5875e-32	GO:0005515
HmN_000151400	Rac guanyl nucleotide exchange factor	0.799065	2618.56	1503.59	7.95107e-20	n/a
HmN_000016900	Bicaudal d protein	0.797505	1985.59	1144.84	1.4016e-19	n/a
HmN_000469700	Coiled coil domain containing protein	0.797294	454.187	262.377	4.25606e-07	n/a
HmN_000415400	Cell division cycle protein 23	0.797224	1160.72	667.743	6.1285e-12	GO:0005680; GO:0030071; GO:0051301; GO:0005515
HmN_000279300	UBX	0.797073	1378.83	794.893	2.3138e-15	GO:0005515
HmN_000678700	Ankyrin	0.796765	957.26	551.313	9.23768e-13	GO:0005515
HmN_000557500	Zinc finger CCCH domain containing protein 10	0.796304	769.823	441.847	1.0725e-08	GO:0046872
HmN_000337100	Ubiquitin conjugating enzyme morgue	0.794807	456.703	261.54	1.70613e-07	GO:0005515
HmN_000186500	Partner of y14 and mago	0.794721	2854.5	1647.88	1.38622e-20	n/a
HmN_000560800	Zinc finger, C2H2 type	0.793956	1598.62	924.133	1.00573e-16	GO:0046872; GO:0003676
HmN_000186200	Fanconi anemia group J protein	0.793252	441.007	254.71	1.22283e-07	GO:0000166; GO:0003676; GO:0003677; GO:0004003; GO:0004386; GO:0005524; GO:0005634; GO:0006139; GO:0008026; GO:0016787; GO:0016818; GO:0032508
HmN_000609700	F box:lrr repeat protein	0.791204	394.94	227.393	1.81119e-07	GO:0005515
HmN_000219700	Synembryn A	0.790889	1404.63	810.963	3.8983e-14	n/a
HmN_000786700	Zinc finger, C2H2 type	0.790699	776.247	447.053	7.64288e-12	GO:0046872; GO:0003676
HmN_000648640	Anaphase promoting complex subunit 4	0.790546	851.99	492.36	7.07656e-07	GO:0005680; GO:0030071; GO:0031145; GO:0005515
HmN_000294600	n/a	0.790439	366.67	212.307	3.90249e-06	GO:0017183
HmN_002197900	n/a	0.790233	3337.27	1927.63	6.262e-23	GO:0051536; GO:0016226; GO:0005737
HmN_000604900	Daz interacting protein 1	0.788431	494.78	287.317	1.83075e-08	GO:0046872; GO:0003676
HmN_000721000	NADH dehydrogenase (Ubiquinone) iron sulfur	0.788216	4300.49	2488.48	5.74878e-32	GO:0008137; GO:0016491; GO:0016651; GO:0055114
HmN_000053400	Nuclear pore complex protein Nup133	0.786022	996.683	576.7	8.53001e-15	GO:0005515
HmN_000385200	n/a	0.785345	318.43	183.123	3.0455e-06	n/a
HmN_000451400	Dna methyltransferase 1 associated protein	0.784644	1148.43	664.88	1.51123e-13	GO:0005634; GO:0006281; GO:0006338; GO:0008168; GO:0016740; GO:0032259; GO:0035267; GO:0043967; GO:0043968; GO:0045892
HmN_002132600	n/a	0.784482	1699.93	986.583	1.78866e-21	GO:0004571; GO:0005509; GO:0016020
HmN_002197300	n/a	0.78407	905.987	524.773	6.99424e-09	n/a
HmN_000364500	Expressed protein	0.784013	5513.15	3197.67	4.58071e-29	n/a
HmN_000305800	Receptor protein serine/threonine kinase	0.78387	883.947	512.37	3.37085e-08	GO:0000166; GO:0004672; GO:0004674; GO:0004675; GO:0004702; GO:0005524; GO:0006468; GO:0007178; GO:0016020; GO:0016021; GO:0016301; GO:0016310; GO:0016740; GO:0023014
HmN_000811600	Nuclear transcription factor Y gamma	0.78384	1810.24	1050.33	4.11039e-19	GO:0003700; GO:0005634; GO:0006355; GO:0016602; GO:0046982
HmN_000330300	Nitrilase and fragile histidine triad fusion	0.783553	1843.56	1072.84	3.80292e-22	GO:0003824; GO:0006807; GO:0016810
HmN_000589200	Ankyrin repeat and socs box protein 13	0.783283	754.15	438.96	1.13204e-09	GO:0005622; GO:0035556; GO:0005515
HmN_000735100	SH3 domain binding protein 5	0.782065	1191.05	690.84	2.68387e-16	GO:0035556
HmN_001029100	n/a	0.781179	2783.95	1621.65	2.40287e-18	GO:0005509
HmN_000001000	GTP binding protein 10	0.780002	914.313	529.41	2.78456e-10	GO:0000166; GO:0003676; GO:0004386; GO:0005524; GO:0008152; GO:0016787
HmN_000451200	Lymphocyte antigen 75	0.779372	2130.03	1239.31	2.16967e-26	GO:0016020; GO:0016021
HmN_000860500	ATP binding cassette sub family G	0.779352	4274.11	2487.06	8.84544e-31	GO:0005515
HmN_000039100	Mediator of RNA polymerase II transcription	0.779058	1119.91	649.617	7.81908e-11	GO:0001104; GO:0006357; GO:0016592
HmN_000357200	Notchless 1	0.778955	1564.93	913.6	1.90152e-19	GO:0005634; GO:0016020; GO:0016021; GO:0042254; GO:0005515
HmN_000033200	Aspartate aminotransferase	0.778797	1798.7	1050.28	1.25119e-12	GO:0003824; GO:0004069; GO:0006520; GO:0008483; GO:0009058; GO:0016740; GO:0030170; GO:0080130
HmN_000661400	E1b 55 kDa associated protein	0.777988	6926.77	4040.62	1.8907e-21	GO:0005515
HmN_000503100	Ras GTPase activating protein binding protein 1	0.777787	4855.94	2834.47	8.09551e-27	GO:0005622; GO:0006810
HmN_000028200	Bromodomain adjacent to zinc finger domain	0.776209	2733.88	1598.61	4.6191e-20	GO:0003677; GO:0005634; GO:0008270; GO:0046872; GO:0005515
HmN_000655400	DNA ligase	0.776119	1205.16	702.307	3.36299e-17	GO:0000166; GO:0003677; GO:0003909; GO:0003910; GO:0005524; GO:0006260; GO:0006281; GO:0006310; GO:0006974; GO:0016874; GO:0051103; GO:0071897
HmN_000472800	AAR2	0.77544	664.033	387.017	1.88875e-10	n/a
HmN_002198500	n/a	0.775097	1738.62	1014.03	1.21476e-19	GO:0016857; GO:0006024; GO:0016021
HmN_000003200	n/a	0.77327	3231.15	1887.97	2.42917e-17	GO:0004129; GO:0005740
HmN_000372900	Dnaj protein subfamily b 1	0.773211	2157.18	1257.9	5.3969e-20	GO:0006457; GO:0051082
HmN_002145600	n/a	0.772577	927.76	545.24	2.65544e-13	GO:0005515
HmN_000648500	Lamino associated polypeptide 2 emerin	0.772178	2902.27	1701.95	1.10271e-15	GO:0016020; GO:0016021
HmN_000302100	Tuftelin interacting protein 11	0.772137	1119.92	652.117	6.3829e-11	GO:0003676; GO:0003677; GO:0005634; GO:0005681; GO:0006355; GO:0006397; GO:0008380
HmN_000931100	Adenylosuccinate synthetase	0.772102	23970.3	14029.9	6.55863e-18	GO:0000166; GO:0004019; GO:0005525; GO:0006164; GO:0016874; GO:0044208; GO:0046872
HmN_000884200	Ras gtpase	0.771864	405.613	237.26	1.47519e-06	GO:0000166; GO:0005525; GO:0005622; GO:0007264
HmN_000702000	C Jun amino terminal kinase interacting protein	0.77178	3551.24	2077.05	1.31265e-17	GO:0006810; GO:0006811; GO:0015078; GO:0015991; GO:0016020; GO:0016021; GO:0016301; GO:0016310; GO:0033177; GO:0033179
HmN_000098900	Expressed conserved protein	0.77104	665.933	389.253	1.36203e-10	GO:0003676
HmN_000210500	20S proteasome, regulatory subunit beta	0.771035	1697.8	992.647	1.8394e-12	GO:0000502; GO:0004175; GO:0004298; GO:0005839; GO:0051603; GO:0043161
HmN_000550500	CDP diacylglycerol glycerol 3 phosphate	0.770378	1261.26	740.263	4.07537e-18	GO:0003824; GO:0008654; GO:0016780; GO:0008444; GO:0032049
HmN_000159000	Tetraspanin	0.770352	692.13	405.86	1.53849e-11	GO:0016020; GO:0016021
HmN_000792900	Expressed protein	0.770301	1698.54	994.873	3.20691e-10	n/a
HmN_000092300	Cleavage and polyadenylation specificity factor	0.770284	8042.16	4713.51	1.2405e-31	GO:0003676; GO:0008121; GO:0008270; GO:0016020; GO:0016491; GO:0046872; GO:0051536; GO:0051537; GO:0055114; GO:1902600
HmN_000866600	SANT, DNA binding	0.769982	503.59	294.687	4.6065e-10	GO:0003677; GO:0005634
HmN_000383800	Protein CIP2A	0.769964	516.287	301.68	1.16931e-07	GO:0005488
HmN_000807700	DNA directed RNA polymerase III subunit RPC6	0.7693	507.86	295.623	5.6772e-08	GO:0003677; GO:0003899; GO:0006351; GO:0006383; GO:0005666
HmN_000433300	Paramyosin	0.769091	778.227	457.98	5.10896e-11	GO:0003677
HmN_000372400	Dynactin 5 p25	0.768712	654.403	385.44	7.10868e-09	n/a
HmN_000568600	RNA recognition motif, RNP 1	0.768598	3966.41	2325.06	5.54696e-23	GO:0000166; GO:0003676
HmN_000290500	Protin armadillo repeat	0.768504	411.107	240.06	2.21731e-07	n/a
HmN_000806200	DNA directed RNA polymerase III subunit	0.767813	698.83	411.887	3.64792e-11	GO:0000166; GO:0003824; GO:0003899; GO:0006351; GO:0044237
HmN_000464100	Expressed protein	0.767782	655.467	382.027	1.62351e-06	n/a
HmN_000861700	Nucleolar gtp binding protein	0.766583	590.897	347.09	8.69176e-08	GO:0005730
HmN_000617100	Expressed conserved protein	0.766507	4912.21	2883.65	3.55127e-12	n/a
HmN_000463200	n/a	0.765718	2442.82	1432.71	1.26673e-21	GO:0003723; GO:0000178
HmN_000000400	Serine:threonine protein phosphatase PGAM5	0.765677	799.137	468.647	6.91051e-11	n/a
HmN_000255200	Diacylglycerol kinase	0.76427	1672.86	982.91	1.43722e-07	GO:0000166; GO:0004143; GO:0005524; GO:0007205; GO:0016301; GO:0016310; GO:0016740; GO:0003951; GO:0008152; GO:0005515
HmN_000438900	Expressed protein	0.762073	2166.54	1273	6.28058e-06	GO:0016020; GO:0016021
HmN_000655800	G patch domain and ankyrin repeats containing	0.76137	462.403	272.237	3.03274e-06	GO:0003676
HmN_000010300	ADP ribosylation factor GTPase activating	0.761232	1694.26	997.573	2.5202e-18	GO:0005096; GO:0043547
HmN_000865000	Rootletin	0.760991	365.103	213.333	7.2871e-06	n/a
HmN_000745400	NADH dehydrogenase (Ubiquinone) 1 alpha	0.76041	4080.47	2408.17	1.84505e-13	GO:0003824; GO:0008152; GO:0050662
HmN_000931200	n/a	0.760392	1155.3	682.48	1.13744e-06	n/a
HmN_000889300	tRNA selenocysteine 1 associated protein 1	0.760018	1302.97	769.91	4.68857e-16	GO:0000166; GO:0003676
HmN_002273900	n/a	0.759988	474.687	281.977	6.91514e-06	GO:0005515
HmN_000541000	Protein tyrosine phosphatase type IVA 1	0.75974	4872.55	2879.7	1.29222e-22	GO:0006470; GO:0008138; GO:0016311; GO:0016791
HmN_000115500	Protein RIC1	0.759544	1552.93	914.973	7.89347e-15	GO:0005515
HmN_000627100	n/a	0.759255	6793.16	4010.7	3.15645e-21	GO:0005515
HmN_000283700	n/a	0.758697	917.45	539.323	1.89149e-10	GO:0008152; GO:0016020; GO:0016021; GO:0016787
HmN_000378900	Ribosome biogenesis protein bop1	0.758252	977.83	574.733	3.60178e-11	GO:0005634; GO:0005654; GO:0005730; GO:0006364; GO:0042254; GO:0005515
HmN_000061400	Proteasome subunit alpha type	0.757227	6319.17	3739.22	8.59511e-23	GO:0000502; GO:0004175; GO:0004298; GO:0005634; GO:0005737; GO:0005839; GO:0006508; GO:0006511; GO:0008233; GO:0016787; GO:0019773; GO:0051603; GO:0043161
HmN_000163000	Repressor of RNA polymerase III transcription	0.756868	1083.46	642.47	5.73645e-13	GO:0016480
HmN_000025700	n/a	0.756133	1536.66	909.59	3.23412e-07	n/a
HmN_000514500	Polybromo 1	0.753829	4221.22	2500.75	1.4706e-19	GO:0003682; GO:0005515; GO:0006338; GO:0016586
HmN_000368300	RNA (Guanine 9) methyltransferase	0.753415	1054.96	626.767	4.25773e-16	GO:0008168; GO:0016740; GO:0032259
HmN_000516500	Protocadherin 9	0.752817	821.233	486.817	4.12572e-08	GO:0005509; GO:0005886; GO:0007155; GO:0007156; GO:0016020; GO:0016021
HmN_000098200	DNA excision repair protein ERCC 6	0.75057	1112.29	658.577	2.52182e-13	GO:0008146; GO:0008152; GO:0015016; GO:0016787
HmN_000821300	Deoxyribonuclease ii	0.750537	872.633	519.52	1.07316e-11	GO:0004531; GO:0006259
HmN_000065000	Actin protein 8	0.750348	535.87	318.517	2.76714e-09	GO:0006338; GO:0031011
HmN_000015300	Pre mRNA processing factor 19	0.74949	5631.09	3352.59	2.13454e-25	GO:0004842; GO:0016567; GO:0005515
HmN_000201700	Growth arrest and DNA damage inducible	0.749126	586.287	349.293	3.40176e-08	GO:0005634; GO:0007049
HmN_000124900	Uracil phosphoribosyltransferase	0.748393	894.393	534.72	3.32182e-11	GO:0008152; GO:0016740; GO:0016757; GO:0009116
HmN_000125900	SH2 domain containing protein 7	0.745557	655.67	390.11	2.35564e-07	n/a
HmN_000042100	alpha-1,2-Mannosidase	0.74384	1166.7	697.9	3.62563e-08	GO:0004571; GO:0005509; GO:0008152; GO:0016020; GO:0016021; GO:0016787; GO:0016798
HmN_000845900	U5 small nuclear ribonucleoprotein 40 kDa	0.743707	1455.99	867.083	8.32221e-16	GO:0019013; GO:0030529; GO:0005515
HmN_000000800	U3 small nucleolar RNA-associated protein 11	0.742572	1648.79	986.34	9.40221e-15	GO:0005634; GO:0005730; GO:0006364; GO:0032040
HmN_000213700	n/a	0.742175	1791.39	1069.63	2.12652e-15	GO:0043248; GO:0005488
HmN_000643500	Zinc finger protein	0.742101	3174.53	1897.23	1.26195e-17	GO:0003676; GO:0046872
HmN_000899500	N ethylmaleimide sensitive factor attachment	0.741077	1388.95	832.177	9.07736e-13	GO:0005622; GO:0006886; GO:0005515
HmN_000629100	4 nitrophenylphosphatase	0.740874	2292.86	1372.62	5.14953e-10	GO:0008152; GO:0016311; GO:0016791
HmN_000605300	Mitochondrial import inner membrane translocase	0.739756	977.653	583.563	3.60503e-13	GO:0005743; GO:0005744; GO:0015031
HmN_000629200	ARF GTPase activating protein GIT2	0.739333	1424.39	855.25	6.46442e-07	GO:0005096; GO:0043547; GO:0005515
HmN_000747800	Multidrug and toxin extrusion protein	0.738142	3816.38	2283.85	9.16679e-11	GO:0006855; GO:0015238; GO:0015297; GO:0016020; GO:0016021; GO:0055085
HmN_002230200	n/a	0.737841	972.2	582.743	1.51805e-13	n/a
HmN_000428400	Mitochondrial GTPase 1	0.736919	467.8	282.683	9.86278e-07	GO:0005525
HmN_000485500	GDP fucose protein O fucosyltransferase 2	0.736878	999.023	596.513	4.07496e-12	GO:0008152; GO:0016740; GO:0016757
HmN_000875400	Histone deacetylase complex subunit sap18	0.736489	1864.68	1118.89	5.96992e-08	n/a
HmN_000405800	Tensin	0.734579	1877.58	1124.78	2.58144e-13	GO:0005515
HmN_000594200	Protein sarah	0.734025	853.713	512.317	6.50425e-11	GO:0005622; GO:0019722; GO:0003676
HmN_000970900	ATP dependent RNA helicase DDX46	0.73234	2471.75	1487.03	3.01649e-26	GO:0000166; GO:0003676; GO:0004386; GO:0005524; GO:0008152; GO:0016787
HmN_000634800	WD repeat containing protein 82	0.730582	2025.13	1218.57	6.84765e-15	GO:0005515
HmN_000389800	Serine:threonine protein kinase rio2	0.729893	623.04	377.82	8.27666e-06	GO:0004672; GO:0004674; GO:0005524; GO:0006468; GO:0016301; GO:0016310
HmN_000916700	Chromatin regulatory protein sir2	0.7297	1196.78	721.087	4.77701e-13	GO:0006476; GO:0008270; GO:0016811; GO:0051287; GO:0070403; GO:0017136
HmN_000461900	Cell division cycle protein 16	0.729009	1234.49	743.94	5.88499e-16	GO:0051301; GO:0005515
HmN_000662200	Afadin	0.729004	837.843	505.21	1.11486e-07	GO:0007165; GO:0005515; GO:0005911
HmN_000169300	Zinc finger and btb domain containing protein	0.728317	1378.62	828.857	1.21577e-12	GO:0003676; GO:0046872
HmN_000408300	Polycomb group RING finger protein 2	0.727325	449.163	270.047	1.84315e-06	GO:0008270; GO:0046872
HmN_000161300	n/a	0.727094	1090.12	658.32	1.49768e-13	GO:0004725; GO:0006470; GO:0016311; GO:0016791
HmN_000683100	Iojap protein	0.726846	585.69	350.6	1.96146e-06	n/a
HmN_000736400	Discoidin domain containing receptor 2	0.726708	2547.64	1536.13	4.45028e-22	GO:0016020; GO:0016021
HmN_000089800	Nucleolar complex protein 4	0.725692	730.927	440.817	1.36787e-10	GO:0042254
HmN_000635800	Innexin	0.725679	855.343	515.913	2.30195e-09	GO:0005886; GO:0005921; GO:0006810; GO:0006811; GO:0016020; GO:0016021; GO:0030054
HmN_000556700	RNA binding protein 5	0.725062	3735.87	2255.69	5.44916e-15	GO:0000166; GO:0003676; GO:0008270
HmN_002213700	n/a	0.724872	3771.96	2278.86	3.60449e-15	GO:0005515; GO:0000278; GO:0051301
HmN_002116800	n/a	0.724815	810.157	491.943	1.41612e-08	GO:0004177; GO:0030145
HmN_000710200	Glycoside hydrolase, chitinase domain containing protein 1	0.724589	1792.19	1087.53	2.55596e-13	GO:0004553; GO:0004568; GO:0005975; GO:0006032; GO:0016787; GO:0008061
HmN_000208100	Mariner Mos1 transposase	0.724385	3156.62	1912.43	1.26139e-20	GO:0004735; GO:0006561; GO:0055114
HmN_000125100	Tripeptidyl peptidase II (S08 family)	0.724145	3655.19	2214.2	1.36401e-15	n/a
HmN_000154200	Endoplasmic reticulum multispan transmembrane	0.723663	1064.8	641.35	1.44619e-09	GO:0000166; GO:0005319; GO:0005524; GO:0006869; GO:0016020; GO:0016021
HmN_000660100	Prolyl tRNA synthetase, mitochondrial	0.723561	746.907	452.353	1.77066e-07	GO:0000166; GO:0004812; GO:0004827; GO:0005524; GO:0005737; GO:0006418; GO:0006433
HmN_002117600	n/a	0.722572	498.797	303.753	3.70817e-07	GO:0006811; GO:0016021; GO:0005230; GO:0004888; GO:0005216; GO:0034220
HmN_000043300	Mitochondrial carnitine:acylcarnitine carrier	0.722566	2585.73	1568.78	1.4986e-19	GO:0006810; GO:0016020; GO:0016021
HmN_000269800	CREB binding protein	0.722211	3330.8	2020.16	2.37561e-14	GO:0003712; GO:0004402; GO:0005634; GO:0006355; GO:0008270; GO:0016573; GO:0005515
HmN_000625400	NADH dehydrogenase (Ubiquinone) flavoprotein 2	0.721967	1893.66	1149.46	2.56589e-18	GO:0016491; GO:0046872; GO:0051536; GO:0051537; GO:0055114
HmN_000444600	Atp:adp antiporter	0.720468	15250.1	9254.63	2.96813e-44	GO:0005215; GO:0005743; GO:0006810; GO:0016020; GO:0016021; GO:0055085; GO:0022857
HmN_000015100	Cyclic AMP dependent transcription factor ATF 6	0.720267	993.4	601.703	3.33385e-12	GO:0003700; GO:0006355; GO:0043565; GO:0003677
HmN_000131100	Retinoblastoma protein 1	0.719875	2955.9	1795.39	5.57731e-27	GO:0005634; GO:0006351; GO:0006357; GO:0007049; GO:0051726
HmN_000992300	28S ribosomal protein S14, mitochondrial	0.719779	1518.39	918.44	6.75359e-15	GO:0003735; GO:0005622; GO:0005840; GO:0006412
HmN_000472200	n/a	0.719628	4082.04	2472.75	1.94182e-07	GO:0004672; GO:0005524; GO:0006468
HmN_000815100	n/a	0.718624	717.1	434.633	3.99953e-08	n/a
HmN_000523200	Niemann Pick C1 protein	0.717979	1838.44	1118.06	3.60977e-14	GO:0005524; GO:0006139; GO:0007165; GO:0008158; GO:0016020; GO:0016021; GO:0016301; GO:0016310; GO:0016740; GO:0019205
HmN_002039200	n/a	0.717275	1405.87	853.293	2.32128e-17	GO:0005515
HmN_000029400	SFT2	0.717089	705.077	429.46	1.26992e-08	GO:0006810; GO:0016020; GO:0016021; GO:0016192
HmN_000392900	Cdk5 regulatory subunit associated protein 1	0.717066	887.27	539.043	1.67654e-11	GO:0003824; GO:0009451; GO:0016740; GO:0043412; GO:0051536; GO:0051539; GO:0006400; GO:0005737
HmN_000286200	Ankyrin	0.716916	494.157	301.913	1.61257e-07	GO:0005515
HmN_000681300	Proteasome subunit alpha type	0.716793	4252.26	2587.22	4.07285e-20	GO:0000502; GO:0004175; GO:0004298; GO:0005634; GO:0005737; GO:0005839; GO:0006508; GO:0006511; GO:0008233; GO:0016787; GO:0019773; GO:0051603
HmN_000714100	Protocadherin 11	0.716483	1692.52	1029.78	2.83385e-16	GO:0005509; GO:0005886; GO:0007155; GO:0007156; GO:0016020; GO:0016021
HmN_000242800	Nicastrin	0.716029	1386.52	841.49	1.85626e-12	GO:0016020; GO:0016021; GO:0016485
HmN_000558600	Expressed conserved protein	0.713917	1491.92	908.167	3.14414e-16	n/a
HmN_000482700	Expressed conserved protein	0.713683	777.677	473.217	2.01587e-09	n/a
HmN_002162300	n/a	0.713096	716.847	434.647	5.70048e-09	GO:0005515
HmN_000366000	Glutathione S transferase	0.713092	18265.1	11135.5	8.0624e-11	GO:0004364; GO:0008152; GO:0016740; GO:0005515
HmN_000848400	Protein VAC14	0.712704	645.703	394.72	2.61719e-07	GO:0043550; GO:0070772; GO:0006661; GO:0005488
HmN_000948600	n/a	0.712684	540.09	326.833	5.23751e-06	n/a
HmN_000365900	Glutathione S transferase mu 2	0.712612	2777.26	1692.01	1.93342e-13	GO:0004364; GO:0008152; GO:0016740; GO:0005515
HmN_000062000	Para hydroxybenzoate polyprenyltransferase	0.712314	837.017	508.543	1.13565e-10	GO:0004659; GO:0008152; GO:0016020; GO:0016021; GO:0016740; GO:0006744; GO:0016765
HmN_000578200	Monocarboxylate transporter	0.711117	1743.95	1062.12	1.00962e-09	GO:0016020; GO:0016021; GO:0055085
HmN_000310400	Expressed protein	0.709791	600.11	367.927	3.92827e-07	n/a
HmN_000068500	Arf GTPase activating protein	0.709511	2695.59	1649.39	1.54581e-25	GO:0005096; GO:0043547
HmN_000267300	Protein tyrosine phosphatase, active site	0.709191	1138.51	697.307	3.63152e-06	GO:0004725; GO:0016311; GO:0016791; GO:0035335
HmN_000599700	Mitotic checkpoint protein PRCC, C terminal	0.708606	660.867	406.65	4.34221e-06	n/a
HmN_002028900	n/a	0.708407	1523.04	931.383	1.20086e-18	n/a
HmN_000077300	Cationic amino acid transporter	0.706972	3128.65	1919.14	2.72923e-10	GO:0003333; GO:0015171; GO:0016020; GO:0016021; GO:0022857; GO:0055085
HmN_000617200	Coiled coil domain containing protein 137	0.706593	1801.78	1103.99	3.3805e-11	n/a
HmN_000518400	Ubiquitin conjugating enzyme E2 C	0.705646	1367.77	839.16	1.72913e-07	GO:0000166; GO:0005524; GO:0008152; GO:0016874
HmN_000537500	Ras gtp binding protein rho1	0.703815	3150.39	1932.46	2.6002e-13	GO:0000166; GO:0003924; GO:0005525; GO:0005622; GO:0006886; GO:0006913; GO:0007165; GO:0007264; GO:0008152; GO:0015031; GO:0016020
HmN_000172500	Calumenin	0.702981	2936.59	1801.93	9.0177e-23	GO:0005509; GO:0016020; GO:0016021
HmN_000410500	Expressed conserved protein	0.702059	591.71	362.69	1.23686e-07	n/a
HmN_000730800	Lupus la ribonucleoprotein, putative	0.702053	4400.79	2703.94	2.112e-14	GO:0000166; GO:0003676; GO:0003723; GO:0005634; GO:0006396; GO:0019013; GO:0030529
HmN_002099200	n/a	0.701854	774.357	475.613	2.20934e-07	GO:0047429; GO:0009143
HmN_000220900	Nucleolar complex protein 3	0.697991	878.157	540.583	1.45508e-10	GO:0005488
HmN_002218800	n/a	0.697577	2156.19	1330.08	4.80731e-10	n/a
HmN_000450200	Tyrosine-protein kinase	0.697543	1696.79	1044.77	3.90513e-11	GO:0000166; GO:0004672; GO:0004713; GO:0004715; GO:0005524; GO:0006468; GO:0016301; GO:0016310; GO:0016740; GO:0018108; GO:0005515
HmN_002089000	n/a	0.697141	1212.03	744.86	1.05584e-12	n/a
HmN_000703100	Pleckstrin y	0.697012	1260.81	778.303	4.43583e-09	n/a
HmN_000776700	UV radiation resistance associated gene protein	0.696552	632.463	388.403	5.94697e-08	n/a
HmN_000399300	Enhancer of polycomb-like protein	0.695621	4536.19	2802.47	2.42225e-24	GO:0005634; GO:0006351; GO:0006355; GO:0006357; GO:0032777; GO:0035267
HmN_000084800	NADH dehydrogenase (Ubiquinone) iron sulfur	0.69524	2917.29	1803	3.45631e-11	GO:0016651; GO:0022900
HmN_000928900	Exostosin 2	0.69511	1838.21	1136.82	2.99531e-10	GO:0006024; GO:0015012; GO:0015020; GO:0016021; GO:0016757; GO:0006486
HmN_000828500	Zinc finger protein	0.694849	808.303	498.267	7.68143e-07	GO:0003676; GO:0046872
HmN_000226500	Lon protease homolog	0.694753	2171.93	1339	2.81543e-18	GO:0000166; GO:0004176; GO:0004252; GO:0005524; GO:0006508; GO:0006515; GO:0008233; GO:0008236; GO:0016787; GO:0030163
HmN_000564100	Tropomyosin	0.694552	1711.33	1056.77	1.77401e-10	n/a
HmN_000476900	Splicing factor 3b subunit 3	0.694498	2056.26	1265.67	5.00668e-13	GO:0003676; GO:0005634; GO:0005515
HmN_000911200	LUC7	0.694229	2206.76	1363.2	2.15592e-17	GO:0003729; GO:0005685; GO:0006376
HmN_000064400	N acetyltransferase mak3	0.694037	1329.74	822.237	2.60768e-09	GO:0008080; GO:0008152; GO:0016740
HmN_000074500	MAP kinase activating death domain (DENN)	0.692265	825.637	509.753	1.38177e-10	GO:0016301; GO:0016310
HmN_000481800	ATP dependent RNA helicase DDX27	0.692147	1301.38	805.943	4.54985e-14	GO:0000166; GO:0003676; GO:0004386; GO:0005524; GO:0008152; GO:0016787
HmN_000306800	Proteasome subunit alpha type	0.691297	5743.87	3554.72	1.26608e-15	GO:0000502; GO:0004175; GO:0004298; GO:0005634; GO:0005737; GO:0005839; GO:0006508; GO:0006511; GO:0008233; GO:0016787; GO:0019773; GO:0051603
HmN_000718600	n/a	0.691177	729.33	453.27	2.02903e-08	GO:0000910; GO:0007088; GO:0051225
HmN_000980200	C2 domain containing protein 3	0.691138	921.04	570.95	5.35746e-07	n/a
HmN_000678200	n/a	0.69106	1296.35	801.483	3.77835e-10	GO:0046982
HmN_002190400	n/a	0.690897	358.267	222.557	1.16844e-06	n/a
HmN_000742500	Vacuolar protein sorting associated protein 8	0.690617	1642.39	1016.1	1.12796e-08	GO:0005515
HmN_000834200	Ndr	0.689017	1254.07	779.817	2.47037e-07	n/a
HmN_000515600	General transcription factor IIH, polypeptide 4	0.687065	585.387	363.623	4.41965e-07	GO:0000439; GO:0004003; GO:0005634; GO:0006289; GO:0032508
HmN_000220700	Kynureninase	0.687032	618.603	384.26	3.3685e-07	GO:0003824; GO:0005737; GO:0006569; GO:0009435; GO:0016740; GO:0016787; GO:0019363; GO:0019805; GO:0030170; GO:0030429; GO:0034354; GO:0043420; GO:0097053
HmN_000124300	DnaJ subfamily C 3	0.68676	2111.48	1310.52	4.44744e-19	GO:0005488
HmN_000242900	n/a	0.685927	1980.23	1232.8	8.25575e-10	GO:0004843; GO:0006511; GO:0005622; GO:0016579
HmN_000154500	Purple acid phosphatase	0.685341	752.373	464.603	3.18723e-06	GO:0003993; GO:0008152; GO:0016311; GO:0016787; GO:0046872; GO:0005515
HmN_000470700	ATP citrate synthase	0.685012	725.137	449.303	1.0782e-06	GO:0003824; GO:0005524; GO:0008152; GO:0046912
HmN_000766600	Squamous cell carcinoma antigen	0.684369	2179.12	1355.99	2.26843e-16	GO:0000166; GO:0003676; GO:0005622; GO:0006396; GO:0005515
HmN_000014700	PAB dependent poly(A) specific ribonuclease	0.683975	1894.8	1182.27	1.06465e-14	GO:0033588; GO:0005515; GO:0002098
HmN_000234800	Rab3	0.682948	1585.17	988.76	1.81523e-13	GO:0000166; GO:0003924; GO:0005525; GO:0005622; GO:0006886; GO:0006913; GO:0007165; GO:0007264; GO:0008152; GO:0015031; GO:0016020
HmN_000252400	n/a	0.682695	1208.44	753.17	5.76535e-14	GO:0004525; GO:0006396; GO:0005515; GO:0016891
HmN_000638900	26S proteasome regulatory subunit S3	0.682354	4563.19	2843.89	8.08529e-30	GO:0000502; GO:0030234; GO:0042176; GO:0050790; GO:0005515
HmN_000678350	n/a	0.682177	1749.34	1090.11	6.18815e-09	GO:0003735; GO:0006412; GO:0015935; GO:0005622; GO:0005840; GO:0016746; GO:0008152
HmN_000368400	Methyltransferase nsun5	0.681408	662.547	412.313	5.62655e-07	GO:0008168; GO:0016740; GO:0032259
HmN_000268800	Subfamily S1B unassigned peptidase (S01 family)	0.680516	5935.2	3698.41	6.68609e-19	GO:0008152; GO:0016616; GO:0051287; GO:0055114; GO:0005515
HmN_002271500	n/a	0.680037	2503.45	1562.35	4.09864e-15	GO:0005515
HmN_000828900	n/a	0.679393	438.443	272.007	3.48933e-07	GO:0008168
HmN_000056100	Eukaryotic translation initiation factor 2A	0.676775	2166.82	1354.78	9.26589e-15	GO:0003743; GO:0006412; GO:0006413; GO:0005515
HmN_000119900	Tata box binding protein	0.676635	927.513	581.13	1.12673e-12	GO:0003677; GO:0006352
HmN_000523800	EF HAND 1, calcium binding site	0.676462	2023.54	1268.56	2.27041e-16	n/a
HmN_000816650	SUN domain containing protein 1	0.676114	2362.58	1475.4	2.78102e-15	GO:0016020; GO:0016021
HmN_000338300	ADP ribose pyrophosphatase, mitochondrial	0.675222	1106.92	693.573	4.72691e-10	GO:0008152; GO:0016787
HmN_000467900	Expressed protein	0.674614	719.84	449.437	4.35967e-06	GO:0016020; GO:0016021
HmN_000794400	Hydroxyacylglutathione hydrolase	0.674447	3052.49	1914.09	3.06076e-10	GO:0004416; GO:0016787; GO:0019243
HmN_000810200	Arginine:serine rich coiled coil protein 2	0.674286	743.423	464.843	3.92681e-08	n/a
HmN_000190200	ADP ribosylation factor protein 8B	0.674218	1752.1	1095.04	6.2432e-12	GO:0000166; GO:0005525; GO:0005622; GO:0007264
HmN_000281400	Eukaryotic translation initiation factor 6	0.674063	4088.27	2559.29	5.45355e-18	GO:0003743; GO:0005634; GO:0005730; GO:0005737; GO:0006412; GO:0006413; GO:0042254; GO:0042256; GO:0042273; GO:0043022; GO:0043023
HmN_000186100	Cdk5 regulatory subunit associated protein 3	0.673089	1664.22	1042.1	8.77488e-14	n/a
HmN_000425500	Translocon associated protein gamma subunit	0.672938	3358.67	2104.23	9.79427e-09	GO:0005784; GO:0006613; GO:0016020; GO:0016021; GO:0030176; GO:0006614
HmN_000248900	n/a	0.670538	1853.9	1163.81	1.09363e-06	n/a
HmN_000674300	FeS cluster biogenesis	0.667873	1193.81	751.817	6.42284e-10	GO:0005198; GO:0016226; GO:0051536; GO:0097428
HmN_000702700	Ras protein Rab 39B	0.666351	1089.34	683.723	1.11412e-11	GO:0000166; GO:0003924; GO:0005525; GO:0005622; GO:0006886; GO:0006913; GO:0007165; GO:0007264; GO:0008152; GO:0015031; GO:0016020
HmN_000031400	Surface protein PspC	0.666134	2287.62	1438.91	3.6168e-20	n/a
HmN_000333300	Coproporphyrinogen III oxidase	0.665717	3061.07	1928.51	2.37277e-18	GO:0004109; GO:0006779; GO:0055114
HmN_000294500	n/a	0.665358	683.57	430.95	8.84214e-08	GO:0005507
HmN_000146200	Serine:arginine repetitive matrix protein 2	0.664973	1681.89	1057.27	1.1135e-11	n/a
HmN_000212800	Gag pol polyprotein	0.664806	611.27	385.413	1.05987e-07	GO:0000126; GO:0006352; GO:0006355; GO:0006384; GO:0008270; GO:0017025; GO:0070897; GO:0001026; GO:0006383
HmN_002014900	n/a	0.664265	784.023	492.603	5.02691e-09	GO:0005515
HmN_000606600	Nuclear rna export factor 1	0.664228	2538.69	1600.23	2.98944e-12	GO:0005634; GO:0051028; GO:0005515
HmN_000524900	ATP binding cassette sub family B	0.663406	1780.22	1123.84	6.87639e-17	GO:0000166; GO:0005524; GO:0006810; GO:0008152; GO:0016020; GO:0016021; GO:0016887; GO:0042626; GO:0055085
HmN_000542100	Transmembrane protein 50B	0.662799	1969.71	1245.92	2.93455e-10	GO:0016020; GO:0016021
HmN_000458800	RNA binding protein 34	0.662751	789.38	496.28	6.54892e-07	GO:0000166; GO:0003676; GO:0005515
HmN_000235500	Tho complex subunit 3	0.662159	705.853	444.67	3.26893e-06	GO:0005515
HmN_000421800	Protein prune	0.660978	634.383	401.377	6.84471e-07	GO:0005737; GO:0008152; GO:0016462
HmN_002026300	n/a	0.6587	1636.97	1033.83	2.64747e-09	n/a
HmN_000095800	n/a	0.658635	949.113	601.84	6.04497e-09	GO:0005737; GO:0005856; GO:0008092; GO:0019898
HmN_000400700	Nicalin	0.657846	3733.1	2367.18	3.4684e-19	GO:0006508; GO:0008237; GO:0005488
HmN_000230400	Magnesium transporter protein	0.657539	1500.24	952.543	6.98916e-10	GO:0016020; GO:0016021
HmN_000743500	n/a	0.656446	778.48	495.61	1.81769e-08	GO:0005216; GO:0006811; GO:0055085; GO:0016020; GO:0005245; GO:0072345; GO:0005765
HmN_000173100	MMP37 protein, mitochondrial	0.656439	1223.72	777.787	1.11769e-13	GO:0004605; GO:0032049
HmN_000379400	14-3-3 protein zeta:delta	0.656127	17887.2	11347.3	3.06796e-12	GO:0019904
HmN_000323600	Protein frg1	0.655815	1438.33	909.45	4.50071e-10	n/a
HmN_000824600	Metastasis suppressor protein 1	0.654227	2786.82	1766.88	1.87638e-16	GO:0003779; GO:0007009
HmN_000610100	mRNA cap guanine-N7 methyltransferase	0.653979	699.503	445.913	3.21326e-07	GO:0003723; GO:0004482; GO:0005634; GO:0006370; GO:0006397; GO:0008168; GO:0016740; GO:0032259; GO:0036265
HmN_000263500	Sodium:potassium dependent atpase beta subunit	0.653451	1993.46	1268.42	2.91511e-12	GO:0005890; GO:0006813; GO:0006814
HmN_000258100	Armadillo type fold	0.652718	1235.52	786.213	1.46871e-12	GO:0005622; GO:0006886; GO:0008536; GO:0005488
HmN_000025100	n/a	0.652052	3420.28	2175.11	1.25841e-21	GO:0005515; GO:0016853
HmN_000614900	Mitochondrial processing peptidase	0.651696	1709.68	1086.87	4.83913e-15	GO:0003824; GO:0004222; GO:0006508; GO:0046872
HmN_000169400	Transcriptional adapter 2 beta	0.651597	886.303	566.89	1.07641e-06	GO:0003677
HmN_002178700	n/a	0.650796	926.227	588.513	4.34445e-07	GO:0003677; GO:0006367; GO:0032968; GO:0005634
HmN_000787900	Variable lymphocyte receptor	0.647174	609.143	387.713	1.61987e-08	GO:0016020; GO:0016021; GO:0005515
HmN_000346800	Vacuolar protein sorting associated protein 13B	0.646751	3032.46	1934.58	8.51276e-13	GO:0005337; GO:0006810; GO:0016020; GO:0016021; GO:1901642
HmN_000000300	Nuclear protein localization protein 4	0.6462	3868.91	2475.16	6.86371e-20	GO:0008270; GO:0006511
HmN_000149600	n/a	0.645918	664.633	423.74	2.00771e-06	n/a
HmN_002225800	n/a	0.644303	2221.07	1419.41	6.28865e-14	n/a
HmN_002032600	n/a	0.644048	1007.99	645.323	1.81806e-10	GO:0005524; GO:0016021; GO:0016887; GO:0042626; GO:0055085
HmN_000105100	Tafazzin	0.643921	409.673	261.297	5.98803e-06	GO:0006644; GO:0008152; GO:0016746
HmN_000407300	Elongation factor 2	0.643919	63910.9	40888.9	5.43279e-27	GO:0000166; GO:0003746; GO:0003924; GO:0005525; GO:0006414
HmN_002185200	n/a	0.643537	1335.94	856.597	6.41803e-08	n/a
HmN_002038400	n/a	0.643075	2908.01	1858.02	1.60022e-15	GO:0005515
HmN_000211500	n/a	0.642955	388.653	248.743	8.00552e-06	GO:0005515
HmN_002128400	n/a	0.642133	1055.4	677.633	1.94302e-09	n/a
HmN_000744200	Cytochrome c oxidase subunit IV	0.641884	4975.11	3186.33	3.62425e-15	GO:0004129; GO:0016020; GO:0016021; GO:1902600
HmN_000236500	Protocadherin 11	0.641577	1832.97	1171.61	7.73355e-15	GO:0005509; GO:0005886; GO:0007155; GO:0007156; GO:0016020; GO:0016021
HmN_000362900	Pre mRNA splicing factor ISY1	0.641418	662.503	423.793	1.01505e-08	GO:0000350
HmN_000284600	ATP dependent RNA helicase DDX47	0.641188	687.29	437.733	2.10306e-07	GO:0003676; GO:0004386; GO:0005524; GO:0008152; GO:0016787
HmN_000291600	Zinc finger Ran-binding domain-containing protein 2	0.639722	1438.09	922.353	4.35943e-07	GO:0003723; GO:0005634; GO:0008270; GO:0046872
HmN_000012100	Traf and tnf receptor associated protein	0.639669	673.863	434.723	1.05778e-06	GO:0005515
HmN_000656600	SWI:SNF matrix associated	0.639307	2582.35	1657.51	9.10646e-14	GO:0005515
HmN_000442200	Expressed conserved protein	0.639254	1824.88	1174.22	7.6458e-09	GO:0016020; GO:0016021
HmN_002200300	n/a	0.639215	1362.77	871.603	2.53306e-11	GO:0055085; GO:0016021; GO:0005215
HmN_000584300	Tubulin alpha 1C chain	0.637418	50318.9	32329.3	7.74567e-14	GO:0000166; GO:0003924; GO:0005200; GO:0005525; GO:0005737; GO:0005856; GO:0005874; GO:0007017; GO:0008152
HmN_000582300	n/a	0.637344	1268.16	813.167	5.66042e-10	n/a
HmN_000480700	Thioredoxin fold	0.636839	1907.93	1228.45	2.28849e-08	GO:0005623; GO:0016020; GO:0016021; GO:0045454
HmN_000369100	ATP dependent RNA helicase DDX42	0.636473	1977.73	1270.89	5.78592e-14	GO:0000166; GO:0003676; GO:0004386; GO:0005524; GO:0008152; GO:0016787
HmN_000542300	Protease	0.63619	828.647	534.68	7.1349e-07	GO:0006508; GO:0008233
HmN_000293800	Rho guanine nucleotide exchange factor 7	0.635319	1738.77	1120.15	8.49213e-09	GO:0005089; GO:0035023; GO:0043547; GO:0005515
HmN_000171500	Target of rapamycin complex subunit lst8	0.634415	1180.38	757.813	2.18644e-10	GO:0005515; GO:0031929; GO:0032008; GO:0031931; GO:0031932
HmN_000771600	Protein disulfide isomerase TMX3	0.634003	1647.44	1063.45	5.5479e-14	GO:0005623; GO:0008152; GO:0016853; GO:0045454
HmN_000701700	RNA binding protein 18	0.633165	666.36	430.483	2.91657e-07	GO:0000166; GO:0003676
HmN_000376100	Replication factor c subunit 2	0.632575	1919.95	1240.46	4.97257e-13	GO:0003677; GO:0005524; GO:0006260
HmN_000076800	Growth factor receptor bound protein	0.632349	1481.42	954.917	2.06312e-15	GO:0005737; GO:0006886; GO:0007033; GO:0005515
HmN_000718400	Mevalonate galactokinase	0.632013	1075.82	695.193	1.32808e-07	GO:0000166; GO:0004496; GO:0005524; GO:0005737; GO:0008152; GO:0008299; GO:0016301; GO:0016310; GO:0016740; GO:0016773; GO:0005534
HmN_000868200	Pyruvate kinase	0.631104	1907.38	1231.37	1.89277e-10	GO:0000287; GO:0003824; GO:0004743; GO:0006096; GO:0016301; GO:0016310; GO:0016740; GO:0030955
HmN_000859700	Serine:threonine protein phosphatase 6	0.630537	2818.02	1816.8	9.96869e-07	GO:0000398; GO:0003676; GO:0003723; GO:0005634; GO:0005681; GO:0008270
HmN_000360200	General transcription factor 3C polypeptide 3	0.629901	527.43	341.227	3.92234e-07	GO:0005515
HmN_000369700	Acetyl coenzyme A C acetyltransferase	0.629734	539.357	350.073	3.19419e-07	GO:0008152; GO:0016740
HmN_000878700	OCIA domain containing protein 1	0.628755	1612.1	1044.98	2.48333e-13	GO:0016020; GO:0016021
HmN_000898000	Cak assembly factor	0.628744	511.383	328.843	6.16646e-07	GO:0005634; GO:0007049; GO:0061575; GO:0006289; GO:0045737; GO:0005675
HmN_000755600	n/a	0.628634	1086.19	701.283	6.58906e-11	n/a
HmN_000172000	RNA:RNP complex 1 interacting phosphatase	0.628284	1226.36	793.71	2.30926e-06	GO:0004725; GO:0006470; GO:0008138; GO:0016311; GO:0016787; GO:0016791; GO:0035335
HmN_000495200	Alanyl tRNA synthetase, cytoplasmic	0.627221	3030.86	1960.64	7.96763e-20	GO:0000166; GO:0003676; GO:0004812; GO:0004813; GO:0005524; GO:0005737; GO:0006419; GO:0016876; GO:0043039
HmN_000557300	Invadolysin (M08 family)	0.626375	1536.64	992.423	5.6879e-14	GO:0003824; GO:0008152; GO:0016740
HmN_000475300	WD repeat containing protein 53	0.625571	1882.47	1215.92	4.32278e-11	GO:0005515
HmN_000272100	GTP binding protein era	0.625125	1231.56	795.713	2.0538e-10	GO:0003723; GO:0005525
HmN_000648200	Ubiquitin domain containing protein 2	0.625115	707.833	456.823	1.69843e-07	GO:0005515; GO:0043130
HmN_000545300	Protocadherin 2 gamma c6 sCP1	0.624453	624.683	406.07	8.13585e-06	GO:0005509; GO:0005886; GO:0007155; GO:0007156; GO:0016020; GO:0016021
HmN_000858800	Serum response factor	0.624213	871.59	567.037	1.07205e-09	GO:0003677; GO:0005634; GO:0006351; GO:0006355; GO:0046983; GO:0000982; GO:0000987; GO:0045944
HmN_000656500	Cobalamin (Vitamin B12) biosynthesis CobW	0.624054	929.103	602.333	7.62009e-06	n/a
HmN_000805700	Mitogen-activated protein kinase	0.623855	5422.29	3516.83	7.20948e-13	GO:0000165; GO:0000166; GO:0004672; GO:0004674; GO:0004707; GO:0005524; GO:0005622; GO:0006468; GO:0016301; GO:0016310; GO:0016740
HmN_000808900	Cytochrome oxidase biogenesis protein	0.623391	1019.5	660.313	3.59325e-09	GO:0016020; GO:0016021; GO:0051205
HmN_000017000	Elongation factor Tu	0.623277	7024.53	4561.94	6.17234e-15	GO:0000166; GO:0003746; GO:0003924; GO:0005525; GO:0005622; GO:0006414
HmN_000080400	Translocon associated protein subunit beta	0.622606	4067.57	2635.75	1.06312e-06	GO:0005783; GO:0016020; GO:0016021
HmN_000291500	ER lumen protein-retaining receptor	0.621871	2054.66	1334.02	1.59391e-14	GO:0005783; GO:0005789; GO:0006621; GO:0006810; GO:0015031; GO:0016020; GO:0016021; GO:0046923
HmN_000016300	Histone lysine N methyltransferase MLL3	0.621513	3032.49	1970.83	1.71307e-13	GO:0008168; GO:0008270; GO:0016740; GO:0018024; GO:0032259; GO:0046872; GO:0051568
HmN_000341600	ATP binding cassette sub family B	0.621143	1259.95	821.487	1.75812e-10	GO:0000166; GO:0005524; GO:0006810; GO:0008152; GO:0016020; GO:0016021; GO:0016887; GO:0042626; GO:0055085
HmN_000883200	Zinc finger protein ZPR1	0.620826	1100.16	715.083	1.90974e-11	n/a
HmN_000625700	Dual specificity mitogen activated protein	0.620755	2292.12	1492.76	4.18744e-13	GO:0004672; GO:0005524; GO:0006468
HmN_000144700	Splicing factor 3A subunit 1	0.61967	2137.41	1389.62	1.7977e-16	GO:0003723; GO:0006396
HmN_000331400	ADP ribosylation factor binding protein GGA1	0.619377	1952.51	1273.02	1.32317e-10	GO:0005622; GO:0006886; GO:0016192; GO:0030131
HmN_000735800	Retinal dehydrogenase 1	0.619176	1837.01	1195.35	4.68771e-14	GO:0008152; GO:0016491; GO:0016620; GO:0055114
HmN_000808200	WD repeat containing, antisense to TP53	0.619139	1060.93	690.413	4.75208e-09	GO:0005515
HmN_000535100	Flotillin 2	0.618211	2569.09	1669.31	2.17228e-14	n/a
HmN_002029300	n/a	0.617351	1908.01	1239.56	6.37731e-11	GO:0005092; GO:0007264
HmN_000025000	ATP dependent RNA helicase DDX31	0.617056	6929.07	4514.36	3.82067e-13	GO:0000166; GO:0004386; GO:0005524; GO:0005737; GO:0016787; GO:0030163; GO:0036402
HmN_000203100	S-adenosylmethionine synthase	0.615388	8456.84	5515.45	9.66127e-20	GO:0000166; GO:0004478; GO:0005524; GO:0006556; GO:0006730; GO:0016740; GO:0046872
HmN_000538600	Ribosomal protein L19	0.615137	12258.9	8002.89	7.69681e-19	GO:0003735; GO:0005622; GO:0005840; GO:0006412; GO:0030529; GO:0022625
HmN_000948400	Serine threonine kinase receptor associated	0.6147	1520.04	991.683	1.06571e-09	GO:0016301; GO:0016310; GO:0005515
HmN_000678600	Centromere protein s	0.613877	778.203	510.17	8.1385e-09	GO:0046982; GO:0071821
HmN_000193500	Ww domain binding protein 4	0.611881	575.243	375.377	1.35145e-06	GO:0003676; GO:0005634; GO:0008270; GO:0046872; GO:0005515
HmN_000801100	Nuclear valosin containing protein	0.611123	1079.33	703.17	2.89878e-06	GO:0000166; GO:0005524
HmN_000321300	Dynein light chain	0.611018	1453.04	948.73	9.13015e-07	GO:0005875; GO:0007017; GO:0030286
HmN_000122100	Expressed protein	0.610937	1480.4	969.337	5.58128e-12	n/a
HmN_002184600	n/a	0.610638	707.887	462.687	1.07424e-07	GO:0005515; GO:0007034
HmN_000871600	Cyclin k	0.609966	1362.92	888.963	6.00598e-09	GO:0005634
HmN_000209600	Glutamyl-tRNA(Gln) amidotransferase subunit A, mitochondrial	0.609628	1021.17	670.163	1.48398e-10	GO:0000166; GO:0005524; GO:0005739; GO:0006412; GO:0016874; GO:0016884; GO:0030956; GO:0032543; GO:0050567; GO:0070681; GO:0004040
HmN_000055600	Valyl tRNA synthetase	0.608933	3203.04	2102.77	3.15724e-16	GO:0000166; GO:0002161; GO:0004812; GO:0004832; GO:0005524; GO:0006418; GO:0006438; GO:0006450; GO:0005737
HmN_000185300	Nuclear pore complex protein Nup160	0.608504	1450.54	952.47	4.58867e-13	GO:0005515
HmN_000516100	Dynamin 1	0.607926	1989.19	1305.9	1.37321e-10	GO:0000166; GO:0003924; GO:0005525; GO:0008152; GO:0072583
HmN_000040900	n/a	0.607462	530.857	346.877	3.84059e-06	GO:0005515
HmN_000151000	Stromal cell derived factor 2	0.607144	2086.17	1365.18	1.9067e-06	GO:0016020
HmN_000486100	Sporulation protein rmd5	0.605338	2554.81	1679.88	4.82589e-18	n/a
HmN_000259400	Expressed conserved protein	0.604631	799.42	525.227	8.40951e-08	n/a
HmN_000566000	Expressed protein	0.604519	1058.54	692.377	3.36406e-07	n/a
HmN_000175400	Eukaryotic translation initiation factor 3 subunit I	0.604122	4175.22	2743.95	1.15949e-09	GO:0001731; GO:0003743; GO:0005737; GO:0005852; GO:0006412; GO:0006413; GO:0006446; GO:0016282; GO:0033290; GO:0005515
HmN_000826800	Tetraspanin 74f	0.604083	689.433	451.003	1.50051e-07	GO:0016021
HmN_000530100	N2227	0.603913	1778.02	1172.75	1.83102e-08	n/a
HmN_000184100	Survival of motor neuron splicing factor	0.603697	1212.29	793.847	2.33524e-06	n/a
HmN_000101400	Negative elongation factor B	0.602168	1064.87	700.64	1.50527e-10	GO:0003746; GO:0005634; GO:0006414; GO:0045892
HmN_000354500	F box only protein 32	0.601948	664.31	438.467	6.99847e-08	GO:0005515
HmN_002019600	n/a	0.601197	3898.3	2568.31	5.54105e-11	GO:0055085; GO:0016021
[truncated: 3,355 more rows]

## Sheet: S2.3 DE Scolex-Neck cf. Mid
Additional file 2. Table S2.3. Differentially expressed gene models in the Scolex-Neck cf. Mid samples, with log2fold changes, transformed means, adjusted p-values and Gene Ontology hits (n/a = no annotation). GOI highlighted in grey.
Gene model	Description	log2fold change	mean Scolex-Neck	mean Mid	padj	Gene Ontology
HmN_002053200	n/a	10.6191	3015.01	1.42667	7.05657e-61	n/a
HmN_000274800	n/a	10.0893	428.707	0	1.34263e-19	GO:0016020; GO:0016021
HmN_000843800	Tetraspanin	9.8945	362.083	0	3.37932e-19	GO:0016020; GO:0016021
HmN_002041200	n/a	9.71441	1071.22	0.783333	5.79349e-32	n/a
HmN_000335400	n/a	9.40702	2144.98	2.66	3.02663e-70	n/a
HmN_002072400	n/a	8.9891	183.89	0	1.16001e-15	n/a
HmN_002095400	n/a	8.61154	10014.5	24.78	1.0648e-289	n/a
HmN_000960400	Diagnostic antigen gp50	8.57912	131.653	0	1.33043e-14	n/a
HmN_002046600	n/a	8.38804	415.117	1.03333	6.89734e-24	n/a
HmN_002067500	n/a	8.34936	114.257	0	2.4719e-13	n/a
HmN_000335200	n/a	8.24759	660.897	1.66	4.05278e-38	n/a
HmN_000335900	n/a	8.17796	4879.73	16.1233	5.21415e-241	n/a
HmN_000814700	n/a	8.06513	413.62	1.10333	9.41553e-27	GO:0016020; GO:0016021
HmN_002058000	n/a	8.04957	493.47	1.84333	7.93674e-34	n/a
HmN_000668200	Kunitz protease inhibitor	7.44155	161.843	0.553333	1.51341e-12	GO:0004867; GO:0006508; GO:0008233; GO:0010951
HmN_000896700	Peptidase inhibitor 16	7.25412	50.6267	0	6.22925e-10	GO:0005576
HmN_002271600	n/a	7.07966	45.79	0	4.33007e-09	n/a
HmN_000284900	Purine nucleoside phosphorylase	7.07741	1150.82	7.85667	2.99446e-104	GO:0003824; GO:0004731; GO:0006139; GO:0009116
HmN_002108100	n/a	6.43879	28.5833	0	2.09569e-07	n/a
HmN_002067600	n/a	6.2881	24.3133	0	1.55818e-07	n/a
HmN_000125600	Forkhead box Q:D protein transcription	6.1523	21.77	0	3.36784e-07	GO:0003677; GO:0003700; GO:0005634; GO:0006351; GO:0006355; GO:0043565
HmN_000336100	n/a	6.09668	21.83	0	1.00857e-06	n/a
HmN_000335800	n/a	6.04815	78.5467	0.906667	1.92848e-11	n/a
HmN_000019700	n/a	5.98994	19.9267	0	1.10193e-06	n/a
HmN_002054700	n/a	5.8414	226.423	3.73	7.9345e-34	n/a
HmN_000820600	n/a	5.8213	647.81	11.4933	6.1096e-57	n/a
HmN_002207800	n/a	5.79481	48.9133	0.583333	1.07949e-07	n/a
HmN_000335700	n/a	5.69039	93.5967	1.58667	1.62014e-14	n/a
HmN_000336000	n/a	5.65754	15.5	0	6.80631e-06	n/a
HmN_000842500	Tetraspanin	5.61848	15.38	0	7.93891e-06	GO:0016020; GO:0016021
HmN_000281800	Bestrophin	5.28644	712.393	17.7767	2.24767e-118	GO:0016020; GO:0016021
HmN_000560700	n/a	5.01309	27.7733	0.583333	7.55241e-06	GO:0003677; GO:0046983; GO:0006357
HmN_000094500	n/a	4.92912	43.9	1.10333	1.45893e-09	GO:0046983
HmN_000772500	Deformed	4.73151	1424.3	53.0767	2.27535e-77	GO:0003677; GO:0003700; GO:0005634; GO:0006355; GO:0007275; GO:0043565
HmN_002174300	n/a	4.39988	94.3133	3.76	8.77847e-09	n/a
HmN_000348300	Oxalate:formate antiporter	4.3942	746.83	35.5433	2.04206e-60	GO:0016020; GO:0016021; GO:0055085
HmN_000895800	n/a	4.27834	3226.07	155.903	3.65532e-16	n/a
HmN_000005700	n/a	4.24979	91.4267	4.51	1.86185e-18	GO:0004866; GO:0005615
HmN_000074300	POU domain protein	4.23218	43.8	1.88667	2.80678e-09	GO:0003677; GO:0003700; GO:0005634; GO:0006351; GO:0006355; GO:0043565
HmN_000644000	PBX/knotted	4.22626	46.81	2.49	3.972e-09	GO:0003677; GO:0005634; GO:0006355
HmN_000042400	Homeobox protein prospero	4.18109	127.353	6.97	7.50196e-26	GO:0003677
HmN_000128800	Taenia soluim Excretory and Secretory Product(TSES)38 protein	4.16673	182.31	9.23	2.90736e-17	n/a
HmN_000111200	n/a	4.05775	455.603	27.1967	1.29597e-44	n/a
HmN_002083800	n/a	4.02832	96.5467	5.20333	2.4369e-13	n/a
HmN_002192400	n/a	4.02537	40.2167	2.33333	3.69644e-08	n/a
HmN_000269200	Diagnostic antigen gp50	4.008	6101.11	376.573	1.65662e-144	n/a
HmN_002037800	n/a	3.91318	187.953	12.17	1.34713e-28	n/a
HmN_000895900	Expressed protein	3.86192	5313.89	361.477	1.77328e-55	GO:0005576
HmN_000951200	Glioma pathogenesis protein 1	3.7051	3022.84	219.353	6.18119e-13	n/a
HmN_000680200	Leucine rich repeat containing protein 15	3.67984	3987.13	309.49	8.3093e-217	GO:0016020; GO:0016021; GO:0005515
HmN_000205500	Glycerol kinase	3.67426	1079.78	75.1967	1.01635e-06	GO:0005975; GO:0016301; GO:0016310; GO:0016740; GO:0016773
HmN_002040800	n/a	3.6586	131.61	9.92333	4.73081e-16	n/a
HmN_002098000	n/a	3.648	2815.96	222.693	3.49358e-162	n/a
HmN_000638300	Empty spiracles	3.58288	96.69	7.41	7.29418e-13	GO:0003677; GO:0005634; GO:0006355; GO:0043565
HmN_000785600	Glioma pathogenesis protein 1	3.56016	663.463	54.5033	2.01013e-25	n/a
HmN_000534400	n/a	3.53005	30.6233	2.4	1.88197e-07	n/a
HmN_000630200	Lipopolysaccharide induced transcription factor	3.44219	638.66	57.6867	1.80855e-34	n/a
HmN_000747700	POU domain protein	3.40059	58.1167	5.25	3.54106e-10	GO:0003677; GO:0003700; GO:0005634; GO:0006351; GO:0006355; GO:0043565
HmN_002197400	n/a	3.36852	42.3233	3.54667	1.60608e-07	GO:0003677; GO:0003700; GO:0006355
HmN_000385600	Mesenchyme homeobox	3.29991	183.923	17.3967	2.14351e-07	GO:0003677; GO:0005634
HmN_002081500	n/a	3.27988	89.24	9.22667	1.48811e-12	n/a
HmN_002132000	n/a	3.20668	2122.75	228.163	6.94481e-83	n/a
HmN_000804500	Tapeworm specific antigen B	3.19329	3426.56	358.01	3.62158e-10	n/a
HmN_000720100	Alkaline phosphatase	3.17913	319.64	34.3967	1.50522e-40	GO:0003824; GO:0004035; GO:0008152; GO:0016311; GO:0016787; GO:0016791
HmN_000553800	Transcription factor sum	3.15575	909.2	102.45	5.872e-101	GO:0003677; GO:0005634; GO:0006355; GO:0007517; GO:0046983
HmN_000877800	n/a	3.1556	1312.47	146.1	1.15883e-116	n/a
HmN_000389600	Protocadherin 1	3.15329	309.717	33.5833	9.15933e-25	GO:0005509; GO:0005886; GO:0007155; GO:0007156; GO:0016020; GO:0016021
HmN_002046700	n/a	3.13825	77.6733	8.56333	1.03407e-11	n/a
HmN_000108700	Zinc finger protein	3.13039	93.3733	10.6533	2.22551e-10	GO:0003676; GO:0046872
HmN_000845400	Orthopedia	3.08919	89.34	9.87	1.15472e-12	GO:0003677; GO:0005634; GO:0006355; GO:0043565
HmN_000160000	n/a	3.08168	2698.8	316.263	5.7215e-111	GO:0015144; GO:0034219; GO:0016021
HmN_002243800	n/a	3.06546	96.4467	11.1767	3.16172e-10	n/a
HmN_000639400	Delta-like protein	3.06159	772.583	91.51	7.53716e-67	GO:0005509; GO:0007154; GO:0007275; GO:0016020; GO:0016021; GO:0005515
HmN_000544000	n/a	3.0283	57.6233	6.43333	8.67294e-08	n/a
HmN_000591600	n/a	3.01499	419.46	51.4467	2.60687e-57	GO:0005509; GO:0007156; GO:0016020; GO:0007155; GO:0005886
HmN_000600500	Tetraspanin	2.97778	1207.45	144.027	1.65475e-06	GO:0016020; GO:0016021
HmN_000753500	Protocadherin 11	2.94526	528.9	68.4	5.17249e-58	GO:0005509; GO:0005886; GO:0007155; GO:0007156; GO:0016020; GO:0016021
HmN_002108200	n/a	2.9065	39.3533	5.18333	2.75384e-07	n/a
HmN_000907100	Protein tiptop	2.89013	1949.77	261.64	3.11722e-109	GO:0010468; GO:0046872; GO:0003676; GO:0000122; GO:0048730; GO:0048749
HmN_000220700	Kynureninase	2.83412	1683.04	234.863	1.08901e-85	GO:0003824; GO:0005737; GO:0006569; GO:0009435; GO:0016740; GO:0016787; GO:0019363; GO:0019805; GO:0030170; GO:0030429; GO:0034354; GO:0043420; GO:0097053
HmN_000110100	n/a	2.82957	89.4933	11.8533	2.22193e-10	GO:0003700; GO:0043565; GO:0006355
HmN_000055800	n/a	2.7992	132.787	18.7533	5.48177e-21	n/a
HmN_000164700	Protocadherin 11	2.79679	90.52	12.2433	6.51742e-08	GO:0005509; GO:0005886; GO:0007155; GO:0007156; GO:0016020; GO:0016021
HmN_000752300	Peptide G protein-coupled receptor	2.79068	67.29	9.37	4.00947e-10	GO:0004930; GO:0007186; GO:0016020; GO:0016021
HmN_002114900	n/a	2.77693	162.647	23.7233	1.76491e-17	GO:0055085; GO:0016021
HmN_000529000	High affinity choline transporter 1	2.768	158.72	22.3367	4.09506e-14	GO:0005215; GO:0006810; GO:0016020; GO:0016021; GO:0055085; GO:0022857
HmN_000259500	Caspase 8	2.73706	166.953	24.1033	3.18426e-13	GO:0004197; GO:0006508; GO:0006915; GO:0008234; GO:0005515
HmN_000790000	Protein lozenge	2.68707	240.077	36.25	3.16461e-18	GO:0003677; GO:0003700; GO:0005524; GO:0005634; GO:0006355
HmN_000768600	Protocadherin alpha 4 unspliced	2.67442	50.17	7.71667	3.06223e-09	GO:0005509; GO:0005886; GO:0007155; GO:0007156; GO:0016020; GO:0016021
HmN_000103200	Acyl coenzyme A binding protein	2.6743	3473.16	531.237	4.61599e-11	GO:0000062
HmN_000591900	Aromatic amino acid decarboxylase	2.67	308.033	47.5067	1.14338e-38	GO:0003824; GO:0006520; GO:0016829; GO:0016831; GO:0019752; GO:0030170
HmN_002036800	n/a	2.6318	59.9833	9.12	2.42821e-07	n/a
HmN_000452300	Kelch repeat type 1	2.62849	3391.2	547.17	7.35854e-179	GO:0016567; GO:0031463; GO:0005515
HmN_000396300	Diagnostic antigen gp50	2.59377	19681.3	3245.19	6.86783e-47	n/a
HmN_000690800	Protocadherin 11	2.58515	70.37	11.2267	1.87706e-10	GO:0005509; GO:0005886; GO:0007155; GO:0007156; GO:0016020; GO:0016021
HmN_000691100	n/a	2.5655	585.773	98.2133	1.14542e-30	n/a
HmN_000734300	Growth factor independence	2.54034	68.1067	11.1033	3.83463e-09	GO:0003676; GO:0046872; GO:0006355
HmN_000602600	n/a	2.53468	40.3033	6.61333	3.96068e-06	n/a
HmN_000164300	von Willebrand factor A domain containing protein	2.52711	102.747	17.15	3.76006e-11	n/a
HmN_000220500	n/a	2.50841	463.723	81.9367	3.22198e-43	n/a
HmN_000659500	Calcium:calmodulin dependent 3',5' cyclic	2.50814	189.503	33.4133	5.4452e-22	GO:0004114; GO:0007165; GO:0008081; GO:0008152; GO:0016787; GO:0046872
HmN_000521400	p53 transcription factor, DNA binding	2.4954	518.68	90.6	4.34708e-46	GO:0003677; GO:0003700; GO:0005634; GO:0006355; GO:0006915
HmN_000334100	Peptide G protein-coupled receptor	2.48871	330.637	58.5267	4.70377e-30	GO:0004871; GO:0004930; GO:0004983; GO:0007165; GO:0007186; GO:0007218; GO:0016020; GO:0016021
HmN_000175500	BC026374 protein (S09 family)	2.48731	382.183	67.1167	3.07858e-37	GO:0004104; GO:0008152
HmN_000906000	Tyrosine protein kinase Src42A	2.47476	359.673	64.38	8.55945e-35	GO:0016301; GO:0016310; GO:0005515
HmN_000976500	Diagnostic antigen gp50	2.4349	1879.87	346.307	4.21542e-101	n/a
HmN_000080700	Cathepsin L cysteine proteinase	2.43363	723.383	132.487	1.61512e-62	GO:0006508; GO:0008233; GO:0008234; GO:0016787
HmN_002066600	n/a	2.42312	102.283	18.2533	7.26976e-10	n/a
HmN_000785500	Peptidase inhibitor 16	2.41644	3057.44	555.21	8.03807e-07	n/a
HmN_002092400	n/a	2.40329	83.21	15.38	1.16374e-12	n/a
HmN_000165500	Expressed conserved protein	2.35	52.3467	9.82667	8.59715e-06	n/a
HmN_000149000	n/a	2.34852	1008.4	198.153	2.18846e-85	n/a
HmN_002226500	n/a	2.32477	982.287	195.21	9.52192e-109	GO:0007186; GO:0019236
HmN_000776500	Cys loop ligand gated ion channel subunit	2.31394	245.177	49.3967	2.80861e-22	GO:0005230; GO:0005886; GO:0006810; GO:0006811; GO:0016020; GO:0016021; GO:0030054; GO:0034220; GO:0045202; GO:0004888; GO:0005216
HmN_000302300	Protocadherin alpha 6	2.29832	354.59	71.5067	2.28949e-27	GO:0005509; GO:0005886; GO:0007155; GO:0007156; GO:0016020; GO:0016021
HmN_000137200	Nuclear factor interleukin-3-regulated protein isoform 2	2.29619	1534.61	311.923	2.84235e-85	GO:0003700; GO:0006355; GO:0043565
HmN_000416600	n/a	2.28948	149.683	30.05	6.0108e-15	GO:0005515
HmN_000064800	Complement C1q tumor necrosis factor	2.27917	152.07	30.2933	4.59985e-11	GO:0005515
HmN_000543900	n/a	2.27529	135.78	27.4267	2.38644e-14	n/a
HmN_000849500	E3 ubiquitin protein ligase TRIM9	2.27369	456.823	94.4767	1.36005e-42	GO:0005622; GO:0008152; GO:0008270; GO:0016874; GO:0046872; GO:0005515
HmN_000106800	Ecotropic virus integration site 1 protein	2.26836	69.0333	14.14	2.06438e-08	GO:0003676; GO:0006355; GO:0046872
HmN_000670200	Centrosomal protein of 135 kDa	2.26692	814.63	167.973	4.59291e-60	GO:0007099; GO:0010457
HmN_000449500	Expressed protein	2.26214	4102.22	851.977	1.55578e-57	n/a
HmN_002098300	n/a	2.25498	597.197	124.39	1.08592e-30	n/a
HmN_000735000	Mitogen activated protein kinase kinase kinase	2.25494	599.01	125.13	1.94024e-46	GO:0000166; GO:0004672; GO:0005524; GO:0006468; GO:0008270; GO:0016301; GO:0016310
HmN_000305100	Membrane associated guanylate kinase, WW and PDZ	2.24641	127.323	26.16	2.28745e-14	GO:0016301; GO:0016310; GO:0005515
HmN_000115900	Expressed conserved protein	2.24446	7278.66	1532.28	9.44592e-86	n/a
HmN_000358100	Cadherin	2.23719	455.297	95.6133	2.80664e-27	GO:0005509; GO:0005886; GO:0007155; GO:0007156; GO:0016020; GO:0016021
HmN_000866200	n/a	2.21586	193.65	41.16	1.07328e-21	GO:0005509; GO:0007156; GO:0016020; GO:0007155; GO:0005886
HmN_000319200	Expressed conserved protein	2.21001	616.92	131.313	9.30827e-10	n/a
HmN_000845800	n/a	2.2083	59.3333	12.7433	6.66803e-07	n/a
HmN_000029000	n/a	2.19981	112.35	24.0033	1.64617e-12	n/a
HmN_000789900	Protein lozenge	2.19836	182.07	39.35	1.20214e-21	GO:0003677; GO:0003700; GO:0005524; GO:0005634; GO:0006355
HmN_000722100	n/a	2.19728	66.0233	14.4467	6.70401e-07	GO:0016020; GO:0016021
HmN_000773100	Glycosyltransferase protein LARGE2	2.19637	78.5667	16.8733	3.74439e-09	GO:0008152; GO:0016740; GO:0016757
HmN_000204000	Tgf beta family	2.19621	645.84	141.203	5.63087e-57	GO:0005576; GO:0008083
HmN_002143800	n/a	2.18315	65.8033	14.2067	7.219e-09	n/a
HmN_000095900	n/a	2.17744	397.153	87.48	6.54574e-44	GO:0008152; GO:0016740; GO:0016746
HmN_000638400	Coiled coil domain containing protein C6orf97	2.17012	122.097	26.54	1.23492e-13	n/a
HmN_000278900	n/a	2.1574	123.777	27.5033	1.97054e-09	n/a
HmN_000661900	Bone morphogenetic protein 2	2.15367	86.89	19.23	6.02854e-08	GO:0005576; GO:0008083
HmN_000146600	Ewsr:fli fusion protein type	2.15273	47.8667	10.45	1.70882e-06	GO:0003677; GO:0003700; GO:0005634; GO:0006355; GO:0043565
HmN_000987100	n/a	2.15063	102.033	22.26	3.76418e-09	GO:0016020; GO:0016021; GO:0006811
HmN_002002700	n/a	2.14717	410.323	91.9233	1.11296e-38	GO:0008270; GO:0006355; GO:0003700; GO:0043565; GO:0005634
HmN_002097300	n/a	2.13924	335.457	75.39	2.73232e-29	GO:0019079
HmN_000150700	n/a	2.1344	194.37	43.7867	8.20484e-15	GO:0051260
HmN_000187500	Abdominal B	2.13008	1027.28	233.303	1.53167e-53	GO:0003677; GO:0005634; GO:0006355; GO:0043565
HmN_000301400	Arf1 5:ArfA family small GTPase	2.12499	107.683	24.0733	1.40216e-08	GO:0000166; GO:0005525; GO:0005622; GO:0005794; GO:0006810; GO:0007264; GO:0015031
HmN_000319700	Frizzled	2.12487	3005.7	686.547	6.17861e-86	GO:0004888; GO:0007166; GO:0007275; GO:0016020; GO:0016021; GO:0016055; GO:0042813; GO:0005515
HmN_000497800	n/a	2.12371	179.597	40.9967	2.19548e-17	n/a
HmN_000449800	n/a	2.12239	840.553	193.423	7.01252e-51	n/a
HmN_000451700	Lipoma HMGIC fusion partner	2.12036	441.993	101.287	4.70486e-31	GO:0016020; GO:0016021
HmN_000631300	Zinc finger, C2H2 type	2.11215	308.567	70.89	6.16395e-24	GO:0046872; GO:0003676
HmN_000715300	n/a	2.11067	305.753	70.43	2.19158e-26	n/a
HmN_000371800	Expressed protein	2.11001	976.44	224.4	1.01639e-15	GO:0016020; GO:0016021
HmN_000658800	Peptidase M, neutral zinc metallopeptidases, zinc binding site	2.1056	6133.7	1422.45	9.63684e-67	GO:0006629; GO:0016020; GO:0016021
HmN_000067500	Ras protein family 0B	2.10324	187.753	42.86	3.84014e-08	GO:0000166; GO:0005525; GO:0005622; GO:0007165; GO:0007264; GO:0016020; GO:0003924
HmN_000127800	n/a	2.09969	235.897	54.1933	1.38046e-16	n/a
HmN_000158100	n/a	2.09313	194.67	44.4233	2.58694e-11	n/a
HmN_002006200	n/a	2.0887	75.11	17.2633	2.15154e-08	GO:0005506; GO:0016705; GO:0020037; GO:0055114
HmN_000271200	n/a	2.08111	183.28	42.88	5.38682e-17	GO:0005328; GO:0006836; GO:0016021
HmN_000449300	n/a	2.07825	7514.55	1775.76	3.63044e-64	GO:0019079
HmN_000710500	MYB	2.07578	558.273	131.443	2.80946e-25	n/a
HmN_000851000	n/a	2.06818	1848.89	439.133	2.36558e-51	GO:0055085; GO:0016020; GO:0005215; GO:0006811
HmN_002151200	n/a	2.06653	5320.79	1268.99	1.24281e-206	n/a
HmN_000536700	Expressed conserved protein	2.06343	395.153	93.38	1.51636e-10	n/a
HmN_000416300	n/a	2.05962	520.52	125.513	5.56481e-36	GO:0003723; GO:0003724; GO:0016779; GO:0016888; GO:0042624; GO:0006260; GO:0018142
HmN_000596500	Transporter	2.0556	165.16	38.47	2.66293e-07	GO:0005328; GO:0006810; GO:0006836; GO:0015293; GO:0016020; GO:0016021; GO:0055085
HmN_000874900	Transcription factor SOX 14	2.05071	2620.69	632.037	2.76737e-157	n/a
HmN_000488100	Expressed conserved protein	2.04142	3633.31	879.23	1.05634e-25	n/a
HmN_002127900	n/a	2.03487	425.92	102.73	2.82809e-14	n/a
HmN_000354600	Gag pol polyprotein	2.03385	76.3733	18.1767	1.63846e-08	GO:0003676; GO:0015074
HmN_000377200	A disintegrin and metalloproteinase with	2.03338	425.453	102.317	2.87299e-17	GO:0004222; GO:0005578; GO:0006508; GO:0007229; GO:0008237; GO:0008270
HmN_000410700	Nicotinic acetylcholine receptor subunit type F	2.03312	600.11	145.84	3.44808e-49	GO:0005216; GO:0005230; GO:0005886; GO:0006810; GO:0006811; GO:0016020; GO:0016021; GO:0030054; GO:0034220; GO:0045202; GO:0045211; GO:0098655; GO:0004888; GO:0022848
HmN_000202700	EGF region	2.03115	186.2	44.7567	9.42215e-16	GO:0016020; GO:0016021
HmN_000480300	Peptide (Neuropeptide F/Y-like) G protein-coupled receptor	2.02696	302.863	73.1067	7.47053e-17	GO:0004871; GO:0004930; GO:0004983; GO:0007165; GO:0007186; GO:0007218; GO:0016020; GO:0016021
HmN_002093400	n/a	2.02413	633.973	155.693	9.9157e-54	GO:0005506; GO:0016705; GO:0020037; GO:0055114
HmN_000472300	n/a	2.01828	50.48	12.32	1.04122e-06	n/a
HmN_000075000	n/a	2.01708	98.6767	24.1933	6.94403e-12	GO:0005509
HmN_000449400	n/a	2.01049	1673.8	412.737	2.11516e-20	n/a
HmN_000488800	SAM domain containing protein	2.0008	236.3	58.79	2.33641e-20	GO:0005515
HmN_000617900	Dihydropyrimidinase 2	1.99309	1112.23	279.687	1.89298e-96	GO:0008152; GO:0016787; GO:0016810
HmN_000030200	Amine G protein-coupled receptor	1.98997	109.747	26.6433	1.05196e-06	GO:0004930; GO:0007186; GO:0016020; GO:0016021
HmN_000157000	n/a	1.98718	242.81	60.5833	2.06701e-20	GO:0004871; GO:0007186; GO:0005834
HmN_000143000	Innexin	1.98377	485.72	121.963	9.86137e-22	GO:0005921; GO:0006810; GO:0006811; GO:0016020; GO:0016021; GO:0030054
HmN_000221400	Orphan Rhodopsin-like G protein-coupled receptor	1.9784	124.12	31.5133	7.82525e-11	GO:0004930; GO:0007186; GO:0016020; GO:0016021
HmN_000597500	Protocadherin 1	1.97451	590.82	149.677	1.07647e-55	GO:0005509; GO:0005886; GO:0007155; GO:0007156; GO:0016020; GO:0016021
HmN_000382500	Protocadherin 9	1.97256	1094.04	276.647	4.57457e-40	GO:0005509; GO:0005886; GO:0007155; GO:0007156; GO:0016020; GO:0016021
HmN_000600600	Tetraspanin	1.96901	18677.1	4766.12	2.85708e-78	GO:0016020; GO:0016021
HmN_000730600	C4b binding protein beta chain	1.95682	680.63	174.36	2.57245e-38	n/a
HmN_000811500	Leucine rich repeat containing protein 48	1.94771	55.7467	14.2633	5.79915e-06	n/a
HmN_000433700	Zinc finger protein 84	1.93994	1308.75	339.797	4.95143e-75	GO:0003676; GO:0046872
HmN_000229400	n/a	1.93147	448.48	116.377	6.90054e-28	GO:0016020; GO:0016021
HmN_002103100	n/a	1.92983	107.433	27.6167	1.4142e-10	GO:0016021
HmN_000006400	n/a	1.92766	304.387	79.3167	1.25986e-18	GO:0016020; GO:0016021
HmN_000265800	n/a	1.92282	496.5	130.433	4.1513e-37	GO:0004672; GO:0005524; GO:0006468; GO:0004703; GO:0007165; GO:0004674
HmN_000126600	n/a	1.92259	300.147	78.9233	2.85388e-19	n/a
HmN_000405200	Protocadherin gamma a8	1.91771	350.883	92.0867	1.44834e-15	GO:0005509; GO:0005886; GO:0007155; GO:0007156; GO:0016020; GO:0016021
HmN_000733800	G:T mismatch specific thymine DNA glycosylase	1.91189	622.09	164.81	1.14181e-23	GO:0006281; GO:0016799; GO:0005515; GO:0019104
HmN_000393300	Neuronal acetylcholine receptor subunit alpha 4	1.90969	699.943	185.313	1.68864e-38	GO:0005216; GO:0005230; GO:0005886; GO:0006810; GO:0006811; GO:0016020; GO:0016021; GO:0030054; GO:0034220; GO:0045202; GO:0045211; GO:0098655; GO:0004888; GO:0022848
HmN_000004400	n/a	1.90394	97.5567	25.88	2.79354e-09	GO:0016849; GO:0009190; GO:0035556; GO:0004672; GO:0006468; GO:0005524
HmN_000494900	Transcription factor SOX 14	1.891	679.59	181.63	4.12132e-29	n/a
HmN_000991400	Cadherin, putative	1.88106	331.397	89.7233	1.22162e-24	GO:0005509; GO:0005886; GO:0007155; GO:0007156; GO:0016020; GO:0016021
HmN_000559800	n/a	1.88101	117.083	30.9233	1.66043e-06	n/a
HmN_000241200	NAChR subunit	1.87939	449.96	121.5	1.77102e-32	GO:0005216; GO:0005230; GO:0005886; GO:0006810; GO:0006811; GO:0016020; GO:0016021; GO:0030054; GO:0034220; GO:0045202; GO:0045211; GO:0098655; GO:0004888; GO:0022848
HmN_000238600	Glutamate receptor 2	1.87855	208.117	55.6267	1.02847e-15	GO:0004872; GO:0004970; GO:0005216; GO:0005234; GO:0005886; GO:0006810; GO:0006811; GO:0016020; GO:0016021; GO:0030054; GO:0034220; GO:0035235; GO:0045202; GO:0045211
HmN_000708300	Mohawk	1.87592	166.057	45.3567	2.75245e-10	GO:0003677; GO:0005634; GO:0006355; GO:0043565
HmN_000061000	Guanine nucleotide binding protein subunit	1.86846	195.227	52.1433	5.36893e-07	GO:0000166; GO:0003924; GO:0004871; GO:0005525; GO:0007165; GO:0007186; GO:0008152; GO:0019001; GO:0031683
HmN_000322900	Peptide G protein-coupled receptor	1.86845	62.17	16.9267	1.23102e-07	GO:0004930; GO:0007186; GO:0016020; GO:0016021
HmN_000371900	Expressed protein	1.86188	3541.37	971.487	1.60338e-37	GO:0016020; GO:0016021
HmN_000348800	n/a	1.8594	620.08	169.493	2.45648e-25	GO:0005515
HmN_000671600	n/a	1.85791	149.75	40.8	5.17115e-08	n/a
HmN_000322000	Tumor necrosis factor receptor superfamily member	1.85644	5213.07	1436.83	3.08678e-79	GO:0007165; GO:0016020; GO:0016021; GO:0005515
HmN_000096000	Vesicular acetylcholine transporter	1.85305	354.68	96.76	5.26378e-10	GO:0016020; GO:0016021; GO:0055085
HmN_000734800	Protocadherin 1	1.84903	672.25	184.75	4.90267e-13	GO:0005509; GO:0005886; GO:0007155; GO:0007156; GO:0016020; GO:0016021
HmN_000088300	Ankyrin repeat and MYND domain containing protein	1.83487	187.587	51.7533	8.03737e-13	GO:0046872; GO:0005515
HmN_000508200	Cathepsin L	1.8342	203.027	56.7367	5.50155e-13	GO:0006508; GO:0008234
HmN_000522400	Reversed polarity	1.82661	410.317	114.493	1.86651e-16	GO:0003677; GO:0005634; GO:0006355; GO:0043565
HmN_002200900	n/a	1.80622	153.93	43.8833	9.22846e-14	GO:0006820; GO:0016021; GO:0005452; GO:0016020
HmN_000578000	n/a	1.80162	444.49	126.803	6.104e-35	GO:0055085; GO:0016021
HmN_000593400	n/a	1.79887	486.353	139.45	4.91265e-23	n/a
HmN_000078200	Islet	1.79806	229.043	65.8867	2.46799e-18	GO:0003677; GO:0005634; GO:0006355; GO:0008270; GO:0043565; GO:0046872
HmN_000068600	Hedgehog protein	1.79635	710.19	202.723	1.39955e-34	GO:0005576; GO:0005615; GO:0005886; GO:0006508; GO:0007267; GO:0007275; GO:0008233; GO:0016020; GO:0016787
HmN_000127100	Glutamate receptor, ionotrophic, AMPA 3	1.79335	93.8633	26.4233	9.6038e-08	GO:0004970; GO:0005234; GO:0005886; GO:0006810; GO:0006811; GO:0016020; GO:0016021; GO:0030054; GO:0034220; GO:0035235; GO:0045202; GO:0045211
HmN_000346900	RNA directed DNA polymerase	1.79331	294.007	84.3633	1.04309e-13	GO:0003677; GO:0003721
HmN_000054200	Protein odd skipped	1.7899	169.103	48.8833	1.72132e-11	GO:0003676; GO:0046872
HmN_000833500	RIMS binding protein 2	1.78842	188.423	53.5467	1.67577e-11	GO:0005515
HmN_002194400	n/a	1.7879	312.543	89.18	1.95521e-14	GO:0005515
HmN_000139000	Rhodopsin orphan GPCR	1.78655	516.627	149.477	1.57133e-21	GO:0016020; GO:0016021; GO:0008528
HmN_000884800	Expressed protein	1.786	1451.29	421.38	2.18755e-37	GO:0005737; GO:0005515
HmN_000197400	Major facilitator superfamily domain containing protein	1.78128	669.627	194.25	8.66461e-32	GO:0006810; GO:0016020; GO:0016021; GO:0055085
HmN_000818200	Neuroligin	1.78023	82.21	24.0167	9.54838e-07	GO:0016020; GO:0016021
HmN_000757800	POU domain protein	1.78018	575.97	167.247	6.44103e-32	GO:0003677; GO:0003700; GO:0005634; GO:0006351; GO:0006355; GO:0043565
HmN_000328000	Protein Wnt	1.78008	409.22	118.503	1.54246e-18	GO:0005102; GO:0005576; GO:0005578; GO:0007275; GO:0016055
HmN_000280100	Anosmin 1	1.77722	185.15	53.3833	4.69e-08	GO:0005515
HmN_002286400	n/a	1.77488	101.647	28.89	9.68004e-08	GO:0005921
HmN_000410300	Sperm associated antigen 6	1.77475	272.97	79.8767	1.67045e-21	GO:0043248; GO:0005515; GO:0005488
HmN_002011700	n/a	1.76726	209.7	60.4233	8.42451e-07	GO:0005515
HmN_000539900	Muscarinic acetylcholine receptor M2	1.76216	563.12	165.37	4.98072e-38	GO:0004871; GO:0004930; GO:0005887; GO:0007165; GO:0007186; GO:0007213; GO:0016020; GO:0016021; GO:0016907
HmN_000072000	Zinc finger protein basonuclin 1	1.76091	410.33	120.853	1.50193e-25	GO:0046872; GO:0003676
HmN_002183500	n/a	1.7608	328.577	96.0267	2.66135e-20	n/a
HmN_000700300	Radial spoke head protein 4 A	1.75634	124.72	37.0067	1.12042e-07	n/a
HmN_000151900	ADP ribosylation factor	1.74532	1647.91	489.94	2.07331e-43	GO:0005524; GO:0007269; GO:0008021
HmN_000342800	n/a	1.73942	78.2667	23.2533	2.15411e-06	GO:0005509; GO:0016020
HmN_000522200	n/a	1.73534	574.657	172.55	3.18289e-26	GO:0016020; GO:0016021
HmN_000342500	Potassium voltage gated channel protein	1.73352	224.623	66.95	2.48379e-14	GO:0005216; GO:0005244; GO:0005249; GO:0005267; GO:0006810; GO:0006811; GO:0006813; GO:0008076; GO:0016020; GO:0016021; GO:0034765; GO:0051260; GO:0055085; GO:0071805; GO:0005515
HmN_000201200	n/a	1.73351	426.733	127.43	2.8073e-21	GO:0004930; GO:0007186; GO:0016021
HmN_000851400	GTP binding protein Di Ras2	1.73237	200.22	59.4633	2.84045e-13	GO:0000166; GO:0003924; GO:0005525; GO:0005622; GO:0006886; GO:0006913; GO:0007165; GO:0007264; GO:0008152; GO:0015031; GO:0016020
HmN_000294300	n/a	1.73093	188.863	56.9967	4.39907e-15	GO:0006820; GO:0016021; GO:0005452; GO:0016020
HmN_000505500	Carboxyl terminal PDZ ligand of neuronal nitric	1.727	635.05	191.493	1.21782e-18	GO:0005515
HmN_000080600	n/a	1.72284	660.05	198.79	4.37992e-16	GO:0016020; GO:0016021
HmN_000292400	Peptide G protein-coupled receptor	1.71772	124.797	37.35	1.60046e-10	GO:0004930; GO:0007186; GO:0016020; GO:0016021
HmN_000640500	Expressed conserved protein	1.71112	914.487	277.663	2.30487e-41	n/a
HmN_000656900	Expressed protein	1.7109	72.6533	21.75	3.76967e-06	n/a
HmN_000522900	Cell adhesion molecule	1.70733	81.81	24.8033	2.56745e-06	GO:0016020; GO:0016021; GO:0005515
HmN_000969500	Protocadherin 9	1.7024	671.813	204.997	4.97799e-43	GO:0005509; GO:0005886; GO:0007155; GO:0007156; GO:0016020; GO:0016021
HmN_000029900	Furin	1.70088	791.68	242.387	1.09001e-44	GO:0004252; GO:0006508; GO:0008233; GO:0008236; GO:0016020; GO:0016021; GO:0016787
HmN_000062400	Kinase D interacting substrate of 220 kDa	1.69538	294.197	90.8933	7.79541e-21	GO:0016020; GO:0016021; GO:0016301; GO:0016310
HmN_000827700	Leucine rich repeats and immunoglobulin	1.69363	376.77	115.553	4.85953e-25	GO:0016020; GO:0016021; GO:0005515
HmN_000172200	Protein stoned B	1.6929	849.31	261.223	4.6602e-51	GO:0006897
HmN_002147900	n/a	1.6847	2705.96	841.173	4.35943e-30	GO:0005102; GO:0007275; GO:0016055; GO:0005576
HmN_000252300	n/a	1.68	180.163	55.6367	2.352e-10	n/a
HmN_002047800	n/a	1.67901	76.9067	23.5967	6.57601e-06	n/a
HmN_000239600	V-type proton ATPase subunit a	1.67222	927.1	289.063	6.06376e-43	GO:0000220; GO:0006810; GO:0006811; GO:0015078; GO:0015991; GO:0015992; GO:0016020; GO:0016021; GO:0033179
HmN_000033200	Aspartate aminotransferase	1.67074	2723.01	855.9	2.17777e-108	GO:0003824; GO:0004069; GO:0006520; GO:0008483; GO:0009058; GO:0016740; GO:0030170; GO:0080130
HmN_002259700	n/a	1.66635	163.603	51.1233	1.65349e-08	n/a
HmN_000290900	n/a	1.66566	60.56	19.0967	5.86431e-06	n/a
HmN_000932200	Cyclic nucleotide gated cation channel	1.6602	97.3833	30.5133	1.16949e-07	GO:0005216; GO:0006810; GO:0006811; GO:0016020; GO:0016021; GO:0034220; GO:0055085
HmN_000002700	n/a	1.65917	604.183	189.627	1.52015e-24	GO:0005515
HmN_000649600	Alpha tocopherol transfer protein	1.65222	14844.7	4720.58	2.25374e-61	n/a
HmN_000720200	Alkaline phosphatase	1.64849	113.133	35.9367	1.33442e-06	GO:0003824; GO:0004035; GO:0008152; GO:0016311; GO:0016787; GO:0016791
HmN_000859900	n/a	1.64734	138.357	44.0067	3.85027e-11	GO:0005216; GO:0006810; GO:0006811; GO:0016020; GO:0016021; GO:0034220; GO:0055085
HmN_000492100	Tetraspanin 11	1.64561	124.703	39.84	2.94033e-06	GO:0016020; GO:0016021
HmN_000356500	n/a	1.63988	113.353	35.9	1.48968e-08	GO:0016020; GO:0016021
HmN_000678900	n/a	1.63653	863.2	277.177	2.71892e-36	n/a
HmN_000807400	Coiled coil domain containing protein	1.63551	126.453	39.8033	1.05527e-06	n/a
HmN_000033600	Kinesin-like protein	1.63521	529.877	170.07	5.09793e-23	GO:0000166; GO:0003777; GO:0005524; GO:0005871; GO:0005874; GO:0007018; GO:0008017; GO:0008152
HmN_000268700	Coiled coil domain containing protein	1.63489	192.693	61.4067	6.29678e-14	n/a
HmN_000661100	von Willebrand factor A domain containing protein	1.63465	96.6	31.0633	1.54105e-07	n/a
HmN_000760700	Dynein light chain	1.62994	785.433	252.407	1.47031e-11	GO:0005875; GO:0007017; GO:0030286
HmN_002012000	n/a	1.62982	177.453	57.02	3.08877e-06	GO:0016021
HmN_000095800	n/a	1.62748	869.55	279.72	2.13366e-21	GO:0005737; GO:0005856; GO:0008092; GO:0019898
HmN_002129200	n/a	1.62071	142.237	45.56	8.92171e-07	GO:0005272; GO:0006814; GO:0016020
HmN_000722400	Para nitrobenzyl esterase	1.61495	113.13	36.1467	3.94536e-06	GO:0016020; GO:0016021
HmN_002282800	n/a	1.60724	415.813	135.893	1.47669e-22	GO:0005515; GO:0007165
HmN_000916500	Tetraspanin	1.60577	579.203	190.757	6.4388e-22	GO:0016020; GO:0016021
HmN_000908000	Beta 1,3 galactosyl O glycosyl glycoprotein	1.60291	355.22	115.85	2.47384e-20	GO:0008152; GO:0008375; GO:0016020; GO:0016021
HmN_000728700	Rho GTPase activating protein	1.60017	162.523	53.04	1.06908e-07	GO:0007165
HmN_000635700	Innexin	1.59677	351.29	115.69	4.32265e-20	GO:0005921; GO:0006810; GO:0006811; GO:0016020; GO:0016021; GO:0030054
HmN_000445600	Na+ channel, amiloride sensitive	1.5964	133.803	44.0367	5.64108e-10	GO:0005272; GO:0006810; GO:0006811; GO:0006814; GO:0016020; GO:0016021; GO:0035725
HmN_000450600	n/a	1.59336	118.25	38.4633	3.25282e-06	GO:0000166; GO:0005525; GO:0005622; GO:0007165; GO:0007264; GO:0015031; GO:0016020; GO:0003924
HmN_000635800	Innexin	1.58193	870.57	290.803	5.13889e-36	GO:0005886; GO:0005921; GO:0006810; GO:0006811; GO:0016020; GO:0016021; GO:0030054
HmN_000930400	Pleckstrin y	1.57429	573.037	190.817	5.75364e-26	GO:0005856
HmN_000328100	n/a	1.57407	601.903	201.827	6.78339e-16	GO:0008140; GO:0051289
HmN_002126700	n/a	1.57165	1703.13	570.82	9.96673e-37	GO:0005515
HmN_000186000	Protocadherin 1	1.56341	576.937	194.153	3.98723e-25	GO:0005509; GO:0005886; GO:0007155; GO:0007156; GO:0016020; GO:0016021
HmN_000908400	Par cell polarity protein partition defective	1.55287	457.583	155.52	3.25675e-29	GO:0005515
HmN_000532500	n/a	1.54946	414.157	141.13	2.65345e-22	GO:0016021
HmN_000219400	n/a	1.54865	89.82	30.3667	6.75503e-06	n/a
HmN_000236400	Synaptotagmin	1.54836	741.767	252.42	7.73494e-31	GO:0016020; GO:0016021; GO:0005544; GO:0007269; GO:0008021
HmN_002197700	n/a	1.54703	114.34	38.7867	6.67102e-09	n/a
HmN_000642800	n/a	1.54689	292.707	98.95	4.19099e-14	GO:0003676
HmN_002013300	n/a	1.53941	228.36	77.92	3.16923e-12	n/a
HmN_000213200	Protocadherin fat 3	1.53821	204.76	69.5567	6.63504e-08	GO:0005509; GO:0005886; GO:0007155; GO:0007156; GO:0016020; GO:0016021
HmN_000901700	Synaptotagmin 15	1.52705	135.723	46.8733	7.27443e-10	GO:0005544; GO:0006887
HmN_000659300	n/a	1.52601	149.623	51.8667	6.71668e-08	n/a
HmN_000359700	Peptidoglycan binding lysin subgroup	1.52117	650.26	225.097	5.82517e-28	n/a
HmN_000795000	Netrin receptor DCC	1.51949	1180.16	410.243	2.44372e-26	GO:0016020; GO:0016021; GO:0005515
HmN_000231700	Tctex 1	1.51908	119.953	41.0967	1.97578e-07	n/a
HmN_000314100	Gag pol polyprotein	1.51757	713.663	247.517	1.11145e-25	n/a
HmN_000084100	n/a	1.5173	91.44	31.7633	7.24077e-06	n/a
HmN_000184000	Zinc finger protein	1.51421	90.58	31.0567	3.58891e-06	GO:0003676; GO:0046872
HmN_000914900	Neuronal calcium sensor	1.51189	393.053	136.403	1.12372e-12	GO:0005509; GO:0046872
HmN_000915000	Synaptotagmin	1.51186	185.583	64.2933	7.20048e-11	GO:0016020; GO:0016021; GO:0005544; GO:0007269; GO:0008021
HmN_000008900	Glutamate dehydrogenase	1.51	43832.5	15325.1	5.7933e-11	GO:0006520; GO:0016491; GO:0016639; GO:0055114
HmN_000064500	Nephrin	1.50867	372.413	130.283	9.0084e-16	GO:0016020; GO:0016021; GO:0005515
HmN_000801500	GATA binding factor 2	1.50398	193.517	67.79	1.38618e-13	GO:0003700; GO:0005634; GO:0006355; GO:0008270; GO:0030097; GO:0043565
HmN_000108500	Zinc finger protein	1.50323	557.983	196.04	2.15583e-17	GO:0003676; GO:0046872
HmN_002200800	n/a	1.50195	100.483	35.3867	3.51362e-08	GO:0004970; GO:0016020; GO:0005234
HmN_000044100	Expressed protein	1.50075	407.113	143.697	1.38842e-14	n/a
HmN_000912700	Spermatogenesis associated protein 6	1.49544	192.263	67.7633	2.26768e-13	n/a
HmN_000326000	Putative adam (A disintegrin and metalloprotease)	1.4934	1339.7	474.923	4.49439e-34	GO:0004222; GO:0006508; GO:0007229; GO:0008233; GO:0008237; GO:0008270; GO:0016020; GO:0016021
HmN_000756800	Receptor protein-tyrosine kinase	1.49145	1036.09	367.42	1.61609e-33	GO:0000166; GO:0004672; GO:0004713; GO:0004714; GO:0005524; GO:0006468; GO:0016020; GO:0016021; GO:0018108
HmN_000740700	p2X purinoceptor 4	1.48402	135.73	47.9567	8.04398e-10	GO:0001614; GO:0004931; GO:0005887; GO:0016020; GO:0016021; GO:0033198; GO:0035590; GO:0098655
HmN_002043000	n/a	1.48377	462.353	164.057	1.16052e-24	n/a
HmN_000429300	Calcium activated potassium channel	1.48201	262.79	93.1133	1.25237e-09	GO:0005216; GO:0006810; GO:0006811; GO:0006813; GO:0015269; GO:0016020; GO:0016021; GO:0034220; GO:0055085; GO:0060072; GO:0071805
HmN_000932600	n/a	1.48048	196.57	70.0567	1.95497e-08	GO:0005509; GO:0007156; GO:0016020; GO:0007155; GO:0005886
HmN_000099500	n/a	1.48021	606.15	216.367	1.28412e-28	n/a
HmN_000737000	ETS transcription factor Elf 1	1.47925	422.497	151.093	1.93601e-09	GO:0003677; GO:0003700; GO:0005634; GO:0006355; GO:0043565
HmN_000597200	Voltage gated hydrogen channel 1	1.47852	270.69	97.19	2.07021e-17	GO:0016020; GO:0016021; GO:0030171; GO:0015992; GO:0005887
HmN_000439000	Cys loop ligand gated ion channel subunit	1.47622	203.343	72.6867	1.39804e-10	GO:0005230; GO:0005886; GO:0006810; GO:0006811; GO:0016020; GO:0016021; GO:0030054; GO:0034220; GO:0045202; GO:0004888; GO:0005216
HmN_000689800	Protocadherin 11	1.47377	681.87	243.857	1.06985e-25	GO:0005509; GO:0005886; GO:0007155; GO:0007156; GO:0016020; GO:0016021
HmN_000102300	60S ribosomal protein L21	1.46799	2605.56	940.62	6.3674e-70	GO:0003824; GO:0005840; GO:0008152; GO:0030170
HmN_000873700	Rho GTPase activating protein 19	1.46437	644.09	232.777	8.39897e-35	GO:0007165
HmN_000286300	Nervana 2	1.46026	119.267	43.24	6.3955e-08	GO:0005890; GO:0006813; GO:0006814; GO:0016020; GO:0016021
HmN_000367500	Amino acid transporter	1.4565	3026.87	1100.92	6.32335e-29	GO:0006810; GO:0006835; GO:0015293; GO:0016020; GO:0016021; GO:0017153; GO:0055085
HmN_000317100	Cytosolic carboxypeptidase 2	1.45561	103.117	36.75	5.28445e-06	GO:0004180; GO:0004181; GO:0006508; GO:0008270
HmN_000227100	Frizzled	1.44666	1615.77	592.737	4.87988e-55	GO:0004888; GO:0007166; GO:0007275; GO:0016020; GO:0016021; GO:0016055; GO:0005515; GO:0042813
HmN_000154300	Irregular chiasm C roughest protein	1.44662	843.683	309.557	2.25657e-30	GO:0016020; GO:0016021
HmN_000151600	Expressed protein	1.44584	882.073	322.487	4.86184e-19	GO:0003677; GO:0003700; GO:0006355; GO:0006357; GO:0043565
HmN_000159800	Expressed conserved protein	1.44315	377.857	139.373	2.26094e-20	n/a
HmN_000156300	Amine (Acetylcholine) G protein-coupled receptor	1.44233	207.01	75.6167	4.85592e-06	GO:0004871; GO:0004930; GO:0007165; GO:0007186; GO:0016020; GO:0016021
HmN_000157900	Glycerol-3-phosphate dehydrogenase	1.44115	5447.98	2001.85	2.93945e-19	GO:0004368; GO:0005509; GO:0006072; GO:0009331; GO:0016491; GO:0052590; GO:0052591; GO:0055114
HmN_002133800	n/a	1.44019	177.653	65.3767	2.72176e-12	GO:0016534; GO:0016533
HmN_000771100	Expressed conserved protein	1.43718	361.347	132.76	3.08465e-12	n/a
HmN_000807500	Integrin alpha 3	1.43695	1651.56	607.873	2.71443e-21	GO:0007155; GO:0007229; GO:0008305; GO:0016020; GO:0016021
HmN_000225600	n/a	1.43158	148.15	54.58	2.92765e-09	GO:0004930; GO:0007186; GO:0016021
HmN_000158400	Ladybird	1.43152	237.663	86.8967	2.15173e-08	GO:0003677; GO:0005634; GO:0006355; GO:0043565
HmN_000704300	Cubilin	1.43076	616.667	228.247	1.57209e-18	GO:0016020; GO:0016021; GO:0005515
HmN_000324900	n/a	1.42973	186.203	69.2533	1.14304e-06	GO:0016020; GO:0016021
HmN_000566100	Expressed protein	1.42744	3789.63	1408.5	1.4605e-27	n/a
HmN_002136100	n/a	1.42742	275.433	101.78	4.54682e-11	GO:0005216; GO:0006811; GO:0055085; GO:0016020; GO:0005249; GO:0006813; GO:0008076
HmN_000169100	n/a	1.4271	4348.78	1614.35	1.0469e-45	GO:0005856
HmN_000688200	Dihydropyrimidine dehydrogenase (NADP+)	1.42683	9947.67	3692.71	4.26363e-19	GO:0003824; GO:0005737; GO:0016491; GO:0016627; GO:0051536; GO:0055114
HmN_000868200	Pyruvate kinase	1.41458	2364.26	883.68	1.00435e-15	GO:0000287; GO:0003824; GO:0004743; GO:0006096; GO:0016301; GO:0016310; GO:0016740; GO:0030955
HmN_000714500	n/a	1.41247	139.837	51.8133	1.52196e-08	GO:0016020
HmN_000169600	n/a	1.409	533.857	200.407	1.54269e-17	n/a
HmN_000831400	n/a	1.40648	149.233	56.4333	7.91231e-08	GO:0016020; GO:0016021
HmN_000748900	Vesicular glutamate transporter	1.40628	414.267	156.047	9.47097e-20	GO:0016020; GO:0016021; GO:0055085
HmN_000053800	Vesicle associated membrane protein	1.40572	487.013	183.77	5.36759e-29	GO:0016020; GO:0016021; GO:0016192
HmN_000277900	n/a	1.40499	1069.92	403.017	6.08596e-55	GO:0016020; GO:0016021
HmN_000331700	n/a	1.40334	822.107	310.92	2.64896e-41	GO:0004781; GO:0000103; GO:0004020; GO:0005524
HmN_000647400	Vesicle associated membrane protein 1	1.40176	336.877	126.793	2.13847e-17	GO:0016020; GO:0016021; GO:0016192
HmN_000311000	Forkhead box protein D1	1.39481	279.28	104.813	1.2637e-09	GO:0003677; GO:0003700; GO:0005634; GO:0006351; GO:0006355; GO:0043565
HmN_000051400	n/a	1.39474	241.133	90.5633	2.25515e-08	GO:0005509; GO:0007156; GO:0016020; GO:0007155; GO:0005886
HmN_000118300	Colorectal mutant cancer protein	1.39143	930.6	354.46	4.43266e-24	n/a
HmN_000774600	Universal stress protein	1.38918	487.283	185	8.62281e-08	GO:0006950
HmN_000380600	Leucine rich repeat domain containing protein	1.38357	927.98	353.77	1.6885e-23	GO:0016020; GO:0016021; GO:0005515
HmN_000778100	n/a	1.38188	1279.81	489.043	1.89597e-36	n/a
HmN_000366500	Glutathione S transferase	1.38006	9889.42	3795.52	4.11515e-28	GO:0008152; GO:0016740; GO:0005515
HmN_000853800	Notch	1.37749	1143.09	438.203	4.58615e-29	GO:0005509; GO:0016020; GO:0016021; GO:0005515
HmN_000770600	Expressed conserved protein	1.37739	288.06	109.77	2.21575e-09	n/a
HmN_000605500	Neurogenic locus protein delta	1.37284	520.967	200.253	2.10405e-19	GO:0005509; GO:0007154; GO:0016020; GO:0016021
HmN_002136000	n/a	1.36537	242.21	94.1467	6.94861e-13	GO:0051260; GO:0005249; GO:0006813; GO:0008076
HmN_000041700	n/a	1.36233	3111.28	1210.44	1.90909e-54	GO:0017147; GO:0016055
HmN_000704600	n/a	1.36165	713.223	275.79	6.00141e-19	n/a
HmN_000210900	Innexin	1.35515	438.947	170.843	4.61983e-15	GO:0005886; GO:0005921; GO:0006810; GO:0006811; GO:0016020; GO:0016021; GO:0030054
HmN_000376900	Ribosomal protein L18	1.35478	814.37	317.207	1.37768e-09	GO:0003735; GO:0005622; GO:0005840; GO:0006412
HmN_000890400	Amine (Acetylcholine) G protein-coupled receptor	1.34869	102.077	39.9833	1.37588e-06	GO:0004871; GO:0004930; GO:0007165; GO:0007186; GO:0016020; GO:0016021
HmN_000272000	Adenosine 3' phospho 5' phosphosulfate	1.3437	291.18	114.74	4.60244e-16	GO:0006810; GO:0016020; GO:0016021; GO:0055085
HmN_000511200	Expressed protein	1.34166	1136.23	447.473	9.91202e-22	GO:0005515
HmN_000137100	Expressed conserved protein	1.33972	1665.49	658.743	1.26775e-47	GO:0016020; GO:0016021
HmN_000108100	Protein Wnt	1.33652	303.687	119.753	2.77435e-09	GO:0005102; GO:0005576; GO:0005578; GO:0007275; GO:0016055
HmN_000597800	Ferritin	1.32677	9872.4	3926.68	1.42009e-12	GO:0004322; GO:0005623; GO:0006826; GO:0006879; GO:0008199; GO:0016491; GO:0046872; GO:0055114
HmN_000739300	n/a	1.32554	1819.97	724.32	5.55322e-40	GO:0043087; GO:0007165
HmN_002139900	n/a	1.32215	301.923	120.087	1.0528e-11	n/a
HmN_000134900	Pleckstrin y type	1.31558	239.287	95.9833	7.02485e-07	GO:0005158
HmN_000593300	n/a	1.31546	259.75	103.517	5.99439e-11	n/a
HmN_002039400	n/a	1.31249	191.77	76.6133	9.55821e-09	n/a
HmN_000691000	p2X purinoceptor 4	1.30961	95.3233	38.2467	3.80989e-06	GO:0001614; GO:0004931; GO:0005887; GO:0016020; GO:0016021; GO:0033198; GO:0035590; GO:0098655
HmN_000465400	n/a	1.30765	298.187	119.543	9.97712e-12	n/a
HmN_000722700	n/a	1.30526	367.237	148	7.62508e-10	GO:0016020; GO:0016021
HmN_002244000	n/a	1.3037	184.9	75.08	1.25117e-07	GO:0004672; GO:0006468; GO:0005524; GO:0004713
HmN_000098400	Bone morphogenetic protein antagonist noggin	1.3037	657.9	266.017	4.59287e-33	GO:0030514; GO:0045596
HmN_000805700	Mitogen-activated protein kinase	1.30104	4127.83	1672.05	3.01479e-19	GO:0000165; GO:0000166; GO:0004672; GO:0004674; GO:0004707; GO:0005524; GO:0005622; GO:0006468; GO:0016301; GO:0016310; GO:0016740
HmN_000279700	Adenylate cyclase	1.29438	800.91	326.677	2.83407e-38	GO:0016020; GO:0016021
HmN_000711200	Myeloid ecotropic viral integration site	1.29395	3596.43	1463.57	8.28543e-23	GO:0003677; GO:0005634; GO:0006355
HmN_000021800	n/a	1.29111	5178.05	2113.83	1.73625e-53	n/a
HmN_000250100	Nuclear receptor subfamily 1 group D	1.29062	198.927	80.5467	2.41012e-10	GO:0003677; GO:0003700; GO:0005634; GO:0006351; GO:0006355; GO:0008270; GO:0043401; GO:0043565; GO:0046872
HmN_000612000	Sodium:potassium dependent atpase beta subunit	1.29005	335.56	136.61	5.7119e-08	GO:0005890; GO:0006813; GO:0006814
HmN_000007800	Zinc finger, C2H2 type	1.28728	2016.06	824.267	1.02119e-39	GO:0046872; GO:0003676
HmN_000451500	Cys loop ligand gated ion channel subunit	1.2821	118.347	47.86	4.6205e-06	GO:0005230; GO:0005886; GO:0006810; GO:0006811; GO:0016020; GO:0016021; GO:0030054; GO:0034220; GO:0045202; GO:0004888; GO:0005216
HmN_000590400	Complexin	1.28158	830.283	340.437	2.19902e-22	GO:0006836; GO:0019905
HmN_000599500	Bruno 4, RNA binding protein	1.27962	1491.08	613.077	2.7166e-20	GO:0000166; GO:0003676
HmN_000060200	Poly(ADP ribose) glycohydrolase ARH3	1.27735	4913	2024.7	6.12912e-36	GO:0008152; GO:0016787
HmN_000844100	Tetraspanin	1.27582	10783.7	4441.45	4.78796e-10	GO:0016020; GO:0016021
HmN_002126400	n/a	1.27554	372.59	153.377	1.30232e-09	GO:0004672; GO:0005524; GO:0006468
HmN_000484400	DNAj subfamily C member	1.27348	287.143	119.277	3.60633e-10	GO:0016020; GO:0016021
HmN_000718800	Roundabout 2	1.2701	418.193	171.727	1.89437e-08	GO:0016020; GO:0016021; GO:0005515
HmN_000516500	Protocadherin 9	1.26383	569.137	235.317	2.80761e-13	GO:0005509; GO:0005886; GO:0007155; GO:0007156; GO:0016020; GO:0016021
HmN_000157800	AT rich interactive domain containing protein	1.26191	564.987	235.22	3.26931e-18	GO:0003677
HmN_000704200	Solute carrier family 13	1.26182	584.647	242.597	4.19262e-08	GO:0005215; GO:0006814; GO:0016020; GO:0016021; GO:0055085
HmN_000175600	Prefoldin	1.26145	4014.94	1672.16	7.14084e-25	n/a
HmN_000862800	NADP dependent malic enzyme	1.25418	8812.56	3682.28	3.88866e-08	GO:0004470; GO:0004471; GO:0006108; GO:0051287; GO:0055114
HmN_002155500	n/a	1.25244	605.15	252.607	3.05488e-08	GO:0003824
HmN_000477800	Expressed protein	1.25	246.16	103.273	9.55503e-09	GO:0016020; GO:0016021
HmN_000036800	Expressed protein	1.2482	382.057	160.937	1.75785e-07	n/a
HmN_000861400	Mab 21 protein	1.24789	190.843	79.7133	1.95104e-09	n/a
HmN_000433900	n/a	1.24596	295.603	124.627	6.66429e-12	GO:0016020; GO:0016021
HmN_002055700	n/a	1.24452	242.08	101.933	1.48422e-11	n/a
HmN_000230000	Hydrocephalus inducing protein	1.24267	596.187	250.973	2.4822e-23	n/a
HmN_000022800	Protein Wnt	1.22871	876.983	373.187	2.33583e-24	GO:0005102; GO:0005576; GO:0005578; GO:0007275; GO:0016055
HmN_000159700	Expressed conserved protein	1.22832	4354.19	1857.93	5.15695e-20	GO:0016020; GO:0016021
HmN_000431000	GTPase activating Rap:RanGAP domain 3	1.22314	411.053	174.653	2.36773e-13	GO:0005096; GO:0043547; GO:0051056
HmN_002086900	n/a	1.22245	111.807	48.05	1.81156e-06	GO:0004672; GO:0006468; GO:0005524; GO:0004713
HmN_000371100	n/a	1.2206	832.167	355.107	3.27841e-16	GO:0005515; GO:0004725; GO:0006470; GO:0016311; GO:0016791
HmN_000055300	FMRFamide activated amiloride sensitive sodium	1.22057	303.233	129.59	3.77411e-12	GO:0005272; GO:0006810; GO:0006811; GO:0006814; GO:0016020; GO:0016021; GO:0035725
HmN_002102800	n/a	1.21815	360.853	153.903	1.44057e-12	n/a
HmN_000520700	RNA binding protein Musashi Rbp6	1.2161	3636.91	1561.49	1.86892e-13	GO:0000166; GO:0003676
HmN_000137600	Ileal sodium:bile acid cotransporter	1.21354	163.513	70.4933	6.11606e-07	GO:0016020; GO:0016021
HmN_000010800	Transcriptional enhancer factor TEF 5	1.21263	854.087	367.673	3.42859e-30	GO:0003700; GO:0005634; GO:0006355
HmN_000638100	n/a	1.2118	271.88	116.423	5.2099e-07	n/a
HmN_000011600	Clathrin light chain a	1.21126	439.76	188.727	3.06819e-10	GO:0005198; GO:0006886; GO:0016192; GO:0030130; GO:0030132
HmN_000530500	Iron dependent peroxidase	1.21018	21536.7	9305.32	1.87666e-43	GO:0004601; GO:0020037; GO:0055114
HmN_000253300	n/a	1.20609	390.07	168.043	1.47077e-09	n/a
HmN_000071500	Small GTP binding protein Rab4	1.20432	452.54	195.307	9.20039e-14	GO:0003677; GO:0003700; GO:0005634; GO:0006355; GO:0043565
HmN_000455900	n/a	1.20423	1986.82	861.283	1.33044e-29	n/a
HmN_000315600	n/a	1.20177	122.16	52.8333	3.86558e-06	n/a
HmN_000555700	Anosmin 1	1.20021	841.097	365.68	1.66593e-15	GO:0005515
HmN_002197300	n/a	1.198	789.97	342.667	1.03595e-22	n/a
HmN_000511400	Myosin essential light chain	1.19792	9955.69	4333.69	2.1529e-17	GO:0005509
HmN_000021000	Phosphoglucomutase 2	1.19539	15137.1	6599.09	9.27195e-14	GO:0000287; GO:0005975; GO:0016868; GO:0071704
HmN_000391800	n/a	1.19335	270.98	118.667	8.72215e-08	GO:0005515
HmN_000154500	Purple acid phosphatase	1.19246	948.803	415.797	6.50638e-26	GO:0003993; GO:0008152; GO:0016311; GO:0016787; GO:0046872; GO:0005515
HmN_000845600	Lysophospholipid acyltransferase 7	1.19019	239.963	104.543	2.27695e-11	GO:0008152; GO:0016020; GO:0016021; GO:0016740; GO:0016746
HmN_000077300	Cationic amino acid transporter	1.18994	3384.98	1481.78	4.60244e-16	GO:0003333; GO:0015171; GO:0016020; GO:0016021; GO:0022857; GO:0055085
HmN_000483200	Protocadherin 8	1.18763	255.563	111.25	6.18674e-10	GO:0005509; GO:0005886; GO:0007155; GO:0007156; GO:0016020; GO:0016021
HmN_000270700	Tyrosine protein kinase pr2	1.18688	891.993	391.42	6.93501e-13	GO:0016301; GO:0016310
HmN_000832200	Expressed conserved protein	1.17859	281.493	123.91	5.65016e-13	n/a
HmN_000617800	Dihydropyrimidinase	1.17777	7798.13	3443.31	1.1526e-29	GO:0005737; GO:0008152; GO:0016787; GO:0016810
HmN_000251300	cAMP dependent protein kinase catalytic subunit	1.17743	909.717	401.097	1.37269e-10	GO:0000166; GO:0004672; GO:0004674; GO:0005524; GO:0006468; GO:0016301; GO:0016310; GO:0016740
HmN_000147900	Neuronal calcium sensor	1.17247	627.107	277.367	1.59418e-23	GO:0005509; GO:0046872
HmN_000235400	Neuropilin (Nrp) and tolloid (Tll)	1.16718	462.173	205.3	6.12787e-16	GO:0016020; GO:0016021; GO:0005515
HmN_000455300	Zinc-finger homeobox	1.16589	589.497	261.413	2.37089e-15	GO:0003676; GO:0003677; GO:0005634; GO:0006355; GO:0008270; GO:0043565
HmN_000025500	n/a	1.16565	110.683	49.14	3.011e-06	n/a
HmN_000197200	Immunoglobulin subtype	1.16469	284.737	126.27	3.57208e-07	GO:0016020; GO:0016021
HmN_000818500	Beta ketoacyl synthase,domain containing protein	1.1611	467.37	209.357	5.10851e-20	n/a
HmN_000322400	Lachesin	1.15835	139.503	62.1767	3.15339e-07	n/a
HmN_000668400	Zinc finger protein	1.15733	143.933	64.32	4.20383e-07	GO:0003676; GO:0046872
HmN_000174600	Serine:threonine protein kinase SIK3	1.15563	725.26	323.793	4.24135e-11	GO:0000166; GO:0004672; GO:0005524; GO:0006468; GO:0016301; GO:0016310
HmN_000055100	Transcriptional repressor protein YY1	1.15269	989.477	443.243	3.20605e-19	GO:0003676; GO:0046872
HmN_000096300	Beta 1 syntrophin	1.15073	254.09	114.593	1.57089e-08	GO:0005198; GO:0016010; GO:0050808; GO:0005515
HmN_002153600	n/a	1.15053	183.69	82.72	8.4631e-06	GO:0005856
HmN_000058000	Kinesin-like protein	1.14925	524.03	235.683	2.22032e-20	GO:0000166; GO:0003777; GO:0005524; GO:0005871; GO:0005874; GO:0007018; GO:0008017; GO:0008152; GO:0005515
HmN_000173000	Ankyrin repeat domain containing protein 10	1.14735	464.64	208.3	1.11579e-12	GO:0005515
HmN_000391100	Cadherin	1.14722	367.273	164.457	3.49182e-10	GO:0005509; GO:0005886; GO:0007155; GO:0007156; GO:0016020; GO:0016021
HmN_000623500	Tyrosine-protein kinase	1.14587	490.95	221.413	8.24606e-17	GO:0000166; GO:0004672; GO:0004713; GO:0004715; GO:0005524; GO:0006468; GO:0016301; GO:0016310; GO:0016740; GO:0018108; GO:0005515
HmN_000257900	Transmembrane protein 45B	1.14511	7533.78	3402.69	2.1275e-33	GO:0016020; GO:0016021
HmN_000005300	Tyrosine-protein kinase receptor	1.14184	448.707	202.13	2.66562e-14	GO:0000166; GO:0004672; GO:0004713; GO:0004714; GO:0005524; GO:0006468; GO:0007169; GO:0016020; GO:0016021; GO:0016301; GO:0016310; GO:0018108; GO:0005515
HmN_002107100	n/a	1.13916	437.18	197.147	2.61809e-14	GO:0048786
HmN_000451800	Guanine nucleotide binding protein (G protein)	1.13718	2038.54	924.477	1.39243e-12	GO:0000166; GO:0003924; GO:0004871; GO:0005525; GO:0007165; GO:0007186; GO:0007188; GO:0008152; GO:0019001; GO:0031683
HmN_000878900	Anti dorsalizing morphogenetic protein 1a	1.13498	452.82	206.467	2.56087e-14	GO:0005576; GO:0008083; GO:0040007
HmN_000601400	Prohormone 4	1.13365	377.95	171.523	1.38215e-08	GO:0005515
HmN_002289000	n/a	1.13275	1958.64	892.67	1.14233e-30	n/a
HmN_000330100	Tetraspanin	1.13267	6791.92	3096.14	1.32581e-30	GO:0016020; GO:0016021
HmN_000372700	Serine:threonine protein phosphatase 2A 56 kDa	1.12802	256.257	116.423	5.8097e-10	GO:0000159; GO:0007165; GO:0034047; GO:0019888; GO:0005488
HmN_000204500	Pdz domain containing protein	1.12098	909.1	417.06	8.03276e-14	GO:0005515
HmN_002148000	n/a	1.11953	1735.07	796.257	6.75833e-18	GO:0016715; GO:0055114; GO:0004497; GO:0005507; GO:0005515; GO:0003824; GO:0006518; GO:0016020
HmN_000554500	n/a	1.11614	490.19	225.94	1.31479e-06	GO:0015293; GO:0016021
HmN_000818700	GPI mannosyltransferase 3	1.11238	613.23	282.243	1.34132e-14	GO:0008152; GO:0016020; GO:0016021; GO:0016740; GO:0016757
HmN_000477900	Pro neuregulin 2, membrane bound	1.11053	260.617	119.95	4.58578e-10	n/a
HmN_000120300	Solute carrier family 2, facilitated glucose	1.10717	1291.24	598.063	6.2835e-16	GO:0005215; GO:0006810; GO:0016020; GO:0016021; GO:0022857; GO:0022891; GO:0055085
HmN_000008700	Zinc finger SWIM domain containing protein	1.10478	753.5	349.457	1.82054e-18	GO:0008270
HmN_000042200	SH2 domain containing adapter protein F	1.10223	1023.72	474.85	3.85727e-16	n/a
HmN_000258000	Ras responsive element binding protein 1	1.09962	143.257	66.54	8.48211e-06	GO:0003676; GO:0046872
HmN_002018100	n/a	1.09667	693.17	323.62	2.05451e-17	GO:0003677; GO:0006355; GO:0003700; GO:0005634; GO:0043565; GO:0046982; GO:0006357
HmN_000108400	Zinc finger protein	1.09571	1131.66	528.403	1.23056e-07	GO:0003676; GO:0046872
HmN_000401100	Peripheral plasma membrane protein CASK	1.09533	519.73	242.31	6.5271e-20	GO:0004672; GO:0005524; GO:0006468; GO:0005515
HmN_000403400	Expressed protein	1.09479	942.343	440.88	6.70361e-10	n/a
HmN_000298000	Lysosomal protein NCU G1 B	1.09408	3740.21	1752.06	5.33466e-27	n/a
HmN_000271600	Expressed protein	1.09181	5901.18	2766.03	6.24407e-31	GO:0006807; GO:0016810
HmN_000819100	Retinol dehydrogenase 11	1.08982	7866.49	3693.56	4.24724e-30	GO:0008152; GO:0016491; GO:0055114
HmN_000675500	Transporter	1.08907	1290.88	604.493	2.45567e-19	GO:0005328; GO:0006810; GO:0006836; GO:0015293; GO:0016020; GO:0016021; GO:0055085
HmN_000489700	n/a	1.0886	790.157	370.22	4.71242e-12	GO:0005515
HmN_000682000	n/a	1.08826	607.013	284.86	4.88736e-15	GO:0005515; GO:0004672; GO:0006468; GO:0005524; GO:0004713
HmN_000159900	Expressed conserved protein	1.08721	1911.68	900.39	1.78551e-31	n/a
HmN_000889100	Dystrobrevin	1.08703	333.877	156.63	1.70344e-10	GO:0008270
HmN_000027400	Oxysterol-binding protein	1.08652	303.91	143.283	9.9428e-13	GO:0006810; GO:0006869
HmN_001005900	Monocarboxylate transporter	1.08496	218.923	102.747	6.39553e-06	GO:0016020; GO:0016021; GO:0055085
HmN_000196300	Tripartite motif containing protein 3	1.08451	229.34	107.47	5.65596e-07	GO:0005515
HmN_000192700	Junction plakoglobin	1.08252	412.407	193.513	1.42009e-12	GO:0005198; GO:0045294; GO:0045296; GO:0002159; GO:0007155; GO:0005913; GO:0016342; GO:0005488
HmN_002208500	n/a	1.08121	1063	501.78	3.81404e-14	GO:0008168; GO:0008152
HmN_000231200	Ankyrin	1.07935	1867.95	883.62	5.47115e-40	GO:0006520; GO:0005515
HmN_000781300	3 hydroxyacyl coenzyme A dehydrogenase	1.07717	1084.14	512.243	7.08946e-11	GO:0008152; GO:0016491; GO:0055114
HmN_002196000	n/a	1.07633	772.39	366.41	4.79924e-25	n/a
HmN_000161700	Beta catenin	1.06474	4050.53	1931	1.63286e-07	GO:0004871; GO:0007165; GO:0034333; GO:0005515; GO:0005488
HmN_000545300	Protocadherin 2 gamma c6 sCP1	1.064	710.44	340.193	2.35888e-19	GO:0005509; GO:0005886; GO:0007155; GO:0007156; GO:0016020; GO:0016021
HmN_000122100	Expressed protein	1.06252	1294.59	619.67	1.99039e-15	n/a
HmN_002073000	n/a	1.06035	10222.7	4897.55	8.87035e-23	GO:0003824; GO:0006084
HmN_002129700	n/a	1.06032	1644.81	786.95	3.2147e-12	GO:0003723; GO:0009982; GO:0001522; GO:0009451
HmN_000553700	RAB interacting factor	1.06006	8023.14	3847.73	3.65814e-74	n/a
HmN_000433400	Strabismus	1.05583	731.593	350.063	2.14765e-10	GO:0007275; GO:0016020; GO:0016021
HmN_000004000	n/a	1.05369	896.6	431.483	4.33201e-09	n/a
HmN_000108600	Zinc finger protein	1.05358	425.72	203.74	2.64044e-07	GO:0003676; GO:0046872
HmN_002022900	n/a	1.0521	5047.42	2428.42	3.28803e-06	GO:0003954; GO:0008137; GO:0005739
HmN_000797200	Tumor protein p63	1.05206	713.777	342.923	3.26291e-16	GO:0003677; GO:0003700; GO:0005634; GO:0006355; GO:0006915; GO:0044212
HmN_000627300	n/a	1.05105	330.28	158.267	1.47603e-09	GO:0004672; GO:0005524; GO:0006468; GO:0004703; GO:0007165; GO:0004674
HmN_000382200	Pdz domain containing protein	1.05083	1514.79	729.693	4.97897e-20	GO:0005515
HmN_000366400	Glutathione S transferase	1.05081	3784.19	1824.27	8.06292e-10	GO:0008152; GO:0016740; GO:0005515
HmN_000429600	Zinc finger, FLYWCH type	1.04888	377.147	181.437	7.65736e-09	GO:0046872; GO:0003676
HmN_000231500	Transaldolase	1.04861	10914.5	5271.58	8.09033e-18	GO:0003824; GO:0004386; GO:0004801; GO:0005737; GO:0005975; GO:0006098; GO:0016740
HmN_000236500	Protocadherin 11	1.0476	1679.17	811.557	3.99179e-12	GO:0005509; GO:0005886; GO:0007155; GO:0007156; GO:0016020; GO:0016021
HmN_000602000	Protein patched homolog 1	1.04499	1887.98	913.26	4.26874e-18	GO:0016020; GO:0016021
HmN_000386300	n/a	1.04418	455.577	220.94	1.61507e-08	GO:0005515; GO:0007166; GO:0016020; GO:0004888; GO:0016021
HmN_000568300	IQ motif and SEC7 domain containing protein 1	1.04408	1301.68	630.733	1.01516e-23	GO:0005086; GO:0032012; GO:0043547; GO:0005515
HmN_000417900	Expressed conserved protein	1.04315	3089.9	1499.3	7.70929e-24	n/a
HmN_000633800	Histone H2A	1.04251	306.153	147.977	4.82357e-12	GO:0000786; GO:0003677; GO:0005634; GO:0005694; GO:0046982
HmN_002101400	n/a	1.04206	15701.4	7618.47	1.58156e-21	GO:0042026; GO:0005737; GO:0005524; GO:0006457
HmN_002012500	n/a	1.04035	2194.5	1066.23	1.88774e-52	GO:0005506; GO:0016705; GO:0020037; GO:0055114; GO:0008270; GO:0006355; GO:0043401; GO:0003700; GO:0043565; GO:0005634; GO:0003677; GO:0003707
HmN_000263500	Sodium:potassium dependent atpase beta subunit	1.03874	1734.43	842.873	1.04168e-24	GO:0005890; GO:0006813; GO:0006814
HmN_000143300	Zinc finger, C2H2 type	1.03729	1392.92	678.843	9.65287e-32	GO:0005622; GO:0006886; GO:0046872; GO:0003676
HmN_000898200	Expressed protein	1.03034	1977.71	967.85	2.18712e-26	n/a
HmN_000101100	n/a	1.02952	705.87	344.35	1.15476e-13	GO:0005488
HmN_000455200	n/a	1.02867	877.117	429.013	2.57887e-13	n/a
HmN_000663600	Diacylglycerol kinase	1.0278	125.053	61.0167	9.30865e-06	GO:0000166; GO:0004143; GO:0005524; GO:0007205; GO:0016301; GO:0016310; GO:0016740; GO:0003951; GO:0008152
HmN_000763900	TNFR CD27 30 40 95 cysteine rich region	1.02778	830.237	406.16	6.80973e-23	GO:0016020; GO:0016021
HmN_000241100	Metabotropic glutamate receptor 5	1.02701	336.77	164.217	2.34495e-08	GO:0004871; GO:0004930; GO:0005886; GO:0007165; GO:0007186; GO:0016020; GO:0016021
HmN_000773600	n/a	1.02482	314.567	153.933	6.36869e-09	GO:0016020; GO:0016021
HmN_002199000	n/a	1.02328	219.163	107.363	8.38275e-06	n/a
HmN_000471100	Crumbs 1	1.0218	1714.07	843.813	7.73428e-17	GO:0016020; GO:0016021
HmN_000142400	Dynein beta chain, ciliary	1.02117	736.873	362.123	4.454e-13	GO:0000166; GO:0003777; GO:0005524; GO:0007018; GO:0008152; GO:0016887; GO:0030286
HmN_002265500	n/a	1.01889	227.03	111.047	2.81822e-07	GO:0016020
HmN_000240800	n/a	1.01639	4018.04	1983.85	2.25301e-23	GO:0016491; GO:0055114; GO:0008746; GO:0015992
HmN_002175900	n/a	1.01441	656.8	323.56	1.61202e-11	n/a
HmN_000681200	VWFA and cache domain containing protein 1	1.01404	1358.31	671.057	5.09049e-15	GO:0016020; GO:0016021
HmN_000407500	n/a	1.01256	579.553	287.457	1.69496e-16	n/a
HmN_000896100	Ataxin 1	1.00741	330.243	164.197	4.52249e-10	GO:0003723; GO:0005515
HmN_000291700	n/a	1.007	557.837	277.35	1.80471e-10	GO:0016020; GO:0016021
HmN_000035400	Glycerol kinase 5	1.00395	708.05	351.333	3.09477e-09	GO:0005975; GO:0016301; GO:0016310; GO:0016773
HmN_000254600	n/a	1.00254	1805.77	900.577	4.01208e-22	GO:0030514; GO:0045596
HmN_000840400	Zinc finger transcription factor gli2	1.00129	1748.13	870.927	7.98074e-11	GO:0003676; GO:0046872
HmN_000629200	ARF GTPase activating protein GIT2	1.00047	914.68	456.467	3.36547e-20	GO:0005096; GO:0043547; GO:0005515
HmN_000738700	n/a	0.998736	188.007	94.2367	7.37328e-06	GO:0003777; GO:0005524; GO:0008017; GO:0007018
HmN_000664800	GPCR, family 3, C terminal	0.996409	181.187	90	8.66717e-07	GO:0004930; GO:0007186; GO:0016020; GO:0016021
HmN_000685700	Citrate synthase	0.995624	1413.81	706.91	6.40009e-14	GO:0004108; GO:0006099; GO:0006101; GO:0016740; GO:0046912
HmN_002184900	n/a	0.993397	765.647	384.517	3.14318e-06	n/a
HmN_000820800	n/a	0.991733	949.023	476.187	4.7326e-11	n/a
HmN_000163300	n/a	0.987109	517.363	260.503	9.16173e-17	n/a
HmN_000529700	Aspartate aminotransferase, mitochondrial	0.987088	10514	5300.03	3.88803e-14	GO:0003824; GO:0006520; GO:0008483; GO:0009058; GO:0016740; GO:0030170
HmN_000428000	Glutamate receptor interacting protein	0.983898	381.597	192.07	1.76058e-10	GO:0016358; GO:0030159; GO:0005515
HmN_000403500	Expressed protein	0.982351	1378.75	698.427	1.08103e-16	n/a
HmN_000561800	Cationic amino acid transporter	0.980908	419.89	212.22	3.40482e-09	GO:0003333; GO:0015171; GO:0016020; GO:0016021; GO:0022857; GO:0055085
HmN_000548000	Epidermal growth factor receptor kinase	0.979857	1901.45	963.033	5.2334e-36	GO:0016301; GO:0016310; GO:0005515
HmN_002109700	n/a	0.975096	563.4	286.023	5.50402e-13	GO:0016779; GO:0009058
HmN_002121800	n/a	0.974212	492.243	249.803	4.13891e-14	GO:0005509; GO:0007156; GO:0016020; GO:0007155; GO:0005886
HmN_000226500	Lon protease homolog	0.973818	2122.29	1077.63	1.34816e-11	GO:0000166; GO:0004176; GO:0004252; GO:0005524; GO:0006508; GO:0006515; GO:0008233; GO:0008236; GO:0016787; GO:0030163
HmN_002183100	n/a	0.972282	1292.44	657.15	7.64592e-08	n/a
HmN_000091900	Expressed protein	0.972125	268.997	137.287	4.51946e-07	n/a
HmN_000291800	n/a	0.970305	300.29	152.98	3.7493e-10	GO:0004725; GO:0006470; GO:0016791; GO:0016311
HmN_002116900	n/a	0.968915	22075.7	11253.8	5.53657e-06	GO:0016020; GO:0005740; GO:0016021
HmN_000583100	Neuroendocrine convertase 2	0.967211	1227.81	627.703	2.13694e-25	GO:0004252; GO:0006508; GO:0008233; GO:0008236; GO:0016787
HmN_000136800	Expressed conserved protein	0.966837	1747.58	891.977	3.81158e-08	n/a
HmN_000185400	n/a	0.966797	309.067	157.66	3.29171e-08	GO:0016020; GO:0016021
HmN_000879600	Synaptogyrin 2	0.965971	358.897	183.267	3.99658e-08	GO:0016020; GO:0016021
HmN_000686400	Acetylcholinesterase	0.963646	928.3	476.63	7.50861e-12	n/a
HmN_002020200	n/a	0.963017	1304.12	668.79	1.7974e-19	GO:0016021
HmN_000623400	Tyrosine-protein kinase	0.962405	753.49	386.09	1.95035e-14	GO:0000166; GO:0004672; GO:0004713; GO:0004715; GO:0005524; GO:0006468; GO:0016301; GO:0016310; GO:0016740; GO:0018108
HmN_000202500	n/a	0.962044	400.793	205.077	1.36473e-11	GO:0005515
HmN_000834650	Cytochrome B561	0.960491	1238.31	636.633	3.22233e-27	GO:0000293; GO:0016020; GO:0016021; GO:0022865; GO:0022900; GO:0055085; GO:0055114
HmN_000267000	Selenophosphate synthetase 1	0.959087	1889.89	970.05	1.13234e-26	GO:0005524; GO:0004756; GO:0016260
HmN_000686500	BC026374 protein (S09 family)	0.958964	1680.04	865.03	1.18114e-19	n/a
HmN_000069800	Tegumental antigen	0.957764	950.873	489.343	5.41984e-09	GO:0005875; GO:0007017; GO:0030286; GO:0005509
HmN_000004100	Expressed conserved protein	0.954648	3248.79	1673.89	5.12266e-07	n/a
HmN_000250200	n/a	0.954349	437.077	225.373	3.27863e-09	GO:0004970; GO:0016020; GO:0005234; GO:0004872; GO:0005216; GO:0006811
HmN_000706100	cAMP responsive element binding protein 3	0.952099	2601.12	1342.5	1.15332e-18	GO:0003700; GO:0006355; GO:0043565; GO:0003677
HmN_000751600	Related to multifunctional cyclin dependent	0.95195	3790.61	1958.17	1.90659e-28	GO:0006629; GO:0008081; GO:0030246
HmN_001026500	60S ribosomal protein L18	0.951226	1120.73	579.237	9.07985e-07	GO:0003735; GO:0005622; GO:0005840; GO:0006412
HmN_000787900	Variable lymphocyte receptor	0.950671	443.997	228.867	4.22829e-10	GO:0016020; GO:0016021; GO:0005515
HmN_000673800	Thioredoxin glutathione reductase	0.950153	15373.6	7952.83	6.74977e-22	GO:0004791; GO:0005623; GO:0009055; GO:0015035; GO:0016491; GO:0016668; GO:0045454; GO:0050660; GO:0055114
HmN_000167400	Expressed conserved protein	0.949716	450.8	234.087	1.09479e-07	GO:0005515
HmN_000309600	NAD kinase	0.947126	538.827	280.62	1.48707e-09	GO:0003951; GO:0006741; GO:0008152; GO:0016301; GO:0016310; GO:0019674
HmN_002182600	n/a	0.944932	2752.03	1426.3	2.91731e-11	n/a
HmN_000588400	Actin protein 7B	0.94236	642.897	334.307	2.80681e-10	n/a
HmN_000168300	ATPase family AAA domain containing protein	0.942311	1952.71	1013.35	4.29617e-16	GO:0000166; GO:0005524
HmN_000359400	Secreted frizzled protein 5	0.941733	2930.44	1522.96	9.33624e-25	GO:0007275; GO:0016055; GO:0005515
HmN_000890300	Myelin proteolipid	0.940944	211.22	110.197	1.56023e-07	GO:0016020; GO:0016021
HmN_000606200	Bcl 2 ous antagonist:killer	0.938709	3704.99	1931.05	2.50469e-21	GO:0042981
HmN_000175700	Voltage dependent anion channel protein 2	0.937579	1862.36	971.853	1.06441e-11	GO:0005741; GO:0006820; GO:0008308; GO:0044070; GO:0055085; GO:1903959; GO:0098656
HmN_000402700	Expressed conserved protein	0.936315	1263.84	660.483	3.53068e-15	n/a
HmN_000024800	n/a	0.925206	7399.49	3891.38	4.1001e-10	GO:0003824; GO:0006084
HmN_002065800	n/a	0.923785	823.557	432.283	5.40104e-16	GO:0005509; GO:0005544
HmN_002131600	n/a	0.923629	284.087	149.233	3.19562e-08	n/a
HmN_000025600	2 amino 3 ketobutyrate coenzyme A ligase	0.922097	1258.16	661.877	2.49675e-10	GO:0003824; GO:0006567; GO:0008152; GO:0008890; GO:0009058; GO:0016740; GO:0016874; GO:0030170
HmN_002180400	n/a	0.921844	471.88	247.95	1.6633e-08	GO:0005085; GO:0007264
HmN_000695800	Ras C3 botulinum toxin substrate 1	0.920862	343.54	182.157	7.80033e-08	GO:0000166; GO:0005525; GO:0005622; GO:0007165; GO:0007264; GO:0015031; GO:0016020; GO:0003924
HmN_000016800	Transketolase	0.92012	13645.6	7209.26	1.18628e-35	GO:0003824; GO:0008152
HmN_000130000	Carbonic anhydrase	0.919615	6559.36	3463.85	3.79173e-10	GO:0004089; GO:0006730; GO:0008270; GO:0046872
HmN_000261600	Triosephosphate isomerase	0.919374	15537.5	8212.67	1.21959e-24	GO:0003824; GO:0004807; GO:0006094; GO:0006096; GO:0006098; GO:0008152; GO:0016853
HmN_000693400	Syntaxin 1a	0.91724	384.953	202.98	3.06237e-06	GO:0000149; GO:0005484; GO:0005622; GO:0006886; GO:0016020; GO:0016021; GO:0016192; GO:0017157; GO:0061025
HmN_000328200	Otopetrin	0.912555	1144.48	609.087	1.00336e-19	GO:0016020; GO:0016021
HmN_000146300	Zinc finger protein 577	0.911752	581.463	308.63	1.03553e-07	GO:0003676; GO:0046872
HmN_000259600	n/a	0.911477	206.61	110.133	9.66235e-06	GO:0016020; GO:0016021
HmN_000223400	n/a	0.908419	354.12	188.183	1.80183e-07	GO:0016020; GO:0016021
HmN_002056600	n/a	0.90783	1854.81	987.53	2.49282e-21	n/a
HmN_002034500	n/a	0.907532	519.07	275.017	3.31796e-09	n/a
HmN_000437900	n/a	0.906096	1223.14	650.84	7.38418e-16	n/a
HmN_000032300	Universal stress protein	0.905521	5097.41	2715.84	2.06907e-06	GO:0006950
HmN_000296300	50S ribosomal protein L1	0.905459	598.697	318.763	1.20889e-15	GO:0005840
HmN_000792600	Beta tubulin	0.90515	341.823	182.68	9.41371e-11	GO:0000166; GO:0003924; GO:0005200; GO:0005525; GO:0005874; GO:0007017; GO:0008152
HmN_000076000	Leucine rich repeat containing protein 24	0.902543	1563.86	835.213	1.10899e-15	GO:0016020; GO:0016021; GO:0005515
HmN_000457300	n/a	0.901281	974.64	520.467	9.18693e-16	GO:0003779; GO:0005515
HmN_000285900	Ectonucleotide	0.89964	778.373	415.57	1.83675e-17	GO:0003824; GO:0008152; GO:0016020; GO:0016021
HmN_000188100	Expressed conserved protein	0.898882	2345.78	1255.61	8.96887e-24	GO:0016020; GO:0016021
HmN_000396900	Expressed conserved protein	0.895813	5832.81	3131.93	8.72165e-18	GO:0016020; GO:0016021
HmN_000576100	n/a	0.895327	1145.82	615.15	8.57024e-09	GO:0004672; GO:0006468; GO:0005524
HmN_000298700	Supervillin	0.895052	652.433	350.313	3.03411e-14	n/a
HmN_000683800	Myocyte enhancer factor 2 splice variant II	0.891448	1219.81	655.62	2.19794e-08	GO:0003677; GO:0005634; GO:0006351; GO:0006355; GO:0046983; GO:0000977; GO:0045944
HmN_000186300	n/a	0.891423	1252.13	673.117	7.26403e-11	GO:0005515; GO:0005509
HmN_000462000	Adenomatous polyposis coli protein 2	0.891413	1683.45	906.397	8.10084e-17	GO:0008013; GO:0016055; GO:0030178; GO:0005515; GO:0005488
HmN_000816400	Tyrosine-protein kinase	0.891041	750.793	404.197	1.38264e-14	GO:0000166; GO:0004672; GO:0004713; GO:0004715; GO:0005524; GO:0006468; GO:0016301; GO:0016310; GO:0016740; GO:0018108; GO:0005515
HmN_000290000	Lipase	0.889934	488.767	263.727	3.71629e-12	GO:0016042; GO:0016787; GO:0016788
HmN_000554300	n/a	0.889481	463.257	248.697	8.73775e-10	n/a
HmN_000312000	Long chain fatty acid coenzyme A ligase 5	0.889206	7466.25	4028.02	1.89414e-13	GO:0003824; GO:0008152; GO:0016020; GO:0016021; GO:0016874
HmN_000441600	WD40 repeat containing protein	0.888508	899.913	486.65	1.49356e-19	GO:0005515
HmN_000100100	RNA binding protein fox 1 3	0.88411	2288.88	1238.59	7.93421e-24	GO:0000166; GO:0003676; GO:0003723
HmN_000777800	Y+l amino acid transporter 2	0.884054	2527.2	1366.78	1.6296e-13	GO:0003333; GO:0015171; GO:0016020; GO:0016021; GO:0022857; GO:0055085
HmN_000621700	Expressed protein	0.882053	364.55	196.477	1.1945e-06	n/a
HmN_000367400	Cytoplasmic tRNA 2-thiolation protein 2	0.880046	784.257	427.08	2.46345e-11	GO:0000049; GO:0002098; GO:0005737; GO:0008033; GO:0016779; GO:0032447; GO:0034227
HmN_000600300	Sugar phosphate exchanger	0.879706	670.057	362.853	5.66519e-08	GO:0005215; GO:0006810; GO:0016020; GO:0016021; GO:0055085; GO:0022857
HmN_000972900	PQ loop repeat containing protein 2	0.878013	698.23	378.127	1.10144e-07	GO:0016020; GO:0016021
HmN_000143200	Gag pol polyprotein	0.877621	1311.3	713.657	7.81603e-15	n/a
HmN_000917000	Heat shock protein 70	0.875883	10880.8	5924.23	1.28743e-14	GO:0000166; GO:0005524; GO:0006457; GO:0051082
HmN_000254800	cAMP dependent protein kinase catalytic subunit	0.8747	2398.27	1307.27	2.42976e-20	GO:0000166; GO:0004672; GO:0004674; GO:0005524; GO:0006468; GO:0016301; GO:0016310; GO:0016740
HmN_002140200	n/a	0.874588	897.437	489.743	1.22036e-08	n/a
HmN_000776400	KH domain containing, RNA binding, signal	0.873118	2890.41	1577.46	1.01193e-17	GO:0003676; GO:0003723
HmN_000833600	Guanine nucleotide binding protein subunit	0.872966	567.167	309.267	2.82415e-11	GO:0007165; GO:0005515
HmN_000314300	n/a	0.869628	982.28	536.55	2.88158e-13	GO:0016849; GO:0009190; GO:0035556
HmN_000071300	Cytochrome P450	0.86753	386.57	210.543	2.19845e-07	GO:0005506; GO:0016020; GO:0016021; GO:0016705; GO:0020037; GO:0055114
HmN_000204800	Hepatic leukemia factor	0.864645	1321	724.99	9.63228e-26	GO:0003700; GO:0006355; GO:0043565
HmN_000091100	X prolyl aminopeptidase	0.863222	291.957	159.923	9.79601e-06	GO:0004177; GO:0006508
HmN_000530400	Protein-tyrosine-phosphatase	0.860327	527.657	289.487	5.17162e-08	GO:0004721; GO:0004725; GO:0006470; GO:0016020; GO:0016021; GO:0016311; GO:0016787; GO:0016791; GO:0035335; GO:0005515
HmN_000463000	Ubiquinol cytochrome c reductase complex	0.858228	522.79	288.003	2.06253e-09	n/a
HmN_000408600	Expressed conserved protein	0.854952	819.777	453.867	1.54145e-18	n/a
HmN_000528000	n/a	0.852625	668.407	368.997	4.37845e-13	n/a
HmN_000234800	Rab3	0.852233	1177.85	650.313	2.86033e-15	GO:0000166; GO:0003924; GO:0005525; GO:0005622; GO:0006886; GO:0006913; GO:0007165; GO:0007264; GO:0008152; GO:0015031; GO:0016020
HmN_000168400	Prenylcysteine oxidase	0.851875	942.987	523.323	4.98391e-20	GO:0001735; GO:0016491; GO:0016670; GO:0030328; GO:0055114
HmN_000031400	Surface protein PspC	0.850265	1746.86	968.073	3.45192e-25	n/a
HmN_000329300	Expressed conserved protein	0.849094	461.227	255.697	7.93146e-06	n/a
HmN_000185600	Protocadherin 1	0.848472	582.69	322.147	5.31067e-07	GO:0005509; GO:0005886; GO:0007155; GO:0007156; GO:0016020; GO:0016021
HmN_000762000	Forkhead box protein P4	0.845755	1181.53	656.623	2.44419e-13	GO:0003677; GO:0003700; GO:0005634; GO:0006351; GO:0006355; GO:0043565
HmN_000594600	Fras1 related extracellular matrix protein	0.844103	568.97	316.12	3.64606e-10	GO:0016020; GO:0016021
HmN_000788100	PDZ and LIM domain protein Zasp	0.841931	2504.63	1395.84	5.461e-17	GO:0005515
HmN_000353200	Delta-aminolevulinic acid dehydratase	0.840953	582.4	325.807	2.54938e-07	GO:0003824; GO:0004655; GO:0006779; GO:0016829; GO:0033014; GO:0046872
HmN_000403600	Expressed conserved protein	0.83998	1441.12	804.713	1.91612e-15	n/a
HmN_000987820	n/a	0.836185	445.803	249.717	6.63464e-08	n/a
HmN_000931600	n/a	0.835542	1979.34	1109.33	1.29421e-17	n/a
HmN_000063300	Ribose 5 phosphate isomerase	0.835126	6839.39	3830.43	5.0189e-11	GO:0004751; GO:0009052; GO:0016853
HmN_000225400	Adenosylhomocysteinase	0.834554	5364.39	3005.97	3.92256e-24	GO:0004013; GO:0006730; GO:0016787; GO:0051287; GO:0019510
HmN_000339100	n/a	0.833668	589.93	331.923	3.75513e-11	n/a
HmN_000021500	FERM and pleckstrin domain containing protein	0.833127	443.913	248.97	1.54523e-06	GO:0005089; GO:0005856; GO:0035023; GO:0043547
HmN_002038400	n/a	0.8292	1796.44	1009.85	1.0809e-08	GO:0005515
HmN_000395600	Nuclear receptor 2DBD gamma	0.829198	800.173	449	3.20603e-10	GO:0003677; GO:0003700; GO:0005634; GO:0006351; GO:0006355; GO:0008270; GO:0043401; GO:0043565; GO:0046872
HmN_000102100	60S ribosomal protein L21	0.827295	1348.57	759.927	1.92121e-20	GO:0004553; GO:0004563; GO:0005840; GO:0005975; GO:0016020; GO:0016021
HmN_000550300	Axis inhibition protein axin	0.825342	3410.27	1922.24	3.84714e-11	n/a
HmN_000236000	Synaptic vesicle membrane protein VAT 1	0.824429	1235.26	696.86	9.21385e-17	GO:0008270; GO:0016491; GO:0055114
HmN_000650800	Unc 13 (Munc13)	0.824312	508.9	287.11	1.56631e-11	GO:0005622; GO:0007268; GO:0019992; GO:0035556; GO:0046872; GO:0005509; GO:0005543
HmN_000727700	Smad4	0.824002	435.337	245.933	1.7012e-07	GO:0005622; GO:0006355; GO:0005515
HmN_002155200	n/a	0.819368	608.593	345.003	4.15387e-13	GO:0005515
HmN_000526700	Mitochondrial uncoupling protein	0.818924	546.503	310.11	7.22262e-09	GO:0006810; GO:0016020; GO:0016021
HmN_000213100	Kinesin protein kif3b	0.818339	3806.79	2155.06	3.36856e-10	GO:0003774; GO:0008152; GO:0016459
HmN_000777900	Protein Mpv17	0.818039	725.31	410.783	1.80714e-17	GO:0016020; GO:0016021
HmN_000206500	O phosphoseryl tRNA(Sec) selenium	0.816229	830.15	471.947	2.17099e-08	GO:0003824; GO:0016740; GO:0016785; GO:0097056
HmN_000844700	Complement component 1 Q subcomponent binding	0.816045	3343.2	1897.29	1.04492e-10	GO:0005759
HmN_000283300	Expressed conserved protein	0.810088	2274.42	1296.48	7.76202e-07	GO:0016020; GO:0016021
HmN_000158300	PLC phosphodiesterase, TIM beta alpha barrel domain	0.807321	317.147	182.063	4.31504e-07	GO:0006629; GO:0008081
HmN_000103400	FAD dependent oxidoreductase domain containing protein	0.806995	796.023	453.88	1.16316e-12	GO:0016491; GO:0055114
HmN_002102500	n/a	0.805394	487.75	278.047	4.13939e-08	GO:0004672; GO:0005524; GO:0006468
HmN_000167600	Glypican	0.803606	3786.19	2166	5.72426e-07	GO:0005578; GO:0016020; GO:0016021; GO:0043395; GO:0009966; GO:0046658
HmN_000161500	Calcium-transporting ATPase	0.803299	9354.89	5353.08	2.19809e-06	GO:0000166; GO:0005388; GO:0005524; GO:0006810; GO:0006811; GO:0006816; GO:0008152; GO:0016020; GO:0016021; GO:0016787; GO:0046872; GO:0070588
HmN_000002500	n/a	0.802466	1042.65	597.743	1.00903e-07	n/a
HmN_000876700	Carbonic anhydrase 2	0.79974	1622.37	933.11	2.26837e-14	GO:0004089; GO:0006730; GO:0008270; GO:0046872
HmN_002147600	n/a	0.799647	82495.8	47353.9	1.72442e-08	GO:0005515
HmN_000673100	Cell adhesion molecule:down regulated by	0.799115	492.357	281.573	7.84598e-09	GO:0016020; GO:0016021; GO:0005515
HmN_000931100	Adenylosuccinate synthetase	0.797639	18224.4	10478	4.18843e-12	GO:0000166; GO:0004019; GO:0005525; GO:0006164; GO:0016874; GO:0044208; GO:0046872
HmN_000164200	High voltage activated calcium channel beta	0.797588	404.37	232.657	6.11859e-10	GO:0005245; GO:0005891; GO:0070588; GO:0005515
HmN_000100700	n/a	0.797065	1003	577.15	3.5022e-17	GO:0005215; GO:0016020; GO:0016021; GO:0022857; GO:0055085
HmN_002192900	n/a	0.793168	28142.6	16231	3.26325e-12	GO:0004347; GO:0006096; GO:0006094
HmN_000203000	Diphthamide biosynthesis protein 2	0.792171	576.04	331.71	1.39017e-09	GO:0017183
HmN_000733200	MEChanosensory abnormality family member	0.79177	455.987	263.557	3.29456e-09	GO:0016020
HmN_000403000	Expressed conserved protein	0.791751	2861.95	1652.49	4.34717e-19	n/a
HmN_000861100	Immunoglobulin	0.791082	216.067	124.623	5.04743e-06	GO:0016020; GO:0016021
HmN_000685900	Lysosomal Pro X carboxypeptidase	0.790951	551.473	318.39	7.77107e-06	GO:0004180; GO:0006508; GO:0008236
HmN_002180500	n/a	0.78857	5947.74	3440.85	3.06159e-25	GO:0003924; GO:0007017; GO:0005874; GO:0005200; GO:0005525
HmN_000581600	Transmembrane emp24 domain containing protein	0.787041	3949.08	2287.38	6.91381e-14	GO:0006810; GO:0016020; GO:0016021
HmN_000975900	Ski oncogene	0.786979	1956.01	1131.91	1.48099e-07	GO:0046332
HmN_000188600	Fanconi associated nuclease 1	0.785531	509.55	295.657	1.77832e-08	GO:0008152; GO:0016788; GO:0004518; GO:0036297
HmN_000538900	Pdz domain containing protein	0.781964	1275.58	740.2	2.86197e-14	GO:0005515
HmN_000850900	Long chain fatty acid transport protein 4	0.781819	4828.88	2808.74	1.367e-18	GO:0003824; GO:0008152
HmN_000808200	WD repeat containing, antisense to TP53	0.781814	963.42	561.503	2.78248e-13	GO:0005515
HmN_000190700	Protein FAM116A	0.779949	544.227	316.727	7.95299e-10	GO:0017112
HmN_000375900	Ribosomal protein L15	0.778312	12752.9	7430.27	3.36717e-08	GO:0003735; GO:0005622; GO:0005840; GO:0006412; GO:0030529
HmN_000802800	1-acyl-sn-glycerol-3-phosphate acyltransferase	0.777583	511.547	298.917	1.29249e-10	GO:0003841; GO:0006629; GO:0008152; GO:0008654; GO:0016020; GO:0016740; GO:0016746
HmN_002128300	n/a	0.776922	662.443	386.02	1.38292e-09	GO:0005515
HmN_000414300	Elongation factor 1 delta	0.776391	7069.69	4125.34	7.51286e-10	GO:0003746; GO:0005853; GO:0006414
HmN_000408500	Heat shock protein 75 kDa, mitochondrial	0.776149	1802.32	1050	5.43212e-06	GO:0005524; GO:0006457; GO:0006950; GO:0051082
HmN_000537500	Ras gtp binding protein rho1	0.776098	2067	1206.32	7.13946e-23	GO:0000166; GO:0003924; GO:0005525; GO:0005622; GO:0006886; GO:0006913; GO:0007165; GO:0007264; GO:0008152; GO:0015031; GO:0016020
HmN_000664500	Voltage dependent anion selective channel	0.769319	5310.01	3114.12	1.05437e-11	GO:0005741; GO:0055085
HmN_000521300	tRNA (Guanine N(7)) methyltransferase subunit	0.767813	1068.05	626.237	7.86741e-07	GO:0008168; GO:0016740; GO:0032259; GO:0005515; GO:0036265
HmN_000058700	Biotin protein ligase	0.766912	917.5	538.77	3.51078e-11	GO:0004077; GO:0006464; GO:0016874
HmN_000253400	n/a	0.766862	603.287	352.96	1.46413e-10	GO:0016491
HmN_000080100	EVH1	0.764993	490.227	288.037	7.39121e-06	n/a
HmN_002195100	n/a	0.764482	800.217	471.293	1.12575e-11	n/a
HmN_000781700	Guanine nucleotide binding protein subunit	0.763488	2623.12	1542.21	2.18852e-07	GO:0007165; GO:0005515
HmN_002214100	n/a	0.762232	728.97	427.963	5.69102e-08	GO:0005515; GO:0072546
HmN_000652000	n/a	0.760345	511.157	300.99	2.58572e-09	GO:0016020; GO:0016021
HmN_000406900	Major egg antigen (P40)	0.759625	846.533	498.9	4.93195e-16	n/a
HmN_000461400	Myosin light chain kinase, smooth muscle	0.755596	1473.5	871.17	5.30038e-13	GO:0000166; GO:0004672; GO:0005524; GO:0006468; GO:0016301; GO:0016310
HmN_000584500	n/a	0.755394	43279.8	25631	2.99043e-22	GO:0003924; GO:0007017; GO:0005874; GO:0005200; GO:0005525
HmN_000462800	Gag pol polyprotein	0.754534	3404.32	2016.97	1.84107e-06	GO:0016020; GO:0016021
HmN_002159700	n/a	0.753956	4365.55	2588.9	1.63421e-13	n/a
HmN_000839200	ATP synthase subunit alpha	0.753868	16017.2	9493.96	5.28515e-18	GO:0000166; GO:0005524; GO:0006754; GO:0006810; GO:0006811; GO:0015986; GO:0015991; GO:0015992; GO:0016820; GO:0033178; GO:0045261; GO:0046034; GO:0046933; GO:0046961; GO:0032559
HmN_002116800	n/a	0.7524	660.567	392.603	2.25023e-09	GO:0004177; GO:0030145
HmN_000088600	Isocitrate dehydrogenase (NAD+)	0.751928	2171.34	1288.09	1.01246e-13	GO:0000287; GO:0004449; GO:0006099; GO:0016616; GO:0051287; GO:0055114
HmN_002018500	n/a	0.751558	255.857	151.193	9.59382e-06	GO:0055085
HmN_000987840	Nedd8 conjugating enzyme ubc12	0.749917	353.29	210.563	7.6259e-07	GO:0008152; GO:0016874
HmN_000148300	Zinc finger protein 45	0.749658	974.357	577.963	6.17316e-13	GO:0003676; GO:0046872
HmN_000156200	n/a	0.7471	327.367	194.827	1.55279e-06	GO:0005515
HmN_000042700	Dual specificity	0.746794	1892.43	1126.78	8.94306e-17	GO:0000166; GO:0004672; GO:0005524; GO:0006468
HmN_000355300	UDP glucuronic acid decarboxylase 1	0.746342	539.523	321.54	1.49007e-10	n/a
HmN_000518800	Expressed conserved protein	0.745976	643	382.41	1.16728e-08	n/a
HmN_000697300	Nervana 2	0.744773	25230.6	15053.8	2.07181e-27	GO:0005890; GO:0006813; GO:0006814; GO:0016020; GO:0016021
HmN_000385800	Zinc finger, C2H2 type	0.744763	1658.94	990.88	2.79047e-17	GO:0003676; GO:0046872
HmN_000223700	n/a	0.743414	945.997	564.077	6.94861e-13	GO:0004672; GO:0006468; GO:0005524; GO:0004713
HmN_000168600	Peptidase Clp (S14 family)	0.743299	708.527	423.817	4.96644e-09	GO:0003779; GO:0007155; GO:0016020; GO:0016021; GO:0031532; GO:0005515
HmN_000003200	n/a	0.738716	2341.82	1403.33	5.63679e-15	GO:0004129; GO:0005740
HmN_000425200	Mitochondrial processing peptidase beta subunit	0.736126	4436.17	2662.5	2.6404e-18	GO:0003824; GO:0004222; GO:0006508; GO:0046872
HmN_000382000	Diphosphomevalonate decarboxylase	0.735086	548.533	328.503	1.8834e-07	GO:0004163; GO:0005524; GO:0005829; GO:0008299; GO:0016831; GO:0019287
HmN_000826800	Tetraspanin 74f	0.734842	479.39	287.83	1.52959e-09	GO:0016021
HmN_000602100	Procollagen lysine,2 oxoglutarate 5 dioxygenase	0.733352	726.093	435.02	4.10029e-07	GO:0005506; GO:0016491; GO:0016705; GO:0031418; GO:0051213; GO:0055114
HmN_000317000	Fructose 1,6 bisphosphatase 1	0.7308	900.667	542.79	3.08465e-12	GO:0005975; GO:0016311; GO:0016787; GO:0042132; GO:0042578; GO:0016791
HmN_000057100	ATP binding cassette sub family A	0.729531	2241.03	1350.84	4.01251e-14	GO:0000166; GO:0005215; GO:0005524; GO:0006810; GO:0008152; GO:0016020; GO:0016021; GO:0016887; GO:0042626; GO:0055085
HmN_002087300	n/a	0.726294	977.687	589.123	3.02559e-08	GO:0005085; GO:0007264
HmN_000611100	Neutral sphingomyelinase	0.724797	434.673	264.037	3.22913e-07	GO:0016020; GO:0016021
HmN_000180300	Copper amine oxidase	0.72476	654.377	395.307	5.36433e-12	n/a
HmN_000732800	AMME syndrome candidate gene 1 protein	0.724704	2910.98	1762.54	1.42646e-18	n/a
HmN_000109000	Polypeptide N acetylgalactosaminyltransferase 14	0.724402	1497.6	905.603	2.28584e-22	GO:0008152; GO:0016740
HmN_000676800	Vang-like protein 1	0.723844	730.993	442.413	2.63296e-14	GO:0007275; GO:0016020; GO:0016021
HmN_000588100	Arf GAP and Pleckstrin domain containing protein	0.723463	576.91	349.627	2.4251e-09	GO:0005096; GO:0043547
HmN_000879000	Fascin 2	0.723288	6585.29	3986.4	3.48712e-12	GO:0007015; GO:0030674; GO:0051015
HmN_000042900	Zinc finger, LIM type	0.720946	5086.63	3084.84	3.20605e-19	GO:0008270; GO:0046872
HmN_000987200	Universal stress protein in QAH:OAS	0.719561	665.93	402.633	1.42293e-06	GO:0006950
HmN_002164400	n/a	0.718153	1891.54	1148.02	1.65259e-08	GO:0016491; GO:0050660; GO:0055114
HmN_000321000	Lysosomal protein NCU G1 B	0.717862	1356.11	823.52	8.10605e-14	GO:0016020; GO:0016021
HmN_000470800	Histone H2A	0.714154	1567.26	954.47	7.10041e-08	GO:0000786; GO:0003677; GO:0005634; GO:0005694; GO:0046982
HmN_002211300	n/a	0.713209	17617.4	10736.1	8.55797e-06	GO:0005515; GO:0003735; GO:0006412; GO:0005622; GO:0005840
HmN_002147500	n/a	0.712828	1199.01	730.79	6.93458e-07	GO:0005515
HmN_000215000	Protocadherin 11	0.711915	1527.64	932.6	7.54615e-07	GO:0003700; GO:0006355; GO:0043565
HmN_000267100	n/a	0.711738	711.04	435.46	3.61575e-11	GO:0004725; GO:0006470; GO:0016311; GO:0016791
HmN_000462700	Expressed protein	0.711342	2332.6	1423.14	7.16562e-09	GO:0008270; GO:0016491; GO:0055114
HmN_000730500	Expressed conserved protein	0.707239	2486.77	1520.83	2.70207e-09	n/a
HmN_000003600	Glutamate synthase	0.704135	1091.53	667.9	4.88443e-11	GO:0003824; GO:0006537; GO:0006807; GO:0008152; GO:0015930; GO:0016491; GO:0016638; GO:0016639; GO:0051536; GO:0055114; GO:0005506; GO:0010181; GO:0016040; GO:0045181; GO:0050660
HmN_002129800	n/a	0.703674	6495.99	3987.17	7.66566e-20	n/a
HmN_000380300	p30 dbc protein	0.703564	6084.79	3734.08	5.23593e-11	GO:0006355
HmN_000450200	Tyrosine-protein kinase	0.695771	1086.37	668.913	1.23472e-10	GO:0000166; GO:0004672; GO:0004713; GO:0004715; GO:0005524; GO:0006468; GO:0016301; GO:0016310; GO:0016740; GO:0018108; GO:0005515
HmN_000678700	Ankyrin	0.694882	641.18	395.79	5.26417e-09	GO:0005515
HmN_000017100	Discoidin domain receptor	0.693264	968.157	597.64	4.36056e-07	GO:0016020; GO:0016021
HmN_000626100	Alkylated dna repair protein alkb 8	0.693012	775.64	479.33	4.50474e-06	GO:0008152; GO:0008168; GO:0032259; GO:0016300; GO:0002098; GO:0030488
HmN_000251200	Xylosyltransferase	0.692344	419.163	258.99	6.77896e-06	GO:0008152; GO:0008375; GO:0016020; GO:0016740
HmN_002221500	n/a	0.691647	2817.45	1742.85	1.46922e-07	GO:0000049; GO:0004812; GO:0005524; GO:0043039; GO:0005737; GO:0000166; GO:0004826; GO:0006432
HmN_002004400	n/a	0.690089	13627.5	8443.9	3.28985e-19	GO:0051015
HmN_000627100	n/a	0.689637	4374.97	2709.18	5.89942e-07	GO:0005515
HmN_000431900	Expressed protein	0.689512	2421.5	1501.04	6.49808e-06	GO:0016020; GO:0016021
HmN_000452600	n/a	0.688461	2104.28	1303.76	1.96094e-12	n/a
HmN_000156000	Mitochondrial import receptor subunit tom40	0.688295	1051.7	650.7	3.50721e-11	GO:0005741; GO:0055085
HmN_000727100	Lysyl oxidase	0.688231	4539.61	2814.65	1.94608e-08	GO:0005044; GO:0005507; GO:0006898; GO:0016020; GO:0016641; GO:0055114
HmN_000269400	n/a	0.688124	6454.37	4007	1.49894e-12	n/a
HmN_002254100	n/a	0.687703	934.273	580.433	2.26803e-15	n/a
HmN_000466000	n/a	0.687547	2257.18	1400.4	3.81158e-08	n/a
HmN_000482400	Suppressor of fused	0.687425	1701.33	1054.48	7.41683e-06	GO:0005515
HmN_000795600	n/a	0.685048	2112.9	1311.86	2.52486e-07	GO:0006820; GO:0016021; GO:0008509; GO:0005452; GO:0016020
HmN_000746200	Transducin beta protein 3	0.683077	731.9	455.34	1.11075e-11	GO:0006364; GO:0032040; GO:0005515
HmN_000762800	Acetyltransferase component of pyruvate dehydrogenase complex	0.682949	3877.22	2414.58	1.87846e-14	GO:0004742; GO:0005759; GO:0006090; GO:0008152; GO:0016740; GO:0016746; GO:0045254
HmN_000259900	DNA methylase, C 5 cytosine specific, active site	0.682519	1429.97	890.46	7.10992e-10	GO:0008168; GO:0032259
HmN_002209700	n/a	0.682025	583.91	363.483	1.27113e-06	GO:0003723; GO:0033897
HmN_000030100	Nucleolar protein 5	0.68101	1388.64	865.53	1.35629e-10	n/a
HmN_000451200	Lymphocyte antigen 75	0.680432	1378.74	858.513	3.3951e-08	GO:0016020; GO:0016021
HmN_000064300	5-aminolevulinate synthase	0.67932	462.19	287.993	1.09936e-06	GO:0003824; GO:0003870; GO:0005739; GO:0005759; GO:0006782; GO:0006783; GO:0008152; GO:0009058; GO:0016740; GO:0016746; GO:0030170; GO:0033014
HmN_000431300	Three prime repair exonuclease 1	0.679286	472.077	295.4	1.2503e-06	GO:0003676; GO:0004527; GO:0090305
HmN_000447800	Succinate dehydrogenase	0.678322	31951.8	19959.5	3.19149e-15	GO:0005743; GO:0006099; GO:0008177; GO:0016020; GO:0016491; GO:0016627; GO:0022900; GO:0050660; GO:0055114
HmN_000569500	Sodium/hydrogen exchanger	0.676312	2607.21	1630.39	1.73924e-09	GO:0006810; GO:0006811; GO:0006812; GO:0006814; GO:0006885; GO:0015297; GO:0015299; GO:0015385; GO:0016020; GO:0016021; GO:0035725; GO:0055085; GO:1902600
HmN_000290100	Mariner Mos1 transposase	0.675642	646.74	405.033	3.45287e-10	GO:0005515
HmN_000268600	Slit 1 protein	0.672431	2771.33	1738.12	1.51934e-06	GO:0016020; GO:0016021; GO:0005515
HmN_000630900	SET and MYND domain containing protein 4	0.672272	2945.1	1848.12	2.24334e-17	GO:0005515
HmN_000289600	Expressed protein	0.671989	771.33	483.467	9.14729e-07	n/a
HmN_002198500	n/a	0.671744	1154.1	722.833	7.16616e-10	GO:0016857; GO:0006024; GO:0016021
HmN_000030900	Ef hand family protein	0.671366	12713.3	7977.06	2.38065e-06	GO:0005509
HmN_000012500	Aldehyde dehydrogenase	0.669478	4439.57	2789.58	5.34012e-13	GO:0004030; GO:0006081; GO:0008152; GO:0016491; GO:0016620; GO:0055114
HmN_000091600	Retinol dehydrogenase 11	0.668825	1102.37	692.827	1.21985e-14	GO:0008152; GO:0016491; GO:0055114
HmN_000530600	F box only protein 7	0.667624	809.123	509.213	4.14347e-13	GO:0005515
HmN_000248900	n/a	0.667488	1157.98	727.037	1.36046e-06	n/a
HmN_000839100	NADH dehydrogenase (Ubiquinone) Fe S protein 2	0.667118	2107.08	1326.16	3.9918e-09	GO:0016491; GO:0016651; GO:0048038; GO:0051287; GO:0055114
HmN_000712300	Nodal modulator 1	0.666828	2421.33	1523.38	3.60124e-08	n/a
HmN_000613000	n/a	0.665006	1779.47	1122.27	6.88666e-10	n/a
HmN_000605000	Oligopeptidase	0.664938	1864.9	1175.43	3.97303e-09	GO:0004222; GO:0006508; GO:0008233; GO:0008237; GO:0016787; GO:0046872
HmN_000273200	T cell transcription factor 4 long C terminal	0.663645	1180.79	743.707	2.43741e-07	GO:0016055
HmN_000404600	Methyltransferase protein 13	0.662703	878.873	554.36	7.15028e-08	GO:0008168; GO:0016740; GO:0032259
HmN_000719400	ATP synthase subunit beta	0.662054	16402.2	10362.6	1.33095e-16	GO:0000166; GO:0005524; GO:0006754; GO:0006810; GO:0006811; GO:0015986; GO:0015991; GO:0015992; GO:0016820; GO:0033178; GO:0045261; GO:0046034; GO:0046933
HmN_000549700	Elongation factor Ts	0.661796	1374.46	869.593	2.39897e-12	GO:0003746; GO:0005622; GO:0006414; GO:0005515
HmN_002220400	n/a	0.661546	45519.4	28763.1	6.13045e-09	GO:0000166; GO:0005391; GO:0005524; GO:0006813; GO:0006814; GO:0016021
HmN_000424800	Adenylate kinase	0.661387	5578.5	3525.36	7.82525e-11	GO:0005524; GO:0006139; GO:0016301; GO:0016310; GO:0016740; GO:0019205
HmN_000002800	n/a	0.66086	809.767	512.357	5.1778e-06	GO:0003735; GO:0006412; GO:0005840
HmN_000462600	Zinc binding dehydrogenase	0.660261	1339.2	846.98	3.80448e-07	GO:0008270; GO:0016491; GO:0055114
HmN_000172000	RNA:RNP complex 1 interacting phosphatase	0.660089	1125.28	711.913	2.72652e-07	GO:0004725; GO:0006470; GO:0008138; GO:0016311; GO:0016787; GO:0016791; GO:0035335
HmN_000933000	Expressed conserved protein	0.659327	1341.06	849.227	2.55258e-07	GO:0016020; GO:0016021
HmN_000813900	n/a	0.65927	11427.3	7232.27	8.23625e-10	GO:0005319; GO:0006869
HmN_000960900	n/a	0.658113	447.013	283.427	7.31062e-06	n/a
HmN_000587100	Cysteine desulfurase, mitochondrial	0.654455	1370.08	870.18	1.22562e-10	GO:0003824; GO:0030170; GO:0031071; GO:0044571
HmN_000798300	Monocarboxylate transporter	0.653724	1119.86	710.363	1.61174e-11	GO:0016020; GO:0016021; GO:0055085
HmN_000509500	Expressed conserved protein	0.653238	2350.88	1492.75	3.88733e-06	n/a
HmN_000221000	Cell division cycle protein 123	0.652418	470.23	299.703	5.44766e-07	GO:0007049; GO:0051301
HmN_000314200	Gag pol polyprotein	0.650899	1279.3	812.463	2.32279e-07	GO:0003824; GO:0009058; GO:0030170
HmN_000912200	Dna repair protein rad51 1	0.650734	5370.74	3419.01	8.44046e-10	GO:0003677; GO:0005524; GO:0006259; GO:0008094
HmN_000472200	n/a	0.650624	2126.08	1352.4	1.95713e-06	GO:0004672; GO:0005524; GO:0006468
HmN_000214800	Anoctamin	0.650356	2583.3	1643.99	9.02697e-10	GO:0016020; GO:0016021
HmN_000322500	F8A1-like protein	0.649879	1186.79	756.97	8.48026e-07	GO:0005515
HmN_000611400	NADH ubiquinone oxidoreductase sgdh subunit	0.649133	1265.17	805.507	7.10875e-07	n/a
HmN_000692300	Lysine specific histone demethylase 1A	0.647647	1161.41	739.327	1.28528e-11	GO:0008168; GO:0016491; GO:0032259; GO:0055114
HmN_000113300	Inhibitor of apoptosis protein	0.646942	4734.27	3022.12	9.20508e-09	n/a
HmN_000435000	UDP glucuronic acid:UDP N acetylgalactosamine	0.646878	572.983	366.097	1.70193e-07	GO:0016020; GO:0016021
HmN_000448000	Hemicentin 1	0.646495	5202.1	3320.14	2.28292e-08	GO:0005509
HmN_000622300	n/a	0.646474	691.897	441.66	8.29806e-07	GO:0005515
HmN_000487200	XK-related protein	0.646372	617.803	395.21	4.78251e-08	GO:0016020; GO:0016021
HmN_000858600	Tbc (Tre 2:bub2:cdc16) domain family member	0.644321	1070.37	683.733	9.00423e-11	GO:0005515
HmN_000344700	Farnesyl pyrophosphate synthase	0.644089	1377.62	882.493	5.7442e-12	GO:0008299; GO:0016740
HmN_000355800	Hexaprenyldihydroxybenzoate methyltransferase	0.643342	631.843	403.79	8.00901e-08	GO:0006744; GO:0008168; GO:0008425; GO:0016740; GO:0032259
HmN_000892600	Syntaxin binding protein 1	0.643222	1456.07	930.64	3.37206e-11	GO:0005623; GO:0006904; GO:0016192
HmN_000629100	4 nitrophenylphosphatase	0.642744	1839.25	1179.49	5.16171e-11	GO:0008152; GO:0016311; GO:0016791
HmN_002127400	Expressed conserved protein	0.642497	2249.18	1438.93	1.55776e-10	n/a
HmN_000531500	ATP-dependent 6-phosphofructokinase	0.639656	7639.03	4899.22	7.5305e-08	GO:0000166; GO:0003824; GO:0003872; GO:0005524; GO:0005737; GO:0006002; GO:0006096; GO:0008152; GO:0016301; GO:0016310; GO:0016740; GO:0046872; GO:0061615
HmN_000190900	Dedicator of cytokinesis protein	0.639392	480.697	308.167	5.14262e-06	GO:0005085; GO:0005622; GO:0007264; GO:0043547
HmN_000295100	GST class mu	0.634402	24579	15832.2	1.85046e-22	GO:0005515
HmN_000678600	Centromere protein s	0.633848	573.167	369.677	3.32314e-06	GO:0046982; GO:0071821
HmN_000528100	n/a	0.633152	629.67	404.98	6.4206e-09	n/a
HmN_000787000	Palmitoyltransferase	0.630824	413.503	266.397	9.63506e-07	GO:0008152; GO:0008270; GO:0016020; GO:0016021; GO:0016740; GO:0016746; GO:0019706; GO:0046872
HmN_000080900	Nuclear RNA export factor 1:2	0.630723	788.437	508.193	2.36634e-07	GO:0005634; GO:0051028; GO:0005515
HmN_000629000	n/a	0.629767	1929.49	1245.47	6.12453e-06	n/a
HmN_002105400	n/a	0.629704	20922.6	13518.9	1.02132e-12	GO:0003824; GO:0008152
HmN_000522000	Aldo keto reductase family 1, member B4	0.629048	1068.83	690.243	9.31271e-06	GO:0016491; GO:0055114
HmN_000293800	Rho guanine nucleotide exchange factor 7	0.628842	1150.11	743.383	1.48686e-12	GO:0005089; GO:0035023; GO:0043547; GO:0005515
HmN_000062900	Nicotinamide phosphoribosyltransferase	0.628347	2000.17	1292.39	4.31698e-06	GO:0004514; GO:0009435; GO:0016740; GO:0016757
HmN_000838200	GDP mannose 4,6 dehydratase	0.625932	13931.9	9027.91	2.17314e-13	GO:0008446; GO:0019673
HmN_000343100	GTP binding domain protein	0.624573	1002.63	648.36	5.19996e-07	GO:0005525
HmN_002219600	n/a	0.623935	1640.81	1063	1.47568e-10	n/a
HmN_000817600	Zinc finger, RING type	0.622692	1770.18	1147.45	5.01715e-14	GO:0004518; GO:0008270; GO:0034477; GO:0046872; GO:0090305; GO:0005515
HmN_000393000	Caspase 3, apoptosis cysteine peptidase	0.622529	1189.83	771.243	4.48696e-12	GO:0004197; GO:0006508; GO:0006915; GO:0008233; GO:0008234; GO:0016787
HmN_002235800	n/a	0.620092	1504.69	977.667	3.90632e-09	GO:0003735; GO:0006412; GO:0005622; GO:0005840
HmN_000513100	Catenin alpha 1	0.617998	530.573	346.027	2.45562e-06	GO:0007155; GO:0045296; GO:0051015
HmN_000534200	TWiK family of potassium channels protein 7	0.616293	642	417.663	2.3747e-07	GO:0005267; GO:0006810; GO:0006811; GO:0016020; GO:0016021; GO:0071805
HmN_000455700	39S ribosomal protein L19	0.616038	522.457	340.923	6.69829e-06	GO:0003735; GO:0005622; GO:0005840; GO:0006412
HmN_000539600	Acetyl-coenzyme A synthetase	0.614818	2298.26	1498.94	5.15038e-06	GO:0000166; GO:0003824; GO:0003987; GO:0005524; GO:0008152; GO:0016208; GO:0016874; GO:0019427
HmN_000341800	Ubiquitin specific peptidase 30 (C19 family)	0.613945	2502.47	1634.85	3.35171e-10	GO:0006511; GO:0016020; GO:0016021; GO:0016579; GO:0036459
HmN_000658500	NADH dehydrogenase (Ubiquinone) flavoprotein 1	0.61337	6269.77	4097.38	1.8011e-23	GO:0008137; GO:0010181; GO:0016651; GO:0051287; GO:0051539; GO:0055114
HmN_000205200	Rhophilin 2	0.611622	631.017	411.887	7.34302e-06	GO:0005515
HmN_000786800	Beta galactosidase	0.610836	2179.81	1427.94	3.72797e-13	GO:0004553; GO:0004565; GO:0005975; GO:0008152; GO:0016787; GO:0016798
HmN_000121000	Lamin dm0	0.608126	1550.77	1015.89	6.502e-09	GO:0005198; GO:0005882
HmN_002198400	n/a	0.606669	1454.03	955.877	2.19147e-14	n/a
HmN_000340000	n/a	0.606634	2391.59	1568.55	4.60332e-08	n/a
HmN_000102600	Dynein intermediate chain	0.606632	571.11	374.657	3.55863e-06	GO:0005515
HmN_000532000	Muscleblind protein	0.605164	1088.62	714.72	7.63319e-07	GO:0046872
HmN_000402800	Expressed protein	0.604048	1340.59	881.123	7.31086e-12	n/a
HmN_000705000	ELAV protein 2	0.603681	731.387	479.8	1.60025e-06	GO:0000166; GO:0003676; GO:0003723
HmN_000130900	Deoxyribose phosphate aldolase	0.602598	3803.91	2504.94	2.91874e-10	GO:0003824; GO:0004139; GO:0005737; GO:0009264; GO:0016829
HmN_000525600	Gynecophoral canal protein	0.601476	17717.2	11674.3	3.16221e-16	n/a
HmN_000933200	n/a	0.601434	419.58	275.433	3.72269e-06	n/a
HmN_000510300	Tetraspanin	0.599275	4621.37	3050.45	1.5651e-09	GO:0016020; GO:0016021
HmN_000324400	Expressed protein	0.598013	1418.91	936.147	9.56072e-07	GO:0005509; GO:0016020; GO:0016021
HmN_000017000	Elongation factor Tu	0.597953	5994.19	3958.37	9.56212e-08	GO:0000166; GO:0003746; GO:0003924; GO:0005525; GO:0005622; GO:0006414
HmN_000132900	n/a	0.597443	4665.06	3080.4	2.45562e-06	GO:0004692; GO:0004672; GO:0005524; GO:0006468; GO:0004674
HmN_000625400	NADH dehydrogenase (Ubiquinone) flavoprotein 2	0.594325	1385.46	917.173	9.03588e-11	GO:0016491; GO:0046872; GO:0051536; GO:0051537; GO:0055114
HmN_000606600	Nuclear rna export factor 1	0.593806	1772	1173.02	5.47066e-06	GO:0005634; GO:0051028; GO:0005515
HmN_000879800	Heterogeneous nuclear ribonucleoprotein	0.592415	4163.27	2758.6	3.1376e-09	GO:0000166; GO:0003676; GO:0019013; GO:0030529
HmN_000415300	Asparagine rich antigen	0.589692	1143.15	757.777	2.73759e-08	n/a
HmN_000132300	Expressed protein	0.589645	1009.86	672.303	1.1604e-06	n/a
HmN_002152700	n/a	0.588505	3263.92	2168.94	8.84494e-07	GO:0005509
HmN_000703800	AFaDin (Actin filament binding protein)	0.586891	456.07	303.09	6.79928e-06	GO:0005515; GO:0005911
HmN_000427200	Phosphate carrier protein mitochondrial	0.586788	6700.7	4460.99	2.82229e-16	GO:0006810; GO:0016020; GO:0016021
HmN_000069200	n/a	0.586707	857.643	572.67	1.60549e-08	GO:0016020; GO:0016021
HmN_000546100	Beta arrestin 1	0.584966	886.737	589.23	3.27666e-09	GO:0007165
HmN_000188300	Caseinolytic peptidase B protein	0.584106	1059.81	708.1	1.68261e-11	GO:0000166; GO:0005524; GO:0005515
HmN_000383700	Tubulin beta 2C chain	0.583755	3278.03	2187.83	3.58532e-07	GO:0000166; GO:0003924; GO:0005200; GO:0005525; GO:0005737; GO:0005856; GO:0005874; GO:0007017; GO:0008152
HmN_000855100	Serine:threonine protein kinase RIO1	0.583432	1053.23	703.09	3.69066e-06	GO:0016301; GO:0016310; GO:0052855
HmN_000865100	Microtubule associated protein	0.583315	4864.74	3245.12	1.44369e-11	n/a
HmN_000648620	Metaxin-2	0.582976	857.007	570.72	7.91729e-06	GO:0006626; GO:0005741
HmN_000849800	Vacuolar fusion protein MON1 A	0.581786	479.183	319.527	7.6259e-07	n/a
HmN_000382400	EGF region	0.581534	1355.19	905.857	9.57191e-11	GO:0016020; GO:0016021
HmN_000664600	Expressed conserved protein	0.578024	1448.06	968.817	7.00778e-14	n/a
HmN_000560400	Transmembrane protein 161B	0.576734	1091.29	730.333	1.92829e-07	GO:0016020; GO:0016021
HmN_000667700	Propionyl coenzyme A carboxylase alpha chain	0.576552	1037.52	694.233	2.57098e-11	GO:0000166; GO:0003824; GO:0004075; GO:0005524; GO:0008152; GO:0016874; GO:0046872
HmN_000045800	Rab gdp dissociation inhibitor	0.573477	8181.23	5497.8	9.40638e-15	GO:0005093; GO:0015031; GO:0016491; GO:0050790; GO:0055114; GO:0005092; GO:0007264
HmN_000745400	NADH dehydrogenase (Ubiquinone) 1 alpha	0.573292	2881.04	1933.66	1.51317e-07	GO:0003824; GO:0008152; GO:0050662
HmN_000199800	Bystin	0.573045	1239.79	832.957	3.79983e-08	n/a
HmN_000401800	Leucine rich repeat containing protein (LRR)	0.572472	909.91	611.1	1.707e-06	GO:0006915; GO:0005634
HmN_000217600	n/a	0.567659	1325.18	893.007	6.30639e-06	n/a
HmN_000013000	Krueppel factor 5	0.567418	4101.45	2765.66	1.5666e-06	GO:0003676; GO:0046872
HmN_002213700	n/a	0.566378	1720.44	1161.8	1.76058e-10	GO:0005515; GO:0000278; GO:0051301
HmN_000679500	Cadherin EGF LAG seven pass G type receptor	0.566199	504.45	341.94	3.6211e-06	GO:0004888; GO:0004930; GO:0007166; GO:0007186; GO:0016020; GO:0016021
HmN_000392900	Cdk5 regulatory subunit associated protein 1	0.564555	597.01	404.013	6.71126e-07	GO:0003824; GO:0009451; GO:0016740; GO:0043412; GO:0051536; GO:0051539; GO:0006400; GO:0005737
HmN_000794400	Hydroxyacylglutathione hydrolase	0.564466	2001.51	1352.9	1.73076e-06	GO:0004416; GO:0016787; GO:0019243
HmN_000287000	2 oxoglutarate and iron dependent oxygenase	0.564003	1595.4	1077.99	2.4225e-06	GO:0005506; GO:0016491; GO:0016705; GO:0016706; GO:0031418; GO:0055114
HmN_000123000	n/a	0.559985	1331.69	901.35	1.61984e-06	GO:0003779; GO:0007010
HmN_000033400	n/a	0.559248	1579.32	1073.33	9.55567e-08	GO:0009966; GO:0005578; GO:0046658
HmN_002025500	n/a	0.558997	8617.03	5847.4	3.92179e-08	GO:0016491; GO:0055114; GO:0004616; GO:0006098
HmN_000156900	Phosphatidylserine decarboxylase	0.556892	687.653	467.383	1.86639e-07	GO:0004609; GO:0008654
HmN_000082800	DNA dependent protein kinase catalytic subunit	0.556581	680.56	462.057	4.4758e-06	GO:0003677; GO:0004677; GO:0005524; GO:0005634; GO:0006303; GO:0006468; GO:0016301; GO:0016310; GO:0016773; GO:0005515; GO:0005488
HmN_000684200	Cholinesterase	0.555968	558.643	379.623	4.36274e-07	GO:0016020; GO:0016021
HmN_000043400	n/a	0.555252	661.107	448.44	3.54804e-06	n/a
HmN_000827400	Expressed protein	0.555159	4819.69	3279.19	3.56828e-13	n/a
HmN_000869500	Pentatricopeptide repeat containing protein 3	0.554055	1056.74	718.347	3.9708e-08	GO:0005515; GO:0019843; GO:0043024; GO:0032543; GO:0005739
HmN_000234100	Sodium:potassium:calcium exchanger	0.553515	1145.08	781.39	4.64772e-07	GO:0016020; GO:0016021; GO:0055085
HmN_000838500	n/a	0.552491	4620.76	3148.54	2.42468e-08	GO:0008017; GO:0005515; GO:0005509; GO:0005856
HmN_000608400	Protein FAM49B	0.552172	597.85	408.39	8.59715e-06	n/a
HmN_000706800	Heterogeneous nuclear ribonucleoprotein k	0.551812	4314.45	2940.83	2.9092e-10	GO:0003676; GO:0003723; GO:0019013; GO:0030529
HmN_002220300	n/a	0.546834	6200.34	4241.25	1.31242e-06	GO:0005515
HmN_000868400	Pseudouridine metabolizing bifunctional protein	0.5461	4410.46	3018.18	9.37991e-07	GO:0008152; GO:0016798
HmN_000592100	Protocadherin 1	0.543399	1097.65	750.733	6.5148e-06	GO:0005509; GO:0005886; GO:0007155; GO:0007156; GO:0016020; GO:0016021
HmN_000327500	Lag1 longevity assurance 1	0.542521	1145.82	787.04	3.69015e-06	GO:0005783; GO:0016020; GO:0016021
HmN_000769900	Zinc transporter 9	0.540679	2184.12	1500.76	9.02521e-16	GO:0003690; GO:0005739; GO:0006355; GO:0006812; GO:0008324; GO:0016020; GO:0016021; GO:0055085; GO:0098655
HmN_000261800	Succinate dehydrogenase	0.538031	19413.6	13369.5	2.05677e-13	GO:0005739; GO:0005743; GO:0006099; GO:0008177; GO:0009055; GO:0016491; GO:0046872; GO:0051536; GO:0051537; GO:0051538; GO:0051539; GO:0055114
HmN_000732700	Integrator complex subunit 4	0.537452	1754.04	1206.99	1.07818e-07	GO:0003824; GO:0016829; GO:0016831; GO:0019752; GO:0030170; GO:0005488
HmN_000407300	Elongation factor 2	0.534612	35164	24267.2	9.49903e-09	GO:0000166; GO:0003746; GO:0003924; GO:0005525; GO:0006414
HmN_000749400	Innexin	0.534069	5486.98	3788.79	9.82526e-14	GO:0005921; GO:0006810; GO:0006811; GO:0016020; GO:0016021; GO:0030054
HmN_000423000	Nucleic acid binding	0.533524	810.79	560.133	1.78627e-06	GO:0016491; GO:0055114
HmN_000419700	Expressed conserved protein	0.533434	13627.9	9412.39	2.0246e-11	n/a
HmN_000153100	Ribosomal protein S3	0.531921	12990.8	8982.7	4.6131e-09	GO:0003723; GO:0003735; GO:0005840; GO:0006412; GO:0015935; GO:0030529
HmN_000424900	Expressed conserved protein	0.531916	2200.89	1523.62	1.12657e-08	n/a
HmN_000036900	Heterogeneous nuclear ribonucleoprotein A1	0.531302	10257	7095.79	1.12207e-09	GO:0000166; GO:0003676; GO:0019013; GO:0030529
HmN_000273100	n/a	0.530856	1384.18	958.203	4.64399e-09	GO:0005515
HmN_000458600	Heterogeneous nuclear ribonucleoprotein A2	0.528088	3919.86	2718.85	4.71775e-15	GO:0000166; GO:0003676; GO:0019013; GO:0030529
HmN_000950000	n/a	0.52776	6610.46	4583.26	3.60397e-13	GO:0003676; GO:0005515
HmN_000729200	AP 2 complex subunit mu 1	0.526019	1647.45	1142.15	1.01457e-08	GO:0006810; GO:0006886; GO:0015031; GO:0016020; GO:0016192; GO:0030131
HmN_000278300	Ferric chelate reductase	0.525814	4245.73	2946.91	1.21192e-06	GO:0016020; GO:0016021; GO:0055114
HmN_000581500	n/a	0.525761	3251.86	2257.31	2.60529e-07	GO:0005509; GO:0005216; GO:0006811; GO:0055085; GO:0016020; GO:0005262; GO:0070588; GO:0005219; GO:0006874; GO:0016021; GO:0006816
HmN_000212200	Slit robo rho gtpase activating protein 1	0.525692	2347.67	1628.42	5.9805e-06	GO:0007165; GO:0005515
HmN_000001000	GTP binding protein 10	0.525096	613.647	426.57	6.53623e-06	GO:0000166; GO:0003676; GO:0004386; GO:0005524; GO:0008152; GO:0016787
HmN_000031900	Vacuolar protein sorting-associated protein 29	0.521527	926.243	646.98	3.2039e-06	GO:0006810; GO:0015031; GO:0042147; GO:0030904
HmN_000106200	rRNA 2' O methyltransferase fibrillarin	0.519631	1392.25	969.62	8.97348e-06	GO:0003723; GO:0006364; GO:0008033; GO:0008168; GO:0016740; GO:0032259
HmN_000369900	Diagnostic antigen gp50	0.519401	6823.04	4758.53	3.94266e-06	n/a
HmN_002201800	n/a	0.518839	974.523	679.39	1.02357e-06	n/a
HmN_000669600	Expressed protein	0.518648	787.28	549.407	7.28304e-07	n/a
HmN_000031200	Proliferation associated protein 2G4	0.517836	4609.49	3218.18	2.46323e-07	GO:0003700; GO:0006355; GO:0007049
HmN_000527800	Expressed conserved protein	0.517787	2191.47	1528.77	2.43671e-07	n/a
HmN_000388300	n/a	0.517185	2800.35	1954.59	3.97481e-11	GO:0003723; GO:0009982; GO:0001522; GO:0009451
HmN_000394800	Alanine aminotransferase 2	0.516538	5896.69	4120.09	3.4495e-06	GO:0003824; GO:0008483; GO:0009058; GO:0016740; GO:0030170
HmN_000066900	Dephospho coenzyme A related kinases	0.515816	648.063	452.133	7.88811e-06	GO:0003824; GO:0004140; GO:0005524; GO:0009058; GO:0015937; GO:0016301; GO:0016310
HmN_000736900	n/a	0.514817	992.96	693.077	7.84837e-07	n/a
HmN_000378200	3 hydroxyacyl coenzyme A dehydratase 3	0.514295	974.66	682.623	4.80582e-09	GO:0016020; GO:0016021
HmN_000217500	40S ribosomal protein S2	0.512489	11582.9	8115.64	3.23013e-08	GO:0003723; GO:0003735; GO:0005840; GO:0006412; GO:0015935; GO:0030529
HmN_000034500	Ring finger protein 14	0.511971	1255.79	879.177	3.21595e-07	GO:0004842; GO:0008270; GO:0016567; GO:0046872; GO:0005515
HmN_000467000	n/a	0.510224	5933.22	4165.29	4.1174e-09	GO:0003723; GO:0003676
HmN_000194300	Gpi ethanolamine phosphate transferase 1	0.510018	868.747	610.27	2.56747e-06	GO:0003824; GO:0005789; GO:0006506; GO:0008152; GO:0016020; GO:0016021; GO:0016740
HmN_000861920	n/a	0.509333	1898.51	1332.67	2.06031e-07	GO:0008641; GO:0019948; GO:0016925
HmN_000106700	WD repeat containing protein 27	0.507582	1978.77	1389.15	4.43017e-06	n/a
HmN_000615100	Acid trehalase protein 1	0.503527	2424.87	1709.63	6.94714e-09	GO:0003824; GO:0005975
HmN_000277000	Expressed conserved protein	0.502573	2092.98	1475.07	5.40568e-09	n/a
HmN_000617500	DEP domain containing protein 5	0.501536	1608.08	1136.07	1.9842e-09	GO:0016020; GO:0016021; GO:0005515
HmN_000256600	Expressed protein	0.497739	1946.85	1379.26	1.87349e-06	n/a
HmN_002158500	n/a	0.495177	9093.14	6449.66	9.78379e-07	GO:0016020
HmN_000446700	Ng dimethylarginine dimethylaminohydrolase	0.494749	3136.44	2223.95	1.87061e-07	GO:0008152; GO:0016787
HmN_000258300	Cytosolic malate dehydrogenase	0.49231	101633	72238.9	8.8937e-12	GO:0003824; GO:0005975; GO:0006108; GO:0016491; GO:0016615; GO:0016616; GO:0019752; GO:0030060; GO:0055114
HmN_000369800	V type proton ATPase subunit C 1 A	0.490663	1488.72	1059.68	3.08877e-06	GO:0015078; GO:0015991; GO:0033180
HmN_000444800	Expressed protein	0.487617	1239.96	883.12	9.0124e-06	GO:0005261; GO:0015672; GO:0016020; GO:0016021; GO:0098655
HmN_000714000	Girdin	0.487073	1319.72	942.183	7.78627e-08	n/a
HmN_000916700	Chromatin regulatory protein sir2	0.48535	649.403	464.847	7.31028e-06	GO:0006476; GO:0008270; GO:0016811; GO:0051287; GO:0070403; GO:0017136
HmN_000100000	H:ACA ribonucleoprotein complex subunit 4	0.48489	2045.81	1460.02	6.53653e-06	GO:0001522; GO:0003723; GO:0006396; GO:0009451; GO:0009982; GO:0019013; GO:0030529
HmN_000407600	Expressed conserved protein	0.484718	2647.78	1890.98	1.65786e-11	n/a
HmN_000459400	Galectin	0.482809	1109.57	793.393	7.93385e-06	GO:0008152; GO:0016874; GO:0030246
HmN_000661500	Poly(ADP ribose) glycohydrolase	0.481729	1727.13	1236.79	5.36266e-08	GO:0003735; GO:0004649; GO:0005622; GO:0005840; GO:0005975; GO:0006412; GO:0016787
HmN_000727200	Ribosomal protein l5	0.481548	14671	10505.6	7.5575e-08	GO:0003735; GO:0005622; GO:0005840; GO:0006412; GO:0008097
HmN_000586600	Tetratricopeptide repeat protein 4	0.480298	1369.24	981.37	4.59634e-07	GO:0005515
HmN_000015900	ATP synthase subunit gamma	0.479922	4147.97	2973.34	4.02582e-07	GO:0006754; GO:0006810; GO:0006811; GO:0015986; GO:0015992; GO:0016301; GO:0016310; GO:0045261; GO:0046933; GO:0046961
HmN_000083000	Expressed conserved protein	0.479463	5373.75	3852.98	2.94488e-06	GO:0005892
HmN_000402900	Expressed protein	0.478957	7606.08	5454.38	9.24806e-09	n/a
HmN_002157900	n/a	0.478035	2365.57	1699.48	6.14672e-07	GO:0015293; GO:0016021
HmN_000508400	Glutamate receptor, ionotropic, kainate 1	0.471967	1223.59	881.657	2.48679e-06	GO:0003676; GO:0016020; GO:0016021
HmN_000801400	Expressed protein	0.470584	8356.3	6029.01	3.58532e-07	GO:0005515
HmN_000341300	Sorting nexin 13	0.468419	2969.44	2144.71	8.86137e-06	GO:0000166; GO:0003676; GO:0016020; GO:0016021; GO:0035091
HmN_002004300	n/a	0.468265	4264.05	3082.2	1.11674e-07	GO:0051015
HmN_000331900	Expressed protein	0.467814	2741.29	1980.42	1.72038e-07	n/a
HmN_000418100	WD40 YVTN repeat containing domain	0.467229	1172.68	846.72	4.15422e-06	GO:0005515
HmN_000310900	Expressed protein	0.465653	1008.59	728.803	6.6742e-07	n/a
HmN_000640700	Mitochondrial atp synthase chain	0.464748	4619.93	3346.62	4.39098e-07	GO:0000276; GO:0015078; GO:0015986
HmN_000806100	RNA binding protein EWS	0.462109	3636.16	2639.87	8.06228e-08	GO:0000166; GO:0003676; GO:0003723; GO:0006355
HmN_000572700	Diagnostic antigen gp50	0.461944	5508.75	3999.66	1.10943e-08	n/a
HmN_000575900	Ormdl protein	0.461903	4277.65	3104.13	8.49029e-08	GO:0006487; GO:0008250; GO:0016020; GO:0016021
HmN_000561100	Cytochrome c oxidase subunit XV assembly	0.459593	1034.25	751.563	1.16774e-07	GO:0006784; GO:0016020; GO:0016021; GO:0016627; GO:0055114
HmN_000184400	Porphobilinogen deaminase	0.459278	1405.07	1021.54	6.15953e-07	GO:0004418; GO:0018160; GO:0033014
HmN_000568800	MAP kinase activated protein kinase 2	0.459197	1954.8	1422.23	1.69194e-07	GO:0000166; GO:0004672; GO:0005524; GO:0006468; GO:0016301; GO:0016310
HmN_000147300	Non-specific protein-tyrosine kinase	0.458982	858.357	623.577	5.33501e-06	GO:0000166; GO:0004672; GO:0004713; GO:0004715; GO:0005524; GO:0006468; GO:0016301; GO:0016310; GO:0016740; GO:0018108
HmN_000341200	Phosphatidylinositol transfer protein	0.458579	2702.47	1966.97	4.33007e-09	GO:0005622; GO:0006810; GO:0005548; GO:0015914
HmN_002001800	n/a	0.457598	6833.98	4974.01	4.42601e-06	GO:0005515
HmN_000792000	Actin related protein 2:3 complex subunit 1A:1B	0.454854	4037.79	2945.05	7.12744e-11	GO:0005885; GO:0015629; GO:0030833; GO:0034314; GO:0005515
HmN_000286500	Eukaryotic translation initiation factor 3 subunit L	0.454828	2846.55	2074.9	1.69068e-09	GO:0001731; GO:0003743; GO:0005737; GO:0005852; GO:0006412; GO:0006413; GO:0006446; GO:0016282; GO:0033290
HmN_000289200	Mannose 1 phosphate guanyltransferase beta	0.452841	1783.06	1303	3.03084e-10	GO:0009058; GO:0016740; GO:0016779
HmN_000854900	Protein FAM98A	0.449655	1827.64	1338.61	9.10818e-06	GO:0005515
HmN_000480100	Mitochondrial inner membrane protein	0.447188	3554.27	2605.31	6.48373e-11	GO:0005739; GO:0005743; GO:0016020; GO:0016021
HmN_000530900	Guanine nucleotide binding protein subunit	0.444499	11581.7	8508.02	4.4979e-06	GO:0005515
HmN_000709300	n/a	0.44299	3424.04	2517.44	9.07165e-07	GO:0003824; GO:0046872
HmN_000557300	Invadolysin (M08 family)	0.43963	950.73	699.96	2.3761e-06	GO:0003824; GO:0008152; GO:0016740
HmN_000743900	DNA directed RNA polymerase III subunit RPC5	0.437138	1016.81	749.99	2.92305e-06	GO:0003899; GO:0005634; GO:0006351
HmN_000491200	Ras protein Rap 1b	0.436794	4323.36	3190.97	1.02414e-06	GO:0000166; GO:0003924; GO:0005525; GO:0005622; GO:0006886; GO:0006913; GO:0007165; GO:0007264; GO:0008152; GO:0015031; GO:0016020
HmN_000705800	L-lactate dehydrogenase	0.435837	18935.5	13994.6	4.57682e-11	GO:0003824; GO:0004459; GO:0005737; GO:0005975; GO:0016491; GO:0016616; GO:0019752; GO:0055114
HmN_000652200	tRNA (Cytosine(34) C(5)) methyltransferase	0.434968	765.527	565.5	3.33662e-06	GO:0003723; GO:0008168; GO:0016428; GO:0016740; GO:0030488; GO:0032259
HmN_000224500	Peptidyl prolyl cis trans isomerase FKBP5	0.433845	997.21	737.44	2.93144e-07	GO:0008152; GO:0016853; GO:0005515
HmN_000089300	Adenosine deaminase	0.432415	2939.11	2175.76	1.4469e-07	GO:0009168; GO:0019239
HmN_000489100	Sodium coupled neutral amino acid	0.432312	933.827	691.39	2.95739e-06	GO:0016020; GO:0016021
HmN_000544300	n/a	0.429431	1045.48	776.007	4.40727e-07	n/a
HmN_002090600	n/a	0.428308	1076.86	799.947	1.48099e-07	n/a
HmN_000472500	Alpha N acetylgalactosaminidase	0.42827	2740.49	2035.47	7.69433e-08	GO:0003824; GO:0004553; GO:0005975; GO:0008152; GO:0016787; GO:0016798
HmN_000133300	PDZ domain containing protein GIPC3	0.42771	1572.22	1168.39	2.33846e-06	GO:0009055; GO:0016020; GO:0016021; GO:0020037
HmN_000815700	n/a	0.419209	4262.4	3185.5	8.3344e-07	GO:0003950; GO:0006471; GO:0004970; GO:0016020; GO:0005234; GO:0004872; GO:0005216; GO:0006811; GO:0006886
HmN_000240500	Pyruvate dehydrogenase E1 component subunit alpha	0.41821	24021.2	17973.3	5.45426e-13	GO:0004175; GO:0004298; GO:0004739; GO:0005839; GO:0006086; GO:0008152; GO:0016491; GO:0016624; GO:0016787; GO:0043231; GO:0051603; GO:0055114
HmN_000124200	Actin binding WH2	0.417354	1657.61	1239.08	4.57548e-06	GO:0003779
HmN_000603800	Pescadillo homolog	0.414606	1958.74	1468.43	8.84494e-07	GO:0000463; GO:0000466; GO:0005634; GO:0005654; GO:0005730; GO:0006364; GO:0030687; GO:0042254; GO:0042273; GO:0043021
HmN_000980000	Beta tubulin	0.411989	5032.98	3783.86	2.43791e-07	GO:0000166; GO:0003924; GO:0005200; GO:0005525; GO:0005737; GO:0005856; GO:0005874; GO:0007017; GO:0008152
HmN_000539000	F actin capping protein subunit beta	0.411708	2423.53	1820.75	8.6403e-06	GO:0008290; GO:0051016
HmN_000578500	n/a	0.405691	964.877	728.913	6.00939e-06	GO:0005515
HmN_000316600	n/a	0.396124	1877.12	1427.85	1.27142e-06	GO:0005515; GO:0005737
HmN_000112700	Tubby	0.394816	3385.87	2574.78	2.24077e-07	GO:0008152; GO:0016874
HmN_000630000	Pyruvate kinase	0.387009	3528.01	2695.31	2.04672e-06	GO:0000287; GO:0003824; GO:0004743; GO:0005921; GO:0006096; GO:0006810; GO:0006811; GO:0016020; GO:0016021; GO:0016301; GO:0016310; GO:0016740; GO:0030054; GO:0030955
HmN_000209900	14-3-3 protein epsilon	0.38649	5293.51	4050.01	2.28489e-08	GO:0019904
HmN_000314400	Thioredoxin protein 1	0.382669	1894.06	1452.63	9.27065e-06	GO:0005623; GO:0045454
HmN_000795100	n/a	0.381803	1953.81	1498.25	1.20158e-06	GO:0016020
HmN_000770200	RAB14, member RAS oncogene family	0.380227	1014.09	778.687	4.28219e-06	GO:0000166; GO:0003924; GO:0005525; GO:0005622; GO:0005802; GO:0006886; GO:0006895; GO:0006913; GO:0007165; GO:0007264; GO:0008152; GO:0015031; GO:0016020; GO:0032456; GO:0042742; GO:0045335; GO:0055037; GO:0090382
HmN_000414400	Ezrin	0.377304	2056.71	1581.8	8.95747e-06	GO:0005737; GO:0005856; GO:0008092; GO:0008285; GO:0019898
HmN_000288900	Sodium:myo inositol cotransporter	0.370489	1825.8	1412.43	1.68552e-06	GO:0005215; GO:0006810; GO:0016020; GO:0016021; GO:0055085; GO:0022857
HmN_000105900	Expressed protein	0.365582	4978.87	3864.55	3.09542e-08	GO:0005524; GO:0005856; GO:0005885; GO:0007015; GO:0034314
HmN_000553100	Fibrillin 2	0.357236	1903.44	1486.38	8.95747e-06	GO:0005201; GO:0005509; GO:0005578
HmN_000499400	Expressed conserved protein	0.356089	1501.79	1172.95	1.5585e-06	GO:0016020; GO:0016021
HmN_000043900	Aspartyl tRNA synthetase, cytoplasmic	0.355156	14200.1	11099.1	6.14555e-08	GO:0000166; GO:0003676; GO:0004812; GO:0004815; GO:0005524; GO:0005737; GO:0006412; GO:0006418; GO:0006422; GO:0016874
HmN_000441900	Phosphoglycerate kinase	0.352025	36081	28266.5	1.27321e-08	GO:0004618; GO:0005524; GO:0006096; GO:0016301; GO:0016310; GO:0016740
HmN_000643300	Phosphoglucomutase	0.327419	21458.5	17099.8	2.05791e-07	GO:0000287; GO:0003676; GO:0004523; GO:0005975; GO:0016868; GO:0071704; GO:0090502
HmN_000880100	Spliceosome rna helicase bat1	0.294447	6225.36	5076.13	2.10655e-06	GO:0003676; GO:0004386; GO:0005524; GO:0008152; GO:0016787
HmN_000017600	DnaJ subfamily A	-0.316532	12417.1	15467.1	2.01613e-07	GO:0005524; GO:0006457; GO:0009408; GO:0031072; GO:0046872; GO:0051082
HmN_002132500	n/a	-0.351282	1675.49	2139.64	9.16397e-07	GO:0070569; GO:0008152
HmN_000191200	Asparagine rich protein	-0.356211	3620.96	4633.77	5.21095e-06	GO:0000287; GO:0004749; GO:0009156; GO:0009165; GO:0044249; GO:0009116
HmN_000177300	n/a	-0.406041	2102.43	2788.42	4.70277e-06	n/a
HmN_000248300	G protein coupled receptor 108	-0.417409	3028.35	4044.04	3.51169e-06	GO:0016020; GO:0016021
HmN_000671800	Basigin	-0.423688	1891.1	2539.01	3.58605e-07	GO:0016020; GO:0016021
HmN_000340600	Expressed protein	-0.424908	3653.55	4902.24	1.55818e-07	n/a
HmN_000376700	Bloom syndrome protein	-0.42537	1206.42	1619.51	3.52861e-06	GO:0005515
HmN_000815200	Zinc transporter ZIP14	-0.4287	979.933	1321.55	3.18944e-07	GO:0016020; GO:0016021; GO:0030001; GO:0046873; GO:0055085
HmN_000218100	n/a	-0.434335	4643.21	6276.57	3.09162e-06	GO:0005515
HmN_000835400	Protein KRI1	-0.434346	820.723	1107.71	1.41668e-06	n/a
HmN_000322300	n/a	-0.437392	3995.45	5411.82	3.98763e-07	n/a
HmN_000115500	Protein RIC1	-0.445691	551.163	751.143	4.11783e-06	GO:0005515
HmN_000404500	DnaJ (Hsp40) subfamily C member	-0.446175	1263.07	1719.47	6.07364e-09	GO:0005515
HmN_000376800	NMDA receptor glutamate binding chain	-0.44678	3818.19	5208.31	3.48342e-08	GO:0016020; GO:0016021
HmN_000541000	Protein tyrosine phosphatase type IVA 1	-0.450449	1594.24	2176.97	2.05689e-06	GO:0006470; GO:0008138; GO:0016311; GO:0016791
HmN_000013400	Equilibrative nucleoside transporter	-0.452589	1385.09	1895.08	9.65819e-06	GO:0005337; GO:0006810; GO:0016020; GO:0016021; GO:1901642
HmN_000701500	Vacuolar protein sorting associated protein	-0.454491	723.4	994.18	3.2039e-06	GO:0005515
HmN_000194600	RNA polymerase associated protein RTF1	-0.459276	1708.52	2349.18	9.99722e-09	GO:0003677; GO:0004518; GO:0005634; GO:0006259; GO:0006352; GO:0006368; GO:0016570; GO:0016593; GO:0090305
HmN_000793600	Riboflavin transporter 2 A	-0.459853	749.57	1033.02	1.13776e-06	GO:0016020; GO:0016021; GO:0032217; GO:0032218; GO:0005887
HmN_000299000	Protein-tyrosine-phosphatase	-0.463637	1225.65	1691.39	1.65033e-06	GO:0004721; GO:0004725; GO:0006470; GO:0016311; GO:0016787; GO:0016791; GO:0035335
HmN_000115000	WW domain binding protein 2	-0.464596	1489.48	2055.99	6.36642e-08	n/a
HmN_000520100	Protein kinase	-0.46913	1336.16	1848.19	1.02959e-07	GO:0016301; GO:0016310
HmN_000742800	n/a	-0.475817	2413.4	3359.63	3.91808e-08	n/a
HmN_002171200	n/a	-0.477036	811.423	1129.57	3.98026e-06	GO:0005096; GO:0007049; GO:0043547
HmN_000643400	Tropomyosin	-0.488807	2738.35	3843.41	5.6922e-06	n/a
HmN_000491800	Diaphanous	-0.488947	1884.51	2645.49	2.56725e-06	GO:0003779; GO:0007015; GO:0007049; GO:0016043; GO:0017048; GO:0030036; GO:0005488
HmN_000473500	DmX protein 1	-0.49	928.313	1305.96	1.70075e-07	GO:0005515
HmN_000258600	Expressed protein	-0.500852	1347.27	1907.95	3.55763e-07	n/a
HmN_000301800	WD repeat containing protein 59	-0.504306	1030.05	1462.88	2.88801e-06	GO:0005515; GO:0032008; GO:0061700
HmN_000517600	Laminin subunit beta 1	-0.513916	2213.53	3158.75	2.03993e-10	n/a
HmN_002198200	n/a	-0.516917	936.567	1340.74	1.29153e-10	GO:0008603; GO:0001932; GO:0005952
HmN_002139600	n/a	-0.517281	1380.24	1979.16	1.30852e-06	n/a
HmN_000050900	n/a	-0.518444	444.03	638.65	5.68313e-06	n/a
HmN_000062800	MFS transporter ceroid lipofuscinosis neuronal	-0.521676	955.743	1372.68	2.79495e-07	GO:0016020; GO:0016021; GO:0055085
HmN_000143800	Tumor suppressor p53 binding protein 1	-0.522122	381.253	547.98	2.893e-06	n/a
HmN_000532300	Major egg antigen	-0.525483	5288.87	7612.4	5.7176e-11	n/a
HmN_000745800	Integrator complex subunit 1	-0.525972	799.75	1153.83	1.14285e-06	n/a
HmN_000446100	E3 ubiquitin protein ligase HERC4	-0.526844	1703.27	2454.37	1.86985e-07	GO:0004842; GO:0008152; GO:0016567; GO:0016874
HmN_000659000	Dipeptidyl peptidase 9	-0.527028	1854.34	2673.86	2.42604e-07	GO:0006508; GO:0008236
HmN_002230900	n/a	-0.527194	674.3	974.2	6.70107e-06	GO:0005515
HmN_000168500	Fad synthase	-0.53097	639.82	927.437	6.26081e-06	GO:0003824; GO:0008152
HmN_000030500	Transmembrane emp24 domain containing protein	-0.532169	1330.06	1924.44	4.01783e-07	GO:0005622; GO:0006810; GO:0016021
HmN_000109200	n/a	-0.533646	837.757	1213.84	9.1976e-06	n/a
HmN_000584600	DNA mismatch repair protein Mlh1	-0.534061	811.96	1176.28	6.10346e-06	GO:0005524; GO:0006298; GO:0030983; GO:0032300
HmN_000669700	Fructose-bisphosphate aldolase	-0.534113	50257.6	72796.8	7.11294e-08	GO:0003824; GO:0004332; GO:0006096; GO:0016829
HmN_000750400	Storkhead box protein 1	-0.535379	535.01	774.78	3.95738e-06	n/a
HmN_000643200	Protein lin 9	-0.539707	2029.84	2953.51	7.28923e-06	GO:0006351; GO:0007049; GO:0017053
HmN_000487700	Tissue type plasminogen activator	-0.541625	6471.63	9422.18	4.01766e-08	GO:0016020; GO:0016021
HmN_000127200	Zinc finger, C2H2	-0.541949	864.443	1260.36	3.06551e-06	GO:0046872; GO:0003676
HmN_000276600	Rna binding protein musashi	-0.544115	1891.51	2758.83	9.01817e-08	GO:0000166; GO:0003676
HmN_000329100	B cell receptor associated protein	-0.544711	1791.61	2614.76	1.53196e-08	GO:0005783; GO:0006886; GO:0016020; GO:0016021
HmN_000312700	Pre mRNA splicing factor 18	-0.549191	628.14	920.167	3.52622e-06	GO:0005681; GO:0008380
HmN_000621500	n/a	-0.549365	405.117	592.783	1.5843e-07	n/a
HmN_000488200	Expressed conserved protein	-0.549823	3892.02	5697.65	5.31338e-07	n/a
HmN_000110500	Dentin sialophosphoprotein	-0.551398	1120.46	1643.34	1.60601e-10	GO:0000166; GO:0003676; GO:0045892
HmN_000142600	Proteasome associated protein ECM29	-0.553641	1464.32	2150.27	1.04343e-07	GO:0000502; GO:0032947; GO:0043248; GO:0005488
HmN_000014100	Histone binding protein Caf1	-0.554662	727.253	1071.28	6.45224e-06	GO:0005634; GO:0005515
HmN_000010100	alpha-1,2-Mannosidase	-0.557434	813.957	1198.03	9.07302e-12	GO:0004571; GO:0005509; GO:0008152; GO:0016020; GO:0016021; GO:0016787; GO:0016798
HmN_002029100	n/a	-0.557711	1074.99	1585.22	4.60149e-10	n/a
HmN_002003000	n/a	-0.561504	2455.65	3626.25	4.85523e-07	n/a
HmN_000949900	Expressed conserved protein	-0.562675	1649.12	2438.56	9.57288e-09	GO:0016020; GO:0016021
HmN_000482100	Solute carrier family 2 facilitated glucose	-0.565805	1115.37	1650.19	5.90012e-08	GO:0005215; GO:0006810; GO:0016020; GO:0016021; GO:0022857; GO:0022891; GO:0055085
HmN_000845900	U5 small nuclear ribonucleoprotein 40 kDa	-0.56628	584.08	867.183	5.81695e-07	GO:0019013; GO:0030529; GO:0005515
HmN_000072800	5' AMP activated protein kinase subunit gamma	-0.567278	631.267	936.52	4.28924e-09	GO:0016301; GO:0016310
HmN_000009200	Transcriptional activator	-0.56887	996.01	1479.32	7.62232e-09	GO:0008270; GO:0046872
HmN_000065600	Cpg binding protein	-0.572236	331.677	492.29	2.76064e-06	n/a
HmN_000758800	n/a	-0.573896	1513.8	2256.24	4.65277e-06	GO:0008270
HmN_000279100	Innexin	-0.574528	9593	14290.9	1.43496e-08	GO:0005921; GO:0006810; GO:0006811; GO:0016020; GO:0016021; GO:0030054
HmN_000308200	Chitobiosyldiphosphodolichol	-0.577708	1010.01	1508.41	1.78528e-07	GO:0008152; GO:0016757
HmN_002165500	n/a	-0.585231	408.757	615.69	5.45722e-06	GO:0004672; GO:0005524; GO:0006468
HmN_000973200	n/a	-0.586329	1238.86	1860.42	9.23557e-07	GO:0005488
HmN_002230800	n/a	-0.586984	442.35	666.72	6.68092e-07	GO:0016301; GO:0032958
HmN_000624600	Ankyrin repeat containing	-0.587986	1501.2	2255.34	5.9379e-08	GO:0005515
HmN_000067400	Gamma tubulin complex component 3	-0.588396	1237.18	1862.59	3.25284e-06	GO:0000226; GO:0000922; GO:0005815; GO:0090063; GO:0043015; GO:0007020
HmN_000828700	n/a	-0.588782	1363.65	2052.06	9.18049e-07	GO:0004672; GO:0005524; GO:0006468
HmN_000463700	n/a	-0.591453	970.793	1461.58	1.89125e-11	GO:0016020; GO:0016021
HmN_000120400	n/a	-0.592054	633.673	957.477	4.26724e-09	n/a
HmN_000926700	Zinc finger protein	-0.592149	1558.14	2352.1	2.55688e-09	GO:0003676; GO:0046872
HmN_000428600	Pyruvate dehydrogenase kinase, isozyme 2	-0.59256	1688.9	2550.17	8.73152e-07	GO:0016301; GO:0016310
HmN_002021200	n/a	-0.595067	569.69	860.42	4.07254e-06	GO:0048037; GO:0004733; GO:0010181; GO:0008615; GO:0016638; GO:0055114
HmN_000363100	Protein Sprint	-0.595884	425.273	640.697	6.16433e-07	n/a
HmN_000480600	Receptor Mediated Endocytosis family member	-0.596465	2681.1	4052.81	3.85821e-13	GO:0005509; GO:0005525; GO:0005515; GO:0032456
HmN_000173800	Protein iws1	-0.596893	652.797	986.12	1.37199e-07	GO:0003677; GO:0005634; GO:0006351
HmN_000184200	RNA directed DNA polymerase (Reverse transcriptase)	-0.601336	1135.07	1721.98	8.62004e-12	GO:0003964; GO:0006278; GO:0003723
HmN_002121000	n/a	-0.602244	801.973	1218.43	4.56268e-14	GO:0005524
HmN_000174400	Arginase	-0.607459	1022.75	1559.98	9.54758e-07	GO:0000050; GO:0004053; GO:0006525; GO:0016787; GO:0016813; GO:0046872
HmN_000749700	Microtubule associated protein xmap215	-0.608633	1229.78	1876.19	2.84036e-08	GO:0005488
HmN_000479400	Dihydrolipoyllysine residue succinyltransferase	-0.609744	1561.13	2383.31	4.95911e-14	GO:0004149; GO:0006099; GO:0008152; GO:0016740; GO:0016746; GO:0045252
HmN_000627500	Papilin	-0.610491	706.573	1076.58	3.0082e-08	GO:0004867; GO:0010951
HmN_000422900	Ral GTPase activating protein subunit	-0.610835	1037.66	1587.79	3.65875e-07	GO:0005096; GO:0016020; GO:0016021; GO:0043547; GO:0051056; GO:0005634
HmN_000734100	Sj ts4 protein	-0.612956	10521	16096	4.33928e-13	n/a
HmN_002219200	n/a	-0.6163	1050.57	1612.5	2.05089e-07	GO:0004573; GO:0009311; GO:0003824
HmN_000118200	Cathepsin d (Lysosomal aspartyl protease)	-0.616411	2952.84	4528.49	3.33268e-11	GO:0004190; GO:0006508; GO:0008233; GO:0016787
HmN_002021300	n/a	-0.616466	1216.27	1864.33	2.91524e-07	n/a
HmN_000550200	Steroid dehydrogenase	-0.616791	1036.38	1593.07	5.31343e-08	GO:0008152; GO:0016491; GO:0055114
HmN_002126300	n/a	-0.617019	557.547	855.747	8.10814e-06	GO:0003676
HmN_000263400	n/a	-0.628865	1008.15	1560.56	1.53372e-10	GO:0016021
HmN_000669900	Ribosomal protein S6 kinase delta 1	-0.630439	493.963	764.343	3.27438e-11	GO:0004672; GO:0005524; GO:0006468; GO:0016301; GO:0016310; GO:0035091
HmN_000420600	Expressed conserved protein	-0.632308	1133.75	1759.7	6.75007e-07	GO:0004518; GO:0006281; GO:0090305
HmN_000799400	Heat shock protein 70	-0.634462	9557.01	14838.4	1.24991e-08	GO:0000166; GO:0005524
HmN_000084200	Solute carrier family 13	-0.635018	11047.2	17160.2	7.8322e-09	GO:0005215; GO:0006814; GO:0016020; GO:0016021; GO:0055085
HmN_000076400	PWWP domain containing protein 2A	-0.638359	1189.84	1851.88	1.75299e-11	n/a
HmN_000193300	Glycerol 3 phosphate acyltransferase 3	-0.638409	2202.27	3427.42	4.36222e-07	GO:0008152; GO:0016020; GO:0016021; GO:0016740; GO:0016746
HmN_000819300	Ral guanine nucleotide exchange factor with pH	-0.641368	972.34	1515.96	1.69086e-12	GO:0005085; GO:0005622; GO:0007264; GO:0043547
HmN_000915400	n/a	-0.643055	360.233	562.467	5.60844e-06	n/a
HmN_000197300	ATPase, F1 V1 A1 complex, alpha beta subunit, nucleotide binding domain, active site	-0.648229	757.34	1187.41	2.1805e-07	n/a
HmN_000692500	Fasciculation and elongation protein zeta	-0.649217	614.847	966.667	3.36378e-09	n/a
HmN_000228600	Ormdl protein	-0.649575	1910.54	3000.27	2.59447e-06	GO:0005789; GO:0016020; GO:0016021; GO:0005515
HmN_000264800	Tubulin alpha 1C chain	-0.649722	2455.39	3852.98	3.23325e-08	GO:0000166; GO:0003924; GO:0005200; GO:0005525; GO:0005737; GO:0005856; GO:0005874; GO:0007017; GO:0008152
HmN_000308000	Bifunctional protein NCOAT	-0.651473	1830.6	2877.7	8.91423e-10	n/a
HmN_002007700	n/a	-0.65157	1304.05	2052.52	4.17478e-08	GO:0003700; GO:0006355; GO:0005667; GO:0007049
HmN_000737400	Protein phosphatase 2C	-0.653271	757.863	1191.17	2.09002e-07	GO:0003824; GO:0004722; GO:0006470
HmN_000523200	Niemann Pick C1 protein	-0.653388	618.867	971.853	8.49354e-09	GO:0005524; GO:0006139; GO:0007165; GO:0008158; GO:0016020; GO:0016021; GO:0016301; GO:0016310; GO:0016740; GO:0019205
HmN_000622900	Developmentally regulated GTP binding protein 2	-0.655944	926.86	1461.02	4.62981e-06	GO:0005525
HmN_000438100	Lariat debranching enzyme	-0.656752	457.833	723.377	4.12622e-07	GO:0006397; GO:0016787; GO:0016788
HmN_000098700	Zinc finger, C6HC type	-0.657277	766.073	1210.58	2.29384e-10	GO:0004842; GO:0008270; GO:0016567; GO:0046872
HmN_000905900	Zinc finger, C2H2 type	-0.657388	1112.29	1755.97	2.05199e-12	GO:0046872; GO:0003676
HmN_000518100	ATP binding cassette sub family B	-0.657728	1071.9	1693.12	2.03709e-16	GO:0000166; GO:0005524; GO:0006810; GO:0008152; GO:0016020; GO:0016021; GO:0016887; GO:0042626; GO:0055085
HmN_000291900	SH3 and multiple ankyrin repeat domains protein	-0.657956	626.02	987.783	4.98013e-10	GO:0005515
HmN_000474800	Exocyst complex component 5	-0.658548	1050.7	1659.15	6.88825e-17	GO:0005737; GO:0006887; GO:0048278; GO:0000145
HmN_000815800	Limkain b1	-0.658777	1510.58	2387.1	3.65486e-08	GO:0005777; GO:0010468; GO:0005515
HmN_000643700	G patch domain containing 1	-0.659891	547.823	864.823	1.0914e-06	GO:0006397
HmN_000064100	Peptidyl prolyl cis trans isomerase FKBP4	-0.661394	1672.74	2648.18	9.60221e-11	GO:0006457; GO:0008152; GO:0016853; GO:0005515; GO:0030154; GO:0042761; GO:0099402
HmN_000323500	Cell polarity protein	-0.663556	1094.45	1731.49	2.19683e-09	GO:0005515
HmN_000229200	Serine:threonine protein phosphatase 2A 65 kDa	-0.664036	1710.26	2713.46	3.42062e-06	GO:0005515; GO:0005488
HmN_000356100	Sin3 histone deacetylase corepressor complex	-0.669099	748.95	1192.49	3.92332e-08	n/a
HmN_000126400	USP6 N terminal protein	-0.671271	430.28	685.723	6.78396e-11	n/a
HmN_000279200	Innexin	-0.675493	14500.5	23173.6	1.39164e-06	GO:0005886; GO:0005921; GO:0006810; GO:0006811; GO:0016020; GO:0016021; GO:0030054
HmN_000003300	Glycogen debranching enzyme	-0.675621	3938	6290.45	1.48291e-09	GO:0003824; GO:0004134; GO:0004135; GO:0005975; GO:0005980
HmN_000302800	Palmitoyltransferase	-0.676257	644.907	1032.71	1.65247e-08	GO:0008152; GO:0008270; GO:0016020; GO:0016021; GO:0016740; GO:0016746; GO:0019706; GO:0046872
HmN_000239100	Expressed conserved protein	-0.67664	601.583	961.31	3.82218e-08	n/a
HmN_000641000	Multiple pdz domain protein	-0.678259	2913.95	4662.78	2.33113e-16	GO:0005515
HmN_000308300	Glycogenin 1	-0.678755	10814.1	17316.1	2.48327e-16	GO:0008152; GO:0016740; GO:0016757
HmN_002020400	n/a	-0.683666	766.52	1234.29	8.93663e-09	GO:0004843; GO:0016579
HmN_000787400	Interferon developmental regulator	-0.684855	2007.37	3230.08	2.36943e-11	GO:0005488
HmN_000775900	Ankyrin repeat domain containing protein 17	-0.685001	1729.81	2780.22	7.74515e-12	GO:0003676; GO:0003723; GO:0005515
HmN_000629700	Protein strawberry notch 1	-0.685096	819.307	1317.24	8.24656e-13	GO:0006355
HmN_000183800	Set1:ash2 histone methyltransferase complex	-0.686502	1206.92	1943.29	7.14516e-06	GO:0008168; GO:0008270; GO:0016740; GO:0032259; GO:0046872; GO:0005515; GO:0051568; GO:0048188
HmN_000021200	60s ribosomal protein l7	-0.687303	1564.88	2521	2.63677e-18	GO:0005840
HmN_000120800	Interferon stimulated exonuclease protein	-0.688645	809.74	1309.29	1.46486e-10	GO:0004527; GO:0016020; GO:0016021; GO:0090305
HmN_000468700	n/a	-0.689031	1012.2	1631.26	3.94331e-13	GO:0007155; GO:0008305
HmN_000671900	Expressed protein	-0.690156	319.78	517.827	7.46924e-06	n/a
HmN_000374200	n/a	-0.690607	1100.1	1778.79	4.33508e-13	GO:0023052
HmN_000555100	n/a	-0.691637	591.047	955.687	2.4806e-08	n/a
HmN_000550600	Carbohydrate puine kinase, PfkB	-0.693002	415.977	672.7	4.76447e-09	GO:0016301; GO:0016310
HmN_000285200	Autophagy protein 11	-0.693045	758.763	1228.63	6.07044e-11	n/a
HmN_000119000	Sodium dependent phosphate transporter 2	-0.695737	1076.42	1743.67	1.32377e-08	GO:0005315; GO:0006817; GO:0016020; GO:0016021; GO:0055085
HmN_000033100	Expressed conserved protein	-0.697804	291.08	474.663	1.29551e-06	n/a
HmN_000441800	Expressed protein	-0.699022	803.27	1304.65	7.09843e-06	n/a
HmN_000357300	Carboxy terminal domain RNA polymerase II	-0.699955	1478.84	2403.72	3.81746e-08	GO:0016311; GO:0016791
HmN_000339600	WD repeat containing protein 20	-0.700387	577.473	940.47	1.05126e-06	GO:0005515
HmN_000671100	Protein phosphatase	-0.702946	936.46	1528.64	1.07526e-07	GO:0006470; GO:0008138; GO:0016311
HmN_000669000	E3 SUMO protein ligase RanBP2	-0.70352	2679.71	4366.48	5.97503e-07	GO:0005622; GO:0008152; GO:0008270; GO:0016874; GO:0046907
HmN_000596000	Uridine 5' monophosphate synthase	-0.705904	1174.93	1917.48	6.64352e-12	GO:0003824; GO:0004588; GO:0004590; GO:0006207; GO:0006221; GO:0008152; GO:0009116; GO:0016740
HmN_002192600	n/a	-0.706718	675.79	1102.43	6.4206e-09	GO:0005515; GO:0008270
HmN_000875800	N acetylgalactosamine kinase	-0.70758	237.46	389.05	9.74336e-07	GO:0000166; GO:0004335; GO:0005524; GO:0005737; GO:0006012; GO:0008152; GO:0016301; GO:0016310; GO:0016740; GO:0016773; GO:0046835; GO:0005534
HmN_000169500	Step II splicing factor slu7	-0.710941	427.36	699.163	1.86639e-07	n/a
HmN_000423700	RNA binding protein Nova 1	-0.711436	481.597	786.813	6.86513e-08	GO:0003676; GO:0003723
HmN_000001700	Four and a half LIM domains protein 2	-0.711648	8943.34	14648.1	1.5076e-15	GO:0008270; GO:0046872
HmN_002002100	n/a	-0.712545	1349.18	2212.98	2.38059e-06	GO:0003676
HmN_000596800	Eukaryotic translation initiation factor 4 gamma	-0.71565	1813.53	2979.07	8.36024e-08	GO:0003723; GO:0003743; GO:0006413; GO:0005515; GO:0005488
HmN_000367100	n/a	-0.715983	2940.27	4829.61	6.99953e-17	GO:0055085; GO:0016021
HmN_000660200	Transmembrane protein 106A	-0.718896	402.53	662.81	8.3334e-10	GO:0016020; GO:0016021
HmN_000795700	Poly(A) RNA polymerase gld 2 A	-0.720471	942.72	1553.23	1.5076e-15	n/a
HmN_000220600	Photosynthetic reaction centre, L M	-0.72084	1180.02	1945.47	1.06342e-06	n/a
HmN_000077500	Large neutral amino acids transporter small	-0.720866	510.227	841.42	9.24806e-09	GO:0003333; GO:0015171; GO:0016020; GO:0016021; GO:0022857; GO:0055085
HmN_000622000	Bestrophin 1	-0.721246	430.343	708.377	1.23532e-07	GO:0016020; GO:0016021
HmN_000617700	CDC7 cell division cycle 7	-0.721251	725.493	1199.76	6.00115e-09	GO:0000166; GO:0004672; GO:0005524; GO:0006468; GO:0051301
HmN_000598800	Ankyrin 2,3:unc44	-0.724398	847.117	1402.14	2.46473e-08	GO:0005622; GO:0035556; GO:0005515
HmN_000801700	GYF domain containing protein	-0.726117	2359.45	3903.83	8.00189e-14	GO:0005515
HmN_000609100	Serine protein kinase ATM	-0.727439	265.55	441.157	6.99345e-06	GO:0000077; GO:0000166; GO:0000723; GO:0004674; GO:0005524; GO:0006281; GO:0006974; GO:0010212; GO:0016301; GO:0016310; GO:0016572; GO:0016740; GO:0016773; GO:0090399; GO:0005515
HmN_000515900	n/a	-0.729412	282.277	468.433	1.37017e-09	GO:0008168; GO:0005515
HmN_000386800	Protein phosphatase 1b	-0.730324	959.42	1592.38	3.49218e-07	GO:0000287; GO:0003824; GO:0004721; GO:0004722; GO:0006470; GO:0016787; GO:0030145; GO:0043169; GO:0046872
HmN_000798700	Transcription factor TFIIIB component B	-0.730802	383.697	634.24	1.29007e-08	GO:0000126; GO:0001026; GO:0003677; GO:0006359; GO:0006383
HmN_000334900	Transmembrane protein 68	-0.732659	326.943	545.643	2.66348e-07	GO:0016020; GO:0016021
HmN_002219400	n/a	-0.733349	544.173	903.273	2.57785e-06	GO:0008270; GO:0005622; GO:0005515
HmN_000441400	Lipoic acid synthetase	-0.733766	583.597	972.66	4.95353e-07	GO:0003824; GO:0009107; GO:0016992; GO:0051536; GO:0051539
HmN_000180500	Expressed protein	-0.733826	760.343	1268.05	2.38059e-06	n/a
HmN_000155300	Histone lysine n methyltransferase setb1	-0.734292	641.013	1067.87	8.53876e-10	GO:0003677; GO:0005634; GO:0005694; GO:0008168; GO:0008270; GO:0016740; GO:0018024; GO:0032259; GO:0034968; GO:0005515
HmN_000057200	Ctd nuclear envelope phosphatase 1	-0.734666	322.963	538.24	8.97068e-07	GO:0016311; GO:0016791
HmN_000610900	Nuclear distribution protein nude 1	-0.739327	533.98	893.857	3.18056e-07	GO:2000574
HmN_000120700	SID1 transmembrane family	-0.740057	810.97	1353.97	3.73744e-08	GO:0016020; GO:0016021; GO:0033227; GO:0051033
HmN_000104900	Expressed conserved protein	-0.740266	404.613	677.487	3.45492e-07	n/a
HmN_000019000	Remodeling and spacing factor 1	-0.741655	777.987	1300.75	2.15193e-07	GO:0008270; GO:0046872; GO:0006355; GO:0031213
HmN_000340900	Serine:threonine protein kinase SRPK1	-0.74272	2617.15	4381.93	3.39633e-07	GO:0000166; GO:0004672; GO:0005524; GO:0006468; GO:0016301; GO:0016310
HmN_000493500	Expressed conserved protein	-0.742723	1112.03	1862.63	2.28042e-12	n/a
HmN_000290500	Protin armadillo repeat	-0.74601	155.483	261.813	2.29587e-06	n/a
HmN_000026000	Expressed protein	-0.747276	910.51	1527.87	1.86639e-07	n/a
HmN_002023000	n/a	-0.748266	798.497	1341.31	2.84661e-06	n/a
HmN_000627600	Titin	-0.750191	8054.77	13549.6	1.26518e-14	n/a
HmN_000403900	Platelet activating factor acetylhydrolase IB	-0.75176	798.577	1347.67	2.6416e-10	GO:0008152; GO:0016787
HmN_001006800	Expressed protein	-0.752115	1009.94	1699.68	2.98463e-07	n/a
HmN_000678000	Mediator of RNA polymerase II transcription	-0.75302	477.933	808.113	2.20752e-09	GO:0003677; GO:0005634; GO:0006351
HmN_002124500	n/a	-0.753741	477.353	803.323	4.36341e-14	GO:0003779; GO:0007010
HmN_000774200	Protein slowmo	-0.753966	840.727	1420.63	2.64003e-07	GO:0005758
HmN_000098000	Lysosomal alpha mannosidase	-0.756472	354.807	599.243	2.94488e-06	GO:0003676; GO:0006139
HmN_000567200	Histone acetyltransferase	-0.756722	1501.45	2538.47	3.11883e-18	GO:0003723; GO:0004402; GO:0005634; GO:0006355; GO:0008152; GO:0016573; GO:0016740; GO:0016747; GO:0005515; GO:0005488
HmN_000447200	Origin recognition complex subunit 3	-0.757251	321.913	543.157	5.07357e-07	GO:0003677; GO:0005664; GO:0006260
HmN_000715400	Docking protein 3	-0.757919	326.373	550.637	5.80458e-10	n/a
HmN_000613500	Nuclear inhibitor of protein phosphatase 1	-0.758279	296.09	502.027	2.39628e-06	GO:0005515
HmN_000674500	Dual specificity mitogen activated protein	-0.759241	1433.22	2429.07	5.95151e-11	GO:0000166; GO:0004672; GO:0005524; GO:0006468; GO:0008270; GO:0046872
HmN_000684500	ATP dependent RNA helicase DHX8	-0.760246	856.53	1452.53	2.1146e-09	GO:0000166; GO:0003676; GO:0004386; GO:0005524; GO:0008026; GO:0008152; GO:0016787
HmN_000094900	NAChR subunit (ShAR1 beta2)	-0.760808	1932.09	3277.63	4.26306e-10	GO:0000166; GO:0003676
HmN_000848700	Nipped B protein (Delangin) (Scc2)	-0.761203	1009.17	1714.79	3.38746e-13	GO:0003682; GO:0010468; GO:0005488
HmN_000164400	n/a	-0.761334	1266.17	2147.26	2.10061e-10	GO:0017056; GO:0006913; GO:0005643
HmN_000188400	Expressed protein	-0.76161	532.253	902.043	3.01564e-06	GO:0016579; GO:0036459
HmN_000512900	Lupus la ribonucleoprotein	-0.761788	2022.83	3430.75	1.87061e-07	GO:0019013; GO:0030529
HmN_000476300	Expressed conserved protein	-0.762234	233.363	397.943	5.63091e-06	GO:0016020; GO:0016021
HmN_000090300	Carbonyl reductase 1	-0.76293	11605.5	19697.1	5.47627e-18	GO:0008152; GO:0016491; GO:0055114
HmN_000381600	Polyadenylate binding protein 2	-0.763023	1157.03	1968.15	5.54663e-06	GO:0000166; GO:0003676; GO:0003723; GO:1904247
HmN_000888300	Ubiquitin carboxyl terminal hydrolase BAP1	-0.763499	433.037	736.933	7.92694e-11	GO:0004843; GO:0005622; GO:0006511; GO:0016787
HmN_000133000	Leucine rich repeat serine:threonine protein	-0.763502	887.073	1505.32	7.61152e-15	GO:0004672; GO:0005524; GO:0005525; GO:0005622; GO:0006468; GO:0007264; GO:0005515
HmN_000777600	n/a	-0.763694	541.34	919.207	1.13823e-12	GO:0001164; GO:0001187; GO:0001188; GO:0006360; GO:0070860
HmN_000239200	Translation initiation factor eIF 2B subunit	-0.764843	1685.73	2866.75	1.08497e-09	GO:0003743; GO:0006413; GO:0044237
HmN_000908600	Dual specificity	-0.765414	922.443	1568.26	6.81152e-07	GO:0000166; GO:0004672; GO:0005524; GO:0006468
HmN_000343400	PIH1 domain containing protein 2	-0.765857	406.563	689.023	2.51398e-06	n/a
HmN_000439600	Family S9 non peptidase ue (S09 family)	-0.766558	720.177	1229.37	3.50554e-13	GO:0005515
HmN_000715800	Monocarboxylate transporter	-0.766794	220.74	376.537	6.03429e-09	GO:0016020; GO:0016021; GO:0055085
HmN_000745100	Ubiquitin carboxyl terminal hydrolase 4	-0.769268	891.913	1521.88	1.79023e-07	GO:0006511; GO:0016579; GO:0016787; GO:0036459
HmN_000718300	Poly	-0.771188	1578.65	2695.7	4.92665e-07	GO:0003677; GO:0003950; GO:0005634; GO:0006471; GO:0008270; GO:0016740; GO:0016757; GO:0051287
HmN_000047900	BAH domain and coiled coil containing 1	-0.773155	345.24	587.58	1.18449e-09	GO:0003682; GO:0030154
HmN_000456800	Zinc finger protein 782	-0.77384	683.28	1169.17	2.06198e-06	GO:0003676; GO:0046872
HmN_000873900	Expressed protein	-0.775234	2569.05	4393.9	6.33148e-19	n/a
HmN_000647100	Protein associating with the carboxyl terminal	-0.7775	647.127	1109.26	2.48977e-07	GO:0004672; GO:0005524; GO:0006468; GO:0005488
HmN_000347600	Ring finger protein 170	-0.777899	291.16	499.697	1.98391e-06	GO:0016020; GO:0016021
HmN_000226000	n/a	-0.778207	1274.37	2185.45	1.15808e-06	GO:0008270
HmN_000770500	Phosphatidylinositol 3 and 4 kinase	-0.780295	409.847	702.76	1.79483e-07	GO:0000166; GO:0004674; GO:0005524; GO:0006468; GO:0016301; GO:0016310; GO:0016740; GO:0016773; GO:0005515; GO:0005488
HmN_000691800	Subfamily M14A unassigned peptidase	-0.781156	2372.06	4077.94	4.81348e-23	GO:0004180; GO:0004181; GO:0006508; GO:0008270
HmN_000765500	Ubiquitin conjugation factor e4 a	-0.782963	2196.75	3781.67	6.88743e-09	GO:0000151; GO:0004842; GO:0006511; GO:0016567; GO:0016874; GO:0034450
HmN_000422200	Nucleoporin nup53	-0.784415	831.273	1432.75	8.04511e-07	GO:0005089; GO:0035023; GO:0043547; GO:0003676
HmN_000120100	Leukotriene a4 hydrolase	-0.784707	2554.35	4400.71	3.30885e-21	GO:0006508; GO:0008237; GO:0008270; GO:0016787; GO:0019370; GO:0005488
HmN_000354000	Protein lin 54	-0.785336	654.49	1130.28	1.62313e-10	n/a
HmN_000714900	Zinc finger CCCH domain containing protein 3	-0.789491	526.403	911.893	1.21972e-06	GO:0046872
HmN_002173000	n/a	-0.792345	513.743	891.493	4.66445e-10	n/a
HmN_000148700	Pyruvate dehydrogenase	-0.79387	370.78	640.193	8.68795e-11	GO:0003824; GO:0004722; GO:0006470
HmN_000699900	Polymerase delta interacting protein 2	-0.794671	865.677	1504.4	1.26193e-07	GO:0003677
HmN_000066100	CCR4 NOT transcription complex subunit 7	-0.795574	1399.75	2432.58	5.3025e-12	GO:0003676; GO:0005634
HmN_000473900	Polyribonucleotide 5' hydroxyl kinase Clp1	-0.799803	581.503	1014.62	3.42201e-08	GO:0000166; GO:0005524; GO:0005634; GO:0006397; GO:0006508; GO:0008234; GO:0016301; GO:0016310; GO:0031124
HmN_000160700	Expressed conserved protein	-0.799807	346.163	604.913	9.65861e-08	n/a
HmN_000830400	DNA binding death effector domain containing protein	-0.800456	646.06	1127.34	1.35442e-09	n/a
HmN_000190500	Nk6	-0.800629	540.567	944	4.31972e-09	GO:0003677; GO:0005634; GO:0006355; GO:0043565
HmN_000370800	Mitochondrial carrier triple repeat protein	-0.800667	582.34	1015.82	6.89792e-09	GO:0006810; GO:0016020; GO:0016021
HmN_000511900	Ubiquitin protein ligase BRE1	-0.802528	3568.29	6225.73	2.93395e-09	GO:0008152; GO:0016874
HmN_000728600	Expressed conserved protein	-0.803099	2145.9	3748.19	6.26152e-06	n/a
HmN_000527000	E3 ubiquitin protein ligase HUWE1	-0.803468	2224.35	3884.55	3.9072e-09	GO:0004842; GO:0008152; GO:0016567; GO:0016874
HmN_000127400	Centrosomal protein of 97 kDa	-0.805199	228.433	401.367	2.69168e-06	GO:0005515
HmN_002217600	n/a	-0.805325	963.72	1684.85	4.47672e-08	GO:0003677
HmN_000647900	n/a	-0.805369	23500.3	41078.5	7.84984e-27	n/a
HmN_000344200	n/a	-0.805692	966.517	1690.73	3.26526e-23	GO:0003677; GO:0005524; GO:0016787; GO:0000287; GO:0008253; GO:0005737; GO:0004386; GO:0008270; GO:0000184
HmN_000612900	Expressed protein	-0.812994	1968.28	3459.86	7.78304e-15	n/a
HmN_000006100	n/a	-0.817182	231.903	409.737	1.52612e-07	GO:0016787
HmN_002161300	n/a	-0.817489	3566.93	6290.07	4.13497e-14	GO:0016746; GO:0008152
HmN_000166900	Expressed protein	-0.818329	277.083	490.4	1.67992e-08	n/a
HmN_000103600	C2 calcium dependent membrane targeting	-0.819168	468.15	824.593	4.4257e-06	n/a
HmN_000283500	Lupus la ribonucleoprotein	-0.819335	2815.43	4969.45	1.07585e-16	GO:0003723; GO:0005634; GO:0006396; GO:0019013; GO:0030529
HmN_000826200	GYF domain containing protein	-0.819736	1284.3	2267.55	3.42739e-08	GO:0005515
HmN_000586700	Piezo-type mechanosensitive ion channel component	-0.820065	1101.16	1946.42	2.64306e-21	GO:0008381; GO:0016020; GO:0016021; GO:0034220
HmN_000834500	F box:WD repeat containing protein 1A	-0.821532	1185.92	2097.38	2.78249e-08	GO:0046983; GO:0005515
HmN_000186800	n/a	-0.823711	208.767	369.823	1.25528e-07	GO:0016020; GO:0016021
HmN_000750300	MICAL protein 2	-0.82447	400.49	712.707	3.00906e-09	GO:0017137; GO:0032456
HmN_000364800	n/a	-0.826667	2284.09	4053.31	3.67731e-13	GO:0008270
HmN_002210600	n/a	-0.82679	322.253	572	2.4218e-09	n/a
HmN_000323600	Protein frg1	-0.828294	558.68	994.173	7.44788e-07	n/a
HmN_002045300	n/a	-0.829089	409.69	729.97	3.04192e-10	n/a
HmN_002099000	n/a	-0.829568	4243.65	7545.22	9.61434e-11	GO:0005515; GO:0007165
HmN_000088800	Vaccinia related kinase 1	-0.834332	576.61	1031.09	3.59253e-10	GO:0000166; GO:0004672; GO:0005524; GO:0006468; GO:0016301; GO:0016310
HmN_000135400	T complex protein 11 protein 1	-0.834624	497.467	887.077	1.8307e-10	n/a
HmN_002131100	n/a	-0.835863	1778.24	3177.02	1.47926e-09	GO:0000287; GO:0004749; GO:0009165
HmN_000591800	Pleiotropic regulator 1	-0.838156	904.567	1619.63	2.41083e-07	GO:0005515
HmN_000887500	Expressed conserved protein	-0.838357	1870.27	3346.49	1.35913e-09	n/a
HmN_000614400	Reticulon-like protein	-0.83932	1722.71	3081.86	3.57609e-34	GO:0016020; GO:0016021
HmN_000720700	CD36 class B scavenger receptor	-0.843468	1988.89	3570.95	8.59485e-17	GO:0007155; GO:0016020; GO:0016021
HmN_002011200	n/a	-0.844486	2013.57	3617.25	3.34277e-19	n/a
HmN_002163100	n/a	-0.844913	393.78	706.37	3.36043e-09	GO:0005515
HmN_000163200	Ubiquitin carboxyl-terminal hydrolase	-0.845699	1524.5	2741.83	1.24359e-09	GO:0006511; GO:0016579; GO:0016787; GO:0036459; GO:0005515
HmN_000441300	Jumonji, AT rich interactive domain 1B	-0.845967	253.313	455.893	8.1143e-06	GO:0003677; GO:0005634; GO:0008270; GO:0016706; GO:0046872; GO:0055114
HmN_000226600	Transgelin	-0.84859	7156.65	12890.4	1.9193e-41	GO:0005515
HmN_000507600	Microtubule-associated serine/threonine-protein kinase	-0.849041	1180.12	2126.94	9.09769e-10	GO:0000287; GO:0004672; GO:0004674; GO:0005524; GO:0006468; GO:0016301; GO:0016310; GO:0016740; GO:0005515
HmN_000947800	Pre mRNA splicing factor syf2	-0.849945	862.95	1558.31	3.34249e-12	n/a
HmN_000146400	n/a	-0.850046	225.82	408.7	8.70166e-11	n/a
HmN_000248700	Double strand break repair protein MRE11A	-0.852067	801.827	1450.63	8.05137e-07	GO:0004518; GO:0004519; GO:0004527; GO:0005634; GO:0006259; GO:0006281; GO:0006302; GO:0006974; GO:0016787; GO:0030145; GO:0046872; GO:0051321; GO:0090305; GO:0008408; GO:0030870
HmN_000065100	Actin protein 8	-0.855166	324.197	589.82	1.96474e-10	GO:0016020; GO:0016021
HmN_000476000	Zinc finger FYVE domain containing protein 9	-0.856694	465.283	844.083	6.12727e-20	GO:0046872
HmN_000680900	HEAT repeat containing protein 2	-0.857277	490.35	886.927	6.66991e-08	GO:0005488
HmN_002011400	n/a	-0.858717	1257.65	2283.01	1.93415e-10	GO:0008234; GO:0006508
HmN_000406200	Vacuolar protein sorting associated protein 41	-0.859068	581.773	1056.04	2.94488e-06	GO:0005622; GO:0006886; GO:0008270; GO:0016192; GO:0046872; GO:0005515
HmN_000575700	Cysteine:serine rich nuclear protein 1	-0.859547	376.61	683.073	1.15464e-10	n/a
HmN_000044700	Expressed protein	-0.861166	960.01	1747.19	4.43826e-07	n/a
HmN_000039300	WD repeat protein	-0.861716	366.037	667.02	1.18953e-08	GO:0005515
HmN_000549400	Bromodomain containing protein 8	-0.862486	1327.88	2416.33	9.75411e-15	n/a
HmN_000549500	Homeodomain	-0.862653	548.817	1000.06	2.31951e-12	GO:0003677
HmN_002155800	n/a	-0.865993	552.543	1004.12	2.69147e-14	n/a
HmN_000806600	Cleavage and polyadenylation specificity factor	-0.866221	616.887	1125.42	3.12853e-11	n/a
HmN_000228900	n/a	-0.868222	1821.58	3329.02	2.87614e-18	GO:0006886; GO:0017119
HmN_000621100	Ell associated factor 1	-0.868847	283.65	521.243	3.50449e-10	GO:0006355; GO:0032783
HmN_000062300	Protein will die slowly	-0.87341	939.267	1724.63	2.80007e-11	GO:0005515
HmN_002216700	n/a	-0.87596	604.73	1112.42	3.57576e-18	n/a
HmN_000716800	Phosphatase and tensin	-0.876977	516.343	947.72	5.59718e-19	n/a
HmN_000038000	Mediator of RNA polymerase II transcription	-0.878873	291.65	538.29	4.4758e-06	GO:0001104; GO:0006357; GO:0016592
HmN_000006000	n/a	-0.881378	1312.01	2416.32	8.74359e-23	GO:0003677; GO:0003918; GO:0005524; GO:0006265; GO:0006259
HmN_000078500	n/a	-0.881955	1387.71	2561.09	1.76434e-08	n/a
HmN_000236200	Calcium activated potassium channel variant	-0.883905	870.28	1608.48	1.26008e-19	GO:0006813; GO:0015269; GO:0016020; GO:0016021; GO:0060072; GO:0071805
HmN_000363200	n/a	-0.884961	173.98	321.493	9.99966e-09	GO:0046872; GO:0003676
HmN_000371600	Non-specific serine/threonine protein kinase	-0.888946	1020.82	1889.39	8.40433e-12	GO:0000166; GO:0004672; GO:0004674; GO:0005524; GO:0005622; GO:0006468; GO:0016301; GO:0016310; GO:0016740; GO:0035556; GO:0046872; GO:0005515
HmN_000561700	Transmembrane protein 56	-0.889275	927.137	1720.91	3.24515e-13	GO:0016020; GO:0016021
HmN_000082600	Myophilin	-0.889355	3383.39	6274.34	9.4434e-13	GO:0005515
HmN_000250000	DNA polymerase epsilon catalytic subunit	-0.889537	907.633	1683.47	5.16109e-13	GO:0009058; GO:0016779
HmN_000892700	Lim like	-0.891714	111.44	206.827	1.38978e-06	GO:0003677; GO:0005634; GO:0006355; GO:0008270; GO:0043565; GO:0046872
HmN_000599700	Mitotic checkpoint protein PRCC, C terminal	-0.89197	257.997	480.877	8.10424e-11	n/a
HmN_000196000	DNA:RNA binding protein KIN17	-0.892455	1346.18	2500.01	9.90283e-31	n/a
HmN_000110800	Histone lysine n methyltransferase suv420h1	-0.897763	230.097	429.337	2.34609e-07	GO:0008168; GO:0016740; GO:0032259; GO:0005515
HmN_000228000	Ankyrin repeat and zinc finger domain containing protein	-0.899873	607.347	1135.77	2.78545e-17	GO:0046872; GO:0003676; GO:0005515
HmN_000309300	Metastasis associated protein 1 (Mta1)	-0.900619	664.783	1241.64	3.79938e-08	GO:0003677; GO:0003682; GO:0046872; GO:0003676
HmN_000681000	Fetal alzheimer antigen, falz	-0.903707	638.017	1193.91	4.10213e-12	GO:0008270; GO:0046872; GO:0005515
HmN_000377000	Ribosomal protein L18	-0.903981	447.583	838.543	1.80507e-09	GO:0005840; GO:0016020; GO:0016021
HmN_000507400	Calcineurin b	-0.905065	871.313	1632.46	2.68733e-26	GO:0005509
HmN_000490800	Leucine rich repeats containing F box	-0.905605	1183.32	2215.6	1.107e-17	GO:0005515
HmN_000360300	Ag5	-0.906862	7878.13	14791.1	9.23397e-09	GO:0004252; GO:0006508
HmN_000586300	Homocysteine responsive endoplasmic	-0.912151	608.937	1148.31	4.6554e-21	GO:0016020; GO:0016021; GO:0005515
HmN_000414800	Lysine specific demethylase 5B	-0.913393	1617.11	3050.77	1.07911e-09	GO:0008168; GO:0008270; GO:0032259; GO:0046872; GO:0005515
HmN_002109600	n/a	-0.913525	345.743	653.53	1.10254e-11	n/a
HmN_002252400	n/a	-0.915427	958.26	1808.92	2.87441e-09	GO:0016021
HmN_000401600	n/a	-0.918487	667.04	1262.62	1.56201e-28	n/a
HmN_000278200	Basic leucine zipper (BZIP) transcription	-0.919254	154.937	294.293	9.08556e-08	GO:0003677; GO:0003700; GO:0005634; GO:0006351; GO:0006355; GO:0043565
HmN_000406500	n/a	-0.91977	131.153	247.413	5.24928e-07	n/a
HmN_000561000	Polyhomeotic protein 2	-0.920381	1226.77	2323.4	1.22122e-20	GO:0005515
HmN_000394700	DNA polymerase	-0.921355	405.973	768.857	7.71697e-15	GO:0000166; GO:0001882; GO:0003676; GO:0003677; GO:0003887; GO:0006260; GO:0006270; GO:0008408; GO:0016740; GO:0016779; GO:0071897; GO:0090305
HmN_000701900	C Jun amino terminal kinase interacting protein	-0.921812	1794.96	3402.64	1.76058e-10	GO:0016301; GO:0016310
HmN_000008000	Tubulin epsilon chain	-0.921945	153.54	290.717	4.29692e-06	GO:0000166; GO:0003924; GO:0005525; GO:0005874; GO:0007017; GO:0008152
HmN_000337600	n/a	-0.922561	699.763	1327.94	2.42963e-07	GO:0005515
HmN_000633000	Tyrosine protein phosphatase non receptor type	-0.923146	1429.67	2712.97	7.39019e-13	GO:0005856
HmN_000286200	Ankyrin	-0.924454	172.6	328.737	2.05623e-06	GO:0005515
HmN_000432000	RNA polymerase II associated protein 3	-0.924832	411.963	781.887	8.30837e-20	GO:0005515
HmN_002022800	n/a	-0.924992	646.777	1231.24	1.5012e-12	GO:0005515
HmN_000515000	Mitogen activated protein kinase binding protein	-0.926408	410.25	782.663	4.91463e-08	GO:0016301; GO:0016310; GO:0005515
HmN_000768500	Zinc finger, DHHC type containing 6	-0.926807	924.41	1759.54	2.70784e-14	GO:0016020; GO:0016021
HmN_000045500	n/a	-0.926885	740.867	1410.46	5.8097e-10	GO:0005515
HmN_000425800	Aldo keto reductase	-0.927986	254.473	486.487	7.66856e-10	GO:0016491; GO:0055114
HmN_000086600	Serine/threonine-protein phosphatase	-0.93039	1890.31	3603.99	2.78529e-12	GO:0004721; GO:0006470; GO:0008152; GO:0016787
HmN_000757700	Condensin complex subunit 3	-0.934723	509.613	975.4	3.34798e-08	GO:0000796; GO:0007076; GO:0005488
HmN_000631900	Expressed protein	-0.934928	317.017	607.707	2.37836e-06	n/a
HmN_000100300	Autophagy protein 5	-0.935517	416.747	800.057	5.44049e-11	GO:0005737; GO:0006914; GO:0016020; GO:0034045
HmN_000495600	Mitogen-activated protein kinase kinase kinase 9	-0.936287	395.97	759.803	6.1814e-08	GO:0000165; GO:0000186; GO:0004672; GO:0004709; GO:0005524; GO:0005622; GO:0006468; GO:0016301; GO:0016310; GO:0016740; GO:0005515
HmN_000495400	Expressed conserved protein	-0.93714	667.753	1282.69	1.0381e-14	n/a
HmN_000496600	n/a	-0.937946	557.003	1067.35	8.56802e-14	GO:0005515
HmN_000735100	SH3 domain binding protein 5	-0.939391	331.03	636.547	6.48657e-11	GO:0035556
HmN_000599000	n/a	-0.940846	340.55	655.403	1.08747e-07	n/a
HmN_000463300	Suppression of tumorigenicity	-0.945917	481.93	929.727	5.35507e-16	GO:0016020; GO:0016021; GO:0005515
HmN_000121900	UDP galactose 4 epimerase	-0.9474	740.13	1427.75	4.96561e-12	n/a
HmN_000665000	BAG family molecular chaperone regulator 4	-0.94789	329.783	635.533	3.63667e-09	GO:0051087; GO:0005515
HmN_000853300	n/a	-0.948397	487.74	941.66	1.07195e-06	GO:0005515; GO:0008080; GO:0004402; GO:0006355; GO:0005634
HmN_000641400	Expressed protein	-0.949914	258.167	497.74	1.63775e-10	n/a
HmN_002161600	n/a	-0.9509	352.27	680.727	1.45485e-09	n/a
HmN_000972600	Ribosomal protein S6 kinase alpha 2	-0.953256	649.983	1261.41	1.24991e-08	GO:0000166; GO:0004672; GO:0004674; GO:0005524; GO:0006468; GO:0016301; GO:0016310; GO:0016740
HmN_000250300	Transcription elongation factor A (SII), 1	-0.956492	910.77	1770.99	1.52646e-16	GO:0003676; GO:0003677; GO:0003746; GO:0005634; GO:0006351; GO:0006355; GO:0006414; GO:0008270; GO:0005515
HmN_002152900	n/a	-0.956771	600.717	1165.29	1.44742e-08	n/a
HmN_000706600	AKT interacting protein	-0.95784	446.19	865.42	7.34327e-25	n/a
HmN_000249700	Zinc finger, HIT type	-0.958322	208.063	407.193	2.76594e-08	GO:0031011
HmN_002180300	n/a	-0.96128	544.41	1063.99	5.57391e-16	n/a
HmN_000218500	Receptor protein-tyrosine kinase	-0.961527	698.247	1359.81	1.75618e-13	GO:0000166; GO:0004672; GO:0004713; GO:0004714; GO:0005524; GO:0006468; GO:0007169; GO:0016020; GO:0016021; GO:0016301; GO:0016310; GO:0016740; GO:0018108; GO:0005515
HmN_000486500	Histone-lysine N-methyltransferase	-0.964596	811.15	1584.58	2.40526e-10	GO:0005634; GO:0008168; GO:0016740; GO:0018024; GO:0032259; GO:0051568; GO:0005515
HmN_000741000	WW domain containing protein	-0.965201	942.663	1841.84	3.4369e-15	GO:0005515
HmN_000257000	n/a	-0.965834	243.94	479.23	1.20384e-10	n/a
HmN_000106300	Cytidine and deoxycytidylate deaminase	-0.966372	287.453	562.2	1.51128e-10	GO:0003824; GO:0008152; GO:0008270
HmN_000663500	Nk5/H6 homeo box	-0.968704	562.813	1101.84	2.71171e-10	GO:0003677; GO:0005634; GO:0006355; GO:0008270; GO:0043565; GO:0046872; GO:0005515
HmN_000495500	Ribonucleoside diphosphate reductase subunit	-0.969248	1203.56	2360.38	7.57878e-14	GO:0009186; GO:0016020; GO:0016021; GO:0016491; GO:0055114; GO:0009263
HmN_000576400	n/a	-0.971395	293.977	578.877	1.69189e-10	GO:0005515
HmN_000813800	n/a	-0.971498	413.33	811.173	8.50794e-06	GO:0005515; GO:0046872; GO:0005488
HmN_000429700	Semaphorin 5B	-0.97489	890.547	1750.24	1.21018e-13	GO:0016020; GO:0016021; GO:0005515
HmN_000847000	n/a	-0.975553	240.387	474.21	4.08303e-07	n/a
HmN_000135500	Ubiquitin conjugating enzyme E2 J1	-0.978611	852.617	1685.2	3.19514e-24	GO:0016020; GO:0016021
HmN_000126900	n/a	-0.979142	239.763	473.497	1.75729e-07	GO:0005488
HmN_000202000	n/a	-0.980265	2231.55	4407.79	4.51381e-12	GO:0004190; GO:0016021
HmN_000565800	n/a	-0.980427	110.34	218.923	4.46444e-07	n/a
HmN_002061900	n/a	-0.983113	123.223	245.087	9.80289e-06	GO:0003924; GO:0005525
HmN_000065800	Inner nuclear membrane protein man1	-0.987537	1047.86	2079.03	2.34514e-15	GO:0005639; GO:0016020; GO:0016021; GO:0001525; GO:0006997; GO:1902531; GO:0005637
HmN_000616700	Interferon inducible double stranded	-0.98773	487.987	970.607	4.52565e-25	GO:0003725; GO:0035197; GO:0030422; GO:0031054; GO:0035280; GO:0046782; GO:0016442
HmN_002150500	n/a	-0.989006	417.04	830.717	4.91965e-09	n/a
HmN_000603100	Kinetochore protein ndc80	-0.98942	237.22	471.28	1.63662e-12	n/a
HmN_000522100	Polyglutamine binding protein 1	-0.990629	292.383	582.227	8.27527e-09	GO:0005515
HmN_000572600	n/a	-0.991095	386.983	767.257	5.15609e-20	n/a
HmN_000381000	Cullin 5	-0.993307	1496.33	2982.34	3.27762e-13	GO:0006511; GO:0031625
HmN_002044600	n/a	-0.994047	600.52	1196.82	1.86324e-09	GO:0005515
HmN_000124800	Activating transcription factor 7 interacting	-0.996592	509.76	1020.03	5.82382e-10	GO:0005515
HmN_000705200	Ran binding protein 9	-0.997394	1028.61	2054.8	1.47387e-11	GO:0005515
HmN_000230800	Negative elongation factor A	-0.99844	608.96	1218.94	6.33727e-11	GO:0003746; GO:0006414; GO:0016787; GO:0005515
HmN_000669200	Phosphopantothenate cysteine ligase	-1.00042	356.273	711.35	5.32828e-12	GO:0008152; GO:0016874
HmN_000131000	NOT, transcription regulatory protein	-1.00111	1132.17	2265.75	3.32939e-15	GO:0005634; GO:0006355
HmN_000783300	Zinc finger, C2H2 type	-1.00253	347.223	697.65	4.1417e-06	n/a
HmN_000774300	n/a	-1.00291	519.853	1043.36	5.41942e-10	n/a
HmN_000247600	Expressed protein	-1.00333	1160.56	2326.43	3.91901e-18	GO:0000166; GO:0003676; GO:0003723; GO:0046872
HmN_002175600	n/a	-1.00346	159.953	319.273	3.46884e-09	GO:0005515
HmN_000687400	Protein lin 7 B	-1.00458	503.643	1011.41	5.22781e-08	GO:0005515
HmN_000270000	Multiple inositol polyphosphate phosphatase	-1.00476	703.863	1411.58	5.63924e-12	GO:0003993; GO:0016020; GO:0016021; GO:0016311
HmN_000347900	6 phosphofructo 2 kinase:fructose 2	-1.0059	489.097	984.883	5.71477e-20	GO:0003824; GO:0003873; GO:0005524; GO:0006000; GO:0006003; GO:0008152; GO:0016301; GO:0016310; GO:0046835
HmN_000467100	Transcriptional repressor NF X1	-1.0078	641.12	1294.53	5.1397e-12	GO:0003700; GO:0005634; GO:0006355; GO:0008270; GO:0003676
HmN_000200400	Arginyl-tRNA--protein transferase 1	-1.00865	2187.53	4405.33	9.66101e-20	GO:0004057; GO:0016598; GO:0016740; GO:0016746
HmN_000262400	n/a	-1.0096	1875.14	3778.54	8.93349e-15	GO:0005515
HmN_000696200	n/a	-1.01086	637.75	1286.94	4.42772e-24	GO:0005515; GO:0003676
HmN_000930800	Peptidase C19, ubiquitin carboxyl terminal hydrolase 2	-1.01135	453.597	912.96	4.16822e-15	GO:0006511; GO:0016579; GO:0016787; GO:0036459
HmN_000534600	Copine 9	-1.01304	232.143	472.133	6.54896e-06	n/a
HmN_000434600	n/a	-1.01385	240.127	484.12	6.06439e-14	GO:0016020; GO:0016021
HmN_000572900	BTB:POZ domain containing protein 10	-1.01425	1126.24	2277.11	3.53895e-08	n/a
HmN_000599400	Neural cell expressed, developmentally	-1.01556	775.403	1566.75	6.03185e-11	GO:0004842; GO:0008152; GO:0016567; GO:0016874; GO:0005515
HmN_000410200	Transcriptional regulator ATRX	-1.01623	1952.81	3951.98	5.68595e-22	GO:0005524; GO:0005674; GO:0006366; GO:0006367
HmN_000590700	Hexokinase	-1.01656	1127.97	2283.16	4.64697e-14	GO:0000166; GO:0001678; GO:0004396; GO:0005524; GO:0005536; GO:0005623; GO:0005975; GO:0006096; GO:0016301; GO:0016310; GO:0016740; GO:0016773; GO:0046835
HmN_000586800	DNA helicase	-1.01796	1529.34	3097.81	3.52619e-18	GO:0000166; GO:0003677; GO:0003678; GO:0004386; GO:0005524; GO:0005634; GO:0006260; GO:0006270; GO:0016787; GO:0032508; GO:0042555
HmN_002109500	n/a	-1.02071	282.063	573.227	2.1605e-06	n/a
HmN_000258900	Collagen alpha 1(IV) chain	-1.02481	2704.86	5510.67	2.91655e-08	GO:0005201; GO:0005578; GO:0005581; GO:0016020; GO:0016021
HmN_000033300	Zinc finger protein YGR067C	-1.02488	361.887	735.91	1.05713e-09	GO:0003676; GO:0046872
HmN_000436000	n/a	-1.027	758.553	1548.51	6.72862e-10	GO:0005634
HmN_002005800	n/a	-1.03206	690.233	1413.23	1.54146e-12	GO:0000166; GO:0016021; GO:0016887; GO:0006812
HmN_000057400	Adenylate kinase 7	-1.03342	547.927	1122.24	8.60817e-13	GO:0005524; GO:0006139; GO:0016301; GO:0016310; GO:0019205; GO:0004017; GO:0004127
HmN_000235300	n/a	-1.03979	556.493	1145.31	2.34472e-06	n/a
HmN_000234200	Sterile alpha motif type	-1.04351	620.183	1280.42	8.50796e-13	GO:0005515
HmN_000618400	n/a	-1.04614	222.037	457.72	1.58763e-08	GO:0005515; GO:0004672; GO:0005524; GO:0006468
HmN_000910900	Fragile site associated protein, C terminal	-1.04949	1194.82	2476.21	9.69186e-33	n/a
HmN_000616200	Protein-tyrosine-phosphatase	-1.05163	310.217	644.153	1.21352e-07	GO:0004721; GO:0004725; GO:0006470; GO:0016311; GO:0016787; GO:0016791; GO:0035335
HmN_000093000	n/a	-1.05273	841.247	1747.64	4.55787e-10	n/a
HmN_000767600	n/a	-1.05361	287.927	598.15	2.01077e-15	n/a
HmN_002124400	n/a	-1.05591	299.313	623.59	8.87096e-06	n/a
HmN_000152100	Polymerase delta interacting protein 3	-1.05635	984.407	2051.96	6.03744e-11	GO:0000166; GO:0003676; GO:0003723; GO:0006406
HmN_000333200	Centromere specific histone H3 CENP A	-1.05636	775.44	1617.12	4.24648e-07	GO:0000786; GO:0003677; GO:0005634; GO:0005694; GO:0046982
HmN_000607200	n/a	-1.05768	116.747	244.7	9.7425e-09	n/a
HmN_000167800	Protein N terminal asparagine amidohydrolase	-1.05991	328.733	687.38	1.16174e-18	GO:0008152; GO:0008418; GO:0016787
HmN_000797000	Atp dependent rna helicase ddxx	-1.06036	6431.93	13424.9	3.78378e-17	GO:0000166; GO:0003676; GO:0004386; GO:0005524; GO:0008152; GO:0016787
HmN_000817100	Polycomb group ring finger protein 3	-1.06069	183.49	384.517	6.58885e-08	n/a
HmN_000344300	Structure specific endonuclease subunit	-1.06159	141.017	297.063	1.97578e-07	GO:0004519; GO:0090305
HmN_000690000	GRB2 associated binding protein 3	-1.06174	521.853	1091.63	1.02108e-09	n/a
HmN_000573700	Annexin	-1.06318	241.133	501.46	3.79743e-15	GO:0005509; GO:0005544
HmN_000646300	Cohesin subunit SA 1	-1.06396	808.073	1690.21	7.07658e-09	GO:0005488
HmN_000774500	n/a	-1.06624	139.733	292.17	1.49298e-07	GO:0003676; GO:0015074
HmN_000334700	Zinc finger MYM type protein 3	-1.06736	1447.25	3037.26	8.99967e-16	n/a
HmN_000743800	Cell cycle checkpoint protein rad17	-1.06773	161.833	341.017	1.6291e-07	GO:0005634; GO:0006281; GO:0007049
HmN_000452400	DNA (Apurinic or apyrimidinic site) lyase	-1.06841	831.363	1748.82	1.71646e-19	GO:0003677; GO:0004518; GO:0004519; GO:0005622; GO:0006281; GO:0016829; GO:0090305
HmN_000672200	Snurportin 1	-1.06989	461.25	973.027	2.21814e-11	n/a
HmN_000002100	Zinc finger, RING type	-1.07177	241.023	507.32	2.20752e-09	GO:0008270; GO:0046872
HmN_000284500	Mediator of RNA polymerase II transcription	-1.07328	266.127	559.9	1.82034e-11	GO:0001104; GO:0006357; GO:0016592
HmN_000864900	Dual specificity protein phosphatase 14	-1.07342	81.6433	173.143	9.73907e-07	GO:0004725; GO:0006470; GO:0008138; GO:0016311; GO:0016787; GO:0016791; GO:0035335
HmN_000838900	Nuclear receptor corepressor	-1.07418	731.327	1540.12	8.7168e-15	GO:0003677; GO:0005634
HmN_000458700	Centrosomal protein of 135 kDa	-1.07644	234	493.26	7.20972e-08	n/a
HmN_000495900	Low density lipoprotein receptor (Ldl)	-1.07817	350.5	742.957	6.74909e-09	GO:0005515
HmN_000815100	n/a	-1.08233	231.707	490.96	8.67112e-07	n/a
HmN_000557900	TAF3 RNA polymerase II, TATA box binding protein	-1.08313	263.497	558.69	1.63299e-08	GO:0008270; GO:0046872
HmN_000489000	Zinc finger protein 668	-1.08403	154.253	327.947	2.3449e-10	GO:0003676; GO:0046872
HmN_000499600	Histone acetyltransferase	-1.08462	456.367	969.237	2.56471e-24	GO:0004402; GO:0005634; GO:0006355; GO:0008152; GO:0008270; GO:0016573; GO:0016740; GO:0016747; GO:0046872
HmN_000524900	ATP binding cassette sub family B	-1.08821	543.87	1160.28	3.58404e-20	GO:0000166; GO:0005524; GO:0006810; GO:0008152; GO:0016020; GO:0016021; GO:0016887; GO:0042626; GO:0055085
HmN_000400800	MORC family CW type zinc finger protein 2B	-1.09147	808.527	1726.15	6.68995e-14	GO:0008270
HmN_000651200	YT521 B protein	-1.09467	2947.02	6301.37	4.21341e-14	GO:0005515; GO:0003723
HmN_000136000	Zinc finger protein	-1.09721	252.923	542.51	1.39092e-07	GO:0003676; GO:0046872
HmN_002148800	n/a	-1.10199	327.117	703.223	4.01374e-10	n/a
HmN_002107000	n/a	-1.10425	461.977	990	1.21782e-23	GO:0000049; GO:0002098; GO:0034227; GO:0003676; GO:0005515
HmN_000477500	Ubiquitin protein ligase	-1.11234	765.533	1657.95	3.18247e-11	GO:0004842; GO:0008152; GO:0016567; GO:0016874; GO:0005515
HmN_000260800	Daxx protein	-1.11315	598.573	1297.07	3.21992e-14	n/a
HmN_000090800	Autophagy protein 9A	-1.1153	1160.3	2516.53	4.13075e-21	GO:0016020; GO:0016021
HmN_000170900	Annexin	-1.11537	5295.67	11485.3	2.47687e-26	GO:0005509; GO:0005544
HmN_000412900	Lsm14b protein	-1.11577	1856	4028.64	2.64442e-17	n/a
HmN_000062200	Growth hormone regulated TBC protein 1 A	-1.11614	350.117	761.273	2.17261e-13	n/a
HmN_000803200	Splicing factor arginine serine rich	-1.11615	141.08	305.143	1.38876e-11	GO:0000166; GO:0003676
HmN_000642000	Crossover junction endonuclease EME1	-1.11663	232.503	504.57	5.94613e-11	GO:0004519; GO:0090305; GO:0006281; GO:0005634; GO:0048476
HmN_000433100	Paired amphipathic helix protein sin3b	-1.11684	666.9	1450.53	7.54357e-23	GO:0006355
HmN_000132500	Bromodomain containing protein	-1.11704	359.5	783.913	3.6474e-10	GO:0005515
HmN_000393400	DNA RNA helicase, C terminal	-1.11739	563.07	1222.66	1.97734e-13	GO:0003676; GO:0004386; GO:0005524; GO:0008152; GO:0016787; GO:0003723; GO:0003724; GO:0006401
HmN_000402020	n/a	-1.11867	296.203	643.203	8.28813e-13	n/a
HmN_000778400	Choline phosphate cytidylyltransferase B	-1.11944	448.553	976.977	8.22038e-21	GO:0003824; GO:0009058; GO:0016740; GO:0016779
HmN_000054600	5' AMP activated protein kinase subunit beta 1	-1.12031	212.193	464.253	6.21091e-10	GO:0016301; GO:0016310; GO:0005515
HmN_000190300	n/a	-1.12043	172.957	378.72	6.42782e-07	n/a
HmN_000213900	Protein-tyrosine-phosphatase	-1.12081	233.4	506.663	3.21445e-13	GO:0004721; GO:0004725; GO:0006470; GO:0016020; GO:0016021; GO:0016311; GO:0016787; GO:0016791; GO:0035335; GO:0005515
HmN_000464800	Collagen type xv alpha	-1.12348	3123.63	6810.34	5.07815e-24	GO:0005198; GO:0005581; GO:0007155; GO:0031012
HmN_000861300	Transmembrane and ubiquitin	-1.12433	749.263	1631.85	5.77108e-28	GO:0016020; GO:0016021; GO:0005515
HmN_000579200	Receptor expression-enhancing protein	-1.12545	532.973	1164.11	2.74076e-18	GO:0016020; GO:0016021
HmN_000249500	Alpha 2 macroglobulin	-1.12665	2362.02	5167.88	3.97559e-13	GO:0004866; GO:0005576; GO:0005615; GO:0010951
HmN_000184600	n/a	-1.1298	713.397	1564.32	1.86329e-13	n/a
HmN_000479200	Mediator complex subunit	-1.13366	196.913	435.15	1.94811e-10	GO:0001104; GO:0006357; GO:0016592
HmN_000327600	Puromycin sensitive aminopeptidase	-1.13455	1947.95	4280.8	9.30481e-27	GO:0004177; GO:0006508; GO:0008237; GO:0008270
HmN_000691500	Lysosomal acid phosphatase	-1.13583	596.573	1315.99	2.30765e-13	GO:0003993; GO:0016020; GO:0016021; GO:0016311
HmN_000589300	n/a	-1.13611	330.72	726.657	7.34084e-14	n/a
HmN_000603300	n/a	-1.13702	129.487	286.927	1.52151e-08	n/a
HmN_000283400	n/a	-1.13781	1732.37	3814.89	2.58368e-28	n/a
HmN_000800800	N alpha acetyltransferase 40, NatD catalytic	-1.13841	235.337	520.227	4.25608e-08	GO:0008080; GO:0008152; GO:0016740
HmN_000770300	Long chain fatty acid coenzyme A ligase 1	-1.13949	1212.89	2674.81	1.3237e-24	GO:0003824; GO:0008152; GO:0016874
HmN_000538200	Tubulin specific chaperone E	-1.14632	775	1714.39	1.9531e-19	GO:0005515
HmN_002030600	n/a	-1.14814	219.53	486.903	1.57742e-09	n/a
HmN_002121400	n/a	-1.14999	671.567	1492.09	8.04301e-14	GO:0005488
HmN_000511100	MORN repeat containing protein 5	-1.15106	142.04	317.53	2.46497e-10	n/a
HmN_000047000	Aminoacylase-1	-1.1513	913.023	2028.87	1.22255e-20	GO:0004046; GO:0005737; GO:0006508; GO:0006520; GO:0008152; GO:0008237; GO:0016787; GO:0046872
HmN_000550700	Leukocyte receptor cluster	-1.15426	1661.21	3703.88	4.3862e-13	n/a
HmN_000931900	Cassette chromosome recombinase b	-1.1585	723.053	1618.44	4.20672e-26	n/a
HmN_002212500	n/a	-1.15929	274.607	614.313	2.42467e-11	GO:0005524; GO:0009058; GO:0016874; GO:0004326; GO:0009396
HmN_000505900	Expressed protein	-1.16366	528.407	1186.5	4.608e-16	n/a
HmN_000476800	Histone acetyltransferase	-1.16544	286.057	643.423	8.41511e-13	GO:0003700; GO:0004402; GO:0005634; GO:0006355; GO:0008152; GO:0008270; GO:0016573; GO:0016740; GO:0016747
HmN_000530200	Protein-L-isoaspartate O-methyltransferase	-1.16614	522.12	1173.94	3.92887e-12	GO:0004719; GO:0006464; GO:0006479; GO:0008168; GO:0016740; GO:0032259
HmN_000613700	n/a	-1.16765	322.267	728.56	4.62999e-06	GO:0003735; GO:0005622; GO:0005840; GO:0006412
HmN_000459200	Metal dependent phosphohydrolase, HD region	-1.16871	557.533	1253.37	1.87819e-14	GO:0008152; GO:0016787
HmN_000911500	DnaJ subfamily C 7	-1.16919	312.747	705.36	6.67067e-13	n/a
HmN_002003400	n/a	-1.17035	1971.55	4442.68	9.55132e-15	GO:0008168; GO:0006479
HmN_000609800	Single stranded dna binding protein	-1.17336	361.86	815.657	7.55855e-20	GO:0003697; GO:0005515
HmN_000662400	Nuclear receptor subfamily 1 group I member	-1.17888	447.673	1013.91	4.97185e-14	GO:0003677; GO:0003700; GO:0005634; GO:0006351; GO:0006355; GO:0008270; GO:0043401; GO:0043565; GO:0046872
HmN_000280300	Cathepsin L	-1.1797	2589.4	5868.83	9.6304e-23	GO:0006508; GO:0008233; GO:0008234; GO:0016020; GO:0016021; GO:0016787
HmN_000533800	Muscle myosin heavy chain	-1.18137	760.393	1721.72	1.76517e-33	GO:0000042; GO:0005622
HmN_000720800	DnaJ subfamily B	-1.18308	1611	3664.73	1.98034e-30	n/a
HmN_000564600	Cell division control protein 45	-1.18426	233.71	533.67	8.13054e-08	GO:0006270; GO:0051301
HmN_000246600	Neurobeachin	-1.18641	553.26	1263.07	2.62862e-13	n/a
HmN_002156400	n/a	-1.18931	209.44	480.21	4.13722e-10	n/a
HmN_000649400	Receptor protein serine/threonine kinase	-1.19052	899.26	2052.6	7.06253e-23	GO:0000166; GO:0004672; GO:0004674; GO:0004675; GO:0004702; GO:0005524; GO:0006468; GO:0007178; GO:0016020; GO:0016021; GO:0016301; GO:0016310; GO:0016740; GO:0023014
HmN_002165900	n/a	-1.19121	98.0033	224.54	2.5103e-07	n/a
HmN_000168900	Pleckstriny domain containing family M	-1.19131	292.46	671.987	2.40646e-13	n/a
HmN_000825400	Nuclear ribonuclease Z	-1.19206	275.26	630.49	1.8707e-18	n/a
HmN_000284300	n/a	-1.19248	164.06	374.737	3.40095e-10	GO:0005515
HmN_000905300	RNA exonuclease NEF sp	-1.19271	649.287	1485.96	6.39825e-24	GO:0003676; GO:0004527; GO:0090305
HmN_000800100	Serine:threonine protein kinase 17A	-1.19284	569.477	1302.59	1.32576e-12	GO:0004672; GO:0005524; GO:0006468; GO:0016301; GO:0016310
HmN_000613300	DnaJ subfamily B	-1.19493	716.52	1638.9	1.40447e-32	n/a
HmN_000715200	RNA polymerase II elongation factor ELL	-1.196	751.86	1723.86	2.44081e-20	GO:0003746; GO:0006368; GO:0006414; GO:0008023
HmN_000002300	n/a	-1.19626	116.24	266.02	5.66724e-10	n/a
HmN_000376600	Bloom syndrome protein	-1.19676	467.987	1073.22	2.2295e-16	GO:0000166; GO:0003676; GO:0003824; GO:0004386; GO:0005524; GO:0005622; GO:0006260; GO:0006281; GO:0006310; GO:0008026; GO:0016787; GO:0032508; GO:0043140; GO:0044237
HmN_000084000	Oxysterol-binding protein	-1.19909	689.187	1579.59	9.733e-29	GO:0006810; GO:0006869
HmN_000693300	n/a	-1.19964	391.927	903.24	1.25097e-09	n/a
HmN_000280700	Transcriptional repressor protein YY1	-1.20353	747.74	1724.63	1.48401e-23	GO:0003676; GO:0046872
HmN_000091000	Expressed protein	-1.20395	168.25	387.103	3.21854e-12	n/a
HmN_000048100	n/a	-1.20429	103.317	238.293	2.3722e-07	n/a
HmN_000028000	Fact complex subunit ssrp1	-1.20693	1426.3	3299.91	1.21863e-11	GO:0003677; GO:0005634
HmN_002104600	n/a	-1.20735	874.563	2019.88	7.09196e-25	n/a
HmN_000161000	n/a	-1.20892	146.89	340.507	1.06735e-06	GO:0005216; GO:0006811; GO:0055085; GO:0016020; GO:0005249; GO:0006813; GO:0008076
HmN_000612200	n/a	-1.20961	203.987	472.183	4.64554e-11	n/a
HmN_000805900	Transcription initiation factor TFIID subunit 1	-1.21368	568.687	1318.42	8.43055e-21	GO:0003743; GO:0006413; GO:0005515
HmN_002255300	n/a	-1.21591	412.957	959.46	2.4642e-17	GO:0003676; GO:0015238; GO:0015297; GO:0006855; GO:0055085; GO:0016020
HmN_000258500	Uveal autoantigen with coiled coil domains	-1.21594	361.373	839.36	9.97594e-14	n/a
HmN_000106600	WD repeat containing protein 27	-1.21843	60.29	140.79	3.53083e-06	GO:0005515
HmN_000774800	OTU domain containing protein 3	-1.21876	292.023	684.49	4.57098e-10	n/a
HmN_000346100	Multidrug and toxin extrusion protein	-1.22024	444.63	1039.22	3.91833e-10	GO:0006855; GO:0015238; GO:0015297; GO:0016020; GO:0016021; GO:0055085
HmN_000600700	Tetraspanin	-1.22088	450.917	1055.68	1.75241e-13	GO:0016020; GO:0016021
HmN_000259700	Alpha N terminal protein methyltransferase 1A	-1.2221	320.093	748.69	2.14923e-09	GO:0006480; GO:0008168; GO:0016740; GO:0032259
HmN_000749500	Innexin	-1.22489	593.397	1385.96	1.67678e-30	GO:0005921; GO:0006810; GO:0006811; GO:0016020; GO:0016021; GO:0030054
HmN_000796200	Expressed protein	-1.22838	173.9	407.86	1.91444e-12	n/a
HmN_000751700	Timeless	-1.23199	195.663	460.92	1.01595e-09	n/a
HmN_000092800	Monocarboxylate transporter 14	-1.23373	247.863	585.097	1.63835e-21	GO:0016020; GO:0016021; GO:0055085
HmN_000134100	Follistatin	-1.23497	144.073	338.133	3.44799e-09	GO:0005515
HmN_002223500	n/a	-1.23797	381.063	899.057	5.04425e-17	GO:0005515
HmN_000907600	ENTH (VHS) domain containing protein	-1.24159	835.763	1979.14	6.9706e-16	n/a
HmN_000437200	RNA binding protein MEX3B	-1.24274	1631.84	3866.45	1.15873e-13	GO:0003676; GO:0003723
HmN_000593500	Wd40 repeat	-1.24415	165.283	390.313	1.10806e-12	n/a
HmN_000882700	Purine nucleoside phosphorylase	-1.24874	137.22	327.96	3.7531e-13	GO:0003824; GO:0004731; GO:0006139; GO:0009116; GO:0016740; GO:0016757; GO:0016763
HmN_000637800	Protein roadkill	-1.25438	1046.88	2502.89	1.0508e-15	GO:0016020; GO:0016021; GO:0005515
HmN_000607800	DNA primase large subunit	-1.25581	322.563	772.39	2.1706e-14	GO:0003677; GO:0003896; GO:0003899; GO:0006260; GO:0006269; GO:0016740; GO:0016779; GO:0046872; GO:0051536; GO:0051539; GO:1990077
HmN_000549200	Clathrin coat assembly protein ap19	-1.25717	336.937	809.193	3.66159e-15	GO:0006810; GO:0006886; GO:0008565; GO:0015031; GO:0016020; GO:0016192; GO:0030117
HmN_000467700	Chromosome transmission fidelity protein 18	-1.26095	184.893	441.2	1.98163e-10	GO:0000166; GO:0005524
HmN_000688500	Thioredoxin protein 4a	-1.26496	82.1967	198.99	9.92365e-06	GO:0000398; GO:0005681
HmN_000590900	n/a	-1.26901	537.483	1294.46	1.37012e-18	n/a
HmN_000813700	n/a	-1.26985	156.063	376.8	3.22072e-12	n/a
HmN_000341000	WD repeat containing protein 92	-1.27567	217.17	528.25	5.94708e-19	GO:0005515
HmN_000739500	Peroxidasin extracellular matrix-associated peroxidase	-1.27753	5961.16	14453.3	3.54244e-58	GO:0004601; GO:0006979; GO:0016491; GO:0020037; GO:0055114; GO:0005515
HmN_000187000	Rhabdoid tumor deletion region protein 1	-1.27761	90.5267	220.843	1.88055e-08	GO:0005515; GO:0005488
HmN_002176900	n/a	-1.27974	851.97	2070.01	1.03439e-16	GO:0005089; GO:0035023
HmN_002109300	n/a	-1.28036	225.387	550.437	1.19715e-13	GO:0006357; GO:0005634; GO:0070449; GO:0005515
HmN_000037100	n/a	-1.28133	86.75	212.36	3.65284e-10	n/a
HmN_000111100	Pre mRNA splicing factor CWC25	-1.28294	186.64	457.52	9.41183e-10	n/a
HmN_000311300	Polycomb protein SCMH1	-1.28359	491.987	1199.29	2.54397e-26	GO:0005634; GO:0006355
HmN_000637700	Protein tyrosine phosphatase, non receptor type	-1.28499	137.647	337.003	8.1851e-08	GO:0005856
HmN_000433600	80 kDa MCM3 associated protein	-1.2882	553.857	1355.3	6.07136e-18	n/a
HmN_002162900	n/a	-1.29792	124.727	309.307	9.19821e-10	GO:0003676; GO:0005524; GO:0003677; GO:0003887; GO:0006260; GO:0006261
HmN_000444500	Titin	-1.30062	5867.7	14463.6	1.47293e-27	GO:0004672; GO:0005524; GO:0006468; GO:0005515
HmN_000268500	Gag pol polyprotein	-1.30139	373.94	922.6	1.35275e-19	GO:0000226; GO:0000910; GO:0008017
HmN_000281600	Sodium dependent phosphate transport protein 1	-1.30323	274.71	678.433	6.82395e-24	GO:0016020; GO:0016021; GO:0055085
HmN_000846500	Serine/threonine-protein kinase PLK	-1.30367	1117.37	2762.43	3.68012e-20	GO:0000166; GO:0004672; GO:0004674; GO:0005524; GO:0006468; GO:0016301; GO:0016310; GO:0016740; GO:0005515
HmN_000056900	Dienelactone hydrolase	-1.30441	1544.27	3820.57	4.97374e-17	GO:0008152; GO:0016787
HmN_000110300	Histone-lysine N-methyltransferase	-1.30495	460.797	1142.33	1.49363e-10	GO:0005634; GO:0008168; GO:0008270; GO:0016740; GO:0018024; GO:0032259; GO:0034968; GO:0046872; GO:0005515
HmN_000851600	n/a	-1.31205	146.457	363.43	4.50673e-11	GO:0016020; GO:0016021
HmN_000095400	Adenylate kinase 7	-1.31701	153.563	382.803	6.66887e-12	GO:0005524; GO:0006139; GO:0016301; GO:0016310; GO:0019205
HmN_000216400	Kinase D interacting substrate of 220 kDa	-1.31781	276.523	691.757	3.45506e-21	GO:0003676; GO:0003677; GO:0016301; GO:0016310
HmN_000270200	Zinc finger, C6HC type	-1.31914	1354.92	3386.46	1.97544e-42	GO:0004842; GO:0008270; GO:0016020; GO:0016021; GO:0016567; GO:0046872
HmN_000880200	Sodium:hydrogen exchanger domain containing protein	-1.3238	158.403	397.36	5.61374e-15	GO:0006810; GO:0006812; GO:0015299; GO:0016020; GO:0016021; GO:0055085; GO:1902600
HmN_000633500	Enoyl coenzyme A hydratase	-1.32726	432.02	1085.17	8.45311e-40	GO:0003824; GO:0008152
HmN_000250700	Tyrosine-protein kinase	-1.32774	339.307	856.36	6.16359e-20	GO:0000166; GO:0004672; GO:0004713; GO:0004715; GO:0005524; GO:0006468; GO:0016301; GO:0016310; GO:0016740; GO:0018108; GO:0005515
HmN_000948700	Zinc finger protein	-1.32795	100.747	255.367	1.35104e-06	GO:0003676; GO:0046872
HmN_000031300	Organic cation transporter protein	-1.3281	794.737	2000.72	2.07286e-14	GO:0008270; GO:0016020; GO:0016021; GO:0046872; GO:0055085
HmN_000523700	Expressed protein	-1.32991	308.923	781.517	6.34997e-11	n/a
HmN_000395700	Laminin subunit gamma	-1.33207	1958.1	4927.19	5.41744e-38	GO:0005604; GO:0048731; GO:0070831
HmN_000281300	Dynein heavy chain	-1.33397	445.113	1119.99	1.36504e-24	GO:0003341; GO:0003777; GO:0005524; GO:0005858; GO:0007018; GO:0008152; GO:0016887; GO:0030286
HmN_000079700	n/a	-1.33411	123.157	311.583	4.75738e-11	n/a
HmN_002175500	n/a	-1.33455	78.4767	197.497	1.18805e-07	GO:0005515
HmN_000137300	Kinesin-like protein	-1.33698	846.027	2139.9	4.29752e-45	GO:0000166; GO:0003777; GO:0005524; GO:0005871; GO:0005874; GO:0007018; GO:0008017; GO:0008152
HmN_000000700	Sodium bile acid cotransporter	-1.3376	79.9933	204.263	1.28901e-08	GO:0016020; GO:0016021
HmN_000297600	Anaphase promoting complex subunit 1	-1.34322	636.21	1617.23	5.22235e-23	GO:0005680
HmN_000253100	TATA binding protein associated factor 172	-1.34709	973.64	2475.9	2.15123e-36	GO:0005524; GO:0005488
HmN_002038600	n/a	-1.34761	76.1133	192.783	9.44927e-09	n/a
HmN_000788700	n/a	-1.35545	198.41	506.38	1.07198e-10	n/a
HmN_002033600	n/a	-1.35594	131.14	336.693	1.56087e-08	GO:0005515
HmN_000163400	Fructose 2,6 bisphosphatase TIGAR	-1.36076	965.24	2482.88	3.0684e-28	GO:0016020; GO:0016021
HmN_002200500	n/a	-1.36304	122.197	315.91	1.50727e-17	n/a
HmN_000553300	Protein cramped	-1.37577	358.327	933.187	2.25841e-17	GO:0003677
HmN_000516200	Pumilio 2	-1.37698	757.267	1968.9	2.1307e-16	GO:0003723; GO:0005488
HmN_002161200	n/a	-1.37732	602.947	1571.02	6.28612e-18	GO:0006333; GO:0005634; GO:0042393; GO:0006334; GO:0006337; GO:0016573
HmN_000499800	n/a	-1.37858	9239.11	24048.6	7.01405e-29	n/a
HmN_000044600	Insulin degrading enzyme	-1.37948	419.423	1089.48	1.14995e-23	GO:0003824; GO:0004222; GO:0006508; GO:0046872
HmN_000198400	Protein EMSY	-1.38524	401.473	1052.69	2.44464e-16	GO:0006355
HmN_000194500	Integrin alpha ps	-1.3929	1424.79	3741.91	2.56263e-35	GO:0007155; GO:0007229; GO:0008305; GO:0016020; GO:0016021
HmN_000840200	Serine/threonine-protein kinase greatwall	-1.39372	322.29	848.497	2.94465e-14	GO:0004672; GO:0005524; GO:0006468; GO:0016301; GO:0016310; GO:0016740
HmN_000683700	Kinesin-like protein	-1.39427	527.73	1391.16	2.64192e-09	GO:0000166; GO:0003777; GO:0005524; GO:0005871; GO:0005874; GO:0007018; GO:0008017; GO:0008152; GO:0000910; GO:0000915; GO:0072383
HmN_000278800	TBP associated factor 1C	-1.39944	256.84	678.38	8.02455e-15	n/a
HmN_000211300	5' 3' exoribonuclease 1	-1.3995	1076.85	2846.49	3.78647e-16	GO:0003676; GO:0004527; GO:0090305
HmN_000761600	Expressed conserved protein	-1.39992	162.047	431.647	6.38907e-12	n/a
HmN_000053500	Eukaryotic translation initiation factor 2 alpha	-1.40726	695.823	1849.36	4.80946e-26	GO:0000166; GO:0003743; GO:0004672; GO:0005524; GO:0006413; GO:0006468
HmN_000847100	Telomerase binding protein EST1A	-1.40891	591.733	1572.94	1.05605e-37	GO:0005515
HmN_000965000	NCK adaptor protein	-1.40935	828.44	2204.12	7.34991e-18	GO:0005515
HmN_000891300	Condensin complex subunit 2	-1.41164	682.693	1816.69	1.52884e-30	GO:0000796; GO:0007076
HmN_002254400	n/a	-1.41801	51.4767	138.72	4.07194e-06	n/a
HmN_000321800	Flavoprotein oxidoreductase	-1.42071	746.323	2003	1.81579e-42	GO:0008270; GO:0046872
HmN_000076700	Growth factor receptor bound protein	-1.42497	1770.72	4775.45	1.16974e-08	GO:0000166; GO:0003676; GO:0003730; GO:0045182; GO:0006417
HmN_000252700	Zinc finger, RING type	-1.42911	482.133	1302.54	4.25419e-24	GO:0008270; GO:0046872
HmN_000187300	Glutamine synthetase	-1.43395	2564.09	6932.46	7.899e-106	GO:0000166; GO:0003824; GO:0004356; GO:0005524; GO:0006542; GO:0006807; GO:0016874
HmN_000964700	Trans sialidase	-1.4381	3701.19	10049.6	9.91202e-22	GO:0016020; GO:0016021
HmN_000168100	Cell division cycle protein 20	-1.43825	508.407	1379.11	4.87496e-16	GO:0051301; GO:0005515; GO:0010997; GO:0097027; GO:1904668
HmN_000145900	ATPase family AAA domain containing protein 2B	-1.43829	397.987	1079.05	3.29817e-18	GO:0000166; GO:0005524; GO:0005515
HmN_000346300	Ankyrin repeat domain containing protein 11	-1.44468	1238.8	3376.66	4.47695e-19	GO:0005515
HmN_000073400	Transcription initiation factor TFIID subunit	-1.4455	242.323	660.95	8.91319e-23	GO:0003743; GO:0005634; GO:0006367; GO:0006413; GO:0046982
HmN_000414200	Cytosolic malate dehydrogenase	-1.44561	90.7933	248.267	4.28634e-12	GO:0003824; GO:0005975; GO:0006108; GO:0016615; GO:0016616; GO:0055114
HmN_000204400	Trichoplein keratin filament binding protein	-1.44959	234.873	641.747	5.16006e-21	GO:0005882
HmN_000744400	Expressed protein	-1.45068	135.773	372.323	2.32489e-07	n/a
HmN_000087700	Pyridoxal kinase	-1.4512	347.483	947.38	6.7408e-31	GO:0008478; GO:0009443; GO:0016301; GO:0016310
HmN_000931500	Gag pol polyprotein	-1.4519	39.5567	109.437	7.85147e-07	GO:0003676; GO:0015074
HmN_000125400	Ring finger protein unkempt	-1.45673	132.02	363.58	1.24189e-13	n/a
HmN_000511500	Myosin essential light chain	-1.45684	5421.81	14938.5	4.01969e-11	GO:0005509
HmN_000425900	Chloride intracellular channel exc 4	-1.45936	974.81	2690.58	1.73448e-15	n/a
HmN_000050500	Nucleolar complex protein 2	-1.46613	182.273	507.19	2.48718e-07	GO:0005515
HmN_000074800	Expressed protein	-1.46889	340.47	945.713	1.49255e-19	n/a
HmN_000393600	Leucine rich repeat containing protein 6	-1.47008	146.5	407.64	8.07028e-12	n/a
HmN_002108700	n/a	-1.47078	161.943	449.063	9.70584e-12	n/a
HmN_000429000	Leucine rich repeat protein 1	-1.47349	424.027	1179.12	1.44559e-32	GO:0005515
HmN_000122200	KH domain containing protein	-1.48178	1761.6	4931.71	3.1261e-16	GO:0003676; GO:0003723; GO:0034237; GO:0010738; GO:0005739
HmN_000336900	Dynein intermediate chain	-1.48356	150.86	420.55	5.39953e-15	GO:0005515
HmN_000338600	Protein shq1	-1.48379	374.197	1048.78	1.40306e-16	n/a
HmN_000618200	Mitotic and DNA damage checkpoint protein hus1	-1.48669	903.46	2535.64	9.10173e-76	GO:0000077; GO:0006281; GO:0030896
HmN_000248800	Zinc finger, C2H2 type	-1.48708	1340.22	3759.49	3.92476e-47	GO:0003676; GO:0008270; GO:0046872
HmN_000771700	Acid sphingomyelinase phosphodiesterase 3b	-1.48744	533.087	1500.12	1.59635e-17	GO:0008152; GO:0016020; GO:0016021; GO:0016787
HmN_000866700	Calpain 5	-1.49232	532.653	1504.49	6.21716e-46	GO:0004198; GO:0005622; GO:0006508; GO:0051493
HmN_000372600	Ankyrin repeat family A protein 2	-1.49855	219.937	625.343	3.9861e-14	GO:0005515
HmN_000189200	Ubiquitin conjugating enzyme e2 r1	-1.49868	1413.82	4004.99	2.32685e-24	GO:0000166; GO:0005524; GO:0008152; GO:0016874
HmN_000457700	Origin recognition complex subunit 2	-1.51124	148.917	426.813	2.62589e-09	GO:0000808; GO:0005634; GO:0006260
HmN_000727000	E3 ubiquitin protein ligase UBR7	-1.51507	1218.17	3489.96	1.04236e-20	GO:0008152; GO:0008270; GO:0016874
HmN_000339800	Gag pol polyprotein	-1.51521	38.1033	110.153	6.66803e-07	GO:0003676
HmN_000572400	Axis inhibition protein axin	-1.52057	250.65	723.187	7.66716e-19	n/a
HmN_000120000	Leukotriene a4 hydrolase	-1.52789	573.223	1657.58	1.61155e-20	GO:0006508; GO:0008237; GO:0008270; GO:0016787; GO:0019370; GO:0005488
HmN_000511700	KLRAQ motif containing protein 1	-1.53003	159.383	463.52	1.44867e-11	n/a
HmN_000523000	Phosphatidylinositol binding clathrin assembly	-1.53062	1000.7	2894	3.07624e-30	GO:0005543; GO:0005545; GO:0030136; GO:0030276; GO:0048268
HmN_002003100	n/a	-1.53071	249.73	723.65	4.01e-28	GO:0003777; GO:0007018; GO:0030286; GO:0005524
HmN_000773700	n/a	-1.53222	205.457	593.97	3.54121e-18	GO:0005524; GO:0019205; GO:0006139
HmN_000419100	Neurobeachin	-1.53865	449.797	1314.13	1.1103e-12	n/a
HmN_000789200	5' nucleotidase domain containing protein 3	-1.53901	596.987	1742.73	5.00804e-17	n/a
HmN_000592300	Monocarboxylate transporter	-1.5392	401.81	1171.07	2.59699e-37	GO:0016020; GO:0016021; GO:0055085
HmN_000089600	Transmembrane BAX inhibitor motif containing	-1.54305	797.45	2332.05	2.27011e-23	GO:0016020; GO:0016021
HmN_000597600	n/a	-1.54314	171.48	500.54	7.46171e-22	n/a
HmN_000441500	Acidic repeat containing protein	-1.55007	411.257	1207.44	2.15801e-21	n/a
HmN_000347300	DDB1 and CUL4 associated factor 8	-1.55232	825.203	2423.99	3.2168e-46	GO:0005515
[truncated: 1,412 more rows]

## Sheet: S2.4 DE Scolex-Neck cf. End
Additional file 2. Table S2.4. Differentially expressed gene models in the Scolex-Neck cf. End samples, with log2fold changes, normalised counts, adjusted p-values and Gene Ontology hits (n/a = no annotation). GOI highlighted in grey.
[truncated: 2,253 more rows]

[truncated: 4 more sheets: S2.5 DE Mid cf. End, S2.6 UP Scol-Neck cf. Mid & End, S2.7 UP Mid cf. Sco-Neck & End, S2.8 UP End cf. Sco-Neck & Mid]
