# Supplementary material for: Genome-wide transcriptome profiling and spatial expression analyses identify signals and switches of development in tapeworms
Source: EvoDevo. 2018 Nov 9;9:21. doi: 10.1186/s13227-018-0110-5 (PMC6225667; doi:10.1186/s13227-018-0110-5)
Supplement: Supplementary file 3 — Additional file 3. REVIGO [49] summarised Gene Ontology biological process terms associated with differentially expressed gene models. Table S3.1. Larvae cf. Whole Adult. Table S3.2. Scolex-Neck cf. Mid. Table S3.3. Scolex-Neck cf. End. Table S3.4. Mid cf. Scolex-Neck. Table S3.5. Mid cf. End. Table S3.6. End cf. Scolex-Neck. Table S3.7. End cf. Mid. [file 13227_2018_110_MOESM3_ESM.xlsx]

## Sheet: S3.1 GO Larvae cf. Whole Adult
Additional file 3. Table S3.1. REVIGO summarised Gene Ontology biological process terms for gene models differentially expressed in the Larvae cf. Whole Adult
Term ID	Frequency	Description
GO:0007023	0.0002	post-chaperonin tubulin folding pathway
GO:0007034	0.00133	vacuolar transport
GO:0007155	0.00544	cell adhesion
GO:0009308	0.00521	amine metabolic process
GO:0019236	0.00028	response to pheromone
GO:0032780	0.0002	negative regulation of ATPase activity
GO:0048730	6e-05	epidermis morphogenesis
GO:0090382	7e-05	phagosome maturation
GO:0019835	0.00044	cytolysis
GO:0006914	0.0023	autophagy
GO:0000103	0.00084	sulfate assimilation
GO:0018142	1e-05	protein-DNA covalent cross-linking
GO:0006072	0.00121	glycerol-3-phosphate metabolic process
GO:0008283	0.00394	cell proliferation
GO:0006662	0.00122	glycerol ether metabolic process
GO:0007018	0.00287	microtubule-based movement
GO:0033567	0.00019	DNA replication, Okazaki fragment processing
GO:0032469	7e-05	endoplasmic reticulum calcium ion homeostasis
GO:0097428	0.00067	protein maturation by iron-sulfur cluster transfer
GO:0051304	0.00123	chromosome separation
GO:0033566	5e-05	gamma-tubulin complex localization
GO:0034477	5e-05	U6 snRNA 3'-end processing
GO:0022900	0.00564	electron transport chain
GO:0006384	7e-05	transcription initiation from RNA polymerase III promoter
GO:0042127	0.00313	regulation of cell proliferation
GO:0072583	0.00016	clathrin-dependent endocytosis
GO:0030091	0.00068	protein repair
GO:0015671	0.0004	oxygen transport
GO:0006825	0.00081	copper ion transport
GO:0006452	0.00017	translational frameshifting
GO:0006729	0.00032	tetrahydrobiopterin biosynthetic process
GO:0007205	0.00018	protein kinase C-activating G-protein coupled receptor signaling pathway
GO:0090502	0.00502	RNA phosphodiester bond hydrolysis, endonucleolytic
GO:0018293	5e-05	protein-FAD linkage
GO:0071929	3e-05	alpha-tubulin acetylation
GO:0006108	0.00088	malate metabolic process
GO:0042981	0.00313	regulation of apoptotic process
GO:0042742	0.00097	defense response to bacterium
GO:0018343	9e-05	protein farnesylation
GO:0006383	0.00079	transcription from RNA polymerase III promoter
GO:0006730	0.00328	one-carbon metabolic process
GO:0032447	0.00016	protein urmylation
GO:0042273	0.00151	ribosomal large subunit biogenesis
GO:0006368	0.00082	transcription elongation from RNA polymerase II promoter
GO:0043420	0.00024	anthranilate metabolic process
GO:0006955	0.00337	immune response
GO:0006476	0.00072	protein deacetylation
GO:0007528	0.00019	neuromuscular junction development
GO:0019722	0.0004	calcium-mediated signaling
GO:0097359	9e-05	UDP-glucosylation
GO:0045892	0.00592	negative regulation of transcription, DNA-templated
GO:0007229	0.00056	integrin-mediated signaling pathway
GO:0002181	0.00064	cytoplasmic translation
GO:0006032	0.00018	chitin catabolic process
GO:0061025	0.00145	membrane fusion
GO:0002159	2e-05	desmosome assembly
GO:0097010	2e-05	eukaryotic translation initiation factor 4F complex assembly
GO:0050808	0.0007	synapse organization
GO:0000266	0.00022	mitochondrial fission
GO:0009303	0.00022	rRNA transcription
GO:0009186	0.00043	deoxyribonucleoside diphosphate metabolic process
GO:0007268	0.00187	chemical synaptic transmission
GO:0006479	0.00343	protein methylation
GO:0001522	0.0035	pseudouridine synthesis
GO:0006544	0.00221	glycine metabolic process
GO:0036297	0.00018	interstrand cross-link repair
GO:0019069	0.00012	viral capsid assembly
GO:0048749	0.0002	compound eye development
GO:0032006	0.00038	regulation of TOR signaling
GO:0046080	0.00051	dUTP metabolic process
GO:0006166	0.00108	purine ribonucleoside salvage
GO:0051028	0.00075	mRNA transport
GO:0097056	0.00034	selenocysteinyl-tRNA(Sec) biosynthetic process
GO:0006821	0.00117	chloride transport

## Sheet: S3.2 GO Scolex-Neck cf. Mid
Additional file 3. Table S3.2. REVIGO summarised Gene Ontology biological process terms for gene models differentially expressed in the Scolex-Neck cf. Mid
Term ID	Frequency	Description
GO:0006885	0.00066	regulation of pH
GO:0007155	0.00544	cell adhesion
GO:0008152	0.75387	metabolic process
GO:0019079	0.00028	viral genome replication
GO:0032259	0.03103	methylation
GO:0032456	0.00016	endocytic recycling
GO:0033198	9e-05	response to ATP
GO:0040007	0.00317	growth
GO:0048730	6e-05	epidermis morphogenesis
GO:0090382	7e-05	phagosome maturation
GO:0006457	0.00903	protein folding
GO:0042026	0.00069	protein refolding
GO:0000103	0.00084	sulfate assimilation
GO:0009058	0.31611	biosynthetic process
GO:0018142	1e-05	protein-DNA covalent cross-linking
GO:0019673	0.00048	GDP-mannose metabolic process
GO:0007154	0.07219	cell communication
GO:0016311	0.0125	dephosphorylation
GO:0005975	0.0526	carbohydrate metabolic process
GO:0007017	0.00658	microtubule-based process
GO:0006807	0.38744	nitrogen compound metabolic process
GO:0043412	0.09785	macromolecule modification
GO:0071704	0.58357	organic substance metabolic process
GO:0006629	0.03522	lipid metabolic process
GO:0034477	5e-05	U6 snRNA 3'-end processing
GO:0033014	0.00798	tetrapyrrole biosynthetic process
GO:0007018	0.00287	microtubule-based movement
GO:0030163	0.00997	protein catabolic process
GO:0006730	0.00328	one-carbon metabolic process
GO:0051028	0.00075	mRNA transport
GO:0000278	0.00561	mitotic cell cycle
GO:0022900	0.00564	electron transport chain
GO:0051301	0.0123	cell division
GO:0006081	0.00753	cellular aldehyde metabolic process
GO:0090502	0.00502	RNA phosphodiester bond hydrolysis, endonucleolytic
GO:0050790	0.01575	regulation of catalytic activity
GO:0007049	0.01885	cell cycle
GO:0008285	0.00128	negative regulation of cell proliferation
GO:0015074	0.00682	DNA integration
GO:0032447	0.00016	protein urmylation
GO:0016192	0.01085	vesicle-mediated transport
GO:0006108	0.00088	malate metabolic process
GO:0006836	0.00113	neurotransmitter transport
GO:0042981	0.00313	regulation of apoptotic process
GO:0006826	0.00133	iron ion transport
GO:0006913	0.00237	nucleocytoplasmic transport
GO:0006094	0.00262	gluconeogenesis
GO:0090305	0.02271	nucleic acid phosphodiester bond hydrolysis
GO:0018160	0.00029	peptidyl-pyrromethane cofactor linkage
GO:0043420	0.00024	anthranilate metabolic process
GO:0006950	0.04575	response to stress
GO:0055114	0.1506	oxidation-reduction process
GO:0006476	0.00072	protein deacetylation
GO:0035590	0.00013	purinergic nucleotide receptor signaling pathway
GO:0007205	0.00018	protein kinase C-activating G-protein coupled receptor signaling pathway
GO:0042254	0.01422	ribosome biogenesis
GO:0006413	0.00518	translational initiation
GO:0006002	0.0006	fructose 6-phosphate metabolic process
GO:0006396	0.0321	RNA processing
GO:0007267	0.00407	cell-cell signaling
GO:0006139	0.26547	nucleobase-containing compound metabolic process
GO:0031532	0.00028	actin cytoskeleton reorganization
GO:0006508	0.05223	proteolysis
GO:0097056	0.00034	selenocysteinyl-tRNA(Sec) biosynthetic process
GO:0042742	0.00097	defense response to bacterium
GO:0006072	0.00121	glycerol-3-phosphate metabolic process
GO:0016260	0.00034	selenocysteine biosynthetic process
GO:0050808	0.0007	synapse organization
GO:0036265	0.00086	RNA (guanine-N7)-methylation
GO:0006357	0.01273	regulation of transcription from RNA polymerase II promoter
GO:0002159	2e-05	desmosome assembly
GO:0036297	0.00018	interstrand cross-link repair

## Sheet: S3.3 GO Scolex-Neck cf. End
Additional file 3. Table S3.3. REVIGO summarised Gene Ontology biological process terms for gene models differentially expressed in the Scolex-Neck cf. End
Term ID	Frequency	Description
GO:0007155	0.00544	cell adhesion
GO:0008152	0.75387	metabolic process
GO:0016192	0.01085	vesicle-mediated transport
GO:0019079	0.00028	viral genome replication
GO:0019236	0.00028	response to pheromone
GO:0032259	0.03103	methylation
GO:0040007	0.00317	growth
GO:0042254	0.01422	ribosome biogenesis
GO:0048730	6e-05	epidermis morphogenesis
GO:0050790	0.01575	regulation of catalytic activity
GO:0097428	0.00067	protein maturation by iron-sulfur cluster transfer
GO:0006457	0.00903	protein folding
GO:0042026	0.00069	protein refolding
GO:0009058	0.31611	biosynthetic process
GO:0006091	0.0194	generation of precursor metabolites and energy
GO:0007154	0.07219	cell communication
GO:0051304	0.00123	chromosome separation
GO:0000103	0.00084	sulfate assimilation
GO:1990426	6e-05	mitotic recombination-dependent replication fork processing
GO:0006807	0.38744	nitrogen compound metabolic process
GO:0016311	0.0125	dephosphorylation
GO:0006629	0.03522	lipid metabolic process
GO:0005975	0.0526	carbohydrate metabolic process
GO:0071704	0.58357	organic substance metabolic process
GO:0043412	0.09785	macromolecule modification
GO:0033014	0.00798	tetrapyrrole biosynthetic process
GO:0044237	0.53061	cellular metabolic process
GO:0018142	1e-05	protein-DNA covalent cross-linking
GO:0007017	0.00658	microtubule-based process
GO:0007018	0.00287	microtubule-based movement
GO:0006730	0.00328	one-carbon metabolic process
GO:0016042	0.00401	lipid catabolic process
GO:0022900	0.00564	electron transport chain
GO:0051301	0.0123	cell division
GO:0018293	5e-05	protein-FAD linkage
GO:0007049	0.01885	cell cycle
GO:0006879	0.0011	cellular iron ion homeostasis
GO:0006396	0.0321	RNA processing
GO:0051028	0.00075	mRNA transport
GO:0006108	0.00088	malate metabolic process
GO:0032447	0.00016	protein urmylation
GO:0006836	0.00113	neurotransmitter transport
GO:0042981	0.00313	regulation of apoptotic process
GO:0006826	0.00133	iron ion transport
GO:0042779	0.0002	tRNA 3'-trailer cleavage
GO:0006897	0.00235	endocytosis
GO:0006913	0.00237	nucleocytoplasmic transport
GO:0006094	0.00262	gluconeogenesis
GO:0017183	0.00024	peptidyl-diphthamide biosynthetic process from peptidyl-histidine
GO:0043420	0.00024	anthranilate metabolic process
GO:0055114	0.1506	oxidation-reduction process
GO:0006072	0.00121	glycerol-3-phosphate metabolic process
GO:0006950	0.04575	response to stress
GO:0006479	0.00343	protein methylation
GO:0006414	0.00777	translational elongation
GO:0007229	0.00056	integrin-mediated signaling pathway
GO:0007218	0.00059	neuropeptide signaling pathway
GO:0006508	0.05223	proteolysis
GO:0006139	0.26547	nucleobase-containing compound metabolic process
GO:0001522	0.0035	pseudouridine synthesis
GO:0016260	0.00034	selenocysteine biosynthetic process
GO:0009408	0.00166	response to heat
GO:0050808	0.0007	synapse organization
GO:0036297	0.00018	interstrand cross-link repair
GO:0006357	0.01273	regulation of transcription from RNA polymerase II promoter
GO:0002159	2e-05	desmosome assembly

## Sheet: S3.4 GO Mid cf. Scolex-Neck
Additional file 3. Table S3.4. REVIGO summarised Gene Ontology biological process terms for gene models differentially expressed in the Mid cf. Scolex-Neck
Term ID	Frequency	Description
GO:0006914	0.0023	autophagy
GO:0007155	0.00544	cell adhesion
GO:0008152	0.75387	metabolic process
GO:0010212	0.0004	response to ionizing radiation
GO:0016192	0.01085	vesicle-mediated transport
GO:0023052	0.06765	signaling
GO:0032259	0.03103	methylation
GO:0048731	0.01264	system development
GO:1904247	0	positive regulation of polynucleotide adenylyltransferase activity
GO:0048268	0.00018	clathrin coat assembly
GO:0006003	0.00019	fructose 2,6-bisphosphate metabolic process
GO:0019079	0.00028	viral genome replication
GO:0009058	0.31611	biosynthetic process
GO:0006457	0.00903	protein folding
GO:0018095	7e-05	protein polyglutamylation
GO:0005975	0.0526	carbohydrate metabolic process
GO:0006807	0.38744	nitrogen compound metabolic process
GO:0009311	0.00342	oligosaccharide metabolic process
GO:0043631	0.00057	RNA polyadenylation
GO:0007017	0.00658	microtubule-based process
GO:0044237	0.53061	cellular metabolic process
GO:0019370	3e-05	leukotriene biosynthetic process
GO:0006885	0.00066	regulation of pH
GO:0007018	0.00287	microtubule-based movement
GO:0000910	0.00315	cytokinesis
GO:0006629	0.03522	lipid metabolic process
GO:0044249	0.30048	cellular biosynthetic process
GO:0000050	3e-05	urea cycle
GO:0042981	0.00313	regulation of apoptotic process
GO:0030163	0.00997	protein catabolic process
GO:0051301	0.0123	cell division
GO:0006360	0.00051	transcription from RNA polymerase I promoter
GO:0033198	9e-05	response to ATP
GO:0032456	0.00016	endocytic recycling
GO:0009452	0.00112	7-methylguanosine RNA capping
GO:0035590	0.00013	purinergic nucleotide receptor signaling pathway
GO:0007049	0.01885	cell cycle
GO:0090305	0.02271	nucleic acid phosphodiester bond hydrolysis
GO:0006278	0.0011	RNA-dependent DNA biosynthetic process
GO:0006108	0.00088	malate metabolic process
GO:0006836	0.00113	neurotransmitter transport
GO:0006359	0.00033	regulation of transcription from RNA polymerase III promoter
GO:0006913	0.00237	nucleocytoplasmic transport
GO:0006817	0.00242	phosphate ion transport
GO:0006383	0.00079	transcription from RNA polymerase III promoter
GO:0016311	0.0125	dephosphorylation
GO:0090501	0.00748	RNA phosphodiester bond hydrolysis
GO:0006368	0.00082	transcription elongation from RNA polymerase II promoter
GO:0032958	7e-05	inositol phosphate biosynthetic process
GO:0016579	0.00195	protein deubiquitination
GO:0055114	0.1506	oxidation-reduction process
GO:0006997	0.00052	nucleus organization
GO:0006471	0.00019	protein ADP-ribosylation
GO:0006011	0.00052	UDP-glucose metabolic process
GO:0009186	0.00043	deoxyribonucleoside diphosphate metabolic process
GO:0006084	0.00172	acetyl-CoA metabolic process
GO:0006413	0.00518	translational initiation
GO:0006352	0.00766	DNA-templated transcription, initiation
GO:0006139	0.26547	nucleobase-containing compound metabolic process
GO:0006950	0.04575	response to stress
GO:0015031	0.02251	protein transport
GO:0006564	0.00075	L-serine biosynthetic process
GO:0007218	0.00059	neuropeptide signaling pathway
GO:0036297	0.00018	interstrand cross-link repair
GO:0031929	0.00065	TOR signaling
GO:0006099	0.00469	tricarboxylic acid cycle
GO:2000574	7e-05	regulation of microtubule motor activity
GO:0030522	0.00075	intracellular receptor signaling pathway
GO:0006508	0.05223	proteolysis
GO:0006396	0.0321	RNA processing
GO:0070831	4e-05	basement membrane assembly
GO:0006479	0.00343	protein methylation

## Sheet: S3.5 GO Mid cf. End
Additional file 3. Table S3.5. REVIGO summarised Gene Ontology biological process terms for gene models differentially expressed in the Mid cf. End
Term_ID	Frequency	Description
GO:0006898	0.00095	receptor-mediated endocytosis
GO:0006950	0.04575	response to stress
GO:0007275	0.01559	multicellular organism development
GO:0008152	0.75387	metabolic process
GO:0019079	0.00028	viral genome replication
GO:0023052	0.06765	signaling
GO:0032259	0.03103	methylation
GO:0043547	0.0047	positive regulation of GTPase activity
GO:0034551	0.00021	mitochondrial respiratory chain complex III assembly
GO:0006457	0.00903	protein folding
GO:0009058	0.31611	biosynthetic process
GO:0006091	0.0194	generation of precursor metabolites and energy
GO:1990426	6e-05	mitotic recombination-dependent replication fork processing
GO:0005975	0.0526	carbohydrate metabolic process
GO:0016311	0.0125	dephosphorylation
GO:0044237	0.53061	cellular metabolic process
GO:0006751	0.00074	glutathione catabolic process
GO:0016579	0.00195	protein deubiquitination
GO:0007017	0.00658	microtubule-based process
GO:0006629	0.03522	lipid metabolic process
GO:0006108	0.00088	malate metabolic process
GO:0006383	0.00079	transcription from RNA polymerase III promoter
GO:0007018	0.00287	microtubule-based movement
GO:0022900	0.00564	electron transport chain
GO:0051301	0.0123	cell division
GO:0006879	0.0011	cellular iron ion homeostasis
GO:0009452	0.00112	7-methylguanosine RNA capping
GO:0007049	0.01885	cell cycle
GO:0042981	0.00313	regulation of apoptotic process
GO:0090305	0.02271	nucleic acid phosphodiester bond hydrolysis
GO:0006730	0.00328	one-carbon metabolic process
GO:0046907	0.01564	intracellular transport
GO:0006359	0.00033	regulation of transcription from RNA polymerase III promoter
GO:0042761	9e-05	very long-chain fatty acid biosynthetic process
GO:0090501	0.00748	RNA phosphodiester bond hydrolysis
GO:0010738	6e-05	regulation of protein kinase A signaling
GO:0006508	0.05223	proteolysis
GO:0055114	0.1506	oxidation-reduction process
GO:0035307	0.00011	positive regulation of protein dephosphorylation
GO:0006471	0.00019	protein ADP-ribosylation
GO:0007084	1e-05	mitotic nuclear envelope reassembly
GO:0006139	0.26547	nucleobase-containing compound metabolic process
GO:0006366	0.0143	transcription from RNA polymerase II promoter
GO:0015031	0.02251	protein transport
GO:0006367	0.00109	transcription initiation from RNA polymerase II promoter
GO:0006564	0.00075	L-serine biosynthetic process
GO:0043988	2e-05	histone H3-S28 phosphorylation
GO:0006310	0.01641	DNA recombination
GO:0006812	0.03242	cation transport
GO:0006183	0.00053	GTP biosynthetic process
GO:0006479	0.00343	protein methylation

## Sheet: S3.6 GO End cf. Scolex-Neck
Additional file 3. Table S3.6. REVIGO summarised Gene Ontology biological process terms for gene models differentially expressed in the End cf. Scolex-Neck
Term_ID	Frequency	Description
GO:0006457	0.00903	protein folding
GO:0006885	0.00066	regulation of pH
GO:0007155	0.00544	cell adhesion
GO:0007605	0.00039	sensory perception of sound
GO:0008152	0.75387	metabolic process
GO:0023052	0.06765	signaling
GO:0032259	0.03103	methylation
GO:0032509	0.00022	endosome transport via multivesicular body sorting pathway
GO:0033198	9e-05	response to ATP
GO:0036065	0.00035	fucosylation
GO:0009308	0.00521	amine metabolic process
GO:0048268	0.00018	clathrin coat assembly
GO:0009058	0.31611	biosynthetic process
GO:0018095	7e-05	protein polyglutamylation
GO:0016311	0.0125	dephosphorylation
GO:0007154	0.07219	cell communication
GO:1901137	0.03651	carbohydrate derivative biosynthetic process
GO:0030010	0.00052	establishment of cell polarity
GO:0006807	0.38744	nitrogen compound metabolic process
GO:1901135	0.06319	carbohydrate derivative metabolic process
GO:0005975	0.0526	carbohydrate metabolic process
GO:0043631	0.00057	RNA polyadenylation
GO:0006662	0.00122	glycerol ether metabolic process
GO:0051014	0.00011	actin filament severing
GO:0019538	0.18489	protein metabolic process
GO:0000910	0.00315	cytokinesis
GO:0033227	5e-05	dsRNA transport
GO:0006629	0.03522	lipid metabolic process
GO:0007018	0.00287	microtubule-based movement
GO:0007017	0.00658	microtubule-based process
GO:0000050	3e-05	urea cycle
GO:0007034	0.00133	vacuolar transport
GO:0019370	3e-05	leukotriene biosynthetic process
GO:0015074	0.00682	DNA integration
GO:0051301	0.0123	cell division
GO:0043547	0.0047	positive regulation of GTPase activity
GO:0006891	0.00064	intra-Golgi vesicle-mediated transport
GO:0035725	0.0012	sodium ion transmembrane transport
GO:0031123	0.00145	RNA 3'-end processing
GO:0007049	0.01885	cell cycle
GO:0006368	0.00082	transcription elongation from RNA polymerase II promoter
GO:0042127	0.00313	regulation of cell proliferation
GO:0042981	0.00313	regulation of apoptotic process
GO:0009408	0.00166	response to heat
GO:0046782	9e-05	regulation of viral transcription
GO:0007205	0.00018	protein kinase C-activating G-protein coupled receptor signaling pathway
GO:0016192	0.01085	vesicle-mediated transport
GO:0032958	7e-05	inositol phosphate biosynthetic process
GO:0006913	0.00237	nucleocytoplasmic transport
GO:0090305	0.02271	nucleic acid phosphodiester bond hydrolysis
GO:0035590	0.00013	purinergic nucleotide receptor signaling pathway
GO:0055114	0.1506	oxidation-reduction process
GO:0006955	0.00337	immune response
GO:0006479	0.00343	protein methylation
GO:0030522	0.00075	intracellular receptor signaling pathway
GO:0006836	0.00113	neurotransmitter transport
GO:0006413	0.00518	translational initiation
GO:0006482	0.00019	protein demethylation
GO:0006396	0.0321	RNA processing
GO:0006508	0.05223	proteolysis
GO:0046835	0.0023	carbohydrate phosphorylation
GO:0006564	0.00075	L-serine biosynthetic process
GO:0048015	0.00061	phosphatidylinositol-mediated signaling
GO:0006139	0.26547	nucleobase-containing compound metabolic process
GO:0007010	0.00786	cytoskeleton organization
GO:0007528	0.00019	neuromuscular junction development
GO:0006352	0.00766	DNA-templated transcription, initiation
GO:0032008	0.00016	positive regulation of TOR signaling
GO:0009190	0.00182	cyclic nucleotide biosynthetic process
GO:0016579	0.00195	protein deubiquitination
GO:0019432	0.00021	triglyceride biosynthetic process

## Sheet: S3.7 GO End cf. Mid
Additional file 3. Table S3.7. REVIGO summarised Gene Ontology biological process terms for gene models differentially expressed in the End cf. Mid
Term_ID	Frequency	Description
GO:0006457	0.00903	protein folding
GO:0006885	0.00066	regulation of pH
GO:0007155	0.00544	cell adhesion
GO:0007605	0.00039	sensory perception of sound
GO:0008152	0.75387	metabolic process
GO:0009308	0.00521	amine metabolic process
GO:0023052	0.06765	signaling
GO:0032509	0.00022	endosome transport via multivesicular body sorting pathway
GO:0033198	9e-05	response to ATP
GO:0006807	0.38744	nitrogen compound metabolic process
GO:0001709	0.00015	cell fate determination
GO:0051260	0.00106	protein homooligomerization
GO:0016311	0.0125	dephosphorylation
GO:1901137	0.03651	carbohydrate derivative biosynthetic process
GO:0006662	0.00122	glycerol ether metabolic process
GO:0009058	0.31611	biosynthetic process
GO:1901135	0.06319	carbohydrate derivative metabolic process
GO:0005975	0.0526	carbohydrate metabolic process
GO:0006388	0.0004	tRNA splicing, via endonucleolytic cleavage and ligation
GO:0016579	0.00195	protein deubiquitination
GO:0051013	8e-05	microtubule severing
GO:0051014	0.00011	actin filament severing
GO:0030010	0.00052	establishment of cell polarity
GO:0043412	0.09785	macromolecule modification
GO:0006915	0.00406	apoptotic process
GO:0033227	5e-05	dsRNA transport
GO:0006629	0.03522	lipid metabolic process
GO:0000910	0.00315	cytokinesis
GO:0007017	0.00658	microtubule-based process
GO:0015074	0.00682	DNA integration
GO:0007034	0.00133	vacuolar transport
GO:0051301	0.0123	cell division
GO:0006891	0.00064	intra-Golgi vesicle-mediated transport
GO:0006368	0.00082	transcription elongation from RNA polymerase II promoter
GO:0035725	0.0012	sodium ion transmembrane transport
GO:0008203	0.00028	cholesterol metabolic process
GO:0050790	0.01575	regulation of catalytic activity
GO:0007049	0.01885	cell cycle
GO:0006749	0.00151	glutathione metabolic process
GO:0006955	0.00337	immune response
GO:0042127	0.00313	regulation of cell proliferation
GO:0016192	0.01085	vesicle-mediated transport
GO:0007205	0.00018	protein kinase C-activating G-protein coupled receptor signaling pathway
GO:0006913	0.00237	nucleocytoplasmic transport
GO:0019318	0.00641	hexose metabolic process
GO:0090305	0.02271	nucleic acid phosphodiester bond hydrolysis
GO:0090501	0.00748	RNA phosphodiester bond hydrolysis
GO:0035590	0.00013	purinergic nucleotide receptor signaling pathway
GO:0006508	0.05223	proteolysis
GO:0055114	0.1506	oxidation-reduction process
GO:0006099	0.00469	tricarboxylic acid cycle
GO:0048015	0.00061	phosphatidylinositol-mediated signaling
GO:0006836	0.00113	neurotransmitter transport
GO:0009190	0.00182	cyclic nucleotide biosynthetic process
GO:0050808	0.0007	synapse organization
GO:0019370	3e-05	leukotriene biosynthetic process
GO:0006542	0.00081	glutamine biosynthetic process
GO:0016266	6e-05	O-glycan processing
GO:0019432	0.00021	triglyceride biosynthetic process
