# Supplementary material for: Genome-wide transcriptome profiling and spatial expression analyses identify signals and switches of development in tapeworms
Source: EvoDevo. 2018 Nov 9;9:21. doi: 10.1186/s13227-018-0110-5 (PMC6225667; doi:10.1186/s13227-018-0110-5)
Supplement: Supplementary file 4 — Additional file 4: Table S4. Zinc finger transcription factor genes of interest. [file 13227_2018_110_MOESM4_ESM.xlsx]

## Sheet: ZF Table
Additional file 4. Table S4. Putative zinc finger transcription factorsa
Contrast						Log2fold change (transformed mean expression Sample A - Sample B)
	Gene model	Description (WormBase Parasite)	Larvae cf. Whole Adult	Scolex-Neck cf. Mid	Scolex-Neck cf. End	Mid cf. Scolex-Neck	Mid cf. End	End cf. Scolex-Neck	End cf. Mid
Larvae cf. Whole Adult
	HmN_000279600	Phd finger protein 10	4.8 (2915 - 101)	-	-	-	-	-	-
	HmN_000585600	Zinc finger BED domain	2.2 (1010 - 217)	-	-	-	-	-	-
	HmN_000119400	Gata zinc finger domain containing 2b	1.6 (6947 - 2266)	-	-	-	-	-	-
	HmN_000633700	Zinc finger, C2H2 type	1.5 (2805 - 1002)	-	-	-	-	-	-
	HmN_000277300	Zinc finger CCHC type and RNA binding	1.4 (367 - 143)	-	-	-	-	-	-
	HmN_000955300	Zinc finger protein	1.3 (264 - 108)	-	-	-	-	-	-
	HmN_000696000	Zinc finger protein	1.2 (3140 - 1369)	-	-	-	-	-	-
	HmN_000393200	Zinc finger (C2H2) and AT rich domain	0.8 (1510 - 868)	-	-	-	-	-	-
	HmN_000123600	Zinc finger, C2H2 type	0.8 (821 - 474)	-	-	-	-	-	-
	HmN_000786700	Zinc finger, C2H2 type	0.8 (776 - 447)	-	-	-	-	-	-
	HmN_000028200	Bromodomain adjacent to zinc finger	0.8 (2734 - 1599)	-	-	-	-	-	-
	HmN_000643500	Zinc finger protein	0.7 (3175 - 1897)	-	-	-	-	-	-
	HmN_000169300	Zinc finger and btb domain	0.7 (1379 - 829)	-	-	-	-	-	-
	HmN_000828500	Zinc finger protein	0.7 (808 - 498)	-	-	-	-	-	-
	HmN_000826500	Zinc finger, PHD finger	0.6 (946 - 629)	-	-	-	-	-	-
	HmN_000301300	Zinc finger protein 235	0.6 (2187 - 1479)	-	-	-	-	-	-
	HmN_000066200	Zinc finger protein 57	0.5 (1206 - 828)	-	-	-	-	-	-
	HmN_000482500	Zinc finger MYND domain 11	0.4 (1711 - 1274)	-	-	-	-	-	-
(Larvae cf. Whole Adult) AND (Mid cf. Scolex-Neck and End)
	HmN_000139200	Zinc finger protein 40	0.9 (229 - 121)	-	-	1.6 (134 - 42)	1.9 (116 - 30)	-	-
(Larvae cf. Whole Adult) AND (Scolex-Neck cf. Mid and/or End)
	HmN_000433700	Zinc finger protein 84	2.9 (4947 - 641)	1.9 (1309 - 340)	1.4 (1078 - 393)	-	-	-	-
	HmN_000429600	Zinc finger, FLYWCH type	2.8 (1749 - 249)	1.0 (377 - 181)	1.9 (311 - 77)	-	-	-	-
	HmN_000631300	Zinc finger, C2H2 type	2.6 (833 - 135)	2.1 (309 - 71)	1.9 (254 - 67)	-	-	-	-
	HmN_000054200	Protein odd skipped	2.6 (484 - 79)	1.8 (169 - 49)	-	-	-	-	-
	HmN_000108600	Zinc finger protein	2.6 (1539 - 248)	1.1 (426 - 204)	1.4 (351 - 126)	-	-	-	-
	HmN_000108500	Zinc finger protein	2.2 (1032 - 221)	1.5 (558 - 196)	2.3 (459 - 91)	-	-	-	-
	HmN_000184000	Zinc finger protein	2.0 (207 - 50)	1.5 (91 - 31)	-	-	-	-	-
	HmN_000668400	Zinc finger protein	2.0 (318 - 80)	1.2 (144 - 64)	-	-	-	-	-
	HmN_000108400	Zinc finger protein	1.4 (1719.6 - 670.3)	1.1 (1132 - 528)	1.9 (932 - 241)	-	-	-	-
	HmN_000529900	Myeloid zinc finger 1	1.3 (1642 - 652)	-	1.6 (577 - 181)	-	-	-	-
	HmN_000146300	Zinc finger protein 577	1.3 (991 - 406)	0.9 (582 - 309)	1.0 (479 - 234)	-	-	-	-
	HmN_000840400	Zinc finger transcription factor gli2	1.2 (3060 - 1356)	1.0 (1748 - 871)	1.1 (1440 - 649)	-	-	-	-
	HmN_000072000	Zinc finger protein basonuclin 1	1.0 (387 - 189)	1.8 (410 - 121)	1.7 (338 - 101)	-	-	-	-
	HmN_000560800	Zinc finger, C2H2 type	0.8 (1599 - 924)	-	1.6 (984 - 306)	-	1.4 (950 - 336)	-	-
Scolex-Neck cf. Mid and/or End
	HmN_000108700	Zinc finger protein	-	3.1 (93 - 11)	3.2 (77 - 7)	-	-	-	-
	HmN_000007800	Zinc finger, C2H2 type	-	1.3 (2016 - 824)	-	-	-	-	1.0 (1453 - 714)
	HmN_000455300	Zinc-finger homeobox	-	1.2 (590 - 261)	-	-	-	-	1.7 (774 - 227)
	HmN_000143300	Zinc finger, C2H2 type	-	1.0 (1393 - 679)	0.7 (1148 - 688)	-	-	-	-
	HmN_000148300	Zinc finger protein 45	-	0.7 (974 - 578)	-	-	-	0.6 (1229 - 803)	1.4 (1344 - 501)
	HmN_000385800	Zinc finger, C2H2 type	-	0.7 (1659 - 991)	-	-	-	-	0.7 (1377 - 858)
	HmN_000042900	Zinc finger, LIM type	-	0.7 (5087 - 3085)	-	-	-	-	-
	HmN_000727500	Zinc finger protein 226	-	-	1.6 (276 - 92)	-	1.5 (294 - 101)	-	-
	HmN_000087300	Zinc finger protein	-	-	1.5 (191 - 67)	-	-	-	-
	HmN_000610600	Zinc finger protein	-	-	1.3 (264 - 108)	-	-	-	-
	HmN_000820000	Krueppel factor 5	-	-	1.2 (240 - 105)	-	-	-	-
	HmN_000879500	Zinc finger protein	-	-	0.9 (813 - 446)	-	-	-	-
Mid cf. Scolex-Neck
	HmN_000926800	Zinc finger protein	-	-	-	7.9 (512 - 2)	-	5.5 (161 - 2)	-
	HmN_000864300	Zinc finger protein-like-related	-	-	-	7.7 (80 - 0)	-	5.1 (70 - 0)	-
	HmN_000740000	Zinc finger protein Ssu Zic	-	-	-	7.6 (206 - 0.6)	2.5 (179 - 29)	-	-
	HmN_000864000	Zinc finger protein 84	-	-	-	7.4 (697 - 3)	-	-	-
	HmN_000395000	RB associated KRAB zinc finger	-	-	-	7.1 (804 - 5)	2.9 (696 - 61)	-	-
	HmN_000888800	Zinc finger protein	-	-	-	7.1 (150 - 0.9)	-	-	-
	HmN_000517900	Zinc finger protein	-	-	-	6.7 (38 - 0)	-	4.2 (31 - 0)	-
	HmN_001032400	Zinc finger protein	-	-	-	6.5 (159 - 2)	-	4.1 (54 - 1)	-
	HmN_000872800	Zinc finger protein	-	-	-	5.6 (745 - 15)	-	-	-
	HmN_000330600	Zinc finger protein	-	-	-	5.0 (227 - 7)	-	-	-
	HmN_000880000	Zinc finger, C2H2 type	-	-	-	3.8 (69 - 5)	-	-	-
	HmN_000491500	Zinc finger protein 333	-	-	-	3.6 (282 - 22)	3.6 (245 - 13)	-	-
	HmN_000689600	Zinc finger, C2CH type	-	-	-	2.9 (63 - 8)	-	-	-
	HmN_000841900	Zinc finger, C2H2 type	-	-	-	2.9 (704 - 97)	2.8 (608 - 60)	-	-
	HmN_000355200	Zinc finger protein 91	-	-	-	2.4 (1133 - 214)	-	-	-
	HmN_000621400	Zinc finger homeobox protein	-	-	-	1.9 (795 - 216)	-	-	-
	HmN_000248800	Zinc finger, C2H2 type	-	-	-	1.5 (3760 - 1340)	1.0 (3259 - 1572)	-	-
	HmN_000948700	Zinc finger protein	-	-	-	1.3 (255 - 101)	-	-	-
	HmN_000136000	Zinc finger protein	-	-	-	1.1 (543 - 253)	-	-	-
	HmN_000489000	Zinc finger protein 668	-	-	-	1.1 (328 - 154)	-	-	-
	HmN_000033300	Zinc finger protein YGR067C	-	-	-	1.0 (736 -362)	-	-	-
	HmN_000228000	Ankyrin repeat and zinc finger domain	-	-	-	0.9 (1136 - 607)	-	0.6 (753 - 500)	-
	HmN_000456800	Zinc finger protein 782	-	-	-	0.8 (1169 - 683)	-	-	-
	HmN_000905900	Zinc finger, C2H2 type	-	-	-	0.7 (1756 - 1112)	-	-	-
	HmN_000926700	Zinc finger protein	-	-	-	0.6 (2352 - 1558)	-	-	-
	HmN_000127200	Zinc finger, C2H2	-	-	-	0.5 (1260 - 864)	-	-	-
End cf. Scolex-Neck and/or Mid
	HmN_000359600	Zinc finger A20 and AN1 domain	-	-	-	-	-	0.9 (7885 - 4336)	-
	HmN_000186900	Zinc finger A20 and AN1 domain	-	-	-	-	-	0.7 (2215 - 1390)	0.9 (2420 - 1266)
	HmN_000734300	Growth factor independence	-	-	-	-	-	-	2.7 (76 - 10)
	HmN_000160600	Zinc finger protein	-	-	-	-	-	-	1.1 (940 - 448)
	HmN_000574300	Krueppel factor 10	-	-	-	-	-	-	0.9 (5492 - 2828)
aSpatial expression patterns are discussed in the text for the gene models shown in bold.
