# Supplementary material for: Genome-wide transcriptome profiling and spatial expression analyses identify signals and switches of development in tapeworms
Source: EvoDevo. 2018 Nov 9;9:21. doi: 10.1186/s13227-018-0110-5 (PMC6225667; doi:10.1186/s13227-018-0110-5)
Supplement: Supplementary file 6 — Additional file 6: Table S5. Gene-specific primers and predicted protein sequences of transcripts examined by WMISH. [file 13227_2018_110_MOESM6_ESM.xlsx]

## Sheet: Sheet1
Additional file 6. Table S5. Gene specific primers and predicted protein sequences of transcripts examined by WMISH
	Gene	Gene model	Forward primer	Reverse primer	Protein sequence
	aris-like	HmN_000064700	ATGTCGGATAGTTATACAAGTGCA	ATTCAGCGATGATAGTGATAGTTCA	MSDSYTSATSIVATATVASSETSSLSVANGLETFDFQKSRNHLSNPRLPYSLALGNQPKPSYSNITVSSQGDSSISMNVCSNSNEDKQKKRRNRTTFTSFQLNEMERIFQKTHYPDVYAREQLALRTGLTEARVQVWFQNRRAKWRKRERLCNGNNTSGVGTISPMPSVFYYGEFTDNSNVFPEGFRKGFEHPEVPFPSDLIGRRSEYSQFLCNPMRSTGQYHKAFLPRYVKPPNTQVPFNEATRIFNSLMPKLYNPSVEAPHSQISHHQSPSSLPPSSHIPSSVSLSQQQNLHHPHIHNASQSPFNLPVSLKASEGISKFMKEWPESDDARWALHDDQWIKQKYQQPGISTSNQSPIYNHPNFDAYSKHYGEYGCPELSLSSLNK
	boule	HmN_000762300	ATGACTACTGTAAATGCTCAGGCG	CCTCCGTTTTGTTTACCAGTATGG	MTTVNAQAAEFAARYVDPEGVPISANQALLGSGSPSAPKIGTLIPNRIFVGGIPSNTTEQELKAYFSSFGQVKDVKIINDRLGVAKGSYGFVTFECQEVAEKIIKNESETLIFKDRKLNIGHAIRKQQLFPRPADVAPTLFFPGGAAIPCGFQSGLPVFPLTGQDYSVLAQQGSAYQQMLLQQANGAAMYLSPQSANQQAAAAAAAAVQYSALQSQLAAAQQNAAAYATLQQQQQQHQQYPQAASLTGQLTTTGSQSQAAMLAAAMAAASQWPNAASTPVNGHNTSGSVPPSLTPAPVGQHTAPTTVDATQSPNVAALAAAAAAAAWRWFSPAAVTQHNGSGTLLASSPTAACGQSASQQQIHSGEHQQQLVFLPNTTTTSDYSTDHSAHSSGLLESVE…
	bZIP137200	HmN_000137200	TCTCCACGCAGTAGTCCACACAGT	GTTGGCGGAAGAGTTATTCGGCGT	MGELTGPSSTDSPRSSPHSSPHSLSSIIPQVSSAFLYNSMISATHANGDLPQSPPPPNLMEDDEMDSCSTTFYRSSTGETRKAREFIPDSKKDEKYWERRRKNNEAAKRSREKRRQNDAMMEHEIAELKQQNEILMRENCALLREIAALKGKDPACVEAATPPIQQLPSSTNGIISTLDLIGLQRLLATFSTNAANGITPVSAAVDNSVVNGSGLDETPLDLSGGKIPMIVKQSCLPSPDSQSVGNVSQIGKLTELAVLTSTSPQITADGSYSTNRPQSVSWNSTPNPITPPACNGLQALISAAALTASPLMSETNCGIVTNAGHAANSCTTKPTWDIHQASPCLPLGFQPLPQQKMEASSDLTPRRRNGSIRSPSSQYDDERYRERRRKNNEAVRRCR…
	extra-like	HmN_000610200	GAATCTTCCTCCCCTCCCATTATC	AGGGCTTATAGTGGTGTTCATTGT	METLQFVDSNSSIPSLFGLNTTNFKMTNADTSSHVQNSDSDSNNRLPTAILPKPPNHSFKHVHVLQCPGCQFSTLISLTLQGHIKANHPTIDSFTAFSCSDCGAKTTEKNLLEDHMKLYHPNAEQPYKFLELRHSVTSIVDGVPLASPRSTVSSTISTATAQTVRLESSSPPIITSPQKSTITSHALAKAECATEVTEKFTNAIQGSKKRKAHTPGKITPAALPVNGDAEDSVVETEYKRIKLDKSPEPNVEIDTKLEGTNTSQSEITSNATSTTMVCTVNGFMEALKNRQQLVNAQQNATAPKITTTSIMMDSNVAKNLVNQLLASAQGKIEVGTSPSSSTNQANLSVDQALDMSMRSTLEQGLQLQAGLKTSELKLSDLIQTNQFNLRGLLGGQSTV…
	foxC-like	HmN_000142300	CTCGTCTGCTAGTGGAATGTTCTA	CTGTATGAACAGCAGTAAGGTTCG	MEAQDSARLLVECSTYSQNMNIPAPVPTTQMTANPFAVSHIPQENERSCWSDINSTLNYNPMACLLSNSANSEDPKLKPSLSYIALIFTAITNSPSRMLTLSGIYKYITDNFKYYEKHKHGWKNSIRHNLSLNDCFVKVDRDSSHPGKGCYWTIHPNAEHMFEDGSYLRRKKRFKLPQSDHKQGKNLRIKANQVRENIMAVSSSSELNAERPTSTQKAPAQFTPAQNAYSYASQSTTYMQPTNSWVQPMNNFQQSYVLPQQNSKLQEYFSGPLMPGNYYSNLPQQSVTSYHSYGVPQQFHNNPAWYSGNYLNQQQATSIPPHNLNRISLDSSGSLLRTSPEMGIPCRISPTVEVKADSANLTAVHTAHSSEYSDPNFTQLL
	foxQ2	HmN_000125600	CGCCTGCCTTTCTTCTGGATGAGC	CAAACGCCCAACAGACTTGCAACA	MDEGSQIVPLNLCSPAFLLDELKSISSTFLQSPPQLQALQVAQQNHIPGDLDLSLYSRAPEGYSLPLGGTPMLLPDYRIQHKTIEEEPKPNFSYIGLIAKAILSSKDRRMVLSEIYEWIQVNYAYFRSRGPGWRNSIRHNLSLNDCFIKVGRSSNGKGHYWGIHPANVEDFRRGDFRRRRAQRKVRRALGLSCPGDGEDSDSPPISPPPPFPSSQSCGFPSLPLRSTANTDRRFLPPSNPSMDMFTALLNSLMTSGILPPNQNTFHPSQHQLPPYLPNTQPLEKERDAEECSRGPLQPRPASNSGSFSVASLLGV
	msxlx	HmN_000016500	GGATTGTATTGTGATGCCCAATCA	TCTCTAAACCAGTCTTTCGGAAGG	MDCIVMPNQSPFSIKNILKSSGGKSVDRGPSPDTNRTSENNNFHVASSFPHINSASQFTIPHSDPDNAILFRNLMEETENQKEEIPGVLRARNRNSRVPFTRNQVERLETIFNQTNYLSGREVTEVARELQISESRVKIWFQNRRARKRREFNLREMTTLPLYPGQPNPSDFLQNVRQAQVDRTQEFSQFLPFLPKDWFRDGSL
	myoD	HmN_000553800	CTCGAGCAGTGAGGTAGCACCCAA	TGGCGGACTTTTCGGAGGTATTCG	MLGGSNSDYSSSEVAPNATAKLHDSESSNSASRSEVVYPYPEYANLMGYETAGVNQNRPFPTDSHPGPLQTLVSQLVAKSELTSNEGNYDHLLYSATTSAAAPGYPPFYGNQPAAGVMPPSFEGFYPQSYTAYMSDHLNSSTDLNGFAYSGGYPTNRGYETSDYAGTEYPSQHPATSSANKPAAATANALDSSSTSSVNSTCSAMEPGFSNNPGFYLKPEEGGKLPGFFSAPNSGVQSAPNTAGTTPTTCNLNSSIDKNQGKRMVDTRRNSGDMRKKVRSLQQTPKKADSVTEKTAKSSLGMSEDRSPISMGDSGDDTCSSDDEHGPGNKEEHVLAPGSHGQCLLWACKACKKKTMQVDRRKAATMRERRRLRKVNEAFETLKRRTCSNPNQRMPKVEI…
	nk1	HmN_000601100	ATGGCTTCTTTCAGAGTGGATCAT	TCACATTGTCGGTAGTAGCTGAAT	MASFRVDHILNNQEEDSNPDDDEPGIKDLTAASRFQTTQVVDDRKSESSAPSENTSVSSNCFGRVDFSALLQQHQSQPSCLNLSSLLALQESEYFQLARTDPSFFTNAALQNHQKQQHHYQTQKQQIMRAAENGDQLQGVSSGVGAGKHRRARTAFTYGQLVALESKFKTTRYLSVCERMNMALSLNLTETQVKIWFQNRRTKWKKENPTEQHHQSSTSSLNTRKQINSPDQPLLYGGLGSNQSDVSEMSPPSSSIPESPPARDHQREDGTNAVLLAYVFNQLRNSLHKEEKSTNGEEILQSFSNNNSSNSATTDNVSTNGRSSKGEAEQLGLRTGS
	otp	HmN_000845400	CCCCAGTCACAATACCAACGGCAC	GCAACCTTGCATGGTGACCTCT	MPTKGCKEGDNKRRKQWMLLAVGDEVLDIGYIQLGRSIAIQHREFGEQLSQSSSGGGNLDRQSKTDVTGTEETSGSADSKVVTAERGRMSSPTSDSINSRQESYLNSADPSHNTNGTNNQSMKTSNEEGEKCVDDIKQPQQSTDAKIGRIYTDILKRTIGIGGNQTAFPKLEATTNSSGGYNEFEADNLGTDDGEDEESFSQSQFSKNPQNNNGNGSGFDSYHILVGYDSQNGGNANSSTAAINNVAMAAVAAAASAKQKRHRTRFTPGQLNELERVFAKTHYPDIFMREELALRIGLTESRVQVWFQNRRAKWKKRKKTGSNNCIGTTGGSCGGNSGINSAFKTPSLAMNSLPRGLESAQSIFGKVACNQPSTPPSLSLLHAACSRAAVQLSPDLGVY…
	otx	HmN_000666600	CCATGTGCAAATCAGCTTCAAAGGC	TTTCTCGGTTGCGTTCTTTGGCCC	METDDRVDDINQRPSNPNETNPYGPNYYPCANQLQRLLDYTTDYHQGSTGSIQGENSSASGILSSATRLNSTSPYYSIQGGEVSNQFSRADLSPPFFTSGSTNYLNQNTLTQINPYRPNGAFSSPFYDSMQNLTFMTNHRSPLSQPYTETSKATYQPTTDDLLPNAINTWSPTPQNPASFSSPRPSHNANGSGGDILWNAFHGTGGYTSYSNYANSPQNFNSASNNLQSKVLQYHNRCQRRQQNCPYPQMLDLIQHQWRRQPVQGEIGQSVKHQSAIANSAANRVQGSTRRERTIYSSEQQEVLEKFFSINQYPDISAREELAEKVELPESRIQVWFKNRRAKERNREKQKQRMHCTDNMTE
	pax-like	HmN_000199100	TGGATCACGGTCAAAGTAAGCTAA	GAATCTGCATCACCATTCTTCTGG	MDHGQSKLTEYSISSLIGNDNRQSPSIPNTPLTSPFYNAFWGCHFLAGLAQKYLNELQNNSNPSCPQNQFIQSSFLPPPISSAFPPLGSSNNAAWYLQTLLANASKLADLPHPSLLDSGILNPAAYRKIMSQVLNLQPLQSQPPPPPQRQSSPQNLSARSKNVDINNLPTTGSTPKQSPSQANSSEQGSSIVFEGQGRINQLGGMFINGRPLPYKTRLRIVQMSRNGVRPCDISRQLKVSHGCVSKILQRYHETGSVSPGATGGARKNRIHGQTRSHLNVSINPSHSYPHHHQYVFPSSSTKELPQNLSRKPQMGKMPFEFPNWNESWSSFGSSTTLPTFPRHDLNSAYSQQRETQHPRLKFSASMLVDQKNGDADSKSDKPDPNP
	pou4	HmN_000747700	ACCGCTACAAGTTCCAAGAGCTGA	ACCTGATGTAGCAGTCCCACTGTCG	MATEGPLQVPRADSFPKNPVPTQQQSMYPSQRESYSETSASDQSSQNQQQQAGNLMRGYSFLADQIYRSVSNPLYKLVQTVEDTVGSENSNKQVEEVFRHGYQGYQTATNLKFESNGTFEGENVAKLPEQQDLNAHQIHRQQNFNNWEANTVRSVQQWYPRSANDVPQPTNEAYSNDANWPTAHGSQSEASKSETPPPQSNSPSKTAVAFQQQQVQQNRYHQQYFQEWAETNPSTNTNPVANPTGFYPPQQFDAPVAPTGNSSSPQISEEVTFSQAVNNSAPDASSCPGCCIPSAATSHQNTVYPESGGGDLHNGLCLVDPMRALPRYLTSGLWPPVINQLEWNGSAVMGEDDARLLEMNRFYGDGSYRMPGSAIAANVYQGYSGVQDTKDFFFAPSRY…
	pou-like	HmN_000074300	TACCAGCACTGCTTCTATTCTTCCT	TCCATTTCAATCTTTGATTCCGTCG	MLFLYQHCFYSSSNGTFDSTSQEDLKDDQMACSSNLYWPQFTSPDYCNYPYPGLQPQWIGEDKYAVPTQPQWENNLEIVPLCNTAAPSFPQTSEHPPPPPPDNDLEIFADHFKQRRMKMGITQADVGKALGEMMIPGVESLSQSTICRFESLTLSRSNMIALRPLLQIWLDRTEALGAANSNPQAHDSGFFSPNSLSRGNANRRKRTCITDSEKRALEAYFAVQHQPSSDRISQIATLLSLPKSVVRVWFCNQRQKQKRLKWGYESGARIKDTTESKIEMEYFSQ
	prox3	HmN_000961900	TAATACAAACTCTGCATCACCGGA	CTTGTAGATGGGTTTCTTCCAGGA	MFGSHFDCFNSSQLWLMQFAESSEFSTRSNTNSASPEKCNSDEGDDQRGSSQSTTPNSSLEANGATDIPSLSTFKEASIKLSEGTSRSSYAMDDILRINSQSSSTQGGVNGAISETRKVESGSTADEIMKLICSLGKHSETEKEIMRIEISKLLNNTENLKENSDIKEIPTGESNKTSNEEKWNRCVQQTNPVISPSPFFLPMPRDMFGLFCHPRGLVDSVESLLLKPLPNNYPHLNNANEKFKQPPLTFLPPNLGIPVETTTNNQTEALSLVVDKDNNNHSSLLESNQGFENPMLSPRKKRTKVTDTRLPPQKMPSSNGIPLPTLEDSSPPKSIFGCPFNPSQKTLNLPSNVVDRPNFFHRTLPTSNHFLSLFQPNPFLGGNSQFHLPHAICRETSPI…
	six3/6	HmN_000022100	CCACTTCCCAAACAAAGCCCCCAG	GGAGGTCGTTGTTCCCGCTTCTTG	MSNEGNEKYFPFSAQSFLDSTSQTKPPDDISSQKDIFAAFIAARAFKWPPENDVLSKPQEVIRICQNLESCGNIERLRQFMWLLHKRGDLWELLNRDESILRCRALVAFHTRNFSELYSLLERHNFSKASHAKMQALWLEAHYQEAESLRGRALGPVDKYRVRKKHPLPKTIWDGEQKTHCFKERTRSLLREWYLQDPYPGPNKKRELANATGLTPTQVGNWFKNRRQRDRAAASKNQRILINDGSEDEIQVDSKLLASSSSPFINHSDQPSPTYLDDGEGVPKCSSSSKPSPFSAESLIDRKRPHPGQSSTETEFGDELIKRALAIVPPFLPPLPDLQSDFRSTSISTLYMQASLALSALLPADLRKMVPQIPPSFMIPPLPLSQFKSDQNILNSSSK…
	snail	HmN_000348000	TGTGGTCTGCCTTTGAACCTAACGG	GATTGGGGTGTTGGTGAGCTGGTG	MWSAFEPNGILLPASQSGNDTNTNNPIQAPDVFQMMWNSAFSSFVNPNTIKPGIERDEAVLQKHLCATSLLQQALSILSKRPSSELADTSIPSKNTEGESGGNSPPSFQNLSCSETTPNSPPWLPFGVVSTQPIKQTPPIIDLSKEKPQSPRKYDKFSIPHLLGQVSSSPDENVRPGKVCFECNNCGRSYVTKTGLQRHQNLCSSRVSESIPASPESLDPEDIQTTSPSPNNSNVSRQYTCHVCTKVYYSMSALKMHIRTHTLPCKCNICGKAFSRMWLLNGHLRTHTGEKPFACRVCQRAFADRSNLRAHMQTHSEVKRYRCEDCGKTFSRMGLLTKHTRSGCTNKTSTSSPTPQSAAQFPWNPPSIFS
	soxPF-1	HmN_000208300	TGAACGCTTGTAAACAGTGTGT	CTGACTTGTTGTGGCTGTGG	MEYTDLNSPLHYMNACKQCVITIDDGVESFIAHLTSEHAIPTEWPSDRASRLTGDEAKKPYTTIAATRKKRRKLTTPRPLNSFMIFAQHIRRNVLAIFETASSSNISRLLGQAWSKIPKEIRAAYDEEAARLSKIHNKEFPTYKYQPRPRHSQCCNGTAVSPRVDMDIDEDYDNDLSLPTQVPPLFTSSLSANPTFSSARLSISIPNSAQLSSSTAEQRLPSPLKLKPEPPSPTSTNSSSPFLSSSNSSNFKLKLSIPDIRPPRLAKRPSKFLKIAPVKISPKLPANSGDTQNNRSSPCLSTSSPPSRTPSPAQQLTPNHENIVPPAVSSSSIVQNTEVTSVQQRTAETLATLHKLLNQATAQQQQNQQQAQLQNQLQQQLQQQFQAAGREQNLSSSSG…
	tgfb-like	HmN_000204000	TGTTGTGCTGTATTTGCGAGCTGT	TCAACTGCAACCACATTCTTGAACA	MRSYYLVALLCCAVFASCTPTQNLYRQSRGIETESDTEPWMIDQPPTDHIIQDASLRQRQEEEEQREAIRLAEQQEFERQINIEKFKRTILQRLHMSEPPPFAFHGGFANRTNSEGVMEALPMALRNRIISQLRSEEVIDELPPDRTDERETLILLKHLHWKLPKVSSATFGISMADDIGPARIQSAFLQFETRNPLLKGQRLEVWEVFLTQEDEDELINAAVGPDLLKQYSNLTWMFDQTPTGYTSLPAPAVIRSSYDSIVHHQRSGSLRIREGRLAETYVSHGKDAVQVTFDISGAFSQWLSHRHRMPMMRKLVRSIIVICPKCDSRTDPVEVDKGILEIRHRNVVKRTRRKADAKNELTVENPCSTNGIKFSCCTQPFTLDFADVEWNTWIIHPKS…
	zf581200	HmN_000581200	CCTCTCTGTCTCCCAATTCTCAAA	GCCTCCATTATCCTGGTTATCCAT	MDVTGTDPRARTGLFLWPWATSGYSNMNSSNASGTNIQATSPLGLSSPSTGSFEQGIQMQHQQQNQSQQQDSSLESFYSRLPYSAGGGVPSLQQMQQHQRQQREAAVAAAQAISEMQGQQQQGLQQSSRMGPISSQASQSQSQIPTQPPPPPPQFDQRSGQLMNGRQAQATINSASSSPLNNSAYHNPSLSPNSQNQHPPHQQTQQQQQQQQQFQRHYSSAGSLQNVTGASPLDGRISSSASPSGSSAAPSYSLKRSSNDFNSATAMALALQAVAKGDRQMPPPPPSLPMHNSTASNQPVDHLQGGDMFSMNSANYLFQPPNMSKGPGGSSGGGIYSRSSSEAAAQMAAAMVANEMGMDPRSAGSTHPLSGLHAAGGFLPDFLSSSSVAMGDTKMDPSG…
	zf621400	HmN_000621400	ACATGGATCAGGATGAGTTCACAA	TCCACAATTGGGACATTCAAAAGG	MLASVCWSRLPDMDNNMDQDEFTINSSSPSHSLTLSVPESVENTSASNANLKTDPPTCSQCGKQFANIYRLQRHQLSHSDNEELRIHRCTQCSRAFKFKHHLKEHIRIHTGEKPFECQHCGTRFSHSGSYSSHMSSKKCTSRSANSISDDRPPNPSNKNGNSAPSASRDQGICFSITSEKESISIPNSDGNPIVSQEQVKQLANDRRPDVQNVMIMLQNARSWRRTIAVESTSLTSPNQNTPLDLSISKRESNGDLTKIKPPSSTSQFSSAFPLQFSSPIPPTNLSSNPQPQIISPMETNRNQSRGPLQEQSQLPLQDPTLSNMSQYQQCLYRLSTVLANQSSAPITTTIPLPSVPLDFLLQPYFLNPLTPLFGGTKEDQVLQSGRTQPQEDQSTPLNS…
	zf631300	HmN_000631300	AGTCCAGTTGGTGAAGCTAATTCT	AACTTTTAATGATGTCTGGCAGGC	MPCITNCESMDSETSGTDNKNNDKPNTESKRSDDRRSTSQSYPDIRLPLEVKMALNSSSDKPSLRATCDISVGHVWGPYRTAGIFRNISPVGEANSAMAYREIIILTRNSCDLIVRVNEENAWIKLLQETTFSDACNVEIDVDAAMETITVVALSNISSGSQIRGIIKLVHSNSMGASKSGSPSPPVISMGFSSTPGPISTSIGGPKRDKKCLYCGIFFSSVDTLTAHMANYCSRRPQLTSSGNTIGGNTSGTASNSADKSSVSTTDSSDSGVGKNSTTPNPAFPWPSRTTPGKRLNGNASSSTPQSPHSSNRMGHGGVAAGASPTGLHRALHLPSEMAGVFNAGDPFLSFATTLASLARLRPQLPSTDIPHLTSGPLHPQINHSKPLEEKSPCTPFCH…
	zf798800	HmN_000798800	AAATAGAGGGTAGTGAACTCAGCC	AGACAGGACTAGAAGGCAGACTAT	MTESRPLGSSDFDEIEGSELSLCCICGKTFTDRRSLHLHVAIVHEDSEAPPIAHSSTFLPTDESDNRKNGWFSNPALPLLSSALLAAAAAAAASTLNSEECGDESSDDSCHPQDLRIRRSPVDTLSSGSVSTAPLPTQAPIQSMPLQSQNLLNCQSNSSGSLTNQAPYLYKRYHDVSRETYDTQNDAINSGHSSINEYPSTDRLPSLANSPGVRAFQCSECQKSFSRNSDLQKHIDAVHKGLRPYECTTCQKRFSQKSSLKRHREAVHEGIKAFQCTHCSARFSYDVHLKRHTRAKHKNLSSNSNNGNNGGGGNSTTATMASLSSNSLPSSPVFQPTSLRQASI
	zyg11-like	HmN_000995400	CCTTACTCGACTGGACATATCTGG	ATCAATTGCTAGTAATTCAGCCGC	THRDPDKECPRYFWRNFPSNWRIVPQLSKKLMKGMRSRGSFKIELFSTDYTMLESFDLSYLEFNCHSCPPELLNGLTMRDLNMAYAKGITLNEAIFNMNEETRKNLTRLDISGMEMFDVSDLGRLSNLNSLNISFTCVTADDLRVIVKVCSHLKYLDISGTPIRDISCLLSLKDQLVGLIMHFKETPRRCVLSKMISTILKLEELQTLELSCLKRTINDLPPMTDVCSSGSLIHLKHFDICGNPLYFSLDTIREFIEKHPNIEFLGLAFWPDFVEAHDFYQLSLDYPHIVMSGDVRESLLLEKIRRYMGRDHFCTEMLMDFFTVSPGQEIGSPKILETVLDLVDEVPNSKTTRELYQETLLCLAEYLYAVDLTGALGQRVMESVLDYIIRFDDGYRFLR…
